# Supplementary material for: Multi-omics colocalization with genome-wide association studies reveals a context-specific genetic mechanism at a childhood onset asthma risk locus
Source: Genome Med. 2021 Oct 10;13:157. doi: 10.1186/s13073-021-00967-y (PMC8504130; doi:10.1186/s13073-021-00967-y)
Supplement: Supplementary file 3 — Additional file 3: Gene expression PCA results for unadjusted (Gx Unadjusted) and adjusted (Gx Adjusted) data. P-values are shown for correlations for the first 10 PCs with each covariate. [file 13073_2021_967_MOESM3_ESM.xlsx]

## Sheet: Legend for Additional File 3
Additional File 3 Gene expression PCA results for unadjusted (Gx Unadjusted) and adjusted (Gx Adjusted) data. P-values are shown for correlations for the first 10 PCs with each covariate.

## Sheet: Gx Unadjusted
	Prop. of variation	batch_lysate	treatment	collection_method	sex	atopy	asthma	steroid	smoking	poolII	crs	ucid	combo	tech	qPCR_batch	adapter	flowcell_lane	surgeon	rin	fragment_length_bioana	age	nM_qPCR	nM_qPCR_avg	qPCR_nM_replace	RNA_conc	reads_total	mapped_reads	mapped_unmapped_ratio	mapped_percent	initial_cult_days	cryo_days	exp_cult_days	Anc_PC1	Anc_PC2	Anc_PC3	Anc_PC4	Anc_PC5	Anc_PC6	Anc_PC7	Anc_PC8	Anc_PC9	Anc_PC10	sv1	sv2	sv3	sv4	sv5	sv6	sv7
PC1	0.41755	1.86272e-15	0.951304	0.00131909	0.964382	0.429848	0.286423	0.0252458	0.00502941	0.00319697	0.415955	1.57574e-68	0.882082	0.455743	6.14852e-06	0.936209	0.00140593	0.0301249	8.75127e-05	0.141206	0.169194	0.770073	0.869729	0.0525094	1.37288e-38	0.827644	0.713521	2.69218e-11	0.0103934	0.00779577	6.2769e-05	0.559231	0.0218421	0.775436	0.414713	0.0341387	0.930162	0.0316098	0.0143686	0.142636	0.0156578	0.343596	3.60865e-225	0.862604	0.852349	0.802773	0.991888	0.725983	0.927576
PC2	0.07409	0.000133783	0.880979	0.738807	7.09059e-06	0.257613	0.921456	0.645026	0.00738493	0.181852	0.200301	4.74931e-14	0.500463	6.54681e-09	0.0125575	0.131408	0.144122	0.765442	0.476998	0.0237344	0.650641	0.574732	0.377358	0.0663347	0.471816	0.0105577	0.0314653	0.000130904	2.65787e-09	0.29434	0.517728	0.349727	0.0735669	0.624346	0.0211467	0.00236141	0.283474	0.468463	0.14335	0.081963	0.415459	0.783852	0.905944	1.49294e-102	0.000151819	0.739477	0.291877	0.84241	0.886333
PC3	0.06895	0.206077	0.00651767	0.817257	0.11086	0.378316	0.366036	0.868012	0.0119254	0.303642	0.010183	7.70882e-20	0.00263683	0.991601	0.238866	0.79462	0.185262	0.515249	3.52912e-08	0.174345	0.461055	0.147459	0.299473	0.31634	0.000819802	0.190606	0.0940344	0.798214	0.00254039	0.207763	0.842362	5.34933e-09	0.13313	0.32061	0.186794	0.113737	0.130598	0.957158	0.451925	0.225794	0.112556	0.399911	0.685527	0.000602306	1.4132e-56	7.18785e-07	0.949769	0.895057	0.193023
PC4	0.05736	0.000282119	1.17174e-09	0.76423	0.234731	0.00957256	0.322692	0.248401	0.734176	0.153987	0.330786	9.05625e-06	2.87883e-08	0.14604	0.00941817	1.96253e-05	0.179301	0.759956	0.187266	0.0335313	0.644928	0.465696	0.474721	0.703776	0.993031	0.0397744	0.0298734	0.236267	0.512684	0.659947	0.56446	0.338381	0.00398988	0.235452	0.652359	0.188737	0.381436	0.298926	0.805636	0.10797	0.0394032	0.748971	0.596839	0.147455	1.49974e-07	2.62529e-24	0.854315	3.69835e-09	0.804474
PC5	0.03973	0.00150094	4.48175e-07	0.424034	0.0209177	0.534519	0.100534	0.756064	0.327724	0.00352372	0.328052	2.43678e-08	7.75599e-06	0.777837	0.000450646	0.0346714	0.00327681	0.0492306	0.762561	6.97569e-07	0.0500251	0.650236	0.629991	0.682494	0.446264	0.260522	0.263395	0.000173851	4.16119e-05	0.0188223	0.264928	0.234585	0.149881	2.24824e-05	0.681432	0.082402	0.0361084	0.295909	0.639756	0.00172092	0.702311	0.191856	0.715674	0.728471	0.0376231	6.1725e-21	0.0125435	8.67293e-20	0.765053
PC6	0.03555	9.91753e-08	0.282295	0.483073	0.0258576	0.302692	0.00817522	0.84489	0.444079	0.0800893	0.643699	1.61608e-14	0.636521	0.236386	0.0844742	0.681732	0.0985567	0.213425	0.0284318	0.470036	0.153536	0.172475	0.220486	0.843643	0.466071	0.902141	0.982832	0.147867	0.491444	0.590103	0.122471	0.0370651	0.502817	0.157408	0.000232567	0.52109	0.0446481	0.323024	0.113063	0.569814	0.78182	0.974064	0.959559	0.357492	0.438587	0.11192	2.60386e-124	0.204954	0.46416
PC7	0.0247	0.000286961	5.33383e-08	0.445567	0.0495767	0.122397	0.243992	0.605962	0.654896	0.763404	0.557788	4.64286e-07	1.49224e-06	0.866547	0.0256261	0.00473662	0.81984	0.724675	0.000667242	0.768415	0.758551	0.962237	0.997942	0.840211	0.0999909	0.112162	0.065393	0.926569	0.898607	0.11873	0.0218999	0.0631129	0.000404543	0.000762184	0.280728	0.250304	0.120426	0.119709	0.802648	0.202302	0.38984	0.00852138	0.913805	0.753928	0.307594	0.0152745	0.775762	1.26665e-18	0.000136533
PC8	0.02061	0.593314	0.208444	0.232854	0.0422821	0.00669091	3.65197e-06	0.233551	0.552639	0.0372854	0.125776	4.58385e-21	0.213755	0.281341	0.436232	0.0408035	0.000733494	0.0476668	0.597597	0.496645	0.164221	0.022233	0.0141703	0.030759	0.7034	0.995391	0.239382	0.395139	0.0163204	0.658856	0.764386	0.000372303	0.00101516	0.0262721	0.0619288	0.525327	0.963476	0.457687	0.279072	0.452361	0.872495	0.638923	0.885929	0.535185	0.131176	0.10506	0.444431	0.107358	4.43279e-73
PC9	0.01491	1.0754e-05	0.0723153	0.0330189	0.191978	0.00307146	0.344109	0.810392	0.645557	0.268876	0.00409604	2.07376e-32	0.00898131	0.109295	0.378825	0.74742	0.181379	0.0288076	0.28336	0.73439	0.159701	0.534145	0.919674	0.0418135	0.301556	0.0182126	0.00644298	0.034876	0.855639	0.134112	0.104983	0.000968847	0.000561645	0.00265225	0.00632258	0.94188	0.0299039	0.279201	0.701763	0.574088	0.670968	0.429588	0.966463	0.961541	0.424026	0.307445	0.839657	0.513314	0.0787765
PC10	0.01073	0.119335	0.0195181	2.22534e-08	0.000759106	0.00700083	0.00239917	0.000310467	0.0980282	0.000498168	1.83359e-14	1.27848e-29	2.73799e-14	0.00626117	0.0549382	0.675553	0.0011756	0.0050251	0.405427	0.789367	0.0330899	0.472134	0.407276	0.343085	0.22686	0.122342	0.249838	0.864018	0.928532	0.882085	0.281318	0.715785	0.00255177	0.965441	0.951858	0.0921173	0.356629	0.106082	0.548749	0.485548	0.343648	0.333979	0.859561	0.844198	0.945968	0.829386	0.833048	0.0546202	0.155982
[truncated: 8 more columns]

## Sheet: Gx Adjusted
	Prop. of variation	batch_lysate	treatment	collection_method	sex	atopy	asthma	steroid	smoking	poolII	crs	tech	qPCR_batch	flowcell_lane	surgeon	rin	fragment_length_bioana	age	nM_qPCR	nM_qPCR_avg	qPCR_nM_replace	RNA_conc	reads_total	mapped_reads	mapped_unmapped_ratio	mapped_percent	initial_cult_days	cryo_days	exp_cult_days	Anc_PC1	Anc_PC2	Anc_PC3	Anc_PC4	Anc_PC5	Anc_PC6	Anc_PC7	Anc_PC8	Anc_PC9	Anc_PC10	sv1	sv2	sv3	sv4	sv5	sv6	sv7	sv8	sv9	sv10
PC1	0.20724	1	1.08123e-36	0.734905	1	0.521539	0.383066	0.871081	1	1	0.570808	1	0.891542	1	0.603198	0.601963	1	0.731407	0.701592	0.606653	0.398517	1	0.977091	0.928805	0.135497	0.590763	0.85726	1	1	1	1	1	0.243644	0.256055	0.25343	0.59714	0.864492	0.631625	0.274536	1	1	1	1	1	1	1	1	1	1
PC2	0.04423	1	0.000984986	0.0406322	1	0.589763	0.275543	0.643982	1	1	0.125539	1	0.852757	1	0.136691	0.535434	1	0.203249	0.855304	0.797809	0.650261	1	0.941475	0.925241	0.503384	0.186062	0.17142	1	1	1	1	1	0.442813	0.961854	0.735657	0.171577	0.21673	0.194707	0.604129	1	1	1	1	1	1	1	1	1	1
PC3	0.03098	1	0.218443	0.515294	1	0.104587	0.181095	0.0256539	1	1	0.451119	1	0.826121	1	0.0284024	0.0614324	1	0.203258	0.396147	0.571982	0.431092	1	0.162769	0.0933302	0.689903	0.91815	0.434026	1	1	1	1	1	0.575725	0.278466	0.876886	0.457263	0.889648	0.14062	0.132305	1	1	1	1	1	1	1	1	1	1
PC4	0.03001	1	0.667821	0.482388	1	0.241473	0.466365	0.0451688	1	1	0.49177	1	0.41889	1	0.0768655	0.837561	1	0.00373082	0.071944	0.130953	0.824761	1	0.241894	0.465967	0.172056	0.565903	0.103948	1	1	1	1	1	0.611074	0.310796	0.0155502	0.0287982	0.359257	0.451298	0.688694	1	1	1	1	1	1	1	1	1	1
PC5	0.02509	1	0.241616	0.359644	1	0.188128	0.569788	0.661479	1	1	0.490721	1	0.960105	0.999999	0.0383126	0.477197	1	0.808187	0.515924	0.703115	0.399948	1	0.529398	0.212282	0.319276	0.873032	0.998191	1	1	1	1	1	0.727041	0.471197	0.604178	0.466246	0.00577066	0.0831721	0.103414	1	1	1	1	1	1	1	1	1	1
PC6	0.02349	1	0.870328	0.0579086	1	0.799343	0.739119	0.00575421	1	1	0.557775	1	0.501796	0.999996	0.000760164	0.309266	1	0.997238	0.942078	0.84701	0.235988	1	0.667994	0.639643	0.444981	0.856767	0.0814006	1	1	1	1	1	0.319325	0.00121684	0.314976	0.052552	0.283629	0.436737	0.163715	1	1	1	1	1	1	1	1	1	1
PC7	0.02234	1	0.755082	0.77651	1	0.764778	0.037737	0.0440054	1	1	0.27829	1	0.400077	1	0.0500462	0.429608	1	0.432129	0.987499	0.929222	0.727968	1	0.93604	0.825181	0.083224	0.219828	0.200037	1	1	1	1	1	0.964264	0.35784	0.0698849	0.146291	0.230719	0.888738	0.0566486	1	1	1	1	1	1	1	1	1	1
PC8	0.02181	1	0.301661	0.89392	1	0.783442	0.113647	0.318137	1	1	0.745849	1	0.236786	1	0.171732	0.68836	1	0.0714997	0.865436	0.937788	0.29778	1	0.974713	0.669156	0.637549	0.17451	0.132344	1	1	1	1	1	0.0146141	0.815871	0.00471154	0.952578	0.894138	0.725881	0.920275	1	1	1	1	1	1	1	1	1	1
PC9	0.02154	1	0.779379	0.616402	1	0.682518	0.258556	0.25347	1	1	0.0407121	1	0.497912	1	0.136288	0.921425	1	0.104034	0.427955	0.574075	0.563363	1	0.964057	0.696502	0.517957	0.431745	0.578228	1	1	1	1	1	0.846814	0.47969	0.960272	0.781892	0.287355	0.458273	0.446815	1	1	1	1	1	1	1	1	1	1
PC10	0.02033	1	0.423622	0.109939	1	0.316066	0.0237295	0.348657	1	1	0.0391938	1	0.290341	1	0.0413805	0.898646	1	0.83808	0.666459	0.464642	0.0976758	1	0.801257	0.475151	0.387372	0.505236	0.304271	1	1	1	1	1	0.0330202	0.765261	0.667224	0.306061	0.346269	0.581393	0.945712	1	1	1	1	1	1	1	1	1	1
[truncated: 5 more columns]
