# Supplementary material for: Multi-omics colocalization with genome-wide association studies reveals a context-specific genetic mechanism at a childhood onset asthma risk locus
Source: Genome Med. 2021 Oct 10;13:157. doi: 10.1186/s13073-021-00967-y (PMC8504130; doi:10.1186/s13073-021-00967-y)
Supplement: Supplementary file 4 — Additional file 4: DNA methylation covariate correlation matrix of correlation coefficients (DNA methylation correlation), p-values (DNA methylation pval), and correlation tests (DNA methylation test). [file 13073_2021_967_MOESM4_ESM.xlsx]

## Sheet: Legend for Additional File 4
Additional File 4 DNA methylation covariate correlation matrix of correlation coefficients (DNAm correlation), p-values (DNAm pval), and correlation tests (DNAm test).

## Sheet: DNAm correlation
	treatment	crs	atopy	asthma	steroid	smoking	sex	sample_well	plate	rv.harvest	initial_culture_days	cryo_days	exp_culture_days_RV	collection_method	age	DNA_concentration	surgeon	batch	chip_position	chip	PC1	PC2	PC3	PC4	PC5	PC6	PC7	PC8	PC9	PC10	SV1	SV2	SV3	SV4	SV5	SV6	SV7	SV8	SV9	SV10	SV11	SV12	SV13	SV14	SV15	SV16	SV17	SV18	SV19
treatment	1	0	0	0	-2.84217e-11	0	0	0.0353367	-0.128887	0	0	0	2.84217e-11	0	0	0	0	0	0.0383527	0.00554102	0	0	0	0	0	-2.84217e-11	0	0	0	0	0.0247153	-0.0631778	-0.174654	0.0504794	0.028083	-0.0413569	-0.0631968	0.00432117	0.0221606	0.171417	-0.0383327	-0.0708921	0.12111	-0.15079	0.101863	-0.240631	-0.0168429	-0.0180839	-0.043545
case_control	0	1	0.449527	-0.465692	-0.229282	0.249645	0.432646	0.177336	-0.00296021	0.0570477	0.467292	-0.225745	0.0610443	-0.784906	0.324278	-0.00721416	0.27723	0.0276732	0.20986	0.0564232	-0.077113	-0.134489	-0.133722	-0.0110772	0.0423115	0.0992611	0.0569623	0.121536	-0.117704	0.0396386	-0.177305	-0.282406	-0.232627	-0.659932	-0.151391	0.138405	0.16886	0.248211	-0.168761	-0.0315409	0.0211135	-0.130404	0.236264	0.170838	-0.00419939	-0.0377522	-0.179726	-0.0128588	0.0226154
atopy	0	0.449527	1	-0.516998	-0.0232113	0.0544484	0.104308	0.0501228	-0.0317798	0.0593042	0.693684	-0.145165	-0.038982	-0.104071	-0.0580909	0.0458423	-0.0550572	-0.135809	0.0664168	-0.1303	0.0129422	-0.221903	-0.0604746	-0.251419	-0.0648317	0.0874823	0.0180579	0.160299	0.0418942	-0.00970678	0.050423	-0.0476492	0.00700168	-0.47188	0.129282	-0.0357125	0.0451616	0.288361	0.00240413	0.140543	-0.0543106	-0.0155632	0.039009	-0.09661	-0.0463359	-0.129783	-0.151663	-0.09756	0.0845771
asthma	0	-0.465692	-0.516998	1	0.341093	0.108931	0.0592044	-0.162186	0.00466647	0.067716	-0.0945174	0.17468	-0.1657	0.360012	-0.057929	0.125109	-0.153855	0.173878	-0.185526	-0.0400943	0.126207	0.217611	-0.123458	0.071768	-0.00572938	0.103399	0.0517887	-0.0897119	0.172025	0.0122791	0.0723322	0.0656411	0.221069	0.376456	-0.131781	-0.0441565	-0.101447	-0.146395	0.0275574	0.0400462	0.0418531	0.164233	-0.284253	0.0658264	0.112708	-0.117545	0.135038	0.02037	0.0306291
steroid	-2.84217e-11	-0.229282	-0.0232113	0.341093	1	-0.0201822	0.229949	-0.22794	-0.0727395	0.0164726	-0.0770068	0.2038	-0.0470123	0.0388381	-0.0316964	0.32841	0.0469245	-0.236823	-0.252282	0.0650787	-0.0124726	0.101403	-0.0445985	-0.104774	-0.11257	0.218318	0.0187073	-0.0479456	0.137058	-0.0694879	0.0766504	0.13191	-0.0468209	0.0808799	0.0126088	-0.00489897	0.0753061	0.0935929	0.0858724	-0.0387606	-0.0868303	0.244332	0.0372894	-0.123189	0.171175	-0.0704765	0.166563	-0.0765148	0.170479
smoking	0	0.249645	0.0544484	0.108931	-0.0201822	1	0.176432	-0.0267486	0.0291017	0.109235	-0.0984083	0.20696	-0.125034	-0.212335	0.392612	-0.075057	0.111946	0.181334	0.0194253	-0.0741858	0.0789776	-0.0350912	0.129103	-0.172926	-0.0753933	0.0462539	-0.0792635	-0.0445162	0.0929586	0.0439397	-0.11201	0.038439	0.0358952	-0.163101	0.125952	0.198367	-0.077328	-0.0355679	0.0147571	-0.0917146	-0.0774065	0.172997	0.0849217	0.0978216	-0.0980989	-0.151322	-0.0715288	0.0962873	-0.218236
sex	0	0.432646	0.104308	0.0592044	0.229949	0.176432	1	0.0306805	-0.0458449	0.22383	-0.0863109	-0.124336	0.195781	-0.082832	-0.00511103	0.0371821	-0.0190632	-0.173691	0.071412	-0.015405	-0.284609	0.0645549	-0.176396	0.0351885	-0.141132	0.258125	-0.0326344	0.0128877	-0.0556379	-0.00598059	-0.0967088	-0.120306	-0.0337322	-0.14762	0.00795007	0.0252036	0.486495	0.212189	0.0547698	0.153716	0.393021	0.129948	0.318461	0.0457982	0.0442046	0.185639	-0.183651	-0.0542062	0.0449151
sample_well	0.0353367	0.177336	0.0501228	-0.162186	-0.22794	-0.0267486	0.0306805	1	-0.260609	0.058409	0.000129644	-0.00297831	0.0425383	-0.176158	-0.0356575	-0.0557945	0.0641555	-0.0508335	NA	0.00918545	0.0193337	-0.107571	0.00312458	0.0632263	0.0443205	-0.105695	-0.0120689	-0.041545	0.0370213	0.154415	-0.11281	-0.0510356	0.088993	-0.200759	0.00823814	-0.00415088	-0.117854	-0.0119805	0.00462146	0.137683	0.0401533	-0.114185	0.139558	0.160792	0.0724299	-0.0307482	-0.0343883	-0.116633	0.0142292
plate	-0.128887	-0.00296021	-0.0317798	0.00466647	-0.0727395	0.0291017	-0.0458449	-0.260609	1	-0.0164712	0.122209	0.0188975	0.0236838	-0.0170286	0.0650025	-0.0244336	-0.0200011	-0.00751259	-0.28342	0.118183	-0.0659544	0.0140348	0.12637	-0.0510958	0.0948511	0.091971	-0.0692487	0.010697	-0.0396935	-0.0210183	-0.0199038	-0.0169382	0.156928	-0.0490322	-0.092816	0.0589745	-0.00241367	-0.0565142	0.073905	-0.170036	-0.0389197	0.00082055	0.266899	-0.247656	-0.0954578	0.0727302	0.0287521	0.000979443	-0.106553
rv.harvest	0	0.0570477	0.0593042	0.067716	0.0164726	0.109235	0.22383	0.058409	-0.0164712	1	0.104524	-0.248869	0.0868706	-0.0922284	-0.0789713	-0.0243248	0.0801641	0.340456	0.0629497	0.0365214	-0.113885	0.180973	-0.0177815	0.0106223	-0.283914	-0.204585	0.0130178	0.0691052	-0.028522	-0.00839905	-0.086625	-0.040162	-0.099485	-0.0512252	-0.165412	-0.104055	-0.0653912	0.0620898	0.0431232	0.199424	-0.106358	-0.0629906	0.0492614	0.0508364	-0.113269	0.0354407	-0.0349603	0.175518	0.0828902
initial_culture_days	0	0.467292	0.693684	-0.0945174	-0.0770068	-0.0984083	-0.0863109	0.000129644	0.122209	0.104524	1	-0.207579	-0.115896	-0.358168	-0.091626	-0.0927264	-0.0968083	0.0819396	0.0112142	0.0221653	0.0385313	-0.0622939	-0.00839183	-0.0329992	0.0306632	0.0802594	-0.00341126	-0.0857128	-0.0711189	0.00162421	-0.0248889	-0.0531473	-0.0122933	-0.161115	-0.0991265	-0.0192482	-0.0380094	-0.0480164	0.0294089	-0.0794828	-0.0535171	-0.0424587	-0.0589589	0.117593	-0.12526	-0.0225968	0.0113603	0.0357162	0.139174
cryo_days	0	-0.225745	-0.145165	0.17468	0.2038	0.20696	-0.124336	-0.00297831	0.0188975	-0.248869	-0.207579	1	-0.0548633	0.218502	0.068145	0.133778	0.00888756	-0.282593	0.0126419	-0.0294868	0.136953	0.000360507	0.113542	0.0581372	0.0619714	0.0499784	-0.0535564	-0.108026	0.0084232	0.252035	0.10054	-0.103282	0.0129164	-0.018411	0.226545	0.00762364	-0.0548019	0.00255068	0.135838	-0.0292797	0.0319129	0.0820977	0.0792299	0.0247258	0.146521	-0.20772	0.117926	-0.0702877	-0.0639304
exp_culture_days_RV	2.84217e-11	0.0610443	-0.038982	-0.1657	-0.0470123	-0.125034	0.195781	0.0425383	0.0236838	0.0868706	-0.115896	-0.0548633	1	-0.108408	-0.0239756	-0.0665867	0.0754776	-0.153073	0.0370659	0.0012221	-0.0322496	0.00161414	0.0670131	0.163658	0.0124105	-0.0248126	0.249512	0.0866009	0.0178463	0.0716511	-0.170083	0.136032	-0.0700946	-0.268652	-0.0129701	-0.212959	-0.019457	0.00219322	0.0287918	0.149754	-0.0202785	0.170103	0.0426277	-0.0395139	0.092284	0.167129	0.0678641	-0.0255662	0.0917194
collection_method	0	-0.784906	-0.104071	0.360012	0.0388381	-0.212335	-0.082832	-0.176158	-0.0170286	-0.0922284	-0.358168	0.218502	-0.108408	1	-0.315948	-0.0236927	-0.439838	-0.0898584	-0.165016	-0.0361742	0.02003	0.123365	-0.0225909	0.109842	-0.148597	-0.115506	0.0172845	0.0461765	0.0656786	-0.0532764	0.225209	0.240456	0.270876	0.468774	0.0933354	-0.126477	0.0380741	0.0333435	0.101664	0.252684	0.113402	0.00924095	-0.0831325	-0.176681	-0.0955294	-0.0780878	0.187284	-0.0141701	0.0476816
age	0	0.324278	-0.0580909	-0.057929	-0.0316964	0.392612	-0.00511103	-0.0356575	0.0650025	-0.0789713	-0.091626	0.068145	-0.0239756	-0.315948	1	0.0184374	0.16425	-0.0517445	-0.0407042	0.0809657	-0.0847959	0.131776	0.107923	-0.110873	0.126937	0.103043	-0.0516346	0.0873189	0.0109036	-0.053103	-0.0128525	-0.00255503	-0.0952252	-0.191867	-0.101785	0.502335	0.00216587	-0.100681	-0.190776	-0.245178	-0.123479	0.257611	0.124571	0.00824989	0.226378	-0.115225	-0.0543732	0.13178	-0.154287
DNA_concentration	0	-0.00721416	0.0458423	0.125109	0.32841	-0.075057	0.0371821	-0.0557945	-0.0244336	-0.0243248	-0.0927264	0.133778	-0.0665867	-0.0236927	0.0184374	1	0.119002	-0.217558	-0.0580927	-0.0810728	0.00630482	0.0130979	-0.187011	-0.0997945	0.0202682	0.246385	0.0391079	0.0192697	0.0797147	0.0582859	0.258842	-0.231306	0.105997	0.0504079	-0.111592	-0.0904311	-0.0515852	-0.0598371	0.0128159	0.103494	-0.104304	0.153476	0.0178064	0.00363918	0.00464233	-0.0498683	-0.0641339	-0.047064	0.184285
surgeon	0	0.27723	-0.0550572	-0.153855	0.0469245	0.111946	-0.0190632	0.0641555	-0.0200011	0.0801641	-0.0968083	0.00888756	0.0754776	-0.439838	0.16425	0.119002	1	-0.030371	0.068669	0.0297573	0.0416546	0.149988	-0.24471	0.188297	0.101574	-0.0977868	-0.0730078	-0.110076	0.134911	-0.0444178	0.0275835	-0.356141	-0.128114	-0.129281	-0.109946	0.187443	-0.111258	-0.231813	-0.140748	-0.0186507	-0.0127649	0.04947	0.0461944	0.0457128	0.00101647	0.0108063	0.176723	-0.0626893	0.0986295
batch	0	0.0276732	-0.135809	0.173878	-0.236823	0.181334	-0.173691	-0.0508335	-0.00751259	0.340456	0.0819396	-0.282593	-0.153073	-0.0898584	-0.0517445	-0.217558	-0.030371	1	-0.0525871	0.173242	0.227541	-0.157676	-0.0834639	0.091076	-0.120505	-0.117793	-0.0268325	0.00323428	-0.0659777	-0.0983696	-0.258646	0.0296517	-0.151328	0.0575652	-0.100118	-0.0567029	-0.0863432	-0.00491165	0.0984098	-0.127095	-0.0301793	-0.343295	-0.174152	0.0333688	-0.259922	-0.0298858	0.140948	0.256206	0.0136396
chip_position	0.0383527	0.20986	0.0664168	-0.185526	-0.252282	0.0194253	0.071412	NA	-0.28342	0.0629497	0.0112142	0.0126419	0.0370659	-0.165016	-0.0407042	-0.0580927	0.068669	-0.0525871	1	0.00842376	0.00689704	-0.110486	-0.0353341	0.0904515	0.0155351	-0.0914845	-0.039614	-0.0553372	0.0149753	0.166846	-0.126391	-0.0681774	0.0900011	-0.212849	-0.0062607	0.00384266	-0.118726	-0.0264736	-0.00688064	0.158077	0.0756489	-0.109972	0.187451	0.172409	0.0388311	-0.0231911	-0.0471023	-0.134834	0.0198853
chip	0.00554102	0.0564232	-0.1303	-0.0400943	0.0650787	-0.0741858	-0.015405	0.00918545	0.118183	0.0365214	0.0221653	-0.0294868	0.0012221	-0.0361742	0.0809657	-0.0810728	0.0297573	0.173242	0.00842376	1	-0.124143	-0.00211009	-0.118986	0.0762195	-0.0716652	-0.100349	-0.1106	-0.0585632	-0.0179333	-0.116803	-0.186542	-0.0288637	-0.206818	-0.0344804	0.0874601	0.0121326	-0.0372382	-0.0859104	-0.160689	0.0214287	-0.00968804	-0.135681	0.096011	-0.308787	0.127935	0.08161	0.15759	0.129156	0.0872213
PC1	0	-0.077113	0.0129422	0.126207	-0.0124726	0.0789776	-0.284609	0.0193337	-0.0659544	-0.113885	0.0385313	0.136953	-0.0322496	0.02003	-0.0847959	0.00630482	0.0416546	0.227541	0.00689704	-0.124143	1	-0.463094	-0.0640219	0.0714801	0.0460585	0.208882	-0.129575	-0.101423	-0.000613199	0.136742	0.0325813	0.0497828	-0.0623472	0.0422956	-0.157815	-0.101621	-0.0498243	0.0514122	0.123933	-0.268483	-0.154539	-0.316266	-0.276728	0.322234	-0.172169	-0.453283	0.102792	-0.223031	0.0810093
PC2	0	-0.134489	-0.221903	0.217611	0.101403	-0.0350912	0.0645549	-0.107571	0.0140348	0.180973	-0.0622939	0.000360507	0.00161414	0.123365	0.131776	0.0130979	0.149988	-0.157676	-0.110486	-0.00211009	-0.463094	1	0.0631339	0.0332795	-0.125934	-0.044607	0.0698714	-0.0324707	0.154894	-0.222329	0.0704629	-0.143044	0.0348661	0.0673204	0.0468643	0.136314	-0.144994	-0.178682	-0.0138808	0.0962126	0.165167	0.39775	0.0355248	-0.025343	0.0152831	0.204364	0.168758	0.208621	-0.142775
PC3	0	-0.133722	-0.0604746	-0.123458	-0.0445985	0.129103	-0.176396	0.00312458	0.12637	-0.0177815	-0.00839183	0.113542	0.0670131	-0.0225909	0.107923	-0.187011	-0.24471	-0.0834639	-0.0353341	-0.118986	-0.0640219	0.0631339	1	-0.258296	0.0562379	-0.166338	-0.0555349	0.00806544	-0.0772453	0.0279845	0.0627797	0.321867	0.0396715	0.0722402	0.213145	-0.0358984	-0.0871043	-0.126193	-0.0823674	-0.00275856	-0.12845	0.0297324	0.00250522	-0.0071109	0.134598	-0.00817654	-0.0311567	-0.0604879	-0.146649
PC4	0	-0.0110772	-0.251419	0.071768	-0.104774	-0.172926	0.0351885	0.0632263	-0.0510958	0.0106223	-0.0329992	0.0581372	0.163658	0.109842	-0.110873	-0.0997945	0.188297	0.091076	0.0904515	0.0762195	0.0714801	0.0332795	-0.258296	1	0.0615862	-0.0397786	0.0761466	-0.0638345	-0.00111443	0.156994	-0.0697373	0.0379376	-0.0551692	0.0226248	0.00139975	-0.00878633	0.0501886	-0.0477204	0.0184928	0.0386739	0.0835993	0.0244262	0.0477744	0.0223031	-0.188286	-0.0328791	0.0882174	0.0842451	0.0746792
PC5	0	0.0423115	-0.0648317	-0.00572938	-0.11257	-0.0753933	-0.141132	0.0443205	0.0948511	-0.283914	0.0306632	0.0619714	0.0124105	-0.148597	0.126937	0.0202682	0.101574	-0.120505	0.0155351	-0.0716652	0.0460585	-0.125934	0.0562379	0.0615862	1	0.100335	0.0253516	0.139231	0.0538294	0.287609	0.184674	0.0554801	0.0561277	-0.0503128	0.0301806	-0.0531966	-0.0629155	-0.0506707	0.130202	-0.125007	-0.062826	-0.00256243	0.0770239	0.13005	0.179917	-0.0092483	0.0150648	-0.0439602	0.0250281
PC6	-2.84217e-11	0.0992611	0.0874823	0.103399	0.218318	0.0462539	0.258125	-0.105695	0.091971	-0.204585	0.0802594	0.0499784	-0.0248126	-0.115506	0.103043	0.246385	-0.0977868	-0.117793	-0.0914845	-0.100349	0.208882	-0.044607	-0.166338	-0.0397786	0.100335	1	0.130601	-0.193362	-0.0362984	0.0167015	0.0615959	0.0333332	0.142345	-0.0272065	-0.103338	0.08078	0.0351881	0.0706645	0.110369	-0.121297	-0.0992274	0.0403721	0.117882	0.196571	0.0886263	-0.0524047	-0.163214	-0.0751985	0.0339223
PC7	0	0.0569623	0.0180579	0.0517887	0.0187073	-0.0792635	-0.0326344	-0.0120689	-0.0692487	0.0130178	-0.00341126	-0.0535564	0.249512	0.0172845	-0.0516346	0.0391079	-0.0730078	-0.0268325	-0.039614	-0.1106	-0.129575	0.0698714	-0.0555349	0.0761466	0.0253516	0.130601	1	-0.049103	-0.0870742	-0.175255	0.042792	0.156625	-0.0807862	0.0572889	-0.028104	-0.0140576	-0.0756921	0.0077093	0.119256	0.0554852	0.123463	0.0582915	0.0790328	-0.0916431	0.152143	-0.0288953	-0.143435	0.0930581	0.0754652
PC8	0	0.121536	0.160299	-0.0897119	-0.0479456	-0.0445162	0.0128877	-0.041545	0.010697	0.0691052	-0.0857128	-0.108026	0.0866009	0.0461765	0.0873189	0.0192697	-0.110076	0.00323428	-0.0553372	-0.0585632	-0.101423	-0.0324707	0.00806544	-0.0638345	0.139231	-0.193362	-0.049103	1	0.0748049	0.0934119	0.107967	0.15743	-0.201061	-0.202571	-0.0436819	-0.0101843	0.120973	0.0881355	-0.00159783	0.0386898	0.00429239	0.0172407	-0.0546942	-0.0264467	-0.0217368	0.0561158	-0.0129161	0.0331591	-0.00441162
PC9	0	-0.117704	0.0418942	0.172025	0.137058	0.0929586	-0.0556379	0.0370213	-0.0396935	-0.028522	-0.0711189	0.0084232	0.0178463	0.0656786	0.0109036	0.0797147	0.134911	-0.0659777	0.0149753	-0.0179333	-0.000613199	0.154894	-0.0772453	-0.00111443	0.0538294	-0.0362984	-0.0870742	0.0748049	1	0.0187255	0.062454	0.0285005	0.0865265	-0.0148846	0.0519844	0.0393801	-0.0394521	-0.0511967	0.0690783	-0.0968625	-0.0856009	0.130835	-0.0862231	-0.102009	-0.177406	0.0650647	0.18553	-0.118174	-0.0333789
PC10	0	0.0396386	-0.00970678	0.0122791	-0.0694879	0.0439397	-0.00598059	0.154415	-0.0210183	-0.00839905	0.00162421	0.252035	0.0716511	-0.0532764	-0.053103	0.0582859	-0.0444178	-0.0983696	0.166846	-0.116803	0.136742	-0.222329	0.0279845	0.156994	0.287609	0.0167015	-0.175255	0.0934119	0.0187255	1	0.219922	0.0434463	0.00692106	-0.0433264	0.077602	0.0282271	0.0617951	-0.183321	0.209557	0.107875	-0.101132	-0.170853	0.0854028	0.209087	-0.0478088	-0.00011767	0.0498096	-0.0509443	0.078598
SV1	0.0247153	-0.177305	0.050423	0.0723322	0.0766504	-0.11201	-0.0967088	-0.11281	-0.0199038	-0.086625	-0.0248889	0.10054	-0.170083	0.225209	-0.0128525	0.258842	0.0275835	-0.258646	-0.126391	-0.186542	0.0325813	0.0704629	0.0627797	-0.0697373	0.184674	0.0615959	0.042792	0.107967	0.062454	0.219922	1	-0.00560563	-0.0167678	0.0139062	-0.0099087	0.00620625	0.00550014	-0.00588284	0.00193594	-0.00695303	-0.00829471	0.00324967	-0.000543888	-0.00184959	-0.00480814	-0.0046846	0.00185574	0.000500682	-0.00434668
SV2	-0.0631778	-0.282406	-0.0476492	0.0656411	0.13191	0.038439	-0.120306	-0.0510356	-0.0169382	-0.040162	-0.0531473	-0.103282	0.136032	0.240456	-0.00255503	-0.231306	-0.356141	0.0296517	-0.0681774	-0.0288637	0.0497828	-0.143044	0.321867	0.0379376	0.0554801	0.0333332	0.156625	0.15743	0.0285005	0.0434463	-0.00560563	1	-0.0277983	0.0138811	0.000630886	0.00909072	0.018883	0.000403875	-0.00749695	0.00428249	-0.0050634	-0.00446937	-0.00116972	-0.0201408	-0.0011913	0.00628518	-0.00719717	0.00292705	-0.00426481
SV3	-0.174654	-0.232627	0.00700168	0.221069	-0.0468209	0.0358952	-0.0337322	0.088993	0.156928	-0.099485	-0.0122933	0.0129164	-0.0700946	0.270876	-0.0952252	0.105997	-0.128114	-0.151328	0.0900011	-0.206818	-0.0623472	0.0348661	0.0396715	-0.0551692	0.0561277	0.142345	-0.0807862	-0.201061	0.0865265	0.00692106	-0.0167678	-0.0277983	1	0.0131498	0.00190621	0.00286009	0.0336859	-0.017058	-0.00109725	-0.0133087	-0.0150214	0.0348058	-0.0200655	-0.0147991	-0.0288554	0.00186221	0.0223257	-0.0033865	-0.0238173
SV4	0.0504794	-0.659932	-0.47188	0.376456	0.0808799	-0.163101	-0.14762	-0.200759	-0.0490322	-0.0512252	-0.161115	-0.018411	-0.268652	0.468774	-0.191867	0.0504079	-0.129281	0.0575652	-0.212849	-0.0344804	0.0422956	0.0673204	0.0722402	0.0226248	-0.0503128	-0.0272065	0.0572889	-0.202571	-0.0148846	-0.0433264	0.0139062	0.0138811	0.0131498	1	0.018124	-0.00719879	-0.0189289	0.00815183	-0.0260379	-0.0160316	0.0041628	-0.0176028	-0.0290108	-0.00192434	-8.6435e-06	0.00960276	0.00802317	-0.0133253	0.00774762
SV5	0.028083	-0.151391	0.129282	-0.131781	0.0126088	0.125952	0.00795007	0.00823814	-0.092816	-0.165412	-0.0991265	0.226545	-0.0129701	0.0933354	-0.101785	-0.111592	-0.109946	-0.100118	-0.0062607	0.0874601	-0.157815	0.0468643	0.213145	0.00139975	0.0301806	-0.103338	-0.028104	-0.0436819	0.0519844	0.077602	-0.0099087	0.000630886	0.00190621	0.018124	1	0.00760809	0.00283379	-0.00459155	0.00678648	-0.00614124	-0.00500194	0.0043027	0.00586857	0.00261033	-0.00440929	-0.00641635	0.001422	0.00355815	-0.00382812
SV6	-0.0413569	0.138405	-0.0357125	-0.0441565	-0.00489897	0.198367	0.0252036	-0.00415088	0.0589745	-0.104055	-0.0192482	0.00762364	-0.212959	-0.126477	0.502335	-0.0904311	0.187443	-0.0567029	0.00384266	0.0121326	-0.101621	0.136314	-0.0358984	-0.00878633	-0.0531966	0.08078	-0.0140576	-0.0101843	0.0393801	0.0282271	0.00620625	0.00909072	0.00286009	-0.00719879	0.00760809	1	-0.00666173	0.00232486	0.00609954	0.00593781	0.0072455	0.00821511	0.00300468	0.00757474	0.000227789	0.000511861	0.0053539	-0.000971611	-0.00097873
SV7	-0.0631968	0.16886	0.0451616	-0.101447	0.0753061	-0.077328	0.486495	-0.117854	-0.00241367	-0.0653912	-0.0380094	-0.0548019	-0.019457	0.0380741	0.00216587	-0.0515852	-0.111258	-0.0863432	-0.118726	-0.0372382	-0.0498243	-0.144994	-0.0871043	0.0501886	-0.0629155	0.0351881	-0.0756921	0.120973	-0.0394521	0.0617951	0.00550014	0.018883	0.0336859	-0.0189289	0.00283379	-0.00666173	1	0.00178994	-0.000407349	-0.00429033	0.00249758	-0.00741501	-0.0024092	0.0139732	0.00668442	-0.00459079	0.0010612	-0.00445156	0.00870871
SV8	0.00432117	0.248211	0.288361	-0.146395	0.0935929	-0.0355679	0.212189	-0.0119805	-0.0565142	0.0620898	-0.0480164	0.00255068	0.00219322	0.0333435	-0.100681	-0.0598371	-0.231813	-0.00491165	-0.0264736	-0.0859104	0.0514122	-0.178682	-0.126193	-0.0477204	-0.0506707	0.0706645	0.0077093	0.0881355	-0.0511967	-0.183321	-0.00588284	0.000403875	-0.017058	0.00815183	-0.00459155	0.00232486	0.00178994	1	0.000898319	-0.010028	-0.00980116	0.00307527	-0.00663064	0.00673217	-0.00383386	-0.00759874	0.00129477	-0.00300666	0.000351128
SV9	0.0221606	-0.168761	0.00240413	0.0275574	0.0858724	0.0147571	0.0547698	0.00462146	0.073905	0.0431232	0.0294089	0.135838	0.0287918	0.101664	-0.190776	0.0128159	-0.140748	0.0984098	-0.00688064	-0.160689	0.123933	-0.0138808	-0.0823674	0.0184928	0.130202	0.110369	0.119256	-0.00159783	0.0690783	0.209557	0.00193594	-0.00749695	-0.00109725	-0.0260379	0.00678648	0.00609954	-0.000407349	0.000898319	1	-0.0110319	-0.00735666	-0.0211872	-0.0191137	-0.0107878	0.00382866	0.00454246	-0.00607282	-0.00625772	0.00829978
SV10	0.171417	-0.0315409	0.140543	0.0400462	-0.0387606	-0.0917146	0.153716	0.137683	-0.170036	0.199424	-0.0794828	-0.0292797	0.149754	0.252684	-0.245178	0.103494	-0.0186507	-0.127095	0.158077	0.0214287	-0.268483	0.0962126	-0.00275856	0.0386739	-0.125007	-0.121297	0.0554852	0.0386898	-0.0968625	0.107875	-0.00695303	0.00428249	-0.0133087	-0.0160316	-0.00614124	0.00593781	-0.00429033	-0.010028	-0.0110319	1	-0.0140269	-0.00602683	-0.0202391	0.00516244	-0.00598302	-0.00590026	0.00531981	-0.00784171	0.00381672
SV11	-0.0383327	0.0211135	-0.0543106	0.0418531	-0.0868303	-0.0774065	0.393021	0.0401533	-0.0389197	-0.106358	-0.0535171	0.0319129	-0.0202785	0.113402	-0.123479	-0.104304	-0.0127649	-0.0301793	0.0756489	-0.00968804	-0.154539	0.165167	-0.12845	0.0835993	-0.062826	-0.0992274	0.123463	0.00429239	-0.0856009	-0.101132	-0.00829471	-0.0050634	-0.0150214	0.0041628	-0.00500194	0.0072455	0.00249758	-0.00980116	-0.00735666	-0.0140269	1	-0.00789887	-0.0119533	0.000752503	-0.000805913	-0.00737884	-0.00373978	-0.00455499	0.00374915
SV12	-0.0708921	-0.130404	-0.0155632	0.164233	0.244332	0.172997	0.129948	-0.114185	0.00082055	-0.0629906	-0.0424587	0.0820977	0.170103	0.00924095	0.257611	0.153476	0.04947	-0.343295	-0.109972	-0.135681	-0.316266	0.39775	0.0297324	0.0244262	-0.00256243	0.0403721	0.0582915	0.0172407	0.130835	-0.170853	0.00324967	-0.00446937	0.0348058	-0.0176028	0.0043027	0.00821511	-0.00741501	0.00307527	-0.0211872	-0.00602683	-0.00789887	1	-0.0115643	-0.00739038	0.0154194	0.000225145	-0.019117	-0.00494967	0.0168547
SV13	0.12111	0.236264	0.039009	-0.284253	0.0372894	0.0849217	0.318461	0.139558	0.266899	0.0492614	-0.0589589	0.0792299	0.0426277	-0.0831325	0.124571	0.0178064	0.0461944	-0.174152	0.187451	0.096011	-0.276728	0.0355248	0.00250522	0.0477744	0.0770239	0.117882	0.0790328	-0.0546942	-0.0862231	0.0854028	-0.000543888	-0.00116972	-0.0200655	-0.0290108	0.00586857	0.00300468	-0.0024092	-0.00663064	-0.0191137	-0.0202391	-0.0119533	-0.0115643	1	-0.00141716	-0.0027779	-0.000982958	0.00232165	-0.0100633	0.00613891
SV14	-0.15079	0.170838	-0.09661	0.0658264	-0.123189	0.0978216	0.0457982	0.160792	-0.247656	0.0508364	0.117593	0.0247258	-0.0395139	-0.176681	0.00824989	0.00363918	0.0457128	0.0333688	0.172409	-0.308787	0.322234	-0.025343	-0.0071109	0.0223031	0.13005	0.196571	-0.0916431	-0.0264467	-0.102009	0.209087	-0.00184959	-0.0201408	-0.0147991	-0.00192434	0.00261033	0.00757474	0.0139732	0.00673217	-0.0107878	0.00516244	0.000752503	-0.00739038	-0.00141716	1	-0.000446871	0.010989	-0.00455012	0.00300269	-0.00407057
SV15	0.101863	-0.00419939	-0.0463359	0.112708	0.171175	-0.0980989	0.0442046	0.0724299	-0.0954578	-0.113269	-0.12526	0.146521	0.092284	-0.0955294	0.226378	0.00464233	0.00101647	-0.259922	0.0388311	0.127935	-0.172169	0.0152831	0.134598	-0.188286	0.179917	0.0886263	0.152143	-0.0217368	-0.177406	-0.0478088	-0.00480814	-0.0011913	-0.0288554	-8.6435e-06	-0.00440929	0.000227789	0.00668442	-0.00383386	0.00382866	-0.00598302	-0.000805913	0.0154194	-0.0027779	-0.000446871	1	0.00168733	0.011608	-3.98779e-06	-0.00975032
SV16	-0.240631	-0.0377522	-0.129783	-0.117545	-0.0704765	-0.151322	0.185639	-0.0307482	0.0727302	0.0354407	-0.0225968	-0.20772	0.167129	-0.0780878	-0.115225	-0.0498683	0.0108063	-0.0298858	-0.0231911	0.08161	-0.453283	0.204364	-0.00817654	-0.0328791	-0.0092483	-0.0524047	-0.0288953	0.0561158	0.0650647	-0.00011767	-0.0046846	0.00628518	0.00186221	0.00960276	-0.00641635	0.000511861	-0.00459079	-0.00759874	0.00454246	-0.00590026	-0.00737884	0.000225145	-0.000982958	0.010989	0.00168733	1	-0.00147746	-0.00163043	0.00260578
SV17	-0.0168429	-0.179726	-0.151663	0.135038	0.166563	-0.0715288	-0.183651	-0.0343883	0.0287521	-0.0349603	0.0113603	0.117926	0.0678641	0.187284	-0.0543732	-0.0641339	0.176723	0.140948	-0.0471023	0.15759	0.102792	0.168758	-0.0311567	0.0882174	0.0150648	-0.163214	-0.143435	-0.0129161	0.18553	0.0498096	0.00185574	-0.00719717	0.0223257	0.00802317	0.001422	0.0053539	0.0010612	0.00129477	-0.00607282	0.00531981	-0.00373978	-0.019117	0.00232165	-0.00455012	0.011608	-0.00147746	1	0.000498901	0.00885545
SV18	-0.0180839	-0.0128588	-0.09756	0.02037	-0.0765148	0.0962873	-0.0542062	-0.116633	0.000979443	0.175518	0.0357162	-0.0702877	-0.0255662	-0.0141701	0.13178	-0.047064	-0.0626893	0.256206	-0.134834	0.129156	-0.223031	0.208621	-0.0604879	0.0842451	-0.0439602	-0.0751985	0.0930581	0.0331591	-0.118174	-0.0509443	0.000500682	0.00292705	-0.0033865	-0.0133253	0.00355815	-0.000971611	-0.00445156	-0.00300666	-0.00625772	-0.00784171	-0.00455499	-0.00494967	-0.0100633	0.00300269	-3.98779e-06	-0.00163043	0.000498901	1	0.0034271
SV19	-0.043545	0.0226154	0.0845771	0.0306291	0.170479	-0.218236	0.0449151	0.0142292	-0.106553	0.0828902	0.139174	-0.0639304	0.0917194	0.0476816	-0.154287	0.184285	0.0986295	0.0136396	0.0198853	0.0872213	0.0810093	-0.142775	-0.146649	0.0746792	0.0250281	0.0339223	0.0754652	-0.00441162	-0.0333789	0.078598	-0.00434668	-0.00426481	-0.0238173	0.00774762	-0.00382812	-0.00097873	0.00870871	0.000351128	0.00829978	0.00381672	0.00374915	0.0168547	0.00613891	-0.00407057	-0.00975032	0.00260578	0.00885545	0.0034271	1
SV20	0.104882	0.170382	0.405612	-0.0824614	-0.299388	0.0733854	0.0725862	0.0107003	0.110519	0.110938	0.0804796	-0.00218322	-0.0246016	-0.0345891	0.138099	-0.0834226	-0.00919438	0.0641459	0.035457	-0.0171794	0.026811	-0.00116213	0.173129	0.00594014	-0.121562	-0.00167164	0.0293234	-0.0364463	-0.115072	0.00921467	0.0086953	0.0145926	0.0191898	-0.0262151	0.00754167	-0.0100777	-0.0134084	0.0081202	0.00137996	0.00298106	0.01171	0.0034191	0.0010097	0.00551603	0.000110312	0.00564606	0.00861486	-0.00187116	-0.000138376
SV21	0.0210006	-0.0771627	-0.0806811	-0.0868276	-0.0441656	-0.205798	-0.257344	-0.00312747	-0.00727434	-0.0565104	-0.0577272	0.034337	0.28734	-0.108099	0.00593952	0.0490838	-0.0394184	-0.0123172	0.00272639	-0.143145	-0.0822527	-0.0905019	0.238077	0.0499223	0.0225064	-0.2563	0.167524	0.0401691	-0.051978	0.0261485	-0.00435726	-0.000647668	-0.0266323	0.0139031	-0.00594573	-0.00245857	0.0086193	-0.0016085	0.0134327	0.00343237	0.00477262	0.0240227	0.0083923	0.000866763	-0.012203	0.0012414	0.0128382	0.00459796	-0.0134632
SV22	0.020016	0.194743	-0.154352	0.147807	0.111882	0.184529	0.367162	0.0400059	-0.24557	0.273223	0.1984	-0.00857619	-0.119541	-0.195546	-0.00433255	0.0117331	0.15795	0.0451454	0.045168	-0.114421	-0.16775	0.194628	0.0991552	0.112595	-0.105041	-0.0894714	0.151744	-0.116154	0.073823	-0.0164734	-0.00176308	0.0043583	-0.011233	-0.00484757	-0.00220456	-0.000935403	-0.00113582	-0.00316502	0.000900454	-0.00721168	-0.00139073	0.00709439	-0.00476353	0.00403228	-0.00594193	-0.00105058	0.00820743	-0.00156102	-0.00239449
SV23	-0.0482787	-0.086712	0.127056	0.129897	0.0897032	0.189529	0.111313	0.0352731	-0.0802757	-0.0329618	-0.157434	0.208144	0.0432336	0.133941	-0.0159254	0.124888	-0.0443941	0.0347278	0.0561361	-0.027908	0.175513	-0.0427427	-0.0190638	0.087418	-0.119466	-0.0263778	-0.114421	0.0568946	-0.0147567	0.132362	0.00108601	-0.00818684	0.0179053	0.0246603	-0.00142972	0.002452	0.00587127	0.00515505	0.006304	0.0164282	0.00473116	-0.00404678	0.016574	-0.00591452	0.00813661	0.00178837	-0.0120095	0.0071309	0.000905685
SV24	0.0548156	0.00161094	-0.0411649	-0.0763243	0.0491398	-0.100291	-0.230074	-0.00236802	-0.101652	-0.0306049	-0.0305155	-0.00700622	-0.0547479	-0.0704823	-0.0923742	0.0539186	0.180845	0.0868821	-0.0311403	0.0966296	0.055362	0.0251833	0.0694007	0.0230017	-0.0927126	-0.0110454	0.0914177	-0.134809	0.0329692	-0.116597	-0.0159791	-0.0043522	-0.0316999	0.0122869	-0.0163474	0.0110724	0.0073257	-0.0140188	-0.0017324	-0.0219521	-0.0169177	0.00499584	-0.0111477	0.00201734	-0.0115449	-0.00801363	0.00656804	-0.00250328	-0.00395725
SV25	-0.163681	-0.000601705	-0.0514329	0.196126	-0.0186686	0.0964914	-0.0750321	-0.08361	0.0480496	-0.118807	0.00889502	0.198694	-0.16389	-0.017421	-0.0291033	-0.0372959	0.0380601	0.0118557	-0.0863942	0.150739	0.0777216	-0.0452728	0.0280245	0.0301876	0.0043687	0.0377872	-0.0934325	-0.202382	-0.0621314	-0.0503609	-0.00242019	0.00884737	-0.0234757	-0.0149395	-0.00238946	-0.00658491	-0.00130134	-0.00135377	0.00781405	-0.00511757	0.00437568	0.0210369	-0.00181386	0.00538386	-0.0144287	-0.000108985	0.0176875	-0.00191767	-0.0132382
SV26	0.105011	-0.0729361	-0.170742	-0.0148617	-0.211102	-0.0568785	-0.0275886	-0.0471682	-0.170763	-0.17694	0.0566188	0.0765204	0.0160489	-0.0321219	0.0610804	-0.134786	-0.134245	0.0101285	-0.0621862	-0.121265	-0.0351597	-0.123549	0.0875923	-0.0304896	0.0654118	-0.137686	-0.0482227	0.0210261	-0.101096	0.082464	-0.00378528	-0.00794759	-0.0138325	0.0268333	-0.00606933	0.00123444	0.0122388	0.00221838	0.0126448	0.0112504	0.00623253	0.0164938	0.0155818	-0.00579116	-0.005799	0.0047918	0.00434395	0.00850171	-0.0101684
SV27	-0.0217617	-0.0208207	0.106747	-0.0631107	0.0742147	0.317724	-0.0659363	0.0157652	-0.03793	-0.0288685	-0.0787739	0.0927499	-0.0419798	-0.130708	0.021753	-0.0299254	0.141427	0.0895662	0.0465235	-0.0699948	0.0681182	-0.282344	-0.0988102	-0.203407	0.00553508	0.05327	0.0363831	0.0578138	0.0624298	0.0782115	0.000311886	-0.00218054	0.0100645	-0.00520996	-0.000637438	0.00181953	-0.000433846	0.00594811	-0.00275258	0.00275653	0.00378212	-0.00426874	0.00278598	-0.0069175	0.0014801	0.00498202	-0.000501046	0.00189204	-0.000630556
SV28	-0.0170943	0.00892212	-0.222511	0.0777354	0.166103	0.167091	0.0911681	-0.143242	0.182612	0.129733	-0.0547824	-0.0197577	0.210653	-0.0194703	0.107752	-0.072238	0.138959	0.055274	-0.162241	0.175605	0.200467	0.0820321	0.156427	-0.0174511	-0.0535589	-0.011246	-0.02934	-0.159636	-0.11226	-0.142586	0.00765652	0.0137259	0.0189837	-0.00677995	0.00655553	-0.00884155	-0.0119313	0.000207501	0.00450465	0.00279915	0.00431207	0.000506503	0.00148235	0.013438	0.00486963	-0.00302406	3.0258e-05	-0.00251525	0.00570903
SV29	0.00994546	0.038133	-0.0396002	0.147129	0.131568	0.0211041	0.255407	0.0181571	0.151922	0.150302	0.12261	-0.057103	0.11016	-0.126861	0.136733	0.0554714	-0.0859469	-0.00759519	-0.00838868	0.00665494	-0.0108268	-0.0258339	0.121641	-0.11144	-0.00496114	-0.127887	-0.160028	0.0821225	0.0809617	0.14386	-0.00146148	-0.0104125	-0.00790586	0.0230298	-0.00163195	0.00217479	0.0110431	0.00169237	0.00636813	0.0112252	0.00289703	0.00575985	0.0110845	-0.00691058	0.00010814	0.00298025	-0.00354935	0.00617042	-0.00434233
SV30	-0.166939	0.0660028	0.00293845	0.0682566	-0.0390423	-0.0094413	-0.160105	-0.0608766	0.0664829	0.0176507	0.133367	-0.0702395	-0.19099	0.014753	0.00737995	0.0155267	-0.147062	0.091149	-0.0806573	0.157578	-0.171934	0.0906806	-0.00434305	-0.207267	0.0898027	-0.111709	-0.113124	0.113324	-0.0385921	0.0598166	-0.00443191	0.00803218	-0.0330899	-0.0108618	-0.00491162	-0.00535746	0.0012978	-0.00398416	0.00871529	-0.00793713	0.00235575	0.0249777	-0.00340682	0.00604279	-0.017119	-0.00207585	0.0205067	-0.0014548	-0.0146331
SV31	-0.087914	-0.281993	0.0102013	-0.234307	0.106924	0.0158374	-0.137072	-0.0857754	-0.0225974	-0.0292584	0.209845	-0.0910928	-0.112565	0.0151509	-0.0454482	-0.00704133	0.00476176	0.021797	-0.0916956	-0.00600857	0.00464487	-0.0851239	0.00530786	-0.0602945	0.0501117	-0.0807134	-0.165947	0.00471493	-0.0760883	-0.0848638	0.00347343	0.00504348	-0.0130492	-0.0138469	0.00546021	-0.00688121	-0.00158487	0.00139566	0.00229754	0.0002328	0.0054416	0.0111002	-0.00253348	0.0023	-0.00630077	0.00342161	0.00999254	-0.0017259	-0.00543339
SV32	0.123411	0.17115	0.0472244	-0.0212845	0.0548698	0.14794	-0.0877625	-0.00682199	-0.0249309	-0.0857711	-0.137413	-0.0799746	-0.0143027	-0.0310984	0.163487	0.264418	0.0312474	0.104108	0.0152132	0.0236784	-0.0334472	-0.0757175	-0.111986	0.00818203	0.00348986	0.00645011	-0.0029609	0.0212534	0.109146	0.0585766	-0.00606838	-0.0153054	-0.011535	0.0227612	-0.00566996	0.00829074	0.0135125	0.000293837	0.000334653	0.00415747	-0.00228446	0.0001545	0.006213	-0.0120154	-0.0012073	0.00485741	-0.00414314	0.00547393	-0.00323756
SV33	-0.0539116	0.0363282	0.188207	-0.140786	-0.018222	-0.110639	0.0260456	0.111982	-0.0850715	0.0512962	0.0784139	-0.0704855	0.0119032	0.0279195	-0.128486	0.0683023	0.0296158	-0.0822887	0.096873	-0.102846	-0.0330101	-0.09289	-0.0311158	0.000421641	-0.130095	-0.107758	0.0926351	-0.0559129	-0.107519	0.085109	-0.00500752	-0.000492664	-0.0213676	-0.00155046	-0.00441255	0.000251281	0.00369107	-0.00176558	0.00264385	-0.00473226	-0.000410461	0.0114773	-0.0019521	-0.00144851	-0.00886444	-0.00019368	0.0103979	0.000404128	-0.00797839
SV34	-0.00775596	-0.0620513	-0.213266	-0.0155715	-0.284576	0.0761315	-0.163245	0.187634	-0.14826	0.0125762	-0.153171	-0.0504596	0.0857082	-0.118888	0.126665	-0.0479658	0.104536	0.0791286	0.232127	0.153012	0.0634698	-0.0623557	-0.16144	0.191032	-0.0006122	-0.136776	-0.0644954	-0.0944754	0.147043	0.0725716	-0.00852954	-0.0109425	-0.0170368	0.00931381	-0.00785238	0.00863361	0.0100289	-0.00307215	-0.00293029	-0.0054187	-0.00654734	-0.000373999	-0.00195757	-0.00875461	-0.00512818	0.00111309	-0.00065698	0.00126465	-0.00439641
SV35	0.0909568	-0.00556438	-0.0659032	0.19846	0.0682583	0.00239329	-0.308502	-0.0485659	0.180466	-0.109999	-0.0350507	0.175803	-0.134472	0.00804356	-0.119509	-0.0928397	-0.160549	-0.0915785	-0.0225622	-0.205838	-0.0717765	0.303439	0.211351	-0.0214795	-0.116297	-0.0676796	-0.0112281	0.00177559	-0.0293918	-0.0112058	-0.00315393	-0.00769544	-0.0234325	0.0220604	-0.0037682	-0.00056068	0.0128135	0.00159767	0.0119388	0.0100477	0.00642356	0.0198791	0.0123896	-0.0057306	-0.00802819	0.00482044	0.00784205	0.00744248	-0.0117294
SV36	0.0577125	0.150597	0.0384564	-0.125756	0.125549	0.154013	-0.131335	-0.103373	-0.0709736	-0.0958553	-0.0215983	0.0749207	-0.0602626	-0.201329	0.12205	0.058442	0.156291	-0.104556	-0.0766992	-0.0914705	-0.0180058	-0.0244908	0.050849	-0.038128	0.270774	-0.0638693	-0.0098957	0.0409768	-0.0687272	0.0901726	0.00968207	0.0186094	0.0159441	-0.023701	0.00893035	-0.0122131	-0.0154113	0.00272173	0.00308487	-5.59887e-05	0.00815967	0.00476618	-0.00220204	0.0136349	0.000365263	0.000683363	0.00767704	-0.00437797	0.00256978
SV37	-0.0348737	0.0851724	-0.0704761	0.159496	-0.238727	0.0251919	-0.0404746	-0.0680042	0.163146	0.0518613	-0.160936	-0.0707982	0.0407696	0.066543	0.0156869	-0.0755543	0.00416369	0.168929	-0.0900445	0.0353556	-0.0275285	-0.0826845	-0.0162034	0.075056	0.151082	-0.146829	0.00920085	0.0215895	-0.0677307	0.167663	0.00372581	-0.000371906	0.0163518	-0.0151872	0.00371718	0.00264639	-0.00415983	0.00189699	-0.0109986	-0.00356842	-0.00240337	-0.0162077	-0.00735807	-0.00282207	0.00591972	0.00139949	-0.00804709	-0.0033657	0.00748039
[truncated: 18 more columns]

## Sheet: DNAm pval
	treatment	crs	atopy	asthma	steroid	smoking	sex	sample_well	plate	rv.harvest	initial_culture_days	cryo_days	exp_culture_days_RV	collection_method	age	DNA_concentration	surgeon	batch	chip_position	chip	PC1	PC2	PC3	PC4	PC5	PC6	PC7	PC8	PC9	PC10	SV1	SV2	SV3	SV4	SV5	SV6	SV7	SV8	SV9	SV10	SV11	SV12	SV13	SV14	SV15	SV16	SV17	SV18	SV19
treatment	0	0	0	0	0	0	0	0	0	0	0	0	0	0	0	0	0	0	0	0	0	0	0	0	0	0	0	0	0	0	0	0	0	0	0	0	0	0	0	0	0	0	0	0	0	0	0	0	0
crs	NA	0	0	0	0	0	0	0	0	0	0	0	0	0	0	0	0	0	0	0	0	0	0	0	0	0	0	0	0	0	0	0	0	0	0	0	0	0	0	0	0	0	0	0	0	0	0	0	0
atopy	NA	NA	0	0	0	0	0	0	0	0	0	0	0	0	0	0	0	0	0	0	0	0	0	0	0	0	0	0	0	0	0	0	0	0	0	0	0	0	0	0	0	0	0	0	0	0	0	0	0
asthma	NA	NA	NA	0	0	0	0	0	0	0	0	0	0	0	0	0	0	0	0	0	0	0	0	0	0	0	0	0	0	0	0	0	0	0	0	0	0	0	0	0	0	0	0	0	0	0	0	0	0
steroid	1	0.0135595	0.00433465	0.000680149	0	0	0	0	0	0	0	0	0	0	0	0	0	0	0	0	0	0	0	0	0	0	0	0	0	0	0	0	0	0	0	0	0	0	0	0	0	0	0	0	0	0	0	0	0
smoking	0.997236	0.487673	0.8089	0.131567	0.0191712	0	0	0	0	0	0	0	0	0	0	0	0	0	0	0	0	0	0	0	0	0	0	0	0	0	0	0	0	0	0	0	0	0	0	0	0	0	0	0	0	0	0	0	0
sex	NA	NA	NA	NA	0.169951	0.137347	0	0	0	0	0	0	0	0	0	0	0	0	0	0	0	0	0	0	0	0	0	0	0	0	0	0	0	0	0	0	0	0	0	0	0	0	0	0	0	0	0	0	0
sample_well	0.0201961	0.031418	0.00164014	0.00415242	1	0.0799483	0.0286105	0	0	0	0	0	0	0	0	0	0	0	0	0	0	0	0	0	0	0	0	0	0	0	0	0	0	0	0	0	0	0	0	0	0	0	0	0	0	0	0	0	0
plate	0.30047	0.787061	0.928195	0.8559	0.674486	0.246702	0.249803	1	0	0	0	0	0	0	0	0	0	0	0	0	0	0	0	0	0	0	0	0	0	0	0	0	0	0	0	0	0	0	0	0	0	0	0	0	0	0	0	0	0
rv.harvest	1	4.66204e-08	6.11798e-07	5.85992e-06	0.000293972	9.82984e-06	0.0073341	1	0.476708	0	0	0	0	0	0	0	0	0	0	0	0	0	0	0	0	0	0	0	0	0	0	0	0	0	0	0	0	0	0	0	0	0	0	0	0	0	0	0	0
initial_culture_days	1.62959e-50	3.68875e-53	8.82905e-53	3.17517e-52	7.86742e-69	2.66136e-51	5.67332e-52	3.89436e-16	7.91514e-50	2.54003e-55	0	0	0	0	0	0	0	0	0	0	0	0	0	0	0	0	0	0	0	0	0	0	0	0	0	0	0	0	0	0	0	0	0	0	0	0	0	0	0
cryo_days	0.572237	0.556715	0.00041807	0.112313	5.91169e-22	0.356237	0.187758	4.68765e-05	0.404689	1.90782e-33	1.07298e-47	0	0	0	0	0	0	0	0	0	0	0	0	0	0	0	0	0	0	0	0	0	0	0	0	0	0	0	0	0	0	0	0	0	0	0	0	0	0
exp_culture_days_RV	7.04643e-30	2.8606e-30	6.11617e-30	3.05114e-30	7.46544e-49	2.74591e-29	4.62877e-30	9.06593e-11	5.76341e-28	3.01635e-67	8.77731e-77	7.34727e-27	0	0	0	0	0	0	0	0	0	0	0	0	0	0	0	0	0	0	0	0	0	0	0	0	0	0	0	0	0	0	0	0	0	0	0	0	0
collection_method	NA	NA	NA	NA	0.00163203	0.135407	NA	0.00990337	0.656188	5.45236e-05	3.20129e-53	0.0299787	1.91386e-30	0	0	0	0	0	0	0	0	0	0	0	0	0	0	0	0	0	0	0	0	0	0	0	0	0	0	0	0	0	0	0	0	0	0	0	0
age	0.0755483	0.0336628	0.00302335	0.00205662	4.63305e-21	0.0133816	0.021143	1.3006e-05	0.104811	4.10052e-23	4.68899e-49	0.000388309	2.47418e-27	0.0443967	0	0	0	0	0	0	0	0	0	0	0	0	0	0	0	0	0	0	0	0	0	0	0	0	0	0	0	0	0	0	0	0	0	0	0
DNA_concentration	0.0809631	0.0010568	0.0436461	0.0196752	2.04956e-23	0.0351618	0.00126	0.00087951	0.0442503	3.23007e-27	4.64725e-49	0.000103127	1.37586e-31	0.015977	0.000448463	0	0	0	0	0	0	0	0	0	0	0	0	0	0	0	0	0	0	0	0	0	0	0	0	0	0	0	0	0	0	0	0	0	0
surgeon	1	2.66138e-06	1.94892e-06	0.0210984	3.38031e-05	0.244611	0.840213	0.974212	0.192635	4.57277e-06	8.75951e-48	0.0113727	8.29209e-27	0.0174695	0.00820214	0.000812301	0	0	0	0	0	0	0	0	0	0	0	0	0	0	0	0	0	0	0	0	0	0	0	0	0	0	0	0	0	0	0	0	0
batch	1	0.721046	0.569105	0.0382687	0.000102283	0.0185886	0.00969557	1	0.318404	3.97937e-64	5.91046e-62	1.56e-22	6.38584e-45	0.196321	4.10326e-17	6.08985e-23	0.00546147	0	0	0	0	0	0	0	0	0	0	0	0	0	0	0	0	0	0	0	0	0	0	0	0	0	0	0	0	0	0	0	0
chip_position	0.04349	0.486852	0.533491	0.386217	0.0447207	0.197361	0.410207	0	0.00169616	0.593753	6.09668e-55	7.68102e-08	6.33989e-33	0.933132	6.21036e-11	1.58662e-09	0.529428	0.682236	0	0	0	0	0	0	0	0	0	0	0	0	0	0	0	0	0	0	0	0	0	0	0	0	0	0	0	0	0	0	0
chip	0.568766	0.328238	0.46748	0.789667	0.539028	0.00251536	0.38194	0.0627765	3.93969e-10	0.501083	6.5636e-48	0.355167	2.68952e-25	0.118387	0.153884	0.33926	0.714667	0.896838	0.9967	0	0	0	0	0	0	0	0	0	0	0	0	0	0	0	0	0	0	0	0	0	0	0	0	0	0	0	0	0	0
PC1	7.42402e-57	4.02862e-60	7.69073e-60	7.86413e-59	1.44829e-74	1.8491e-57	8.94612e-58	4.25324e-19	5.08894e-55	1.11727e-63	1.09563e-103	2.49337e-53	2.40293e-84	7.83762e-59	6.70261e-57	5.96101e-57	1.78181e-54	2.19946e-73	7.07566e-62	1.13146e-53	0	0	0	0	0	0	0	0	0	0	0	0	0	0	0	0	0	0	0	0	0	0	0	0	0	0	0	0	0
PC2	0.00025187	0.000232066	0.000142786	0.000197695	3.35028e-24	4.75886e-07	1.60835e-05	1.06915e-05	0.00168166	1.82426e-23	2.35901e-53	0.000110472	4.1836e-32	0.000162579	7.56598e-10	0.000229311	3.1278e-06	5.4452e-22	1.59354e-12	6.53754e-05	6.66992e-64	0	0	0	0	0	0	0	0	0	0	0	0	0	0	0	0	0	0	0	0	0	0	0	0	0	0	0	0
PC3	0.715364	0.277347	0.588938	0.554701	8.73828e-20	0.593616	0.569407	1.51402e-05	0.385457	1.5847e-23	2.39182e-47	0.184282	2.13728e-27	0.207427	0.00143481	0.000922155	0.00292812	2.11168e-15	3.69564e-11	0.0796168	3.63486e-53	6.00932e-07	0	0	0	0	0	0	0	0	0	0	0	0	0	0	0	0	0	0	0	0	0	0	0	0	0	0	0
PC4	0.9483	0.242812	0.257716	0.275553	6.21935e-21	0.605496	0.58297	0.000299422	0.880303	3.66186e-25	9.98018e-47	0.154786	4.35716e-26	0.220614	0.0729054	0.0211832	0.0240167	3.6888e-13	6.51129e-08	0.807557	9.00126e-56	0.00074217	0.00890252	0	0	0	0	0	0	0	0	0	0	0	0	0	0	0	0	0	0	0	0	0	0	0	0	0	0
PC5	0.822694	0.637911	0.192908	0.133376	5.10133e-20	0.118807	0.585664	2.01898e-05	0.802805	1.53445e-17	3.57103e-48	0.0472759	1.66598e-26	0.734778	0.172456	0.0170217	0.14734	1.08864e-13	3.95639e-08	0.825024	1.86964e-56	0.00278443	0.570903	0.184	0	0	0	0	0	0	0	0	0	0	0	0	0	0	0	0	0	0	0	0	0	0	0	0	0
PC6	0.761644	0.158322	0.505678	0.485113	5.49894e-19	0.409454	0.0944863	2.31918e-06	0.505436	9.46432e-25	1.40129e-52	0.000150422	6.0628e-26	0.00160227	0.000721952	0.00639909	0.0137573	1.69124e-17	1.5087e-07	0.154969	4.3346e-56	0.000143303	0.00507197	0.216608	0.256609	0	0	0	0	0	0	0	0	0	0	0	0	0	0	0	0	0	0	0	0	0	0	0	0
PC7	0.971047	0.385455	0.631093	0.842772	3.3858e-19	0.149872	0.151593	0.000335212	0.652194	7.84717e-24	3.55387e-47	0.0128102	2.96884e-29	0.479143	3.5025e-05	0.0105242	0.000374835	6.85918e-19	1.0033e-07	0.261718	3.46155e-55	3.50027e-05	0.000347596	0.127521	0.0142216	0.106521	0	0	0	0	0	0	0	0	0	0	0	0	0	0	0	0	0	0	0	0	0	0	0
PC8	0.982874	0.0766197	0.833945	0.689886	2.99715e-19	0.0116583	0.0529231	2.3176e-05	0.809524	4.69e-22	7.54966e-49	0.018366	1.4777e-26	0.11411	0.000222996	0.00712571	0.208749	1.0119e-16	6.84087e-09	0.847832	1.18599e-53	3.4324e-07	0.822132	0.389277	0.00419105	0.200501	0.192437	0	0	0	0	0	0	0	0	0	0	0	0	0	0	0	0	0	0	0	0	0	0
PC9	0.822694	0.143062	0.261465	0.590075	2.12878e-22	0.00173592	0.0165227	7.22055e-06	0.0906517	1.06413e-21	3.33999e-49	0.0178741	2.81624e-26	0.715684	0.0583784	7.45447e-05	0.00013001	5.41466e-16	5.2355e-08	0.0304183	1.62607e-54	3.15262e-07	0.859426	0.507702	0.208747	0.589842	0.00045053	0.023787	0	0	0	0	0	0	0	0	0	0	0	0	0	0	0	0	0	0	0	0	0
PC10	0.400083	0.297014	0.0194155	0.290606	1.41804e-20	0.367121	0.0603229	0.00047869	0.016139	1.22963e-24	2.36598e-48	0.0672486	2.84982e-28	0.204375	0.0619933	0.00063582	0.000337773	8.70359e-18	8.52169e-10	0.604841	9.30383e-55	2.43668e-07	0.0036407	0.0335995	0.19907	0.0574718	0.199628	0.0133307	0.0386606	0	0	0	0	0	0	0	0	0	0	0	0	0	0	0	0	0	0	0	0
SV1	0.063838	0.264181	0.305232	0.215816	7.53194e-21	0.0448931	0.0255273	2.23975e-05	0.116134	1.49864e-17	3.40092e-50	0.000503927	1.32734e-26	0.246434	0.131515	0.00498243	0.428582	3.92712e-16	4.72069e-10	0.598962	1.10246e-53	0.00297914	0.0366617	0.287783	0.040364	0.349954	0.493485	0.0149854	0.757634	0.204482	0	0	0	0	0	0	0	0	0	0	0	0	0	0	0	0	0	0	0
SV2	0.283551	0.0620223	0.320362	0.0650213	1.26972e-21	0.340524	0.167266	7.32376e-06	0.22149	3.16868e-19	2.49586e-47	0.00232779	2.89236e-26	0.198716	0.128953	0.000705955	0.000242631	1.36518e-14	2.00618e-11	0.337408	1.03625e-52	0.00147938	0.042267	0.0531601	0.0145259	0.375792	0.0783096	0.225117	0.218077	0.0504162	0.0980973	0	0	0	0	0	0	0	0	0	0	0	0	0	0	0	0	0	0
SV3	2.53741e-18	8.64331e-19	3.50546e-18	1.27201e-18	7.63602e-41	1.96996e-16	2.27973e-18	1.2599e-08	5.12699e-22	1.1866e-31	4.41621e-66	1.47402e-22	3.18821e-44	1.37366e-18	5.93529e-17	2.57981e-17	5.00113e-19	5.52106e-33	4.00322e-25	3.4493e-16	1.20101e-71	2.22426e-20	1.00952e-16	3.00782e-15	3.07405e-17	3.19463e-16	1.14763e-14	1.3727e-14	7.99085e-16	1.93919e-16	1.2434e-28	4.25394e-23	0	0	0	0	0	0	0	0	0	0	0	0	0	0	0	0	0
SV4	0.940512	0.86337	0.941273	0.824431	1.33959e-21	0.872553	0.941339	0.00015919	0.366317	4.48613e-20	2.91273e-51	0.00347609	3.39348e-25	0.66968	0.157655	0.0260581	0.128337	2.50049e-14	7.6494e-08	0.883284	7.79724e-53	0.00903811	0.85302	0.774672	0.644425	0.961986	0.987568	0.472535	0.479645	0.160318	0.029092	0.507338	1.09529e-17	0	0	0	0	0	0	0	0	0	0	0	0	0	0	0	0
SV5	0.0701869	0.00412484	0.0553878	0.0759502	6.94692e-22	0.130885	0.0726705	2.51126e-05	0.236509	2.68252e-23	2.15453e-50	0.0126541	1.12794e-28	0.0404265	0.0361443	1.89395e-05	0.0224563	4.555e-17	1.54054e-10	0.221428	7.9939e-56	0.000222724	2.61635e-05	0.173863	0.024881	0.060474	0.00414808	0.0835564	0.134154	0.0183758	0.00802908	1.19521e-11	7.5154e-35	0.0705568	0	0	0	0	0	0	0	0	0	0	0	0	0	0	0
SV6	0.0177064	0.00798336	0.000669091	0.00209812	3.73653e-23	0.000600441	0.00137345	1.58712e-06	0.0426769	7.25053e-23	2.90923e-50	0.000218472	1.20385e-29	0.0174226	0.000670849	7.53192e-05	0.0045437	2.98501e-18	1.32061e-09	0.00924763	1.55661e-55	1.17291e-10	0.02046	0.030269	0.00766023	0.00475851	0.000179726	0.00926194	0.000698521	0.00220162	0.000116847	0.0069555	9.34192e-19	0.0430959	0.00064245	0	0	0	0	0	0	0	0	0	0	0	0	0	0
SV7	2.22923e-05	1.47979e-05	2.23066e-05	2.19837e-05	6.02786e-25	0.000327635	8.43157e-06	1.36224e-06	2.43855e-05	3.72274e-21	1.08818e-51	1.10748e-05	4.23399e-31	6.62294e-06	1.21755e-05	1.03018e-06	3.50229e-07	1.84794e-21	1.12122e-13	0.000728475	7.33487e-58	8.81317e-08	6.05309e-11	0.000213703	0.000387518	0.000757278	0.000247527	3.40496e-07	2.73693e-05	9.86779e-06	4.96616e-13	1.25252e-10	6.9001e-29	4.26617e-05	2.58063e-07	1.46636e-07	0	0	0	0	0	0	0	0	0	0	0	0	0
SV8	0.389857	0.283884	0.386847	0.452963	2.12403e-19	0.0955245	0.414216	0.000124807	0.479477	7.69055e-20	2.93114e-47	0.00559826	6.9844e-26	0.00602161	0.00834668	0.0230238	0.00570493	9.93766e-16	1.03954e-08	0.0825118	2.44985e-54	9.63805e-05	0.17141	0.0101866	0.169717	0.495192	0.544047	0.0126427	0.176299	0.00952392	0.015147	0.00276229	7.69336e-20	0.380129	0.0360745	8.12261e-06	1.3094e-14	0	0	0	0	0	0	0	0	0	0	0	0
SV9	1.03239e-08	6.1736e-11	7.84381e-11	2.96678e-10	1.2251e-28	7.28762e-09	5.08613e-09	6.73807e-08	7.32867e-08	1.92284e-24	2.64327e-55	1.22578e-07	1.01761e-34	4.38975e-10	2.87114e-10	4.23327e-11	6.61722e-10	7.31603e-24	2.66619e-15	9.39968e-07	3.32559e-66	1.20173e-12	4.25936e-07	5.23199e-07	1.05644e-07	4.19579e-07	7.14345e-11	7.61726e-08	2.17026e-08	1.22598e-07	3.62377e-09	1.43601e-07	6.75746e-25	3.23109e-10	4.44786e-09	4.6245e-21	2.16451e-13	4.92794e-14	0	0	0	0	0	0	0	0	0	0	0
SV10	0.482037	0.549994	0.217826	0.446431	2.43554e-20	0.662245	0.335879	0.000291199	0.748707	7.09912e-18	1.15555e-48	0.0843648	1.81882e-26	0.38779	0.0301227	0.0421589	0.00224406	1.49213e-14	3.93245e-09	0.719078	1.26007e-53	0.000171199	0.444278	0.00419488	0.0925397	0.601331	0.126403	0.332587	0.00210392	0.526801	0.482713	0.174826	6.58998e-16	0.563022	0.0965508	0.00514988	1.51381e-05	0.00500108	1.81537e-07	0	0	0	0	0	0	0	0	0	0
SV11	0.0027958	0.00420273	0.00487135	0.00283224	3.06751e-22	0.0103348	0.00401277	6.50735e-06	0.000626125	2.83549e-18	2.29661e-51	0.000125245	7.45929e-29	0.00167509	2.28202e-05	3.32442e-06	0.125967	3.49598e-16	7.77101e-10	0.0107507	1.56592e-55	1.53302e-06	0.012084	0.0498675	0.00357311	0.000813516	0.0349794	0.0313039	0.00682274	0.00112973	0.000283277	1.26814e-05	1.07071e-18	0.00952706	0.00653239	8.09445e-06	1.23506e-05	0.00820295	4.07507e-11	1.9894e-15	0	0	0	0	0	0	0	0	0
SV12	0.0203244	0.026802	0.00210609	0.0198912	3.28004e-22	0.00414074	0.0130115	1.35929e-05	0.00212517	2.09099e-23	2.103e-50	0.00160409	3.24841e-27	0.00110788	0.000103413	0.00669054	0.0197439	5.08377e-17	1.76004e-11	0.0708614	4.68551e-57	2.54953e-07	0.0203623	0.11151	0.0475193	0.00147963	0.0401265	1.08701e-05	0.00416437	1.79211e-05	6.96346e-05	0.000224483	7.93715e-21	0.0157415	0.00109826	1.22614e-06	1.25079e-05	0.00367731	2.72821e-14	0.100065	0.000125282	0	0	0	0	0	0	0	0
SV13	0.0381771	0.000396676	0.00843708	0.000229462	1.39666e-21	0.0602664	0.00763304	5.35719e-05	0.0246248	8.79125e-22	1.07557e-47	0.0069469	9.24935e-28	0.020907	0.0526885	0.000377595	0.10743	3.9282e-17	5.79595e-10	0.00362104	9.09114e-57	7.88874e-07	0.0399498	0.0642176	0.0661749	0.207548	0.232381	0.00189836	0.0105776	0.0238162	5.60132e-05	0.00254939	4.34499e-17	0.0255955	0.0264737	0.000355869	1.3506e-05	0.0166259	7.10299e-11	0.0784549	0.00183422	3.77552e-05	0	0	0	0	0	0	0
SV14	0.000300102	0.00021161	9.98484e-05	0.000102911	1.69047e-23	0.000260319	9.13912e-05	1.41131e-05	0.000201101	9.93488e-19	8.82905e-51	0.00738174	2.04626e-30	0.000180265	0.000203118	3.66966e-05	3.20909e-05	5.17151e-18	8.76177e-11	0.000246133	3.56501e-59	6.42939e-10	0.000266071	0.000413867	0.00011751	0.00134778	0.000432688	6.71123e-05	0.00365933	0.0021091	1.71095e-08	0.000195587	8.61343e-21	0.00136367	0.00036384	2.9562e-07	6.86896e-10	1.64001e-05	5.82799e-11	0.00151602	5.95042e-06	5.29095e-05	9.36555e-05	0	0	0	0	0	0
SV15	0.000254232	5.61168e-06	0.000231135	9.09851e-05	3.62264e-25	1.20477e-05	0.000195774	3.92558e-06	0.00191932	5.99996e-21	1.58488e-51	4.43714e-05	6.14565e-30	1.88899e-05	5.26427e-06	0.000185337	0.000444083	2.13799e-18	4.96028e-13	0.00393684	1.44019e-57	1.81133e-08	0.000608626	0.00429454	4.92176e-11	0.000458958	0.00866182	4.1285e-05	0.00610326	0.000133608	1.61437e-05	4.2989e-05	1.0563e-19	0.00234735	1.04118e-05	5.33952e-05	3.08497e-07	0.00472496	1.89353e-15	0.000905183	6.13203e-06	1.85893e-07	5.48641e-06	5.90081e-09	0	0	0	0	0
SV16	0.00286459	0.00179254	0.00277401	0.00269651	1.53767e-22	0.00883535	0.00466216	8.54548e-07	0.00949953	1.79991e-17	6.81992e-50	0.00950539	1.14245e-28	0.00217082	0.00022261	0.000651756	0.0018645	2.80751e-15	2.2003e-11	0.038128	2.14823e-57	8.67988e-08	0.00541855	0.0920379	1.12069e-05	0.00797056	0.00253158	0.00840628	0.0391144	0.00416648	3.01167e-07	0.000756394	5.44034e-19	0.000607083	5.96948e-05	0.000710994	2.21559e-06	0.0015532	3.09213e-09	0.00133741	0.00113309	2.43297e-05	2.54424e-05	4.15933e-10	9.64969e-07	0	0	0	0
SV17	0.00680169	0.00811529	0.00915885	0.00285044	1.00564e-20	0.0506076	0.0222605	0.000131057	0.0464882	1.93782e-22	5.92494e-48	0.0151521	1.95841e-28	0.0181697	0.00145375	0.000496566	0.00224353	3.09133e-18	3.81238e-09	0.0166771	7.11946e-57	1.3077e-08	0.0100908	0.0235621	0.0660176	0.0200135	0.124344	0.109703	0.00799584	0.0126036	0.00310664	0.000104178	1.38402e-21	0.033251	0.0015101	3.10036e-06	3.55301e-06	0.00142164	1.27852e-11	0.0847087	9.59827e-06	0.00394352	0.00125955	6.50951e-07	9.72413e-05	0.00096083	0	0	0
SV18	0.00432405	0.000165914	0.00179024	0.00297051	6.20688e-22	0.00111967	0.0021952	2.79052e-06	0.021047	1.28559e-21	7.97788e-50	0.00146974	1.97724e-28	0.00128646	0.000585302	0.000195732	0.000735774	1.62606e-19	1.16625e-11	0.000839542	8.888e-56	6.103e-08	6.26527e-05	0.0359298	0.0758517	0.00207882	0.000994764	0.00191765	0.0141392	1.66785e-07	0.000109175	0.0147435	1.63431e-20	0.00787804	0.000395448	4.60743e-05	5.50724e-08	0.00149431	5.82748e-11	0.00836399	0.000139559	0.00094202	0.00395053	1.62371e-07	4.37907e-05	0.00011835	0.000423704	0	0
SV19	6.37747e-05	1.72802e-05	5.52653e-05	4.67637e-05	4.17689e-24	0.000100008	5.38255e-05	4.34673e-06	2.46794e-05	3.92061e-16	7.87448e-53	0.00177481	3.9027e-30	4.74171e-05	3.54522e-06	1.40573e-05	3.31812e-05	2.57211e-17	2.2866e-12	2.45145e-05	7.28285e-59	3.46959e-08	0.000409729	0.00330004	0.00170512	0.000166165	0.000400947	4.43962e-05	6.45563e-05	6.41734e-05	2.64338e-05	0.000348582	1.12159e-19	0.00169461	0.000165262	1.58167e-08	9.2399e-07	1.27738e-05	2.66917e-14	4.48945e-05	2.49506e-09	6.0486e-06	3.21713e-08	4.61774e-08	5.44687e-08	1.8619e-08	2.76944e-07	1.06617e-11	0
SV20	6.67576e-10	6.36432e-10	1.08066e-09	3.56532e-10	6.68158e-34	6.60138e-11	5.19116e-10	1.17228e-06	5.94479e-09	6.2253e-23	3.91451e-58	2.82916e-08	1.98292e-37	4.78324e-10	4.85072e-10	4.39662e-09	7.90238e-10	8.91339e-23	8.16631e-19	1.20437e-08	8.1428e-62	1.77416e-12	3.00825e-10	7.9145e-08	2.92253e-07	2.94457e-08	2.26529e-07	1.16081e-10	1.40265e-08	4.36455e-08	3.00406e-10	2.12151e-10	2.56276e-27	2.7484e-07	4.23697e-10	1.8634e-10	8.09984e-16	9.76206e-10	1.35459e-16	3.76978e-08	9.45924e-11	2.74513e-11	2.72051e-12	3.46642e-15	7.08748e-11	1.5773e-13	3.14539e-10	1.95045e-11	9.9718e-14
SV21	9.73905e-05	0.000142356	0.000262029	9.65098e-05	3.9251e-24	3.1589e-05	0.000140126	1.18782e-05	4.38426e-05	1.91015e-23	5.29219e-50	0.000175309	1.29236e-33	4.90321e-06	4.86319e-08	6.09287e-06	0.00387226	1.16494e-17	3.41267e-12	0.0006807	9.64161e-60	4.04926e-10	3.87187e-07	3.7413e-06	0.00132151	3.14459e-05	0.00113957	1.64884e-06	0.000275674	6.07822e-05	1.58946e-06	6.4531e-05	1.58414e-20	9.22573e-06	0.000219285	7.57236e-09	2.14015e-08	7.06564e-06	9.54598e-15	0.000951966	1.98317e-07	2.02008e-05	4.17853e-05	8.75186e-09	2.33637e-11	3.3588e-05	4.51138e-05	3.4008e-09	1.4311e-08
SV22	0.0542598	0.0321112	0.00315929	0.0213812	9.00547e-21	0.000351355	0.00466526	1.0274e-05	0.062588	7.88626e-16	4.64177e-49	0.255149	7.14706e-27	0.0374813	1.4594e-05	0.00224383	0.00460176	4.52551e-15	1.11991e-11	0.0162272	6.16683e-56	2.30508e-06	0.145477	0.000663701	0.164776	0.171469	0.061151	0.119435	0.03303	0.0542889	5.78691e-06	0.00537194	1.46363e-16	0.110773	0.0140716	0.00072539	1.98342e-05	0.00212268	3.62699e-10	0.0165338	2.77972e-05	0.00752312	0.00261846	3.19194e-06	4.08019e-07	0.00282069	0.000402871	1.69138e-05	1.8366e-07
SV23	0.308458	0.0605372	0.31437	0.0179701	1.49634e-20	0.0489036	0.187227	4.35902e-06	0.385361	6.51399e-21	6.65202e-48	0.0401339	2.1238e-28	0.0381145	0.0719428	0.0162004	0.431877	3.02337e-18	2.66134e-10	0.651565	3.93682e-55	9.44798e-08	0.142738	0.0744796	0.207924	0.0491297	0.270127	0.395324	0.156468	0.197236	0.00996668	0.000725984	1.10677e-16	0.128327	0.014716	0.00582847	1.80591e-05	0.360788	7.37933e-08	0.0724537	0.00106497	0.0501893	6.43419e-06	0.000130735	4.74962e-05	0.00042719	0.0172582	0.00772871	8.68694e-05
SV24	0.0011916	0.000710311	0.00200931	0.000501028	3.06639e-23	0.00253707	0.00190272	9.67652e-05	0.00101469	2.76045e-17	5.18464e-49	0.00109011	3.44565e-28	0.00016253	6.33294e-05	6.35111e-05	0.00538524	9.17144e-15	2.46491e-11	7.50844e-05	4.34528e-57	1.46977e-05	0.00138517	0.0212864	0.000107053	0.0119622	0.0535953	0.008943	0.00973713	0.00162417	0.00040597	0.000270135	1.95767e-21	3.21148e-06	0.000890056	1.61879e-05	6.10627e-07	0.0134297	6.72819e-12	0.0116697	0.000126185	1.4483e-05	6.63623e-05	2.00057e-06	1.47682e-07	0.00103734	0.000276802	6.02264e-05	5.01869e-07
SV25	0.542843	0.275454	0.273848	0.201594	2.25889e-20	0.305511	0.581229	4.47148e-05	0.17662	2.59153e-13	6.47241e-48	0.201453	2.20584e-25	0.110387	0.00227935	0.0924359	0.0534806	3.16069e-15	1.46625e-11	0.744717	1.75279e-52	3.88998e-05	0.312162	0.574022	0.225245	0.171079	0.519241	0.0381009	0.483038	0.502372	0.000719327	0.353333	3.08829e-15	0.58837	0.23328	0.0528952	0.000381548	0.339182	5.29181e-07	0.202059	0.00442659	0.0680206	0.00649858	0.00017737	0.000250417	0.0108736	0.00603723	0.039175	4.71539e-05
SV26	1.78373e-07	1.32201e-07	9.97861e-08	1.47003e-08	8.40296e-26	5.6636e-07	6.96188e-08	1.42352e-07	4.01549e-08	1.68731e-22	5.35086e-60	4.58466e-08	2.39906e-34	9.24226e-08	1.61403e-08	6.22008e-11	2.8551e-06	1.31059e-23	1.63155e-15	1.11587e-07	2.79979e-60	1.07786e-11	3.06032e-06	1.1275e-05	3.78138e-07	6.01062e-06	9.17256e-06	6.57523e-07	8.51033e-07	6.81406e-10	5.341e-10	2.10461e-08	7.51064e-25	2.3774e-07	2.66886e-09	2.78917e-09	2.33199e-13	9.65837e-08	7.70044e-15	7.9925e-06	5.3268e-09	1.33173e-11	2.23828e-07	8.02502e-14	2.51454e-11	3.40161e-11	1.23353e-12	1.1084e-08	2.20899e-09
SV27	1.03818e-07	1.10488e-07	2.70726e-08	6.30408e-08	9.23917e-27	3.08503e-08	1.05828e-09	5.52499e-07	6.81105e-08	5.39462e-19	3.41096e-54	2.30819e-07	2.99918e-33	1.2811e-07	2.13426e-07	2.14136e-10	9.6155e-09	2.73272e-21	1.63347e-18	2.41309e-06	2.87492e-60	5.59799e-13	2.19881e-07	1.48182e-05	1.57877e-06	6.25699e-07	4.42282e-05	6.20663e-07	9.95887e-10	6.55959e-06	1.22852e-10	2.54029e-09	1.59193e-23	1.21925e-06	5.78526e-08	3.23933e-08	2.43342e-11	3.57609e-08	3.40618e-15	3.01546e-06	6.60395e-09	8.82306e-09	2.1542e-07	5.54051e-16	1.21914e-15	3.11638e-09	4.58918e-09	1.32736e-11	3.92149e-12
SV28	0.000330469	6.97768e-05	0.000216976	0.000198784	3.57911e-24	0.000273501	8.03584e-05	3.29622e-06	0.000178535	2.76394e-17	2.52969e-51	1.31836e-05	1.35731e-30	0.000347418	9.13303e-05	2.00616e-05	4.097e-05	6.24085e-21	4.94477e-13	0.000538156	2.92682e-60	3.30737e-07	0.000597659	0.000510326	0.00141191	0.00210875	0.00121471	0.00148693	0.000122765	0.00294443	0.000116526	0.00011679	2.7457e-20	0.00061312	0.00198328	4.62592e-05	1.10328e-06	1.72793e-06	2.40255e-10	0.00071745	2.22852e-06	5.97746e-06	2.30832e-08	4.77499e-08	8.48154e-08	1.33108e-06	3.21359e-07	3.03996e-07	9.92133e-09
SV29	0.0014957	9.27205e-08	3.13281e-06	0.000496956	7.40031e-25	0.00274974	0.000587699	4.03783e-06	0.000945739	1.35726e-22	6.80661e-52	0.00657976	5.10932e-29	4.0561e-06	1.1744e-06	0.000315655	0.00356219	7.24534e-16	2.63609e-10	0.00210617	3.8866e-56	4.44435e-06	0.000325785	0.00036252	0.000470417	1.52014e-05	0.00676874	0.00819739	0.000286019	0.00135307	0.00600165	0.000402658	1.83306e-19	2.49102e-05	1.03727e-06	0.000504084	3.35842e-08	0.00463468	2.35638e-12	0.0092773	1.00834e-07	0.000694798	5.69659e-05	2.26608e-06	1.47731e-08	3.98215e-07	1.73197e-05	4.79388e-05	1.97184e-07
SV30	0.148195	0.0614552	0.0994	0.0813293	3.15909e-21	0.00041903	0.13751	0.00074189	0.0961291	2.82e-16	7.13892e-48	0.0749839	6.39255e-29	0.0183328	0.0216851	0.00402479	0.0210194	3.65053e-14	1.25984e-09	0.136189	2.90149e-57	1.38816e-05	0.115175	0.087625	0.0264882	0.215208	0.646891	0.229941	0.124983	0.0611479	0.0622697	0.0151731	5.1012e-16	0.201762	0.0277003	0.00143631	5.39045e-05	0.0225827	2.41595e-09	0.0360565	0.00188749	2.26644e-05	1.34589e-05	1.67991e-06	1.97488e-06	0.00149104	0.00243658	0.00110503	0.000313349
SV31	1.56389e-06	1.67417e-06	2.07026e-06	3.3101e-07	1.50911e-24	5.27773e-06	9.06285e-07	4.42026e-06	1.03403e-06	2.88559e-19	1.25133e-52	1.13495e-07	5.61289e-32	3.33766e-06	1.73305e-06	1.04777e-05	7.58463e-06	1.46306e-18	2.3057e-14	6.611e-05	3.6906e-60	6.49566e-09	1.84665e-06	4.43001e-05	0.000119836	1.12867e-05	0.000111971	0.000157306	7.424e-06	1.17671e-07	1.9195e-06	1.11614e-07	3.37116e-21	1.00134e-05	2.40301e-08	3.47328e-09	7.13706e-09	2.49714e-05	4.78194e-14	3.12431e-05	2.16081e-09	5.40085e-06	1.62254e-09	3.89526e-09	3.49888e-11	4.10081e-07	1.86216e-07	4.68421e-09	1.10495e-09
SV32	1.28544e-07	2.22949e-07	5.72615e-08	3.91306e-07	5.57436e-27	1.01883e-06	1.13436e-07	8.17791e-08	2.60016e-06	4.66078e-20	9.08431e-56	2.44933e-06	7.72025e-34	1.54248e-07	8.82482e-07	4.26767e-09	6.3036e-06	5.7782e-20	4.72405e-15	7.95417e-05	5.27392e-62	5.10389e-09	7.53978e-06	2.73779e-06	6.2656e-07	1.54617e-05	1.14221e-05	1.9198e-07	2.00528e-06	6.3038e-06	4.5896e-06	3.09541e-06	7.28888e-22	5.4728e-06	2.07157e-08	4.15787e-07	5.60198e-11	7.30119e-05	5.82417e-15	8.3515e-05	7.26159e-08	4.31627e-08	5.00605e-07	5.29327e-11	5.62897e-12	1.75469e-08	5.09998e-07	4.51936e-08	7.5817e-10
SV33	0.0871595	0.057483	0.015381	0.00784415	1.52828e-20	0.000188976	0.00148364	4.43146e-05	0.033004	5.58055e-18	6.46323e-49	0.0384936	5.3981e-30	0.0175081	0.000871998	0.00019718	0.00582211	3.06424e-15	2.70201e-10	0.0360332	9.03381e-58	3.47661e-09	0.0100569	0.111857	0.0520194	0.115722	0.00699839	0.0369289	0.0720774	3.90029e-05	0.0448669	0.029561	4.33592e-19	0.315871	0.000633394	7.06605e-05	5.55367e-05	0.000259078	3.80912e-10	0.0230606	0.00143652	0.000276141	0.0360808	0.000160548	0.000440984	2.39212e-06	0.00391878	6.85925e-05	5.27247e-07
SV34	0.00242078	0.0018518	0.000372681	0.00067342	5.88241e-23	0.00232393	0.00258144	6.57413e-05	0.000597234	5.262e-20	1.92341e-52	0.0060827	1.88338e-30	0.00158527	0.000242273	0.00178255	0.00565294	6.37868e-16	1.16527e-12	0.00180205	1.62934e-55	6.75018e-07	1.20938e-05	0.00205013	9.05211e-05	0.0130495	0.0125457	0.0612564	0.00107796	0.000904649	0.000217142	0.0120978	5.31255e-18	0.0173779	0.0001081	3.6818e-05	1.08347e-06	0.00240962	1.48057e-11	0.00351538	6.17437e-05	0.000737215	0.00231972	1.23133e-06	1.95707e-07	7.6101e-05	4.56805e-05	1.4147e-06	9.16914e-08
SV35	0.114681	0.143153	0.00709256	0.0118867	1.55207e-20	0.105232	0.0601329	0.000107728	0.022907	5.99877e-16	5.4791e-49	0.239845	3.98673e-26	0.0535337	0.00400357	0.0230243	0.0574425	1.66386e-16	1.93984e-11	0.20236	3.28817e-54	8.51827e-07	0.172108	0.46204	0.556852	0.285111	0.542003	0.27647	0.136607	0.0757366	0.200256	0.0424794	4.996e-16	0.0352323	0.0225933	0.00700019	4.49682e-05	0.00447526	1.235e-08	0.200762	0.000199814	0.00269721	0.0149686	1.74749e-05	0.000954102	0.000820201	0.000388948	8.48887e-05	0.000324288
SV36	6.6126e-05	0.00020262	4.35212e-05	6.93506e-06	9.98994e-23	0.000577692	4.20164e-05	4.13344e-06	0.000368611	1.51023e-20	4.95369e-53	0.000912871	8.83021e-31	0.000170923	7.16932e-06	4.51276e-07	0.00102854	3.55261e-19	9.74857e-12	0.00416575	6.32812e-59	7.74678e-08	0.00406026	0.00131405	4.26817e-05	0.00577604	0.00226924	0.000112382	1.65232e-05	0.000492102	3.54428e-07	0.000121065	4.36832e-19	0.000328958	0.000123358	3.58166e-05	4.03251e-07	0.000178949	6.15062e-12	0.000149544	7.05762e-05	9.25432e-05	2.25297e-05	1.7283e-08	3.9232e-10	7.53813e-07	1.12522e-05	3.72376e-07	2.89689e-07
SV37	0.0032833	0.000964381	0.00330936	0.00281424	2.06598e-24	0.00035097	0.000638198	2.97835e-05	0.000328522	1.23337e-21	5.57642e-51	0.000769752	9.6277e-30	0.00244652	0.000818496	4.03939e-05	0.00013536	2.42382e-14	9.15531e-12	0.00213267	8.57597e-55	2.09356e-08	0.0114759	0.009841	7.11201e-05	0.00942471	0.0307399	0.0033233	0.0020679	0.000215218	0.00131001	0.0077332	2.24901e-19	0.0335255	0.000521466	0.001797	1.19166e-05	0.00270678	7.57277e-11	0.0172429	3.09143e-05	0.000625513	0.000124871	1.62199e-05	2.53601e-05	8.70362e-07	0.000164172	1.45426e-05	1.72881e-06
[truncated: 18 more columns]

## Sheet: DNAm test
	treatment	crs	atopy	asthma	steroid	smoking	sex	sample_well	plate	rv.harvest	initial_culture_days	cryo_days	exp_culture_days_RV	collection_method	age	DNA_concentration	surgeon	batch	chip_position	chip	PC1	PC2	PC3	PC4	PC5	PC6	PC7	PC8	PC9	PC10	SV1	SV2	SV3	SV4	SV5	SV6	SV7	SV8	SV9	SV10	SV11	SV12	SV13	SV14	SV15	SV16	SV17	SV18	SV19
treatment		Polychoric	Polychoric	Polychoric	Polychoric	Polychoric	Polychoric	Polychoric	Polychoric	Polychoric	Polyserial	Polyserial	Polyserial	Polychoric	Polyserial	Polyserial	Polychoric	Polychoric	Polychoric	Polychoric	Polyserial	Polyserial	Polyserial	Polyserial	Polyserial	Polyserial	Polyserial	Polyserial	Polyserial	Polyserial	Polyserial	Polyserial	Polyserial	Polyserial	Polyserial	Polyserial	Polyserial	Polyserial	Polyserial	Polyserial	Polyserial	Polyserial	Polyserial	Polyserial	Polyserial	Polyserial	Polyserial	Polyserial	Polyserial
crs	Polychoric		Polychoric	Polychoric	Polychoric	Polychoric	Polychoric	Polychoric	Polychoric	Polychoric	Polyserial	Polyserial	Polyserial	Polychoric	Polyserial	Polyserial	Polychoric	Polychoric	Polychoric	Polychoric	Polyserial	Polyserial	Polyserial	Polyserial	Polyserial	Polyserial	Polyserial	Polyserial	Polyserial	Polyserial	Polyserial	Polyserial	Polyserial	Polyserial	Polyserial	Polyserial	Polyserial	Polyserial	Polyserial	Polyserial	Polyserial	Polyserial	Polyserial	Polyserial	Polyserial	Polyserial	Polyserial	Polyserial	Polyserial
atopy	Polychoric	Polychoric		Polychoric	Polychoric	Polychoric	Polychoric	Polychoric	Polychoric	Polychoric	Polyserial	Polyserial	Polyserial	Polychoric	Polyserial	Polyserial	Polychoric	Polychoric	Polychoric	Polychoric	Polyserial	Polyserial	Polyserial	Polyserial	Polyserial	Polyserial	Polyserial	Polyserial	Polyserial	Polyserial	Polyserial	Polyserial	Polyserial	Polyserial	Polyserial	Polyserial	Polyserial	Polyserial	Polyserial	Polyserial	Polyserial	Polyserial	Polyserial	Polyserial	Polyserial	Polyserial	Polyserial	Polyserial	Polyserial
asthma	Polychoric	Polychoric	Polychoric		Polychoric	Polychoric	Polychoric	Polychoric	Polychoric	Polychoric	Polyserial	Polyserial	Polyserial	Polychoric	Polyserial	Polyserial	Polychoric	Polychoric	Polychoric	Polychoric	Polyserial	Polyserial	Polyserial	Polyserial	Polyserial	Polyserial	Polyserial	Polyserial	Polyserial	Polyserial	Polyserial	Polyserial	Polyserial	Polyserial	Polyserial	Polyserial	Polyserial	Polyserial	Polyserial	Polyserial	Polyserial	Polyserial	Polyserial	Polyserial	Polyserial	Polyserial	Polyserial	Polyserial	Polyserial
steroid	Polychoric	Polychoric	Polychoric	Polychoric		Polychoric	Polychoric	Polychoric	Polychoric	Polychoric	Polyserial	Polyserial	Polyserial	Polychoric	Polyserial	Polyserial	Polychoric	Polychoric	Polychoric	Polychoric	Polyserial	Polyserial	Polyserial	Polyserial	Polyserial	Polyserial	Polyserial	Polyserial	Polyserial	Polyserial	Polyserial	Polyserial	Polyserial	Polyserial	Polyserial	Polyserial	Polyserial	Polyserial	Polyserial	Polyserial	Polyserial	Polyserial	Polyserial	Polyserial	Polyserial	Polyserial	Polyserial	Polyserial	Polyserial
smoking	Polychoric	Polychoric	Polychoric	Polychoric	Polychoric		Polychoric	Polychoric	Polychoric	Polychoric	Polyserial	Polyserial	Polyserial	Polychoric	Polyserial	Polyserial	Polychoric	Polychoric	Polychoric	Polychoric	Polyserial	Polyserial	Polyserial	Polyserial	Polyserial	Polyserial	Polyserial	Polyserial	Polyserial	Polyserial	Polyserial	Polyserial	Polyserial	Polyserial	Polyserial	Polyserial	Polyserial	Polyserial	Polyserial	Polyserial	Polyserial	Polyserial	Polyserial	Polyserial	Polyserial	Polyserial	Polyserial	Polyserial	Polyserial
sex	Polychoric	Polychoric	Polychoric	Polychoric	Polychoric	Polychoric		Polychoric	Polychoric	Polychoric	Polyserial	Polyserial	Polyserial	Polychoric	Polyserial	Polyserial	Polychoric	Polychoric	Polychoric	Polychoric	Polyserial	Polyserial	Polyserial	Polyserial	Polyserial	Polyserial	Polyserial	Polyserial	Polyserial	Polyserial	Polyserial	Polyserial	Polyserial	Polyserial	Polyserial	Polyserial	Polyserial	Polyserial	Polyserial	Polyserial	Polyserial	Polyserial	Polyserial	Polyserial	Polyserial	Polyserial	Polyserial	Polyserial	Polyserial
sample_well	Polychoric	Polychoric	Polychoric	Polychoric	Polychoric	Polychoric	Polychoric		Polychoric	Polychoric	Polyserial	Polyserial	Polyserial	Polychoric	Polyserial	Polyserial	Polychoric	Polychoric	Polychoric	Polychoric	Polyserial	Polyserial	Polyserial	Polyserial	Polyserial	Polyserial	Polyserial	Polyserial	Polyserial	Polyserial	Polyserial	Polyserial	Polyserial	Polyserial	Polyserial	Polyserial	Polyserial	Polyserial	Polyserial	Polyserial	Polyserial	Polyserial	Polyserial	Polyserial	Polyserial	Polyserial	Polyserial	Polyserial	Polyserial
plate	Polychoric	Polychoric	Polychoric	Polychoric	Polychoric	Polychoric	Polychoric	Polychoric		Polychoric	Polyserial	Polyserial	Polyserial	Polychoric	Polyserial	Polyserial	Polychoric	Polychoric	Polychoric	Polychoric	Polyserial	Polyserial	Polyserial	Polyserial	Polyserial	Polyserial	Polyserial	Polyserial	Polyserial	Polyserial	Polyserial	Polyserial	Polyserial	Polyserial	Polyserial	Polyserial	Polyserial	Polyserial	Polyserial	Polyserial	Polyserial	Polyserial	Polyserial	Polyserial	Polyserial	Polyserial	Polyserial	Polyserial	Polyserial
rv.harvest	Polychoric	Polychoric	Polychoric	Polychoric	Polychoric	Polychoric	Polychoric	Polychoric	Polychoric		Polyserial	Polyserial	Polyserial	Polychoric	Polyserial	Polyserial	Polychoric	Polychoric	Polychoric	Polychoric	Polyserial	Polyserial	Polyserial	Polyserial	Polyserial	Polyserial	Polyserial	Polyserial	Polyserial	Polyserial	Polyserial	Polyserial	Polyserial	Polyserial	Polyserial	Polyserial	Polyserial	Polyserial	Polyserial	Polyserial	Polyserial	Polyserial	Polyserial	Polyserial	Polyserial	Polyserial	Polyserial	Polyserial	Polyserial
initial_culture_days	Polyserial	Polyserial	Polyserial	Polyserial	Polyserial	Polyserial	Polyserial	Polyserial	Polyserial	Polyserial		Pearson	Pearson	Polyserial	Pearson	Pearson	Polyserial	Polyserial	Polyserial	Polyserial	Pearson	Pearson	Pearson	Pearson	Pearson	Pearson	Pearson	Pearson	Pearson	Pearson	Pearson	Pearson	Pearson	Pearson	Pearson	Pearson	Pearson	Pearson	Pearson	Pearson	Pearson	Pearson	Pearson	Pearson	Pearson	Pearson	Pearson	Pearson	Pearson
cryo_days	Polyserial	Polyserial	Polyserial	Polyserial	Polyserial	Polyserial	Polyserial	Polyserial	Polyserial	Polyserial	Pearson		Pearson	Polyserial	Pearson	Pearson	Polyserial	Polyserial	Polyserial	Polyserial	Pearson	Pearson	Pearson	Pearson	Pearson	Pearson	Pearson	Pearson	Pearson	Pearson	Pearson	Pearson	Pearson	Pearson	Pearson	Pearson	Pearson	Pearson	Pearson	Pearson	Pearson	Pearson	Pearson	Pearson	Pearson	Pearson	Pearson	Pearson	Pearson
exp_culture_days_RV	Polyserial	Polyserial	Polyserial	Polyserial	Polyserial	Polyserial	Polyserial	Polyserial	Polyserial	Polyserial	Pearson	Pearson		Polyserial	Pearson	Pearson	Polyserial	Polyserial	Polyserial	Polyserial	Pearson	Pearson	Pearson	Pearson	Pearson	Pearson	Pearson	Pearson	Pearson	Pearson	Pearson	Pearson	Pearson	Pearson	Pearson	Pearson	Pearson	Pearson	Pearson	Pearson	Pearson	Pearson	Pearson	Pearson	Pearson	Pearson	Pearson	Pearson	Pearson
collection_method	Polychoric	Polychoric	Polychoric	Polychoric	Polychoric	Polychoric	Polychoric	Polychoric	Polychoric	Polychoric	Polyserial	Polyserial	Polyserial		Polyserial	Polyserial	Polychoric	Polychoric	Polychoric	Polychoric	Polyserial	Polyserial	Polyserial	Polyserial	Polyserial	Polyserial	Polyserial	Polyserial	Polyserial	Polyserial	Polyserial	Polyserial	Polyserial	Polyserial	Polyserial	Polyserial	Polyserial	Polyserial	Polyserial	Polyserial	Polyserial	Polyserial	Polyserial	Polyserial	Polyserial	Polyserial	Polyserial	Polyserial	Polyserial
age	Polyserial	Polyserial	Polyserial	Polyserial	Polyserial	Polyserial	Polyserial	Polyserial	Polyserial	Polyserial	Pearson	Pearson	Pearson	Polyserial		Pearson	Polyserial	Polyserial	Polyserial	Polyserial	Pearson	Pearson	Pearson	Pearson	Pearson	Pearson	Pearson	Pearson	Pearson	Pearson	Pearson	Pearson	Pearson	Pearson	Pearson	Pearson	Pearson	Pearson	Pearson	Pearson	Pearson	Pearson	Pearson	Pearson	Pearson	Pearson	Pearson	Pearson	Pearson
DNA_concentration	Polyserial	Polyserial	Polyserial	Polyserial	Polyserial	Polyserial	Polyserial	Polyserial	Polyserial	Polyserial	Pearson	Pearson	Pearson	Polyserial	Pearson		Polyserial	Polyserial	Polyserial	Polyserial	Pearson	Pearson	Pearson	Pearson	Pearson	Pearson	Pearson	Pearson	Pearson	Pearson	Pearson	Pearson	Pearson	Pearson	Pearson	Pearson	Pearson	Pearson	Pearson	Pearson	Pearson	Pearson	Pearson	Pearson	Pearson	Pearson	Pearson	Pearson	Pearson
surgeon	Polychoric	Polychoric	Polychoric	Polychoric	Polychoric	Polychoric	Polychoric	Polychoric	Polychoric	Polychoric	Polyserial	Polyserial	Polyserial	Polychoric	Polyserial	Polyserial		Polychoric	Polychoric	Polychoric	Polyserial	Polyserial	Polyserial	Polyserial	Polyserial	Polyserial	Polyserial	Polyserial	Polyserial	Polyserial	Polyserial	Polyserial	Polyserial	Polyserial	Polyserial	Polyserial	Polyserial	Polyserial	Polyserial	Polyserial	Polyserial	Polyserial	Polyserial	Polyserial	Polyserial	Polyserial	Polyserial	Polyserial	Polyserial
batch	Polychoric	Polychoric	Polychoric	Polychoric	Polychoric	Polychoric	Polychoric	Polychoric	Polychoric	Polychoric	Polyserial	Polyserial	Polyserial	Polychoric	Polyserial	Polyserial	Polychoric		Polychoric	Polychoric	Polyserial	Polyserial	Polyserial	Polyserial	Polyserial	Polyserial	Polyserial	Polyserial	Polyserial	Polyserial	Polyserial	Polyserial	Polyserial	Polyserial	Polyserial	Polyserial	Polyserial	Polyserial	Polyserial	Polyserial	Polyserial	Polyserial	Polyserial	Polyserial	Polyserial	Polyserial	Polyserial	Polyserial	Polyserial
chip_position	Polychoric	Polychoric	Polychoric	Polychoric	Polychoric	Polychoric	Polychoric	Polychoric	Polychoric	Polychoric	Polyserial	Polyserial	Polyserial	Polychoric	Polyserial	Polyserial	Polychoric	Polychoric		Polychoric	Polyserial	Polyserial	Polyserial	Polyserial	Polyserial	Polyserial	Polyserial	Polyserial	Polyserial	Polyserial	Polyserial	Polyserial	Polyserial	Polyserial	Polyserial	Polyserial	Polyserial	Polyserial	Polyserial	Polyserial	Polyserial	Polyserial	Polyserial	Polyserial	Polyserial	Polyserial	Polyserial	Polyserial	Polyserial
chip	Polychoric	Polychoric	Polychoric	Polychoric	Polychoric	Polychoric	Polychoric	Polychoric	Polychoric	Polychoric	Polyserial	Polyserial	Polyserial	Polychoric	Polyserial	Polyserial	Polychoric	Polychoric	Polychoric		Polyserial	Polyserial	Polyserial	Polyserial	Polyserial	Polyserial	Polyserial	Polyserial	Polyserial	Polyserial	Polyserial	Polyserial	Polyserial	Polyserial	Polyserial	Polyserial	Polyserial	Polyserial	Polyserial	Polyserial	Polyserial	Polyserial	Polyserial	Polyserial	Polyserial	Polyserial	Polyserial	Polyserial	Polyserial
PC1	Polyserial	Polyserial	Polyserial	Polyserial	Polyserial	Polyserial	Polyserial	Polyserial	Polyserial	Polyserial	Pearson	Pearson	Pearson	Polyserial	Pearson	Pearson	Polyserial	Polyserial	Polyserial	Polyserial		Pearson	Pearson	Pearson	Pearson	Pearson	Pearson	Pearson	Pearson	Pearson	Pearson	Pearson	Pearson	Pearson	Pearson	Pearson	Pearson	Pearson	Pearson	Pearson	Pearson	Pearson	Pearson	Pearson	Pearson	Pearson	Pearson	Pearson	Pearson
PC2	Polyserial	Polyserial	Polyserial	Polyserial	Polyserial	Polyserial	Polyserial	Polyserial	Polyserial	Polyserial	Pearson	Pearson	Pearson	Polyserial	Pearson	Pearson	Polyserial	Polyserial	Polyserial	Polyserial	Pearson		Pearson	Pearson	Pearson	Pearson	Pearson	Pearson	Pearson	Pearson	Pearson	Pearson	Pearson	Pearson	Pearson	Pearson	Pearson	Pearson	Pearson	Pearson	Pearson	Pearson	Pearson	Pearson	Pearson	Pearson	Pearson	Pearson	Pearson
PC3	Polyserial	Polyserial	Polyserial	Polyserial	Polyserial	Polyserial	Polyserial	Polyserial	Polyserial	Polyserial	Pearson	Pearson	Pearson	Polyserial	Pearson	Pearson	Polyserial	Polyserial	Polyserial	Polyserial	Pearson	Pearson		Pearson	Pearson	Pearson	Pearson	Pearson	Pearson	Pearson	Pearson	Pearson	Pearson	Pearson	Pearson	Pearson	Pearson	Pearson	Pearson	Pearson	Pearson	Pearson	Pearson	Pearson	Pearson	Pearson	Pearson	Pearson	Pearson
PC4	Polyserial	Polyserial	Polyserial	Polyserial	Polyserial	Polyserial	Polyserial	Polyserial	Polyserial	Polyserial	Pearson	Pearson	Pearson	Polyserial	Pearson	Pearson	Polyserial	Polyserial	Polyserial	Polyserial	Pearson	Pearson	Pearson		Pearson	Pearson	Pearson	Pearson	Pearson	Pearson	Pearson	Pearson	Pearson	Pearson	Pearson	Pearson	Pearson	Pearson	Pearson	Pearson	Pearson	Pearson	Pearson	Pearson	Pearson	Pearson	Pearson	Pearson	Pearson
PC5	Polyserial	Polyserial	Polyserial	Polyserial	Polyserial	Polyserial	Polyserial	Polyserial	Polyserial	Polyserial	Pearson	Pearson	Pearson	Polyserial	Pearson	Pearson	Polyserial	Polyserial	Polyserial	Polyserial	Pearson	Pearson	Pearson	Pearson		Pearson	Pearson	Pearson	Pearson	Pearson	Pearson	Pearson	Pearson	Pearson	Pearson	Pearson	Pearson	Pearson	Pearson	Pearson	Pearson	Pearson	Pearson	Pearson	Pearson	Pearson	Pearson	Pearson	Pearson
PC6	Polyserial	Polyserial	Polyserial	Polyserial	Polyserial	Polyserial	Polyserial	Polyserial	Polyserial	Polyserial	Pearson	Pearson	Pearson	Polyserial	Pearson	Pearson	Polyserial	Polyserial	Polyserial	Polyserial	Pearson	Pearson	Pearson	Pearson	Pearson		Pearson	Pearson	Pearson	Pearson	Pearson	Pearson	Pearson	Pearson	Pearson	Pearson	Pearson	Pearson	Pearson	Pearson	Pearson	Pearson	Pearson	Pearson	Pearson	Pearson	Pearson	Pearson	Pearson
PC7	Polyserial	Polyserial	Polyserial	Polyserial	Polyserial	Polyserial	Polyserial	Polyserial	Polyserial	Polyserial	Pearson	Pearson	Pearson	Polyserial	Pearson	Pearson	Polyserial	Polyserial	Polyserial	Polyserial	Pearson	Pearson	Pearson	Pearson	Pearson	Pearson		Pearson	Pearson	Pearson	Pearson	Pearson	Pearson	Pearson	Pearson	Pearson	Pearson	Pearson	Pearson	Pearson	Pearson	Pearson	Pearson	Pearson	Pearson	Pearson	Pearson	Pearson	Pearson
PC8	Polyserial	Polyserial	Polyserial	Polyserial	Polyserial	Polyserial	Polyserial	Polyserial	Polyserial	Polyserial	Pearson	Pearson	Pearson	Polyserial	Pearson	Pearson	Polyserial	Polyserial	Polyserial	Polyserial	Pearson	Pearson	Pearson	Pearson	Pearson	Pearson	Pearson		Pearson	Pearson	Pearson	Pearson	Pearson	Pearson	Pearson	Pearson	Pearson	Pearson	Pearson	Pearson	Pearson	Pearson	Pearson	Pearson	Pearson	Pearson	Pearson	Pearson	Pearson
PC9	Polyserial	Polyserial	Polyserial	Polyserial	Polyserial	Polyserial	Polyserial	Polyserial	Polyserial	Polyserial	Pearson	Pearson	Pearson	Polyserial	Pearson	Pearson	Polyserial	Polyserial	Polyserial	Polyserial	Pearson	Pearson	Pearson	Pearson	Pearson	Pearson	Pearson	Pearson		Pearson	Pearson	Pearson	Pearson	Pearson	Pearson	Pearson	Pearson	Pearson	Pearson	Pearson	Pearson	Pearson	Pearson	Pearson	Pearson	Pearson	Pearson	Pearson	Pearson
PC10	Polyserial	Polyserial	Polyserial	Polyserial	Polyserial	Polyserial	Polyserial	Polyserial	Polyserial	Polyserial	Pearson	Pearson	Pearson	Polyserial	Pearson	Pearson	Polyserial	Polyserial	Polyserial	Polyserial	Pearson	Pearson	Pearson	Pearson	Pearson	Pearson	Pearson	Pearson	Pearson		Pearson	Pearson	Pearson	Pearson	Pearson	Pearson	Pearson	Pearson	Pearson	Pearson	Pearson	Pearson	Pearson	Pearson	Pearson	Pearson	Pearson	Pearson	Pearson
SV1	Polyserial	Polyserial	Polyserial	Polyserial	Polyserial	Polyserial	Polyserial	Polyserial	Polyserial	Polyserial	Pearson	Pearson	Pearson	Polyserial	Pearson	Pearson	Polyserial	Polyserial	Polyserial	Polyserial	Pearson	Pearson	Pearson	Pearson	Pearson	Pearson	Pearson	Pearson	Pearson	Pearson		Pearson	Pearson	Pearson	Pearson	Pearson	Pearson	Pearson	Pearson	Pearson	Pearson	Pearson	Pearson	Pearson	Pearson	Pearson	Pearson	Pearson	Pearson
SV2	Polyserial	Polyserial	Polyserial	Polyserial	Polyserial	Polyserial	Polyserial	Polyserial	Polyserial	Polyserial	Pearson	Pearson	Pearson	Polyserial	Pearson	Pearson	Polyserial	Polyserial	Polyserial	Polyserial	Pearson	Pearson	Pearson	Pearson	Pearson	Pearson	Pearson	Pearson	Pearson	Pearson	Pearson		Pearson	Pearson	Pearson	Pearson	Pearson	Pearson	Pearson	Pearson	Pearson	Pearson	Pearson	Pearson	Pearson	Pearson	Pearson	Pearson	Pearson
SV3	Polyserial	Polyserial	Polyserial	Polyserial	Polyserial	Polyserial	Polyserial	Polyserial	Polyserial	Polyserial	Pearson	Pearson	Pearson	Polyserial	Pearson	Pearson	Polyserial	Polyserial	Polyserial	Polyserial	Pearson	Pearson	Pearson	Pearson	Pearson	Pearson	Pearson	Pearson	Pearson	Pearson	Pearson	Pearson		Pearson	Pearson	Pearson	Pearson	Pearson	Pearson	Pearson	Pearson	Pearson	Pearson	Pearson	Pearson	Pearson	Pearson	Pearson	Pearson
SV4	Polyserial	Polyserial	Polyserial	Polyserial	Polyserial	Polyserial	Polyserial	Polyserial	Polyserial	Polyserial	Pearson	Pearson	Pearson	Polyserial	Pearson	Pearson	Polyserial	Polyserial	Polyserial	Polyserial	Pearson	Pearson	Pearson	Pearson	Pearson	Pearson	Pearson	Pearson	Pearson	Pearson	Pearson	Pearson	Pearson		Pearson	Pearson	Pearson	Pearson	Pearson	Pearson	Pearson	Pearson	Pearson	Pearson	Pearson	Pearson	Pearson	Pearson	Pearson
SV5	Polyserial	Polyserial	Polyserial	Polyserial	Polyserial	Polyserial	Polyserial	Polyserial	Polyserial	Polyserial	Pearson	Pearson	Pearson	Polyserial	Pearson	Pearson	Polyserial	Polyserial	Polyserial	Polyserial	Pearson	Pearson	Pearson	Pearson	Pearson	Pearson	Pearson	Pearson	Pearson	Pearson	Pearson	Pearson	Pearson	Pearson		Pearson	Pearson	Pearson	Pearson	Pearson	Pearson	Pearson	Pearson	Pearson	Pearson	Pearson	Pearson	Pearson	Pearson
SV6	Polyserial	Polyserial	Polyserial	Polyserial	Polyserial	Polyserial	Polyserial	Polyserial	Polyserial	Polyserial	Pearson	Pearson	Pearson	Polyserial	Pearson	Pearson	Polyserial	Polyserial	Polyserial	Polyserial	Pearson	Pearson	Pearson	Pearson	Pearson	Pearson	Pearson	Pearson	Pearson	Pearson	Pearson	Pearson	Pearson	Pearson	Pearson		Pearson	Pearson	Pearson	Pearson	Pearson	Pearson	Pearson	Pearson	Pearson	Pearson	Pearson	Pearson	Pearson
SV7	Polyserial	Polyserial	Polyserial	Polyserial	Polyserial	Polyserial	Polyserial	Polyserial	Polyserial	Polyserial	Pearson	Pearson	Pearson	Polyserial	Pearson	Pearson	Polyserial	Polyserial	Polyserial	Polyserial	Pearson	Pearson	Pearson	Pearson	Pearson	Pearson	Pearson	Pearson	Pearson	Pearson	Pearson	Pearson	Pearson	Pearson	Pearson	Pearson		Pearson	Pearson	Pearson	Pearson	Pearson	Pearson	Pearson	Pearson	Pearson	Pearson	Pearson	Pearson
SV8	Polyserial	Polyserial	Polyserial	Polyserial	Polyserial	Polyserial	Polyserial	Polyserial	Polyserial	Polyserial	Pearson	Pearson	Pearson	Polyserial	Pearson	Pearson	Polyserial	Polyserial	Polyserial	Polyserial	Pearson	Pearson	Pearson	Pearson	Pearson	Pearson	Pearson	Pearson	Pearson	Pearson	Pearson	Pearson	Pearson	Pearson	Pearson	Pearson	Pearson		Pearson	Pearson	Pearson	Pearson	Pearson	Pearson	Pearson	Pearson	Pearson	Pearson	Pearson
SV9	Polyserial	Polyserial	Polyserial	Polyserial	Polyserial	Polyserial	Polyserial	Polyserial	Polyserial	Polyserial	Pearson	Pearson	Pearson	Polyserial	Pearson	Pearson	Polyserial	Polyserial	Polyserial	Polyserial	Pearson	Pearson	Pearson	Pearson	Pearson	Pearson	Pearson	Pearson	Pearson	Pearson	Pearson	Pearson	Pearson	Pearson	Pearson	Pearson	Pearson	Pearson		Pearson	Pearson	Pearson	Pearson	Pearson	Pearson	Pearson	Pearson	Pearson	Pearson
SV10	Polyserial	Polyserial	Polyserial	Polyserial	Polyserial	Polyserial	Polyserial	Polyserial	Polyserial	Polyserial	Pearson	Pearson	Pearson	Polyserial	Pearson	Pearson	Polyserial	Polyserial	Polyserial	Polyserial	Pearson	Pearson	Pearson	Pearson	Pearson	Pearson	Pearson	Pearson	Pearson	Pearson	Pearson	Pearson	Pearson	Pearson	Pearson	Pearson	Pearson	Pearson	Pearson		Pearson	Pearson	Pearson	Pearson	Pearson	Pearson	Pearson	Pearson	Pearson
SV11	Polyserial	Polyserial	Polyserial	Polyserial	Polyserial	Polyserial	Polyserial	Polyserial	Polyserial	Polyserial	Pearson	Pearson	Pearson	Polyserial	Pearson	Pearson	Polyserial	Polyserial	Polyserial	Polyserial	Pearson	Pearson	Pearson	Pearson	Pearson	Pearson	Pearson	Pearson	Pearson	Pearson	Pearson	Pearson	Pearson	Pearson	Pearson	Pearson	Pearson	Pearson	Pearson	Pearson		Pearson	Pearson	Pearson	Pearson	Pearson	Pearson	Pearson	Pearson
SV12	Polyserial	Polyserial	Polyserial	Polyserial	Polyserial	Polyserial	Polyserial	Polyserial	Polyserial	Polyserial	Pearson	Pearson	Pearson	Polyserial	Pearson	Pearson	Polyserial	Polyserial	Polyserial	Polyserial	Pearson	Pearson	Pearson	Pearson	Pearson	Pearson	Pearson	Pearson	Pearson	Pearson	Pearson	Pearson	Pearson	Pearson	Pearson	Pearson	Pearson	Pearson	Pearson	Pearson	Pearson		Pearson	Pearson	Pearson	Pearson	Pearson	Pearson	Pearson
SV13	Polyserial	Polyserial	Polyserial	Polyserial	Polyserial	Polyserial	Polyserial	Polyserial	Polyserial	Polyserial	Pearson	Pearson	Pearson	Polyserial	Pearson	Pearson	Polyserial	Polyserial	Polyserial	Polyserial	Pearson	Pearson	Pearson	Pearson	Pearson	Pearson	Pearson	Pearson	Pearson	Pearson	Pearson	Pearson	Pearson	Pearson	Pearson	Pearson	Pearson	Pearson	Pearson	Pearson	Pearson	Pearson		Pearson	Pearson	Pearson	Pearson	Pearson	Pearson
SV14	Polyserial	Polyserial	Polyserial	Polyserial	Polyserial	Polyserial	Polyserial	Polyserial	Polyserial	Polyserial	Pearson	Pearson	Pearson	Polyserial	Pearson	Pearson	Polyserial	Polyserial	Polyserial	Polyserial	Pearson	Pearson	Pearson	Pearson	Pearson	Pearson	Pearson	Pearson	Pearson	Pearson	Pearson	Pearson	Pearson	Pearson	Pearson	Pearson	Pearson	Pearson	Pearson	Pearson	Pearson	Pearson	Pearson		Pearson	Pearson	Pearson	Pearson	Pearson
SV15	Polyserial	Polyserial	Polyserial	Polyserial	Polyserial	Polyserial	Polyserial	Polyserial	Polyserial	Polyserial	Pearson	Pearson	Pearson	Polyserial	Pearson	Pearson	Polyserial	Polyserial	Polyserial	Polyserial	Pearson	Pearson	Pearson	Pearson	Pearson	Pearson	Pearson	Pearson	Pearson	Pearson	Pearson	Pearson	Pearson	Pearson	Pearson	Pearson	Pearson	Pearson	Pearson	Pearson	Pearson	Pearson	Pearson	Pearson		Pearson	Pearson	Pearson	Pearson
SV16	Polyserial	Polyserial	Polyserial	Polyserial	Polyserial	Polyserial	Polyserial	Polyserial	Polyserial	Polyserial	Pearson	Pearson	Pearson	Polyserial	Pearson	Pearson	Polyserial	Polyserial	Polyserial	Polyserial	Pearson	Pearson	Pearson	Pearson	Pearson	Pearson	Pearson	Pearson	Pearson	Pearson	Pearson	Pearson	Pearson	Pearson	Pearson	Pearson	Pearson	Pearson	Pearson	Pearson	Pearson	Pearson	Pearson	Pearson	Pearson		Pearson	Pearson	Pearson
SV17	Polyserial	Polyserial	Polyserial	Polyserial	Polyserial	Polyserial	Polyserial	Polyserial	Polyserial	Polyserial	Pearson	Pearson	Pearson	Polyserial	Pearson	Pearson	Polyserial	Polyserial	Polyserial	Polyserial	Pearson	Pearson	Pearson	Pearson	Pearson	Pearson	Pearson	Pearson	Pearson	Pearson	Pearson	Pearson	Pearson	Pearson	Pearson	Pearson	Pearson	Pearson	Pearson	Pearson	Pearson	Pearson	Pearson	Pearson	Pearson	Pearson		Pearson	Pearson
SV18	Polyserial	Polyserial	Polyserial	Polyserial	Polyserial	Polyserial	Polyserial	Polyserial	Polyserial	Polyserial	Pearson	Pearson	Pearson	Polyserial	Pearson	Pearson	Polyserial	Polyserial	Polyserial	Polyserial	Pearson	Pearson	Pearson	Pearson	Pearson	Pearson	Pearson	Pearson	Pearson	Pearson	Pearson	Pearson	Pearson	Pearson	Pearson	Pearson	Pearson	Pearson	Pearson	Pearson	Pearson	Pearson	Pearson	Pearson	Pearson	Pearson	Pearson		Pearson
SV19	Polyserial	Polyserial	Polyserial	Polyserial	Polyserial	Polyserial	Polyserial	Polyserial	Polyserial	Polyserial	Pearson	Pearson	Pearson	Polyserial	Pearson	Pearson	Polyserial	Polyserial	Polyserial	Polyserial	Pearson	Pearson	Pearson	Pearson	Pearson	Pearson	Pearson	Pearson	Pearson	Pearson	Pearson	Pearson	Pearson	Pearson	Pearson	Pearson	Pearson	Pearson	Pearson	Pearson	Pearson	Pearson	Pearson	Pearson	Pearson	Pearson	Pearson	Pearson
SV20	Polyserial	Polyserial	Polyserial	Polyserial	Polyserial	Polyserial	Polyserial	Polyserial	Polyserial	Polyserial	Pearson	Pearson	Pearson	Polyserial	Pearson	Pearson	Polyserial	Polyserial	Polyserial	Polyserial	Pearson	Pearson	Pearson	Pearson	Pearson	Pearson	Pearson	Pearson	Pearson	Pearson	Pearson	Pearson	Pearson	Pearson	Pearson	Pearson	Pearson	Pearson	Pearson	Pearson	Pearson	Pearson	Pearson	Pearson	Pearson	Pearson	Pearson	Pearson	Pearson
SV21	Polyserial	Polyserial	Polyserial	Polyserial	Polyserial	Polyserial	Polyserial	Polyserial	Polyserial	Polyserial	Pearson	Pearson	Pearson	Polyserial	Pearson	Pearson	Polyserial	Polyserial	Polyserial	Polyserial	Pearson	Pearson	Pearson	Pearson	Pearson	Pearson	Pearson	Pearson	Pearson	Pearson	Pearson	Pearson	Pearson	Pearson	Pearson	Pearson	Pearson	Pearson	Pearson	Pearson	Pearson	Pearson	Pearson	Pearson	Pearson	Pearson	Pearson	Pearson	Pearson
SV22	Polyserial	Polyserial	Polyserial	Polyserial	Polyserial	Polyserial	Polyserial	Polyserial	Polyserial	Polyserial	Pearson	Pearson	Pearson	Polyserial	Pearson	Pearson	Polyserial	Polyserial	Polyserial	Polyserial	Pearson	Pearson	Pearson	Pearson	Pearson	Pearson	Pearson	Pearson	Pearson	Pearson	Pearson	Pearson	Pearson	Pearson	Pearson	Pearson	Pearson	Pearson	Pearson	Pearson	Pearson	Pearson	Pearson	Pearson	Pearson	Pearson	Pearson	Pearson	Pearson
SV23	Polyserial	Polyserial	Polyserial	Polyserial	Polyserial	Polyserial	Polyserial	Polyserial	Polyserial	Polyserial	Pearson	Pearson	Pearson	Polyserial	Pearson	Pearson	Polyserial	Polyserial	Polyserial	Polyserial	Pearson	Pearson	Pearson	Pearson	Pearson	Pearson	Pearson	Pearson	Pearson	Pearson	Pearson	Pearson	Pearson	Pearson	Pearson	Pearson	Pearson	Pearson	Pearson	Pearson	Pearson	Pearson	Pearson	Pearson	Pearson	Pearson	Pearson	Pearson	Pearson
SV24	Polyserial	Polyserial	Polyserial	Polyserial	Polyserial	Polyserial	Polyserial	Polyserial	Polyserial	Polyserial	Pearson	Pearson	Pearson	Polyserial	Pearson	Pearson	Polyserial	Polyserial	Polyserial	Polyserial	Pearson	Pearson	Pearson	Pearson	Pearson	Pearson	Pearson	Pearson	Pearson	Pearson	Pearson	Pearson	Pearson	Pearson	Pearson	Pearson	Pearson	Pearson	Pearson	Pearson	Pearson	Pearson	Pearson	Pearson	Pearson	Pearson	Pearson	Pearson	Pearson
SV25	Polyserial	Polyserial	Polyserial	Polyserial	Polyserial	Polyserial	Polyserial	Polyserial	Polyserial	Polyserial	Pearson	Pearson	Pearson	Polyserial	Pearson	Pearson	Polyserial	Polyserial	Polyserial	Polyserial	Pearson	Pearson	Pearson	Pearson	Pearson	Pearson	Pearson	Pearson	Pearson	Pearson	Pearson	Pearson	Pearson	Pearson	Pearson	Pearson	Pearson	Pearson	Pearson	Pearson	Pearson	Pearson	Pearson	Pearson	Pearson	Pearson	Pearson	Pearson	Pearson
SV26	Polyserial	Polyserial	Polyserial	Polyserial	Polyserial	Polyserial	Polyserial	Polyserial	Polyserial	Polyserial	Pearson	Pearson	Pearson	Polyserial	Pearson	Pearson	Polyserial	Polyserial	Polyserial	Polyserial	Pearson	Pearson	Pearson	Pearson	Pearson	Pearson	Pearson	Pearson	Pearson	Pearson	Pearson	Pearson	Pearson	Pearson	Pearson	Pearson	Pearson	Pearson	Pearson	Pearson	Pearson	Pearson	Pearson	Pearson	Pearson	Pearson	Pearson	Pearson	Pearson
SV27	Polyserial	Polyserial	Polyserial	Polyserial	Polyserial	Polyserial	Polyserial	Polyserial	Polyserial	Polyserial	Pearson	Pearson	Pearson	Polyserial	Pearson	Pearson	Polyserial	Polyserial	Polyserial	Polyserial	Pearson	Pearson	Pearson	Pearson	Pearson	Pearson	Pearson	Pearson	Pearson	Pearson	Pearson	Pearson	Pearson	Pearson	Pearson	Pearson	Pearson	Pearson	Pearson	Pearson	Pearson	Pearson	Pearson	Pearson	Pearson	Pearson	Pearson	Pearson	Pearson
SV28	Polyserial	Polyserial	Polyserial	Polyserial	Polyserial	Polyserial	Polyserial	Polyserial	Polyserial	Polyserial	Pearson	Pearson	Pearson	Polyserial	Pearson	Pearson	Polyserial	Polyserial	Polyserial	Polyserial	Pearson	Pearson	Pearson	Pearson	Pearson	Pearson	Pearson	Pearson	Pearson	Pearson	Pearson	Pearson	Pearson	Pearson	Pearson	Pearson	Pearson	Pearson	Pearson	Pearson	Pearson	Pearson	Pearson	Pearson	Pearson	Pearson	Pearson	Pearson	Pearson
SV29	Polyserial	Polyserial	Polyserial	Polyserial	Polyserial	Polyserial	Polyserial	Polyserial	Polyserial	Polyserial	Pearson	Pearson	Pearson	Polyserial	Pearson	Pearson	Polyserial	Polyserial	Polyserial	Polyserial	Pearson	Pearson	Pearson	Pearson	Pearson	Pearson	Pearson	Pearson	Pearson	Pearson	Pearson	Pearson	Pearson	Pearson	Pearson	Pearson	Pearson	Pearson	Pearson	Pearson	Pearson	Pearson	Pearson	Pearson	Pearson	Pearson	Pearson	Pearson	Pearson
SV30	Polyserial	Polyserial	Polyserial	Polyserial	Polyserial	Polyserial	Polyserial	Polyserial	Polyserial	Polyserial	Pearson	Pearson	Pearson	Polyserial	Pearson	Pearson	Polyserial	Polyserial	Polyserial	Polyserial	Pearson	Pearson	Pearson	Pearson	Pearson	Pearson	Pearson	Pearson	Pearson	Pearson	Pearson	Pearson	Pearson	Pearson	Pearson	Pearson	Pearson	Pearson	Pearson	Pearson	Pearson	Pearson	Pearson	Pearson	Pearson	Pearson	Pearson	Pearson	Pearson
SV31	Polyserial	Polyserial	Polyserial	Polyserial	Polyserial	Polyserial	Polyserial	Polyserial	Polyserial	Polyserial	Pearson	Pearson	Pearson	Polyserial	Pearson	Pearson	Polyserial	Polyserial	Polyserial	Polyserial	Pearson	Pearson	Pearson	Pearson	Pearson	Pearson	Pearson	Pearson	Pearson	Pearson	Pearson	Pearson	Pearson	Pearson	Pearson	Pearson	Pearson	Pearson	Pearson	Pearson	Pearson	Pearson	Pearson	Pearson	Pearson	Pearson	Pearson	Pearson	Pearson
SV32	Polyserial	Polyserial	Polyserial	Polyserial	Polyserial	Polyserial	Polyserial	Polyserial	Polyserial	Polyserial	Pearson	Pearson	Pearson	Polyserial	Pearson	Pearson	Polyserial	Polyserial	Polyserial	Polyserial	Pearson	Pearson	Pearson	Pearson	Pearson	Pearson	Pearson	Pearson	Pearson	Pearson	Pearson	Pearson	Pearson	Pearson	Pearson	Pearson	Pearson	Pearson	Pearson	Pearson	Pearson	Pearson	Pearson	Pearson	Pearson	Pearson	Pearson	Pearson	Pearson
SV33	Polyserial	Polyserial	Polyserial	Polyserial	Polyserial	Polyserial	Polyserial	Polyserial	Polyserial	Polyserial	Pearson	Pearson	Pearson	Polyserial	Pearson	Pearson	Polyserial	Polyserial	Polyserial	Polyserial	Pearson	Pearson	Pearson	Pearson	Pearson	Pearson	Pearson	Pearson	Pearson	Pearson	Pearson	Pearson	Pearson	Pearson	Pearson	Pearson	Pearson	Pearson	Pearson	Pearson	Pearson	Pearson	Pearson	Pearson	Pearson	Pearson	Pearson	Pearson	Pearson
SV34	Polyserial	Polyserial	Polyserial	Polyserial	Polyserial	Polyserial	Polyserial	Polyserial	Polyserial	Polyserial	Pearson	Pearson	Pearson	Polyserial	Pearson	Pearson	Polyserial	Polyserial	Polyserial	Polyserial	Pearson	Pearson	Pearson	Pearson	Pearson	Pearson	Pearson	Pearson	Pearson	Pearson	Pearson	Pearson	Pearson	Pearson	Pearson	Pearson	Pearson	Pearson	Pearson	Pearson	Pearson	Pearson	Pearson	Pearson	Pearson	Pearson	Pearson	Pearson	Pearson
SV35	Polyserial	Polyserial	Polyserial	Polyserial	Polyserial	Polyserial	Polyserial	Polyserial	Polyserial	Polyserial	Pearson	Pearson	Pearson	Polyserial	Pearson	Pearson	Polyserial	Polyserial	Polyserial	Polyserial	Pearson	Pearson	Pearson	Pearson	Pearson	Pearson	Pearson	Pearson	Pearson	Pearson	Pearson	Pearson	Pearson	Pearson	Pearson	Pearson	Pearson	Pearson	Pearson	Pearson	Pearson	Pearson	Pearson	Pearson	Pearson	Pearson	Pearson	Pearson	Pearson
SV36	Polyserial	Polyserial	Polyserial	Polyserial	Polyserial	Polyserial	Polyserial	Polyserial	Polyserial	Polyserial	Pearson	Pearson	Pearson	Polyserial	Pearson	Pearson	Polyserial	Polyserial	Polyserial	Polyserial	Pearson	Pearson	Pearson	Pearson	Pearson	Pearson	Pearson	Pearson	Pearson	Pearson	Pearson	Pearson	Pearson	Pearson	Pearson	Pearson	Pearson	Pearson	Pearson	Pearson	Pearson	Pearson	Pearson	Pearson	Pearson	Pearson	Pearson	Pearson	Pearson
SV37	Polyserial	Polyserial	Polyserial	Polyserial	Polyserial	Polyserial	Polyserial	Polyserial	Polyserial	Polyserial	Pearson	Pearson	Pearson	Polyserial	Pearson	Pearson	Polyserial	Polyserial	Polyserial	Polyserial	Pearson	Pearson	Pearson	Pearson	Pearson	Pearson	Pearson	Pearson	Pearson	Pearson	Pearson	Pearson	Pearson	Pearson	Pearson	Pearson	Pearson	Pearson	Pearson	Pearson	Pearson	Pearson	Pearson	Pearson	Pearson	Pearson	Pearson	Pearson	Pearson
[truncated: 18 more columns]
