# Supplementary material for: Multi-omics colocalization with genome-wide association studies reveals a context-specific genetic mechanism at a childhood onset asthma risk locus
Source: Genome Med. 2021 Oct 10;13:157. doi: 10.1186/s13073-021-00967-y (PMC8504130; doi:10.1186/s13073-021-00967-y)
Supplement: Supplementary file 5 — Additional file 5: DNA methylation PCA results for unadjusted (DNA methylation Unadjusted) and adjusted (DNA methylation Adjusted) data. P-values are shown for correlations for the first 10 PCs with each covariate. [file 13073_2021_967_MOESM5_ESM.xlsx]

## Sheet: Legend for Additional File 5
Additional File 5 DNA methylation PCA results for unadjusted (DNAm Unadjusted) and adjusted (DNAm Adjusted) data. P-values are shown for correlations for the first 10 PCs with each covariate.

## Sheet: DNAm Unadjusted
	Prop. of variation	treatment	crs	atopy	asthma	steroid	smoking	sex	sample_well	plate	rv.harvest	A260/280	initial_culture_days	cryo_days	exp_culture_days_RV	collection_method	age	DNA_concentration	surgeon	batch	chip_position	chip	PC1	PC2	PC3	PC4	PC5	PC6	PC7	PC8	PC9	PC10	SV1	SV2	SV3	SV4	SV5	SV6	SV7	SV8	SV9	SV10	SV11	SV12	SV13	SV14	SV15	SV16	SV17
PC1	0.13538	0.857114	0.0631556	0.573429	0.351432	0.179155	0.0295402	0.380188	0.602042	0.452633	0.000368145	0.499265	0.722474	0.160784	0.0147835	0.00986882	0.678285	0.000215786	0.930098	0.00331288	0.382156	0.0414969	0.752957	0.281128	0.427454	0.370041	0.0092858	0.391066	0.482238	0.160279	0.419459	0.00112364	0	0.989257	0.998539	0.992651	0.99938	0.997145	0.996413	0.995709	0.999016	0.989747	0.999486	0.997998	0.995178	0.992228	0.990977	0.987275	0.997645
PC2	0.0467	0.428314	0.00284088	0.603381	0.404085	0.324213	0.240116	0.161469	0.83177	0.603629	5.44437e-06	0.477558	0.483783	0.188144	0.0426045	0.00338433	0.865125	0.000478581	3.1908e-07	0.0643559	0.694708	0.523244	0.374594	0.0351877	2.20191e-05	0.441619	0.380628	0.508738	0.0509794	0.0372047	0.633733	0.492883	0.989147	0	0.964844	0.966801	0.998649	0.993029	0.994158	0.994822	0.999624	0.986564	0.999998	0.99567	0.993681	0.991223	0.99062	0.985809	0.997562
PC3	0.03826	0.0626743	0.0198211	0.918806	0.015638	0.696513	0.505409	0.725962	0.725795	8.41805e-05	0.208261	0.0440282	0.891545	0.611779	0.198919	0.0003469	0.0429902	0.0904856	0.29462	0.328889	0.400259	0.00332044	0.272938	0.705002	0.880199	0.655956	0.489271	0.1263	0.675698	0.00223749	0.537603	0.440678	0.998457	0.964566	0	0.939439	0.964017	0.989414	0.993577	0.991707	0.999694	0.98628	0.996554	0.999638	0.999266	0.991872	0.993621	0.985926	0.990698
PC4	0.03524	0.519	4.6398e-18	3.16104e-08	0.000267859	0.00210579	0.142233	0.0896468	0.433304	0.653781	8.75013e-06	0.103574	0.0259429	0.63269	3.98346e-05	2.50383e-07	0.00790468	0.613189	0.0269909	0.172616	0.144448	0.701694	0.714877	0.427703	0.400265	0.927454	0.676005	0.396931	0.402392	0.00599621	0.662047	0.527757	0.992577	0.966842	0.939188	0	0.998366	0.985851	0.991962	0.996033	0.998483	0.981501	0.998072	0.992591	0.992611	0.987957	0.988724	0.98015	0.994641
PC5	0.02631	0.754773	0.140037	0.142276	0.213645	0.00532498	0.30595	0.827287	0.450681	0.265938	0.00632257	0.725037	0.156425	0.00132884	0.85941	0.262813	0.109046	0.164309	0.0397184	0.198706	0.213668	0.822099	0.0209493	0.452282	0.0032247	0.922472	0.727699	0.16351	0.80542	0.472422	0.497113	0.218418	0.999357	0.998724	0.963963	0.998106	0	0.986533	0.984109	0.994005	0.994555	0.995639	0.99976	0.994893	0.997213	0.995881	0.992789	0.996573	0.999232
PC6	0.02009	0.582414	0.185432	0.676762	0.59044	0.966816	0.000426842	0.89594	0.398494	0.576484	8.98853e-10	0.0980439	0.773591	0.859901	0.00210746	0.17061	2.90017e-14	0.278981	0.117415	4.5935e-07	0.868802	0.812547	0.166614	0.0612426	0.664841	0.812695	0.408894	0.3144	0.933377	0.964002	0.62005	0.738295	0.996947	0.992828	0.989193	0.985374	0.9863	0	0.915606	0.978891	0.990629	0.954609	0.987948	0.98115	0.985697	0.977122	0.981353	0.962808	0.985703
PC7	0.01731	0.528443	0.0593868	0.601494	0.165686	0.634765	0.654649	0.000103036	0.336473	0.279018	0.00242954	0.343768	0.568664	0.3295	0.728365	0.853076	0.773765	0.518522	0.685225	0.0167716	0.224291	0.482991	0.385583	0.061585	0.371566	0.645322	0.38362	0.700064	0.295235	0.066204	0.608125	0.496642	0.996263	0.994029	0.993442	0.991688	0.984081	0.91478	0	0.95625	0.997619	0.941981	0.99643	0.994518	0.984366	0.981125	0.975772	0.963817	0.982149
PC8	0.01465	0.994055	0.0088348	0.00257164	0.135567	0.67888	0.755708	0.00697963	0.915308	0.123002	0.0230204	0.23415	0.489249	0.91322	0.977104	0.654816	0.114489	0.457671	0.0171308	0.002136	0.808529	0.123215	0.650695	0.0225407	0.0946228	0.496977	0.482479	0.344159	0.850174	0.23773	0.463071	0.0117767	0.995778	0.994886	0.991608	0.996207	0.99407	0.97869	0.955661	0	0.96757	0.973697	0.95466	0.968433	0.982454	0.985605	0.991469	0.986678	0.976748
PC9	0.01286	0.723068	0.0300053	0.952502	0.950848	0.148011	0.940696	0.524198	0.0584378	0.293672	0.000138167	0.765676	0.658335	0.113066	0.728125	0.214408	0.00569507	0.848787	0.00554378	0.0231188	0.670479	0.028745	0.103425	0.866675	0.237812	0.802614	0.0368052	0.129734	0.164981	0.935908	0.310847	0.00431369	0.998828	0.999853	0.99992	0.998154	0.994564	0.989908	0.998355	0.966789	0	0.906586	0.952376	0.972011	0.977505	0.997088	0.989946	0.975568	0.967864
PC10	0.01178	0.0163492	0.721025	0.103635	0.809051	0.0169853	0.557832	0.0492509	0.395208	0.108299	0.000112752	0.655027	0.23446	0.552923	0.0780963	0.00394831	0.000307466	0.157767	0.102392	0.00192273	0.118651	0.183052	2.86013e-05	0.171855	0.938355	0.690681	0.106015	0.0602577	0.30326	0.733041	0.108854	0.109926	0.988419	0.985064	0.984905	0.979154	0.995335	0.95059	0.937657	0.970241	0.903078	3.55637e-242	0.894623	0.703444	0.756402	0.702918	0.745292	0.659832	0.86623
[truncated: 20 more columns]

## Sheet: DNAm Adjusted
	Prop. of variation	treatment	crs	atopy	asthma	steroid	smoking	sex	sample_well	plate	rv.harvest	initial_culture_days	cryo_days	exp_culture_days_RV	collection_method	age	DNA_concentration	surgeon	batch	chip_position	chip	PC1	PC2	PC3	PC4	PC5	PC6	PC7	PC8	PC9	PC10	SV1	SV2	SV3	SV4	SV5	SV6	SV7	SV8	SV9	SV10	SV11	SV12	SV13	SV14	SV15	SV16	SV17	SV18
PC1	0.01478	0.942939	0.381119	0.742967	0.618396	0.2083	1	1	0.827079	1	1	0.20562	0.271572	1	0.279916	1	0.540639	0.404946	0.999993	0.927657	0.946894	0.616234	0.399839	0.437453	0.691572	0.103038	0.814653	0.892633	0.681082	0.882431	0.592646	1	1	1	1	1	1	1	1	1	1	1	1	1	1	1	1	1	1
PC2	0.0145	0.538659	0.844664	0.660404	0.386233	0.840819	1	1	0.674001	1	1	0.00165355	0.470301	1	0.902995	1	0.975576	0.0226305	0.952369	0.889623	0.00795696	0.971939	0.134126	0.533333	0.72067	0.478494	0.285576	0.0477984	0.898919	0.0681866	0.403673	1	1	1	1	1	1	1	1	1	1	1	1	1	1	1	1	1	1
PC3	0.01429	0.344544	0.202223	0.974231	0.00219446	0.164566	1	1	0.39083	1	1	0.654588	0.440404	1	0.191863	1	0.761803	0.0117184	1	0.312172	0.0708239	0.676785	0.152109	0.280647	0.488488	0.250181	0.933884	0.307322	0.119267	0.816962	0.269207	1	1	1	1	1	1	1	1	1	1	1	1	1	1	1	1	1	1
PC4	0.01399	0.62538	0.647815	0.132459	0.141263	0.561524	1	1	0.690335	1	1	0.02148	0.452442	1	0.0406672	1	0.583606	0.904833	0.999999	0.194253	0.260143	0.700104	0.907458	0.680587	0.0987456	0.32218	0.380019	0.434993	0.452714	0.168315	0.741197	1	1	1	1	1	1	1	1	1	1	1	1	1	1	1	1	1	1
PC5	0.01378	0.884487	0.534087	0.0429274	0.2556	0.789653	1	1	0.382404	1	1	0.56304	0.436361	1	0.0619248	1	0.113942	0.353184	1	0.303967	0.388558	0.946548	0.150551	0.172416	0.714412	0.0777064	0.0183769	0.564695	0.221254	0.600687	0.623363	1	1	1	1	1	1	1	1	1	1	1	1	1	1	1	1	1	1
PC6	0.01356	0.758433	0.914306	0.0197286	0.228929	0.90077	1	1	0.361831	1	1	0.455095	0.511738	1	0.263339	1	0.757794	0.0359392	1	0.425892	0.621728	0.840903	0.918904	0.00620381	0.229801	0.251803	0.0969862	0.5743	0.519395	0.728609	0.418456	1	1	1	1	1	1	1	1	1	1	1	1	1	1	1	1	1	1
PC7	0.01345	0.292156	0.748187	0.45803	0.1007	0.0419795	1	1	0.44935	1	1	0.894391	0.392982	1	0.532982	1	0.131758	0.141444	0.99416	0.947243	0.679063	0.781151	0.383602	0.518732	0.139229	0.727149	0.930106	0.0715504	0.746173	0.08664	0.527571	1	1	1	1	1	1	1	1	1	1	1	1	1	1	1	1	1	1
PC8	0.01331	0.938143	0.100751	0.973501	0.820043	0.666265	1	1	0.595042	1	1	0.555493	0.0128131	1	0.592816	1	0.689092	0.361469	0.993537	0.690958	0.867042	0.806008	0.809782	0.454575	0.845885	0.645434	0.636429	0.867941	0.848057	0.532296	0.63038	1	1	1	1	1	1	1	1	1	1	1	1	1	1	1	1	1	1
PC9	0.01316	0.834334	0.243093	0.463392	0.988935	0.00446421	1	1	0.0992006	1	1	0.143326	0.445587	1	0.438564	1	0.982624	0.113625	0.999947	0.109361	0.0662911	0.790786	0.698108	0.858625	0.783575	0.347011	0.20713	0.0498236	0.320384	0.439871	0.313871	1	1	1	1	1	1	1	1	1	1	1	1	1	1	1	1	1	1
PC10	0.01275	0.654574	0.977373	0.826081	0.432118	0.0670341	1	1	0.373728	1	1	0.101753	0.923653	1	0.383581	1	0.186062	0.00541992	1	0.436641	0.941127	0.471374	0.64781	0.0708826	0.663858	0.618517	0.932078	0.533504	0.109016	0.1916	0.827095	1	1	1	1	1	1	1	1	1	1	1	1	1	1	1	1	1	1
[truncated: 19 more columns]
