# Supplementary material for: Multi-omics colocalization with genome-wide association studies reveals a context-specific genetic mechanism at a childhood onset asthma risk locus
Source: Genome Med. 2021 Oct 10;13:157. doi: 10.1186/s13073-021-00967-y (PMC8504130; doi:10.1186/s13073-021-00967-y)
Supplement: Supplementary file 6 — Additional file 6:. FastQTL eQTL mapping results for vehicle-treated AECs (FDR< 0.05). [file 13073_2021_967_MOESM6_ESM.xlsx]

## Sheet: Legend for Additional File 6
Additional File 6 FastQTL eQTL mapping results for vehicle-treated AECs (FDR<0.05)

## Sheet: Additional File 6
gene_id	variant_id	tss_distance	ma_samples	ma_count	maf	npval	slope	slope_se	fdr
ENSG00000138175	rs4919644:104229588:G:A	-203901	23	24	0.126316	4.82404e-05	-0.0829419	0.0194536	0.0432943
ENSG00000138175	rs3740416:104230437:C:G	-203052	23	24	0.126316	4.82404e-05	-0.0829419	0.0194536	0.0432943
ENSG00000138175	rs45597333:104235972:G:A	-197517	23	24	0.126316	4.7261e-05	-0.0831095	0.0194678	0.0427134
ENSG00000138175	rs3740409:104236645:G:A	-196844	23	24	0.126316	4.82404e-05	-0.0829419	0.0194536	0.0432943
ENSG00000138175	rs4919647:104250754:A:C	-182735	23	24	0.126316	5.14854e-05	-0.0817327	0.0192486	0.0452984
ENSG00000138175	rs2902544:104261359:C:T	-172130	22	23	0.121053	1.09421e-05	-0.0892314	0.0191891	0.0156572
ENSG00000138175	rs139516830:104268858:AG:A	-164631	22	23	0.121053	1.09421e-05	-0.0892314	0.0191891	0.0156572
ENSG00000138175	rs185072800:104268860:C:A	-164629	22	23	0.121053	1.09421e-05	-0.0892314	0.0191891	0.0156572
ENSG00000138175	rs12774693:104270005:T:G	-163484	22	23	0.121053	1.09421e-05	-0.0892314	0.0191891	0.0156572
ENSG00000138175	rs10786670:104270781:G:A	-162708	22	23	0.121053	1.09421e-05	-0.0892314	0.0191891	0.0156572
ENSG00000138175	rs4919649:104272336:T:C	-161153	22	23	0.121053	1.09421e-05	-0.0892314	0.0191891	0.0156572
ENSG00000138175	rs4919650:104273863:C:T	-159626	22	23	0.121053	1.09421e-05	-0.0892314	0.0191891	0.0156572
ENSG00000138175	rs4919652:104274157:C:A	-159332	22	23	0.121053	1.09421e-05	-0.0892314	0.0191891	0.0156572
ENSG00000138175	rs2145307:104280664:G:A	-152825	22	23	0.121053	1.09421e-05	-0.0892314	0.0191891	0.0156572
ENSG00000138175	rs4919656:104282861:G:A	-150628	22	23	0.121053	1.09421e-05	-0.0892314	0.0191891	0.0156572
ENSG00000138175	rs10786674:104285086:C:T	-148403	20	21	0.110526	2.42532e-05	-0.0906108	0.0203844	0.0273078
ENSG00000065621	rs12356059:105997104:A:G	-31528	35	39	0.205263	3.58442e-05	-0.372416	0.0857601	0.0357645
ENSG00000065621	rs7088131:105997425:G:A	-31207	35	40	0.210526	4.71062e-05	-0.353691	0.0828327	0.042612
ENSG00000065621	rs12359560:105998442:C:A	-30190	35	40	0.210526	4.75017e-05	-0.354018	0.0829526	0.0428576
ENSG00000065621	rs111706568:105998607:TAAAG:T	-30025	35	40	0.210526	4.64963e-05	-0.354402	0.0829316	0.0422259
ENSG00000065621	rs17883150:106013050:G:A	-15582	40	50	0.263158	8.93668e-07	-0.366718	0.0696351	0.00267445
ENSG00000065621	rs2164624:106013445:G:A	-15187	42	54	0.284211	1.79726e-06	-0.33999	0.0666873	0.00446606
ENSG00000065621	rs144343542:106014764:CCGG:C	-13868	36	46	0.242105	7.31099e-07	-0.370197	0.0696633	0.00230035
ENSG00000065621	rs10883990:106018558:A:G	-10074	40	50	0.263158	1.19244e-06	-0.3576	0.0688057	0.00332593
ENSG00000065621	rs2282326:106020398:A:C	-8234	55	77	0.405263	2.02567e-06	-0.303345	0.0598404	0.00488067
ENSG00000065621	rs4925	-5843	40	50	0.263158	1.20162e-06	-0.356501	0.0686185	0.00333558
ENSG00000065621	rs11191979:106024867:T:C	-3765	40	50	0.263158	1.18688e-06	-0.356981	0.0686718	0.00331313
ENSG00000065621	rs1147611:106025258:G:T	-3374	57	81	0.426316	3.80118e-06	-0.292132	0.0594365	0.00778001
ENSG00000065621	rs45596840:106028154:G:A	-478	40	50	0.263158	1.17947e-06	-0.357019	0.0686591	0.00329837
ENSG00000065621	rs641071:106028157:G:T	-475	57	81	0.426316	3.8417e-06	-0.291853	0.0594114	0.00784134
ENSG00000065621	rs11191980:106032213:T:C	3581	38	46	0.242105	4.66096e-07	-0.386154	0.0712392	0.00165454
ENSG00000065621	rs568526:106033439:T:C	4807	55	77	0.405263	4.12702e-06	-0.293977	0.0600604	0.00821342
ENSG00000065621	rs17826034:106033504:A:G	4872	38	46	0.242105	4.62886e-07	-0.386196	0.0712255	0.00164605
ENSG00000065621	rs2297235:106034491:A:G	5859	38	46	0.242105	4.66096e-07	-0.386154	0.0712392	0.00165454
ENSG00000065621	rs276204:106035313:C:G	6681	55	77	0.405263	4.2082e-06	-0.293701	0.0600632	0.00831186
ENSG00000065621	rs7099030:106038347:T:C	9715	50	66	0.347368	1.0073e-05	-0.300182	0.0642632	0.0148112
ENSG00000065621	rs156697	10553	55	77	0.405263	4.23713e-06	-0.293441	0.0600307	0.00835163
ENSG00000065621	rs276203:106039303:A:G	10671	55	77	0.405263	4.23713e-06	-0.293441	0.0600307	0.00835163
ENSG00000065621	rs6584592:106039780:C:T	11148	50	66	0.347368	8.28872e-06	-0.30411	0.0644238	0.0129621
ENSG00000065621	rs1865926:106042502:G:T	13870	41	50	0.263158	6.64338e-08	-0.405738	0.0691103	0.000449302
ENSG00000065621	rs7079338:106043132:C:T	14500	39	47	0.247368	1.46289e-07	-0.406558	0.071448	0.000764137
ENSG00000065621	rs35528873:106045962:GT:G	17330	51	72	0.378947	9.66265e-07	-0.310601	0.0591888	0.00285101
ENSG00000065621	rs276210:106046403:A:G	17771	51	72	0.378947	9.55934e-07	-0.31076	0.05919	0.00282394
ENSG00000065621	rs987247:106046768:T:C	18136	39	47	0.247368	1.34107e-07	-0.408149	0.0714762	0.00071803
ENSG00000065621	rs157076:106048294:C:G	19662	52	72	0.378947	5.34856e-07	-0.319209	0.0592435	0.0018431
ENSG00000065621	rs11191989:106050315:T:C	21683	37	44	0.231579	5.59376e-08	-0.423139	0.0715982	0.00039451
ENSG00000065621	10:106053321:A:ATTTTTTTT	24689	51	69	0.363158	4.71093e-06	-0.30321	0.0623648	0.00904582
ENSG00000065621	rs156699	25009	52	73	0.384211	2.64776e-06	-0.298126	0.0595785	0.00603043
ENSG00000065621	rs157081:106055024:C:T	26392	52	73	0.384211	2.63725e-06	-0.298272	0.0595962	0.00601452
ENSG00000065621	rs157080:106055963:C:A	27331	52	73	0.384211	2.64903e-06	-0.298198	0.0595943	0.00603252
ENSG00000065621	rs3740466:106061169:C:T	32537	39	46	0.242105	5.31366e-08	-0.424025	0.071607	0.000379059
ENSG00000065621	rs34119210:106065999:CTT:C	37367	37	44	0.231579	4.98975e-08	-0.425546	0.0716915	0.000362845
ENSG00000065621	rs11191999:106066436:C:T	37804	41	48	0.252632	1.35382e-06	-0.38117	0.073774	0.00362047
ENSG00000065621	rs11192001:106067978:G:A	39346	39	46	0.242105	5.22165e-08	-0.424508	0.0716408	0.000375204
ENSG00000065621	rs10491046:106071001:A:G	42369	39	46	0.242105	5.25309e-08	-0.424541	0.0716628	0.00037623
ENSG00000065621	rs505701:106073566:T:C	44934	52	73	0.384211	2.53899e-06	-0.299683	0.0597671	0.00584645
ENSG00000065621	rs11595547:106076414:A:G	47782	37	44	0.231579	5.09778e-08	-0.426415	0.0718967	0.000369052
ENSG00000065621	rs7072534:106081702:A:G	53070	43	50	0.263158	3.96094e-06	-0.369229	0.0752782	0.0080025
ENSG00000065621	rs34564259:106084356:C:A	55724	43	49	0.257895	2.67123e-06	-0.385061	0.0769852	0.00607256
ENSG00000065621	rs11192007:106086395:T:C	57763	41	47	0.247368	3.44525e-06	-0.382406	0.0774214	0.00726832
ENSG00000065621	rs10883992:106089285:A:C	60653	43	52	0.273684	4.15041e-06	-0.350388	0.0716058	0.0082471
ENSG00000065621	rs11192008:106089426:G:A	60794	43	52	0.273684	4.15041e-06	-0.350388	0.0716058	0.0082471
ENSG00000065621	rs41291846:106093366:G:T	64734	41	50	0.263158	4.43971e-06	-0.348658	0.0714962	0.00864668
ENSG00000065621	rs17754543:106093483:A:T	64851	41	50	0.263158	4.43971e-06	-0.348658	0.0714962	0.00864668
ENSG00000065621	rs34349230:106093686:G:A	65054	41	50	0.263158	4.43971e-06	-0.348658	0.0714962	0.00864668
ENSG00000065621	rs3740464:106095598:G:A	66966	41	50	0.263158	4.25506e-06	-0.347955	0.0711983	0.00837635
ENSG00000065621	rs35497851:106097934:A:G	69302	39	45	0.236842	6.67579e-06	-0.369021	0.0772838	0.011121
ENSG00000065621	rs79660336:106098659:A:G	70027	41	50	0.263158	4.25506e-06	-0.347955	0.0711983	0.00837635
ENSG00000065621	rs7095770	70776	41	50	0.263158	4.24012e-06	-0.347882	0.0711706	0.00835521
ENSG00000065621	rs12360432:106102054:T:C	73422	42	51	0.268421	4.82799e-06	-0.346558	0.0713701	0.00918015
ENSG00000065621	rs12355780:106102074:A:C	73442	42	51	0.268421	4.89621e-06	-0.346315	0.0713714	0.00924693
ENSG00000065621	rs12355823:106102402:A:G	73770	41	50	0.263158	4.19554e-06	-0.348196	0.0711968	0.00829357
ENSG00000065621	rs72129817:106103351:AAGAC:A	74719	41	50	0.263158	4.47942e-06	-0.34759	0.0713094	0.00870368
ENSG00000065621	rs17754658:106104397:G:C	75765	41	50	0.263158	4.2744e-06	-0.348136	0.0712518	0.00839983
ENSG00000065621	rs12360096:106104914:C:A	76282	41	50	0.263158	4.2744e-06	-0.348136	0.0712518	0.00839983
ENSG00000065621	rs56407837:106105070:A:G	76438	41	50	0.263158	4.2744e-06	-0.348136	0.0712518	0.00839983
ENSG00000065621	rs11192015:106105609:A:G	76977	41	50	0.263158	4.2744e-06	-0.348136	0.0712518	0.00839983
ENSG00000065621	rs56044283:106107047:C:T	78415	41	50	0.263158	4.53424e-06	-0.34762	0.0713598	0.00878821
ENSG00000065621	rs11192018:106110094:G:A	81462	40	46	0.242105	5.54165e-06	-0.374121	0.0775949	0.00994583
ENSG00000065621	rs11192019:106111089:C:T	82457	43	52	0.273684	4.06302e-06	-0.350495	0.0715506	0.00816433
ENSG00000065621	rs12359649:106111179:A:G	82547	41	50	0.263158	4.02127e-06	-0.350348	0.0714833	0.00810259
ENSG00000119950	rs4918484:111948530:T:C	-18834	41	53	0.278947	1.56357e-05	0.110003	0.0241298	0.0201712
ENSG00000119950	rs7077820:111950114:G:A	-17250	41	53	0.278947	1.46971e-05	0.11033	0.0241174	0.0194261
ENSG00000119950	rs4918486	-16631	41	53	0.278947	1.42079e-05	0.110487	0.024106	0.0190342
ENSG00000119950	rs7071821:111954368:C:T	-12996	42	54	0.284211	3.06633e-05	0.10702	0.0244132	0.0320811
ENSG00000119950	rs11195021:111957646:G:T	-9718	41	53	0.278947	3.08011e-05	0.107151	0.0244497	0.032185
ENSG00000119950	rs2419318:111958130:T:C	-9234	41	53	0.278947	3.1045e-05	0.107178	0.0244675	0.0323666
ENSG00000119950	rs4918487:111984756:C:T	17392	31	34	0.178947	3.99617e-05	0.138018	0.0319952	0.0381244
ENSG00000119950	rs35741140:111985946:G:C	18582	31	34	0.178947	3.74497e-05	0.138424	0.0319617	0.0367937
ENSG00000119950	rs12774613:111987071:G:A	19707	31	34	0.178947	3.53683e-05	0.139085	0.0320025	0.035439
ENSG00000119950	rs11812839:111989675:G:A	22311	31	34	0.178947	3.08318e-05	0.139864	0.031916	0.0322092
ENSG00000119950	rs4917555:111991129:C:A	23765	31	34	0.178947	2.81449e-05	0.140344	0.0318516	0.0302294
ENSG00000119950	rs1418362:112003642:T:A	36278	29	32	0.168421	8.16843e-06	0.151536	0.0320769	0.0128501
ENSG00000119950	rs35212840:112042591:A:T	75227	24	26	0.136842	2.28743e-05	0.155607	0.0348865	0.0262069
ENSG00000119950	rs5787846:112065522:CT:C	98158	32	38	0.2	5.31195e-05	0.120444	0.0284214	0.0462055
ENSG00000119950	rs4918493:112070993:G:A	103629	32	38	0.2	4.45538e-05	0.122698	0.0286357	0.0410919
ENSG00000119950	rs7069723:112072502:T:C	105138	33	39	0.205263	4.34836e-05	0.123107	0.0286878	0.0403949
ENSG00000119950	rs7914540:112940368:T:C	973004	51	60	0.315789	4.98846e-05	0.113236	0.0266148	0.0443183
ENSG00000260917	rs11195916:114110201:T:C	-473049	44	49	0.257895	1.3596e-05	-0.100124	0.0217913	0.0184371
ENSG00000260917	rs12763672:114112049:G:A	-471201	44	48	0.252632	6.2219e-06	-0.105061	0.0219217	0.0107039
ENSG00000260917	rs7895808:114118976:A:G	-464274	44	48	0.252632	5.45469e-06	-0.105411	0.021845	0.00984878
ENSG00000260917	rs7896482:114119406:C:T	-463844	44	48	0.252632	5.40521e-06	-0.105467	0.0218464	0.00978892
ENSG00000260917	rs71483147:114119904:A:T	-463346	44	48	0.252632	5.42933e-06	-0.105353	0.0218278	0.00981336
ENSG00000260917	rs7917309:114122072:C:T	-461178	44	48	0.252632	3.45589e-05	-0.0975094	0.0224047	0.0348214
ENSG00000260917	rs34817051:114127356:T:G	-455894	43	46	0.242105	3.0677e-06	-0.111319	0.022408	0.00670402
ENSG00000260917	rs35230147:114130127:G:A	-453123	43	46	0.242105	3.07162e-06	-0.111349	0.0224155	0.0067083
ENSG00000260917	rs2419621	-448237	43	46	0.242105	3.13857e-06	-0.111165	0.0224023	0.00679
ENSG00000187164	rs2531685:118646129:G:C	2386	52	63	0.331579	4.60159e-05	-0.0753071	0.0176108	0.0419472
ENSG00000187164	rs10886017:118672531:C:A	28788	48	56	0.294737	5.4561e-05	0.0792905	0.0187421	0.0470044
ENSG00000187164	rs4752018:118678712:C:A	34969	40	45	0.236842	3.51363e-05	0.086388	0.0198694	0.0352692
ENSG00000187164	rs200595759:118683917:TATA:T	40174	54	63	0.331579	4.41264e-05	-0.0784074	0.018288	0.0407795
ENSG00000187164	rs4751614:118696266:A:T	52523	40	45	0.236842	4.52046e-05	0.0845484	0.01975	0.0415285
ENSG00000187164	rs7079724:118697466:G:A	53723	54	63	0.331579	4.38196e-05	-0.0784098	0.0182806	0.0405648
ENSG00000187164	rs7902527	71656	41	46	0.242105	5.32272e-05	0.0838669	0.0197928	0.0462629
ENSG00000187164	rs34348857:118718188:CA:C	74445	53	62	0.326316	3.58137e-05	-0.0793003	0.0182604	0.0357473
ENSG00000187164	rs2118207:118728991:T:C	85248	53	62	0.326316	3.63295e-05	0.0792501	0.0182647	0.0361082
ENSG00000187164	rs11197863:118745667:A:G	101924	55	64	0.336842	4.29504e-05	-0.0790724	0.0184122	0.0400029
ENSG00000165650	rs10377:119037009:A:C	-2992	67	90	0.473684	5.45967e-10	0.109896	0.0158613	1.59999e-05
ENSG00000165650	rs14240:119037071:T:C	-2930	67	90	0.473684	5.51611e-10	0.109874	0.0158632	1.61258e-05
ENSG00000165650	rs363237:119038528:T:C	-1473	67	90	0.473684	5.45967e-10	0.109896	0.0158613	1.59999e-05
ENSG00000165650	rs10886054:119052773:C:G	12772	67	90	0.473684	5.45967e-10	0.109896	0.0158613	1.59999e-05
ENSG00000165650	rs144031212:119055011:AACAC:A	15010	67	90	0.473684	5.94355e-10	0.109472	0.0158419	1.69323e-05
ENSG00000165650	rs2490628:119055123:T:C	15122	67	90	0.473684	5.45967e-10	0.109896	0.0158613	1.59999e-05
ENSG00000165650	rs181440	63470	67	90	0.473684	5.90445e-10	0.109195	0.0157986	1.69323e-05
ENSG00000198873	rs3824825:120939071:C:T	-28031	59	77	0.405263	2.84475e-05	0.10659	0.0242063	0.030495
ENSG00000198873	rs61876564:120939920:G:A	-27182	59	77	0.405263	2.86877e-05	0.10659	0.0242185	0.0306768
ENSG00000198873	rs7080535:120940518:G:C	-26584	59	77	0.405263	2.92046e-05	0.106521	0.0242286	0.0310707
ENSG00000198873	rs370067252:120941824:G:A	-25278	59	77	0.405263	3.02392e-05	0.106459	0.0242651	0.0317552
ENSG00000198873	rs7078965:120942380:T:C	-24722	59	77	0.405263	3.2537e-05	0.106111	0.0242923	0.0334828
ENSG00000198873	rs10886414:120947664:G:A	-19438	60	80	0.421053	2.9186e-05	0.104826	0.0238421	0.0310549
ENSG00000198873	rs35439312:120950575:C:CA	-16527	60	80	0.421053	2.61344e-05	0.106522	0.0240696	0.0287486
ENSG00000198873	rs1247800:120952030:G:A	-15072	60	80	0.421053	3.33269e-05	0.105324	0.0241472	0.034049
ENSG00000198873	rs12412287:120952512:T:C	-14590	59	79	0.415789	3.66262e-05	0.103957	0.0239708	0.0362951
ENSG00000198873	rs10510054	-9422	62	81	0.426316	3.51594e-05	0.106517	0.0245	0.0352867
ENSG00000198873	rs10886417:120957958:T:C	-9144	62	81	0.426316	2.51672e-05	0.108388	0.0244368	0.0280048
ENSG00000198873	rs10886421:120964176:T:C	-2926	63	82	0.431579	5.50171e-05	0.105246	0.0248904	0.0472669
ENSG00000198873	rs7923896:120965995:C:T	-1107	63	82	0.431579	2.857e-05	0.109772	0.0249354	0.0305841
ENSG00000198873	rs61876593:120966752:C:T	-350	62	81	0.426316	4.23472e-05	0.106928	0.0248767	0.0395943
ENSG00000120008	rs11199598:122610657:T:C	-31	55	71	0.373684	2.41529e-05	0.0502108	0.011293	0.0272281
ENSG00000120008	rs12242204:122614597:A:G	3909	58	74	0.389474	5.03299e-06	0.0542783	0.0112019	0.00937979
ENSG00000120008	rs7092537:122614904:T:C	4216	58	74	0.389474	5.03299e-06	0.0542783	0.0112019	0.00937979
ENSG00000120008	rs7092977:122615221:T:C	4533	58	74	0.389474	5.03299e-06	0.0542783	0.0112019	0.00937979
ENSG00000120008	rs7075047:122615258:C:T	4570	58	74	0.389474	5.03299e-06	0.0542783	0.0112019	0.00937979
ENSG00000120008	rs10886787:122615653:A:G	4965	65	83	0.436842	2.76999e-05	0.0517904	0.0117429	0.0298745
ENSG00000120008	rs7904153:122616062:C:G	5374	65	83	0.436842	2.76999e-05	0.0517904	0.0117429	0.0298745
ENSG00000120008	rs768798:122616358:T:C	5670	65	83	0.436842	2.76999e-05	0.0517904	0.0117429	0.0298745
ENSG00000120008	rs768799:122616604:G:A	5916	65	83	0.436842	2.76999e-05	0.0517904	0.0117429	0.0298745
ENSG00000120008	rs11199601:122616706:C:T	6018	58	74	0.389474	6.64443e-06	0.053783	0.0112609	0.0110779
ENSG00000120008	rs11199602:122616895:A:T	6207	58	74	0.389474	6.64443e-06	0.053783	0.0112609	0.0110779
ENSG00000120008	rs35233163:122618784:CT:C	8096	62	81	0.426316	2.10311e-05	0.0506143	0.0112923	0.0248003
ENSG00000120008	rs12359633:122618810:C:A	8122	58	74	0.389474	6.72876e-06	0.0537283	0.0112569	0.0111767
ENSG00000120008	rs10886788:122620251:G:A	9563	65	83	0.436842	2.80542e-05	0.0517283	0.0117377	0.0301547
ENSG00000120008	rs11199604:122620616:A:C	9928	58	74	0.389474	6.72876e-06	0.0537283	0.0112569	0.0111767
ENSG00000120008	rs35688582:122621303:GA:G	10615	58	74	0.389474	6.72876e-06	0.0537283	0.0112569	0.0111767
ENSG00000120008	rs17101001:122621384:C:T	10696	58	74	0.389474	6.72876e-06	0.0537283	0.0112569	0.0111767
ENSG00000120008	rs35270762:122621663:T:TG	10975	59	76	0.4	2.87745e-05	0.0498963	0.0113391	0.0307383
ENSG00000120008	rs3758507:122622838:T:C	12150	58	74	0.389474	6.72876e-06	0.0537283	0.0112569	0.0111767
ENSG00000120008	rs12263051:122623342:C:T	12654	58	74	0.389474	6.63659e-06	0.053803	0.0112644	0.0110698
ENSG00000120008	rs7092747:122624202:C:T	13514	65	83	0.436842	2.80542e-05	0.0517283	0.0117377	0.0301547
ENSG00000120008	rs7076911:122624270:T:C	13582	65	83	0.436842	2.80542e-05	0.0517283	0.0117377	0.0301547
ENSG00000120008	rs10886789:122624679:G:A	13991	58	74	0.389474	6.72876e-06	0.0537283	0.0112569	0.0111767
ENSG00000120008	rs11199608:122627668:C:T	16980	66	86	0.452632	5.69368e-05	0.0490488	0.0116252	0.0483682
ENSG00000120008	rs59791915:122628616:AG:A	17928	59	76	0.4	2.22182e-05	0.0507919	0.0113681	0.0257122
ENSG00000120008	rs6585668:122628674:A:G	17986	66	86	0.452632	5.74705e-05	0.0490157	0.0116243	0.0486614
ENSG00000120008	rs7082695:122629088:C:G	18400	66	86	0.452632	5.74705e-05	0.0490157	0.0116243	0.0486614
ENSG00000120008	rs144533860:122629297:T:TTTTTA	18609	59	76	0.4	2.27946e-05	0.0508088	0.0113889	0.0261534
ENSG00000120008	rs12355674:122629393:C:T	18705	59	76	0.4	2.35454e-05	0.0505986	0.0113632	0.026743
ENSG00000120008	rs4274146:122629522:A:G	18834	59	76	0.4	2.39663e-05	0.0505373	0.0113613	0.0270824
ENSG00000120008	rs4620639:122629743:C:A	19055	59	76	0.4	2.50708e-05	0.0503924	0.0113587	0.027922
ENSG00000120008	rs10466157:122633086:A:T	22398	59	76	0.4	3.08926e-05	0.0496651	0.0113346	0.0322461
ENSG00000120008	rs11199619:122634099:G:T	23411	59	76	0.4	3.08926e-05	0.0496651	0.0113346	0.0322461
ENSG00000120008	rs11199620:122634104:T:G	23416	59	76	0.4	3.08926e-05	0.0496651	0.0113346	0.0322461
ENSG00000120008	rs12784249:122634955:A:G	24267	59	76	0.4	3.08926e-05	0.0496651	0.0113346	0.0322461
ENSG00000120008	rs12247484:122635088:C:G	24400	59	76	0.4	3.08926e-05	0.0496651	0.0113346	0.0322461
ENSG00000120008	rs10886792:122636553:C:T	25865	59	76	0.4	3.08926e-05	0.0496651	0.0113346	0.0322461
ENSG00000120008	rs7907986:122637544:T:C	26856	57	73	0.384211	4.88293e-05	0.0484977	0.0113835	0.0436554
ENSG00000120008	rs1992274:122638073:T:A	27385	59	76	0.4	3.08926e-05	0.0496651	0.0113346	0.0322461
ENSG00000120008	rs3758509:122638860:G:A	28172	59	76	0.4	3.08926e-05	0.0496651	0.0113346	0.0322461
ENSG00000120008	rs4751802:122639311:G:A	28623	59	76	0.4	3.08926e-05	0.0496651	0.0113346	0.0322461
ENSG00000120008	rs10886793:122641884:A:G	31196	59	76	0.4	3.08926e-05	0.0496651	0.0113346	0.0322461
ENSG00000120008	10:122642056:G:GTTTTGT	31368	57	73	0.384211	1.2002e-05	0.052065	0.0112535	0.0168244
ENSG00000120008	rs7079781:122646126:G:A	35438	59	76	0.4	3.08926e-05	0.0496651	0.0113346	0.0322461
ENSG00000120008	rs7067719:122646738:T:G	36050	59	76	0.4	3.08926e-05	0.0496651	0.0113346	0.0322461
ENSG00000120008	10:122649699	39011	59	76	0.4	3.08926e-05	0.0496651	0.0113346	0.0322461
ENSG00000120008	rs4752472:122650655:A:C	39967	59	76	0.4	3.08926e-05	0.0496651	0.0113346	0.0322461
ENSG00000120008	rs11199630:122653107:C:A	42419	66	86	0.452632	5.38639e-05	0.048883	0.0115452	0.0466503
ENSG00000120008	rs6585673:122657938:A:G	47250	59	76	0.4	3.08926e-05	0.0496651	0.0113346	0.0322461
ENSG00000120008	rs3781246:122658347:A:G	47659	59	76	0.4	3.08926e-05	0.0496651	0.0113346	0.0322461
ENSG00000120008	rs11199634:122659078:T:C	48390	59	76	0.4	3.08926e-05	0.0496651	0.0113346	0.0322461
ENSG00000120008	rs3740306:122665310:T:A	54622	59	76	0.4	3.20598e-05	0.0495559	0.0113349	0.0331475
ENSG00000120008	rs1045154:122668604:G:A	57916	59	76	0.4	3.30951e-05	0.0494352	0.011329	0.0338676
ENSG00000120008	rs1045170:122668782:G:T	58094	59	76	0.4	3.30951e-05	0.0494352	0.011329	0.0338676
ENSG00000120008	rs34035387:122669715:CT:C	59027	59	76	0.4	3.30951e-05	0.0494352	0.011329	0.0338676
ENSG00000120008	rs200367988:122674849:G:A	64161	58	75	0.394737	3.84632e-05	0.048841	0.0112957	0.0372068
ENSG00000120008	rs12250736:122676571:C:T	65883	59	76	0.4	3.27888e-05	0.0494567	0.0113276	0.0336482
ENSG00000120008	rs12250981:122676901:C:T	66213	59	76	0.4	3.27888e-05	0.0494567	0.0113276	0.0336482
ENSG00000120008	rs10788129:122677868:G:A	67180	59	76	0.4	3.27888e-05	0.0494567	0.0113276	0.0336482
ENSG00000107669	rs4520534:123579012:G:T	79072	43	51	0.268421	4.64207e-05	0.0415106	0.00971267	0.0421833
ENSG00000107669	rs10886992:123582179:T:C	82239	43	51	0.268421	4.63862e-05	0.0414487	0.00969774	0.0421651
ENSG00000107669	rs6585762:123582626:C:A	82686	43	51	0.268421	4.64962e-05	0.0414603	0.00970189	0.0422259
ENSG00000107669	rs7476932	84252	43	51	0.268421	4.66402e-05	0.0414004	0.00968976	0.0423228
ENSG00000182022	rs7092302:125762842:C:G	-4343	39	44	0.231579	3.93354e-05	0.127307	0.0294833	0.0376963
ENSG00000182022	rs7082601:125762894:A:C	-4291	39	45	0.236842	3.42162e-05	0.125699	0.0288643	0.034631
ENSG00000182022	rs7082589:125762915:A:G	-4270	39	45	0.236842	3.42162e-05	0.125699	0.0288643	0.034631
ENSG00000065154	rs17616507:125533919:A:C	-551954	13	13	0.0684211	5.86412e-05	-0.167971	0.0398864	0.0494005
ENSG00000188690	rs12356233:127534930:A:G	57783	60	74	0.389474	3.80601e-05	-0.0763293	0.0176417	0.0370663
ENSG00000188690	rs10794027:127536562:C:T	59415	60	74	0.389474	4.10093e-05	-0.075856	0.0176128	0.0388171
ENSG00000188690	rs11244671:127538973:C:T	61826	60	74	0.389474	4.10093e-05	-0.075856	0.0176128	0.0388171
ENSG00000188690	rs10794028:127550491:T:C	73344	60	74	0.389474	4.26301e-05	-0.0758839	0.0176616	0.0397818
ENSG00000170430	rs7906680:131442671:C:G	177222	66	86	0.452632	4.32324e-05	-0.111513	0.0259766	0.0402118
ENSG00000170430	rs7074106:131443520:T:A	178071	66	86	0.452632	4.30249e-05	-0.111516	0.0259695	0.0400611
ENSG00000170430	rs11016853:131443990:A:G	178541	65	83	0.436842	1.66409e-05	-0.118876	0.0261681	0.0210181
ENSG00000170430	rs12265758:131445144:A:G	179695	66	85	0.447368	1.62905e-05	-0.118193	0.0259864	0.0207496
ENSG00000170430	rs12265939:131445398:A:G	179949	66	86	0.452632	4.26178e-05	-0.11152	0.0259553	0.0397733
ENSG00000170430	rs7905095	182694	66	86	0.452632	4.26178e-05	-0.11152	0.0259553	0.0397733
ENSG00000148814	rs12269628:134130159:C:T	-15456	26	27	0.142105	5.99071e-06	0.237402	0.0494381	0.0104362
ENSG00000148814	rs76502537:134139068:A:G	-6547	30	32	0.168421	1.37939e-06	0.232004	0.0449427	0.00367854
ENSG00000148814	rs6560691:134140245:A:G	-5370	33	37	0.194737	5.06286e-05	0.18262	0.0429626	0.0447532
ENSG00000148814	rs76805118:134144739:G:A	-876	32	33	0.173684	4.13043e-06	0.227727	0.0465272	0.00821859
ENSG00000148814	rs71013522:134145441:C:CT	-174	32	33	0.173684	4.22296e-06	0.227489	0.0465307	0.00833379
ENSG00000148814	rs3923974:134146084:C:T	469	32	33	0.173684	4.31193e-06	0.227286	0.0465383	0.00845177
ENSG00000148814	rs2295273:134150920:T:G	5305	32	33	0.173684	4.43166e-06	0.226939	0.046532	0.00863343
ENSG00000148814	rs7098749:134157220:G:A	11605	32	33	0.173684	4.67902e-06	0.227291	0.0467333	0.00900041
ENSG00000148814	rs11146339:134158448:G:A	12833	32	33	0.173684	4.7272e-06	0.227164	0.0467317	0.00906936
ENSG00000148814	rs7090409:134164622:C:T	19007	32	33	0.173684	4.83948e-06	0.227143	0.0467835	0.00918089
ENSG00000148814	rs56678407:134167502:C:A	21887	32	33	0.173684	5.18175e-06	0.226886	0.0468947	0.00956987
ENSG00000239665	rs10906431:13674143:C:G	22095	40	43	0.226316	5.0242e-05	0.119768	0.0281626	0.0445524
ENSG00000239665	rs10906432:13674147:C:G	22099	40	43	0.226316	5.0242e-05	0.119768	0.0281626	0.0445524
ENSG00000239665	rs4750392:13683386:A:G	31338	64	78	0.410526	5.3134e-05	-0.0989337	0.0233459	0.04621
ENSG00000239665	rs35678352:13683515:C:CT	31467	64	78	0.410526	5.31133e-05	-0.098981	0.0233565	0.0462055
ENSG00000239665	rs11258492:13684705:G:A	32657	64	78	0.410526	5.56502e-05	-0.0990894	0.0234514	0.0476434
ENSG00000239665	rs11258494:13684905:A:G	32857	64	78	0.410526	5.58305e-05	-0.0991055	0.02346	0.047752
ENSG00000239665	rs10508464:13685076:T:C	33028	64	78	0.410526	5.58305e-05	-0.0991055	0.02346	0.047752
ENSG00000239665	rs10508465:13685188:C:T	33140	64	77	0.405263	3.94829e-05	-0.102239	0.0236833	0.0378095
ENSG00000239665	rs4626964:13685551:A:G	33503	64	78	0.410526	5.48946e-05	-0.0991889	0.0234546	0.0472027
ENSG00000239665	rs13005:13685766:G:A	33718	64	78	0.410526	5.48946e-05	-0.0991889	0.0234546	0.0472027
ENSG00000239665	rs4748048:13686683:A:G	34635	64	78	0.410526	5.3978e-05	-0.0992986	0.0234554	0.0467049
ENSG00000107614	rs11316102:17176321:GC:G	-7933	33	40	0.210526	2.5103e-05	-0.118253	0.0266568	0.0279538
ENSG00000107614	rs7096692:17180828:G:A	-3426	33	40	0.210526	2.27564e-05	-0.118361	0.0265281	0.0261235
ENSG00000107614	rs7100163:17181177:C:T	-3077	33	40	0.210526	2.48676e-05	-0.11811	0.0266099	0.0277699
ENSG00000107614	rs34434809:17187634:G:C	3380	34	41	0.215789	2.48633e-05	-0.115474	0.0260158	0.027766
ENSG00000107614	rs12773642:17196055:T:C	11801	35	42	0.221053	2.62634e-05	-0.114873	0.0259641	0.0288645
ENSG00000107614	rs7894268:17199830:A:C	15576	35	42	0.221053	2.66215e-05	-0.114754	0.0259579	0.0291036
ENSG00000107614	rs17140062:17202840:T:A	18586	35	42	0.221053	2.53396e-05	-0.115264	0.0259974	0.0281341
ENSG00000107614	rs35062783:17202869:A:C	18615	35	42	0.221053	2.53396e-05	-0.115264	0.0259974	0.0281341
ENSG00000107614	rs3752950:17203356:G:T	19102	35	42	0.221053	2.66927e-05	-0.114504	0.0259055	0.0291141
ENSG00000107614	rs7912093:17203934:A:T	19680	34	41	0.215789	2.55492e-05	-0.11644	0.0262755	0.0282769
ENSG00000107614	rs33993216:17204139:G:A	19885	34	41	0.215789	2.55492e-05	-0.11644	0.0262755	0.0282769
ENSG00000107614	rs12771477:17209464:T:C	25210	35	42	0.221053	2.69614e-05	-0.114425	0.025903	0.0292915
ENSG00000107614	rs45472399:17209967:G:A	25713	35	42	0.221053	2.68847e-05	-0.114424	0.0258983	0.0292333
ENSG00000107614	rs35932553:17213315:A:T	29061	34	41	0.215789	2.58086e-05	-0.11636	0.026273	0.0285022
ENSG00000107614	rs12783490:17223716:T:A	39462	34	41	0.215789	2.90562e-05	-0.115638	0.0262942	0.0309549
ENSG00000107614	rs56015036:17226767:T:C	42513	35	42	0.221053	2.75576e-05	-0.114567	0.0259688	0.0297586
ENSG00000107614	rs7921162:17229004:A:G	44750	35	42	0.221053	2.84211e-05	-0.114354	0.0259681	0.0304733
ENSG00000107614	rs7082376:17232223:C:T	47969	34	41	0.215789	2.99718e-05	-0.115421	0.0262936	0.031584
ENSG00000107614	rs10490958	49196	34	41	0.215789	2.96102e-05	-0.113843	0.0259153	0.0313315
ENSG00000107614	rs7912064:17233916:C:T	49662	34	41	0.215789	2.99718e-05	-0.115421	0.0262936	0.031584
ENSG00000107614	rs4133467:17235233:A:G	50979	35	42	0.221053	3.12981e-05	-0.113385	0.0258971	0.032558
ENSG00000107614	rs141254914:17235313:GATTAAGC:G	51059	36	43	0.226316	4.74599e-05	-0.110825	0.0259668	0.0428298
ENSG00000107614	rs7072634:17240918:C:A	56664	34	41	0.215789	2.96102e-05	-0.113843	0.0259153	0.0313315
ENSG00000107614	rs17381591:17244048:T:C	59794	34	41	0.215789	2.96102e-05	-0.113843	0.0259153	0.0313315
ENSG00000107614	rs17466418:17244307:G:T	60053	34	41	0.215789	2.96102e-05	-0.113843	0.0259153	0.0313315
ENSG00000107614	rs11818636:17244898:C:T	60644	34	41	0.215789	2.96102e-05	-0.113843	0.0259153	0.0313315
ENSG00000107614	rs11813029:17244915:T:C	60661	34	41	0.215789	2.96102e-05	-0.113843	0.0259153	0.0313315
ENSG00000107614	rs57751544:17245120:A:G	60866	35	42	0.221053	2.39692e-05	-0.115301	0.0259209	0.0270824
ENSG00000107614	rs34709865:17245329:T:C	61075	35	42	0.221053	2.39692e-05	-0.115301	0.0259209	0.0270824
ENSG00000107614	rs1885393:17247573:A:G	63319	34	41	0.215789	2.96102e-05	-0.113843	0.0259153	0.0313315
ENSG00000107959	rs7917172:3147926:C:T	-31995	17	18	0.0947368	4.06844e-05	-0.13592	0.0315434	0.0385983
ENSG00000107959	rs7907949:3148056:G:A	-31865	17	18	0.0947368	4.37967e-05	-0.135462	0.031581	0.0405491
ENSG00000057608	rs59903975:5125283:TAC:T	-681904	23	24	0.126316	5.15426e-05	0.0513016	0.0120827	0.0453281
ENSG00000057608	rs7478670:5125538:T:C	-681649	23	24	0.126316	5.74666e-05	0.0511113	0.0121212	0.0486606
ENSG00000057608	rs7907985:5126278:G:A	-680909	23	24	0.126316	5.15426e-05	0.0513016	0.0120827	0.0453281
ENSG00000057608	rs4880705:5126436:G:A	-680751	23	24	0.126316	5.15426e-05	0.0513016	0.0120827	0.0453281
ENSG00000057608	rs10904414:5129270:G:A	-677917	23	24	0.126316	5.25741e-05	0.0512194	0.0120784	0.0459526
ENSG00000057608	rs61854729:5232942:T:C	-574245	21	21	0.110526	1.14595e-05	0.0611436	0.0131822	0.0162277
ENSG00000057608	rs61854731:5234161:A:G	-573026	20	20	0.105263	2.6512e-05	0.0597552	0.0135136	0.0290474
ENSG00000057608	rs76848149:5234406:G:A	-572781	20	20	0.105263	2.66062e-05	0.0597204	0.0135086	0.0290925
ENSG00000057608	rs61854733:5235533:T:C	-571654	21	21	0.110526	1.19884e-05	0.0607351	0.0131267	0.0168074
ENSG00000057608	rs61854734:5235594:A:G	-571593	21	21	0.110526	1.19884e-05	0.0607351	0.0131267	0.0168074
ENSG00000057608	rs61854735:5235762:T:A	-571425	21	21	0.110526	1.20437e-05	0.0606966	0.0131217	0.0168676
ENSG00000057608	rs61854736:5235824:G:T	-571363	21	21	0.110526	1.20437e-05	0.0606966	0.0131217	0.0168676
ENSG00000057608	rs61854737:5236130:G:A	-571057	21	21	0.110526	1.21595e-05	0.0606176	0.0131116	0.016988
ENSG00000136758	rs10829053:26992105:G:A	-407279	25	27	0.142105	4.02916e-05	-0.0440431	0.0102152	0.038343
ENSG00000136758	rs7090448:26992283:A:T	-407101	25	27	0.142105	4.04372e-05	-0.0440247	0.0102132	0.03843
ENSG00000136758	rs74985049:26992953:G:A	-406431	24	26	0.136842	3.00741e-05	-0.0455595	0.0103809	0.0316479
ENSG00000136758	rs12252759:26993037:C:T	-406347	25	27	0.142105	3.9954e-05	-0.0440335	0.0102076	0.0381192
ENSG00000136758	rs11015236	-406304	25	27	0.142105	3.50863e-05	-0.0442728	0.0101819	0.0352299
ENSG00000136758	rs6482571:26993728:G:A	-405656	25	27	0.142105	4.19756e-05	-0.0439702	0.010224	0.0393505
ENSG00000136758	rs12245888:26995048:C:T	-404336	26	28	0.147368	4.18323e-05	-0.0438948	0.0102043	0.0392439
ENSG00000136758	rs11015237:26995255:T:C	-404129	26	28	0.147368	5.0321e-05	-0.0435198	0.0102344	0.0445866
ENSG00000136758	rs11015238:26995422:C:T	-403962	27	29	0.152632	5.17931e-05	-0.0434343	0.0102329	0.045477
ENSG00000136758	rs11015239:26997043:T:C	-402341	26	28	0.147368	4.67386e-05	-0.043529	0.0101893	0.0423918
ENSG00000120539	rs7071525:27262891:C:T	-180863	21	23	0.121053	1.42554e-05	-0.158235	0.03453	0.0190814
ENSG00000120539	rs10829150:27264403:A:G	-179351	21	23	0.121053	1.9053e-05	-0.156326	0.0346789	0.0231859
ENSG00000120539	10:27265641	-178113	21	23	0.121053	1.9053e-05	-0.156326	0.0346789	0.0231859
ENSG00000120539	rs1573141:27268917:T:C	-174837	21	23	0.121053	1.94742e-05	-0.156199	0.0346943	0.0235595
ENSG00000120539	rs2183335:27268930:T:C	-174824	21	23	0.121053	1.94742e-05	-0.156199	0.0346943	0.0235595
ENSG00000120539	rs11527776:27286000:T:A	-157754	18	20	0.105263	8.9928e-06	-0.168651	0.0358843	0.0136028
ENSG00000224597	rs2768665:29679179:T:C	-19153	48	53	0.278947	3.04095e-05	-0.1113	0.0253768	0.0318909
ENSG00000224597	rs2796330:29679692:G:A	-18640	48	53	0.278947	2.48148e-05	-0.111232	0.0250572	0.0277215
ENSG00000224597	rs6481580:29686238:C:T	-12094	46	51	0.268421	5.71537e-05	0.105577	0.0250293	0.048505
ENSG00000224597	rs1858567:29695366:T:C	-2966	49	55	0.289474	3.94093e-05	0.1047	0.0242506	0.0377502
ENSG00000224597	rs72201092:29704035:TAGG:T	5703	45	50	0.263158	5.77704e-05	0.10539	0.025002	0.0488561
ENSG00000224597	rs2182400:29707551:A:G	9219	47	52	0.273684	5.79049e-05	0.106018	0.0251548	0.0489383
ENSG00000224597	rs35149222:29708885:A:AT	10553	46	51	0.268421	5.32074e-05	0.106765	0.0251962	0.0462623
ENSG00000224597	rs7081352:29714509:C:T	16177	45	50	0.263158	5.00942e-05	0.106441	0.0250244	0.0444476
ENSG00000224597	rs78111184:29715194:GAC:G	16862	45	50	0.263158	5.00942e-05	0.106441	0.0250244	0.0444476
ENSG00000224597	rs11007573:29719872:G:A	21540	47	52	0.273684	5.89109e-05	0.106095	0.0252007	0.0495485
ENSG00000224597	rs10763718:29743637:C:T	45305	47	52	0.273684	5.83124e-05	0.106157	0.025199	0.049183
ENSG00000224597	rs367876322:29744631:GCTCACTGCAACATCGGC:G	46299	47	51	0.268421	4.78739e-05	0.107624	0.0252305	0.043066
ENSG00000224597	rs149992010:29746346:C:CTGTT	48014	47	51	0.268421	5.80925e-05	0.10621	0.0252055	0.0490386
ENSG00000224597	rs10826627:29753169:C:T	54837	45	50	0.263158	4.55458e-05	0.106854	0.0249721	0.0417107
ENSG00000224597	rs3780854:29758785:G:A	60453	45	50	0.263158	4.4735e-05	0.106599	0.0248848	0.041221
ENSG00000224597	rs6481595:29760651:T:G	62319	47	52	0.273684	5.23684e-05	0.105934	0.0249749	0.0458161
ENSG00000224597	rs10826636:29772521:A:G	74189	47	52	0.273684	4.93395e-05	0.106455	0.0250036	0.043993
ENSG00000273038	rs3004209:32710337:T:C	-465853	27	30	0.157895	5.74204e-05	-0.306826	0.0727612	0.0486364
ENSG00000273038	rs2490483:32711206:T:C	-464984	58	81	0.426316	1.5309e-07	0.26174	0.0460825	0.000777813
ENSG00000273038	rs2490484:32712182:G:A	-464008	58	81	0.426316	1.53575e-07	0.261664	0.0460751	0.000777813
ENSG00000273038	rs2490485:32712807:T:C	-463383	64	87	0.457895	1.33091e-07	0.274695	0.0480906	0.000713485
ENSG00000273038	rs71027085:32713475:CT:C	-462715	58	81	0.426316	1.58183e-07	0.261671	0.0461318	0.000791848
ENSG00000273038	rs2505389:32714338:T:C	-461852	67	94	0.494737	3.14299e-07	0.263058	0.0477167	0.00127411
ENSG00000273038	rs2505391:32714751:C:T	-461439	67	94	0.494737	3.14299e-07	0.263058	0.0477167	0.00127411
ENSG00000273038	rs3123649:32715874:T:C	-460316	59	83	0.436842	1.17777e-07	0.262534	0.0457369	0.000655558
ENSG00000273038	rs7087800:32716833:C:T	-459357	55	67	0.352632	9.7272e-06	-0.260545	0.0556721	0.0144019
ENSG00000273038	rs2505395:32719350:T:C	-456840	59	83	0.436842	1.17514e-07	0.262511	0.0457287	0.000654503
ENSG00000273038	rs2490490:32720403:A:T	-455787	58	81	0.426316	1.51953e-07	0.261641	0.0460512	0.000774905
ENSG00000273038	rs2505397:32720586:T:C	-455604	59	83	0.436842	1.1753e-07	0.262521	0.0457306	0.000654503
ENSG00000273038	rs2490493:32723273:C:A	-452917	58	81	0.426316	1.52105e-07	0.261548	0.0460368	0.000775163
ENSG00000273038	rs17575224:32723278:T:G	-452912	58	81	0.426316	1.52609e-07	0.261537	0.046041	0.000777129
ENSG00000273038	rs2505375:32723280:T:G	-452910	58	81	0.426316	1.5003e-07	0.26169	0.046036	0.000768715
ENSG00000273038	rs2505371:32724228:A:T	-451962	59	83	0.436842	1.16884e-07	0.26253	0.0457221	0.000651923
ENSG00000273038	rs2505370:32724872:T:G	-451318	58	81	0.426316	1.52699e-07	0.261497	0.0460351	0.000777262
ENSG00000273038	rs2490495:32726529:G:C	-449661	59	83	0.436842	1.16971e-07	0.262488	0.0457163	0.00065224
ENSG00000273038	rs2490499:32730800:A:G	-445390	59	83	0.436842	1.19434e-07	0.262239	0.0457109	0.000662234
ENSG00000273038	rs71515559:32733061:AG:A	-443129	59	83	0.436842	1.19551e-07	0.262205	0.0457068	0.000662303
ENSG00000273038	rs12777053:32733063:A:T	-443127	59	83	0.436842	1.19551e-07	0.262205	0.0457068	0.000662303
ENSG00000273038	rs12777221:32733064:C:T	-443126	59	83	0.436842	1.19551e-07	0.262205	0.0457068	0.000662303
ENSG00000273038	rs72363061:32735810:TTGCC:T	-440380	58	76	0.4	2.27838e-05	-0.231904	0.0519803	0.0261462
ENSG00000273038	rs2505403:32739150:A:T	-437040	65	91	0.478947	1.56386e-07	0.265982	0.0468699	0.000784582
ENSG00000273038	rs17575342:32741602:T:C	-434588	65	91	0.478947	1.57645e-07	0.265696	0.046835	0.000789617
ENSG00000273038	rs2505335:32742234:A:G	-433956	59	83	0.436842	1.18217e-07	0.261627	0.0455856	0.000657364
ENSG00000273038	rs2243926:32743146:A:G	-433044	59	85	0.447368	1.4462e-07	0.25641	0.0450403	0.000760369
ENSG00000273038	rs2505340:32743328:A:G	-432862	62	85	0.447368	1.30746e-07	0.269123	0.0470815	0.00070445
ENSG00000273038	rs3004204:32743863:T:C	-432327	38	41	0.215789	1.92221e-05	-0.306113	0.0679417	0.0233362
ENSG00000273038	rs1520546:32748660:G:A	-427530	58	81	0.426316	1.54738e-07	0.260699	0.0459193	0.000778709
ENSG00000273038	rs2460702:32750233:G:A	-425957	58	81	0.426316	1.54888e-07	0.260653	0.0459131	0.000779175
ENSG00000273038	rs2460701:32752185:G:A	-424005	64	89	0.468421	2.28134e-07	0.263093	0.0470858	0.00102292
ENSG00000273038	rs9338708:32752511:G:A	-423679	38	41	0.215789	1.94883e-05	-0.305928	0.0679543	0.0235637
ENSG00000273038	rs33997704:32753424:G:GTGTT	-422766	64	89	0.468421	3.38175e-07	0.261775	0.0476318	0.00131702
ENSG00000273038	rs9338709:32754760:C:G	-421430	55	67	0.352632	1.01644e-05	-0.258903	0.0554535	0.0148996
ENSG00000273038	rs142821488:32756359:GTTGT:G	-419831	58	81	0.426316	1.54888e-07	0.260653	0.0459131	0.000779175
ENSG00000273038	rs944823:32757518:A:T	-418672	58	73	0.384211	1.59318e-05	-0.244143	0.053611	0.0204306
ENSG00000273038	rs3030631:32757678:C:CTT	-418512	38	41	0.215789	1.94295e-05	-0.305958	0.0679492	0.0235238
ENSG00000273038	rs2460710:32759918:G:A	-416272	58	72	0.378947	1.77032e-06	0.271693	0.0532529	0.00440681
ENSG00000273038	rs2002079:32763113:G:A	-413077	38	41	0.215789	1.96161e-05	-0.305762	0.067943	0.0236733
ENSG00000273038	rs944824:32764241:C:G	-411949	58	81	0.426316	1.56479e-07	0.260597	0.0459221	0.000784582
ENSG00000273038	rs2460712:32764613:C:T	-411577	58	81	0.426316	1.56479e-07	0.260597	0.0459221	0.000784582
ENSG00000273038	rs2505384:32764985:A:T	-411205	58	81	0.426316	1.56479e-07	0.260597	0.0459221	0.000784582
ENSG00000273038	rs2505385:32766852:A:G	-409338	58	81	0.426316	1.55102e-07	0.260628	0.0459111	0.000779967
ENSG00000273038	rs2460711:32770015:T:G	-406175	58	81	0.426316	1.54028e-07	0.26067	0.0459056	0.000777813
ENSG00000273038	rs61856000:32771119:G:A	-405071	58	81	0.426316	1.54028e-07	0.26067	0.0459056	0.000777813
ENSG00000273038	rs74321069:32771123:TAAAA:T	-405067	58	81	0.426316	1.54028e-07	0.26067	0.0459056	0.000777813
ENSG00000273038	rs3123648:32771281:T:A	-404909	64	89	0.468421	2.26507e-07	0.263024	0.0470594	0.00101692
ENSG00000273038	rs61655119:32771317:ACTTT:A	-404873	38	41	0.215789	1.94627e-05	-0.305773	0.0679148	0.0235506
ENSG00000273038	rs3006726:32771367:G:T	-404823	58	73	0.384211	1.57208e-05	-0.244127	0.053567	0.0202347
ENSG00000273038	rs2203974:32773119:A:C	-403071	38	41	0.215789	1.94627e-05	-0.305773	0.0679148	0.0235506
ENSG00000273038	rs137983972:32773250:CT:C	-402940	38	41	0.215789	1.94627e-05	-0.305773	0.0679148	0.0235506
ENSG00000273038	rs139929745:32773331:C:T	-402859	58	81	0.426316	1.54028e-07	0.26067	0.0459056	0.000777813
ENSG00000273038	rs7098823:32777468:G:T	-398722	58	81	0.426316	1.54028e-07	0.26067	0.0459056	0.000777813
ENSG00000273038	rs953818:32778110:G:T	-398080	58	81	0.426316	1.54028e-07	0.26067	0.0459056	0.000777813
ENSG00000273038	rs35146486:32779265:CT:C	-396925	58	81	0.426316	1.54028e-07	0.26067	0.0459056	0.000777813
ENSG00000273038	rs2990980:32780070:A:T	-396120	56	70	0.368421	1.9819e-05	-0.242762	0.0539758	0.023864
ENSG00000273038	rs952026:32781802:C:T	-394388	58	81	0.426316	1.53686e-07	0.260649	0.0458979	0.000777813
ENSG00000273038	rs12359568:32782914:T:G	-393276	56	70	0.368421	1.97415e-05	-0.242703	0.0539505	0.0237978
ENSG00000273038	rs10827069:32783105:G:A	-393085	56	70	0.368421	1.97415e-05	-0.242703	0.0539505	0.0237978
ENSG00000273038	rs11596240:32783569:C:T	-392621	59	82	0.431579	9.38133e-08	0.266177	0.0459543	0.000566694
ENSG00000273038	rs142701953:32783684:T:TG	-392506	58	81	0.426316	1.44826e-07	0.261338	0.0459086	0.000760526
ENSG00000273038	rs3006713:32787808:T:C	-388382	58	73	0.384211	1.57102e-05	-0.244007	0.0535387	0.0202238
ENSG00000273038	rs11008951:32788047:G:A	-388143	58	81	0.426316	1.53844e-07	0.260603	0.0458916	0.000777813
ENSG00000273038	rs2947086:32788220:G:A	-387970	56	70	0.368421	1.98103e-05	-0.242636	0.0539464	0.0238599
ENSG00000273038	rs2370775:32789497:G:T	-386693	38	41	0.215789	1.92833e-05	-0.305744	0.0678723	0.0233832
ENSG00000273038	rs4016794:32789798:C:G	-386392	38	41	0.215789	1.92833e-05	-0.305744	0.0678723	0.0233832
ENSG00000273038	rs7090007:32791058:T:G	-385132	58	73	0.384211	1.5657e-05	-0.243982	0.0535229	0.0201712
ENSG00000273038	rs11597869:32791145:C:T	-385045	58	81	0.426316	1.53844e-07	0.260603	0.0458916	0.000777813
ENSG00000273038	rs11597882:32791192:C:T	-384998	58	81	0.426316	1.53844e-07	0.260603	0.0458916	0.000777813
ENSG00000273038	rs4486524:32793421:A:C	-382769	58	81	0.426316	1.53844e-07	0.260603	0.0458916	0.000777813
ENSG00000273038	rs11008954:32794313:A:C	-381877	58	81	0.426316	2.03865e-07	0.260215	0.0463543	0.000940986
ENSG00000273038	rs11522445:32794918:C:T	-381272	58	81	0.426316	1.53844e-07	0.260603	0.0458916	0.000777813
ENSG00000273038	rs12779002:32795079:G:A	-381111	58	81	0.426316	1.53844e-07	0.260603	0.0458916	0.000777813
ENSG00000273038	rs2947089:32795266:G:A	-380924	38	41	0.215789	1.94697e-05	-0.305547	0.067866	0.0235574
ENSG00000273038	rs140718865:32795375:G:A	-380815	58	81	0.426316	1.53844e-07	0.260603	0.0458916	0.000777813
ENSG00000273038	rs61856031:32798083:T:C	-378107	58	81	0.426316	1.53469e-07	0.260631	0.0458919	0.000777813
ENSG00000273038	rs10740855	-377243	58	73	0.384211	1.5657e-05	-0.243982	0.0535229	0.0201712
ENSG00000273038	rs12781874:32799109:C:A	-377081	58	81	0.426316	1.53469e-07	0.260631	0.0458919	0.000777813
ENSG00000273038	rs11592015:32800714:C:T	-375476	58	81	0.426316	1.53469e-07	0.260631	0.0458919	0.000777813
ENSG00000273038	rs11596289:32800732:A:G	-375458	58	81	0.426316	1.53469e-07	0.260631	0.0458919	0.000777813
ENSG00000273038	rs11592052:32800766:G:A	-375424	58	81	0.426316	1.542e-07	0.2606	0.0458953	0.000777813
ENSG00000273038	rs12761944:32803484:G:T	-372706	58	81	0.426316	1.53266e-07	0.260667	0.0458959	0.000777813
ENSG00000273038	rs7075553:32804322:G:A	-371868	58	73	0.384211	1.5657e-05	-0.243982	0.0535229	0.0201712
ENSG00000273038	rs11008956:32806538:G:A	-369652	58	81	0.426316	1.5353e-07	0.260636	0.0458936	0.000777813
ENSG00000273038	rs2990984:32806972:C:T	-369218	55	67	0.352632	9.42599e-06	-0.258455	0.0551316	0.0140314
ENSG00000273038	rs35939392:32808506:TA:T	-367684	38	41	0.215789	1.63019e-05	-0.308462	0.0678226	0.0207526
ENSG00000273038	rs11008957:32812068:C:T	-364122	37	40	0.210526	8.97411e-06	-0.317109	0.0674645	0.0135817
ENSG00000273038	rs11008958:32812620:C:T	-363570	58	81	0.426316	1.51969e-07	0.26074	0.0458928	0.000774905
ENSG00000273038	rs11008959:32812631:A:G	-363559	58	81	0.426316	1.51969e-07	0.26074	0.0458928	0.000774905
ENSG00000273038	rs11008961:32814137:T:C	-362053	61	81	0.426316	1.94085e-05	-0.22955	0.0509769	0.0235017
ENSG00000273038	rs35912744:32815767:C:A	-360423	58	81	0.426316	1.51969e-07	0.26074	0.0458928	0.000774905
ENSG00000273038	rs12761283:32817608:G:A	-358582	61	80	0.421053	1.99464e-05	-0.233128	0.0518529	0.0239282
ENSG00000273038	rs61856037:32817686:G:A	-358504	58	81	0.426316	1.53789e-07	0.260974	0.0459563	0.000777813
ENSG00000273038	rs11008962:32818749:G:A	-357441	58	81	0.426316	1.53789e-07	0.260974	0.0459563	0.000777813
ENSG00000273038	rs11524329:32818817:T:G	-357373	58	81	0.426316	1.53789e-07	0.260974	0.0459563	0.000777813
ENSG00000273038	rs10827073:32819509:G:A	-356681	37	40	0.210526	8.71873e-06	-0.317655	0.0674759	0.0133143
ENSG00000273038	rs1537411:32824413:G:T	-351777	58	81	0.426316	1.51969e-07	0.26074	0.0458928	0.000774905
ENSG00000273038	rs10827074:32825502:G:A	-350688	58	81	0.426316	1.51969e-07	0.26074	0.0458928	0.000774905
ENSG00000273038	rs7910275:32827578:C:T	-348612	58	73	0.384211	1.5657e-05	-0.243982	0.0535229	0.0201712
ENSG00000273038	rs74655328:32829078:CTCTT:C	-347112	37	40	0.210526	8.71873e-06	-0.317655	0.0674759	0.0133143
ENSG00000273038	rs2990986:32832214:G:A	-343976	58	73	0.384211	1.5657e-05	-0.243982	0.0535229	0.0201712
ENSG00000273038	rs2947068:32834106:G:T	-342084	37	40	0.210526	8.71873e-06	-0.317655	0.0674759	0.0133143
ENSG00000273038	rs4497290:32834571:C:T	-341619	58	81	0.426316	1.52047e-07	0.260744	0.0458945	0.000774983
ENSG00000273038	rs1831771:32834576:G:A	-341614	58	73	0.384211	1.5657e-05	-0.243982	0.0535229	0.0201712
ENSG00000273038	rs2947069:32835308:G:C	-340882	37	40	0.210526	8.71873e-06	-0.317655	0.0674759	0.0133143
ENSG00000273038	rs2947071:32837108:T:C	-339082	37	40	0.210526	8.71873e-06	-0.317655	0.0674759	0.0133143
ENSG00000273038	rs35668546:32837731:A:G	-338459	58	81	0.426316	1.52606e-07	0.26105	0.0459553	0.000777129
ENSG00000273038	rs12360215:32839136:C:T	-337054	58	81	0.426316	1.51783e-07	0.26081	0.0459029	0.000774793
ENSG00000273038	rs3006709:32840078:G:T	-336112	58	73	0.384211	1.5657e-05	-0.243982	0.0535229	0.0201712
ENSG00000273038	rs1831774:32841671:G:A	-334519	55	66	0.347368	3.13602e-06	-0.275574	0.0555324	0.00678562
ENSG00000273038	rs11008975:32844796:C:G	-331394	58	81	0.426316	1.50447e-07	0.260841	0.0458919	0.000769603
ENSG00000273038	rs36002530:32846168:AAT:A	-330022	58	81	0.426316	1.50533e-07	0.260844	0.0458935	0.000769792
ENSG00000273038	rs2370782	-329936	37	40	0.210526	8.71873e-06	-0.317655	0.0674759	0.0133143
ENSG00000273038	rs2947080:32847962:G:C	-328228	54	65	0.342105	4.28896e-06	-0.272908	0.0558646	0.00842076
ENSG00000273038	rs140891051:32849404:A:G	-326786	58	73	0.384211	1.5657e-05	-0.243982	0.0535229	0.0201712
ENSG00000273038	rs3006711:32849894:G:T	-326296	55	66	0.347368	3.13602e-06	-0.275574	0.0555324	0.00678562
ENSG00000273038	rs144989150:32850007:G:A	-326183	58	81	0.426316	1.52009e-07	0.261057	0.0459492	0.000774905
ENSG00000273038	rs149078236:32850434:C:A	-325756	58	81	0.426316	1.52009e-07	0.261057	0.0459492	0.000774905
ENSG00000273038	rs146743829:32851398:A:G	-324792	58	81	0.426316	1.52009e-07	0.261057	0.0459492	0.000774905
ENSG00000273038	rs143438311:32852022:G:C	-324168	58	81	0.426316	1.50206e-07	0.260823	0.0458857	0.00076914
ENSG00000273038	rs2887849:32853729:A:T	-322461	37	40	0.210526	8.71873e-06	-0.317655	0.0674759	0.0133143
ENSG00000273038	rs12774663:32855845:A:G	-320345	58	81	0.426316	1.48641e-07	0.260919	0.0458831	0.000764137
ENSG00000273038	rs201498063:32855927:A:AAT	-320263	58	73	0.384211	1.5657e-05	-0.243982	0.0535229	0.0201712
ENSG00000273038	rs7905323:32856123:G:T	-320067	58	73	0.384211	1.5657e-05	-0.243982	0.0535229	0.0201712
ENSG00000273038	rs7905485:32856405:C:T	-319785	37	40	0.210526	8.71873e-06	-0.317655	0.0674759	0.0133143
ENSG00000273038	rs12414582:32858728:C:T	-317462	58	81	0.426316	1.48734e-07	0.260921	0.0458846	0.000764137
ENSG00000273038	rs1333222:32860350:G:A	-315840	58	73	0.384211	1.7018e-05	-0.243106	0.0535832	0.0213234
ENSG00000273038	rs35674897:32861271:A:T	-314919	58	81	0.426316	1.48734e-07	0.260921	0.0458846	0.000764137
ENSG00000273038	rs12146353:32861634:G:A	-314556	58	81	0.426316	1.48734e-07	0.260921	0.0458846	0.000764137
ENSG00000273038	rs11008980:32862180:C:T	-314010	58	81	0.426316	1.48734e-07	0.260921	0.0458846	0.000764137
ENSG00000273038	rs1333223:32862360:T:G	-313830	58	81	0.426316	1.48734e-07	0.260921	0.0458846	0.000764137
ENSG00000273038	rs12146257:32863171:A:G	-313019	58	81	0.426316	1.48734e-07	0.260921	0.0458846	0.000764137
ENSG00000273038	rs10508775	-311460	58	81	0.426316	1.48734e-07	0.260921	0.0458846	0.000764137
ENSG00000273038	rs12359723:32868019:C:G	-308171	58	81	0.426316	1.48734e-07	0.260921	0.0458846	0.000764137
ENSG00000273038	rs35561746:32868794:A:G	-307396	58	81	0.426316	1.48734e-07	0.260921	0.0458846	0.000764137
ENSG00000273038	rs36063520:32872823:A:G	-303367	58	81	0.426316	1.48734e-07	0.260921	0.0458846	0.000764137
ENSG00000273038	rs35538955:32874639:T:G	-301551	58	81	0.426316	1.4825e-07	0.260998	0.0458921	0.000764137
ENSG00000273038	rs34790422:32875981:T:C	-300209	58	81	0.426316	1.48734e-07	0.260921	0.0458846	0.000764137
ENSG00000273038	rs138928507:32879250:T:TAAC	-296940	58	81	0.426316	1.45886e-07	0.261554	0.04596	0.000764137
ENSG00000273038	rs11008985:32880139:A:G	-296051	58	81	0.426316	1.48734e-07	0.260921	0.0458846	0.000764137
ENSG00000273038	rs7100338:32881544:T:C	-294646	58	81	0.426316	1.48734e-07	0.260921	0.0458846	0.000764137
ENSG00000273038	rs2947059:32881982:G:T	-294208	57	71	0.373684	1.97518e-05	-0.243879	0.0542136	0.0238055
ENSG00000273038	rs4749731:32882305:T:C	-293885	57	71	0.373684	1.97518e-05	-0.243879	0.0542136	0.0238055
ENSG00000273038	rs2484272:32882807:G:A	-293383	58	81	0.426316	1.48734e-07	0.260921	0.0458846	0.000764137
ENSG00000273038	rs1759670:32885802:A:T	-290388	58	81	0.426316	1.48734e-07	0.260921	0.0458846	0.000764137
ENSG00000273038	rs1759658:32886973:C:A	-289217	58	81	0.426316	1.48734e-07	0.260921	0.0458846	0.000764137
ENSG00000273038	rs9663143	-287715	55	66	0.347368	3.13602e-06	-0.275574	0.0555324	0.00678562
ENSG00000273038	rs1716013:32890225:C:T	-285965	58	81	0.426316	1.48734e-07	0.260921	0.0458846	0.000764137
ENSG00000273038	rs1762517:32890918:A:G	-285272	58	81	0.426316	1.48734e-07	0.260921	0.0458846	0.000764137
ENSG00000273038	rs2152158:32891022:A:G	-285168	58	81	0.426316	1.50674e-07	0.260895	0.0459043	0.000770282
ENSG00000273038	rs1762516:32892592:G:A	-283598	58	81	0.426316	1.50674e-07	0.260895	0.0459043	0.000770282
ENSG00000273038	rs2990969:32894336:G:A	-281854	37	40	0.210526	8.71873e-06	-0.317655	0.0674759	0.0133143
ENSG00000273038	rs2990970:32894440:G:T	-281750	37	40	0.210526	9.89181e-06	-0.315783	0.0675367	0.0145868
ENSG00000273038	rs2992079:32897917:C:T	-278273	58	73	0.384211	1.5657e-05	-0.243982	0.0535229	0.0201712
ENSG00000273038	rs1591395:32898243:T:C	-277947	58	81	0.426316	1.48734e-07	0.260921	0.0458846	0.000764137
ENSG00000273038	rs2947060:32898690:G:A	-277500	37	40	0.210526	8.71873e-06	-0.317655	0.0674759	0.0133143
ENSG00000273038	rs2460707:32899182:G:A	-277008	58	81	0.426316	1.48734e-07	0.260921	0.0458846	0.000764137
ENSG00000273038	rs61857777:32900509:T:G	-275681	58	81	0.426316	1.48586e-07	0.261004	0.0458975	0.000764137
ENSG00000273038	rs10740858:32900543:A:G	-275647	58	73	0.384211	1.5657e-05	-0.243982	0.0535229	0.0201712
ENSG00000273038	rs11008997:32900748:T:C	-275442	37	40	0.210526	8.71873e-06	-0.317655	0.0674759	0.0133143
ENSG00000273038	rs1628278:32901230:C:A	-274960	58	81	0.426316	1.48734e-07	0.260921	0.0458846	0.000764137
ENSG00000273038	rs2947062:32901898:A:G	-274292	37	40	0.210526	8.71873e-06	-0.317655	0.0674759	0.0133143
ENSG00000273038	rs2947063:32903717:G:A	-272473	37	40	0.210526	8.71873e-06	-0.317655	0.0674759	0.0133143
ENSG00000273038	rs1759661:32903978:T:A	-272212	58	81	0.426316	1.47007e-07	0.261035	0.0458831	0.000764137
ENSG00000273038	rs2990973:32904826:A:G	-271364	37	40	0.210526	8.71873e-06	-0.317655	0.0674759	0.0133143
ENSG00000273038	rs35917081:32905910:CTGTT:C	-270280	58	81	0.426316	1.48734e-07	0.260921	0.0458846	0.000764137
ENSG00000273038	rs1762548:32908303:T:C	-267887	58	81	0.426316	1.46893e-07	0.261221	0.0459144	0.000764137
ENSG00000273038	rs2947064:32910507:C:A	-265683	58	73	0.384211	1.5657e-05	-0.243982	0.0535229	0.0201712
ENSG00000273038	rs3006749:32910716:C:T	-265474	37	40	0.210526	8.71873e-06	-0.317655	0.0674759	0.0133143
ENSG00000273038	rs7905328:32916310:G:A	-259880	55	66	0.347368	3.13602e-06	-0.275574	0.0555324	0.00678562
ENSG00000273038	rs1763788:32917853:C:T	-258337	58	81	0.426316	1.48734e-07	0.260921	0.0458846	0.000764137
ENSG00000273038	rs2222319:32920375:A:C	-255815	58	81	0.426316	1.48734e-07	0.260921	0.0458846	0.000764137
ENSG00000273038	rs71493136:32925789:G:C	-250401	58	73	0.384211	1.5657e-05	-0.243982	0.0535229	0.0201712
ENSG00000273038	rs200355261:32925810:C:T	-250380	55	66	0.347368	3.13602e-06	-0.275574	0.0555324	0.00678562
ENSG00000273038	rs9418007:32925854:T:C	-250336	58	81	0.426316	1.48734e-07	0.260921	0.0458846	0.000764137
ENSG00000273038	rs2992080:32928123:A:G	-248067	58	81	0.426316	1.54408e-07	0.26078	0.0459295	0.000777813
ENSG00000273038	rs9417072:32928718:G:A	-247472	58	81	0.426316	1.48734e-07	0.260921	0.0458846	0.000764137
ENSG00000273038	rs143371100:32930522:C:A	-245668	58	73	0.384211	1.5657e-05	-0.243982	0.0535229	0.0201712
ENSG00000273038	rs1762545:32931536:G:A	-244654	58	81	0.426316	1.48734e-07	0.260921	0.0458846	0.000764137
ENSG00000273038	rs955827:32931580:G:A	-244610	59	83	0.436842	5.33867e-07	0.250144	0.0464216	0.00184031
ENSG00000273038	rs957220:32931780:A:T	-244410	58	81	0.426316	1.48734e-07	0.260921	0.0458846	0.000764137
ENSG00000273038	rs370586132:32932949:CTCTT:C	-243241	58	81	0.426316	1.48734e-07	0.260921	0.0458846	0.000764137
ENSG00000273038	rs1591394:32933488:G:C	-242702	58	81	0.426316	1.48734e-07	0.260921	0.0458846	0.000764137
ENSG00000273038	rs1591393:32933537:A:G	-242653	58	81	0.426316	1.48734e-07	0.260921	0.0458846	0.000764137
ENSG00000273038	rs1763799:32935659:C:T	-240531	58	81	0.426316	1.48734e-07	0.260921	0.0458846	0.000764137
ENSG00000273038	rs1577372:32938382:T:C	-237808	58	81	0.426316	1.48734e-07	0.260921	0.0458846	0.000764137
ENSG00000273038	rs1335063:32941709:A:G	-234481	58	81	0.426316	1.48734e-07	0.260921	0.0458846	0.000764137
ENSG00000273038	rs4749744:32941801:T:G	-234389	55	66	0.347368	3.13602e-06	-0.275574	0.0555324	0.00678562
ENSG00000273038	rs1762542:32941932:C:A	-234258	58	81	0.426316	1.48734e-07	0.260921	0.0458846	0.000764137
ENSG00000273038	rs980117:32944387:G:T	-231803	55	66	0.347368	3.13602e-06	-0.275574	0.0555324	0.00678562
ENSG00000273038	rs3031377:32944992:C:CTTA	-231198	58	73	0.384211	1.5657e-05	-0.243982	0.0535229	0.0201712
ENSG00000273038	rs1832048:32945471:A:C	-230719	58	73	0.384211	1.57535e-05	-0.243976	0.0535402	0.0202719
ENSG00000273038	rs10734004:32945984:C:A	-230206	37	40	0.210526	8.71873e-06	-0.317655	0.0674759	0.0133143
ENSG00000273038	rs1763793:32946004:G:A	-230186	58	81	0.426316	1.48734e-07	0.260921	0.0458846	0.000764137
ENSG00000273038	rs1762539:32946262:G:A	-229928	58	81	0.426316	1.48734e-07	0.260921	0.0458846	0.000764137
ENSG00000273038	rs1763792:32946501:A:G	-229689	58	81	0.426316	1.48734e-07	0.260921	0.0458846	0.000764137
ENSG00000273038	rs1763791:32946663:G:A	-229527	58	81	0.426316	1.48734e-07	0.260921	0.0458846	0.000764137
ENSG00000273038	rs34294384:32947376:AT:A	-228814	58	73	0.384211	1.5657e-05	-0.243982	0.0535229	0.0201712
ENSG00000273038	rs1591392:32947508:A:G	-228682	58	81	0.426316	1.48734e-07	0.260921	0.0458846	0.000764137
ENSG00000273038	rs71493139:32949398:G:A	-226792	41	48	0.252632	4.57989e-05	-0.258038	0.0603251	0.0418282
ENSG00000273038	rs1413977:32951411:A:T	-224779	55	66	0.347368	3.13602e-06	-0.275574	0.0555324	0.00678562
ENSG00000273038	rs2184486:32952734:T:C	-223456	55	66	0.347368	3.13602e-06	-0.275574	0.0555324	0.00678562
ENSG00000273038	rs7089887:32952768:G:A	-223422	55	66	0.347368	3.13602e-06	-0.275574	0.0555324	0.00678562
ENSG00000273038	rs10560967:32952891:CAG:C	-223299	37	40	0.210526	8.81506e-06	-0.317567	0.0674969	0.0134258
ENSG00000273038	rs1577370:32954411:G:A	-221779	37	40	0.210526	8.71873e-06	-0.317655	0.0674759	0.0133143
ENSG00000273038	rs7899433:32955086:G:C	-221104	58	73	0.384211	1.5657e-05	-0.243982	0.0535229	0.0201712
ENSG00000273038	rs7899442:32955105:G:A	-221085	55	66	0.347368	2.95045e-06	-0.276867	0.0556249	0.00652541
ENSG00000273038	rs1762536:32955446:G:A	-220744	58	81	0.426316	1.48734e-07	0.260921	0.0458846	0.000764137
ENSG00000273038	rs7899680:32955456:C:T	-220734	55	66	0.347368	3.13602e-06	-0.275574	0.0555324	0.00678562
ENSG00000273038	rs7916317:32955471:T:C	-220719	58	73	0.384211	1.5657e-05	-0.243982	0.0535229	0.0201712
ENSG00000273038	rs9418014:32955912:T:A	-220278	58	81	0.426316	1.09765e-07	0.266762	0.046343	0.000627627
ENSG00000273038	rs3003969:32956741:G:A	-219449	58	81	0.426316	1.1987e-07	0.266369	0.0464375	0.000662936
ENSG00000273038	rs1763804:32959058:T:C	-217132	58	81	0.426316	1.48734e-07	0.260921	0.0458846	0.000764137
ENSG00000273038	rs10827098:32959844:G:A	-216346	37	40	0.210526	8.71873e-06	-0.317655	0.0674759	0.0133143
ENSG00000273038	rs1762535:32961844:C:A	-214346	58	81	0.426316	1.48734e-07	0.260921	0.0458846	0.000764137
ENSG00000273038	rs1763800:32963423:G:A	-212767	58	81	0.426316	1.48734e-07	0.260921	0.0458846	0.000764137
ENSG00000273038	rs1762532:32963485:G:A	-212705	58	81	0.426316	1.48734e-07	0.260921	0.0458846	0.000764137
ENSG00000273038	rs1627683	-212202	58	81	0.426316	1.48734e-07	0.260921	0.0458846	0.000764137
ENSG00000273038	rs1762529:32968080:C:T	-208110	58	81	0.426316	1.48734e-07	0.260921	0.0458846	0.000764137
ENSG00000273038	rs2247648:32969237:T:G	-206953	58	81	0.426316	1.48734e-07	0.260921	0.0458846	0.000764137
ENSG00000273038	rs34351891:32969355:CT:C	-206835	60	83	0.436842	3.59227e-08	0.275399	0.0458236	0.000286729
ENSG00000273038	rs1335068:32969694:A:G	-206496	58	81	0.426316	1.48734e-07	0.260921	0.0458846	0.000764137
ENSG00000273038	rs3003972:32970997:A:T	-205193	58	81	0.426316	1.48734e-07	0.260921	0.0458846	0.000764137
ENSG00000273038	rs1335066:32976264:T:A	-199926	58	81	0.426316	1.48734e-07	0.260921	0.0458846	0.000764137
ENSG00000273038	rs2784574:32976689:G:A	-199501	58	81	0.426316	1.48734e-07	0.260921	0.0458846	0.000764137
ENSG00000273038	rs1762525:32976806:A:C	-199384	58	81	0.426316	1.48734e-07	0.260921	0.0458846	0.000764137
ENSG00000273038	rs1763785:32976853:A:G	-199337	58	81	0.426316	1.48734e-07	0.260921	0.0458846	0.000764137
ENSG00000273038	rs1763784:32978136:G:A	-198054	58	81	0.426316	1.48734e-07	0.260921	0.0458846	0.000764137
ENSG00000273038	rs1762524:32979123:T:G	-197067	58	81	0.426316	1.48734e-07	0.260921	0.0458846	0.000764137
ENSG00000273038	rs1762523:32979522:A:G	-196668	58	81	0.426316	1.48734e-07	0.260921	0.0458846	0.000764137
ENSG00000273038	rs7358119:32986608:A:G	-189582	37	40	0.210526	8.71873e-06	-0.317655	0.0674759	0.0133143
ENSG00000273038	rs9663199:32988698:A:C	-187492	58	81	0.426316	1.48734e-07	0.260921	0.0458846	0.000764137
ENSG00000273038	rs4412669:32989163:G:A	-187027	37	40	0.210526	6.94399e-06	-0.321454	0.0674613	0.0114021
ENSG00000273038	rs2266060:32991776:T:G	-184414	58	81	0.426316	1.48734e-07	0.260921	0.0458846	0.000764137
ENSG00000273038	rs75073531:32991823:G:C	-184367	58	81	0.426316	1.48734e-07	0.260921	0.0458846	0.000764137
ENSG00000273038	rs149301603:32992348:C:T	-183842	58	81	0.426316	1.48734e-07	0.260921	0.0458846	0.000764137
ENSG00000273038	rs148494172:32992393:A:C	-183797	58	81	0.426316	1.48734e-07	0.260921	0.0458846	0.000764137
ENSG00000273038	rs7078469:32993084:A:C	-183106	58	73	0.384211	1.5657e-05	-0.243982	0.0535229	0.0201712
ENSG00000273038	rs1762549:32993117:G:A	-183073	58	81	0.426316	1.48734e-07	0.260921	0.0458846	0.000764137
ENSG00000273038	rs7079041:32993268:G:A	-182922	58	73	0.384211	1.5657e-05	-0.243982	0.0535229	0.0201712
ENSG00000273038	rs2784586:32993714:G:A	-182476	59	82	0.431579	2.73311e-07	0.257673	0.0464651	0.00117097
ENSG00000273038	rs1763803:32993856:A:G	-182334	58	81	0.426316	1.48734e-07	0.260921	0.0458846	0.000764137
ENSG00000273038	rs1620702:32993986:C:T	-182204	58	81	0.426316	1.48734e-07	0.260921	0.0458846	0.000764137
ENSG00000273038	rs148327576:32997287:A:G	-178903	58	81	0.426316	1.48734e-07	0.260921	0.0458846	0.000764137
ENSG00000273038	rs1335064:32999458:C:G	-176732	58	81	0.426316	1.47774e-07	0.261023	0.0458906	0.000764137
ENSG00000273038	rs1759657:33001260:C:A	-174930	58	81	0.426316	1.48734e-07	0.260921	0.0458846	0.000764137
ENSG00000273038	rs7900825:33001361:T:G	-174829	58	73	0.384211	1.5657e-05	-0.243982	0.0535229	0.0201712
ENSG00000273038	rs2484719:33004255:C:G	-171935	58	81	0.426316	1.48734e-07	0.260921	0.0458846	0.000764137
ENSG00000273038	rs11009053:33008282:C:A	-167908	58	81	0.426316	1.48734e-07	0.260921	0.0458846	0.000764137
ENSG00000273038	rs1541135	-163179	49	62	0.326316	5.11329e-05	0.228614	0.0538166	0.0450803
ENSG00000273038	rs1414549:33014085:A:C	-162105	67	89	0.468421	5.66929e-07	0.270212	0.0502782	0.00192413
ENSG00000273038	rs7078421:33015930:A:G	-160260	58	81	0.426316	1.4725e-07	0.261038	0.0458865	0.000764137
ENSG00000273038	rs2992673:33016592:A:G	-159598	49	62	0.326316	5.11329e-05	0.228614	0.0538166	0.0450803
ENSG00000273038	rs2484737:33019620:T:C	-156570	58	82	0.431579	4.66006e-07	0.249007	0.0459375	0.00165454
ENSG00000273038	rs2484736:33021290:A:G	-154900	58	81	0.426316	1.55852e-07	0.260404	0.0458807	0.000782472
ENSG00000273038	rs2484735:33025075:T:A	-151115	58	81	0.426316	1.48734e-07	0.260921	0.0458846	0.000764137
ENSG00000273038	rs4539219:33027669:T:A	-148521	37	40	0.210526	8.71873e-06	-0.317655	0.0674759	0.0133143
ENSG00000273038	rs144044312:33029864:AG:A	-146326	58	81	0.426316	1.48734e-07	0.260921	0.0458846	0.000764137
ENSG00000273038	rs2504336:33031238:T:C	-144952	62	83	0.436842	4.60092e-06	0.243204	0.0499622	0.00889172
ENSG00000273038	rs11009059:33032480:T:A	-143710	37	40	0.210526	8.71873e-06	-0.317655	0.0674759	0.0133143
ENSG00000273038	rs2484732:33036423:A:T	-139767	58	81	0.426316	1.48734e-07	0.260921	0.0458846	0.000764137
ENSG00000273038	rs2504335:33038414:A:G	-137776	64	89	0.468421	2.18496e-07	0.263189	0.0470187	0.000987444
ENSG00000273038	rs1335987:33043264:G:A	-132926	58	81	0.426316	1.48734e-07	0.260921	0.0458846	0.000764137
ENSG00000273038	rs2484730:33043772:G:A	-132418	58	81	0.426316	1.48734e-07	0.260921	0.0458846	0.000764137
ENSG00000273038	rs2484729:33043904:C:T	-132286	64	89	0.468421	2.18496e-07	0.263189	0.0470187	0.000987444
ENSG00000273038	rs2484727:33046257:C:T	-129933	58	81	0.426316	1.48734e-07	0.260921	0.0458846	0.000764137
ENSG00000273038	rs10763894:33048458:T:C	-127732	37	40	0.210526	8.92401e-06	-0.318271	0.0676913	0.013528
ENSG00000273038	rs77585081:33049224:G:A	-126966	58	81	0.426316	1.48734e-07	0.260921	0.0458846	0.000764137
ENSG00000273038	rs2484725:33054771:T:A	-121419	58	81	0.426316	1.4725e-07	0.261038	0.0458865	0.000764137
ENSG00000273038	rs2504343:33057694:G:A	-118496	58	81	0.426316	1.48734e-07	0.260921	0.0458846	0.000764137
ENSG00000273038	rs2484723:33059036:A:G	-117154	57	80	0.421053	2.41902e-07	0.257993	0.0462859	0.00106835
ENSG00000273038	rs12414958:33064238:T:A	-111952	64	89	0.468421	2.19038e-07	0.263171	0.0470204	0.00098937
ENSG00000273038	rs11009078:33065845:C:T	-110345	58	81	0.426316	1.48734e-07	0.260921	0.0458846	0.000764137
ENSG00000273038	rs11009080:33066417:T:C	-109773	64	89	0.468421	2.19038e-07	0.263171	0.0470204	0.00098937
ENSG00000273038	rs11009081:33073299:C:G	-102891	58	81	0.426316	1.32209e-07	0.26122	0.0457193	0.000710204
ENSG00000273038	rs12415361:33074534:G:A	-101656	58	81	0.426316	1.48734e-07	0.260921	0.0458846	0.000764137
ENSG00000273038	rs79864102:33076213:CAA:C	-99977	58	81	0.426316	1.48734e-07	0.260921	0.0458846	0.000764137
ENSG00000273038	rs7914502:33080104:T:C	-96086	58	73	0.384211	1.56397e-05	-0.244034	0.053531	0.0201712
ENSG00000273038	rs2105084:33083076:A:G	-93114	58	81	0.426316	1.48734e-07	0.260921	0.0458846	0.000764137
ENSG00000273038	rs10827130:33083457:C:T	-92733	58	81	0.426316	1.48734e-07	0.260921	0.0458846	0.000764137
ENSG00000273038	rs61856595:33086119:A:G	-90071	58	81	0.426316	1.48734e-07	0.260921	0.0458846	0.000764137
ENSG00000273038	rs201462465:33086674:G:GCCACTT	-89516	61	84	0.442105	6.90382e-08	0.272071	0.0464117	0.000464106
ENSG00000273038	rs11595142:33091567:T:C	-84623	58	81	0.426316	1.48734e-07	0.260921	0.0458846	0.000764137
ENSG00000273038	rs11009089:33094559:C:T	-81631	58	81	0.426316	1.48734e-07	0.260921	0.0458846	0.000764137
ENSG00000273038	rs11009090:33095473:A:G	-80717	64	89	0.468421	2.19038e-07	0.263171	0.0470204	0.00098937
ENSG00000273038	rs1889827:33096412:A:G	-79778	58	81	0.426316	1.48734e-07	0.260921	0.0458846	0.000764137
ENSG00000273038	rs1016433:33096802:G:A	-79388	58	81	0.426316	1.32715e-07	0.262134	0.0458864	0.000711804
ENSG00000273038	rs35923820:33099005:A:ACT	-77185	58	81	0.426316	1.48734e-07	0.260921	0.0458846	0.000764137
ENSG00000273038	rs12358460:33102972:G:A	-73218	58	81	0.426316	1.48639e-07	0.260932	0.0458855	0.000764137
ENSG00000273038	rs11009095:33103648:A:G	-72542	58	81	0.426316	1.48639e-07	0.260932	0.0458855	0.000764137
ENSG00000273038	rs10763898:33110388:G:T	-65802	58	81	0.426316	1.47678e-07	0.261034	0.0458914	0.000764137
ENSG00000273038	rs7919214:33111390:T:C	-64800	58	81	0.426316	1.47678e-07	0.261034	0.0458914	0.000764137
ENSG00000273038	rs7910732:33112887:C:A	-63303	64	89	0.468421	2.14874e-07	0.264173	0.0471618	0.000975215
ENSG00000273038	rs10827138:33113183:T:C	-63007	64	89	0.468421	2.11198e-07	0.264534	0.0471925	0.000963638
ENSG00000273038	rs12412365:33121125:G:A	-55065	58	81	0.426316	1.47678e-07	0.261034	0.0458914	0.000764137
ENSG00000273038	rs11009106:33123413:G:C	-52777	58	81	0.426316	1.47678e-07	0.261034	0.0458914	0.000764137
ENSG00000273038	rs11009107:33123774:T:C	-52416	58	81	0.426316	1.48734e-07	0.260921	0.0458846	0.000764137
ENSG00000273038	rs10827140:33124577:C:T	-51613	65	88	0.463158	2.84054e-09	-0.30399	0.0462565	4.8947e-05
ENSG00000273038	rs200104593:33126329:C:T	-49861	62	83	0.436842	4.56461e-06	0.243362	0.0499747	0.00883354
ENSG00000273038	rs10827141:33126842:G:A	-49348	58	81	0.426316	1.47829e-07	0.261039	0.0458941	0.000764137
ENSG00000273038	rs11009110:33128191:G:T	-47999	58	81	0.426316	1.47678e-07	0.261034	0.0458914	0.000764137
ENSG00000273038	rs11516741:33128844:A:G	-47346	58	81	0.426316	1.48734e-07	0.260921	0.0458846	0.000764137
ENSG00000273038	rs11511120:33129694:C:T	-46496	58	81	0.426316	1.47678e-07	0.261034	0.0458914	0.000764137
ENSG00000273038	rs4934747:33131103:G:A	-45087	58	81	0.426316	1.48734e-07	0.260921	0.0458846	0.000764137
ENSG00000273038	rs143895724:33132187:TATAA:T	-44003	58	81	0.426316	1.67904e-07	0.261894	0.0462834	0.000833111
ENSG00000273038	rs2995467:33135952:A:G	-40238	58	81	0.426316	1.47678e-07	0.261034	0.0458914	0.000764137
ENSG00000273038	rs3003908:33136479:C:T	-39711	58	81	0.426316	1.48734e-07	0.260921	0.0458846	0.000764137
ENSG00000273038	rs17576482:33136528:A:G	-39662	58	81	0.426316	1.48734e-07	0.260921	0.0458846	0.000764137
ENSG00000273038	rs2488294:33137515:T:G	-38675	58	81	0.426316	1.48893e-07	0.260964	0.0458942	0.000764839
ENSG00000273038	rs2504011	-38639	58	81	0.426316	1.48734e-07	0.260921	0.0458846	0.000764137
ENSG00000273038	rs2488296:33142719:A:T	-33471	58	81	0.426316	2.07138e-07	0.259345	0.0462298	0.000951466
ENSG00000273038	rs2504010:33143101:T:C	-33089	58	81	0.426316	2.07138e-07	0.259345	0.0462298	0.000951466
ENSG00000273038	rs2488297:33144478:C:T	-31712	58	81	0.426316	2.07138e-07	0.259345	0.0462298	0.000951466
ENSG00000273038	rs9417085:33147618:G:A	-28572	58	81	0.426316	2.07138e-07	0.259345	0.0462298	0.000951466
ENSG00000273038	rs2504008:33148347:G:C	-27843	58	81	0.426316	2.07138e-07	0.259345	0.0462298	0.000951466
ENSG00000273038	rs2504007:33150069:T:C	-26121	58	81	0.426316	2.07138e-07	0.259345	0.0462298	0.000951466
ENSG00000273038	rs2504006:33154886:A:G	-21304	58	81	0.426316	2.07138e-07	0.259345	0.0462298	0.000951466
ENSG00000273038	rs2504005:33155816:G:T	-20374	58	81	0.426316	2.07138e-07	0.259345	0.0462298	0.000951466
ENSG00000273038	rs2488299:33157106:T:G	-19084	58	81	0.426316	2.07138e-07	0.259345	0.0462298	0.000951466
ENSG00000273038	rs9702065:33159003:C:A	-17187	58	81	0.426316	2.08835e-07	0.259478	0.0462691	0.00095592
ENSG00000273038	rs141353785:33159763:C:T	-16427	58	81	0.426316	2.13908e-07	0.259155	0.0462574	0.000972886
ENSG00000273038	rs147000546:33159910:C:T	-16280	58	81	0.426316	2.13908e-07	0.259155	0.0462574	0.000972886
ENSG00000273038	rs146638545:33160755:CA:C	-15435	58	81	0.426316	2.16236e-07	0.25909	0.0462665	0.000980082
ENSG00000273038	rs2488306:33166783:C:T	-9407	58	81	0.426316	2.28436e-07	0.258751	0.0463113	0.00102397
ENSG00000273038	rs2488307:33167994:T:A	-8196	58	81	0.426316	2.33589e-07	0.258609	0.0463288	0.00104392
ENSG00000273038	rs1342544:33168689:A:G	-7501	60	84	0.442105	4.77444e-07	0.253308	0.0467802	0.00168413
ENSG00000273038	rs1935650:33171355:A:G	-4835	61	85	0.447368	5.09887e-07	0.25286	0.0468314	0.00177357
ENSG00000273038	rs2488310:33173313:A:G	-2877	55	74	0.389474	2.30968e-05	0.223425	0.0501195	0.0263788
ENSG00000273038	rs3003909:33174901:G:A	-1289	61	85	0.447368	5.33235e-07	0.252543	0.0468644	0.00183992
ENSG00000273038	rs34397571:33175321:C:CAAAG	-869	61	85	0.447368	5.39299e-07	0.252462	0.0468725	0.00185485
ENSG00000273038	rs12413584:33175619:G:C	-571	61	85	0.447368	5.39299e-07	0.252462	0.0468725	0.00185485
ENSG00000273038	rs2504014:33177950:C:G	1760	61	85	0.447368	5.58067e-07	0.252213	0.0468965	0.00190255
ENSG00000273038	rs1557150:33178307:T:C	2117	37	45	0.236842	1.5554e-06	-0.291645	0.0568148	0.00401812
ENSG00000273038	rs2488311:33178417:G:A	2227	59	82	0.431579	2.4936e-07	0.257759	0.0463026	0.00109422
ENSG00000273038	rs35319185:33178523:A:AAAG	2333	59	82	0.431579	2.81246e-07	0.257341	0.0464612	0.00119426
ENSG00000273038	rs67349103:33179044:GTT:G	2854	57	80	0.421053	2.06175e-07	0.258312	0.0460368	0.000949596
ENSG00000273038	rs10763901:33179180:A:C	2990	44	52	0.273684	1.90432e-06	-0.289557	0.056952	0.00468173
ENSG00000273038	rs2488312:33179729:C:T	3539	57	80	0.421053	2.08206e-07	0.258264	0.0460468	0.000954703
ENSG00000273038	rs4934608:33179849:G:A	3659	57	80	0.421053	2.08206e-07	0.258264	0.0460468	0.000954703
ENSG00000273038	rs2504015:33181945:T:C	5755	59	82	0.431579	2.98812e-07	0.256897	0.0464997	0.00124802
ENSG00000273038	rs7914799:33184658:A:T	8468	44	52	0.273684	1.94566e-06	-0.289407	0.0569808	0.00475665
ENSG00000273038	rs2488313:33185433:C:T	9243	59	82	0.431579	3.56286e-07	0.255535	0.0466	0.00137053
ENSG00000273038	rs11009132:33187619:A:G	11429	41	49	0.257895	2.19494e-05	-0.260625	0.0582911	0.0255147
ENSG00000273038	rs139213078:33189599:TA:T	13409	58	81	0.426316	1.98808e-07	0.259628	0.0462019	0.000922555
ENSG00000273038	rs2488317:33195070:T:C	18880	59	82	0.431579	4.34453e-07	0.253883	0.0466949	0.0015803
ENSG00000273038	rs2488319:33196703:T:C	20513	61	85	0.447368	8.45727e-07	0.248828	0.0471316	0.00255945
ENSG00000273038	rs2504020:33201128:C:G	24938	59	82	0.431579	4.4039e-07	0.253766	0.0467008	0.00159329
ENSG00000273038	rs2488321:33201257:G:A	25067	59	82	0.431579	4.4039e-07	0.253766	0.0467008	0.00159329
ENSG00000273038	rs2995463:33202639:G:A	26449	59	82	0.431579	4.4039e-07	0.253766	0.0467008	0.00159329
ENSG00000273038	rs2488325:33204951:C:T	28761	59	82	0.431579	4.4039e-07	0.253766	0.0467008	0.00159329
ENSG00000273038	rs9418040:33206835:C:T	30645	59	82	0.431579	4.4039e-07	0.253766	0.0467008	0.00159329
ENSG00000273038	rs2252752:33211440:T:C	35250	61	85	0.447368	8.71908e-07	0.248607	0.0471546	0.00262542
ENSG00000273038	rs2503998:33217418:G:C	41228	59	82	0.431579	4.50742e-07	0.253759	0.0467466	0.001617
ENSG00000273038	rs10763902	41886	41	49	0.257895	2.39647e-05	-0.259837	0.0584136	0.0270824
ENSG00000273038	rs143341662:33218132:T:TAAAA	41942	61	85	0.447368	9.19885e-07	0.248231	0.0471977	0.00273866
ENSG00000273038	rs34596235:33222097:C:CT	45907	61	85	0.447368	9.31884e-07	0.24817	0.0472138	0.00276644
ENSG00000273038	rs2245844:33224776:C:A	48586	59	82	0.431579	4.68578e-07	0.253534	0.0467838	0.00166074
ENSG00000273038	rs2457707:33227513:C:G	51323	59	82	0.431579	4.82471e-07	0.25335	0.0468091	0.00169768
ENSG00000273038	rs1187076:33246880:C:T	70690	51	67	0.352632	4.76316e-05	0.219961	0.0515496	0.0429045
ENSG00000273038	rs35016806:33247977:TC:T	71787	51	67	0.352632	4.69471e-05	0.220572	0.0516459	0.0425234
ENSG00000273038	rs35683757:33248008:TA:T	71818	51	67	0.352632	4.65014e-05	0.220332	0.051559	0.0422292
ENSG00000273038	rs148327254:33248948:GAAATT:G	72758	51	67	0.352632	4.75249e-05	0.220045	0.0515621	0.0428698
ENSG00000273038	rs2504003:33249354:C:T	73164	51	67	0.352632	4.75249e-05	0.220045	0.0515621	0.0428698
ENSG00000234420	rs143638595:43011429:CT:C	2470	23	25	0.131579	1.99311e-05	-0.160468	0.0356901	0.023917
ENSG00000243660	rs7920539:43880833:C:T	-51450	67	89	0.468421	3.12096e-06	-0.12701	0.0255882	0.00676632
ENSG00000243660	rs7905676:43881075:A:G	-51208	67	91	0.478947	7.61991e-06	-0.119618	0.0252271	0.0122069
ENSG00000243660	rs1126709:43881094:T:G	-51189	67	91	0.478947	7.53722e-06	-0.119652	0.0252196	0.0120982
ENSG00000243660	rs1126487:43883342:T:A	-48941	66	87	0.457895	2.07735e-06	-0.128105	0.0253017	0.00497362
ENSG00000243660	rs10793430:43883645:G:T	-48638	66	87	0.457895	2.07873e-06	-0.128031	0.0252878	0.00497623
ENSG00000243660	rs7918726:43893347:G:T	-38936	66	87	0.457895	2.02525e-06	-0.127846	0.0252197	0.00488
ENSG00000243660	rs10732897:43893544:T:C	-38739	66	87	0.457895	2.02525e-06	-0.127846	0.0252197	0.00488
ENSG00000243660	rs7070769	-37182	66	87	0.457895	2.01962e-06	-0.127835	0.0252143	0.00487021
ENSG00000243660	rs2256613:43899254:G:A	-33029	66	87	0.457895	2.02341e-06	-0.127819	0.0252132	0.00487694
ENSG00000243660	rs2256495:43899748:A:C	-32535	55	67	0.352632	4.8829e-05	-0.119414	0.0280293	0.0436554
ENSG00000243660	rs2066044:43916493:T:C	-15790	55	67	0.352632	5.92542e-05	0.117953	0.0280278	0.0497281
ENSG00000243660	rs2066043:43916918:T:C	-15365	55	67	0.352632	5.90899e-05	0.118024	0.0280397	0.0496367
ENSG00000243660	rs2248706:43917750:T:A	-14533	66	87	0.457895	2.03891e-06	0.128465	0.0253501	0.00490669
ENSG00000243660	rs68188650:43919225:AT:A	-13058	55	66	0.347368	5.84192e-05	0.118383	0.0281045	0.0492499
ENSG00000243660	rs2248469:43919678:T:C	-12605	55	66	0.347368	5.8198e-05	0.118557	0.0281389	0.0491095
ENSG00000243660	rs2819021:43920802:C:A	-11481	67	88	0.463158	2.21264e-06	0.128191	0.0253958	0.00522613
ENSG00000243660	rs2248335:43920941:G:A	-11342	55	66	0.347368	5.86355e-05	0.118929	0.0282408	0.0493969
ENSG00000243660	rs2248332:43921000:C:T	-11283	55	66	0.347368	5.92847e-05	0.11885	0.0282418	0.0497352
ENSG00000243660	rs2492411:43922585:A:G	-9698	54	65	0.342105	3.34867e-05	0.12199	0.0279762	0.034173
ENSG00000243660	rs2247981:43923616:A:T	-8667	51	62	0.326316	5.97247e-05	0.116971	0.0278085	0.0498585
ENSG00000243660	rs2247979	-8555	51	62	0.326316	5.89925e-05	0.116982	0.0277892	0.0495722
ENSG00000243660	rs2492410:43923883:T:C	-8400	54	65	0.342105	3.35879e-05	0.122057	0.0279966	0.0342403
ENSG00000243660	rs2492409:43923947:T:C	-8336	55	66	0.347368	5.95032e-05	0.118958	0.0282743	0.0498082
ENSG00000243660	rs7088430:43924463:T:C	-7820	51	62	0.326316	5.89925e-05	0.116982	0.0277892	0.0495722
ENSG00000243660	rs7070029:43924721:G:T	-7562	51	62	0.326316	5.89925e-05	0.116982	0.0277892	0.0495722
ENSG00000243660	rs2247860:43925253:A:C	-7030	54	65	0.342105	3.37274e-05	0.121992	0.0279887	0.0343458
ENSG00000243660	rs71016762:43925436:TC:T	-6847	54	65	0.342105	3.37274e-05	0.121992	0.0279887	0.0343458
ENSG00000243660	rs2492408:43927483:C:T	-4800	54	65	0.342105	3.37366e-05	0.121988	0.0279884	0.0343521
ENSG00000243660	rs2492407:43927859:A:G	-4424	51	62	0.326316	5.89925e-05	0.116982	0.0277892	0.0495722
ENSG00000243660	rs34182996:43928097:AT:A	-4186	54	65	0.342105	3.93326e-05	0.121397	0.0281146	0.0376963
ENSG00000243660	rs9422512:43928319:C:T	-3964	67	88	0.463158	2.43947e-06	0.127556	0.0253896	0.00566209
ENSG00000243660	rs2999286:43928539:A:C	-3744	51	62	0.326316	5.89925e-05	0.116982	0.0277892	0.0495722
ENSG00000243660	rs2999287:43928753:A:C	-3530	55	66	0.347368	5.95573e-05	0.118946	0.028273	0.0498246
ENSG00000243660	10:43929499:T:TATATAAATATAA	-2784	51	62	0.326316	4.64211e-05	0.119011	0.0278462	0.0421833
ENSG00000243660	rs56312642:43930243:T:TA	-2040	55	66	0.347368	5.95805e-05	0.118941	0.0282725	0.0498304
ENSG00000243660	rs4584528:43930578:C:T	-1705	54	65	0.342105	3.37597e-05	0.121979	0.0279875	0.034359
ENSG00000243660	rs61859002:43931002:G:A	-1281	51	62	0.326316	5.89925e-05	0.116982	0.0277892	0.0495722
ENSG00000243660	rs2492406:43931322:C:G	-961	54	65	0.342105	3.37007e-05	0.121978	0.0279842	0.0343319
ENSG00000243660	rs2492405:43931825:G:T	-458	54	65	0.342105	3.37735e-05	0.121974	0.027987	0.034359
ENSG00000243660	rs4559639:43934473:G:A	2190	54	65	0.342105	3.38061e-05	-0.121962	0.0279858	0.0343614
ENSG00000243660	rs4551711:43934539:T:A	2256	54	65	0.342105	3.38061e-05	-0.121962	0.0279858	0.0343614
ENSG00000243660	rs11238542:43934622:C:A	2339	67	88	0.463158	2.50107e-06	-0.12733	0.0253754	0.00577213
ENSG00000243660	rs7069214:43936706:C:T	4423	54	65	0.342105	3.38246e-05	0.121955	0.0279852	0.0343772
ENSG00000243660	rs2265887:43937117:G:C	4834	51	62	0.326316	5.89925e-05	0.116982	0.0277892	0.0495722
ENSG00000243660	rs2265886:43937787:T:C	5504	55	67	0.352632	5.97063e-05	0.116699	0.0277433	0.0498488
ENSG00000243660	rs2265953:43941216:T:G	8933	51	62	0.326316	5.89925e-05	0.116982	0.0277892	0.0495722
ENSG00000243660	rs2812797:43941948:G:A	9665	67	88	0.463158	2.55819e-06	0.127096	0.0253566	0.0058848
ENSG00000243660	rs2492403:43943161:C:T	10878	67	88	0.463158	2.57248e-06	0.127042	0.0253527	0.00591138
ENSG00000243660	rs2261665:43943476:C:T	11193	67	89	0.468421	2.59145e-06	0.127039	0.0253613	0.00594059
ENSG00000243660	rs2261636:43943793:A:G	11510	51	62	0.326316	5.89925e-05	0.116982	0.0277892	0.0495722
ENSG00000243660	rs2493648:43943819:G:A	11536	53	64	0.336842	3.39414e-05	0.121912	0.0279811	0.0344567
ENSG00000243660	rs2819026:43944134:G:A	11851	52	62	0.326316	4.06676e-05	0.122809	0.0285	0.0385867
ENSG00000243660	rs2260200:43944815:T:C	12532	53	64	0.336842	3.39414e-05	0.121912	0.0279811	0.0344567
ENSG00000243660	rs2260162:43945262:G:A	12979	67	89	0.468421	2.60205e-06	0.126931	0.0253447	0.0059565
ENSG00000243660	rs2259045:43946295:G:A	14012	67	89	0.468421	2.60205e-06	0.126931	0.0253447	0.0059565
ENSG00000243660	rs2265954:43946636:C:T	14353	53	64	0.336842	3.39992e-05	0.12189	0.0279791	0.0344951
ENSG00000243660	rs57384908:43947974:AT:A	15691	53	64	0.336842	3.39541e-05	0.121917	0.0279828	0.0344668
ENSG00000243660	rs35328197:43949226:TCA:T	16943	53	64	0.336842	3.40305e-05	0.121879	0.027978	0.0345187
ENSG00000243660	rs2250444:43951389:T:C	19106	51	62	0.326316	5.89925e-05	0.116982	0.0277892	0.0495722
ENSG00000243660	rs7089290:43955319:A:G	23036	53	64	0.336842	3.41717e-05	-0.121827	0.0279732	0.0346077
ENSG00000243660	rs4948726:43955574:C:T	23291	51	62	0.326316	5.89925e-05	-0.116982	0.0277892	0.0495722
ENSG00000243660	rs7081729:43958222:T:A	25939	67	90	0.473684	2.76182e-06	0.126367	0.0253058	0.00621605
ENSG00000243660	rs3006363:43959021:C:T	26738	53	64	0.336842	3.42519e-05	0.121798	0.0279704	0.0346492
ENSG00000243660	rs6421744:43959790:C:T	27507	53	64	0.336842	3.41083e-05	0.121892	0.0279848	0.0345566
ENSG00000243660	rs140713998:43960498:A:AC	28215	54	64	0.336842	1.74848e-05	0.128447	0.0283546	0.0218045
ENSG00000243660	rs150810963:43960535:G:A	28252	67	90	0.473684	2.60798e-06	0.126643	0.02529	0.00596688
ENSG00000243660	rs2393954:43967802:T:A	35519	67	90	0.473684	2.99615e-06	0.12574	0.0252815	0.00660213
ENSG00000243660	rs9422371:43968915:T:C	36632	53	64	0.336842	3.45843e-05	0.121678	0.0279593	0.0348446
ENSG00000243660	rs7914140:43973025:A:G	40742	53	64	0.336842	3.46941e-05	0.121639	0.0279556	0.0349181
ENSG00000243660	rs3750890:43978087:A:G	45804	67	90	0.473684	3.04828e-06	0.125406	0.0252357	0.00667276
ENSG00000243660	rs3006408:43981731:G:A	49448	67	90	0.473684	3.11035e-06	0.125209	0.0252213	0.0067536
ENSG00000243660	rs3124205:43986427:T:C	54144	67	89	0.468421	3.15655e-06	0.126373	0.0254742	0.0068171
ENSG00000243660	rs7910878:43986535:C:A	54252	67	90	0.473684	2.86539e-06	0.124995	0.0250763	0.00638356
ENSG00000243660	rs3006409:43990108:A:T	57825	67	90	0.473684	3.95826e-06	0.12285	0.0250457	0.00800128
ENSG00000243660	rs2999223:43996504:C:T	64221	67	90	0.473684	3.9784e-06	0.1228	0.0250419	0.00803208
ENSG00000150165	rs17769532:47684765:T:C	526781	43	49	0.257895	9.15403e-06	-0.809371	0.172377	0.0137899
ENSG00000150165	rs12412804:47685492:A:G	527508	45	51	0.268421	3.94482e-05	-0.752853	0.174386	0.0377822
ENSG00000186807	rs4013507:48303741:G:A	556804	33	37	0.194737	2.56218e-05	0.181256	0.0409083	0.0283362
ENSG00000186807	rs199500043:48307363:GA:G	560426	33	37	0.194737	2.49754e-05	0.181145	0.040822	0.0278548
ENSG00000186807	rs117579758:48311583:A:T	564646	33	37	0.194737	2.48418e-05	0.180755	0.0407212	0.0277475
ENSG00000186807	rs57740066:48313059:T:C	566122	36	41	0.215789	9.4811e-06	0.184527	0.0393743	0.0141017
ENSG00000186807	rs4342964:48318619:C:T	571682	33	37	0.194737	2.1521e-05	0.180621	0.0403512	0.0251836
ENSG00000099290	rs4042937	-30410	63	82	0.431579	3.81427e-05	0.113958	0.0263421	0.0371149
ENSG00000099290	rs7919882:51798336:T:C	-29313	63	81	0.426316	2.01968e-05	0.120749	0.0268766	0.0241464
ENSG00000099290	rs4576765:51801913:G:A	-25736	63	82	0.431579	4.04932e-05	0.114579	0.026583	0.0384567
ENSG00000099290	rs2338049:51801925:A:G	-25724	63	81	0.426316	2.17302e-05	0.120636	0.0269655	0.0253359
ENSG00000099290	rs2813299:52017680:G:A	190031	39	42	0.221053	5.39523e-05	-0.14597	0.0344786	0.0467049
ENSG00000099290	rs2842126:52018482:A:G	190833	39	42	0.221053	4.71677e-05	-0.147697	0.0345927	0.0426542
ENSG00000099290	rs2813297:52018599:G:A	190950	39	42	0.221053	4.71677e-05	-0.147697	0.0345927	0.0426542
ENSG00000204147	rs72634647:52536772:T:C	37693	27	29	0.152632	3.1924e-05	0.158365	0.0362135	0.0330451
ENSG00000204147	rs10821826:52550158:A:G	51079	27	32	0.168421	3.73999e-05	0.137266	0.0316916	0.0367823
ENSG00000204147	rs147588330:52552222:TTA:T	53143	25	27	0.142105	5.22905e-06	0.175984	0.0363909	0.00963899
ENSG00000204147	rs10740041:52552420:C:T	53341	26	28	0.147368	4.07762e-06	0.174547	0.0356387	0.00818356
ENSG00000204147	rs7084132:52559843:T:G	60764	26	28	0.147368	4.1482e-06	0.173589	0.035474	0.00824578
ENSG00000204147	rs6479731:52560557:G:A	61478	26	28	0.147368	4.1482e-06	0.173589	0.035474	0.00824578
ENSG00000204147	rs7072584:52561829:C:A	62750	26	28	0.147368	4.1482e-06	0.173589	0.035474	0.00824578
ENSG00000204147	rs4619096:52564421:G:A	65342	26	29	0.152632	1.08847e-05	0.158771	0.0341337	0.0156031
ENSG00000204147	rs4078160:52565940:A:C	66861	26	29	0.152632	1.08847e-05	0.158771	0.0341337	0.0156031
ENSG00000204147	rs10740043:52567865:A:G	68786	26	28	0.147368	4.12487e-06	0.173579	0.0354617	0.00820992
ENSG00000204147	rs4256922:52568616:T:C	69537	26	28	0.147368	4.12487e-06	0.173579	0.0354617	0.00820992
ENSG00000204147	rs4245008	76989	25	27	0.142105	2.69309e-06	0.178	0.0356017	0.00610965
ENSG00000182010	rs7903566	373025	39	41	0.215789	3.50204e-05	-0.355686	0.0817917	0.0351751
ENSG00000182010	rs10761645:64320150:C:G	377355	39	41	0.215789	4.12533e-05	-0.352747	0.0819336	0.0389574
ENSG00000138311	rs7086545:64086524:G:A	-47428	49	60	0.315789	2.41762e-05	0.294021	0.0661325	0.0272474
ENSG00000138311	rs12249008:64092543:T:C	-41409	48	59	0.310526	3.03451e-05	0.290282	0.0661773	0.031839
ENSG00000138311	rs12243017:64092855:G:T	-41097	48	59	0.310526	3.01074e-05	0.290535	0.0662037	0.0316713
ENSG00000138311	rs11363057:64097657:AT:A	-36295	50	65	0.342105	4.99573e-05	0.26532	0.0623661	0.0443668
ENSG00000138311	rs3864811:64098876:T:C	-35076	49	60	0.315789	2.39371e-05	0.294121	0.0661164	0.0270727
ENSG00000138311	rs1907709:64099137:C:T	-34815	48	59	0.310526	3.03282e-05	0.290265	0.0661711	0.0318251
ENSG00000138311	rs7068108:64100181:A:C	-33771	49	60	0.315789	2.39864e-05	0.294109	0.0661218	0.027094
ENSG00000138311	rs7068786:64100417:G:A	-33535	50	65	0.342105	5.43441e-05	0.264815	0.0625792	0.0468939
ENSG00000138311	rs7087028:64103869:C:T	-30083	48	59	0.310526	3.03282e-05	0.290265	0.0661711	0.0318251
ENSG00000138311	rs7092664:64105321:G:A	-28631	49	60	0.315789	2.39864e-05	0.294109	0.0661218	0.027094
ENSG00000138311	rs7096508:64111777:C:A	-22175	49	60	0.315789	2.36967e-05	0.294191	0.0660931	0.026877
ENSG00000138311	rs10437344:64112690:G:A	-21262	49	60	0.315789	2.3648e-05	0.294203	0.0660877	0.0268315
ENSG00000138311	rs2087626:64118375:A:G	-15577	48	59	0.310526	2.96987e-05	0.290042	0.0660372	0.0313989
ENSG00000138311	rs10995132:64128133:G:A	-5819	48	59	0.310526	2.05399e-05	0.293283	0.0653433	0.0244514
ENSG00000138311	rs7080900	-5039	48	59	0.310526	2.17318e-05	0.292162	0.0653067	0.0253359
ENSG00000138311	rs56880293:64129516:T:A	-4436	47	58	0.305263	2.65959e-05	0.289415	0.0654633	0.0290887
ENSG00000138311	rs12263323:64131176:A:T	-2776	47	58	0.305263	2.42954e-05	0.290406	0.0653382	0.0273415
ENSG00000138311	rs3758489:64132130:G:A	-1822	48	59	0.310526	1.58727e-05	0.297444	0.0653015	0.0203682
ENSG00000138311	rs3063794:64135640:TC:T	1688	48	59	0.310526	9.76764e-06	0.304624	0.0651054	0.0144524
ENSG00000138311	rs149800343:64136710:CAG:C	2758	47	59	0.310526	1.58691e-05	0.290496	0.0637752	0.0203655
ENSG00000138311	rs4523583:64138827:G:A	4875	48	60	0.315789	1.25157e-05	0.29409	0.063713	0.0173361
ENSG00000138311	rs6479809:64138957:A:G	5005	55	73	0.384211	1.43126e-06	0.302348	0.0586704	0.00379053
ENSG00000138311	rs10761627:64140525:T:C	6573	55	73	0.384211	1.31633e-06	0.30271	0.0585117	0.00353806
ENSG00000138311	rs7091588:64140642:G:T	6690	55	73	0.384211	1.31218e-06	0.302683	0.058498	0.0035294
ENSG00000138311	rs3781214:64141963:T:G	8011	48	60	0.315789	1.25157e-05	0.29409	0.063713	0.0173361
ENSG00000138311	rs7075904:64144182:C:G	10230	48	60	0.315789	1.25157e-05	0.29409	0.063713	0.0173361
ENSG00000138311	rs10733773:64145086:G:A	11134	55	71	0.373684	8.99697e-07	0.313567	0.0595605	0.00268755
ENSG00000138311	rs10761628	11591	55	71	0.373684	8.83681e-07	0.313732	0.0595434	0.0026492
ENSG00000138311	rs10821987:64145637:C:T	11685	55	71	0.373684	8.92675e-07	0.313738	0.0595718	0.00267195
ENSG00000138311	rs4104477:64146649:G:A	12697	55	71	0.373684	8.83681e-07	0.313732	0.0595434	0.0026492
ENSG00000138311	rs2893898:64150773:C:T	16821	49	61	0.321053	5.08427e-06	0.306652	0.0633197	0.00944763
ENSG00000138311	rs4543879:64150794:C:T	16842	55	71	0.373684	8.72636e-07	0.3139	0.0595414	0.00262738
ENSG00000204130	rs6480327:70077462:C:T	-23403	22	26	0.136842	1.9525e-05	0.0604288	0.0134242	0.0235959
ENSG00000204130	rs75032908:70082891:A:G	-17974	21	25	0.131579	1.43488e-05	0.0622496	0.013589	0.0191749
ENSG00000204130	rs10998068:70083147:C:T	-17718	21	25	0.131579	1.41306e-05	0.0623031	0.0135891	0.0189552
ENSG00000204130	rs1867568:70088625:C:T	-12240	22	26	0.136842	2.00017e-05	0.0605964	0.0134802	0.0239643
ENSG00000204130	rs16925325:70090263:T:G	-10602	21	25	0.131579	1.52382e-05	0.0625639	0.0137038	0.0198321
ENSG00000204130	rs10998073:70093537:C:G	-7328	18	22	0.115789	2.73767e-05	0.0619355	0.0140334	0.0296372
ENSG00000204130	rs10998074:70093561:C:A	-7304	18	22	0.115789	2.803e-05	0.061649	0.013988	0.0301369
ENSG00000204130	rs57142548:70093832:A:AAAC	-7033	20	24	0.126316	2.51517e-05	0.0610117	0.013755	0.0279926
ENSG00000204130	rs12217908:70093965:A:G	-6900	18	22	0.115789	2.86871e-05	0.0617135	0.014022	0.0306768
ENSG00000204130	rs34133419:70094867:CT:C	-5998	20	24	0.126316	2.78545e-05	0.0605937	0.0137435	0.0299863
ENSG00000204130	rs72408822:70094992:CTT:C	-5873	20	24	0.126316	3.16914e-05	0.0602797	0.0137782	0.032861
ENSG00000204130	rs5785860:70095924:C:CT	-4941	20	24	0.126316	3.06418e-05	0.060277	0.0137497	0.0320617
ENSG00000204130	rs79502423:70098039:T:TA	-2826	18	22	0.115789	3.74198e-05	0.0606707	0.014008	0.0367937
ENSG00000204130	rs76636639:70099433:A:G	-1432	18	22	0.115789	3.7937e-05	0.060619	0.0140078	0.0369827
ENSG00000204130	rs7071140:70100250:A:G	-615	20	24	0.126316	3.34105e-05	0.0599781	0.013753	0.0341179
ENSG00000204130	rs3199937:70102749:C:A	1884	18	22	0.115789	3.87642e-05	0.0605374	0.0140075	0.0374102
ENSG00000204130	rs17297439:70103461:G:A	2596	18	22	0.115789	3.93133e-05	0.0604834	0.014007	0.0376902
ENSG00000204130	rs3831018:70103633:AACTT:A	2768	18	22	0.115789	3.93133e-05	0.0604834	0.014007	0.0376902
ENSG00000204130	rs2281697:70103958:A:G	3093	18	22	0.115789	3.93133e-05	0.0604834	0.014007	0.0376902
ENSG00000204130	rs2281698:70104320:T:C	3455	20	24	0.126316	3.39688e-05	0.0599154	0.0137524	0.0344755
ENSG00000204130	rs7922852:70106165:C:T	5300	20	24	0.126316	3.44605e-05	0.0598606	0.0137518	0.0347619
ENSG00000204130	rs7923937:70106791:G:A	5926	20	24	0.126316	3.44605e-05	0.0598606	0.0137518	0.0347619
ENSG00000204130	rs61857312:70106892:A:G	6027	20	24	0.126316	3.18541e-05	0.0614247	0.0140442	0.0329907
ENSG00000204130	rs10998077:70107836:A:G	6971	20	24	0.126316	3.44605e-05	0.0598606	0.0137518	0.0347619
ENSG00000204130	rs76282461:70109179:AG:A	8314	20	24	0.126316	3.34273e-05	0.0601139	0.0137846	0.0341318
ENSG00000204130	rs117847358:70109286:T:G	8421	20	24	0.126316	2.91981e-05	0.0628346	0.0142918	0.0310647
ENSG00000204130	rs61857314:70109441:A:G	8576	20	24	0.126316	3.44605e-05	0.0598606	0.0137518	0.0347619
ENSG00000204130	rs200638644:70110476:G:GT	9611	18	22	0.115789	3.01381e-05	0.0613113	0.0139718	0.0316918
ENSG00000204130	rs61857315:70111600:G:A	10735	18	22	0.115789	3.98756e-05	0.0604284	0.0140065	0.0380614
ENSG00000204130	rs10998079:70113591:T:A	12726	18	22	0.115789	3.98756e-05	0.0604284	0.0140065	0.0380614
ENSG00000204130	rs34115289:70119332:C:CTA	18467	20	24	0.126316	3.44605e-05	0.0598606	0.0137518	0.0347619
ENSG00000204130	rs10823181:70119360:C:T	18495	20	24	0.126316	3.44605e-05	0.0598606	0.0137518	0.0347619
ENSG00000204130	rs7086831:70121041:A:G	20176	18	22	0.115789	3.98756e-05	0.0604284	0.0140065	0.0380614
ENSG00000204130	rs12217933:70124249:A:T	23384	18	22	0.115789	3.98756e-05	0.0604284	0.0140065	0.0380614
ENSG00000204130	rs7068326:70124689:C:A	23824	20	24	0.126316	3.44605e-05	0.0598606	0.0137518	0.0347619
ENSG00000204130	rs12218269:70125311:A:G	24446	18	22	0.115789	3.98756e-05	0.0604284	0.0140065	0.0380614
ENSG00000204130	rs145762001:70126345:C:CA	25480	20	24	0.126316	3.44605e-05	0.0598606	0.0137518	0.0347619
ENSG00000204130	rs61857319:70127497:C:G	26632	18	22	0.115789	3.98756e-05	0.0604284	0.0140065	0.0380614
ENSG00000204130	rs61857320:70127753:C:T	26888	20	24	0.126316	3.44605e-05	0.0598606	0.0137518	0.0347619
ENSG00000204130	rs77758431:70128433:G:A	27568	20	24	0.126316	3.44605e-05	0.0598606	0.0137518	0.0347619
ENSG00000204130	rs10998088:70128865:A:T	28000	18	22	0.115789	3.98756e-05	0.0604284	0.0140065	0.0380614
ENSG00000204130	rs3927445:70129763:G:A	28898	20	24	0.126316	3.44605e-05	0.0598606	0.0137518	0.0347619
ENSG00000204130	rs7071491:70130338:G:A	29473	20	24	0.126316	3.44605e-05	0.0598606	0.0137518	0.0347619
ENSG00000204130	rs10998091:70130844:G:A	29979	18	22	0.115789	3.98756e-05	0.0604284	0.0140065	0.0380614
ENSG00000204130	rs61857321:70131446:G:A	30581	20	24	0.126316	2.78054e-05	0.060584	0.0137398	0.0299511
ENSG00000204130	rs10998093:70132872:C:G	32007	20	24	0.126316	3.44605e-05	0.0598606	0.0137518	0.0347619
ENSG00000204130	rs7086030:70133574:C:T	32709	20	24	0.126316	3.44605e-05	0.0598606	0.0137518	0.0347619
ENSG00000204130	rs7086181:70133656:C:G	32791	20	24	0.126316	3.44605e-05	0.0598606	0.0137518	0.0347619
ENSG00000204130	rs10998098:70137781:G:A	36916	20	24	0.126316	3.42709e-05	0.0598915	0.0137543	0.0346492
ENSG00000204130	rs76198388:70138935:GAAACTGCT:G	38070	20	24	0.126316	3.42709e-05	0.0598915	0.0137543	0.0346492
ENSG00000204130	rs10998099:70139604:G:A	38739	18	22	0.115789	3.93054e-05	0.0605213	0.0140157	0.0376902
ENSG00000204130	rs10823185:70139633:C:T	38768	18	22	0.115789	3.95567e-05	0.0604961	0.0140153	0.0378606
ENSG00000204130	rs10998101:70139702:A:C	38837	20	24	0.126316	3.40079e-05	0.0599554	0.0137625	0.0345019
ENSG00000204130	rs10509301:70144677:T:C	43812	18	22	0.115789	3.98756e-05	0.0604284	0.0140065	0.0380614
ENSG00000204130	10:70147501:C:CCCATAATCCCAGCACTTTGGGAGG	46636	20	24	0.126316	4.04935e-05	0.0603036	0.0139908	0.0384567
ENSG00000204130	rs10823189:70147533:G:C	46668	18	22	0.115789	4.23511e-05	0.0607169	0.0141258	0.0395969
ENSG00000204130	10:70148604:AAAAAAAAG:A	47739	18	22	0.115789	3.95948e-05	0.0604688	0.0140098	0.0378854
ENSG00000204130	rs10998106:70150362:G:A	49497	20	24	0.126316	3.42819e-05	0.0599485	0.0137676	0.0346492
ENSG00000204130	rs61855074:70150936:A:G	50071	20	24	0.126316	3.42819e-05	0.0599485	0.0137676	0.0346492
ENSG00000204130	rs61855075:70150991:A:C	50126	20	24	0.126316	3.42819e-05	0.0599485	0.0137676	0.0346492
ENSG00000204130	rs76556145:70151186:A:G	50321	20	24	0.126316	3.42819e-05	0.0599485	0.0137676	0.0346492
ENSG00000204130	rs7078365:70154576:C:T	53711	20	24	0.126316	3.40512e-05	0.059986	0.0137706	0.0345279
ENSG00000204130	rs7078731:70154678:G:T	53813	20	24	0.126316	3.40512e-05	0.059986	0.0137706	0.0345279
ENSG00000204130	rs10998111:70155858:T:C	54993	20	24	0.126316	3.40512e-05	0.059986	0.0137706	0.0345279
ENSG00000204130	rs200642112:70157359:A:AAAAATT	56494	20	24	0.126316	3.2332e-05	0.0606786	0.0138861	0.0333351
ENSG00000204130	rs61855078:70157681:C:T	56816	20	24	0.126316	3.40512e-05	0.059986	0.0137706	0.0345279
ENSG00000204130	rs190154969:70160719:G:A	59854	18	22	0.115789	3.93174e-05	0.06057	0.0140272	0.0376928
ENSG00000204130	rs201649166:70162968:G:GA	62103	19	23	0.121053	4.22979e-05	0.0609484	0.0141786	0.039571
ENSG00000204130	rs34992611:70163550:CTT:C	62685	20	24	0.126316	3.47771e-05	0.059966	0.0137837	0.0349903
ENSG00000204130	rs61855081:70166081:C:T	65216	19	23	0.121053	8.27937e-06	0.0646914	0.0137037	0.0129597
ENSG00000204130	rs61855082:70166150:C:G	65285	20	24	0.126316	3.38441e-05	0.0600787	0.0137868	0.0343909
ENSG00000204130	rs80199870:70167479:T:G	66614	18	22	0.115789	3.93215e-05	0.0606305	0.0140413	0.0376941
ENSG00000204130	rs61855083:70169739:C:T	68874	18	22	0.115789	3.90549e-05	0.0606693	0.0140444	0.0375719
ENSG00000204130	rs78324221:70170333:T:A	69468	20	24	0.126316	3.3623e-05	0.060115	0.0137897	0.0342671
ENSG00000204130	rs74939147:70173298:G:GT	72433	20	24	0.126316	3.36494e-05	0.0601695	0.0138028	0.0342899
ENSG00000204130	rs17460571:70174885:A:G	74020	18	22	0.115789	3.88072e-05	0.0607667	0.0140615	0.0374411
ENSG00000204130	rs10998140:70175272:G:A	74407	20	24	0.126316	3.32504e-05	0.060236	0.0138081	0.0339867
ENSG00000204130	rs10998141:70175323:A:G	74458	20	24	0.126316	3.32504e-05	0.060236	0.0138081	0.0339867
ENSG00000204130	rs61855088:70175992:C:T	75127	18	22	0.115789	3.88072e-05	0.0607667	0.0140615	0.0374411
ENSG00000204130	rs61855089:70176091:A:C	75226	20	24	0.126316	3.32504e-05	0.060236	0.0138081	0.0339867
ENSG00000204130	rs11814378:70183745:C:T	82880	18	22	0.115789	3.85953e-05	0.0609125	0.0140905	0.0372983
ENSG00000204130	rs7923283:70185161:T:C	84296	18	22	0.115789	3.79647e-05	0.0611285	0.0141262	0.0370008
ENSG00000204130	rs7907028:70185222:G:A	84357	18	22	0.115789	3.79647e-05	0.0611285	0.0141262	0.0370008
ENSG00000204130	rs7096507:70187956:C:A	87091	18	22	0.115789	3.69625e-05	0.061524	0.0141943	0.0364905
ENSG00000204130	rs79531858:70189743:G:A	88878	18	22	0.115789	3.68585e-05	0.0616008	0.0142096	0.0364228
ENSG00000204130	rs12221039:70190155:A:G	89290	18	22	0.115789	3.66717e-05	0.0616291	0.0142117	0.0363159
ENSG00000204130	rs59959262:70191014:G:GA	90149	19	23	0.121053	2.89021e-05	0.0619683	0.0140862	0.0308247
ENSG00000204130	rs76815166:70192889:C:T	92024	18	22	0.115789	3.67685e-05	0.0616755	0.0142247	0.036377
ENSG00000204130	rs80235581:70193317:T:C	92452	18	22	0.115789	3.67685e-05	0.0616755	0.0142247	0.036377
ENSG00000204130	rs74756584:70193318:G:A	92453	18	22	0.115789	3.67685e-05	0.0616755	0.0142247	0.036377
ENSG00000204130	rs200522204:70195209:TAC:T	94344	18	22	0.115789	3.6871e-05	0.0617209	0.0142376	0.036432
ENSG00000204130	rs61855092:70196358:T:C	95493	18	22	0.115789	3.66923e-05	0.0617479	0.0142396	0.0363338
ENSG00000204130	rs10998166:70197563:G:C	96698	18	22	0.115789	3.65173e-05	0.0617744	0.0142416	0.0362208
ENSG00000204130	rs61855132:70206993:G:A	106128	17	21	0.110526	3.26589e-05	0.0645473	0.0147804	0.0335789
ENSG00000204130	rs78353373:70207318:C:T	106453	17	21	0.110526	3.66133e-05	0.0626305	0.0144413	0.0362856
ENSG00000204130	rs59391479:70209582:ATCGCTTGAACCCGAGAG:A	108717	17	21	0.110526	3.83563e-05	0.062667	0.0144908	0.0372068
ENSG00000204130	rs10458637:70210331:T:C	109466	17	21	0.110526	3.91864e-05	0.0626549	0.0145071	0.0376517
ENSG00000204130	rs10458651:70210332:G:A	109467	17	21	0.110526	3.91864e-05	0.0626549	0.0145071	0.0376517
ENSG00000204130	rs10998177:70211037:A:G	110172	17	21	0.110526	3.95626e-05	0.062659	0.0145165	0.0378652
ENSG00000225383	rs998789:10818087:A:G	-8314	43	50	0.263158	2.70435e-05	0.221909	0.0502437	0.0293695
ENSG00000225383	rs11256834	8364	31	38	0.2	6.27911e-07	0.257205	0.0480742	0.00207223
ENSG00000225383	rs11256835:10834903:C:T	8502	31	38	0.2	5.66164e-07	0.258808	0.0481535	0.00192191
ENSG00000225383	rs11256836:10835220:T:C	8819	34	41	0.215789	6.28822e-07	0.255231	0.0477082	0.00207323
ENSG00000225383	rs11592096:10836084:C:T	9683	31	38	0.2	5.9115e-07	0.258658	0.0482171	0.00198145
ENSG00000225383	rs2296018:10836314:G:C	9913	31	38	0.2	5.94102e-07	0.258636	0.0482236	0.0019852
ENSG00000225383	rs3215732:10836550:GT:G	10149	31	38	0.2	7.78255e-07	0.257006	0.0484988	0.00241601
ENSG00000225383	rs2296019:10836706:A:G	10305	35	42	0.221053	1.34948e-06	0.24884	0.0481548	0.00361413
ENSG00000225383	rs59155188:10837720:A:AAAAG	11319	34	41	0.215789	6.65807e-07	0.255268	0.0478363	0.0021465
ENSG00000065328	rs74120710:12937634:C:T	-265921	15	17	0.0894737	2.74144e-05	-0.237499	0.0538171	0.0296626
ENSG00000065328	rs74120711:12937666:A:C	-265889	15	17	0.0894737	2.69318e-05	-0.237664	0.0537978	0.0292677
ENSG00000065328	rs74120712:12937708:C:T	-265847	15	17	0.0894737	2.69969e-05	-0.237782	0.0538322	0.0293255
ENSG00000065328	rs7096623:12943483:C:T	-260072	13	15	0.0789474	1.49736e-05	-0.251468	0.0550266	0.0195855
ENSG00000065328	rs74120713:12944903:A:G	-258652	12	14	0.0736842	9.06963e-06	-0.262911	0.0559657	0.0136971
ENSG00000065328	rs11258054:12945591:C:A	-257964	12	14	0.0736842	8.79599e-06	-0.263092	0.0559122	0.0134077
ENSG00000065328	rs12259118:12946435:C:T	-257120	14	16	0.0842105	8.11599e-06	-0.253022	0.053541	0.0127945
ENSG00000065328	rs59486331:12947351:C:A	-256204	14	16	0.0842105	8.12256e-06	-0.252726	0.0534806	0.012801
ENSG00000065328	rs1929382:12947858:C:T	-255697	14	16	0.0842105	8.25151e-06	-0.252347	0.0534453	0.0129367
ENSG00000065328	rs1929381:12947903:C:A	-255652	14	16	0.0842105	8.25151e-06	-0.252347	0.0534453	0.0129367
ENSG00000065328	rs2225465:12948067:C:G	-255488	14	16	0.0842105	8.18626e-06	-0.252394	0.0534327	0.0128656
ENSG00000065328	rs12268570:12949367:G:A	-254188	14	16	0.0842105	8.27407e-06	-0.252001	0.0533798	0.0129596
ENSG00000065328	rs12268676:12949508:G:A	-254047	14	16	0.0842105	8.27407e-06	-0.252001	0.0533798	0.0129596
ENSG00000065328	rs7908635	-253504	15	17	0.0894737	6.18015e-07	-0.273098	0.0510089	0.00204867
ENSG00000065328	rs12243442:12951727:G:A	-251828	16	18	0.0947368	5.78338e-05	-0.222122	0.0526984	0.0488843
ENSG00000065328	rs10906250:12952406:C:A	-251149	16	18	0.0947368	5.87828e-05	-0.222063	0.0527392	0.0494779
ENSG00000065328	rs7909672:12953643:C:T	-249912	14	16	0.0842105	8.65103e-06	-0.252303	0.0535714	0.0132542
ENSG00000065328	rs56029744:12954662:G:T	-248893	12	14	0.0736842	9.52021e-06	-0.262522	0.0560293	0.0141451
ENSG00000065328	rs7902554:12954895:T:G	-248660	12	14	0.0736842	1.00405e-05	-0.262025	0.0560848	0.0147745
ENSG00000065328	rs57642391:12955215:G:A	-248340	12	14	0.0736842	1.02398e-05	-0.261783	0.0560928	0.0149894
ENSG00000065328	rs11528649:12955811:C:A	-247744	12	14	0.0736842	1.12557e-05	-0.264415	0.0569502	0.0160061
ENSG00000065328	rs11528650:12956756:C:T	-246799	12	14	0.0736842	1.98464e-05	-0.264196	0.0587462	0.0238872
ENSG00000107537	rs12411977:13320555:T:C	758	50	63	0.331579	5.74949e-05	-0.104467	0.0247755	0.0486725
ENSG00000107625	rs58433451:70975053:T:C	314018	52	65	0.342105	8.07348e-06	0.0433341	0.00916719	0.0127613
ENSG00000107625	rs59073566:70975071:A:AT	314036	52	65	0.342105	7.69144e-06	0.0434513	0.00916828	0.0122979
ENSG00000107625	rs5030933	314204	54	67	0.352632	1.06249e-05	0.0430533	0.00924371	0.0153629
ENSG00000107625	rs5030935:70975381:C:T	314346	55	68	0.357895	6.06384e-06	0.0444027	0.00925256	0.0105209
ENSG00000107625	rs7914256:70977559:C:T	316524	52	65	0.342105	2.53909e-06	0.0456606	0.00910632	0.00584645
ENSG00000198954	rs10998461	-131971	72	92	0.484211	4.62024e-05	-0.0594173	0.0138984	0.0420584
ENSG00000198954	rs1007042:70616973:T:G	-131515	71	91	0.478947	3.71281e-05	-0.0597017	0.0137777	0.0365845
ENSG00000198954	rs10823267:70663792:C:T	-84696	66	89	0.468421	2.5741e-06	-0.0622319	0.0124195	0.00591431
ENSG00000198954	rs7918860:70670696:A:G	-77792	67	90	0.473684	2.34714e-06	-0.0624908	0.0124153	0.00548355
ENSG00000198954	rs2429024:70740573:A:C	-7915	67	91	0.478947	1.92391e-06	-0.0628053	0.012359	0.00471398
ENSG00000198954	rs2487701:70746267:G:A	-2221	65	89	0.468421	1.99737e-06	-0.0614915	0.0121222	0.00483944
ENSG00000198954	rs2255607:70748784:G:A	296	68	93	0.489474	3.46252e-07	-0.0660159	0.0120242	0.00134023
ENSG00000198954	rs17471869	1381	68	93	0.489474	3.67701e-07	-0.0657875	0.0120133	0.00140444
ENSG00000198954	rs2487702:70750148:C:G	1660	68	93	0.489474	3.75492e-07	-0.0657431	0.012016	0.00142753
ENSG00000198954	rs2429030:70751673:T:C	3185	68	93	0.489474	3.70801e-07	-0.0657806	0.0120164	0.00141348
ENSG00000198954	rs2491023:70754071:G:A	5583	65	89	0.468421	2.35736e-06	-0.0608481	0.0120915	0.00550646
ENSG00000198954	rs2429031:70755877:G:A	7389	65	89	0.468421	2.30554e-06	-0.0609348	0.0120957	0.00540126
ENSG00000198954	rs200965479:70756624:AT:A	8136	65	89	0.468421	1.87356e-06	-0.0616489	0.0121161	0.00462372
ENSG00000198954	rs77379383:70759169:T:A	10681	65	90	0.473684	5.12584e-06	-0.0584318	0.0120705	0.00950091
ENSG00000198954	rs58476490:70763710:C:T	15222	65	89	0.468421	2.26471e-06	-0.0610072	0.0120996	0.00532959
ENSG00000198954	rs2487706:70764444:A:G	15956	68	93	0.489474	3.59602e-07	-0.0659234	0.0120267	0.00138064
ENSG00000198954	rs2487707:70765092:G:T	16604	68	93	0.489474	3.59602e-07	-0.0659234	0.0120267	0.00138064
ENSG00000198954	rs2487708:70767402:A:G	18914	68	93	0.489474	3.67363e-07	-0.0658768	0.0120292	0.0014035
ENSG00000198954	rs199584187:70771148:A:C	22660	68	93	0.489474	3.47174e-07	-0.0661958	0.0120583	0.00134288
ENSG00000198954	rs6864:70776594:A:C	28106	68	93	0.489474	2.67963e-07	-0.0673913	0.0121423	0.00115436
ENSG00000198954	rs2491019:70776987:G:A	28499	67	90	0.473684	6.06885e-08	-0.0716277	0.012158	0.000421321
ENSG00000198954	rs79227279:70780562:TGGGAGGCGAAGGTTGCA:T	32074	62	78	0.410526	7.82386e-06	-0.0629334	0.0132911	0.012449
ENSG00000198954	rs10762253:70798719:C:T	50231	64	78	0.410526	1.71154e-06	-0.0703383	0.0137645	0.00428553
ENSG00000198954	rs3998842:70799101:T:C	50613	64	78	0.410526	1.86931e-06	-0.069979	0.0137517	0.00461492
ENSG00000079332	rs15801	3617	51	67	0.352632	3.47481e-06	0.0518844	0.0105089	0.00729823
ENSG00000079332	rs2394643:71911014:C:T	3968	51	67	0.352632	3.47481e-06	0.0518844	0.0105089	0.00729823
ENSG00000079332	rs9971029:71916461:G:A	9415	51	67	0.352632	3.49239e-06	0.0518999	0.0105147	0.00731852
ENSG00000079332	rs9971030:71916826:C:T	9780	51	67	0.352632	3.35745e-06	0.0520528	0.010525	0.00713581
ENSG00000079332	rs28391623:71917017:G:A	9971	51	67	0.352632	3.74272e-06	0.0518331	0.0105376	0.00768291
ENSG00000079332	rs10823489:71917181:A:C	10135	51	67	0.352632	3.49239e-06	0.0518999	0.0105147	0.00731852
ENSG00000079332	rs10823490:71919027:T:C	11981	51	67	0.352632	3.59531e-06	0.0518857	0.0105271	0.00747312
ENSG00000079332	rs10823491:71919188:G:A	12142	51	67	0.352632	3.59531e-06	0.0518857	0.0105271	0.00747312
ENSG00000079332	rs10999165:71919271:G:A	12225	51	67	0.352632	3.59531e-06	0.0518857	0.0105271	0.00747312
ENSG00000079332	rs6480443:71925446:T:C	18400	53	70	0.368421	4.23943e-06	0.0514705	0.0105299	0.00835471
ENSG00000079332	rs10159731:71926620:G:A	19574	53	69	0.363158	2.4254e-06	0.0532273	0.0105918	0.00563358
ENSG00000079332	rs7082396:71945511:C:A	38465	52	61	0.321053	1.78646e-05	0.0560202	0.0123816	0.0221338
ENSG00000172731	rs10823524:72114553:T:C	55823	63	78	0.410526	7.45566e-07	0.276681	0.0521113	0.00233512
ENSG00000172731	rs10740339:72115305:C:T	56575	58	70	0.368421	1.92891e-06	0.270858	0.0533068	0.00472517
ENSG00000172731	rs1904585:72116994:G:A	58264	62	80	0.421053	1.82159e-07	0.273978	0.0485805	0.000874953
ENSG00000172731	rs4747012:72117588:T:C	58858	44	54	0.284211	2.86308e-05	-0.239775	0.0544733	0.0306368
ENSG00000172731	rs10999292:72118370:G:T	59640	61	79	0.415789	1.29392e-07	0.274901	0.0480722	0.000698119
ENSG00000172731	rs10999293:72118430:C:T	59700	43	53	0.278947	1.9538e-05	-0.243874	0.0541784	0.0236035
ENSG00000172731	rs10823529	59925	62	80	0.421053	1.7966e-07	0.273816	0.0485243	0.000866893
ENSG00000172731	rs10999295:72120030:C:T	61300	62	80	0.421053	1.7034e-07	0.274369	0.0485166	0.000842461
ENSG00000172731	rs1904592	62294	49	60	0.315789	4.98011e-06	0.255713	0.0527453	0.00934252
ENSG00000172731	rs1904591:72121041:T:C	62311	62	80	0.421053	1.65232e-07	0.274653	0.0485064	0.000821956
ENSG00000172731	rs10823530:72121144:T:A	62414	49	60	0.315789	4.98011e-06	0.255713	0.0527453	0.00934252
ENSG00000172731	rs2894122:72121391:G:T	62661	62	80	0.421053	1.63451e-07	0.274802	0.0485114	0.000814282
ENSG00000172731	rs5021129:72121415:T:C	62685	49	60	0.315789	4.95824e-06	0.255838	0.0527591	0.00932402
ENSG00000172731	rs34374557:72122492:GT:G	63762	62	80	0.421053	1.63109e-07	0.274806	0.0485078	0.00081329
ENSG00000172731	rs10762370:72122952:T:G	64222	62	80	0.421053	1.96271e-07	0.272929	0.0485432	0.000913088
ENSG00000172731	rs35685392:72126071:C:G	67341	62	80	0.421053	1.57792e-07	0.275044	0.0484844	0.000790122
ENSG00000172731	rs10999300:72126592:G:T	67862	62	80	0.421053	1.56406e-07	0.275101	0.0484771	0.000784582
ENSG00000172731	rs35209943:72129632:TC:T	70902	47	59	0.310526	1.48695e-06	0.262431	0.0510158	0.00390062
ENSG00000172731	rs10762372:72129976:C:T	71246	45	56	0.294737	1.63894e-06	0.263448	0.0514486	0.00413428
ENSG00000172731	rs4746029:72130304:T:C	71574	42	52	0.273684	3.22086e-05	0.236648	0.0541435	0.033249
ENSG00000172731	rs4747017:72130456:A:G	71726	42	52	0.273684	3.30881e-05	0.236549	0.054209	0.0338676
ENSG00000172731	rs4747018:72130518:A:G	71788	45	57	0.3	1.20668e-06	0.261332	0.0503104	0.00334531
ENSG00000172731	rs113907397:72130587:GCAACA:G	71857	57	72	0.378947	1.87502e-06	0.256432	0.0503994	0.00462632
ENSG00000172731	rs10999302:72131150:C:T	72420	42	52	0.273684	3.31775e-05	-0.236452	0.0541956	0.0339294
ENSG00000172731	rs7350394	72460	42	52	0.273684	3.2261e-05	0.236528	0.0541213	0.033288
ENSG00000172731	rs7350395:72131256:A:T	72526	42	52	0.273684	3.2261e-05	0.236528	0.0541213	0.033288
ENSG00000172731	rs10740340:72131625:G:A	72895	42	52	0.273684	3.19206e-05	0.236721	0.0541309	0.0330436
ENSG00000172731	rs2127582:72131827:C:T	73097	42	52	0.273684	2.02857e-05	0.242874	0.0540733	0.0242282
ENSG00000172731	rs2127583:72131888:C:T	73158	42	52	0.273684	3.16395e-05	0.236857	0.0541333	0.0328232
ENSG00000172731	rs7921619:72142370:A:T	83640	57	72	0.378947	5.90403e-09	0.307481	0.0479567	8.42347e-05
ENSG00000166224	rs113583160:72579324:A:G	3606	14	16	0.0842105	2.35982e-06	0.0933949	0.01856	0.00551016
ENSG00000166224	rs75984275:72579968:T:C	4250	14	16	0.0842105	2.35982e-06	0.0933949	0.01856	0.00551016
ENSG00000166224	rs11594622:72580603:A:G	4885	14	16	0.0842105	2.35982e-06	0.0933949	0.01856	0.00551016
ENSG00000166224	rs35209210:72584509:T:A	8791	20	22	0.115789	1.73054e-05	0.0805434	0.0177695	0.0216248
ENSG00000166224	rs199576194:72585815:TAATC:T	10097	14	16	0.0842105	2.46532e-06	0.0932266	0.018566	0.00570968
ENSG00000166224	rs79263445:72586806:A:G	11088	14	16	0.0842105	2.39135e-06	0.0933094	0.018555	0.00557274
ENSG00000166224	rs79077873:72588871:C:T	13153	14	16	0.0842105	2.42361e-06	0.0932229	0.0185499	0.00563178
ENSG00000166224	rs79719524:72589395:G:A	13677	14	16	0.0842105	2.42361e-06	0.0932229	0.0185499	0.00563178
ENSG00000166224	rs77777950:72590023:G:A	14305	14	16	0.0842105	2.42361e-06	0.0932229	0.0185499	0.00563178
ENSG00000166224	rs7894181:72590090:C:T	14372	60	72	0.378947	4.74622e-05	-0.0526296	0.0123314	0.0428298
ENSG00000166224	rs75189301:72590118:G:C	14400	14	16	0.0842105	2.42361e-06	0.0932229	0.0185499	0.00563178
ENSG00000166224	rs10823627:72590824:G:A	15106	60	72	0.378947	4.74622e-05	-0.0526296	0.0123314	0.0428298
ENSG00000166224	rs113797326:72591000:C:A	15282	14	16	0.0842105	2.42361e-06	0.0932229	0.0185499	0.00563178
ENSG00000166224	rs80012015:72591607:C:T	15889	14	16	0.0842105	2.42361e-06	0.0932229	0.0185499	0.00563178
ENSG00000166224	rs77716871:72591697:A:G	15979	14	16	0.0842105	2.42361e-06	0.0932229	0.0185499	0.00563178
ENSG00000166224	rs79010869:72591904:G:A	16186	14	16	0.0842105	2.45661e-06	0.0931355	0.0185446	0.00569491
ENSG00000166224	rs78294476:72593812:G:A	18094	14	16	0.0842105	2.53033e-06	0.0929011	0.0185246	0.00583072
ENSG00000166224	rs7912398:72594458:C:T	18740	60	72	0.378947	4.8595e-05	-0.0525319	0.0123267	0.0435318
ENSG00000166224	rs11595680:72594745:G:T	19027	15	17	0.0894737	4.35613e-06	0.0892594	0.018286	0.00851837
ENSG00000166224	rs10599100:72594779:TCTC:T	19061	60	72	0.378947	4.86335e-05	-0.0525343	0.0123279	0.043542
ENSG00000166224	10:72595279:G:GT	19561	14	16	0.0842105	2.60265e-06	0.092718	0.0185136	0.00595668
ENSG00000166224	rs183047002:72595449:A:G	19731	14	16	0.0842105	2.60265e-06	0.092718	0.0185136	0.00595668
ENSG00000166224	rs12263714:72598500:C:T	22782	60	72	0.378947	4.88767e-05	-0.0525341	0.0123317	0.0436824
ENSG00000166224	rs79024079:72598622:G:T	22904	14	16	0.0842105	2.60265e-06	0.092718	0.0185136	0.00595668
ENSG00000166224	rs28604340:72603707:A:C	27989	15	17	0.0894737	4.13515e-06	0.0894448	0.0182757	0.00822511
ENSG00000166224	rs111788630:72604772:A:G	29054	14	16	0.0842105	2.0604e-06	0.0936934	0.0184979	0.00494656
ENSG00000166224	rs77601220:72605113:C:T	29395	14	16	0.0842105	2.71485e-06	0.0926227	0.0185327	0.00614237
ENSG00000166224	rs79658471:72605154:C:T	29436	14	16	0.0842105	2.0604e-06	0.0936934	0.0184979	0.00494656
ENSG00000166224	rs10823628:72608504:C:G	32786	62	74	0.389474	5.1236e-05	-0.0530641	0.0124931	0.0451456
ENSG00000166224	rs11594636:72610767:A:T	35049	15	17	0.0894737	4.19032e-06	0.0893581	0.0182702	0.008289
ENSG00000166224	rs79019914:72612036:T:C	36318	14	16	0.0842105	2.75418e-06	0.0925287	0.018527	0.00620402
ENSG00000166224	rs78693917:72612130:T:C	36412	15	17	0.0894737	4.19032e-06	0.0893581	0.0182702	0.008289
ENSG00000166224	rs1338642:72612923:C:G	37205	62	74	0.389474	5.25084e-05	-0.052965	0.0124891	0.0459151
ENSG00000166224	rs2171157:72614421:T:C	38703	61	73	0.384211	5.29116e-05	-0.0529325	0.0124875	0.0461112
ENSG00000166224	rs2297842:72617256:A:T	41538	59	71	0.373684	5.36469e-05	-0.05218	0.0123207	0.0465048
ENSG00000166224	rs10823630:72622906:G:A	47188	59	71	0.373684	5.59484e-05	-0.051994	0.0123096	0.0478206
ENSG00000166224	rs10762408:72623241:A:C	47523	61	73	0.384211	5.66497e-05	-0.0526254	0.0124689	0.0481898
ENSG00000166224	rs852121:72631237:G:A	55519	61	75	0.394737	3.68564e-05	0.0520157	0.0119986	0.0364218
ENSG00000166224	rs79739798:72632204:T:G	56486	14	16	0.0842105	9.69442e-06	0.0878771	0.0187738	0.0143608
ENSG00000166228	rs10999695:72904464:T:C	262426	15	15	0.0789474	3.80391e-05	0.128647	0.0297325	0.0370555
ENSG00000166228	rs145970437:72913809:A:G	271771	15	15	0.0789474	3.77092e-05	0.128606	0.0297073	0.0368479
ENSG00000166228	rs10999702:72918346:G:T	276308	15	15	0.0789474	3.75823e-05	0.128645	0.0297102	0.0367937
ENSG00000166228	rs1417909:72922367:C:T	280329	15	15	0.0789474	3.82925e-05	0.12844	0.0296969	0.0372068
ENSG00000166228	rs10999705:72924540:G:A	282502	15	15	0.0789474	3.82925e-05	0.12844	0.0296969	0.0372068
ENSG00000166228	rs10999711:72939048:T:C	297010	15	15	0.0789474	3.16804e-05	0.129754	0.0296573	0.0328536
ENSG00000166228	rs145735797:72939415:ACT:A	297377	15	15	0.0789474	3.13474e-05	0.12976	0.0296399	0.0325993
ENSG00000166228	rs10999713:72940016:C:T	297978	15	15	0.0789474	3.08475e-05	0.129802	0.0296208	0.0322236
ENSG00000166228	rs10823701:72946943:G:A	304905	16	16	0.0842105	3.36613e-05	0.130712	0.0299858	0.0342959
ENSG00000166228	rs10999720:72947126:G:A	305088	15	15	0.0789474	3.06261e-05	0.131945	0.0300968	0.0320505
ENSG00000166228	rs10823702:72947217:G:A	305179	16	16	0.0842105	3.38963e-05	0.130469	0.0299427	0.0344275
ENSG00000166228	rs10999721:72947600:C:T	305562	15	15	0.0789474	3.10472e-05	0.131558	0.0300332	0.0323679
ENSG00000197746	rs9415996	-51688	52	69	0.363158	2.52904e-05	-0.0558269	0.0125901	0.0280933
ENSG00000197746	rs9415047	-35047	68	94	0.494737	3.40408e-05	-0.0549578	0.0126161	0.034525
ENSG00000197746	rs9416002:73541427:T:C	-34629	68	94	0.494737	3.40408e-05	-0.0549578	0.0126161	0.034525
ENSG00000197746	rs11592462:73550117:C:G	-25939	69	95	0.5	2.30618e-05	-0.0564856	0.0126699	0.0263475
ENSG00000197746	rs12413995:73590657:C:T	14601	68	92	0.484211	1.98322e-07	-0.0696415	0.0123917	0.000921124
ENSG00000197746	rs2854990:73591149:T:C	15093	69	94	0.494737	1.00977e-06	-0.0651974	0.0124491	0.00294932
ENSG00000197746	rs41306532:73591829:G:A	15773	67	91	0.478947	3.50434e-07	-0.0677378	0.0123441	0.0013517
ENSG00000197746	rs6480560:73593443:T:C	17387	67	91	0.478947	3.12852e-06	-0.0621987	0.0125325	0.00677777
ENSG00000197746	rs3747855:73593913:A:G	17857	67	91	0.478947	3.59317e-07	-0.0675791	0.0123283	0.00138025
ENSG00000197746	rs3878001:73594358:C:T	18302	67	91	0.478947	3.5989e-07	-0.0675638	0.0123264	0.00138153
ENSG00000197746	rs762571:73594499:G:A	18443	61	79	0.415789	7.95292e-06	-0.0610643	0.0129076	0.0126133
ENSG00000197746	rs1811087:73594891:C:T	18835	69	94	0.494737	1.02335e-06	-0.0649932	0.0124177	0.00297196
ENSG00000197746	rs1867981:73595221:C:T	19165	68	92	0.484211	1.79827e-07	-0.0696111	0.0123366	0.000867533
ENSG00000197746	rs56041351:73595738:A:G	19682	69	94	0.494737	1.03062e-06	-0.064977	0.0124187	0.00298876
ENSG00000197746	rs720295:73597352:C:T	21296	68	92	0.484211	1.94895e-07	-0.0694851	0.012355	0.000908542
ENSG00000197746	rs728289	21904	69	94	0.494737	1.05902e-06	-0.0648395	0.0124078	0.00305221
ENSG00000197746	rs2394843:73598191:G:A	22135	69	94	0.494737	1.02712e-06	-0.0649591	0.0124133	0.00297962
ENSG00000197746	rs3061818:73598192:C:CAT	22136	62	80	0.421053	4.5924e-06	-0.0631613	0.0129742	0.00887928
ENSG00000197746	rs11277133:73598935:GGCAAATTGA:G	22879	68	92	0.484211	1.98551e-07	-0.0694465	0.0123576	0.000921687
ENSG00000197746	rs28535035:73599428:C:T	23372	62	80	0.421053	4.5924e-06	-0.0631613	0.0129742	0.00887928
ENSG00000197746	rs7899959:73600316:A:G	24260	68	92	0.484211	1.96024e-07	-0.0694708	0.0123554	0.000912448
ENSG00000197746	rs61853692:73600504:G:A	24448	69	95	0.5	5.03261e-07	-0.0659533	0.012208	0.00175547
ENSG00000197746	rs4747206:73600956:A:G	24900	62	80	0.421053	4.61507e-06	-0.0631818	0.0129817	0.00890973
ENSG00000197746	rs11598989:73601245:G:A	25189	69	95	0.5	5.04015e-07	-0.0659627	0.0122106	0.0017572
ENSG00000197746	rs58647707:73601274:G:A	25218	68	92	0.484211	1.99063e-07	-0.0694529	0.0123601	0.000923102
ENSG00000197746	rs9665661:73602240:C:T	26184	68	92	0.484211	1.99063e-07	-0.0694529	0.0123601	0.000923102
ENSG00000197746	rs9663508:73602452:T:C	26396	62	80	0.421053	4.61507e-06	-0.0631818	0.0129817	0.00890973
ENSG00000197746	rs6480561:73602934:G:C	26878	69	95	0.5	5.04015e-07	-0.0659627	0.0122106	0.0017572
ENSG00000197746	rs11596365:73604537:A:G	28481	62	80	0.421053	4.55681e-06	-0.0632283	0.0129828	0.00882294
ENSG00000197746	rs7922255:73605490:A:G	29434	62	80	0.421053	4.61507e-06	-0.0631818	0.0129817	0.00890973
ENSG00000197746	rs12413014:73606980:G:A	30924	67	90	0.473684	1.60554e-07	-0.0694276	0.0122473	0.000801775
ENSG00000197746	rs4747208:73607210:T:C	31154	62	80	0.421053	4.06355e-06	-0.0637647	0.0130171	0.00816491
ENSG00000197746	rs4237332:73607325:C:T	31269	62	80	0.421053	4.04772e-06	-0.0637965	0.013021	0.00813789
ENSG00000197746	rs2394846:73609059:G:C	33003	67	90	0.473684	1.61717e-07	-0.0695521	0.0122728	0.000806938
ENSG00000197746	rs59342015:73609814:G:GA	33758	67	91	0.478947	3.24966e-06	-0.0621764	0.0125516	0.0069623
ENSG00000197746	rs11592448:73610055:G:A	33999	67	92	0.484211	1.46556e-06	-0.0636443	0.0123638	0.00387006
ENSG00000197746	rs4747209:73611916:C:T	35860	59	74	0.389474	1.77182e-05	-0.0614883	0.0135838	0.0220171
ENSG00000197746	rs4537679:73622501:C:T	46445	65	83	0.436842	9.4532e-06	-0.0633402	0.0135134	0.0140687
ENSG00000197746	10:73635299:T:C	59243	66	86	0.452632	3.93482e-06	-0.0643347	0.0131122	0.00797094
ENSG00000197746	rs11593279:73636047:G:A	59991	67	87	0.457895	4.57856e-06	-0.0643902	0.0132246	0.00885602
ENSG00000197746	rs10823867:73656018:C:T	79962	54	64	0.336842	5.43424e-05	0.0612695	0.0144787	0.0468936
ENSG00000197746	rs7905071:73657579:T:C	81523	54	64	0.336842	5.42346e-05	0.061253	0.014473	0.0468266
ENSG00000197746	rs12781096:73657950:T:C	81894	54	64	0.336842	5.41842e-05	0.0612525	0.014472	0.0467993
ENSG00000197746	rs1917830:73658091:C:T	82035	54	64	0.336842	5.03993e-05	0.0616615	0.0145022	0.0446305
ENSG00000107745	rs2292366:74008833:C:A	-118266	11	12	0.0631579	5.12712e-05	0.100329	0.0236219	0.0451658
ENSG00000107745	rs7910711:74009118:G:T	-117981	11	12	0.0631579	5.12712e-05	0.100329	0.0236219	0.0451658
ENSG00000107745	rs4595469:74013151:T:G	-113948	12	14	0.0736842	5.70688e-05	0.0895105	0.0212184	0.0484438
ENSG00000107745	rs6480603:74014367:C:T	-112732	12	14	0.0736842	5.70688e-05	0.0895105	0.0212184	0.0484438
ENSG00000107745	rs7905495:74014866:C:T	-112233	12	14	0.0736842	5.70688e-05	0.0895105	0.0212184	0.0484438
ENSG00000165637	rs10824267:76843357:T:A	-126556	36	44	0.231579	3.29208e-05	-0.057351	0.0131389	0.0337315
ENSG00000165637	rs10824269:76847068:C:T	-122845	48	58	0.305263	2.44212e-05	-0.056183	0.0126444	0.0274432
ENSG00000165637	rs11001292:76852409:G:T	-117504	36	44	0.231579	3.43312e-05	-0.0571124	0.0131175	0.0346823
ENSG00000165637	rs4486565:76852590:G:C	-117323	36	44	0.231579	3.11387e-05	-0.0574357	0.0131142	0.0324353
ENSG00000165637	rs3740318:76855326:A:G	-114587	48	58	0.305263	2.39323e-05	-0.0560271	0.0125944	0.0270727
ENSG00000165637	rs3740317:76855412:G:A	-114501	48	58	0.305263	2.38188e-05	-0.056032	0.012592	0.0269888
ENSG00000165637	rs12256732:76856830:T:C	-113083	36	44	0.231579	3.64608e-05	-0.0569816	0.0131354	0.0361802
ENSG00000165637	rs3824742:76857364:C:G	-112549	37	45	0.236842	2.52856e-05	-0.0579781	0.0130751	0.0280898
ENSG00000165637	rs3740315:76857716:A:G	-112197	36	44	0.231579	3.64608e-05	-0.0569816	0.0131354	0.0361802
ENSG00000165637	rs12413582:76858226:C:T	-111687	36	44	0.231579	3.21391e-05	-0.0572442	0.0130954	0.0331893
ENSG00000165637	rs10762657:76858765:C:T	-111148	36	44	0.231579	3.21391e-05	-0.0572442	0.0130954	0.0331893
ENSG00000165637	rs3832680:76858961:CT:C	-110952	36	44	0.231579	3.21391e-05	-0.0572442	0.0130954	0.0331893
ENSG00000165637	rs12356553:76862697:C:T	-107216	36	44	0.231579	3.21391e-05	-0.0572442	0.0130954	0.0331893
ENSG00000165637	rs7905015:76863090:A:G	-106823	52	65	0.342105	4.61084e-05	-0.0518681	0.012131	0.0420028
ENSG00000165637	rs4746263:76863356:A:G	-106557	52	65	0.342105	5.70532e-05	-0.0514717	0.0122011	0.0484369
ENSG00000165637	rs11001294:76867309:C:T	-102604	52	65	0.342105	4.52536e-05	-0.0519119	0.0121271	0.0415579
ENSG00000165637	rs7912300	-102014	52	65	0.342105	4.52536e-05	-0.0519119	0.0121271	0.0415579
ENSG00000165637	rs10824274	-101446	36	44	0.231579	3.21391e-05	-0.0572442	0.0130954	0.0331893
ENSG00000165637	rs11001299:76879687:G:A	-90226	36	44	0.231579	5.99828e-05	-0.0555224	0.0132035	0.0499942
ENSG00000165637	rs34088482:76880663:C:T	-89250	36	44	0.231579	5.99828e-05	-0.0555224	0.0132035	0.0499942
ENSG00000165637	rs10824279:76884706:T:C	-85207	36	44	0.231579	5.99167e-05	-0.0555198	0.0132019	0.049963
ENSG00000165637	rs10824282:76894981:C:T	-74932	36	44	0.231579	5.96509e-05	-0.0555395	0.0132029	0.0498395
ENSG00000165637	rs74798749:76909876:GT:G	-60037	36	44	0.231579	5.80416e-05	-0.055568	0.0131865	0.0490096
ENSG00000165637	rs2938852:76913878:G:T	-56035	36	44	0.231579	5.80416e-05	-0.055568	0.0131865	0.0490096
ENSG00000165637	rs2657288:76914699:G:A	-55214	36	44	0.231579	5.80416e-05	-0.055568	0.0131865	0.0490096
ENSG00000165637	rs2804521:76914807:A:G	-55106	36	44	0.231579	5.80416e-05	-0.055568	0.0131865	0.0490096
ENSG00000165637	rs2657287:76915015:C:T	-54898	36	44	0.231579	5.80416e-05	-0.055568	0.0131865	0.0490096
ENSG00000165637	rs2997753:76923437:T:A	-46476	36	44	0.231579	5.79992e-05	-0.0555633	0.0131848	0.0489901
ENSG00000165637	rs11001311:76924120:G:C	-45793	31	39	0.205263	2.35362e-05	-0.0586814	0.0131781	0.0267349
ENSG00000165637	rs2657292:76926076:A:G	-43837	36	44	0.231579	5.79992e-05	-0.0555633	0.0131848	0.0489901
ENSG00000165637	rs12219584:76931305:C:A	-38608	36	44	0.231579	5.79992e-05	-0.0555633	0.0131848	0.0489901
ENSG00000165637	rs10824287:76934101:A:T	-35812	36	44	0.231579	5.79992e-05	-0.0555633	0.0131848	0.0489901
ENSG00000165637	rs2804527:76935511:T:C	-34402	36	44	0.231579	5.79992e-05	-0.0555633	0.0131848	0.0489901
ENSG00000165637	rs2804528:76937575:T:A	-32338	36	44	0.231579	5.79992e-05	-0.0555633	0.0131848	0.0489901
ENSG00000165637	rs2804529:76938263:T:A	-31650	36	44	0.231579	5.79992e-05	-0.0555633	0.0131848	0.0489901
ENSG00000165637	rs1910870:76939342:T:A	-30571	31	39	0.205263	2.23286e-05	-0.0588145	0.0131675	0.025791
ENSG00000165637	rs10824288:76943648:G:A	-26265	36	44	0.231579	5.77239e-05	-0.0555836	0.0131856	0.0488264
ENSG00000165637	rs72805366:76950670:A:G	-19243	36	44	0.231579	5.68051e-05	-0.0557397	0.0132091	0.0482835
ENSG00000165637	rs11001318:76950801:A:G	-19112	36	44	0.231579	5.68421e-05	-0.0557443	0.0132108	0.0483113
ENSG00000165637	rs2804531:76956633:C:T	-13280	45	54	0.284211	6.66659e-06	-0.0607189	0.0127154	0.0111069
ENSG00000165637	rs879154:76961332:C:A	-8581	42	50	0.263158	1.06836e-06	-0.0663802	0.0127078	0.00307316
ENSG00000165637	rs4746272:76963627:G:A	-6286	70	94	0.494737	7.87381e-06	-0.0554867	0.0117224	0.0125151
ENSG00000165637	rs2657290:76967162:C:T	-2751	70	95	0.5	4.2724e-06	-0.0562473	0.0115116	0.00839983
ENSG00000165637	rs2804533:76967481:G:T	-2432	70	94	0.494737	8.71666e-06	-0.0551551	0.0117158	0.0133143
ENSG00000165637	rs2804534:76967781:T:G	-2132	70	94	0.494737	8.71666e-06	-0.0551551	0.0117158	0.0133143
ENSG00000165637	rs2804535:76971844:C:T	1931	70	94	0.494737	1.01549e-05	-0.0547206	0.0117198	0.0148996
ENSG00000165637	rs4746275:76974698:G:T	4785	70	94	0.494737	1.11534e-05	-0.0542959	0.0116885	0.0159013
ENSG00000165637	rs111273803:76978705:A:AAGG	8792	70	94	0.494737	1.32532e-05	-0.0539035	0.0117151	0.0181233
ENSG00000165637	rs1259497:76982863:T:C	12950	70	94	0.494737	1.2792e-05	-0.0540307	0.0117196	0.0176039
ENSG00000165637	rs1259498	16828	69	92	0.484211	5.20062e-05	-0.0502654	0.0118453	0.045609
ENSG00000165637	rs59508378:76988032:C:CT	18119	35	44	0.231579	1.4083e-05	-0.0588323	0.0128296	0.0189047
ENSG00000165637	rs1259499:76988066:T:G	18153	70	94	0.494737	1.35595e-05	-0.0538004	0.0117075	0.0183949
ENSG00000165637	rs1259501:76990185:G:A	20272	70	94	0.494737	1.16535e-05	-0.0541138	0.0116774	0.0164411
ENSG00000165637	rs1259504:76993015:C:T	23102	33	41	0.215789	1.04669e-05	-0.0611015	0.013108	0.0151904
ENSG00000165637	rs1259505:76996941:T:C	27028	69	93	0.489474	2.55186e-05	-0.0520888	0.0117533	0.0282477
ENSG00000165637	rs1259508:76998092:A:G	28179	70	94	0.494737	1.12798e-05	-0.0541899	0.0116729	0.016035
ENSG00000165637	rs36066831:77002679:TC:T	32766	35	43	0.226316	2.68782e-05	-0.0580299	0.0131341	0.0292272
ENSG00000165637	rs1777414:77034063:T:C	64150	49	62	0.326316	4.28718e-05	0.0518651	0.0120755	0.0399504
ENSG00000148655	rs7078507:77140864:A:G	-220135	66	89	0.468421	5.82366e-05	0.168356	0.0399603	0.0491348
ENSG00000151208	rs78608389:78991766:C:T	-558784	12	12	0.0631579	1.71946e-05	-0.146363	0.0322789	0.0215107
ENSG00000225484	rs372096578:81638450:T:A	74636	20	20	0.105263	4.77726e-07	-0.254972	0.0470886	0.0016848
ENSG00000225484	rs12763012:81641198:T:C	77384	20	20	0.105263	4.69201e-07	-0.254676	0.0469972	0.00166138
ENSG00000225484	rs71481530:81643234:A:C	79420	20	20	0.105263	4.69201e-07	-0.254676	0.0469972	0.00166138
ENSG00000225484	rs7901746:81685476:A:C	121662	49	57	0.3	2.83001e-05	-0.13492	0.0306306	0.0303634
ENSG00000225484	rs138686009:81899975:T:TA	336161	30	35	0.184211	4.37293e-05	-0.148346	0.0345813	0.0404954
ENSG00000122378	rs7077847:82134952:A:G	-32634	42	52	0.273684	5.57941e-05	0.0985905	0.0233372	0.0477281
ENSG00000122378	rs7082093:82134954:T:G	-32632	42	52	0.273684	5.57941e-05	0.0985905	0.0233372	0.0477281
ENSG00000122378	rs61859213:82145042:A:G	-22544	45	55	0.289474	5.96281e-05	0.0985657	0.0234305	0.0498311
ENSG00000122378	rs370435202:82145044:T:C	-22542	45	55	0.289474	5.96281e-05	0.0985657	0.0234305	0.0498311
ENSG00000122378	rs374683514:82145046:C:T	-22540	45	55	0.289474	5.96281e-05	0.0985657	0.0234305	0.0498311
ENSG00000122378	10:82145047:G:GC	-22539	45	55	0.289474	5.96281e-05	0.0985657	0.0234305	0.0498311
ENSG00000122378	10:82145048:A:AC	-22538	45	55	0.289474	5.96281e-05	0.0985657	0.0234305	0.0498311
ENSG00000152778	rs304493:91142586:A:G	-31758	47	58	0.305263	3.24819e-05	-0.269639	0.0617231	0.0334456
ENSG00000152778	rs2481931:91160092:G:A	-14252	42	49	0.257895	2.75137e-05	-0.296107	0.0671119	0.0297158
ENSG00000148680	rs7914755:92446898:C:A	-53681	39	44	0.231579	1.39082e-06	0.127553	0.0247184	0.00369957
ENSG00000148680	rs2096351:92447479:G:A	-53100	66	80	0.421053	4.00233e-05	0.100805	0.0233705	0.0381725
ENSG00000148680	rs2105411:92447675:C:T	-52904	65	79	0.415789	4.211e-05	0.0997209	0.0231919	0.0394442
ENSG00000148680	rs7923597:92448753:G:A	-51826	42	48	0.252632	8.70185e-06	0.116003	0.0246386	0.0133046
ENSG00000148680	rs10881818:92448883:G:A	-51696	65	79	0.415789	4.19841e-05	0.0997353	0.0231909	0.0393505
ENSG00000148680	rs5786925:92449390:AT:A	-51189	64	77	0.405263	8.1166e-06	0.109071	0.0230802	0.0127945
ENSG00000148680	rs2105409:92449417:C:G	-51162	65	78	0.410526	9.09157e-06	0.109064	0.0232195	0.0137194
ENSG00000148680	rs10881820:92449600:T:C	-50979	65	79	0.415789	4.10807e-05	0.0998561	0.0231879	0.0388653
ENSG00000148680	rs11186272:92449737:C:T	-50842	42	48	0.252632	8.68592e-06	0.115937	0.0246222	0.0132884
ENSG00000148680	rs7896481:92449817:A:C	-50762	65	79	0.415789	4.10807e-05	0.0998561	0.0231879	0.0388653
ENSG00000148680	rs7913864:92450288:T:C	-50291	66	80	0.421053	3.8499e-05	0.10102	0.0233646	0.0372229
ENSG00000148680	rs7913197:92451763:A:C	-48816	42	48	0.252632	8.63114e-06	0.11573	0.0245699	0.0132344
ENSG00000148680	rs7913555:92451840:G:A	-48739	39	44	0.231579	1.24052e-06	0.128647	0.0247982	0.00341483
ENSG00000148680	rs61020448:92452060:C:CAGTT	-48519	39	44	0.231579	1.24052e-06	0.128647	0.0247982	0.00341483
ENSG00000148680	rs7913631:92452133:A:G	-48446	42	48	0.252632	7.49415e-06	0.11649	0.0245458	0.0120505
ENSG00000148680	rs7913746:92452173:A:G	-48406	65	79	0.415789	3.921e-05	0.100076	0.0231723	0.0376681
ENSG00000148680	rs2489291:92452398:T:C	-48181	61	80	0.421053	1.26466e-05	-0.0955327	0.0207086	0.0174735
ENSG00000148680	rs12248435:92453475:T:G	-47104	39	44	0.231579	1.30022e-06	0.128444	0.0248131	0.00351065
ENSG00000148680	rs59886855:92453956:A:C	-46623	39	44	0.231579	1.25023e-06	0.128574	0.0247931	0.00343165
ENSG00000148680	rs61048088:92454173:A:G	-46406	42	48	0.252632	8.62883e-06	0.115558	0.0245331	0.0132332
ENSG00000148680	rs200582379:92455020:C:T	-45559	65	79	0.415789	3.89217e-05	0.100111	0.02317	0.0375039
ENSG00000148680	rs7899936:92455763:G:A	-44816	42	48	0.252632	8.62277e-06	0.115546	0.0245296	0.0132272
ENSG00000148680	rs2800147:92455769:C:T	-44810	61	80	0.421053	1.24387e-05	-0.0955391	0.020691	0.0172616
ENSG00000148680	rs7916485:92455891:T:C	-44688	39	44	0.231579	1.25015e-06	0.128554	0.0247892	0.00343165
ENSG00000148680	rs2800146:92456074:C:T	-44505	61	80	0.421053	1.24978e-05	-0.095509	0.0206899	0.017319
ENSG00000148680	rs2800145:92456132:T:C	-44447	61	80	0.421053	1.24387e-05	-0.0955391	0.020691	0.0172616
ENSG00000148680	rs7900519:92456239:G:A	-44340	42	48	0.252632	8.62277e-06	0.115546	0.0245296	0.0132272
ENSG00000148680	rs74148818:92456528:C:G	-44051	42	48	0.252632	8.32205e-06	0.115755	0.0245273	0.0130015
ENSG00000148680	rs74148819:92456553:G:A	-44026	42	48	0.252632	8.62277e-06	0.115546	0.0245296	0.0132272
ENSG00000148680	rs17525184:92456589:C:T	-43990	39	44	0.231579	1.25015e-06	0.128554	0.0247892	0.00343165
ENSG00000148680	rs17098924	-43912	42	48	0.252632	8.63098e-06	0.11551	0.0245231	0.0132344
ENSG00000148680	rs11186275:92456882:G:T	-43697	42	48	0.252632	8.63098e-06	0.11551	0.0245231	0.0132344
ENSG00000148680	rs12256617:92457187:T:G	-43392	42	48	0.252632	8.63098e-06	0.11551	0.0245231	0.0132344
ENSG00000148680	rs1892110	-43333	42	49	0.257895	3.63777e-06	0.11654	0.0236588	0.00753492
ENSG00000148680	rs2000322:92457445:G:A	-43134	65	79	0.415789	3.80195e-05	0.100232	0.0231646	0.0370451
ENSG00000148680	rs12265378:92457889:A:C	-42690	39	44	0.231579	1.25018e-06	0.128534	0.0247853	0.00343165
ENSG00000148680	rs11186276:92458193:T:G	-42386	42	48	0.252632	8.35004e-06	0.115809	0.0245432	0.0130296
ENSG00000148680	rs2800144:92463145:T:C	-37434	63	83	0.436842	1.05684e-05	-0.0969346	0.0208062	0.0152938
ENSG00000148680	rs1936572:92466089:C:T	-34490	59	77	0.405263	3.02033e-05	-0.0916264	0.0208827	0.0317336
ENSG00000148680	rs1936571:92466432:A:G	-34147	59	77	0.405263	3.02033e-05	-0.0916264	0.0208827	0.0317336
ENSG00000148680	rs10600603:92467130:GCTCT:G	-33449	39	44	0.231579	1.25018e-06	0.128534	0.0247853	0.00343165
ENSG00000148680	rs2800140:92468035:T:G	-32544	61	80	0.421053	1.23881e-05	-0.0955222	0.0206827	0.0172146
ENSG00000148680	rs1857586	-29802	59	77	0.405263	3.03992e-05	-0.0915936	0.0208833	0.031882
ENSG00000148680	rs2154134:92471403:G:A	-29176	59	77	0.405263	3.03992e-05	-0.0915936	0.0208833	0.031882
ENSG00000148680	rs1936621:92471984:G:C	-28595	59	77	0.405263	3.03992e-05	-0.0915936	0.0208833	0.031882
ENSG00000148680	rs1936620:92472084:A:G	-28495	59	77	0.405263	3.03992e-05	-0.0915936	0.0208833	0.031882
ENSG00000148680	rs12259754:92472510:G:T	-28069	39	44	0.231579	1.29275e-06	0.128448	0.0248072	0.00351065
ENSG00000148680	rs12244858:92472559:A:G	-28020	39	44	0.231579	1.25018e-06	0.128534	0.0247853	0.00343165
ENSG00000148680	rs1419355:92472561:T:C	-28018	59	77	0.405263	3.03992e-05	-0.0915936	0.0208833	0.031882
ENSG00000148680	rs2710721:92473378:T:C	-27201	59	77	0.405263	3.03992e-05	-0.0915936	0.0208833	0.031882
ENSG00000148680	rs11186283:92474125:C:T	-26454	39	44	0.231579	1.25018e-06	0.128534	0.0247853	0.00343165
ENSG00000148680	rs1274445:92475254:A:G	-25325	61	80	0.421053	1.23881e-05	0.0955222	0.0206827	0.0172146
ENSG00000148680	rs11186284:92475435:G:A	-25144	39	44	0.231579	1.25018e-06	0.128534	0.0247853	0.00343165
ENSG00000148680	rs1274443:92475674:G:A	-24905	61	80	0.421053	1.23881e-05	0.0955222	0.0206827	0.0172146
ENSG00000148680	rs5786926:92476338:A:ATTTAAC	-24241	61	80	0.421053	1.20607e-05	0.0956993	0.0206904	0.0168788
ENSG00000148680	rs11186286	-23503	40	46	0.242105	8.64074e-07	0.126329	0.0239517	0.00260517
ENSG00000148680	rs1274441:92477258:C:G	-23321	52	68	0.357895	5.97151e-06	0.0982414	0.020455	0.0104218
ENSG00000148680	rs7071656:92477634:C:A	-22945	40	46	0.242105	8.64074e-07	0.126329	0.0239517	0.00260517
ENSG00000148680	rs2795317:92477844:T:C	-22735	61	80	0.421053	1.23881e-05	0.0955222	0.0206827	0.0172146
ENSG00000148680	rs7072840:92478283:G:T	-22296	39	44	0.231579	1.25084e-06	0.128552	0.0247894	0.0034325
ENSG00000148680	rs7095540:92479410:T:G	-21169	40	46	0.242105	7.86294e-07	0.126949	0.0239672	0.00243545
ENSG00000148680	rs1539723:92479457:T:C	-21122	52	68	0.357895	5.70242e-06	-0.0980781	0.0203722	0.0101039
ENSG00000148680	rs7098983:92479509:T:A	-21070	39	44	0.231579	9.69258e-07	0.129418	0.0246657	0.0028591
ENSG00000148680	rs2800134:92480047:T:C	-20532	61	80	0.421053	2.79066e-05	-0.0919187	0.0208507	0.0300352
ENSG00000148680	rs7071278:92483401:A:T	-17178	39	44	0.231579	1.13596e-06	0.129267	0.0248166	0.00321611
ENSG00000148680	rs1954505:92485073:T:C	-15506	61	80	0.421053	1.19075e-05	-0.0957154	0.0206793	0.0167145
ENSG00000148680	rs1274453:92485934:A:G	-14645	67	91	0.478947	5.7462e-06	0.0975847	0.0202777	0.010153
ENSG00000148680	rs1274452:92488725:G:A	-11854	65	91	0.478947	5.6242e-05	0.0845442	0.0200225	0.0479867
ENSG00000148680	rs59372295:92489744:G:A	-10835	43	51	0.268421	4.42491e-08	0.131725	0.0220905	0.000326756
ENSG00000148680	rs10082552:92489903:A:C	-10676	61	81	0.426316	9.01966e-06	0.0957507	0.0203764	0.0136343
ENSG00000148680	rs56972023:92490703:C:T	-9876	44	52	0.273684	2.47019e-07	0.125394	0.0225162	0.00108587
ENSG00000148680	rs1274448:92490929:C:T	-9650	61	80	0.421053	1.19075e-05	0.0957154	0.0206793	0.0167145
ENSG00000148680	rs1274447:92491883:C:G	-8696	61	80	0.421053	1.1922e-05	0.0957038	0.0206782	0.0167328
ENSG00000148680	rs57830765:92495343:ATACTTAGT:A	-5236	43	51	0.268421	4.94903e-08	0.131102	0.0220798	0.000360193
ENSG00000148680	rs10596134:92495834:TAC:T	-4745	66	85	0.447368	1.32736e-05	0.100235	0.0217864	0.0181468
ENSG00000148680	rs11817364:92498026:G:A	-2553	43	51	0.268421	3.4276e-07	0.123756	0.0225311	0.00132886
ENSG00000148680	rs1274446:92499618:T:C	-961	61	81	0.426316	9.35267e-06	0.0954962	0.020362	0.0139798
ENSG00000148680	rs1045949:92500724:C:T	145	61	80	0.421053	1.23881e-05	0.0955222	0.0206827	0.0172146
ENSG00000148680	rs11432480:92502858:T:TA	2279	43	51	0.268421	3.4276e-07	0.123756	0.0225311	0.00132886
ENSG00000148680	rs11186297:92504318:T:C	3739	61	81	0.426316	9.35267e-06	0.0954962	0.020362	0.0139798
ENSG00000148680	rs11812708:92505265:T:C	4686	42	50	0.263158	6.27549e-08	0.130134	0.0221173	0.000432256
ENSG00000148680	rs1935347:92505404:G:A	4825	61	80	0.421053	1.23881e-05	0.0955222	0.0206827	0.0172146
ENSG00000148680	rs57768581:92507378:A:C	6799	42	50	0.263158	6.27549e-08	0.130134	0.0221173	0.000432256
ENSG00000148680	rs4933194:92511367:T:C	10788	61	80	0.421053	1.23085e-05	0.0955527	0.0206819	0.0171338
ENSG00000148680	rs7916848:92513877:T:A	13298	61	81	0.426316	9.35267e-06	0.0954962	0.020362	0.0139798
ENSG00000148680	rs7900386:92514030:C:A	13451	61	81	0.426316	9.35267e-06	0.0954962	0.020362	0.0139798
ENSG00000148680	rs11186300	14160	61	80	0.421053	1.23881e-05	0.0955222	0.0206827	0.0172146
ENSG00000148680	rs7903572:92518243:T:C	17664	61	80	0.421053	1.22684e-05	0.0955912	0.0206865	0.0170946
ENSG00000148680	rs56662980:92518358:A:C	17779	42	50	0.263158	6.28329e-08	0.130144	0.0221201	0.000432256
ENSG00000148680	rs58132737:92519178:C:T	18599	42	50	0.263158	6.28329e-08	0.130144	0.0221201	0.000432256
ENSG00000148680	rs7922531:92519184:A:G	18605	61	80	0.421053	1.1753e-05	0.0957821	0.0206788	0.0165532
ENSG00000148680	rs59371013:92519356:G:A	18777	42	50	0.263158	6.28329e-08	0.130144	0.0221201	0.000432256
ENSG00000148680	rs56260956:92519413:T:C	18834	61	81	0.426316	8.81543e-06	0.0958353	0.0203693	0.0134258
ENSG00000148680	rs7912164:92519954:T:C	19375	42	50	0.263158	6.28329e-08	0.130144	0.0221201	0.000432256
ENSG00000148680	rs74701947:92520832:T:C	20253	42	50	0.263158	6.18639e-08	0.130218	0.0221194	0.000427656
ENSG00000148680	rs34059202:92523177:C:CT	22598	42	50	0.263158	6.18639e-08	0.130218	0.0221194	0.000427656
ENSG00000148680	rs11817665:92524640:T:C	24061	42	50	0.263158	6.09141e-08	0.130292	0.0221187	0.000422574
ENSG00000148680	rs4113478:92524708:G:T	24129	61	81	0.426316	8.03445e-06	0.0965134	0.0204118	0.0127096
ENSG00000148680	rs35382478:92525281:A:AT	24702	44	52	0.273684	3.54638e-07	0.124486	0.0226971	0.00136495
ENSG00000148680	rs4262637:92526004:T:C	25425	42	50	0.263158	6.09432e-08	0.130305	0.0221214	0.000422574
ENSG00000148680	rs2420367:92526183:C:A	25604	61	80	0.421053	1.01708e-05	0.0968772	0.0207505	0.014903
ENSG00000148680	rs11315830:92528003:CA:C	27424	42	50	0.263158	6.00919e-08	0.130388	0.0221234	0.000417688
ENSG00000148680	rs7907728:92528179:A:T	27600	42	50	0.263158	6.00919e-08	0.130388	0.0221234	0.000417688
ENSG00000148680	rs7072526:92529270:T:C	28691	42	50	0.263158	6.00919e-08	0.130388	0.0221234	0.000417688
ENSG00000148680	rs60226639:92529829:A:G	29250	44	53	0.278947	1.97592e-07	0.123254	0.0219281	0.000918117
ENSG00000148680	rs4933606:92531394:A:G	30815	42	50	0.263158	6.00919e-08	0.130388	0.0221234	0.000417688
ENSG00000148680	rs1418212:92531600:C:G	31021	61	81	0.426316	7.2999e-06	0.0971709	0.0204465	0.0118397
ENSG00000148680	rs60873034:92531691:G:A	31112	44	53	0.278947	2.09793e-07	0.12323	0.0219779	0.000959406
ENSG00000148680	rs35209059:92533216:TACAA:T	32637	42	50	0.263158	6.28289e-08	0.130569	0.0221923	0.000432256
ENSG00000148680	rs4471341:92533282:C:G	32703	61	81	0.426316	7.18508e-06	0.0972094	0.0204375	0.0116902
ENSG00000148680	rs7086484:92533729:G:A	33150	49	59	0.310526	5.8472e-08	0.127001	0.0215261	0.000409847
ENSG00000148680	rs7091039:92534755:A:T	34176	43	51	0.268421	3.0751e-08	0.133845	0.0221416	0.000258047
ENSG00000148680	rs35731601:92536643:A:AG	36064	43	51	0.268421	3.33248e-08	0.133212	0.022103	0.000274971
ENSG00000148680	rs79778749:92537399:T:C	36820	45	54	0.284211	1.08029e-07	0.126358	0.0219375	0.000619775
ENSG00000148680	rs36101610:92540879:C:A	40300	46	55	0.289474	6.34636e-08	0.128334	0.0218208	0.000434757
ENSG00000148680	rs78472578:92542241:T:C	41662	48	59	0.310526	5.32369e-07	0.115489	0.0214296	0.00183768
ENSG00000148680	rs4933607:92545069:G:A	44490	46	55	0.289474	6.47712e-08	0.128209	0.0218167	0.000441414
ENSG00000148680	rs12412496:92546165:G:A	45586	46	55	0.289474	6.47712e-08	0.128209	0.0218167	0.000441414
ENSG00000148680	rs12413941:92546406:T:C	45827	48	59	0.310526	5.38595e-07	0.115413	0.0214265	0.00185281
ENSG00000148680	rs7090415:92547308:G:A	46729	48	59	0.310526	5.38595e-07	0.115413	0.0214265	0.00185281
ENSG00000148680	rs10881832:92548763:C:T	48184	60	78	0.410526	5.08068e-06	0.100867	0.0208269	0.00944395
ENSG00000148680	rs35731058:92549295:G:A	48716	46	55	0.289474	4.30145e-08	0.129369	0.0216722	0.000319943
ENSG00000148680	rs4272713:92549972:A:G	49393	46	55	0.289474	4.30145e-08	0.129369	0.0216722	0.000319943
ENSG00000148680	rs11472590:92553215:T:TTA	52636	58	73	0.384211	2.3004e-07	0.11558	0.0206925	0.00102969
ENSG00000148680	rs4933608:92559787:C:T	59208	46	55	0.289474	4.30145e-08	0.129369	0.0216722	0.000319943
ENSG00000148680	rs7916403	59329	66	92	0.484211	3.15117e-08	0.112718	0.0186637	0.000263376
ENSG00000148680	rs34457518:92559959:T:TG	59380	47	58	0.305263	8.01375e-08	0.12189	0.0209139	0.00051289
ENSG00000148680	rs12785051:92560328:T:A	59749	46	55	0.289474	4.30145e-08	0.129369	0.0216722	0.000319943
ENSG00000148680	rs12783703:92560413:A:G	59834	50	62	0.326316	1.01245e-06	0.111277	0.0212503	0.00295563
ENSG00000148680	rs12764938:92560714:C:T	60135	46	55	0.289474	4.30145e-08	0.129369	0.0216722	0.000319943
ENSG00000148680	rs35598406:92561300:C:A	60721	47	58	0.305263	8.01375e-08	0.12189	0.0209139	0.00051289
ENSG00000148680	rs11186309	60978	47	58	0.305263	8.01375e-08	0.12189	0.0209139	0.00051289
ENSG00000148680	rs1418214:92562377:C:A	61798	46	55	0.289474	4.30145e-08	0.129369	0.0216722	0.000319943
ENSG00000148680	rs12766851:92562831:C:T	62252	46	55	0.289474	4.30145e-08	0.129369	0.0216722	0.000319943
ENSG00000148680	rs7090941:92563148:C:T	62569	48	59	0.310526	3.69908e-07	0.116647	0.0213062	0.00141085
ENSG00000148680	rs7075333:92563400:T:C	62821	47	58	0.305263	8.01375e-08	0.12189	0.0209139	0.00051289
ENSG00000148680	rs11594548:92564191:G:A	63612	47	58	0.305263	8.01375e-08	0.12189	0.0209139	0.00051289
ENSG00000148680	rs1573935:92564827:A:G	64248	68	93	0.489474	3.05642e-08	0.116601	0.0192847	0.000256858
ENSG00000148680	rs1935351:92565725:C:T	65146	47	58	0.305263	8.01375e-08	0.12189	0.0209139	0.00051289
ENSG00000148680	rs4350278:92566137:C:A	65558	47	58	0.305263	7.5717e-08	0.122119	0.0209068	0.000494167
ENSG00000148680	rs4350279:92566171:C:T	65592	46	55	0.289474	4.06472e-08	0.129645	0.0216721	0.000305931
ENSG00000148680	rs2185708:92566370:A:G	65791	47	58	0.305263	7.16111e-08	0.122342	0.0208996	0.000477283
ENSG00000148680	rs2185707:92566379:T:A	65800	47	58	0.305263	7.16111e-08	0.122342	0.0208996	0.000477283
ENSG00000148680	rs58868307:92567156:C:A	66577	46	55	0.289474	2.51125e-08	0.131018	0.0215122	0.000224291
ENSG00000148680	rs57825126:92567360:A:C	66781	48	59	0.310526	2.58309e-07	0.118166	0.0212581	0.00112669
ENSG00000148680	rs60748043:92567528:C:T	66949	47	58	0.305263	5.27851e-08	0.123526	0.0208551	0.00037726
ENSG00000148680	rs148617174:92567718:A:G	67139	47	58	0.305263	4.99661e-08	0.123735	0.0208466	0.000363154
ENSG00000148680	rs60135579:92567802:G:A	67223	47	58	0.305263	4.8551e-08	0.123839	0.0208414	0.00035358
ENSG00000148680	rs61218433:92567814:A:G	67235	48	59	0.310526	1.29428e-07	0.120914	0.0211446	0.000698119
ENSG00000148680	rs115780035:92567859:C:T	67280	47	58	0.305263	4.85053e-08	0.123881	0.0208477	0.000353398
ENSG00000148680	rs59277098:92568031:T:C	67452	48	59	0.310526	2.06226e-07	0.118693	0.0211539	0.000949703
ENSG00000148680	rs12777727:92568293:A:G	67714	47	58	0.305263	4.36277e-08	0.124235	0.0208234	0.000322677
ENSG00000148680	rs12777881:92568294:C:T	67715	48	59	0.310526	5.26489e-08	0.124018	0.0209361	0.000376736
ENSG00000148680	rs12779377:92568349:T:C	67770	48	59	0.310526	2.05784e-07	0.119067	0.0212186	0.000948457
ENSG00000148680	rs12779610:92568463:T:C	67884	47	58	0.305263	4.13353e-08	0.124435	0.0208143	0.000309813
ENSG00000148680	rs12784621:92568534:T:C	67955	47	58	0.305263	4.1464e-08	0.124431	0.0208161	0.000310323
ENSG00000148680	rs12784014:92568957:C:T	68378	47	58	0.305263	3.72234e-08	0.124812	0.0207951	0.000293039
ENSG00000148680	rs12761148:92568958:T:C	68379	47	58	0.305263	3.61865e-08	0.12491	0.0207895	0.000288363
ENSG00000148680	rs11817810:92569442:C:T	68863	45	54	0.284211	1.71839e-08	0.132709	0.0214908	0.000169407
ENSG00000148680	rs149005609:92569534:A:G	68955	48	59	0.310526	1.5676e-07	0.120095	0.0211645	0.00078576
ENSG00000148680	rs138704692:92569757:C:T	69178	45	54	0.284211	1.59826e-08	0.132968	0.0214766	0.000163561
ENSG00000148680	rs201425777:92570266:T:TC	69687	47	58	0.305263	2.6708e-08	0.125968	0.02073	0.000235211
ENSG00000148680	rs138692846:92570359:A:G	69780	47	58	0.305263	2.59751e-08	0.126039	0.0207205	0.000229942
ENSG00000148680	rs114817649:92570549:G:A	69970	47	58	0.305263	2.53743e-08	0.126119	0.0207158	0.000225852
ENSG00000148680	rs117438935:92570857:A:C	70278	48	59	0.310526	1.19165e-07	0.121093	0.0211058	0.000662205
ENSG00000148680	rs141748886:92571019:T:G	70440	45	54	0.284211	1.18442e-08	0.133881	0.021394	0.000134909
ENSG00000148680	rs4933613:92571389:A:G	70810	46	57	0.3	2.07445e-08	0.126765	0.0206689	0.000194845
ENSG00000148680	rs7078682:92572494:C:A	71915	46	57	0.3	1.64104e-08	0.127465	0.0206074	0.000165608
ENSG00000148680	rs7096934:92572748:T:C	72169	44	53	0.278947	8.11334e-09	0.134923	0.0212759	0.000102566
ENSG00000148680	rs7079267:92572858:C:A	72279	47	58	0.305263	7.83145e-08	0.122449	0.020991	0.00050396
ENSG00000148680	rs7079426:92572981:C:A	72402	46	57	0.3	1.46165e-08	0.127792	0.0205744	0.000154628
ENSG00000148680	rs11813240:92573136:A:G	72557	46	57	0.3	1.39499e-08	0.127926	0.0205617	0.000149002
ENSG00000148680	rs58586220:92573318:G:A	72739	44	53	0.278947	7.31442e-09	0.13516	0.0212367	9.49964e-05
ENSG00000148680	rs58460916:92573523:C:T	72944	47	58	0.305263	6.91516e-08	0.122817	0.0209522	0.000464686
ENSG00000148680	rs35449520:92573702:T:A	73123	46	57	0.3	1.24687e-08	0.128225	0.0205274	0.000140187
ENSG00000148680	rs4933195:92574239:T:A	73660	46	57	0.3	1.11744e-08	0.128502	0.0204922	0.000129051
ENSG00000148680	rs60659958:92574841:GT:G	74262	46	57	0.3	1.08809e-08	0.128591	0.020487	0.000126871
ENSG00000148680	rs12263520:92574986:G:T	74407	65	90	0.473684	5.42975e-09	0.119176	0.0185343	7.94246e-05
ENSG00000148680	rs71479062:92574989:C:T	74410	44	53	0.278947	5.67863e-09	0.135844	0.0211589	8.17011e-05
ENSG00000148680	rs28842222:92574994:G:A	74415	44	53	0.278947	5.67863e-09	0.135844	0.0211589	8.17011e-05
ENSG00000148680	rs12415970:92575692:G:A	75113	46	57	0.3	5.54513e-08	0.123419	0.0208763	0.000391484
ENSG00000148680	rs11814840:92576193:A:G	75614	46	57	0.3	5.45036e-08	0.123462	0.0208699	0.000387113
ENSG00000148680	rs11813096:92576390:T:C	75811	46	57	0.3	5.45036e-08	0.123462	0.0208699	0.000387113
ENSG00000148680	rs11186320:92576448:T:C	75869	62	76	0.4	4.52197e-06	0.108222	0.0222129	0.0087694
ENSG00000148680	rs7082401:92576815:T:C	76236	63	77	0.405263	1.28151e-06	0.114373	0.0220801	0.00349739
ENSG00000148680	rs35863839:92577039:T:C	76460	46	56	0.294737	4.12071e-09	0.134174	0.0206722	6.66378e-05
ENSG00000148680	rs11591238:92577907:G:C	77328	30	36	0.189474	1.35412e-07	0.136905	0.0239845	0.00072445
ENSG00000148680	rs34846235:92578238:G:GT	77659	30	36	0.189474	1.35412e-07	0.136905	0.0239845	0.00072445
ENSG00000148680	rs11594126:92579365:T:C	78786	30	36	0.189474	1.39591e-07	0.136677	0.023974	0.000742275
ENSG00000148680	rs12259060:92579949:A:G	79370	63	78	0.410526	3.47597e-07	0.117541	0.0214125	0.00134361
ENSG00000148680	rs1935350:92580594:A:G	80015	30	36	0.189474	1.42082e-07	0.136577	0.0239736	0.000753724
ENSG00000148680	rs7893260:92582614:G:T	82035	26	28	0.147368	3.35324e-05	0.134667	0.030886	0.0342053
ENSG00000148680	rs7893391:92582670:G:A	82091	30	36	0.189474	1.44669e-07	0.136474	0.0239729	0.000760369
ENSG00000148680	rs10881836:92584772:G:A	84193	61	79	0.415789	6.4116e-07	0.109124	0.0204152	0.00210215
ENSG00000148680	rs11186324:92585041:C:T	84462	63	78	0.410526	3.15988e-07	0.117772	0.0213678	0.00127493
ENSG00000148680	rs7906960:92586205:A:G	85626	63	78	0.410526	3.15988e-07	0.117772	0.0213678	0.00127493
ENSG00000148680	rs4086734:92586470:G:A	85891	30	36	0.189474	1.44669e-07	0.136474	0.0239729	0.000760369
ENSG00000148680	rs7087400:92587180:A:G	86601	63	78	0.410526	3.15988e-07	0.117772	0.0213678	0.00127493
ENSG00000148680	rs6583735:92587500:C:A	86921	61	80	0.421053	4.2428e-07	0.109153	0.0200552	0.00155089
ENSG00000148680	rs35674749:92587847:TA:T	87268	30	36	0.189474	1.44669e-07	0.136474	0.0239729	0.000760369
ENSG00000148680	rs7080463:92588681:T:A	88102	63	78	0.410526	3.05262e-07	0.117915	0.0213625	0.00126282
ENSG00000148680	rs9420571:92588799:G:A	88220	61	82	0.431579	4.35231e-07	0.106334	0.0195587	0.00158263
ENSG00000148680	rs10881838:92590233:A:G	89654	63	78	0.410526	3.15988e-07	0.117772	0.0213678	0.00127493
ENSG00000148680	rs12764332:92590506:C:T	89927	30	36	0.189474	1.44669e-07	0.136474	0.0239729	0.000760369
ENSG00000148680	rs7897751:92591236:A:T	90657	30	36	0.189474	1.44669e-07	0.136474	0.0239729	0.000760369
ENSG00000148680	rs35987367:92591992:C:T	91413	63	78	0.410526	3.15988e-07	0.117772	0.0213678	0.00127493
ENSG00000148680	rs34871116:92591998:A:G	91419	50	62	0.326316	1.42964e-08	0.1273	0.0204791	0.000151806
ENSG00000148680	rs66650915:92592468:T:C	91889	63	78	0.410526	3.15988e-07	0.117772	0.0213678	0.00127493
ENSG00000148680	rs10785972:92593800:C:T	93221	64	79	0.415789	5.04599e-07	0.11688	0.0216371	0.0017585
ENSG00000148680	rs12259401:92594121:T:G	93542	63	78	0.410526	3.33546e-07	0.117704	0.0214046	0.00130575
ENSG00000148680	rs1935349:92594343:C:T	93764	30	36	0.189474	1.44669e-07	0.136474	0.0239729	0.000760369
ENSG00000148680	rs1935348:92595973:T:C	95394	30	36	0.189474	1.44669e-07	0.136474	0.0239729	0.000760369
ENSG00000148680	rs7093602:92596818:T:C	96239	30	36	0.189474	1.44669e-07	0.136474	0.0239729	0.000760369
ENSG00000148680	rs2420368:92598007:A:G	97428	30	36	0.189474	1.44669e-07	0.136474	0.0239729	0.000760369
ENSG00000148680	rs11597471:92598767:C:G	98188	63	78	0.410526	3.15988e-07	0.117772	0.0213678	0.00127493
ENSG00000148680	rs11599902	98244	63	78	0.410526	3.15988e-07	0.117772	0.0213678	0.00127493
ENSG00000148680	rs10881839:92601606:A:C	101027	63	78	0.410526	3.15988e-07	0.117772	0.0213678	0.00127493
ENSG00000148680	rs12414389:92601792:C:G	101213	30	36	0.189474	1.44669e-07	0.136474	0.0239729	0.000760369
ENSG00000148680	rs4406742:92602347:G:A	101768	30	36	0.189474	1.44669e-07	0.136474	0.0239729	0.000760369
ENSG00000148680	rs4520504:92602373:T:C	101794	63	78	0.410526	3.15988e-07	0.117772	0.0213678	0.00127493
ENSG00000148680	rs4459202:92602398:G:A	101819	31	37	0.194737	9.37918e-07	0.128021	0.0243629	0.00277985
ENSG00000148680	rs2153779:92602968:G:A	102389	30	36	0.189474	1.44669e-07	0.136474	0.0239729	0.000760369
ENSG00000148680	rs2185706:92603145:G:A	102566	30	36	0.189474	1.44669e-07	0.136474	0.0239729	0.000760369
ENSG00000148680	rs10748554:92603438:G:A	102859	66	82	0.431579	2.48692e-08	0.127869	0.0209877	0.000222866
ENSG00000148680	rs7084468:92604139:G:A	103560	36	42	0.221053	7.56192e-07	0.127456	0.0240207	0.00236212
ENSG00000148680	rs12782860:92604483:C:A	103904	30	36	0.189474	1.50248e-07	0.13691	0.0240863	0.00076914
ENSG00000148680	rs7089533:92605364:C:T	104785	31	37	0.194737	9.37918e-07	0.128021	0.0243629	0.00277985
ENSG00000148680	rs7074715	108727	30	37	0.194737	2.52373e-07	0.130009	0.0233658	0.00110531
ENSG00000148680	rs12414726:92609598:A:G	109019	31	37	0.194737	9.3035e-07	0.128072	0.0243636	0.00276437
ENSG00000148680	rs12259062	109466	70	91	0.478947	7.94369e-07	0.111862	0.0211285	0.0024569
ENSG00000148680	rs12761105:92613417:T:C	112838	30	36	0.189474	1.44669e-07	0.136474	0.0239729	0.000760369
ENSG00000148680	rs71484255:92614310:ACAGAT:A	113731	31	36	0.189474	2.53107e-06	0.12736	0.0253961	0.00583152
ENSG00000148680	rs11313326:92616475:TG:T	115896	30	35	0.184211	4.03007e-07	0.136428	0.0250111	0.00149504
ENSG00000148680	rs71503901:92617659:T:C	117080	30	36	0.189474	1.44669e-07	0.136474	0.0239729	0.000760369
ENSG00000148680	rs7905446:92619161:T:G	118582	70	91	0.478947	1.36538e-06	0.110474	0.0213902	0.00364752
ENSG00000148680	rs12254390:92620148:G:C	119569	70	91	0.478947	1.38553e-06	0.110429	0.0213961	0.00369038
ENSG00000148680	rs6583737:92620789:A:G	120210	70	91	0.478947	1.40606e-06	0.110383	0.021402	0.00373429
ENSG00000148680	rs1935346:92622426:T:C	121847	30	36	0.189474	1.44669e-07	0.136474	0.0239729	0.000760369
ENSG00000148680	rs7083729:92624670:T:C	124091	70	91	0.478947	1.53741e-06	0.110099	0.0214364	0.00400409
ENSG00000148680	rs7084125:92624969:T:G	124390	30	36	0.189474	1.44669e-07	0.136474	0.0239729	0.000760369
ENSG00000148680	rs7100129:92625145:C:T	124566	26	28	0.147368	3.22967e-05	0.134972	0.0308859	0.0333027
ENSG00000148680	rs10785974:92627931:T:C	127352	71	92	0.484211	2.54965e-06	0.108279	0.0215991	0.0058675
ENSG00000148680	rs60419947:92630627:T:TAA	130048	30	36	0.189474	1.44669e-07	0.136474	0.0239729	0.000760369
ENSG00000148680	rs4933199:92631471:T:C	130892	30	36	0.189474	1.44669e-07	0.136474	0.0239729	0.000760369
ENSG00000148680	rs34520335:92632204:AT:A	131625	30	36	0.189474	1.44669e-07	0.136474	0.0239729	0.000760369
ENSG00000148680	rs12246757:92634383:A:G	133804	71	92	0.484211	3.57897e-06	0.106888	0.0216817	0.00744879
ENSG00000148680	rs35569744:92635002:AT:A	134423	30	36	0.189474	1.43858e-07	0.136591	0.023988	0.000760369
ENSG00000148680	rs12411309:92638405:C:T	137826	30	36	0.189474	1.44669e-07	0.136474	0.0239729	0.000760369
ENSG00000148680	rs145367402:92640124:C:CAG	139545	70	91	0.478947	2.34262e-06	0.107659	0.021387	0.00547336
ENSG00000148680	rs11594649:92640181:T:G	139602	30	36	0.189474	1.44669e-07	0.136474	0.0239729	0.000760369
ENSG00000148680	rs35472372:92640584:CT:C	140005	30	36	0.189474	1.44669e-07	0.136474	0.0239729	0.000760369
ENSG00000148680	rs4144423:92643840:T:G	143261	31	37	0.194737	8.24873e-07	0.128847	0.0243781	0.00250588
ENSG00000148680	rs12766523:92644372:G:A	143793	30	36	0.189474	1.44669e-07	0.136474	0.0239729	0.000760369
ENSG00000148680	rs10509612:92645360:G:A	144781	31	37	0.194737	1.20665e-07	0.136792	0.0238541	0.000664934
ENSG00000148680	rs10881844:92648024:T:C	147445	72	93	0.489474	9.87245e-06	0.103571	0.0221484	0.014577
ENSG00000148680	rs11186350:92649368:G:T	148789	71	92	0.484211	3.55616e-06	0.106915	0.0216801	0.00741174
ENSG00000148680	rs11186351:92649784:T:C	149205	72	93	0.489474	9.87245e-06	0.103571	0.0221484	0.014577
ENSG00000148680	rs7101301:92649923:G:A	149344	71	92	0.484211	3.55616e-06	0.106915	0.0216801	0.00741174
ENSG00000148680	rs7896973:92650797:A:G	150218	72	93	0.489474	9.44911e-06	0.103794	0.0221434	0.0140633
ENSG00000148680	rs7909232:92651479:G:A	150900	71	92	0.484211	3.55616e-06	0.106915	0.0216801	0.00741174
ENSG00000148680	rs4933618:92652571:C:T	151992	71	91	0.478947	3.22357e-06	0.108636	0.0219216	0.00692768
ENSG00000148680	rs7900048:92656513:G:A	155934	71	92	0.484211	3.52759e-06	0.106948	0.0216782	0.00736602
ENSG00000148680	rs4933620:92659865:T:C	159286	31	37	0.194737	8.3628e-07	0.1288	0.0243843	0.00253625
ENSG00000148680	rs4568910:92662860:A:G	162281	72	93	0.489474	9.65177e-06	0.103673	0.0221431	0.0143112
ENSG00000148680	rs7089472:92663108:C:T	162529	72	93	0.489474	2.10507e-05	0.101819	0.0227176	0.0248064
ENSG00000148680	rs4522081:92666683:T:A	166104	69	89	0.468421	1.64075e-07	0.120994	0.0213627	0.000817033
ENSG00000148680	rs4933621:92668029:A:G	167450	31	37	0.194737	8.50126e-07	0.128847	0.0244112	0.00257025
ENSG00000148680	rs4933200:92676127:T:C	175548	30	36	0.189474	1.5049e-07	0.136909	0.0240879	0.000769687
ENSG00000226688	rs1268608:97376731:T:C	-136233	56	70	0.368421	9.35674e-06	-0.105078	0.0224055	0.013983
ENSG00000226688	rs535449:97378785:G:A	-134179	55	68	0.357895	4.69102e-05	-0.0984639	0.0230538	0.0425012
ENSG00000226688	rs507017:97380662:G:A	-132302	55	68	0.357895	4.69102e-05	-0.0984639	0.0230538	0.0425012
ENSG00000226688	rs2986401:97382659:C:T	-130305	55	68	0.357895	4.69102e-05	-0.0984639	0.0230538	0.0425012
ENSG00000226688	rs501819:97383926:A:C	-129038	55	68	0.357895	4.69102e-05	-0.0984639	0.0230538	0.0425012
ENSG00000226688	rs3793749:97394628:C:T	-118336	56	70	0.368421	1.15957e-05	-0.104415	0.0225259	0.0163825
ENSG00000226688	rs7069943:97397486:G:A	-115478	55	68	0.357895	5.85299e-05	-0.0976414	0.0231831	0.0493262
ENSG00000226688	rs12244124:97399856:C:T	-113108	56	70	0.368421	1.20859e-05	-0.104267	0.0225453	0.0169073
ENSG00000226688	rs34011550:97399987:AAT:A	-112977	55	68	0.357895	5.96779e-05	-0.0975598	0.0231926	0.0498462
ENSG00000226688	rs10882645:97404364:C:A	-108600	56	70	0.368421	1.24727e-05	-0.104151	0.0225595	0.0172934
ENSG00000226688	rs9663413:97405989:C:T	-106975	56	70	0.368421	1.26055e-05	-0.104111	0.0225641	0.0174308
ENSG00000226688	rs11188416:97409285:G:C	-103679	56	70	0.368421	1.30156e-05	-0.10399	0.0225778	0.0178538
ENSG00000226688	rs7894648:97431369:T:C	-81595	56	70	0.368421	1.29801e-05	-0.103678	0.0225067	0.0178144
ENSG00000226688	rs7920801:97431839:C:T	-81125	56	70	0.368421	1.29801e-05	-0.103678	0.0225067	0.0178144
ENSG00000226688	rs6584013:97439450:G:A	-73514	56	70	0.368421	1.31319e-05	-0.103628	0.0225105	0.0179862
ENSG00000226688	rs1137629:97659578:T:A	146614	56	73	0.384211	3.44965e-05	0.0950647	0.0218406	0.0347869
ENSG00000226688	rs10786240:97666538:C:T	153574	56	73	0.384211	3.56276e-05	0.0947507	0.0218112	0.0356279
ENSG00000226688	rs7906654:97667683:T:G	154719	56	73	0.384211	3.39477e-05	0.095566	0.0219345	0.0344613
ENSG00000166024	rs881990:99859653:T:C	-34735	61	71	0.373684	6.5024e-06	0.0757406	0.0158404	0.0109512
ENSG00000166024	rs4112273:99863227:C:T	-31161	61	71	0.373684	6.5348e-06	0.0755327	0.015801	0.0109817
ENSG00000166024	rs11189489:99863825:A:G	-30563	61	71	0.373684	6.54609e-06	0.07552	0.0157998	0.0109817
ENSG00000166024	rs5787274:99866202:G:GA	-28186	61	71	0.373684	6.55813e-06	0.0754231	0.0157811	0.0109896
ENSG00000166024	rs1334461:99868267:C:T	-26121	61	71	0.373684	6.43247e-06	0.075484	0.0157778	0.0108817
ENSG00000166024	rs987793:99868961:G:A	-25427	61	71	0.373684	6.42894e-06	0.0754829	0.0157771	0.0108798
ENSG00000166024	rs1334465:99876121:G:A	-18267	61	71	0.373684	6.21841e-06	0.0755913	0.0157723	0.0107034
ENSG00000166024	rs7085503:99878013:G:C	-16375	61	71	0.373684	6.39131e-06	0.0755393	0.0157841	0.0108603
ENSG00000166024	rs10786389:99880643:C:T	-13745	61	71	0.373684	6.39131e-06	0.0755393	0.0157841	0.0108603
ENSG00000166024	rs59590401:99882118:GT:G	-12270	62	72	0.378947	1.87302e-05	0.0731895	0.0162203	0.0229005
ENSG00000166024	rs1931665:99882641:C:T	-11747	61	71	0.373684	6.4068e-06	0.0754836	0.0157744	0.0108603
ENSG00000166024	rs4098026:99884547:C:T	-9841	61	71	0.373684	6.40017e-06	0.0754787	0.0157725	0.0108603
ENSG00000166024	rs6584167:99889852:C:T	-4536	61	71	0.373684	6.40017e-06	0.0754787	0.0157725	0.0108603
ENSG00000166024	rs7911699:99890470:G:A	-3918	63	76	0.4	1.43548e-05	0.07021	0.0153272	0.019178
ENSG00000166024	rs7088359:99891010:C:T	-3378	61	71	0.373684	6.36411e-06	0.0755555	0.0157839	0.0108558
ENSG00000166024	rs7072056:99892677:C:T	-1711	61	71	0.373684	6.33956e-06	0.0754837	0.0157657	0.0108274
ENSG00000166024	rs7090206:99892742:T:G	-1646	62	74	0.389474	5.93207e-06	0.0735753	0.015314	0.0103699
ENSG00000166024	rs7072474:99893053:A:G	-1335	61	71	0.373684	6.40905e-06	0.0754694	0.0157717	0.0108603
ENSG00000166024	rs6584168:99893753:G:T	-635	61	71	0.373684	6.36648e-06	0.0754294	0.0157579	0.0108582
ENSG00000166024	rs6584169:99895246:T:C	858	61	71	0.373684	6.3463e-06	0.0753988	0.0157489	0.0108351
ENSG00000166024	rs10786391:99895924:G:A	1536	61	71	0.373684	6.32787e-06	0.0754369	0.0157544	0.010825
ENSG00000166024	rs6584170:99897782:A:G	3394	61	71	0.373684	6.3463e-06	0.0753988	0.0157489	0.0108351
ENSG00000166024	rs6584171:99898133:A:T	3745	61	71	0.373684	6.42769e-06	0.0753487	0.0157489	0.010879
ENSG00000166024	rs7905384:99898268:T:C	3880	61	71	0.373684	6.47664e-06	0.0753765	0.015761	0.0109237
ENSG00000166024	rs7905388:99898281:T:C	3893	61	71	0.373684	6.47664e-06	0.0753765	0.015761	0.0109237
ENSG00000166024	rs10786392:99902568:T:C	8180	61	71	0.373684	6.42769e-06	0.0753487	0.0157489	0.010879
ENSG00000166024	rs10786394:99903678:T:C	9290	61	71	0.373684	6.3463e-06	0.0753988	0.0157489	0.0108351
ENSG00000166024	rs10786395:99903704:C:T	9316	62	74	0.389474	6.03097e-06	0.0733309	0.0152762	0.0104865
ENSG00000166024	rs11189492:99903846:T:G	9458	61	71	0.373684	6.47215e-06	0.0751806	0.0157194	0.0109202
ENSG00000166024	rs10748714:99903921:A:G	9533	61	71	0.373684	6.47215e-06	0.0751806	0.0157194	0.0109202
ENSG00000166024	rs1963749:99904169:C:T	9781	61	71	0.373684	6.47215e-06	0.0751806	0.0157194	0.0109202
ENSG00000166024	rs10883047:99905588:C:A	11200	62	74	0.389474	6.03097e-06	0.0733309	0.0152762	0.0104865
ENSG00000166024	rs10786396:99905825:G:A	11437	61	71	0.373684	6.47215e-06	0.0751806	0.0157194	0.0109202
ENSG00000166024	rs60637116:99905933:C:CTT	11545	61	71	0.373684	6.30068e-06	0.0759508	0.0158582	0.010803
ENSG00000166024	rs7909145:99907914:C:T	13526	61	71	0.373684	6.47215e-06	0.0751806	0.0157194	0.0109202
ENSG00000166024	rs7903850:99912061:G:A	17673	61	71	0.373684	6.52134e-06	0.0751438	0.015718	0.0109663
ENSG00000166024	rs7920201:99912103:T:C	17715	61	71	0.373684	6.88675e-06	0.0752421	0.0157837	0.0113463
ENSG00000166024	rs7083189:99912621:C:T	18233	61	71	0.373684	6.50821e-06	0.0751405	0.0157156	0.0109544
ENSG00000166024	rs7101091:99912687:T:C	18299	61	71	0.373684	6.48583e-06	0.0751565	0.0157161	0.0109324
ENSG00000166024	rs10748715:99914261:C:T	19873	61	71	0.373684	6.39216e-06	0.0756608	0.0158095	0.0108603
ENSG00000166024	rs7894624:99917211:C:T	22823	61	72	0.378947	5.78959e-06	0.0751173	0.0156152	0.0101933
ENSG00000166024	rs7911317:99917316:T:C	22928	61	71	0.373684	6.50468e-06	0.0751084	0.0157085	0.0109512
ENSG00000166024	rs4468282:99918976:A:G	24588	61	71	0.373684	6.50468e-06	0.0751084	0.0157085	0.0109512
ENSG00000166024	rs4317916:99925666:T:C	31278	61	71	0.373684	6.50468e-06	0.0751084	0.0157085	0.0109512
ENSG00000166024	rs7086585:99925879:C:T	31491	61	71	0.373684	6.50468e-06	0.0751084	0.0157085	0.0109512
ENSG00000166024	rs10786399:99926655:C:T	32267	62	72	0.378947	9.69187e-06	0.0743997	0.0158943	0.0143577
ENSG00000166024	rs4919179:99927556:A:G	33168	61	71	0.373684	6.44407e-06	-0.0751478	0.015709	0.0108927
ENSG00000166024	rs9420720:99928198:G:A	33810	61	71	0.373684	6.44407e-06	-0.0751478	0.015709	0.0108927
ENSG00000166024	rs9419844:99929900:A:G	35512	61	71	0.373684	6.44407e-06	-0.0751478	0.015709	0.0108927
ENSG00000166024	rs9420721:99936182:T:C	41794	61	71	0.373684	6.49542e-06	-0.0751178	0.0157093	0.0109427
ENSG00000166024	rs1252921:99937651:T:C	43263	61	71	0.373684	6.49542e-06	-0.0751178	0.0157093	0.0109427
ENSG00000166024	rs1252920:99947771:G:A	53383	61	71	0.373684	6.49542e-06	-0.0751178	0.0157093	0.0109427
ENSG00000166024	rs12780143:99949813:A:G	55425	61	71	0.373684	6.49542e-06	-0.0751178	0.0157093	0.0109427
ENSG00000166024	rs2025626:99952220:A:G	57832	61	71	0.373684	6.49542e-06	-0.0751178	0.0157093	0.0109427
ENSG00000166024	rs7071520:99952534:C:G	58146	63	75	0.394737	1.2612e-05	-0.0716333	0.0155256	0.0174384
ENSG00000166024	rs4919183:99953308:C:T	58920	61	71	0.373684	6.34454e-06	-0.0753335	0.015735	0.0108338
ENSG00000166024	rs66925115:99955350:AC:A	60962	59	69	0.363158	9.1881e-06	-0.0736265	0.0156838	0.0138305
ENSG00000166024	rs4919185:99958168:C:T	63780	61	71	0.373684	6.46963e-06	-0.0751162	0.0157057	0.0109202
ENSG00000166024	rs9420727:99958688:T:C	64300	61	71	0.373684	6.46963e-06	-0.0751162	0.0157057	0.0109202
ENSG00000166024	rs71007381:99958807:A:AT	64419	61	71	0.373684	6.46963e-06	-0.0751162	0.0157057	0.0109202
ENSG00000166024	rs9420728:99960233:C:G	65845	61	71	0.373684	6.46963e-06	-0.0751162	0.0157057	0.0109202
ENSG00000166024	rs10509720:99967115:A:G	72727	61	71	0.373684	6.46963e-06	-0.0751162	0.0157057	0.0109202
ENSG00000166024	rs9419846:99971848:G:A	77460	61	71	0.373684	6.46963e-06	-0.0751162	0.0157057	0.0109202
ENSG00000166024	rs4919188:99974814:C:T	80426	61	71	0.373684	6.46963e-06	-0.0751162	0.0157057	0.0109202
ENSG00000166024	rs12773466:99976611:A:G	82223	61	71	0.373684	6.46963e-06	-0.0751162	0.0157057	0.0109202
ENSG00000166024	rs7078393:99976739:A:G	82351	61	71	0.373684	6.46963e-06	-0.0751162	0.0157057	0.0109202
ENSG00000166024	rs12781480:99983310:T:C	88922	61	71	0.373684	4.37616e-06	-0.0765659	0.0156892	0.00855167
ENSG00000166024	rs1536152:99986581:T:C	92193	61	71	0.373684	6.43633e-06	-0.075118	0.0157018	0.0108866
ENSG00000166024	rs145532263:99989136:G:GT	94748	61	71	0.373684	4.4693e-06	-0.0763414	0.0156599	0.00868994
ENSG00000166024	rs11189521:99992206:T:A	97818	61	71	0.373684	6.30696e-06	-0.0751546	0.0156928	0.0108031
ENSG00000166024	rs1359508:100003785:T:C	109397	61	71	0.373684	6.43633e-06	-0.075118	0.0157018	0.0108866
ENSG00000166024	rs2025625:100004996:G:A	110608	61	70	0.368421	6.8843e-06	-0.0762242	0.0159894	0.0113433
ENSG00000166024	rs3793692	114048	61	71	0.373684	6.43633e-06	-0.075118	0.0157018	0.0108866
ENSG00000166024	rs3750598:100011970:G:A	117582	61	71	0.373684	6.47799e-06	-0.0751025	0.0157039	0.0109237
ENSG00000166024	rs3750599:100013244:A:C	118856	61	71	0.373684	6.57249e-06	-0.0750464	0.015704	0.0110025
ENSG00000166024	rs11189526:100020572:T:G	126184	56	64	0.336842	4.92865e-05	-0.0696287	0.016353	0.0439537
ENSG00000119943	rs10786414:100141027:T:C	-2296	64	89	0.468421	6.63919e-06	0.251228	0.0525993	0.0110713
ENSG00000119943	rs7075655:100142068:A:G	-1255	55	62	0.326316	4.1406e-08	0.375747	0.0628555	0.000310207
ENSG00000119943	rs17109597	-1169	44	49	0.257895	5.78198e-05	0.290442	0.0689065	0.0488827
ENSG00000119943	rs59318566:100142165:TGACAAAAAC:T	-1158	64	89	0.468421	6.64979e-06	0.251147	0.0525868	0.0110841
ENSG00000119943	rs7905265:100143193:C:G	-130	64	89	0.468421	6.61195e-06	0.251105	0.0525621	0.0110415
ENSG00000119943	rs5787280:100144009:T:TGAC	686	64	85	0.447368	6.85552e-07	0.285818	0.0536309	0.00218053
ENSG00000119943	rs2296441:100144782:C:T	1459	55	62	0.326316	2.49421e-08	0.381999	0.0627059	0.00022329
ENSG00000119943	rs10883083:100145913:A:G	2590	64	89	0.468421	8.27771e-06	0.249613	0.0528753	0.0129597
ENSG00000119943	rs59667296:100146313:A:T	2990	64	89	0.468421	6.52253e-06	0.250927	0.0524874	0.0109678
ENSG00000119943	rs2296438:100146895:T:C	3572	61	82	0.431579	1.65977e-05	0.246128	0.0541721	0.0209795
ENSG00000119943	rs4345897	3737	61	82	0.431579	1.66285e-05	0.246027	0.0541557	0.0210094
ENSG00000119943	rs4400721:100147097:G:A	3774	55	64	0.336842	2.35653e-07	0.33916	0.0607815	0.00105146
ENSG00000119943	rs2182170:100147421:A:G	4098	61	82	0.431579	1.66285e-05	0.246027	0.0541557	0.0210094
ENSG00000119943	rs2147897:100147813:G:T	4490	61	82	0.431579	1.66285e-05	0.246027	0.0541557	0.0210094
ENSG00000119943	rs2182169:100148004:T:C	4681	61	80	0.421053	3.62132e-06	0.269005	0.0545983	0.00751953
ENSG00000119943	rs4539242:100148058:T:C	4735	64	89	0.468421	6.74186e-06	0.250178	0.0524216	0.011195
ENSG00000119943	rs2147896:100148176:A:G	4853	64	89	0.468421	6.74186e-06	0.250178	0.0524216	0.011195
ENSG00000119943	rs2147895:100148308:T:G	4985	61	80	0.421053	3.82746e-06	0.268702	0.0546884	0.00782115
ENSG00000119943	rs2182168:100148353:C:G	5030	60	79	0.415789	3.64925e-06	0.268698	0.0545569	0.0075532
ENSG00000119943	rs2274248:100148542:C:T	5219	44	49	0.257895	5.80853e-05	0.290458	0.0689304	0.0490338
ENSG00000119943	rs7916469:100148653:T:C	5330	61	80	0.421053	2.77877e-06	0.272261	0.0545384	0.00623899
ENSG00000119943	rs755126:100148951:G:A	5628	61	80	0.421053	2.77877e-06	0.272261	0.0545384	0.00623899
ENSG00000119943	rs1079179:100149346:T:C	6023	61	80	0.421053	2.82559e-06	0.271961	0.054523	0.00632044
ENSG00000119943	rs2274247:100150148:G:C	6825	61	80	0.421053	2.77877e-06	0.272261	0.0545384	0.00623899
ENSG00000119943	rs10883084:100151189:T:C	7866	61	80	0.421053	2.79498e-06	0.272137	0.0545293	0.00626757
ENSG00000119943	rs10786415:100151266:A:G	7943	64	89	0.468421	6.76782e-06	0.250149	0.0524262	0.0112136
ENSG00000119943	rs942814:100151305:A:G	7982	64	89	0.468421	6.76782e-06	0.250149	0.0524262	0.0112136
ENSG00000119943	rs7097824:100151799:A:T	8476	61	80	0.421053	2.8179e-06	0.272079	0.0545395	0.00631027
ENSG00000119943	rs7082192:100151844:T:C	8521	61	82	0.431579	1.66285e-05	0.246027	0.0541557	0.0210094
ENSG00000119943	rs6584192:100152373:T:G	9050	61	80	0.421053	2.96697e-06	0.272975	0.0548581	0.00655389
ENSG00000119943	rs11189591:100155296:T:G	11973	59	75	0.394737	2.87138e-06	0.279045	0.0559875	0.00639316
ENSG00000119943	rs11189592:100155642:C:A	12319	44	49	0.257895	5.80853e-05	0.290458	0.0689304	0.0490338
ENSG00000119943	rs11598689:100156027:G:T	12704	41	46	0.242105	4.05074e-05	0.296154	0.0687113	0.0384667
ENSG00000119943	rs7072216:100156853:T:C	13530	64	89	0.468421	6.82091e-06	0.250089	0.0524352	0.0112752
ENSG00000119943	rs7914401:100163928:T:C	20605	50	61	0.321053	5.5025e-09	0.352847	0.0548998	7.9704e-05
ENSG00000119943	rs733345:100164215:G:T	20892	50	61	0.321053	5.49222e-09	0.352836	0.0548945	7.96748e-05
ENSG00000119943	rs733346:100164325:A:C	21002	50	61	0.321053	5.49222e-09	0.352836	0.0548945	7.96748e-05
ENSG00000119943	rs7915108:100164441:T:C	21118	47	55	0.289474	7.5179e-09	0.372348	0.0585598	9.65021e-05
ENSG00000119943	rs7901577:100164442:A:G	21119	47	55	0.289474	7.5179e-09	0.372348	0.0585598	9.65021e-05
ENSG00000119943	rs4474372:100164571:C:T	21248	50	61	0.321053	5.40939e-09	0.353422	0.0549571	7.91946e-05
ENSG00000119943	rs4475861:100164989:C:T	21666	52	63	0.331579	1.16002e-08	0.348271	0.055612	0.000132862
ENSG00000119943	rs2147901:100165496:C:A	22173	52	65	0.342105	8.87991e-08	0.321094	0.0553157	0.000548994
ENSG00000119943	rs10732782:100166506:C:A	23183	50	61	0.321053	5.49815e-09	0.3528	0.054891	7.96748e-05
ENSG00000119943	rs7910973:100166732:G:A	23409	50	61	0.321053	5.49815e-09	0.3528	0.054891	7.96748e-05
ENSG00000119943	rs7911036:100167015:A:T	23692	50	61	0.321053	5.50739e-09	0.352814	0.0548963	7.97215e-05
ENSG00000119943	rs10883090:100167236:G:C	23913	50	61	0.321053	5.49815e-09	0.3528	0.054891	7.96748e-05
ENSG00000119943	rs10883091:100167239:C:T	23916	51	63	0.331579	8.39284e-09	0.346964	0.054777	0.000104704
ENSG00000119943	rs10883092:100167276:A:C	23953	51	63	0.331579	9.54704e-09	0.345545	0.0547992	0.000115519
ENSG00000119943	rs11189595:100167322:C:T	23999	39	44	0.231579	5.9705e-06	0.326127	0.0679029	0.0104211
ENSG00000119943	rs12763326	24073	50	61	0.321053	5.49815e-09	0.3528	0.054891	7.96748e-05
ENSG00000119943	rs45523432:100167436:T:C	24113	50	61	0.321053	5.49815e-09	0.3528	0.054891	7.96748e-05
ENSG00000119943	rs12763044:100167451:C:G	24128	50	61	0.321053	5.49815e-09	0.3528	0.054891	7.96748e-05
ENSG00000119943	rs7091709:100167605:G:A	24282	53	69	0.363158	4.53181e-07	0.293296	0.0540424	0.00162087
ENSG00000119943	rs942810:100167860:G:C	24537	61	82	0.431579	3.22181e-06	0.268013	0.0540808	0.00692477
ENSG00000119943	rs942809:100168001:G:A	24678	52	65	0.342105	8.80846e-08	0.321198	0.0553161	0.000545638
ENSG00000119943	rs942808:100168102:C:A	24779	50	61	0.321053	5.49815e-09	0.3528	0.054891	7.96748e-05
ENSG00000119943	rs942807:100168219:G:A	24896	50	61	0.321053	5.49815e-09	0.3528	0.054891	7.96748e-05
ENSG00000119943	rs942806:100168248:G:A	24925	50	61	0.321053	5.49815e-09	0.3528	0.054891	7.96748e-05
ENSG00000119943	rs5787283:100168329:G:GC	25006	50	61	0.321053	5.49815e-09	0.3528	0.054891	7.96748e-05
ENSG00000119943	rs942805:100168372:G:A	25049	50	61	0.321053	5.49815e-09	0.3528	0.054891	7.96748e-05
ENSG00000119943	rs942804:100168499:C:A	25176	50	61	0.321053	5.49059e-09	0.352824	0.0548921	7.96748e-05
ENSG00000119943	rs942803:100168631:G:T	25308	52	65	0.342105	2.37912e-08	0.33021	0.0541107	0.000216325
ENSG00000119943	rs60813721:100169013:A:ACTG	25690	39	44	0.231579	5.9493e-06	0.326167	0.0678988	0.0103925
ENSG00000119943	rs12259939:100169021:T:C	25698	52	65	0.342105	2.40108e-08	0.330109	0.0541125	0.000218206
ENSG00000119943	rs9787550:100169051:C:T	25728	50	61	0.321053	5.51259e-09	0.352851	0.0549038	7.97488e-05
ENSG00000119943	rs7923729	26142	52	65	0.342105	2.42343e-08	0.330007	0.0541141	0.000218487
ENSG00000119943	rs9804285:100169472:C:T	26149	52	65	0.342105	2.45764e-08	0.329982	0.0541378	0.000220937
ENSG00000119943	rs6584197:100169685:G:A	26362	53	67	0.352632	3.71166e-08	0.324499	0.0540596	0.000293039
ENSG00000119943	rs6584198:100169906:G:C	26583	52	65	0.342105	2.42343e-08	0.330007	0.0541141	0.000218487
ENSG00000119943	rs6584199:100169983:A:G	26660	52	65	0.342105	2.42343e-08	0.330007	0.0541141	0.000218487
ENSG00000119943	rs6584200:100170037:A:G	26714	52	65	0.342105	2.42343e-08	0.330007	0.0541141	0.000218487
ENSG00000119943	rs6584201:100170209:T:C	26886	52	65	0.342105	2.42343e-08	0.330007	0.0541141	0.000218487
ENSG00000119943	rs6584202:100170383:G:A	27060	53	67	0.352632	3.71166e-08	0.324499	0.0540596	0.000293039
ENSG00000119943	rs3814140:100170762:C:T	27439	52	65	0.342105	2.42343e-08	0.330007	0.0541141	0.000218487
ENSG00000119943	rs3814141:100171028:G:A	27705	44	51	0.268421	3.48934e-06	0.314533	0.0637205	0.00731393
ENSG00000119943	rs3814142:100171104:C:G	27781	52	65	0.342105	2.36934e-08	0.330347	0.0541249	0.000215608
ENSG00000119943	rs3829853:100171174:A:G	27851	52	65	0.342105	2.42343e-08	0.330007	0.0541141	0.000218487
ENSG00000119943	rs10748728:100171198:C:T	27875	52	65	0.342105	2.42343e-08	0.330007	0.0541141	0.000218487
ENSG00000119943	rs10748729:100171371:G:C	28048	52	65	0.342105	2.42343e-08	0.330007	0.0541141	0.000218487
ENSG00000119943	rs10748730:100171440:C:T	28117	52	65	0.342105	2.42343e-08	0.330007	0.0541141	0.000218487
ENSG00000119943	rs7909131:100171471:A:G	28148	61	82	0.431579	3.35117e-06	0.267177	0.0540178	0.00712616
ENSG00000119943	rs10736129:100171571:A:G	28248	52	65	0.342105	2.42343e-08	0.330007	0.0541141	0.000218487
ENSG00000119943	rs7909822:100172035:A:C	28712	53	67	0.352632	3.71166e-08	0.324499	0.0540596	0.000293039
ENSG00000119943	rs7910014:100172110:C:T	28787	52	65	0.342105	2.42343e-08	0.330007	0.0541141	0.000218487
ENSG00000119943	rs7910247:100172252:C:T	28929	52	65	0.342105	2.42343e-08	0.330007	0.0541141	0.000218487
ENSG00000119943	rs10717289:100172311:GC:G	28988	52	65	0.342105	2.42343e-08	0.330007	0.0541141	0.000218487
ENSG00000119943	rs7913541:100172479:A:G	29156	52	65	0.342105	2.42602e-08	0.330046	0.0541226	0.000218487
ENSG00000119943	rs4258311:100173328:G:A	30005	52	65	0.342105	2.40286e-08	0.330177	0.0541251	0.00021831
ENSG00000119943	rs6584203:100173428:G:A	30105	52	65	0.342105	2.42602e-08	0.330046	0.0541226	0.000218487
ENSG00000119943	rs6584204:100173580:C:G	30257	52	65	0.342105	2.53269e-08	0.329864	0.0541784	0.000225665
ENSG00000119943	rs6584205:100173806:C:T	30483	52	65	0.342105	2.42602e-08	0.330046	0.0541226	0.000218487
ENSG00000119943	rs5787284:100174167:A:AG	30844	52	65	0.342105	2.42436e-08	0.3301	0.0541301	0.000218487
ENSG00000119943	rs3750601:100174561:C:A	31238	52	65	0.342105	2.42436e-08	0.3301	0.0541301	0.000218487
ENSG00000119943	rs2147900:100174721:T:C	31398	52	65	0.342105	2.42436e-08	0.3301	0.0541301	0.000218487
ENSG00000119943	rs2274246:100175060:C:T	31737	52	65	0.342105	2.42602e-08	0.330046	0.0541226	0.000218487
ENSG00000119943	rs2274245:100175082:C:T	31759	52	65	0.342105	2.42602e-08	0.330046	0.0541226	0.000218487
ENSG00000119943	rs2274244:100175218:A:G	31895	52	65	0.342105	2.42343e-08	0.330007	0.0541141	0.000218487
ENSG00000119943	rs2274243:100175267:T:C	31944	52	65	0.342105	2.42602e-08	0.330046	0.0541226	0.000218487
ENSG00000119943	rs8181292:100175477:A:G	32154	53	67	0.352632	3.75989e-08	0.324369	0.0540642	0.000293039
ENSG00000119943	rs3833718:100175529:CA:C	32206	52	65	0.342105	2.42977e-08	0.330012	0.0541201	0.000218604
ENSG00000119943	rs113195335:100175532:A:C	32209	52	65	0.342105	2.42977e-08	0.330012	0.0541201	0.000218604
ENSG00000119943	rs3750603:100175536:A:T	32213	52	65	0.342105	2.42977e-08	0.330012	0.0541201	0.000218604
ENSG00000119943	rs3750604:100175581:G:A	32258	39	44	0.231579	6.0543e-06	0.325664	0.0678557	0.0105156
ENSG00000119943	rs3750605:100175654:C:T	32331	44	51	0.268421	3.54037e-06	0.314032	0.063665	0.00738735
ENSG00000119943	rs1061123:100176997:A:G	33674	60	81	0.426316	2.64317e-06	0.26492	0.0529381	0.00602453
ENSG00000119943	rs1061115	33726	60	81	0.426316	2.92974e-06	0.263088	0.0528383	0.00649221
ENSG00000119943	rs11189600:100179274:C:T	35951	61	79	0.415789	2.93186e-05	0.251628	0.057247	0.0311526
ENSG00000119943	rs10786419:100180940:T:C	37617	63	83	0.436842	5.9407e-06	0.267148	0.0556085	0.0103813
ENSG00000119943	rs2296435:100182285:T:C	38962	39	45	0.236842	1.54937e-05	0.304099	0.0666715	0.0200444
ENSG00000119943	rs2296433:100184062:C:A	40739	39	45	0.236842	1.55167e-05	0.303672	0.0665835	0.0200624
ENSG00000119943	rs2296432:100184063:C:G	40740	39	45	0.236842	1.55167e-05	0.303672	0.0665835	0.0200624
ENSG00000119943	rs7921146:100186601:G:A	43278	52	66	0.347368	3.69544e-06	0.277664	0.0564129	0.00762341
ENSG00000095485	rs12415923:101797945:C:T	-194111	41	53	0.278947	3.99443e-05	0.0562185	0.0130321	0.038112
ENSG00000095485	rs11599088:101804114:C:T	-187942	41	53	0.278947	2.82999e-05	0.0565997	0.0128497	0.0303634
ENSG00000095485	rs12772115:101806523:T:C	-185533	42	55	0.289474	1.39201e-05	0.0571341	0.0124512	0.0187354
ENSG00000095485	rs12247707:101808863:G:A	-183193	42	55	0.289474	1.44662e-05	0.0569509	0.012438	0.019272
ENSG00000095485	rs11593916	-182397	42	56	0.294737	3.37653e-05	0.0539585	0.0123806	0.034359
ENSG00000095485	rs11594585:101811166:C:G	-180890	42	55	0.289474	1.45024e-05	0.0569216	0.0124334	0.0193069
ENSG00000095485	rs11190383:101814956:C:G	-177100	43	56	0.294737	9.40064e-06	0.0584408	0.0124644	0.0140052
ENSG00000095485	rs11818417:101823971:T:C	-168085	40	53	0.278947	3.44781e-06	0.061314	0.012414	0.00727238
ENSG00000095485	rs12776483:101828600:C:A	-163456	45	59	0.310526	1.03386e-05	0.0575984	0.0123482	0.0150482
ENSG00000095485	rs34633631:101828623:G:GT	-163433	45	59	0.310526	1.03386e-05	0.0575984	0.0123482	0.0150482
ENSG00000095485	rs12761969:101832036:G:C	-160020	45	59	0.310526	1.02471e-05	0.057608	0.0123443	0.0149925
ENSG00000095485	rs4475856:101833339:G:T	-158717	45	59	0.310526	1.03377e-05	0.0575819	0.0123446	0.0150482
ENSG00000095485	rs11598979:101833720:C:T	-158336	49	64	0.336842	6.73902e-06	0.0583788	0.0122323	0.0111914
ENSG00000095485	rs12775433:101834092:C:T	-157964	49	64	0.336842	6.79861e-06	0.0583539	0.0122327	0.0112477
ENSG00000095485	rs11599683:101834921:G:A	-157135	45	59	0.310526	1.03535e-05	0.0575635	0.0123417	0.0150674
ENSG00000095485	rs11596211:101840119:T:A	-151937	45	58	0.305263	3.83527e-05	0.0550491	0.0127292	0.0372068
ENSG00000095485	rs2862950:101844785:A:G	-147271	45	59	0.310526	1.05017e-05	0.0574615	0.0123294	0.0152253
ENSG00000095485	rs2862951:101844948:A:C	-147108	45	59	0.310526	1.05017e-05	0.0574615	0.0123294	0.0152253
ENSG00000095485	rs11597870:101847857:T:C	-144199	45	59	0.310526	1.05224e-05	0.057441	0.0123263	0.0152482
ENSG00000095485	rs11596253:101849411:C:A	-142645	45	59	0.310526	1.05098e-05	0.0574511	0.0123276	0.0152351
ENSG00000095485	rs11596837:101850079:C:A	-141977	49	64	0.336842	7.17395e-06	0.0581196	0.0122182	0.011687
ENSG00000095485	rs140872521:101854930:CA:C	-137126	45	59	0.310526	1.05015e-05	0.0574978	0.0123371	0.0152253
ENSG00000095485	rs12765091:101855231:G:C	-136825	49	64	0.336842	7.158e-06	0.058173	0.0122279	0.0116661
ENSG00000095485	rs9888058:101859205:G:A	-132851	55	71	0.373684	5.7659e-05	0.0535691	0.0127068	0.0487848
ENSG00000095485	rs11597390:101861435:G:A	-130621	49	64	0.336842	7.38828e-06	0.0583955	0.0122953	0.0119271
ENSG00000095485	rs11596883:101861622:T:C	-130434	49	64	0.336842	6.51602e-06	0.0587366	0.0122855	0.010959
ENSG00000095485	rs1853700:101862694:T:C	-129362	49	64	0.336842	7.02624e-06	0.0582844	0.0122393	0.0115007
ENSG00000095485	rs1853699:101862791:T:C	-129265	49	64	0.336842	7.02624e-06	0.0582844	0.0122393	0.0115007
ENSG00000095485	rs11595257:101862989:C:T	-129067	49	64	0.336842	7.01986e-06	0.0582928	0.0122405	0.0114974
ENSG00000095485	rs11597561:101863041:T:C	-129015	45	59	0.310526	1.0328e-05	0.0576063	0.0123492	0.0150384
ENSG00000095485	rs7474634:101863410:C:A	-128646	45	59	0.310526	1.0328e-05	0.0576063	0.0123492	0.0150384
ENSG00000095485	rs2862947:101863817:G:C	-128239	49	64	0.336842	6.99676e-06	0.0583043	0.0122408	0.0114695
ENSG00000095485	rs2862948:101864173:A:G	-127883	49	64	0.336842	6.99072e-06	0.0583126	0.012242	0.0114623
ENSG00000095485	rs12773948:101865115:T:A	-126941	45	59	0.310526	1.02808e-05	0.0576328	0.0123518	0.0149925
ENSG00000095485	rs12773244:101865344:G:A	-126712	49	64	0.336842	6.97964e-06	0.0583284	0.0122443	0.0114502
ENSG00000095485	rs11592689:101865516:A:T	-126540	45	59	0.310526	1.0338e-05	0.0576194	0.0123527	0.0150482
ENSG00000095485	rs12780510:101865881:T:C	-126175	49	64	0.336842	7.05549e-06	0.0583111	0.0122477	0.0115353
ENSG00000095485	rs12780514:101865884:T:C	-126172	49	64	0.336842	7.05549e-06	0.0583111	0.0122477	0.0115353
ENSG00000095485	rs12779818:101866118:G:A	-125938	49	64	0.336842	7.05549e-06	0.0583111	0.0122477	0.0115353
ENSG00000095485	rs34720372:101866817:CG:C	-125239	45	59	0.310526	1.035e-05	0.0576424	0.0123584	0.0150629
ENSG00000095485	rs12776318:101868677:T:G	-123379	45	59	0.310526	9.50048e-06	0.0578429	0.0123439	0.0141219
ENSG00000095485	rs11190393:101869988:C:T	-122068	51	66	0.347368	9.24902e-06	0.0582286	0.0124082	0.0138792
ENSG00000095485	rs67352959:101870552:TTA:T	-121504	45	60	0.315789	1.89469e-05	0.0552527	0.0122532	0.0230768
ENSG00000095485	rs12764798:101870936:C:T	-121120	53	69	0.363158	1.93134e-05	0.0560107	0.012435	0.0234172
ENSG00000095485	rs12783521:101871748:C:A	-120308	45	60	0.315789	1.92358e-05	0.0552172	0.0122559	0.0233496
ENSG00000095485	rs12765808:101872687:A:C	-119369	45	60	0.315789	1.91845e-05	0.0552342	0.0122578	0.0232989
ENSG00000095485	rs12780035:101874844:C:T	-117212	45	60	0.315789	1.93302e-05	0.0552162	0.0122592	0.0234327
ENSG00000095485	rs7474935:101875936:G:C	-116120	45	60	0.315789	1.93463e-05	0.0552197	0.0122605	0.0234454
ENSG00000095485	rs11592631:101878219:G:A	-113837	45	60	0.315789	2.04206e-05	0.0551644	0.0122865	0.0243416
ENSG00000095485	rs138307399:101885270:GGAGA:G	-106786	49	65	0.342105	1.78114e-05	0.0549572	0.0121446	0.0221023
ENSG00000095485	rs11598495:101889417:T:C	-102639	49	65	0.342105	1.82519e-05	0.0548688	0.012142	0.0224887
ENSG00000095485	rs1324693:101890617:A:G	-101439	49	65	0.342105	1.82266e-05	0.0548795	0.0121434	0.0224665
ENSG00000095485	rs12781812:101891222:G:T	-100834	49	65	0.342105	1.82266e-05	0.0548795	0.0121434	0.0224665
ENSG00000095485	rs55696319:101895895:T:TA	-96161	51	66	0.347368	3.11444e-05	0.0554263	0.0126556	0.0324386
ENSG00000095485	rs12775908:101898598:T:C	-93458	52	68	0.357895	4.46053e-05	0.0532588	0.0124306	0.0411294
ENSG00000095485	rs148631880:101904149:A:ACGTG	-87907	52	65	0.342105	2.93452e-06	0.0631579	0.0126856	0.00649986
ENSG00000095485	rs35614792:101934235:C:T	-57821	54	70	0.368421	2.50378e-06	0.0609299	0.0121433	0.00577607
ENSG00000095485	rs11597086:101953705:A:C	-38351	54	71	0.373684	6.04532e-06	0.0578983	0.0120628	0.0105066
ENSG00000095485	rs1327578:101967410:G:A	-24646	54	71	0.373684	6.22829e-06	0.0578054	0.0120622	0.0107135
ENSG00000095485	rs6584351:101970997:A:G	-21059	62	81	0.426316	2.45139e-05	0.0556147	0.0125193	0.0274809
ENSG00000095485	rs11591741:101976501:G:C	-15555	55	72	0.378947	2.56407e-06	0.0601868	0.0120091	0.00589602
ENSG00000095485	rs17882431:101981153:C:T	-10903	55	72	0.378947	2.59454e-06	0.0601539	0.0120094	0.00594249
ENSG00000095485	rs17882802:101983413:G:A	-8643	55	72	0.378947	2.59454e-06	0.0601539	0.0120094	0.00594249
ENSG00000095485	rs34027394:101983816:G:A	-8240	55	72	0.378947	2.59454e-06	0.0601539	0.0120094	0.00594249
ENSG00000095485	rs17885645:101987467:T:C	-4589	54	71	0.373684	5.92541e-06	0.0578828	0.012047	0.0103588
ENSG00000095485	rs67649405:101993561:CAG:C	1505	54	71	0.373684	6.02293e-06	0.0578295	0.0120462	0.0104762
ENSG00000095485	rs11596950:101996360:C:T	4304	54	71	0.373684	6.02293e-06	0.0578295	0.0120462	0.0104762
ENSG00000095485	rs3904036:101998414:T:C	6358	54	71	0.373684	6.02293e-06	0.0578295	0.0120462	0.0104762
ENSG00000095485	rs17729876:101999746:G:A	7690	54	71	0.373684	6.36343e-06	0.0577341	0.0120609	0.0108557
ENSG00000095485	rs17668255:102000701:C:T	8645	54	71	0.373684	6.36343e-06	0.0577341	0.0120609	0.0108557
ENSG00000095485	rs17668357:102003906:G:C	11850	54	71	0.373684	6.38522e-06	0.0577287	0.0120619	0.0108603
ENSG00000095485	rs34762508:102024258:C:T	32202	54	71	0.373684	6.40276e-06	0.0577193	0.0120617	0.0108603
ENSG00000095485	rs2039015:102026559:G:C	34503	54	71	0.373684	6.40276e-06	0.0577193	0.0120617	0.0108603
ENSG00000095485	rs12784396	35351	54	71	0.373684	6.45183e-06	0.0576869	0.0120597	0.0109009
ENSG00000095485	rs112468457:102036074:G:A	44018	64	82	0.431579	1.16128e-05	0.0594348	0.0128232	0.0163965
ENSG00000095485	rs61871341:102037393:A:G	45337	66	83	0.436842	4.97786e-05	0.0567544	0.0133377	0.0442563
ENSG00000095485	rs34955138:102039187:T:G	47131	54	71	0.373684	6.3515e-06	0.0577883	0.012071	0.0108404
ENSG00000162688	rs12038010:100278033:C:T	-37608	44	53	0.278947	5.66463e-05	0.0852338	0.020195	0.0481893
ENSG00000162688	rs12031617:100278376:G:A	-37265	44	53	0.278947	5.58597e-05	0.0852795	0.0201879	0.0477639
ENSG00000162688	rs12028384:100278490:A:G	-37151	44	53	0.278947	5.58597e-05	0.0852795	0.0201879	0.0477639
ENSG00000162688	rs7418415:100279441:T:C	-36200	44	53	0.278947	5.58597e-05	0.0852795	0.0201879	0.0477639
ENSG00000162688	rs6663234	-35205	44	53	0.278947	5.58597e-05	0.0852795	0.0201879	0.0477639
ENSG00000162688	rs56085484:100281679:C:A	-33962	44	53	0.278947	5.60581e-05	0.0852724	0.0201907	0.0478796
ENSG00000162688	rs35544658:100282550:CA:C	-33091	52	63	0.331579	5.87018e-05	-0.0833557	0.019795	0.0494394
ENSG00000162688	rs11399932:100283505:T:TG	-32136	52	62	0.326316	4.5784e-05	-0.0860765	0.0201229	0.041819
ENSG00000162688	rs34896283:100285168:T:C	-30473	44	53	0.278947	5.62595e-05	0.0852649	0.0201936	0.0479867
ENSG00000162688	rs6669386:100285446:A:G	-30195	53	63	0.331579	4.16358e-05	-0.0868237	0.0201783	0.0391165
ENSG00000162688	rs6657345:100286036:C:T	-29605	53	63	0.331579	4.16358e-05	-0.0868237	0.0201783	0.0391165
ENSG00000162688	rs3920022:100286552:A:T	-29089	46	56	0.294737	3.8574e-05	0.085369	0.0197472	0.0372835
ENSG00000162688	rs11166350:100286952:G:A	-28689	53	63	0.331579	4.181e-05	-0.0868116	0.0201807	0.0392314
ENSG00000162688	1:100286977:AAAAAAAAAAAG:A	-28664	43	52	0.273684	4.70962e-05	0.0861921	0.0201855	0.0426065
ENSG00000162688	rs12128247:100287205:T:G	-28436	44	53	0.278947	5.64643e-05	0.0852569	0.0201963	0.0480978
ENSG00000162688	rs75236532:100288393:AAAG:A	-27248	46	56	0.294737	3.86098e-05	0.085364	0.0197471	0.0373055
ENSG00000162688	rs1610198:100288559:C:G	-27082	46	56	0.294737	3.86098e-05	0.085364	0.0197471	0.0373055
ENSG00000162688	rs7367980:100288861:C:A	-26780	44	53	0.278947	5.66723e-05	0.0852485	0.0201991	0.048203
ENSG00000162688	rs7418103:100288923:C:T	-26718	53	63	0.331579	3.54659e-05	-0.0880826	0.0202706	0.0355036
ENSG00000162688	rs72725934:100295979:C:T	-19662	46	56	0.294737	4.15966e-05	0.0851576	0.0197899	0.0390902
ENSG00000162688	rs11166353:100297498:C:T	-18143	46	56	0.294737	4.50806e-05	0.0848644	0.0198204	0.0414525
ENSG00000162688	rs12136335:100300424:T:C	-15217	42	51	0.268421	5.53443e-05	0.0852898	0.0201784	0.0474609
ENSG00000162688	rs11166355:100301128:T:G	-14513	40	48	0.252632	5.41412e-05	0.0874313	0.0206562	0.0467814
ENSG00000162688	rs11166356:100301394:G:T	-14247	40	48	0.252632	5.41412e-05	0.0874313	0.0206562	0.0467814
ENSG00000162688	rs11166357:100302182:G:A	-13459	40	48	0.252632	5.45346e-05	0.0873903	0.020656	0.047004
ENSG00000162688	rs6694354:100302872:T:C	-12769	40	48	0.252632	5.45346e-05	0.0873903	0.020656	0.047004
ENSG00000162688	rs10875271:100303030:C:A	-12611	40	48	0.252632	5.45346e-05	0.0873903	0.020656	0.047004
ENSG00000162688	rs11166358:100305320:T:C	-10321	40	48	0.252632	5.49331e-05	0.0873489	0.0206558	0.047219
ENSG00000162688	rs573196:100307514:T:A	-8127	40	48	0.252632	5.53564e-05	0.0872943	0.0206529	0.0474677
ENSG00000162688	rs520644:100309252:T:C	-6389	40	48	0.252632	5.53564e-05	0.0872943	0.0206529	0.0474677
ENSG00000162688	rs555472:100310736:C:G	-4905	40	48	0.252632	5.57655e-05	0.0872521	0.0206526	0.047712
ENSG00000162688	rs501014:100312175:G:A	-3466	40	48	0.252632	5.55017e-05	0.0872638	0.0206492	0.0475553
ENSG00000162688	rs663848:100316765:C:T	1124	40	48	0.252632	5.86623e-05	0.086903	0.0206365	0.0494134
ENSG00000162688	rs492032:100326021:T:C	10380	41	49	0.257895	5.34039e-05	0.086798	0.0204888	0.0463436
ENSG00000162688	rs494626:100326258:T:C	10617	42	51	0.268421	4.43039e-05	-0.0860893	0.0200848	0.0409087
ENSG00000162688	rs494740:100326301:C:T	10660	42	51	0.268421	4.43039e-05	-0.0860893	0.0200848	0.0409087
ENSG00000162688	rs578793:100328542:G:A	12901	42	51	0.268421	4.43039e-05	-0.0860893	0.0200848	0.0409087
ENSG00000162688	rs672069:100329491:C:T	13850	42	51	0.268421	4.43039e-05	-0.0860893	0.0200848	0.0409087
ENSG00000162688	rs535461:100329889:G:C	14248	43	52	0.273684	5.79631e-05	-0.084406	0.0200282	0.0489705
ENSG00000162688	rs656572:100330666:C:A	15025	42	51	0.268421	4.43039e-05	-0.0860893	0.0200848	0.0409087
ENSG00000162688	rs628842:100332261:G:A	16620	30	35	0.184211	4.64609e-06	0.110038	0.0226169	0.00895634
ENSG00000162688	rs569488:100334848:C:T	19207	42	51	0.268421	4.44489e-05	-0.0861377	0.0201001	0.0410162
ENSG00000162688	rs2230306:100336361:C:T	20720	40	48	0.252632	5.9162e-05	0.0868973	0.0206463	0.0496678
ENSG00000162688	rs6577141:100338055:A:G	22414	42	51	0.268421	3.23753e-05	-0.0884157	0.0202352	0.0333711
ENSG00000162688	rs6676595:100338335:A:G	22694	40	48	0.252632	4.43815e-05	0.0891125	0.0207923	0.0409651
ENSG00000162688	rs2814038:100338506:T:G	22865	42	51	0.268421	3.2e-05	-0.088505	0.0202414	0.0331037
ENSG00000162688	rs618539:100338873:T:G	23232	42	51	0.268421	3.16679e-05	-0.0886635	0.020265	0.032843
ENSG00000162688	rs619445:100339061:A:G	23420	40	48	0.252632	5.88723e-05	0.08822	0.020954	0.0495268
ENSG00000162688	rs631797:100339510:G:A	23869	43	52	0.273684	3.08787e-05	-0.0892818	0.0203754	0.0322461
ENSG00000162688	rs512237:100339659:G:T	24018	44	53	0.278947	5.22436e-05	-0.087147	0.0205426	0.0457421
ENSG00000162688	rs632699:100339709:C:T	24068	41	49	0.257895	4.23896e-05	0.0902896	0.0210071	0.0396166
ENSG00000156875	rs61811154:100363703:T:C	-139951	55	66	0.347368	4.63176e-05	0.0515195	0.0120529	0.0421274
ENSG00000156875	rs6703159	-98189	41	49	0.257895	4.63476e-05	0.0524941	0.0122814	0.0421435
ENSG00000156875	rs2050520:100407721:T:C	-95933	42	51	0.268421	3.92407e-05	0.0517597	0.0119854	0.0376797
ENSG00000156875	rs4908037:100408294:A:G	-95360	41	49	0.257895	4.72523e-05	0.0525251	0.0123035	0.0427104
ENSG00000156875	rs1571351:100414740:C:T	-88914	42	51	0.268421	3.74445e-05	0.0519721	0.0120001	0.0367937
ENSG00000134202	rs10776699:110263086:C:A	-13469	59	74	0.389474	2.02239e-06	0.446584	0.0880902	0.00487483
ENSG00000134202	rs11101994:110270093:A:C	-6462	60	74	0.389474	4.2409e-06	0.435265	0.0890486	0.00835616
ENSG00000134202	rs4540683:110270908:T:G	-5647	60	74	0.389474	4.08611e-06	0.435974	0.0890259	0.00818356
ENSG00000134202	rs4970736:110272645:C:T	-3910	60	75	0.394737	2.71766e-06	0.437169	0.0874769	0.00614377
ENSG00000134202	rs1537236:110278972:C:T	2417	67	91	0.478947	4.24597e-05	0.362909	0.0844442	0.0396637
ENSG00000134202	rs5776997:110279053:GT:G	2498	61	76	0.4	8.68052e-07	0.455991	0.0864731	0.00261473
ENSG00000134202	rs1332018:110282972:G:T	6417	61	77	0.405263	1.09172e-06	0.451769	0.086572	0.0031272
ENSG00000134202	rs4970777	7230	61	77	0.405263	2.85243e-06	0.430715	0.0863905	0.00637339
ENSG00000168679	rs1879093:110861522:G:A	-43949	48	59	0.310526	5.04816e-05	-0.101814	0.0239481	0.0446691
ENSG00000168679	rs4839325:110861635:T:C	-43836	48	59	0.310526	5.04816e-05	-0.101814	0.0239481	0.0446691
ENSG00000168679	rs7526729:111087058:A:G	181587	48	59	0.310526	4.31591e-05	-0.102698	0.0239208	0.0401622
ENSG00000162777	rs2209457:111732711:G:A	2914	47	55	0.289474	3.72707e-07	-0.134559	0.0245858	0.00141947
ENSG00000162777	rs10857859:111733724:G:C	3927	47	55	0.289474	4.05376e-07	-0.133901	0.024554	0.00150236
ENSG00000162777	rs2282248:111736594:C:T	6797	47	55	0.289474	3.90724e-07	-0.133792	0.0244952	0.00146516
ENSG00000162777	rs9970286	7601	47	55	0.289474	3.82285e-07	-0.133611	0.0244392	0.00144532
ENSG00000152404	rs35871855:107071834:C:CA	-125238	61	76	0.4	1.34881e-05	0.093798	0.0204054	0.018329
ENSG00000152404	rs11608075:107073286:A:G	-123786	61	76	0.4	1.34024e-05	0.0937534	0.0203885	0.0182637
ENSG00000152404	rs4347355:107075997:A:G	-121075	60	74	0.389474	5.64449e-06	0.0982613	0.0203994	0.0100502
ENSG00000152404	rs1490938:107078998:C:T	-118074	61	76	0.4	1.34913e-05	0.0935699	0.0203561	0.0183308
ENSG00000152404	rs7951348:107081841:C:T	-115231	60	74	0.389474	5.70014e-06	0.0980627	0.0203685	0.0101004
ENSG00000152404	rs7925132:107085318:T:C	-111754	61	76	0.4	1.35743e-05	0.0933806	0.0203218	0.0184114
ENSG00000152404	rs7117780:107086123:G:A	-110949	61	75	0.394737	1.44468e-05	0.0946734	0.020675	0.0192524
ENSG00000152404	rs1907400:107088692:C:T	-108380	60	75	0.394737	5.46418e-06	0.0964407	0.0199878	0.0098529
ENSG00000152404	rs35734258:107091068:TC:T	-106004	60	75	0.394737	1.74212e-06	0.101036	0.0197883	0.00435342
ENSG00000152404	rs142065594:107091429:T:TTG	-105643	59	74	0.389474	5.88771e-06	0.0959086	0.0199546	0.0103161
ENSG00000152404	rs4753788:107091855:A:T	-105217	59	73	0.384211	6.07746e-06	0.0973053	0.0202787	0.0105357
ENSG00000152404	rs4754196:107096777:A:G	-100295	58	72	0.378947	4.9538e-06	0.0970378	0.0200103	0.0093222
ENSG00000152404	rs11824931:107134501:G:A	-62571	40	50	0.263158	3.00809e-05	-0.0927809	0.0211407	0.0316541
ENSG00000152404	rs7931436:107137112:C:T	-59960	65	88	0.463158	4.25089e-06	0.0910212	0.0186238	0.0083715
ENSG00000152404	rs55982480:107137727:GAA:G	-59345	65	88	0.463158	4.27915e-06	0.0909442	0.0186143	0.00840632
ENSG00000152404	rs1388168:107137917:G:A	-59155	65	88	0.463158	4.27915e-06	0.0909442	0.0186143	0.00840632
ENSG00000152404	rs4754205:107138076:A:G	-58996	49	66	0.347368	5.4674e-05	-0.079462	0.0187851	0.0470718
ENSG00000152404	rs4754207:107138470:G:A	-58602	49	66	0.347368	5.46742e-05	-0.0794675	0.0187864	0.0470718
ENSG00000152404	rs6588957:107138482:A:G	-58590	49	66	0.347368	5.46742e-05	-0.0794675	0.0187864	0.0470718
ENSG00000152404	rs10890685:107139067:A:G	-58005	49	66	0.347368	5.4674e-05	-0.079462	0.0187851	0.0470718
ENSG00000152404	rs10890686:107139068:C:T	-58004	49	66	0.347368	5.4674e-05	-0.079462	0.0187851	0.0470718
ENSG00000152404	rs10890687:107139369:C:T	-57703	49	66	0.347368	5.4674e-05	-0.079462	0.0187851	0.0470718
ENSG00000152404	rs12224337:107140077:G:A	-56995	66	91	0.478947	3.87937e-05	0.0811334	0.018774	0.0374334
ENSG00000152404	rs630693:107197606:G:C	534	42	53	0.278947	1.2186e-05	-0.0936839	0.0202662	0.0170175
ENSG00000152404	rs12363600:107197869:A:G	797	31	31	0.163158	5.32812e-05	-0.129055	0.0304591	0.0462629
ENSG00000152404	rs34443916:107209136:A:T	12064	31	31	0.163158	4.47116e-05	-0.130719	0.0305144	0.041207
ENSG00000152404	rs143047537:107215961:GTTAC:G	18889	40	44	0.231579	4.8131e-06	-0.117205	0.0241333	0.00915941
ENSG00000152404	rs7129866:107220429:T:C	23357	31	31	0.163158	5.32812e-05	-0.129055	0.0304591	0.0462629
ENSG00000152404	rs68000908:107229365:G:A	32293	31	31	0.163158	5.32812e-05	-0.129055	0.0304591	0.0462629
ENSG00000152404	rs34661012:107232338:G:A	35266	31	31	0.163158	5.32812e-05	-0.129055	0.0304591	0.0462629
ENSG00000152404	11:107233518:C:A	36446	31	31	0.163158	5.26545e-05	-0.129178	0.0304653	0.0460134
ENSG00000152404	rs57736894:107248847:G:T	51775	31	31	0.163158	5.32812e-05	-0.129055	0.0304591	0.0462629
ENSG00000152404	rs34938694:107252715:C:T	55643	31	31	0.163158	5.32812e-05	-0.129055	0.0304591	0.0462629
ENSG00000152404	rs34129089:107256395:T:C	59323	31	31	0.163158	5.28031e-05	-0.129176	0.0304703	0.0460514
ENSG00000152404	rs12365270:107259328:G:A	62256	31	31	0.163158	5.32812e-05	-0.129055	0.0304591	0.0462629
ENSG00000152404	rs518062:107267623:A:C	70551	33	33	0.173684	2.36147e-05	-0.131984	0.0296456	0.0268009
ENSG00000152404	rs67428239:107291364:T:C	94292	31	31	0.163158	5.69415e-05	-0.128894	0.0305498	0.0483682
ENSG00000152404	rs11212238:107311484:A:T	114412	31	31	0.163158	5.30475e-05	-0.130084	0.0306935	0.0461585
ENSG00000152404	rs568546:107321156:C:T	124084	66	84	0.442105	6.41797e-07	-0.104264	0.0195069	0.00210404
ENSG00000137760	rs1532820:107798952:G:A	425499	50	62	0.326316	1.23262e-05	0.0937123	0.0202852	0.0171511
ENSG00000178202	rs74822968:108369173:G:A	26340	30	35	0.184211	2.28678e-09	-0.26333	0.0397835	4.17414e-05
ENSG00000178202	rs11212682:108373484:G:T	30651	37	43	0.226316	1.23938e-06	-0.207644	0.040024	0.00341449
ENSG00000178202	rs12362341:108375966:A:G	33133	42	50	0.263158	2.96795e-05	-0.17181	0.0391164	0.0313833
ENSG00000178202	rs4643041:108378207:T:G	35374	35	40	0.210526	5.13456e-08	-0.238188	0.0401712	0.000371242
ENSG00000178202	rs3741060:108379981:A:G	37148	28	30	0.157895	2.97579e-08	-0.281238	0.0464679	0.000252129
ENSG00000178202	rs10749920	40843	42	51	0.268421	2.10283e-05	-0.170978	0.0381456	0.0247978
ENSG00000178202	rs140472852:108386188:A:ATGGATTGGAGCAATATATGTAATTAAAAGTGC	43355	42	50	0.263158	2.97554e-05	-0.171691	0.0390955	0.0314365
ENSG00000178202	rs4754325:108387409:C:T	44576	28	30	0.157895	3.03892e-08	-0.281121	0.0464848	0.000255954
ENSG00000178202	rs11212689:108390469:T:C	47636	42	50	0.263158	2.97032e-05	-0.171706	0.0390947	0.0314007
ENSG00000178202	rs11212691:108391085:C:G	48252	42	50	0.263158	2.97032e-05	-0.171706	0.0390947	0.0314007
ENSG00000178202	rs149638624:108391281:T:TTTTATTTA	48448	42	50	0.263158	2.97032e-05	-0.171706	0.0390947	0.0314007
ENSG00000178202	rs10890851:108391634:T:G	48801	42	50	0.263158	2.96816e-05	-0.171732	0.0390989	0.0313833
ENSG00000178202	rs4753844:108393565:T:G	50732	42	50	0.263158	3.01418e-05	-0.171622	0.0391099	0.0316918
ENSG00000178202	rs11350946:108393862:TA:T	51029	28	30	0.157895	3.04666e-08	-0.281214	0.0465045	0.000256195
ENSG00000178202	rs11824250:108395594:G:A	52761	38	43	0.226316	1.78735e-07	-0.228966	0.0405676	0.00086385
ENSG00000178202	rs7118229:108395634:C:T	52801	42	49	0.257895	8.20717e-06	-0.186889	0.0395703	0.0128867
ENSG00000178202	rs10789666:108397460:A:G	54627	42	50	0.263158	3.06771e-05	-0.17149	0.0391211	0.0320917
ENSG00000178202	rs10890852:108397482:C:G	54649	42	49	0.257895	8.36819e-06	-0.186752	0.0395826	0.0130449
ENSG00000178202	rs10890853:108397640:G:A	54807	28	30	0.157895	3.10912e-08	-0.280874	0.0464834	0.000260269
ENSG00000178202	rs2155437:108412898:G:C	70065	28	30	0.157895	2.01923e-07	-0.267279	0.047594	0.000933156
ENSG00000178202	rs10890858:108413853:C:T	71020	28	30	0.157895	2.06343e-07	-0.267032	0.0475925	0.000950113
ENSG00000178202	rs17092330:108417468:A:G	74635	29	31	0.163158	2.80974e-07	-0.263629	0.0475944	0.00119341
ENSG00000178202	rs17092334:108417492:T:C	74659	29	31	0.163158	2.80974e-07	-0.263629	0.0475944	0.00119341
ENSG00000178202	rs1940219:108430554:A:G	87721	28	30	0.157895	4.36516e-07	-0.260605	0.047941	0.00158662
ENSG00000178202	rs4533001:108432472:A:G	89639	29	31	0.163158	1.15402e-06	-0.250191	0.0480665	0.00325115
ENSG00000178202	rs4442514:108432872:C:T	90039	29	31	0.163158	1.64322e-06	-0.246176	0.0480815	0.0041411
ENSG00000178202	rs11599962:108434421:T:C	91588	29	31	0.163158	1.77653e-06	-0.246307	0.0482853	0.00441905
ENSG00000170209	rs7123797:113262571:A:G	4057	59	76	0.4	2.05302e-05	-0.268336	0.0597836	0.024442
ENSG00000170209	rs12360992:113262900:A:C	4386	59	78	0.410526	5.99658e-05	-0.249764	0.0593939	0.0499942
ENSG00000170209	rs17115439	5758	59	75	0.394737	2.30517e-05	-0.269954	0.0605503	0.0263412
ENSG00000170209	rs11214596:113264511:C:G	5997	58	78	0.410526	4.65134e-05	-0.247453	0.0579065	0.0422369
ENSG00000170209	rs4938015:113264644:T:C	6130	58	75	0.394737	2.71461e-05	-0.262362	0.0594162	0.0294473
ENSG00000170209	rs10891546:113265292:T:C	6778	58	75	0.394737	2.55443e-05	-0.263127	0.0593756	0.0282734
ENSG00000170209	rs10891549	19933	58	80	0.421053	1.77849e-05	-0.251056	0.0554745	0.0220786
ENSG00000170209	rs1554929:113278764:C:T	20250	57	79	0.415789	3.6519e-05	-0.240984	0.0555569	0.0362214
ENSG00000170209	rs11214603:113279922:G:A	21408	57	79	0.415789	3.71024e-05	-0.240824	0.055574	0.0365686
ENSG00000170209	rs6277:113283459:G:A	24945	58	80	0.421053	1.99131e-05	-0.251516	0.0559376	0.023917
ENSG00000170209	rs12363125:113285916:C:T	27402	66	92	0.484211	1.05447e-05	-0.26146	0.0561133	0.0152686
ENSG00000170209	rs2734838:113286501:A:G	27987	66	92	0.484211	1.05447e-05	-0.26146	0.0561133	0.0152686
ENSG00000170209	rs1107162:113289037:G:A	30523	66	92	0.484211	1.08424e-05	-0.261179	0.0561382	0.0155549
ENSG00000170209	rs2734835:113291343:T:G	32829	66	92	0.484211	1.11876e-05	-0.260998	0.0561957	0.0159351
ENSG00000170209	rs1800498:113291588:G:A	33074	66	92	0.484211	1.13803e-05	-0.260841	0.0562145	0.016147
ENSG00000170209	rs2234690:113291748:T:A	33234	66	92	0.484211	1.13803e-05	-0.260841	0.0562145	0.016147
ENSG00000170209	rs2587548:113292212:G:C	33698	66	92	0.484211	1.13803e-05	-0.260841	0.0562145	0.016147
ENSG00000170209	rs34554234:113292326:GC:G	33812	66	92	0.484211	1.13851e-05	-0.260838	0.056215	0.0161518
ENSG00000170209	rs2734833:113292920:G:A	34406	67	92	0.484211	3.22397e-06	-0.280739	0.0566508	0.00692811
ENSG00000170209	rs2734832:113293501:A:G	34987	66	92	0.484211	1.22349e-05	-0.260398	0.0563432	0.0170668
ENSG00000170209	rs2734831:113293596:T:G	35082	66	92	0.484211	1.22349e-05	-0.260398	0.0563432	0.0170668
ENSG00000170209	rs5794864:113294005:AT:A	35491	66	92	0.484211	1.22076e-05	-0.26047	0.0563519	0.0170385
ENSG00000170209	rs11608185:113294976:T:C	36462	66	92	0.484211	1.22349e-05	-0.260398	0.0563432	0.0170668
ENSG00000170209	rs1076563:113295909:A:C	37395	66	92	0.484211	1.26553e-05	-0.260131	0.0563908	0.01748
ENSG00000170209	rs1116313:113296107:A:G	37593	66	92	0.484211	1.26553e-05	-0.260131	0.0563908	0.01748
ENSG00000170209	rs12798900:113298996:G:T	40482	66	92	0.484211	1.30959e-05	-0.260274	0.0565289	0.0179477
ENSG00000170209	rs11214605:113300601:C:T	42087	66	92	0.484211	1.41414e-05	-0.259791	0.0566661	0.0189675
ENSG00000170209	rs12800853:113302514:C:T	44000	66	92	0.484211	1.35247e-05	-0.260352	0.0566472	0.0183594
ENSG00000170209	rs11608109:113303448:G:C	44934	66	92	0.484211	1.5649e-05	-0.259186	0.0568566	0.0201712
ENSG00000170209	rs7122246:113304457:G:A	45943	66	92	0.484211	1.63214e-05	-0.258937	0.0569371	0.0207619
ENSG00000182985	rs12806083:115461667:G:C	421728	48	54	0.284211	3.97905e-05	0.815697	0.189043	0.0380173
ENSG00000137656	rs497744:117368158:G:T	749271	20	22	0.115789	2.63739e-05	-0.101024	0.0228395	0.0289431
ENSG00000110274	rs2305826:117241760:T:A	56486	64	83	0.436842	3.46764e-05	-0.0491709	0.0113003	0.034906
ENSG00000177098	rs12788933:118140184:C:T	136091	39	44	0.231579	3.012e-05	-0.242266	0.0552062	0.0316826
ENSG00000177098	rs4338560:118143368:C:T	139275	39	44	0.231579	3.012e-05	-0.242266	0.0552062	0.0316826
ENSG00000177098	rs11603267:118146599:G:T	142506	39	44	0.231579	3.02774e-05	-0.242094	0.0551841	0.0317816
ENSG00000160588	rs1624780	37375	65	80	0.421053	5.35918e-05	0.0857443	0.0202446	0.0464677
ENSG00000110375	rs1783860:117945485:G:T	-850389	26	29	0.152632	4.45558e-05	-0.281437	0.0656829	0.0410927
ENSG00000110375	rs1786186	-850242	26	29	0.152632	5.40179e-05	-0.277657	0.0655889	0.0467049
ENSG00000196655	rs507763:118824683:G:C	-64460	26	30	0.157895	2.18165e-06	0.151584	0.0300096	0.00517475
ENSG00000196655	rs537080:118826045:T:C	-63098	26	30	0.157895	2.20306e-06	0.151174	0.0299426	0.00521323
ENSG00000196655	rs45586434:118828184:C:A	-60959	23	27	0.142105	6.53406e-06	0.148343	0.0310323	0.0109817
ENSG00000196655	rs61506726:118831335:A:G	-57808	49	57	0.3	2.58378e-08	0.14795	0.0243178	0.000228786
ENSG00000196655	rs10892315	-57416	42	50	0.263158	5.49039e-08	0.143842	0.0243218	0.000388251
ENSG00000196655	rs10892316:118831755:C:T	-57388	23	27	0.142105	6.4313e-06	0.148573	0.0310547	0.0108808
ENSG00000196655	rs10892317:118832035:T:C	-57108	42	50	0.263158	5.25209e-08	0.144057	0.0243168	0.00037623
ENSG00000196655	rs112939258:118834718:C:T	-54425	23	27	0.142105	6.597e-06	0.148204	0.0310189	0.0110279
ENSG00000196655	rs113975105:118836606:C:G	-52537	42	50	0.263158	2.60051e-08	0.147208	0.0242017	0.000230132
ENSG00000196655	rs80126726:118852647:G:A	-36496	23	27	0.142105	6.6667e-06	0.148689	0.0311375	0.0111069
ENSG00000196655	rs113962716:118853021:C:A	-36122	23	27	0.142105	6.3866e-06	0.148978	0.031128	0.0108603
ENSG00000196655	rs11217109:118853774:T:C	-35369	23	27	0.142105	6.37246e-06	0.148976	0.031124	0.0108603
ENSG00000196655	rs75067211:118854372:C:T	-34771	39	45	0.236842	1.52865e-10	0.174061	0.0241741	6.81414e-06
ENSG00000196655	rs3887652:118856582:G:C	-32561	39	45	0.236842	1.55833e-10	0.173772	0.0241476	6.90642e-06
ENSG00000196655	rs4938617:118867695:C:T	-21448	22	25	0.131579	7.9918e-07	0.171048	0.0323165	0.00246465
ENSG00000196655	rs4938618:118867803:G:C	-21340	39	45	0.236842	1.59011e-10	0.173908	0.0241809	6.99285e-06
ENSG00000196655	rs4445645:118868750:G:C	-20393	46	52	0.273684	5.66382e-11	0.17844	0.0240793	3.40729e-06
ENSG00000196655	rs3737504:118869460:A:G	-19683	49	58	0.305263	1.37425e-08	0.149145	0.0239595	0.000147841
ENSG00000196655	rs11822103:118869539:G:A	-19604	39	45	0.236842	1.61449e-10	0.174118	0.0242211	7.04566e-06
ENSG00000196655	rs10892319:118870413:C:T	-18730	23	27	0.142105	6.45832e-06	0.14967	0.0312908	0.0109103
ENSG00000196655	rs4558175:118872581:G:A	-16562	49	58	0.305263	1.00414e-08	0.149156	0.0236964	0.000120434
ENSG00000196655	rs4573680:118872741:T:C	-16402	48	56	0.294737	2.47519e-09	0.157149	0.0238038	4.45616e-05
ENSG00000196655	rs368309024:118873052:ATT:A	-16091	47	56	0.294737	3.3882e-09	0.154634	0.0236683	5.72297e-05
ENSG00000196655	rs10892320:118873385:C:T	-15758	49	58	0.305263	9.96021e-09	0.149162	0.0236905	0.000119586
ENSG00000196655	rs9645663:118873840:T:C	-15303	23	27	0.142105	6.47902e-06	0.149852	0.0313342	0.0109244
ENSG00000196655	rs9645664:118873987:T:C	-15156	45	52	0.273684	2.52308e-10	0.167953	0.0236765	9.6114e-06
ENSG00000196655	rs4936457:118875727:A:G	-13416	48	57	0.3	1.2731e-08	0.148677	0.0238193	0.000141278
ENSG00000196655	rs4936458:118875761:T:G	-13382	48	57	0.3	1.2731e-08	0.148677	0.0238193	0.000141278
ENSG00000196655	rs76253444:118876213:A:G	-12930	23	27	0.142105	6.56735e-06	0.149251	0.0312307	0.0109962
ENSG00000196655	rs74884652:118876552:T:C	-12591	22	25	0.131579	7.73127e-07	0.171124	0.0322826	0.00240272
ENSG00000196655	rs58709307:118877563:C:T	-11580	44	51	0.268421	1.66578e-10	0.169916	0.0236584	7.16416e-06
ENSG00000196655	rs75154936:118877891:T:C	-11252	22	25	0.131579	7.58118e-07	0.171237	0.0322756	0.00236598
ENSG00000196655	rs11606357:118878222:T:C	-10921	44	50	0.263158	2.93547e-11	0.178214	0.023608	2.94323e-06
ENSG00000196655	rs73559119:118879824:T:C	-9319	47	54	0.284211	4.30108e-10	0.165709	0.0237417	1.44421e-05
ENSG00000196655	rs11825284:118880012:G:A	-9131	47	54	0.284211	4.27243e-10	0.165671	0.0237313	1.44103e-05
ENSG00000196655	rs11607569:118880668:T:C	-8475	38	43	0.226316	9.49422e-12	0.187757	0.0241168	1.38494e-06
ENSG00000196655	rs11217122:118880740:T:C	-8403	48	56	0.294737	2.10593e-09	0.156874	0.0236363	3.92775e-05
ENSG00000196655	rs60065241:118883491:C:A	-5652	47	55	0.289474	2.09257e-09	0.157467	0.0237208	3.92231e-05
ENSG00000196655	rs11828415:118884323:G:A	-4820	45	53	0.278947	1.06101e-09	0.159768	0.0235455	2.38677e-05
ENSG00000196655	rs11821562:118884370:T:C	-4773	45	53	0.278947	1.07008e-09	0.15979	0.0235551	2.39927e-05
ENSG00000196655	rs61381062:118884708:G:A	-4435	48	57	0.3	9.35786e-09	0.149101	0.023629	0.000113551
ENSG00000196655	rs58601794:118884726:T:C	-4417	48	57	0.3	9.29092e-09	0.149077	0.0236192	0.00011327
ENSG00000196655	rs59095933:118885161:G:A	-3982	45	53	0.278947	1.07584e-09	0.1599	0.0235753	2.40902e-05
ENSG00000196655	rs59608621:118885163:A:G	-3980	48	57	0.3	9.22535e-09	0.149052	0.0236094	0.00011327
ENSG00000196655	rs10111:118886117:C:T	-3026	44	51	0.268421	1.61389e-10	0.169642	0.0235982	7.04566e-06
ENSG00000196655	rs7131534	-2487	47	55	0.289474	1.97854e-09	0.157251	0.0236448	3.74971e-05
ENSG00000196655	rs7121270:118887568:T:G	-1575	48	56	0.294737	2.30208e-09	0.156426	0.0236378	4.19982e-05
ENSG00000196655	rs7105187:118887581:C:T	-1562	45	52	0.273684	2.29724e-10	0.167516	0.0235485	8.89992e-06
ENSG00000196655	rs3916581:118887887:G:T	-1256	39	45	0.236842	1.19762e-10	0.174555	0.0240695	5.87974e-06
ENSG00000196655	rs3916582:118887888:C:T	-1255	39	45	0.236842	1.19762e-10	0.174555	0.0240695	5.87974e-06
ENSG00000196655	rs11602764:118888619:A:G	-524	49	59	0.310526	3.32276e-08	0.141793	0.0235242	0.000274383
ENSG00000196655	rs11820805:118888831:T:C	-312	49	59	0.310526	3.18892e-08	0.141771	0.0234846	0.000265447
ENSG00000196655	rs11217124:118889132:A:G	-11	48	57	0.3	9.26724e-09	0.148969	0.0236001	0.00011327
ENSG00000196655	rs11217125:118889185:T:C	42	46	54	0.284211	1.67192e-09	0.158382	0.0236847	3.35861e-05
ENSG00000196655	rs7113753:118889378:G:A	235	53	67	0.352632	3.33373e-06	0.11396	0.0230345	0.00709703
ENSG00000196655	rs4938619:118890085:C:T	942	22	25	0.131579	7.65212e-07	0.171726	0.0323813	0.00238376
ENSG00000196655	rs10696222:118890542:A:AAAT	1399	47	57	0.3	1.14821e-08	0.147547	0.0235519	0.000131748
ENSG00000196655	rs367778875:118891136:ATTC:A	1993	22	25	0.131579	7.3555e-07	0.171923	0.032361	0.0023118
ENSG00000196655	rs4938621:118892277:C:T	3134	44	50	0.263158	3.44492e-11	0.177971	0.0236813	3.07347e-06
ENSG00000196655	rs117289748:118892757:C:G	3614	38	43	0.226316	1.31664e-11	0.187745	0.0243288	1.83632e-06
ENSG00000196655	rs143660533:118892759:A:C	3616	38	43	0.226316	1.31664e-11	0.187745	0.0243288	1.83632e-06
ENSG00000196655	rs61179449:118892835:G:C	3692	44	50	0.263158	3.84613e-11	0.17743	0.0236824	3.17217e-06
ENSG00000196655	rs58955701:118892872:C:T	3729	44	50	0.263158	3.90987e-11	0.177398	0.0236892	3.17217e-06
ENSG00000196655	rs7127188:118893023:A:C	3880	44	50	0.263158	3.78921e-11	0.177349	0.0236617	3.17217e-06
ENSG00000196655	rs111345266:118893767:C:T	4624	22	25	0.131579	7.42107e-07	0.172502	0.0324831	0.00232749
ENSG00000196655	rs111322300:118893878:T:C	4735	38	43	0.226316	1.24308e-11	0.187975	0.0243207	1.75522e-06
ENSG00000196655	rs569:118894287:A:G	5144	38	43	0.226316	1.26238e-11	0.187957	0.0243285	1.77514e-06
ENSG00000196655	rs11006:118895202:A:G	6059	38	43	0.226316	1.19011e-11	0.188432	0.0243511	1.6874e-06
ENSG00000196655	rs2276072:118896115:A:G	6972	39	45	0.236842	2.06165e-10	0.174928	0.0245111	8.21062e-06
ENSG00000196655	rs2276071:118896116:A:C	6973	39	45	0.236842	2.06165e-10	0.174928	0.0245111	8.21062e-06
ENSG00000160695	rs582688:118932320:C:T	-6084	39	42	0.221053	2.14182e-05	-0.0712332	0.0159092	0.0251034
ENSG00000160695	rs636283:118932445:T:C	-5959	37	39	0.205263	2.34716e-05	-0.0742755	0.0166775	0.0266872
ENSG00000160695	rs34321210:118933248:A:ACTT	-5156	39	42	0.221053	1.96821e-05	-0.0716253	0.0159188	0.0237438
ENSG00000160695	rs471000:118936910:T:C	-1494	37	38	0.2	2.00117e-05	-0.077281	0.0171923	0.0239746
ENSG00000160695	rs670526:118938882:C:T	478	37	38	0.2	1.96033e-05	-0.0773483	0.0171868	0.0236629
ENSG00000160695	rs484263:118940479:T:C	2075	37	38	0.2	1.96033e-05	-0.0773483	0.0171868	0.0236629
ENSG00000143079	rs2488762	946	53	77	0.405263	3.31982e-05	0.0368068	0.00843655	0.0339455
ENSG00000149554	rs149604695:125431763:GC:G	-63274	12	12	0.0631579	4.17855e-05	0.225973	0.0525289	0.0392194
ENSG00000149554	rs11220129:125434825:C:A	-60212	12	12	0.0631579	4.14777e-05	0.226196	0.0525567	0.0390393
ENSG00000149554	rs140628451:125449494:C:T	-45543	12	12	0.0631579	4.11532e-05	0.226967	0.0527105	0.0388965
[truncated: 38,355 more rows]
