# Supplementary material for: Multi-omics colocalization with genome-wide association studies reveals a context-specific genetic mechanism at a childhood onset asthma risk locus
Source: Genome Med. 2021 Oct 10;13:157. doi: 10.1186/s13073-021-00967-y (PMC8504130; doi:10.1186/s13073-021-00967-y)
Supplement: Supplementary file 7 — Additional file 7:. FastQTL eQTL mapping results for RV-treated AECs (FDR< 0.05). [file 13073_2021_967_MOESM7_ESM.xlsx]

## Sheet: Legend for Additional File 7
Additional File 7 FastQTL eQTL mapping results for RV-treated AECs (FDR<0.05)

## Sheet: Additional File 7
gene_id	variant_id	tss_distance	ma_samples	ma_count	maf	npval	slope	slope_se	fdr
ENSG00000166275	rs4919682	-29651	34	38	0.2	4.65177e-05	-0.161174	0.0377164	0.0445012
ENSG00000166275	rs4919684:104587024:A:G	-26957	33	36	0.189474	1.5073e-05	-0.175897	0.0385044	0.0209774
ENSG00000166275	rs4919685:104587362:G:T	-26619	33	36	0.189474	1.56212e-05	-0.175686	0.0385356	0.0214873
ENSG00000166275	rs12254149:104589747:C:T	-24234	33	36	0.189474	1.48316e-05	-0.176378	0.0385748	0.0207202
ENSG00000166275	rs370403866:104590836:AGGGAACCCTGATCTGAGGATGTAGCCTTATTATGG:A	-23145	35	38	0.2	4.63026e-05	-0.166885	0.0390417	0.0443476
ENSG00000166275	rs10883783:104591152:T:A	-22829	33	36	0.189474	1.44791e-05	-0.176821	0.0386194	0.0203995
ENSG00000166275	rs743575:104594906:T:G	-19075	33	36	0.189474	1.19613e-05	-0.179173	0.0387199	0.0178844
ENSG00000166275	rs4919687:104595248:G:A	-18733	33	36	0.189474	1.18472e-05	-0.179411	0.0387509	0.0177666
ENSG00000166275	rs10883784:104597922:C:T	-16059	33	36	0.189474	1.4023e-05	-0.177818	0.0387678	0.0199665
ENSG00000166275	rs10786714:104598606:G:C	-15375	33	37	0.194737	8.49994e-06	-0.17508	0.0371396	0.0139185
ENSG00000166275	rs11191415:104602575:G:T	-11406	33	36	0.189474	1.4023e-05	-0.177818	0.0387678	0.0199665
ENSG00000166275	rs12775431:104611764:A:C	-2217	29	31	0.163158	5.25097e-05	-0.178172	0.042013	0.0482981
ENSG00000166275	rs4919690	2519	29	31	0.163158	5.25097e-05	-0.178172	0.042013	0.0482981
ENSG00000166275	rs11441374:104619292:A:AC	5311	29	31	0.163158	5.25097e-05	-0.178172	0.042013	0.0482981
ENSG00000166275	rs11191421:104623053:C:G	9072	29	31	0.163158	5.25097e-05	-0.178172	0.042013	0.0482981
ENSG00000166275	rs9527:104623578:C:T	9597	29	31	0.163158	5.25097e-05	-0.178172	0.042013	0.0482981
ENSG00000065618	rs149442405:106517623:CCCCA:C	726578	36	42	0.221053	4.03035e-05	-0.0804723	0.0186647	0.040567
ENSG00000065618	rs10786818:106518760:C:T	727715	36	42	0.221053	4.10261e-05	-0.0804378	0.0186772	0.0409818
ENSG00000065618	rs4918126:106521003:C:T	729958	36	42	0.221053	4.10261e-05	-0.0804378	0.0186772	0.0409818
ENSG00000065618	rs2491392:106557944:G:C	766899	40	49	0.257895	5.56412e-05	0.0726325	0.0171897	0.049923
ENSG00000065621	rs2282326:106020398:A:C	-8234	55	77	0.405263	2.5225e-06	-0.296717	0.0591569	0.00585707
ENSG00000065621	rs1147611:106025258:G:T	-3374	57	81	0.426316	3.8777e-06	-0.287909	0.0586361	0.00781118
ENSG00000065621	rs641071:106028157:G:T	-475	57	81	0.426316	3.87683e-06	-0.287759	0.0586048	0.00781036
ENSG00000065621	rs568526:106033439:T:C	4807	55	77	0.405263	6.67793e-06	-0.284269	0.0595352	0.0117295
ENSG00000065621	rs276204:106035313:C:G	6681	55	77	0.405263	6.76613e-06	-0.284067	0.059534	0.0118231
ENSG00000065621	rs7099030:106038347:T:C	9715	50	66	0.347368	3.28979e-05	-0.280078	0.0641619	0.0353258
ENSG00000065621	rs156697	10553	55	77	0.405263	6.74428e-06	-0.283932	0.0594956	0.011821
ENSG00000065621	rs276203:106039303:A:G	10671	55	77	0.405263	6.74428e-06	-0.283932	0.0594956	0.011821
ENSG00000065621	rs6584592:106039780:C:T	11148	50	66	0.347368	2.68893e-05	-0.284169	0.0643185	0.0308749
ENSG00000065621	rs1865926:106042502:G:T	13870	41	50	0.263158	5.24063e-05	-0.309838	0.0730505	0.0482518
ENSG00000065621	rs35528873:106045962:GT:G	17330	51	72	0.378947	4.44339e-06	-0.289227	0.0593117	0.00863768
ENSG00000065621	rs276210:106046403:A:G	17771	51	72	0.378947	4.40178e-06	-0.289376	0.0593138	0.00857759
ENSG00000065621	rs157076:106048294:C:G	19662	52	72	0.378947	3.37605e-06	-0.294498	0.0595635	0.00711375
ENSG00000065621	rs11191989:106050315:T:C	21683	37	44	0.231579	2.9665e-05	-0.331078	0.0753753	0.0329208
ENSG00000065621	10:106053321:A:ATTTTTTTT	24689	51	69	0.363158	3.35243e-05	-0.273689	0.0627698	0.0358054
ENSG00000065621	rs156699	25009	52	73	0.384211	1.09239e-05	-0.277321	0.0596322	0.0167778
ENSG00000065621	rs157081:106055024:C:T	26392	52	73	0.384211	1.08858e-05	-0.277458	0.0596502	0.0167468
ENSG00000065621	rs157080:106055963:C:A	27331	52	73	0.384211	1.08934e-05	-0.277427	0.059646	0.0167532
ENSG00000065621	rs3740466:106061169:C:T	32537	39	46	0.242105	5.24804e-05	-0.321759	0.0758679	0.0482844
ENSG00000065621	rs34119210:106065999:CTT:C	37367	37	44	0.231579	2.69478e-05	-0.33348	0.0754893	0.0309263
ENSG00000065621	rs11192001:106067978:G:A	39346	39	46	0.242105	5.13116e-05	-0.322353	0.0759	0.0475166
ENSG00000065621	rs10491046:106071001:A:G	42369	39	46	0.242105	5.136e-05	-0.322416	0.0759193	0.0475549
ENSG00000065621	rs505701:106073566:T:C	44934	52	73	0.384211	1.02356e-05	-0.279122	0.0598068	0.0159942
ENSG00000065621	rs11595547:106076414:A:G	47782	37	44	0.231579	2.68323e-05	-0.33443	0.0756851	0.0308448
ENSG00000065621	rs7072534:106081702:A:G	53070	43	50	0.263158	3.81111e-05	-0.328813	0.0760032	0.0390131
ENSG00000065621	rs34564259:106084356:C:A	55724	43	49	0.257895	4.27401e-05	-0.335664	0.0781365	0.0421253
ENSG00000065621	rs11192007:106086395:T:C	57763	41	47	0.247368	2.03763e-05	-0.349256	0.077778	0.0259895
ENSG00000065621	rs7095770	70776	41	50	0.263158	5.54893e-05	-0.304626	0.0720824	0.0498234
ENSG00000065621	rs12359649:106111179:A:G	82547	41	50	0.263158	5.53874e-05	-0.306163	0.0724375	0.0497709
ENSG00000119950	rs12416636:111838523:T:C	-128841	30	39	0.205263	6.05374e-06	0.12862	0.0267994	0.0108809
ENSG00000119950	10:111840070	-127294	29	38	0.2	6.75175e-06	0.127248	0.0266653	0.0118231
ENSG00000119950	rs11194975:111842488:G:A	-124876	31	40	0.210526	1.39457e-05	0.123142	0.0268391	0.019895
ENSG00000119950	rs2007010:111852663:G:A	-114701	31	40	0.210526	1.51821e-05	0.122733	0.0268776	0.0210909
ENSG00000119950	rs4918480:111887316:A:G	-80048	31	40	0.210526	9.9912e-06	0.125019	0.0267524	0.0157341
ENSG00000119950	rs10884929:111895931:T:C	-71433	32	41	0.215789	1.25703e-05	0.123702	0.0268059	0.0184695
ENSG00000119950	rs10884931:111911687:C:T	-55677	33	41	0.215789	3.98274e-06	0.134199	0.0273681	0.00797366
ENSG00000119950	rs12416245:111938114:T:G	-29250	36	47	0.247368	7.46028e-06	0.120115	0.0253033	0.0126281
ENSG00000119950	rs10884933	-23928	36	47	0.247368	7.44939e-06	0.119563	0.0251852	0.0126171
ENSG00000119950	rs57440394:111946743:A:T	-20621	39	50	0.263158	3.93688e-05	0.1118	0.0258935	0.0398914
ENSG00000119950	rs12245108:111946749:T:C	-20615	39	50	0.263158	3.93688e-05	0.1118	0.0258935	0.0398914
ENSG00000119950	rs4917552:111946985:A:G	-20379	39	50	0.263158	3.82427e-05	0.112055	0.0259063	0.0390739
ENSG00000119950	rs1573043:111947177:A:G	-20187	39	50	0.263158	3.77701e-05	0.11216	0.0259109	0.0388218
ENSG00000119950	rs1891374:111966844:C:T	-520	35	39	0.205263	3.72472e-05	0.135426	0.0312592	0.0384379
ENSG00000119950	rs1342273	5975	35	39	0.205263	3.5573e-05	0.135101	0.0310968	0.0372291
ENSG00000119950	rs1977829:111975041:G:A	7677	35	39	0.205263	3.06456e-05	0.137054	0.0312634	0.0337056
ENSG00000119950	rs12256823:111977189:G:C	9825	35	39	0.205263	2.63487e-05	0.138375	0.031282	0.0304516
ENSG00000119950	rs7083406:111979424:C:T	12060	35	39	0.205263	2.37399e-05	0.139396	0.0313201	0.0287099
ENSG00000119950	rs12264946:111981118:C:T	13754	33	37	0.194737	2.16298e-05	0.140444	0.0313847	0.0270455
ENSG00000119950	rs7072547:111982398:G:A	15034	33	37	0.194737	2.1914e-05	0.139966	0.0313016	0.0272148
ENSG00000119950	rs4918487:111984756:C:T	17392	31	34	0.178947	2.86158e-05	0.144975	0.0329351	0.0321777
ENSG00000119950	rs4917554:111985027:G:C	17663	33	37	0.194737	2.14466e-05	0.139999	0.0312698	0.0268693
ENSG00000119950	rs35741140:111985946:G:C	18582	31	34	0.178947	2.83035e-05	0.144998	0.0329188	0.0319352
ENSG00000119950	rs12774613:111987071:G:A	19707	31	34	0.178947	2.72731e-05	0.145533	0.0329676	0.0310752
ENSG00000119950	rs11812839:111989675:G:A	22311	31	34	0.178947	2.70514e-05	0.145403	0.0329221	0.0309745
ENSG00000119950	rs10884940:111989799:C:G	22435	57	76	0.4	9.95473e-06	0.110008	0.0235355	0.0156937
ENSG00000119950	rs4917555:111991129:C:A	23765	31	34	0.178947	2.71153e-05	0.145229	0.0328873	0.031009
ENSG00000119950	rs76863268:111995452:T:A	28088	59	78	0.410526	1.4726e-05	0.109373	0.0239108	0.0206367
ENSG00000119950	rs10884941:111995565:T:G	28201	57	76	0.4	9.14808e-06	0.110354	0.023502	0.0146604
ENSG00000119950	rs1418362:112003642:T:A	36278	29	32	0.168421	1.17043e-05	0.154073	0.0332559	0.0176379
ENSG00000119950	rs1418361:112003800:T:G	36436	33	37	0.194737	2.01688e-05	0.140553	0.0312822	0.0257941
ENSG00000119950	rs3793888:112004970:T:C	37606	33	37	0.194737	2.17212e-05	0.139438	0.0311676	0.0270974
ENSG00000119950	rs4918488:112006408:A:C	39044	33	37	0.194737	2.17659e-05	0.139397	0.031162	0.0271271
ENSG00000119950	rs7073003:112006973:C:A	39609	33	37	0.194737	2.17212e-05	0.139438	0.0311676	0.0270974
ENSG00000119950	rs11436693:112009105:T:TA	41741	33	37	0.194737	2.17659e-05	0.139397	0.031162	0.0271271
ENSG00000119950	rs113478219:112010602:A:T	43238	33	35	0.184211	7.65937e-06	0.158612	0.0334599	0.0128739
ENSG00000119950	rs71479294:112011084:A:G	43720	18	20	0.105263	7.05252e-06	0.182302	0.0382898	0.0121397
ENSG00000119950	rs7922679:112014428:T:G	47064	57	76	0.4	7.90085e-06	0.110837	0.0234202	0.0131791
ENSG00000119950	rs4917556:112018297:A:G	50933	33	37	0.194737	2.17212e-05	0.139438	0.0311676	0.0270974
ENSG00000119950	rs34378439:112018687:T:TCC	51323	33	37	0.194737	2.17212e-05	0.139438	0.0311676	0.0270974
ENSG00000119950	rs112975324:112023834:A:AGT	56470	55	71	0.373684	8.62661e-06	0.113364	0.0240669	0.0140591
ENSG00000119950	rs11195055:112025855:G:A	58491	33	37	0.194737	2.17212e-05	0.139438	0.0311676	0.0270974
ENSG00000119950	rs7920438:112025934:T:G	58570	33	37	0.194737	2.17212e-05	0.139438	0.0311676	0.0270974
ENSG00000119950	rs7917093:112028631:G:A	61267	32	36	0.189474	2.10441e-05	0.140079	0.0312534	0.0265835
ENSG00000119950	rs1935465	61936	56	75	0.394737	8.99348e-06	0.109372	0.0232715	0.0144929
ENSG00000119950	rs7894595:112030880:A:G	63516	32	36	0.189474	2.10441e-05	0.140079	0.0312534	0.0265835
ENSG00000119950	rs12260786:112032145:A:C	64781	32	36	0.189474	2.10441e-05	0.140079	0.0312534	0.0265835
ENSG00000119950	rs3737315:112035508:G:T	68144	57	76	0.4	4.09072e-05	0.102772	0.0238588	0.0409212
ENSG00000119950	rs35957473:112035723:T:TA	68359	32	36	0.189474	2.10441e-05	0.140079	0.0312534	0.0265835
ENSG00000119950	rs36065116:112036371:A:AT	69007	57	77	0.405263	1.2698e-05	0.108553	0.0235364	0.018606
ENSG00000119950	rs12263999:112036646:T:G	69282	32	36	0.189474	2.10441e-05	0.140079	0.0312534	0.0265835
ENSG00000119950	rs12256505:112036882:G:C	69518	32	36	0.189474	2.10441e-05	0.140079	0.0312534	0.0265835
ENSG00000119950	rs11195062	69611	56	72	0.378947	8.14284e-06	0.114583	0.0242508	0.0134816
ENSG00000119950	rs12243448:112037574:A:G	70210	32	36	0.189474	2.13185e-05	0.139964	0.0312511	0.0267725
ENSG00000119950	rs35212840:112042591:A:T	75227	24	26	0.136842	3.75664e-06	0.173941	0.0353688	0.00765892
ENSG00000198924	rs3862016:115322922:C:T	-271567	55	76	0.4	4.05139e-05	0.0508864	0.0118064	0.0406655
ENSG00000198924	rs7088038:115324499:G:A	-269990	57	80	0.421053	5.13996e-05	0.049711	0.011706	0.0475807
ENSG00000187164	rs7083543:118616110:C:T	-27633	44	48	0.252632	1.14754e-05	0.102151	0.0220248	0.0174106
ENSG00000187164	rs7087685:118616537:G:A	-27206	44	48	0.252632	1.14005e-05	0.102167	0.0220204	0.0173281
ENSG00000187164	rs9421248:118617261:T:C	-26482	44	48	0.252632	1.25749e-05	0.101154	0.0219201	0.0184706
ENSG00000187164	rs4752015:118619783:A:G	-23960	43	48	0.252632	2.44697e-05	0.0971905	0.021876	0.0292793
ENSG00000187164	rs11197834:118619934:G:A	-23809	39	43	0.226316	3.72726e-05	0.0972127	0.0224396	0.0384571
ENSG00000187164	rs9420215:118620777:T:C	-22966	44	49	0.257895	2.43636e-05	0.0950742	0.0213942	0.029199
ENSG00000187164	rs2170862	-22747	44	49	0.257895	3.25797e-05	0.0931471	0.0213262	0.0351244
ENSG00000187164	rs9421249:118623322:C:T	-20421	44	48	0.252632	1.04879e-05	0.102301	0.0219488	0.0162864
ENSG00000187164	rs2531685:118646129:G:C	2386	52	63	0.331579	1.85602e-08	-0.108274	0.0175828	0.00018824
ENSG00000187164	rs5788199:118649704:T:TA	5961	53	64	0.336842	1.77419e-07	-0.101291	0.0179411	0.000905139
ENSG00000187164	rs10510025:118650996:C:T	7253	44	50	0.263158	1.41577e-06	0.103875	0.0201466	0.00389708
ENSG00000187164	rs2531686:118651011:C:G	7268	55	67	0.352632	1.29452e-07	-0.102032	0.0178428	0.000714715
ENSG00000187164	rs740600	8139	53	64	0.336842	1.76044e-07	-0.10118	0.0179158	0.000898805
ENSG00000187164	rs2531689:118665788:G:A	22045	56	69	0.363158	2.60987e-06	-0.0904346	0.0180601	0.00601063
ENSG00000187164	rs10886016:118668311:G:A	24568	44	50	0.263158	2.00846e-06	0.102431	0.0201982	0.00502511
ENSG00000187164	rs2627194:118668477:T:A	24734	54	66	0.347368	3.35534e-06	-0.0903531	0.0182687	0.00707631
ENSG00000187164	rs1419832:118670282:A:G	26539	54	66	0.347368	1.42304e-08	-0.108466	0.0174463	0.000153423
ENSG00000187164	rs10886017:118672531:C:A	28788	48	56	0.294737	1.49785e-07	0.108539	0.0190927	0.000786799
ENSG00000187164	rs4752018:118678712:C:A	34969	40	45	0.236842	4.19093e-07	0.111917	0.0205522	0.00166898
ENSG00000187164	rs200595759:118683917:TATA:T	40174	54	63	0.331579	3.31483e-08	-0.110785	0.0183782	0.00026851
ENSG00000187164	rs719012:118689195:T:C	45452	54	65	0.342105	2.89969e-06	-0.0927337	0.0186151	0.00643479
ENSG00000187164	rs7089699:118692698:A:G	48955	46	52	0.273684	1.06725e-06	0.104606	0.0200248	0.00318441
ENSG00000187164	rs6585422:118695141:T:C	51398	46	52	0.273684	1.06725e-06	0.104606	0.0200248	0.00318441
ENSG00000187164	rs4751614:118696266:A:T	52523	40	45	0.236842	4.79652e-07	0.110466	0.0204047	0.00183424
ENSG00000187164	rs7079724:118697466:G:A	53723	54	63	0.331579	3.29898e-08	-0.110763	0.0183712	0.00026851
ENSG00000187164	rs7074047:118709379:A:T	65636	55	67	0.352632	7.2425e-07	-0.096185	0.0180924	0.00240796
ENSG00000187164	rs1905542:118712455:T:C	68712	47	53	0.278947	1.58712e-06	0.103623	0.0202058	0.00421413
ENSG00000187164	rs7077565:118715366:C:T	71623	45	51	0.268421	2.33375e-06	0.101981	0.0202554	0.00555198
ENSG00000187164	rs7902527	71656	41	46	0.242105	8.58745e-07	0.108359	0.0205389	0.00272321
ENSG00000187164	rs34348857:118718188:CA:C	74445	53	62	0.326316	9.46328e-08	-0.107657	0.0185929	0.000564861
ENSG00000187164	rs4092881:118718210:G:C	74467	45	51	0.268421	2.53973e-06	0.101793	0.0203013	0.00588896
ENSG00000187164	rs2118207:118728991:T:C	85248	53	62	0.326316	9.54047e-08	0.107642	0.0185962	0.000565421
ENSG00000187164	rs7083142:118733562:G:C	89819	56	67	0.352632	2.76306e-07	-0.101705	0.0183486	0.00122842
ENSG00000187164	rs11197861:118734346:T:C	90603	40	45	0.236842	1.33399e-06	0.107666	0.020824	0.00372616
ENSG00000187164	rs1905541:118735633:C:T	91890	45	51	0.268421	2.47635e-06	0.101876	0.020293	0.00579746
ENSG00000187164	rs2101264:118737037:T:C	93294	47	53	0.278947	1.70916e-06	0.103461	0.0202451	0.00445874
ENSG00000187164	rs1905539:118739314:T:C	95571	43	48	0.252632	6.17704e-07	0.10952	0.0204554	0.00215764
ENSG00000187164	rs7903295:118740141:G:A	96398	47	53	0.278947	1.61184e-06	0.103551	0.0202065	0.00427101
ENSG00000187164	rs11197863:118745667:A:G	101924	55	64	0.336842	4.54185e-08	-0.110619	0.0185694	0.000324229
ENSG00000187164	rs10787735:118750248:G:A	106505	55	65	0.342105	7.48846e-08	-0.106992	0.0183093	0.000478582
ENSG00000187164	rs1122688:118752250:C:T	108507	46	52	0.273684	1.47461e-06	-0.104205	0.0202492	0.00399801
ENSG00000187164	rs10218905:118757139:A:G	113396	47	53	0.278947	1.47228e-06	0.104293	0.0202648	0.00399551
ENSG00000187164	rs11593277:118757354:A:C	113611	54	65	0.342105	2.53999e-07	-0.100812	0.0181233	0.00117678
ENSG00000187164	rs1905538:118760270:T:C	116527	54	65	0.342105	2.45573e-07	-0.100956	0.0181236	0.00114451
ENSG00000187164	rs12774341:118773333:T:C	129590	54	65	0.342105	2.44346e-07	-0.101305	0.0181824	0.00114005
ENSG00000165650	rs2283142:119031450:G:C	-8551	16	16	0.0842105	1.94376e-05	-0.178548	0.039654	0.0251435
ENSG00000165650	rs10377:119037009:A:C	-2992	67	90	0.473684	9.91049e-08	0.111414	0.019277	0.000582331
ENSG00000165650	rs14240:119037071:T:C	-2930	67	90	0.473684	9.94978e-08	0.111403	0.019278	0.000582911
ENSG00000165650	rs363237:119038528:T:C	-1473	67	90	0.473684	9.91049e-08	0.111414	0.019277	0.000582331
ENSG00000165650	rs12221325:119050998:C:T	10997	16	16	0.0842105	1.81133e-05	-0.178683	0.0395239	0.023935
ENSG00000165650	rs10886054:119052773:C:G	12772	67	90	0.473684	9.91049e-08	0.111414	0.019277	0.000582331
ENSG00000165650	rs144031212:119055011:AACAC:A	15010	67	90	0.473684	9.55146e-08	0.111298	0.0192287	0.000565853
ENSG00000165650	rs2490628:119055123:T:C	15122	67	90	0.473684	9.91049e-08	0.111414	0.019277	0.000582331
ENSG00000165650	rs11197945:119062473:G:A	22472	16	16	0.0842105	1.81133e-05	-0.178683	0.0395239	0.023935
ENSG00000165650	rs181440	63470	67	90	0.473684	1.03698e-07	0.110735	0.0191939	0.000603212
ENSG00000107581	rs112813667:120037604:C:T	-756753	10	12	0.0631579	3.02973e-06	-0.128567	0.025864	0.00656735
ENSG00000198873	rs1810158:120955500:T:C	-11602	30	35	0.184211	4.88839e-05	-0.129278	0.0303466	0.0460302
ENSG00000107679	rs4752689:124131176:G:A	-3037	61	75	0.394737	3.559e-05	0.0793037	0.0182542	0.0372377
ENSG00000196177	rs9423240	-18409	56	74	0.389474	3.56903e-06	0.0514656	0.0104381	0.00740505
ENSG00000196177	rs9423301:124750264:T:C	-18232	56	74	0.389474	3.58445e-06	0.0514629	0.0104398	0.00742926
ENSG00000196177	rs9423242:124754529:T:C	-13967	56	74	0.389474	3.58445e-06	0.0514629	0.0104398	0.00742926
ENSG00000196177	rs34133849:124754657:GA:G	-13839	55	71	0.373684	5.99952e-06	0.0517767	0.0107832	0.0108118
ENSG00000196177	rs9423243:124755057:A:G	-13439	55	71	0.373684	7.49751e-06	0.051137	0.0107754	0.0126762
ENSG00000196177	rs9423244:124755111:G:T	-13385	55	71	0.373684	7.49751e-06	0.051137	0.0107754	0.0126762
ENSG00000196177	rs4980242:124757500:T:A	-10996	55	73	0.384211	2.90103e-06	0.0516315	0.0103646	0.00643525
ENSG00000196177	rs9423245:124758693:A:G	-9803	55	71	0.373684	7.49751e-06	0.051137	0.0107754	0.0126762
ENSG00000196177	rs9328841:124759408:C:T	-9088	56	74	0.389474	3.58445e-06	0.0514629	0.0104398	0.00742926
ENSG00000196177	rs9423303:124761763:A:G	-6733	55	71	0.373684	7.49751e-06	0.051137	0.0107754	0.0126762
ENSG00000196177	rs9423306:124763196:A:G	-5300	55	71	0.373684	7.49751e-06	0.051137	0.0107754	0.0126762
ENSG00000196177	rs7899321:124764662:T:A	-3834	55	71	0.373684	6.87667e-06	0.0513834	0.010778	0.0119374
ENSG00000196177	rs9328842:124765857:T:C	-2639	55	71	0.373684	7.49751e-06	0.051137	0.0107754	0.0126762
ENSG00000196177	rs2277249:124768034:A:G	-462	55	71	0.373684	7.47339e-06	0.0512194	0.0107909	0.0126464
ENSG00000196177	rs2277250:124768292:G:A	-204	55	71	0.373684	7.49773e-06	0.0511394	0.0107759	0.0126762
ENSG00000196177	rs2280707:124768960:G:C	464	55	71	0.373684	7.49773e-06	0.0511394	0.0107759	0.0126762
ENSG00000196177	rs9423308:124772043:T:C	3547	56	74	0.389474	3.58994e-06	0.0514616	0.0104403	0.00743561
ENSG00000196177	rs9423309:124772161:A:G	3665	56	74	0.389474	3.58994e-06	0.0514616	0.0104403	0.00743561
ENSG00000196177	rs9423310:124772616:A:C	4120	56	74	0.389474	3.58994e-06	0.0514616	0.0104403	0.00743561
ENSG00000196177	rs9423311:124772765:A:C	4269	56	74	0.389474	3.58994e-06	0.0514616	0.0104403	0.00743561
ENSG00000196177	rs10902860:124773343:C:G	4847	56	74	0.389474	3.58994e-06	0.0514616	0.0104403	0.00743561
ENSG00000196177	rs7915923:124773737:T:C	5241	56	74	0.389474	3.58994e-06	0.0514616	0.0104403	0.00743561
ENSG00000196177	rs2421142:124773924:C:T	5428	56	74	0.389474	3.58994e-06	0.0514616	0.0104403	0.00743561
ENSG00000196177	rs4980243:124775799:G:T	7303	56	75	0.394737	5.84223e-06	0.0498337	0.0103642	0.0105968
ENSG00000196177	rs4980244:124775852:T:C	7356	56	75	0.394737	5.69344e-06	0.0498304	0.0103496	0.0104015
ENSG00000196177	rs9423247:124776426:C:G	7930	56	75	0.394737	5.69344e-06	0.0498304	0.0103496	0.0104015
ENSG00000196177	rs2901353:124776817:A:T	8321	56	75	0.394737	5.69344e-06	0.0498304	0.0103496	0.0104015
ENSG00000196177	rs9423313:124778100:A:G	9604	56	74	0.389474	3.58994e-06	0.0514616	0.0104403	0.00743561
ENSG00000196177	rs9423314:124778364:A:G	9868	56	74	0.389474	3.58994e-06	0.0514616	0.0104403	0.00743561
ENSG00000196177	rs11248363:124780032:T:G	11536	67	88	0.463158	4.54957e-05	0.047775	0.0111644	0.0438475
ENSG00000196177	rs9423248:124780998:C:T	12502	56	75	0.394737	5.7025e-06	0.0498287	0.0103501	0.0104157
ENSG00000196177	rs4463791:124784608:A:T	16112	56	75	0.394737	5.70081e-06	0.0498405	0.0103524	0.0104132
ENSG00000196177	rs10794584:124787047:T:C	18551	66	86	0.452632	4.71611e-05	0.0480595	0.0112561	0.0449028
ENSG00000196177	rs9423250:124788587:T:G	20091	67	86	0.452632	4.40159e-05	0.0489268	0.0114101	0.0429165
ENSG00000170430	rs524804:131430686:G:A	165237	66	85	0.447368	1.09804e-05	-0.116709	0.0251031	0.0168342
ENSG00000170430	rs7906680:131442671:C:G	177222	66	86	0.452632	5.90256e-06	-0.117512	0.0244527	0.0106724
ENSG00000170430	rs7074106:131443520:T:A	178071	66	86	0.452632	5.87007e-06	-0.117513	0.0244458	0.0106359
ENSG00000170430	rs11016853:131443990:A:G	178541	65	83	0.436842	2.3708e-06	-0.123971	0.0246419	0.00561152
ENSG00000170430	rs12265758:131445144:A:G	179695	66	85	0.447368	2.90699e-06	-0.122175	0.024528	0.00643996
ENSG00000170430	rs12265939:131445398:A:G	179949	66	86	0.452632	5.80647e-06	-0.117513	0.024432	0.0105594
ENSG00000170430	rs7905095	182694	66	86	0.452632	5.80647e-06	-0.117513	0.024432	0.0105594
ENSG00000148814	rs12269628:134130159:C:T	-15456	26	27	0.142105	4.07797e-07	0.300087	0.0550423	0.0016603
ENSG00000148814	rs76502537:134139068:A:G	-6547	30	32	0.168421	1.91597e-08	0.302656	0.0492053	0.00019232
ENSG00000148814	rs6560691:134140245:A:G	-5370	33	37	0.194737	1.08045e-06	0.246794	0.0472702	0.00321366
ENSG00000148814	rs7085852:134144005:T:C	-1610	46	51	0.268421	7.7444e-06	0.213654	0.0450978	0.0129715
ENSG00000148814	rs76805118:134144739:G:A	-876	32	33	0.173684	1.08399e-08	0.314275	0.0500634	0.000134447
ENSG00000148814	rs71013522:134145441:C:CT	-174	32	33	0.173684	1.22576e-08	0.313267	0.0501204	0.00013709
ENSG00000148814	rs3923974:134146084:C:T	469	32	33	0.173684	1.3259e-08	0.312634	0.0501591	0.000146347
ENSG00000148814	rs2295273:134150920:T:G	5305	32	33	0.173684	1.57414e-08	0.31115	0.0502286	0.0001654
ENSG00000148814	rs7098749:134157220:G:A	11605	32	33	0.173684	2.11149e-08	0.309972	0.0505731	0.000205872
ENSG00000148814	rs11146339:134158448:G:A	12833	32	33	0.173684	1.71491e-08	0.311595	0.0504557	0.000177916
ENSG00000148814	rs55813610:134163693:T:G	18078	35	37	0.194737	8.63126e-07	0.261079	0.0494977	0.00272551
ENSG00000148814	rs7090409:134164622:C:T	19007	32	33	0.173684	2.04195e-08	0.310466	0.050592	0.000200777
ENSG00000148814	rs56678407:134167502:C:A	21887	32	33	0.173684	2.44021e-08	0.309543	0.0507712	0.000226902
ENSG00000239665	rs7904797:13283291:C:T	-368757	13	14	0.0736842	1.99579e-05	0.206592	0.0459523	0.0255964
ENSG00000107959	rs7917172:3147926:C:T	-31995	17	18	0.0947368	1.03251e-06	-0.182338	0.034852	0.00310385
ENSG00000107959	rs7907949:3148056:G:A	-31865	17	18	0.0947368	1.12116e-06	-0.181884	0.0348969	0.00330268
ENSG00000107959	rs112196862:3148635:G:A	-31286	20	21	0.110526	1.16709e-05	-0.150951	0.0325769	0.017601
ENSG00000107959	rs117781684:3149151:C:T	-30770	19	20	0.105263	7.40282e-06	-0.157166	0.0330951	0.0125655
ENSG00000107959	rs17132175:3150814:G:C	-29107	20	21	0.110526	1.6511e-05	-0.15031	0.0330731	0.022403
ENSG00000107959	rs56221890:3151824:G:A	-28097	20	21	0.110526	1.64829e-05	-0.150174	0.0330399	0.0223726
ENSG00000107959	rs77187733:3151863:C:T	-28058	17	18	0.0947368	1.27451e-06	-0.174979	0.0337715	0.00360366
ENSG00000120549	rs6482339:24029826:C:G	46150	27	31	0.163158	3.19516e-05	0.067442	0.0154229	0.0346982
ENSG00000120549	rs1335824:24030993:G:A	47317	27	31	0.163158	3.19516e-05	0.067442	0.0154229	0.0346982
ENSG00000120549	rs12782051:24031397:G:A	47721	27	31	0.163158	3.21455e-05	0.0674606	0.0154327	0.0348358
ENSG00000120549	rs7084832:24032196:G:A	48520	27	31	0.163158	3.19516e-05	0.067442	0.0154229	0.0346982
ENSG00000120549	rs7084972:24032294:G:A	48618	27	31	0.163158	3.19516e-05	0.067442	0.0154229	0.0346982
ENSG00000120549	rs914454:24033896:T:C	50220	27	31	0.163158	3.19516e-05	0.067442	0.0154229	0.0346982
ENSG00000120549	rs914455:24034070:G:A	50394	27	31	0.163158	3.19516e-05	0.067442	0.0154229	0.0346982
ENSG00000120549	rs11013692:24034267:G:A	50591	27	31	0.163158	3.19516e-05	0.067442	0.0154229	0.0346982
ENSG00000120549	rs11013693:24034772:G:A	51096	27	31	0.163158	3.19516e-05	0.067442	0.0154229	0.0346982
ENSG00000120549	rs11013694:24034811:A:G	51135	27	31	0.163158	3.19516e-05	0.067442	0.0154229	0.0346982
ENSG00000254635	rs2807742:28781367:G:A	-30215	35	39	0.205263	1.49323e-06	0.140096	0.0272396	0.00403803
ENSG00000254635	rs2807740:28784483:C:T	-27099	33	37	0.194737	1.42591e-06	0.140806	0.0273185	0.00391202
ENSG00000254635	rs2807738:28785408:G:C	-26174	33	37	0.194737	1.3516e-06	0.141047	0.027297	0.00375914
ENSG00000254635	rs2790430	-23788	22	23	0.121053	2.39729e-05	0.155589	0.0349785	0.0288661
ENSG00000254635	rs2790431:28789195:C:A	-22387	22	23	0.121053	2.39729e-05	0.155589	0.0349785	0.0288661
ENSG00000254635	rs2807737:28789981:C:T	-21601	34	38	0.2	1.33525e-06	0.140479	0.0271717	0.00372937
ENSG00000254635	rs2486635:28790451:G:A	-21131	38	42	0.221053	1.45037e-06	0.139616	0.0271092	0.00395547
ENSG00000254635	rs2486636:28790474:G:C	-21108	38	42	0.221053	1.42374e-06	0.139681	0.0270983	0.00390784
ENSG00000254635	rs2790460:28791022:T:A	-20560	34	38	0.2	1.28376e-06	0.140617	0.0271487	0.00362311
ENSG00000254635	rs2807735:28791584:T:C	-19998	33	36	0.189474	1.08512e-06	0.146519	0.0280695	0.00322335
ENSG00000254635	rs946594:28792247:T:C	-19335	32	35	0.184211	1.12623e-06	0.14691	0.0281926	0.00331575
ENSG00000254635	rs1416816:28792420:C:T	-19162	33	36	0.189474	1.06277e-06	0.14654	0.0280467	0.00317526
ENSG00000254635	rs1416817:28792477:A:G	-19105	32	35	0.184211	1.11788e-06	0.146932	0.028187	0.00329462
ENSG00000254635	rs9331406:28792532:GTTT:G	-19050	32	35	0.184211	1.11788e-06	0.146932	0.028187	0.00329462
ENSG00000254635	rs2998285	-18343	32	35	0.184211	1.09384e-06	0.14699	0.02817	0.00324278
ENSG00000254635	rs4237390:28793426:A:G	-18156	32	35	0.184211	1.09384e-06	0.14699	0.02817	0.00324278
ENSG00000254635	rs2486637:28794014:T:C	-17568	32	35	0.184211	1.11904e-06	0.146936	0.0281892	0.00329718
ENSG00000254635	rs2486638:28794054:G:T	-17528	33	36	0.189474	1.06444e-06	0.146538	0.0280484	0.00317855
ENSG00000254635	rs2993980:28795215:G:A	-16367	33	36	0.189474	3.83759e-06	0.139726	0.028442	0.00774547
ENSG00000254635	rs2993981:28795481:G:A	-16101	33	36	0.189474	1.10256e-06	0.146446	0.0280761	0.00326432
ENSG00000254635	rs2993982:28795488:T:C	-16094	33	36	0.189474	1.10256e-06	0.146446	0.0280761	0.00326432
ENSG00000254635	rs138279088:28795697:TTG:T	-15885	32	35	0.184211	1.17255e-06	0.146815	0.0282267	0.00340804
ENSG00000254635	rs3121059:28797312:G:C	-14270	32	35	0.184211	1.23049e-06	0.146677	0.0282631	0.00353195
ENSG00000254635	rs2993985:28799240:C:T	-12342	33	36	0.189474	1.3139e-06	0.145892	0.0281975	0.00368748
ENSG00000254635	rs5784065:28799536:T:G	-12046	31	34	0.178947	4.52256e-06	0.140514	0.0288411	0.00874265
ENSG00000254635	rs34672933:28799871:ATT:A	-11711	31	34	0.178947	4.88787e-06	0.140717	0.0289975	0.00924615
ENSG00000254635	rs2993986:28800023:C:T	-11559	31	34	0.178947	4.6966e-06	0.140364	0.0288658	0.00897862
ENSG00000254635	rs2993987:28800170:C:T	-11412	31	34	0.178947	4.75687e-06	0.140312	0.0288739	0.00907016
ENSG00000254635	rs2790447:28801342:C:T	-10240	31	34	0.178947	4.81832e-06	0.140259	0.028882	0.00914231
ENSG00000254635	rs2790448:28801757:G:A	-9825	30	33	0.173684	4.96852e-06	0.140851	0.0290496	0.00936296
ENSG00000254635	rs2993989:28801915:G:A	-9667	31	34	0.178947	4.81832e-06	0.140259	0.028882	0.00914231
ENSG00000254635	rs2807734:28801965:G:A	-9617	30	33	0.173684	4.96852e-06	0.140851	0.0290496	0.00936296
ENSG00000254635	rs2095901:28803719:A:G	-7863	30	33	0.173684	4.96852e-06	0.140851	0.0290496	0.00936296
ENSG00000254635	rs2993990:28806970:C:T	-4612	30	33	0.173684	5.03279e-06	0.140798	0.0290577	0.00944077
ENSG00000254635	rs2153300:28807970:A:G	-3612	30	33	0.173684	4.23664e-06	0.144708	0.0296035	0.00835487
ENSG00000254635	rs2185293:28808099:G:A	-3483	31	34	0.178947	4.88095e-06	0.140205	0.0288899	0.00923673
ENSG00000254635	rs2807732:28809247:C:T	-2335	31	34	0.178947	4.94479e-06	0.14015	0.0288978	0.00933165
ENSG00000254635	rs2790436:28809847:C:G	-1735	31	34	0.178947	4.94479e-06	0.14015	0.0288978	0.00933165
ENSG00000254635	rs2807730:28810378:T:C	-1204	31	34	0.178947	4.94479e-06	0.14015	0.0288978	0.00933165
ENSG00000254635	rs2486639:28811191:G:C	-391	30	33	0.173684	5.09905e-06	0.140776	0.0290728	0.00953374
ENSG00000254635	rs2993991:28812059:A:G	477	31	34	0.178947	4.94608e-06	0.140181	0.0289046	0.00933268
ENSG00000254635	rs2998283:28812066:C:T	484	31	34	0.178947	4.94608e-06	0.140181	0.0289046	0.00933268
ENSG00000254635	rs61295904:28813569:TCA:T	1987	31	34	0.178947	5.01119e-06	0.140125	0.0289124	0.00940916
ENSG00000254635	rs2993992:28814237:C:T	2655	31	34	0.178947	5.01119e-06	0.140125	0.0289124	0.00940916
ENSG00000254635	rs2491251:28814292:A:G	2710	31	34	0.178947	5.01119e-06	0.140125	0.0289124	0.00940916
ENSG00000254635	rs2807729:28815356:T:G	3774	22	23	0.121053	3.26246e-05	0.154696	0.0354209	0.0351526
ENSG00000254635	rs2807728:28815433:C:A	3851	31	34	0.178947	5.01119e-06	0.140125	0.0289124	0.00940916
ENSG00000254635	rs1339704:28816329:C:T	4747	31	34	0.178947	5.01119e-06	0.140125	0.0289124	0.00940916
ENSG00000254635	rs998362:28817058:A:G	5476	30	33	0.173684	5.23398e-06	0.140664	0.0290887	0.00973416
ENSG00000254635	rs2807763:28817631:C:G	6049	30	33	0.173684	5.30468e-06	0.140638	0.0291034	0.00983361
ENSG00000254635	rs371431907:28820021:C:CAA	8439	31	34	0.178947	5.66504e-06	0.139659	0.0289992	0.0103625
ENSG00000254635	rs72293621:28820770:TATGGAAAACGTTAGAAAGGG:T	9188	30	33	0.173684	6.0021e-06	0.14016	0.0291908	0.0108118
ENSG00000254635	rs2790442:28828526:T:C	16944	21	22	0.115789	5.43378e-05	0.153365	0.0362417	0.0493943
ENSG00000254635	rs2772435:28835463:G:A	23881	29	32	0.168421	9.46838e-06	0.138256	0.0294989	0.015085
ENSG00000254635	rs2807759:28837611:G:A	26029	29	32	0.168421	9.46838e-06	0.138256	0.0294989	0.015085
ENSG00000254635	rs332121:28841214:G:A	29632	29	32	0.168421	9.46838e-06	0.138256	0.0294989	0.015085
ENSG00000254635	rs10675987:28842192:A:ATAAT	30610	30	34	0.178947	6.00046e-07	0.149019	0.0277972	0.00210667
ENSG00000254635	rs332124:28842474:C:T	30892	29	32	0.168421	9.46838e-06	0.138256	0.0294989	0.015085
ENSG00000254635	rs11324050:28844366:AT:A	32784	29	32	0.168421	9.58497e-06	0.138199	0.0295062	0.0152426
ENSG00000254635	rs332126:28845795:G:A	34213	29	32	0.168421	9.60165e-06	0.138183	0.0295057	0.015262
ENSG00000254635	rs332128:28848328:T:A	36746	29	32	0.168421	9.60165e-06	0.138183	0.0295057	0.015262
ENSG00000254635	rs231202:28849040:A:G	37458	28	31	0.163158	7.25364e-06	0.140775	0.0296116	0.0123747
ENSG00000254635	rs332131:28853862:G:A	42280	29	32	0.168421	9.68106e-06	0.138119	0.0295051	0.0153563
ENSG00000254635	rs10717193:28854035:CT:C	42453	21	22	0.115789	5.50501e-05	0.153419	0.0362845	0.0495921
ENSG00000254635	rs332132:28854114:C:A	42532	29	32	0.168421	9.68106e-06	0.138119	0.0295051	0.0153563
ENSG00000254635	rs332134:28857374:G:A	45792	29	32	0.168421	9.81797e-06	0.138045	0.0295118	0.0155303
ENSG00000254635	rs332137:28858979:A:T	47397	29	32	0.168421	9.81797e-06	0.138045	0.0295118	0.0155303
ENSG00000254635	rs332139:28859079:C:T	47497	29	32	0.168421	9.81797e-06	0.138045	0.0295118	0.0155303
ENSG00000254635	rs332140:28859360:C:G	47778	29	32	0.168421	9.81797e-06	0.138045	0.0295118	0.0155303
ENSG00000254635	rs332142:28863955:G:A	52373	29	32	0.168421	9.95755e-06	0.137971	0.0295184	0.0156958
ENSG00000254635	rs332143:28864706:G:A	53124	29	32	0.168421	9.95755e-06	0.137971	0.0295184	0.0156958
ENSG00000254635	rs332146:28869184:T:C	57602	29	32	0.168421	1.00289e-05	0.137989	0.0295338	0.0157817
ENSG00000254635	rs332151:28874260:G:T	62678	29	32	0.168421	1.03302e-05	0.137753	0.0295307	0.0161158
ENSG00000254635	rs332152:28874531:G:A	62949	28	31	0.163158	7.78742e-06	0.140489	0.0296629	0.0130209
ENSG00000254635	rs332154:28880394:C:A	68812	28	31	0.163158	1.20926e-05	0.136825	0.0295861	0.0180069
ENSG00000254635	rs332156:28882081:G:A	70499	28	31	0.163158	1.20926e-05	0.136825	0.0295861	0.0180069
ENSG00000254635	rs332158:28884362:G:A	72780	28	31	0.163158	1.21614e-05	0.136812	0.0295925	0.0180673
ENSG00000254635	rs332161:28888840:G:C	77258	28	31	0.163158	1.22072e-05	0.136788	0.0295937	0.0181208
ENSG00000254635	rs332162:28888889:A:C	77307	28	31	0.163158	1.22072e-05	0.136788	0.0295937	0.0181208
ENSG00000254635	rs35927464:28894984:GT:G	83402	29	32	0.168421	1.22809e-05	0.13599	0.0294308	0.0181628
ENSG00000254635	rs332168:28896417:G:A	84835	28	31	0.163158	1.24457e-05	0.136709	0.0296082	0.0183392
ENSG00000254635	rs332172:28899323:T:C	87741	28	31	0.163158	1.24457e-05	0.136709	0.0296082	0.0183392
ENSG00000254635	rs71391055:28903400:G:GTCTTCTTTAAAACA	91818	28	31	0.163158	1.25049e-05	0.136713	0.0296168	0.0184023
ENSG00000254635	rs332177:28907150:T:C	95568	27	30	0.157895	9.58645e-06	0.139263	0.0297337	0.015244
ENSG00000254635	rs332178:28908174:C:A	96592	28	31	0.163158	1.27639e-05	0.13662	0.0296301	0.0186801
ENSG00000254635	rs9335815:28909299:GT:G	97717	28	31	0.163158	1.28985e-05	0.13657	0.0296366	0.0188245
ENSG00000254635	rs332181:28910116:C:T	98534	26	29	0.152632	8.29942e-06	0.141439	0.029965	0.0136847
ENSG00000254635	rs332183:28910924:G:A	99342	28	31	0.163158	1.29748e-05	0.136559	0.029644	0.0189085
ENSG00000254635	rs332186:28913603:A:G	102021	27	30	0.157895	1.01906e-05	0.138982	0.0297723	0.0159542
ENSG00000254635	rs332187:28913816:G:T	102234	28	31	0.163158	1.33534e-05	0.136425	0.0296623	0.0193402
ENSG00000254635	rs332189:28917221:G:A	105639	28	31	0.163158	1.3403e-05	0.13646	0.0296759	0.019391
ENSG00000254635	rs332191:28921125:C:A	109543	29	32	0.168421	1.60231e-05	0.135125	0.0296814	0.0218953
ENSG00000254635	rs332194:28922228:T:C	110646	29	32	0.168421	1.68263e-05	0.134716	0.0296738	0.0227182
ENSG00000254635	rs332195:28922281:G:T	110699	30	33	0.173684	1.64554e-05	0.134077	0.0294957	0.0223464
ENSG00000254635	rs332113:28923735:A:G	112153	30	33	0.173684	9.56709e-06	0.13839	0.0295441	0.0152171
ENSG00000254635	rs332114	114119	30	32	0.168421	5.10201e-05	0.131458	0.0309414	0.0473443
ENSG00000254635	rs9335824:28927593:T:TA	116011	28	30	0.157895	3.70845e-05	0.135524	0.0312733	0.0383219
ENSG00000254635	rs1034087:28932072:C:G	120490	28	30	0.157895	3.58242e-05	0.135833	0.0312785	0.0373771
ENSG00000254635	rs1272396:28932345:A:G	120763	28	30	0.157895	3.54939e-05	0.135912	0.0312791	0.0371833
ENSG00000254635	rs2772436:28933584:G:C	122002	28	30	0.157895	3.54939e-05	0.135912	0.0312791	0.0371833
ENSG00000254635	rs1755205:28933757:C:T	122175	29	31	0.163158	3.51275e-05	0.135003	0.0310505	0.0369051
ENSG00000224597	rs2768665:29679179:T:C	-19153	48	53	0.278947	5.46605e-05	-0.115438	0.0272895	0.0494037
ENSG00000224597	rs2796330:29679692:G:A	-18640	48	53	0.278947	5.14046e-05	-0.114595	0.0269852	0.0475818
ENSG00000224597	rs2182757:29683665:T:C	-14667	53	59	0.310526	1.79772e-05	0.118084	0.0261085	0.023814
ENSG00000224597	rs6481580:29686238:C:T	-12094	46	51	0.268421	1.70761e-05	0.119865	0.0264245	0.0229855
ENSG00000224597	rs34258775:29686975:T:TA	-11357	47	52	0.273684	3.6546e-05	0.116012	0.0267468	0.0379359
ENSG00000224597	rs7073366:29700392:C:T	2060	45	50	0.263158	5.15683e-05	0.113087	0.0266354	0.0476966
ENSG00000224597	rs66990059:29703250:TC:T	4918	47	52	0.273684	5.20634e-05	0.113867	0.0268353	0.0480266
ENSG00000224597	rs72201092:29704035:TAGG:T	5703	45	50	0.263158	4.33353e-05	0.114372	0.0266466	0.0424921
ENSG00000224597	rs35149222:29708885:A:AT	10553	46	51	0.268421	4.59683e-05	0.115005	0.0268924	0.0441406
ENSG00000224597	rs7081352:29714509:C:T	16177	45	50	0.263158	3.15051e-05	0.116514	0.0266222	0.0344041
ENSG00000224597	rs78111184:29715194:GAC:G	16862	45	50	0.263158	3.15051e-05	0.116514	0.0266222	0.0344041
ENSG00000224597	rs11007573:29719872:G:A	21540	47	52	0.273684	3.73539e-05	0.11614	0.0268121	0.0385152
ENSG00000224597	rs2887240:29736299:G:A	37967	45	51	0.268421	5.17887e-05	0.112625	0.0265337	0.047844
ENSG00000224597	rs10763718:29743637:C:T	45305	47	52	0.273684	3.64024e-05	0.116296	0.026806	0.0378168
ENSG00000224597	rs367876322:29744631:GCTCACTGCAACATCGGC:G	46299	47	51	0.268421	3.33561e-05	0.117193	0.0268697	0.035684
ENSG00000224597	rs149992010:29746346:C:CTGTT	48014	47	51	0.268421	3.57954e-05	0.11643	0.0268093	0.0373676
ENSG00000224597	rs10826627:29753169:C:T	54837	45	50	0.263158	2.29336e-05	0.118208	0.0265058	0.0280368
ENSG00000224597	rs3780854:29758785:G:A	60453	45	50	0.263158	1.9748e-05	0.118659	0.0263774	0.0254152
ENSG00000224597	rs6481595:29760651:T:G	62319	47	52	0.273684	2.199e-05	0.11829	0.0264595	0.0272148
ENSG00000224597	rs10826629	62982	47	53	0.278947	4.67837e-05	0.110383	0.0258399	0.0446492
ENSG00000224597	rs10740806:29764575:T:C	66243	47	53	0.278947	4.67837e-05	0.110383	0.0258399	0.0446492
ENSG00000224597	rs10826630:29764644:A:G	66312	47	53	0.278947	4.63742e-05	0.110478	0.0258481	0.0444005
ENSG00000224597	rs10826636:29772521:A:G	74189	47	52	0.273684	2.77846e-05	0.117162	0.0265699	0.0314865
ENSG00000273038	rs2490483:32711206:T:C	-464984	58	81	0.426316	2.90247e-07	0.268307	0.0485054	0.0012693
ENSG00000273038	rs2490484:32712182:G:A	-464008	58	81	0.426316	2.91042e-07	0.268232	0.0484973	0.00127212
ENSG00000273038	rs2490485:32712807:T:C	-463383	64	87	0.457895	1.22758e-06	0.267094	0.0514605	0.0035254
ENSG00000273038	rs71027085:32713475:CT:C	-462715	58	81	0.426316	2.68944e-07	0.26915	0.0485021	0.00122512
ENSG00000273038	rs2505389:32714338:T:C	-461852	67	94	0.494737	9.54199e-06	0.242165	0.0516911	0.0151843
ENSG00000273038	rs2505391:32714751:C:T	-461439	67	94	0.494737	9.54199e-06	0.242165	0.0516911	0.0151843
ENSG00000273038	rs3123649:32715874:T:C	-460316	59	83	0.436842	3.79694e-07	0.264735	0.0484092	0.00157539
ENSG00000273038	rs2505395:32719350:T:C	-456840	59	83	0.436842	3.69743e-07	0.264921	0.0483883	0.00154456
ENSG00000273038	rs2490490:32720403:A:T	-455787	58	81	0.426316	2.83662e-07	0.268341	0.0484646	0.00124665
ENSG00000273038	rs2505397:32720586:T:C	-455604	59	83	0.436842	3.70768e-07	0.264909	0.0483917	0.00154789
ENSG00000273038	rs2490493:32723273:C:A	-452917	58	81	0.426316	2.79613e-07	0.268376	0.0484417	0.0012353
ENSG00000273038	rs17575224:32723278:T:G	-452912	58	81	0.426316	2.81041e-07	0.268348	0.0484469	0.00123901
ENSG00000273038	rs2505375:32723280:T:G	-452910	58	81	0.426316	2.78866e-07	0.268433	0.0484464	0.00123281
ENSG00000273038	rs2505371:32724228:A:T	-451962	59	83	0.436842	3.66359e-07	0.264977	0.0483794	0.00153426
ENSG00000273038	rs2505370:32724872:T:G	-451318	58	81	0.426316	2.83243e-07	0.268246	0.0484444	0.00124514
ENSG00000273038	rs2490495:32726529:G:C	-449661	59	83	0.436842	3.69203e-07	0.264875	0.0483767	0.00154288
ENSG00000273038	rs2490499:32730800:A:G	-445390	59	83	0.436842	3.73551e-07	0.264686	0.0483664	0.00155623
ENSG00000273038	rs71515559:32733061:AG:A	-443129	59	83	0.436842	3.77525e-07	0.264569	0.048367	0.00156764
ENSG00000273038	rs12777053:32733063:A:T	-443127	59	83	0.436842	3.77525e-07	0.264569	0.048367	0.00156764
ENSG00000273038	rs12777221:32733064:C:T	-443126	59	83	0.436842	3.77525e-07	0.264569	0.048367	0.00156764
ENSG00000273038	rs2505403:32739150:A:T	-437040	65	91	0.478947	7.01633e-08	0.2847	0.0485965	0.000454412
ENSG00000273038	rs17575342:32741602:T:C	-434588	65	91	0.478947	7.17346e-08	0.284285	0.0485675	0.000462044
ENSG00000273038	rs2505335:32742234:A:G	-433956	59	83	0.436842	3.72997e-07	0.264001	0.0482383	0.00155429
ENSG00000273038	rs2243926:32743146:A:G	-433044	59	85	0.447368	2.36599e-06	0.243942	0.0484839	0.00560296
ENSG00000273038	rs2505340:32743328:A:G	-432862	62	85	0.447368	3.62471e-07	0.272629	0.0497539	0.00152079
ENSG00000273038	rs1520546:32748660:G:A	-427530	58	81	0.426316	2.7697e-07	0.267723	0.0483045	0.00122855
ENSG00000273038	rs2460702:32750233:G:A	-425957	58	81	0.426316	2.79237e-07	0.267616	0.0483016	0.00123397
ENSG00000273038	rs2460701:32752185:G:A	-424005	64	89	0.468421	5.73889e-08	0.286502	0.0485259	0.000389922
ENSG00000273038	rs33997704:32753424:G:GTGTT	-422766	64	89	0.468421	7.10792e-08	0.286902	0.048997	0.000458173
ENSG00000273038	rs142821488:32756359:GTTGT:G	-419831	58	81	0.426316	2.79237e-07	0.267616	0.0483016	0.00123397
ENSG00000273038	rs2460710:32759918:G:A	-416272	58	72	0.378947	1.14647e-06	0.288599	0.0554286	0.00335744
ENSG00000273038	rs944824:32764241:C:G	-411949	58	81	0.426316	2.81154e-07	0.267582	0.0483094	0.00123903
ENSG00000273038	rs2460712:32764613:C:T	-411577	58	81	0.426316	2.81154e-07	0.267582	0.0483094	0.00123903
ENSG00000273038	rs2505384:32764985:A:T	-411205	58	81	0.426316	2.81154e-07	0.267582	0.0483094	0.00123903
ENSG00000273038	rs2505385:32766852:A:G	-409338	58	81	0.426316	2.79879e-07	0.267581	0.0483001	0.001236
ENSG00000273038	rs2460711:32770015:T:G	-406175	58	81	0.426316	2.76224e-07	0.267679	0.0482911	0.00122842
ENSG00000273038	rs61856000:32771119:G:A	-405071	58	81	0.426316	2.76224e-07	0.267679	0.0482911	0.00122842
ENSG00000273038	rs74321069:32771123:TAAAA:T	-405067	58	81	0.426316	2.76224e-07	0.267679	0.0482911	0.00122842
ENSG00000273038	rs3123648:32771281:T:A	-404909	64	89	0.468421	5.69123e-08	0.286429	0.0484981	0.000387679
ENSG00000273038	rs139929745:32773331:C:T	-402859	58	81	0.426316	2.76224e-07	0.267679	0.0482911	0.00122842
ENSG00000273038	rs7098823:32777468:G:T	-398722	58	81	0.426316	2.76224e-07	0.267679	0.0482911	0.00122842
ENSG00000273038	rs953818:32778110:G:T	-398080	58	81	0.426316	2.76224e-07	0.267679	0.0482911	0.00122842
ENSG00000273038	rs35146486:32779265:CT:C	-396925	58	81	0.426316	2.76224e-07	0.267679	0.0482911	0.00122842
ENSG00000273038	rs952026:32781802:C:T	-394388	58	81	0.426316	2.76015e-07	0.267647	0.0482837	0.00122842
ENSG00000273038	rs11596240:32783569:C:T	-392621	59	82	0.431579	2.97356e-07	0.268728	0.0486311	0.00129601
ENSG00000273038	rs142701953:32783684:T:TG	-392506	58	81	0.426316	2.71158e-07	0.268026	0.048316	0.00122572
ENSG00000273038	rs11008951:32788047:G:A	-388143	58	81	0.426316	2.78288e-07	0.267538	0.0482808	0.0012309
ENSG00000273038	rs11597869:32791145:C:T	-385045	58	81	0.426316	2.78288e-07	0.267538	0.0482808	0.0012309
ENSG00000273038	rs11597882:32791192:C:T	-384998	58	81	0.426316	2.78288e-07	0.267538	0.0482808	0.0012309
ENSG00000273038	rs4486524:32793421:A:C	-382769	58	81	0.426316	2.78288e-07	0.267538	0.0482808	0.0012309
ENSG00000273038	rs11008954:32794313:A:C	-381877	58	81	0.426316	2.32376e-07	0.270971	0.0485329	0.00110486
ENSG00000273038	rs11522445:32794918:C:T	-381272	58	81	0.426316	2.78288e-07	0.267538	0.0482808	0.0012309
ENSG00000273038	rs12779002:32795079:G:A	-381111	58	81	0.426316	2.78288e-07	0.267538	0.0482808	0.0012309
ENSG00000273038	rs140718865:32795375:G:A	-380815	58	81	0.426316	2.78288e-07	0.267538	0.0482808	0.0012309
ENSG00000273038	rs61856031:32798083:T:C	-378107	58	81	0.426316	2.76999e-07	0.267586	0.0482799	0.00122855
ENSG00000273038	rs12781874:32799109:C:A	-377081	58	81	0.426316	2.76999e-07	0.267586	0.0482799	0.00122855
ENSG00000273038	rs11592015:32800714:C:T	-375476	58	81	0.426316	2.76999e-07	0.267586	0.0482799	0.00122855
ENSG00000273038	rs11596289:32800732:A:G	-375458	58	81	0.426316	2.76999e-07	0.267586	0.0482799	0.00122855
ENSG00000273038	rs11592052:32800766:G:A	-375424	58	81	0.426316	2.79155e-07	0.267527	0.048285	0.00123393
ENSG00000273038	rs12761944:32803484:G:T	-372706	58	81	0.426316	2.77855e-07	0.267587	0.0482864	0.00123019
ENSG00000273038	rs11008956:32806538:G:A	-369652	58	81	0.426316	2.77845e-07	0.267569	0.0482831	0.00123019
ENSG00000273038	rs11008958:32812620:C:T	-363570	58	81	0.426316	2.76409e-07	0.267637	0.0482848	0.00122842
ENSG00000273038	rs11008959:32812631:A:G	-363559	58	81	0.426316	2.76409e-07	0.267637	0.0482848	0.00122842
ENSG00000273038	rs35912744:32815767:C:A	-360423	58	81	0.426316	2.76409e-07	0.267637	0.0482848	0.00122842
ENSG00000273038	rs61856037:32817686:G:A	-358504	58	81	0.426316	2.89385e-07	0.267585	0.0483688	0.00126602
ENSG00000273038	rs11008962:32818749:G:A	-357441	58	81	0.426316	2.89385e-07	0.267585	0.0483688	0.00126602
ENSG00000273038	rs11524329:32818817:T:G	-357373	58	81	0.426316	2.89385e-07	0.267585	0.0483688	0.00126602
ENSG00000273038	rs1537411:32824413:G:T	-351777	58	81	0.426316	2.76409e-07	0.267637	0.0482848	0.00122842
ENSG00000273038	rs10827074:32825502:G:A	-350688	58	81	0.426316	2.76409e-07	0.267637	0.0482848	0.00122842
ENSG00000273038	rs4497290:32834571:C:T	-341619	58	81	0.426316	2.77283e-07	0.267618	0.0482878	0.00122936
ENSG00000273038	rs35668546:32837731:A:G	-338459	58	81	0.426316	2.89248e-07	0.267604	0.0483713	0.00126602
ENSG00000273038	rs12360215:32839136:C:T	-337054	58	81	0.426316	2.76277e-07	0.267703	0.0482958	0.00122842
ENSG00000273038	rs11008975:32844796:C:G	-331394	58	81	0.426316	2.75023e-07	0.267702	0.0482864	0.00122801
ENSG00000273038	rs36002530:32846168:AAT:A	-330022	58	81	0.426316	2.75907e-07	0.267683	0.0482894	0.00122842
ENSG00000273038	rs144989150:32850007:G:A	-326183	58	81	0.426316	2.88664e-07	0.267597	0.0483659	0.00126484
ENSG00000273038	rs149078236:32850434:C:A	-325756	58	81	0.426316	2.88664e-07	0.267597	0.0483659	0.00126484
ENSG00000273038	rs146743829:32851398:A:G	-324792	58	81	0.426316	2.88664e-07	0.267597	0.0483659	0.00126484
ENSG00000273038	rs143438311:32852022:G:C	-324168	58	81	0.426316	2.75712e-07	0.267649	0.048282	0.00122842
ENSG00000273038	rs12774663:32855845:A:G	-320345	58	81	0.426316	2.73494e-07	0.267732	0.0482804	0.00122572
ENSG00000273038	rs12414582:32858728:C:T	-317462	58	81	0.426316	2.74387e-07	0.267711	0.0482833	0.00122572
ENSG00000273038	rs35674897:32861271:A:T	-314919	58	81	0.426316	2.74387e-07	0.267711	0.0482833	0.00122572
ENSG00000273038	rs12146353:32861634:G:A	-314556	58	81	0.426316	2.74387e-07	0.267711	0.0482833	0.00122572
ENSG00000273038	rs11008980:32862180:C:T	-314010	58	81	0.426316	2.74387e-07	0.267711	0.0482833	0.00122572
ENSG00000273038	rs1333223:32862360:T:G	-313830	58	81	0.426316	2.74387e-07	0.267711	0.0482833	0.00122572
ENSG00000273038	rs12146257:32863171:A:G	-313019	58	81	0.426316	2.74387e-07	0.267711	0.0482833	0.00122572
ENSG00000273038	rs10508775	-311460	58	81	0.426316	2.74387e-07	0.267711	0.0482833	0.00122572
ENSG00000273038	rs12359723:32868019:C:G	-308171	58	81	0.426316	2.74387e-07	0.267711	0.0482833	0.00122572
ENSG00000273038	rs35561746:32868794:A:G	-307396	58	81	0.426316	2.74387e-07	0.267711	0.0482833	0.00122572
ENSG00000273038	rs36063520:32872823:A:G	-303367	58	81	0.426316	2.74387e-07	0.267711	0.0482833	0.00122572
ENSG00000273038	rs35538955:32874639:T:G	-301551	58	81	0.426316	2.72658e-07	0.267818	0.0482897	0.00122572
ENSG00000273038	rs34790422:32875981:T:C	-300209	58	81	0.426316	2.74387e-07	0.267711	0.0482833	0.00122572
ENSG00000273038	rs138928507:32879250:T:TAAC	-296940	58	81	0.426316	2.77192e-07	0.268119	0.0483776	0.00122912
ENSG00000273038	rs11008985:32880139:A:G	-296051	58	81	0.426316	2.74387e-07	0.267711	0.0482833	0.00122572
ENSG00000273038	rs7100338:32881544:T:C	-294646	58	81	0.426316	2.74387e-07	0.267711	0.0482833	0.00122572
ENSG00000273038	rs2484272:32882807:G:A	-293383	58	81	0.426316	2.74387e-07	0.267711	0.0482833	0.00122572
ENSG00000273038	rs1759670:32885802:A:T	-290388	58	81	0.426316	2.74387e-07	0.267711	0.0482833	0.00122572
ENSG00000273038	rs1759658:32886973:C:A	-289217	58	81	0.426316	2.74387e-07	0.267711	0.0482833	0.00122572
ENSG00000273038	rs1716013:32890225:C:T	-285965	58	81	0.426316	2.74387e-07	0.267711	0.0482833	0.00122572
ENSG00000273038	rs1762517:32890918:A:G	-285272	58	81	0.426316	2.74387e-07	0.267711	0.0482833	0.00122572
ENSG00000273038	rs2152158:32891022:A:G	-285168	58	81	0.426316	2.75076e-07	0.267768	0.0482987	0.00122801
ENSG00000273038	rs1762516:32892592:G:A	-283598	58	81	0.426316	2.75076e-07	0.267768	0.0482987	0.00122801
ENSG00000273038	rs1591395:32898243:T:C	-277947	58	81	0.426316	2.74387e-07	0.267711	0.0482833	0.00122572
ENSG00000273038	rs2460707:32899182:G:A	-277008	58	81	0.426316	2.74387e-07	0.267711	0.0482833	0.00122572
ENSG00000273038	rs61857777:32900509:T:G	-275681	58	81	0.426316	2.74953e-07	0.267772	0.0482984	0.00122801
ENSG00000273038	rs1628278:32901230:C:A	-274960	58	81	0.426316	2.74387e-07	0.267711	0.0482833	0.00122572
ENSG00000273038	rs1759661:32903978:T:A	-272212	58	81	0.426316	2.68745e-07	0.26791	0.0482771	0.00122455
ENSG00000273038	rs35917081:32905910:CTGTT:C	-270280	58	81	0.426316	2.74387e-07	0.267711	0.0482833	0.00122572
ENSG00000273038	rs1762548:32908303:T:C	-267887	58	81	0.426316	2.77701e-07	0.267818	0.048327	0.00123014
ENSG00000273038	rs1763788:32917853:C:T	-258337	58	81	0.426316	2.74387e-07	0.267711	0.0482833	0.00122572
ENSG00000273038	rs2222319:32920375:A:C	-255815	58	81	0.426316	2.74387e-07	0.267711	0.0482833	0.00122572
ENSG00000273038	rs9418007:32925854:T:C	-250336	58	81	0.426316	2.74387e-07	0.267711	0.0482833	0.00122572
ENSG00000273038	rs2992080:32928123:A:G	-248067	58	81	0.426316	2.72444e-07	0.267929	0.0483081	0.00122572
ENSG00000273038	rs9417072:32928718:G:A	-247472	58	81	0.426316	2.74387e-07	0.267711	0.0482833	0.00122572
ENSG00000273038	rs1762545:32931536:G:A	-244654	58	81	0.426316	2.74387e-07	0.267711	0.0482833	0.00122572
ENSG00000273038	rs955827:32931580:G:A	-244610	59	83	0.436842	9.17471e-07	0.256748	0.0488114	0.00284773
ENSG00000273038	rs957220:32931780:A:T	-244410	58	81	0.426316	2.74387e-07	0.267711	0.0482833	0.00122572
ENSG00000273038	rs370586132:32932949:CTCTT:C	-243241	58	81	0.426316	2.74387e-07	0.267711	0.0482833	0.00122572
ENSG00000273038	rs1591394:32933488:G:C	-242702	58	81	0.426316	2.74387e-07	0.267711	0.0482833	0.00122572
ENSG00000273038	rs1591393:32933537:A:G	-242653	58	81	0.426316	2.74387e-07	0.267711	0.0482833	0.00122572
ENSG00000273038	rs1763799:32935659:C:T	-240531	58	81	0.426316	2.74387e-07	0.267711	0.0482833	0.00122572
ENSG00000273038	rs1577372:32938382:T:C	-237808	58	81	0.426316	2.74387e-07	0.267711	0.0482833	0.00122572
ENSG00000273038	rs1335063:32941709:A:G	-234481	58	81	0.426316	2.74387e-07	0.267711	0.0482833	0.00122572
ENSG00000273038	rs1762542:32941932:C:A	-234258	58	81	0.426316	2.74387e-07	0.267711	0.0482833	0.00122572
ENSG00000273038	rs1763793:32946004:G:A	-230186	58	81	0.426316	2.74387e-07	0.267711	0.0482833	0.00122572
ENSG00000273038	rs1762539:32946262:G:A	-229928	58	81	0.426316	2.74387e-07	0.267711	0.0482833	0.00122572
ENSG00000273038	rs1763792:32946501:A:G	-229689	58	81	0.426316	2.74387e-07	0.267711	0.0482833	0.00122572
ENSG00000273038	rs1763791:32946663:G:A	-229527	58	81	0.426316	2.74387e-07	0.267711	0.0482833	0.00122572
ENSG00000273038	rs1591392:32947508:A:G	-228682	58	81	0.426316	2.74387e-07	0.267711	0.0482833	0.00122572
ENSG00000273038	rs1762536:32955446:G:A	-220744	58	81	0.426316	2.74387e-07	0.267711	0.0482833	0.00122572
ENSG00000273038	rs9418014:32955912:T:A	-220278	58	81	0.426316	4.40478e-07	0.267143	0.049163	0.00172157
ENSG00000273038	rs3003969:32956741:G:A	-219449	58	81	0.426316	4.74802e-07	0.266781	0.0492565	0.00181776
ENSG00000273038	rs1763804:32959058:T:C	-217132	58	81	0.426316	2.74387e-07	0.267711	0.0482833	0.00122572
ENSG00000273038	rs1762535:32961844:C:A	-214346	58	81	0.426316	2.74387e-07	0.267711	0.0482833	0.00122572
ENSG00000273038	rs1763800:32963423:G:A	-212767	58	81	0.426316	2.74387e-07	0.267711	0.0482833	0.00122572
ENSG00000273038	rs1762532:32963485:G:A	-212705	58	81	0.426316	2.74387e-07	0.267711	0.0482833	0.00122572
ENSG00000273038	rs1627683	-212202	58	81	0.426316	2.74387e-07	0.267711	0.0482833	0.00122572
ENSG00000273038	rs1762529:32968080:C:T	-208110	58	81	0.426316	2.74387e-07	0.267711	0.0482833	0.00122572
ENSG00000273038	rs2247648:32969237:T:G	-206953	58	81	0.426316	2.74387e-07	0.267711	0.0482833	0.00122572
ENSG00000273038	rs34351891:32969355:CT:C	-206835	60	83	0.436842	4.79803e-08	0.285684	0.0480572	0.000337078
ENSG00000273038	rs1335068:32969694:A:G	-206496	58	81	0.426316	2.74387e-07	0.267711	0.0482833	0.00122572
ENSG00000273038	rs3003972:32970997:A:T	-205193	58	81	0.426316	2.74387e-07	0.267711	0.0482833	0.00122572
ENSG00000273038	rs1335066:32976264:T:A	-199926	58	81	0.426316	2.74387e-07	0.267711	0.0482833	0.00122572
ENSG00000273038	rs2784574:32976689:G:A	-199501	58	81	0.426316	2.74387e-07	0.267711	0.0482833	0.00122572
ENSG00000273038	rs1762525:32976806:A:C	-199384	58	81	0.426316	2.74387e-07	0.267711	0.0482833	0.00122572
ENSG00000273038	rs1763785:32976853:A:G	-199337	58	81	0.426316	2.74387e-07	0.267711	0.0482833	0.00122572
ENSG00000273038	rs1763784:32978136:G:A	-198054	58	81	0.426316	2.74387e-07	0.267711	0.0482833	0.00122572
ENSG00000273038	rs1762524:32979123:T:G	-197067	58	81	0.426316	2.74387e-07	0.267711	0.0482833	0.00122572
ENSG00000273038	rs1762523:32979522:A:G	-196668	58	81	0.426316	2.74387e-07	0.267711	0.0482833	0.00122572
ENSG00000273038	rs9663199:32988698:A:C	-187492	58	81	0.426316	2.74387e-07	0.267711	0.0482833	0.00122572
ENSG00000273038	rs2266060:32991776:T:G	-184414	58	81	0.426316	2.74387e-07	0.267711	0.0482833	0.00122572
ENSG00000273038	rs75073531:32991823:G:C	-184367	58	81	0.426316	2.74387e-07	0.267711	0.0482833	0.00122572
ENSG00000273038	rs149301603:32992348:C:T	-183842	58	81	0.426316	2.74387e-07	0.267711	0.0482833	0.00122572
ENSG00000273038	rs148494172:32992393:A:C	-183797	58	81	0.426316	2.74387e-07	0.267711	0.0482833	0.00122572
ENSG00000273038	rs1762549:32993117:G:A	-183073	58	81	0.426316	2.74387e-07	0.267711	0.0482833	0.00122572
ENSG00000273038	rs2784586:32993714:G:A	-182476	59	82	0.431579	7.23266e-07	0.260929	0.0490778	0.00240564
ENSG00000273038	rs1763803:32993856:A:G	-182334	58	81	0.426316	2.74387e-07	0.267711	0.0482833	0.00122572
ENSG00000273038	rs1620702:32993986:C:T	-182204	58	81	0.426316	2.74387e-07	0.267711	0.0482833	0.00122572
ENSG00000273038	rs148327576:32997287:A:G	-178903	58	81	0.426316	2.74387e-07	0.267711	0.0482833	0.00122572
ENSG00000273038	rs1335064:32999458:C:G	-176732	58	81	0.426316	2.80731e-07	0.267571	0.0483044	0.00123829
ENSG00000273038	rs1759657:33001260:C:A	-174930	58	81	0.426316	2.74387e-07	0.267711	0.0482833	0.00122572
ENSG00000273038	rs2484719:33004255:C:G	-171935	58	81	0.426316	2.74387e-07	0.267711	0.0482833	0.00122572
ENSG00000273038	rs11009053:33008282:C:A	-167908	58	81	0.426316	2.74387e-07	0.267711	0.0482833	0.00122572
ENSG00000273038	rs1414549:33014085:A:C	-162105	67	89	0.468421	5.81316e-06	0.259019	0.0538554	0.01056
ENSG00000273038	rs7078421:33015930:A:G	-160260	58	81	0.426316	2.73543e-07	0.267777	0.0482888	0.00122572
ENSG00000273038	rs2484737:33019620:T:C	-156570	58	82	0.431579	6.60097e-07	0.257336	0.0482053	0.00227459
ENSG00000273038	rs2484736:33021290:A:G	-154900	58	81	0.426316	3.05106e-07	0.266659	0.0483091	0.00132295
ENSG00000273038	rs2484735:33025075:T:A	-151115	58	81	0.426316	2.74387e-07	0.267711	0.0482833	0.00122572
ENSG00000273038	rs144044312:33029864:AG:A	-146326	58	81	0.426316	2.74387e-07	0.267711	0.0482833	0.00122572
ENSG00000273038	rs2504336:33031238:T:C	-144952	62	83	0.436842	1.67453e-05	0.240411	0.0529405	0.0226252
ENSG00000273038	rs2484732:33036423:A:T	-139767	58	81	0.426316	2.74387e-07	0.267711	0.0482833	0.00122572
ENSG00000273038	rs2504335:33038414:A:G	-137776	64	89	0.468421	5.67363e-08	0.286314	0.0484728	0.000386736
ENSG00000273038	rs1335987:33043264:G:A	-132926	58	81	0.426316	2.74387e-07	0.267711	0.0482833	0.00122572
ENSG00000273038	rs2484730:33043772:G:A	-132418	58	81	0.426316	2.74387e-07	0.267711	0.0482833	0.00122572
ENSG00000273038	rs2484729:33043904:C:T	-132286	64	89	0.468421	5.67363e-08	0.286314	0.0484728	0.000386736
ENSG00000273038	rs2484727:33046257:C:T	-129933	58	81	0.426316	2.74387e-07	0.267711	0.0482833	0.00122572
ENSG00000273038	rs77585081:33049224:G:A	-126966	58	81	0.426316	2.74387e-07	0.267711	0.0482833	0.00122572
ENSG00000273038	rs2484725:33054771:T:A	-121419	58	81	0.426316	2.73543e-07	0.267777	0.0482888	0.00122572
ENSG00000273038	rs2504343:33057694:G:A	-118496	58	81	0.426316	2.74387e-07	0.267711	0.0482833	0.00122572
ENSG00000273038	rs2484723:33059036:A:G	-117154	57	80	0.421053	3.40024e-07	0.266854	0.0485673	0.00144278
ENSG00000273038	rs12414958:33064238:T:A	-111952	64	89	0.468421	5.66931e-08	0.286323	0.0484729	0.000386598
ENSG00000273038	rs11009078:33065845:C:T	-110345	58	81	0.426316	2.74387e-07	0.267711	0.0482833	0.00122572
ENSG00000273038	rs11009080:33066417:T:C	-109773	64	89	0.468421	5.66931e-08	0.286323	0.0484729	0.000386598
ENSG00000273038	rs11009081:33073299:C:G	-102891	58	81	0.426316	2.94037e-07	0.266491	0.0482034	0.00128354
ENSG00000273038	rs12415361:33074534:G:A	-101656	58	81	0.426316	2.74387e-07	0.267711	0.0482833	0.00122572
ENSG00000273038	rs79864102:33076213:CAA:C	-99977	58	81	0.426316	2.74387e-07	0.267711	0.0482833	0.00122572
ENSG00000273038	rs2105084:33083076:A:G	-93114	58	81	0.426316	2.74387e-07	0.267711	0.0482833	0.00122572
ENSG00000273038	rs10827130:33083457:C:T	-92733	58	81	0.426316	2.74387e-07	0.267711	0.0482833	0.00122572
ENSG00000273038	rs61856595:33086119:A:G	-90071	58	81	0.426316	2.74387e-07	0.267711	0.0482833	0.00122572
ENSG00000273038	rs201462465:33086674:G:GCCACTT	-89516	61	84	0.442105	1.30716e-07	0.279245	0.0488518	0.000720447
ENSG00000273038	rs11595142:33091567:T:C	-84623	58	81	0.426316	2.74387e-07	0.267711	0.0482833	0.00122572
ENSG00000273038	rs11009089:33094559:C:T	-81631	58	81	0.426316	2.74387e-07	0.267711	0.0482833	0.00122572
ENSG00000273038	rs11009090:33095473:A:G	-80717	64	89	0.468421	5.66931e-08	0.286323	0.0484729	0.000386598
ENSG00000273038	rs1889827:33096412:A:G	-79778	58	81	0.426316	2.74387e-07	0.267711	0.0482833	0.00122572
ENSG00000273038	rs1016433:33096802:G:A	-79388	58	81	0.426316	2.82572e-07	0.267792	0.0483576	0.00124337
ENSG00000273038	rs35923820:33099005:A:ACT	-77185	58	81	0.426316	2.74387e-07	0.267711	0.0482833	0.00122572
ENSG00000273038	rs12358460:33102972:G:A	-73218	58	81	0.426316	2.74374e-07	0.267718	0.0482845	0.00122572
ENSG00000273038	rs11009095:33103648:A:G	-72542	58	81	0.426316	2.74374e-07	0.267718	0.0482845	0.00122572
ENSG00000273038	rs10763898:33110388:G:T	-65802	58	81	0.426316	2.80717e-07	0.267578	0.0483055	0.00123829
ENSG00000273038	rs7919214:33111390:T:C	-64800	58	81	0.426316	2.80717e-07	0.267578	0.0483055	0.00123829
ENSG00000273038	rs7910732:33112887:C:A	-63303	64	89	0.468421	5.23684e-08	0.287877	0.0485881	0.000361202
ENSG00000273038	rs10827138:33113183:T:C	-63007	64	89	0.468421	5.17871e-08	0.288206	0.0486228	0.000358072
ENSG00000273038	rs12412365:33121125:G:A	-55065	58	81	0.426316	2.80717e-07	0.267578	0.0483055	0.00123829
ENSG00000273038	rs11009106:33123413:G:C	-52777	58	81	0.426316	2.80717e-07	0.267578	0.0483055	0.00123829
ENSG00000273038	rs11009107:33123774:T:C	-52416	58	81	0.426316	2.74387e-07	0.267711	0.0482833	0.00122572
ENSG00000273038	rs10827140:33124577:C:T	-51613	65	88	0.463158	4.70946e-07	-0.276459	0.0510251	0.00180628
ENSG00000273038	rs200104593:33126329:C:T	-49861	62	83	0.436842	1.7046e-05	0.240292	0.0529678	0.0229576
ENSG00000273038	rs10827141:33126842:G:A	-49348	58	81	0.426316	2.8434e-07	0.267482	0.0483143	0.00124914
ENSG00000273038	rs11009110:33128191:G:T	-47999	58	81	0.426316	2.80717e-07	0.267578	0.0483055	0.00123829
ENSG00000273038	rs11516741:33128844:A:G	-47346	58	81	0.426316	2.74387e-07	0.267711	0.0482833	0.00122572
ENSG00000273038	rs11511120:33129694:C:T	-46496	58	81	0.426316	2.80717e-07	0.267578	0.0483055	0.00123829
ENSG00000273038	rs4934747:33131103:G:A	-45087	58	81	0.426316	2.74387e-07	0.267711	0.0482833	0.00122572
ENSG00000273038	rs143895724:33132187:TATAA:T	-44003	58	81	0.426316	4.65268e-07	0.265138	0.0489099	0.00178898
ENSG00000273038	rs2995467:33135952:A:G	-40238	58	81	0.426316	2.80717e-07	0.267578	0.0483055	0.00123829
ENSG00000273038	rs3003908:33136479:C:T	-39711	58	81	0.426316	2.74387e-07	0.267711	0.0482833	0.00122572
ENSG00000273038	rs17576482:33136528:A:G	-39662	58	81	0.426316	2.74387e-07	0.267711	0.0482833	0.00122572
ENSG00000273038	rs2488294:33137515:T:G	-38675	58	81	0.426316	2.74282e-07	0.267767	0.0482927	0.00122572
ENSG00000273038	rs2504011	-38639	58	81	0.426316	2.74387e-07	0.267711	0.0482833	0.00122572
ENSG00000273038	rs2488296:33142719:A:T	-33471	58	81	0.426316	3.30045e-07	0.267218	0.048572	0.00140486
ENSG00000273038	rs2504010:33143101:T:C	-33089	58	81	0.426316	3.30045e-07	0.267218	0.048572	0.00140486
ENSG00000273038	rs2488297:33144478:C:T	-31712	58	81	0.426316	3.30045e-07	0.267218	0.048572	0.00140486
ENSG00000273038	rs9417085:33147618:G:A	-28572	58	81	0.426316	3.30045e-07	0.267218	0.048572	0.00140486
ENSG00000273038	rs2504008:33148347:G:C	-27843	58	81	0.426316	3.30045e-07	0.267218	0.048572	0.00140486
ENSG00000273038	rs2504007:33150069:T:C	-26121	58	81	0.426316	3.30045e-07	0.267218	0.048572	0.00140486
ENSG00000273038	rs2504006:33154886:A:G	-21304	58	81	0.426316	3.30045e-07	0.267218	0.048572	0.00140486
ENSG00000273038	rs2504005:33155816:G:T	-20374	58	81	0.426316	3.30045e-07	0.267218	0.048572	0.00140486
ENSG00000273038	rs2488299:33157106:T:G	-19084	58	81	0.426316	3.30045e-07	0.267218	0.048572	0.00140486
ENSG00000273038	rs9702065:33159003:C:A	-17187	58	81	0.426316	3.32519e-07	0.267358	0.0486129	0.00141361
ENSG00000273038	rs141353785:33159763:C:T	-16427	58	81	0.426316	3.36456e-07	0.267123	0.0485944	0.00142944
ENSG00000273038	rs147000546:33159910:C:T	-16280	58	81	0.426316	3.36456e-07	0.267123	0.0485944	0.00142944
ENSG00000273038	rs146638545:33160755:CA:C	-15435	58	81	0.426316	3.38656e-07	0.26709	0.0486018	0.00143752
ENSG00000273038	rs2488306:33166783:C:T	-9407	58	81	0.426316	3.50149e-07	0.266908	0.0486379	0.00147774
ENSG00000273038	rs2488307:33167994:T:A	-8196	58	81	0.426316	3.54983e-07	0.266829	0.0486519	0.00149402
ENSG00000273038	rs1342544:33168689:A:G	-7501	60	84	0.442105	1.64362e-06	0.253667	0.0495451	0.00434088
ENSG00000273038	rs1935650:33171355:A:G	-4835	61	85	0.447368	1.7097e-06	0.253402	0.0495857	0.00445911
ENSG00000273038	rs3003909:33174901:G:A	-1289	61	85	0.447368	1.7568e-06	0.253207	0.0496115	0.00454361
ENSG00000273038	rs34397571:33175321:C:CAAAG	-869	61	85	0.447368	1.76897e-06	0.253156	0.0496179	0.00456807
ENSG00000273038	rs12413584:33175619:G:C	-571	61	85	0.447368	1.76897e-06	0.253156	0.0496179	0.00456807
ENSG00000273038	rs2504014:33177950:C:G	1760	61	85	0.447368	1.8065e-06	0.252998	0.0496364	0.00463549
ENSG00000273038	rs2488311:33178417:G:A	2227	59	82	0.431579	4.23925e-07	0.264964	0.0486813	0.00166898
ENSG00000273038	rs35319185:33178523:A:AAAG	2333	59	82	0.431579	3.99095e-07	0.266062	0.048756	0.00163973
ENSG00000273038	rs67349103:33179044:GTT:G	2854	57	80	0.421053	4.16538e-07	0.264118	0.0484891	0.00166898
ENSG00000273038	rs2488312:33179729:C:T	3539	57	80	0.421053	4.18836e-07	0.264101	0.0484975	0.00166898
ENSG00000273038	rs4934608:33179849:G:A	3659	57	80	0.421053	4.18836e-07	0.264101	0.0484975	0.00166898
ENSG00000273038	rs2504015:33181945:T:C	5755	59	82	0.431579	4.15082e-07	0.265773	0.0487856	0.00166898
ENSG00000273038	rs2488313:33185433:C:T	9243	59	82	0.431579	4.66418e-07	0.264842	0.0488605	0.00179218
ENSG00000273038	rs139213078:33189599:TA:T	13409	58	81	0.426316	3.21808e-07	0.267388	0.0485507	0.00137798
ENSG00000273038	rs2488317:33195070:T:C	18880	59	82	0.431579	5.34111e-07	0.263644	0.0489279	0.00195995
ENSG00000273038	rs2488319:33196703:T:C	20513	61	85	0.447368	2.35549e-06	0.250652	0.0498067	0.0055823
ENSG00000273038	rs2504020:33201128:C:G	24938	59	82	0.431579	5.39164e-07	0.263557	0.0489319	0.00197484
ENSG00000273038	rs2488321:33201257:G:A	25067	59	82	0.431579	5.39164e-07	0.263557	0.0489319	0.00197484
ENSG00000273038	rs2995463:33202639:G:A	26449	59	82	0.431579	5.39164e-07	0.263557	0.0489319	0.00197484
ENSG00000273038	rs2488325:33204951:C:T	28761	59	82	0.431579	5.39164e-07	0.263557	0.0489319	0.00197484
ENSG00000273038	rs9418040:33206835:C:T	30645	59	82	0.431579	5.39164e-07	0.263557	0.0489319	0.00197484
ENSG00000273038	rs2252752:33211440:T:C	35250	61	85	0.447368	2.37919e-06	0.250599	0.0498204	0.00562685
ENSG00000273038	rs2503998:33217418:G:C	41228	59	82	0.431579	5.16905e-07	0.264123	0.0489465	0.00192854
ENSG00000273038	rs143341662:33218132:T:TAAAA	41942	61	85	0.447368	2.4069e-06	0.250577	0.049844	0.00567947
ENSG00000273038	rs34596235:33222097:C:CT	45907	61	85	0.447368	2.41179e-06	0.25061	0.0498555	0.00568862
ENSG00000273038	rs2245844:33224776:C:A	48586	59	82	0.431579	5.21585e-07	0.264147	0.0489703	0.00193905
ENSG00000273038	rs2457707:33227513:C:G	51323	59	82	0.431579	5.30666e-07	0.264057	0.0489907	0.00194943
ENSG00000273038	rs2750066	207249	38	46	0.242105	3.29322e-05	-0.26746	0.0612752	0.0353426
ENSG00000273038	rs2750056:33394902:T:C	218712	37	43	0.226316	2.96349e-05	-0.285984	0.065105	0.0328993
ENSG00000177283	rs7069154:36218364:G:A	291186	24	25	0.131579	3.95018e-05	0.276466	0.0640442	0.0399928
ENSG00000177283	rs12780631:36227697:G:A	300519	24	25	0.131579	4.37493e-05	0.274854	0.0640737	0.042788
ENSG00000075407	rs176838:38371899:T:A	-11366	63	81	0.426316	4.96846e-07	-0.124355	0.0230053	0.00187646
ENSG00000075407	rs2505257:38372664:A:G	-10601	64	83	0.436842	4.7269e-07	-0.123786	0.0228506	0.00181111
ENSG00000075407	rs111710158:38372924:G:GAC	-10341	65	86	0.452632	1.0676e-05	-0.10819	0.0232349	0.0165153
ENSG00000075407	rs1033669:38374346:G:A	-8919	64	83	0.436842	4.62562e-07	-0.123715	0.0228159	0.00178293
ENSG00000075407	rs2472173:38374638:G:A	-8627	64	83	0.436842	4.62562e-07	-0.123715	0.0228159	0.00178293
ENSG00000075407	rs2472174:38375382:A:G	-7883	64	83	0.436842	4.62562e-07	-0.123715	0.0228159	0.00178293
ENSG00000075407	rs2474563:38375938:T:C	-7327	64	83	0.436842	4.62562e-07	-0.123715	0.0228159	0.00178293
ENSG00000075407	rs139645413:38375992:T:TTG	-7273	65	86	0.452632	9.83889e-06	-0.108327	0.0231613	0.0155598
ENSG00000075407	rs9418322:38377296:G:T	-5969	64	83	0.436842	4.62562e-07	-0.123715	0.0228159	0.00178293
ENSG00000075407	rs9299760:38377920:C:T	-5345	64	83	0.436842	4.62562e-07	-0.123715	0.0228159	0.00178293
ENSG00000075407	rs2023351:38378814:A:G	-4451	64	83	0.436842	4.62562e-07	-0.123715	0.0228159	0.00178293
ENSG00000075407	rs9299761:38380127:C:CTG	-3138	64	83	0.436842	4.52775e-07	-0.123869	0.0228231	0.00176084
ENSG00000075407	rs35696075:38380281:GA:G	-2984	64	83	0.436842	4.52775e-07	-0.123869	0.0228231	0.00176084
ENSG00000075407	rs2474565:38380828:A:G	-2437	64	83	0.436842	4.52775e-07	-0.123869	0.0228231	0.00176084
ENSG00000075407	rs932538:38381314:T:C	-1951	65	86	0.452632	9.83889e-06	-0.108327	0.0231613	0.0155598
ENSG00000075407	rs113142948:38381415:G:GGCAAT	-1850	64	83	0.436842	4.62562e-07	-0.123715	0.0228159	0.00178293
ENSG00000075407	rs2474566:38382376:G:T	-889	64	83	0.436842	4.62562e-07	-0.123715	0.0228159	0.00178293
ENSG00000075407	rs2474567:38382492:C:T	-773	64	83	0.436842	4.62562e-07	-0.123715	0.0228159	0.00178293
ENSG00000075407	rs2472175:38382901:T:G	-364	64	83	0.436842	4.61301e-07	-0.123724	0.0228148	0.00178293
ENSG00000075407	rs2472176:38382921:T:C	-344	64	83	0.436842	4.61301e-07	-0.123724	0.0228148	0.00178293
ENSG00000075407	rs2474568:38383147:A:T	-118	64	83	0.436842	4.66241e-07	-0.123851	0.0228488	0.0017917
ENSG00000075407	rs66842526:38383280:CT:C	15	63	80	0.421053	2.85047e-07	-0.130374	0.0235515	0.0012516
ENSG00000075407	rs2983343:38383332:A:G	67	64	83	0.436842	4.64574e-07	-0.123723	0.0228217	0.00178652
ENSG00000075407	rs2474569:38383491:C:G	226	64	83	0.436842	4.61301e-07	-0.123724	0.0228148	0.00178293
ENSG00000075407	rs2504143:38383706:C:T	441	64	83	0.436842	4.60833e-07	-0.12375	0.0228186	0.00178293
ENSG00000075407	rs2504142:38383793:C:T	528	64	83	0.436842	4.61301e-07	-0.123724	0.0228148	0.00178293
ENSG00000075407	rs2472177:38384015:T:G	750	65	86	0.452632	9.81453e-06	-0.108338	0.0231603	0.0155278
ENSG00000075407	rs2474571:38384639:T:G	1374	64	83	0.436842	4.64342e-07	-0.123668	0.022811	0.00178583
ENSG00000075407	rs2472178:38384750:T:C	1485	65	86	0.452632	9.85962e-06	-0.108292	0.0231564	0.0155889
ENSG00000075407	rs2474572:38385316:A:G	2051	65	86	0.452632	9.88587e-06	-0.108254	0.0231516	0.0156128
ENSG00000075407	rs2472180:38386506:T:C	3241	64	83	0.436842	4.63536e-07	-0.123669	0.0228095	0.00178293
ENSG00000075407	rs2472181:38386764:T:C	3499	64	83	0.436842	4.63536e-07	-0.123669	0.0228095	0.00178293
ENSG00000075407	rs2474574:38387295:C:T	4030	64	83	0.436842	4.63536e-07	-0.123669	0.0228095	0.00178293
ENSG00000075407	rs2504140:38387579:T:G	4314	64	83	0.436842	4.63536e-07	-0.123669	0.0228095	0.00178293
ENSG00000075407	rs2474575:38387901:C:T	4636	64	83	0.436842	4.63536e-07	-0.123669	0.0228095	0.00178293
ENSG00000075407	rs2472182:38388865:T:C	5600	64	83	0.436842	4.63536e-07	-0.123669	0.0228095	0.00178293
ENSG00000075407	rs2384730:38389805:A:C	6540	64	83	0.436842	4.60425e-07	-0.123702	0.022809	0.00178216
ENSG00000075407	rs2263163:38389887:G:A	6622	64	83	0.436842	4.41889e-07	-0.123903	0.0228054	0.00172528
ENSG00000075407	rs2021649:38392122:C:T	8857	64	83	0.436842	4.63536e-07	-0.123669	0.0228095	0.00178293
ENSG00000075407	rs2472183:38392495:T:G	9230	64	83	0.436842	4.7617e-07	-0.123704	0.0228426	0.00182217
ENSG00000075407	rs2505198:38393183:A:C	9918	65	86	0.452632	9.88587e-06	-0.108254	0.0231516	0.0156128
ENSG00000075407	rs2505197:38393310:T:C	10045	64	83	0.436842	4.63536e-07	-0.123669	0.0228095	0.00178293
ENSG00000075407	rs2983344:38393386:G:T	10121	64	83	0.436842	4.50483e-07	-0.125587	0.0231346	0.00175375
ENSG00000075407	rs2983345:38393393:G:T	10128	64	83	0.436842	4.63536e-07	-0.123669	0.0228095	0.00178293
ENSG00000075407	rs2505196:38393563:G:A	10298	64	83	0.436842	4.63536e-07	-0.123669	0.0228095	0.00178293
ENSG00000075407	rs2505195:38393838:T:C	10573	64	83	0.436842	4.63536e-07	-0.123669	0.0228095	0.00178293
ENSG00000075407	rs2505194:38393881:C:T	10616	64	83	0.436842	4.63536e-07	-0.123669	0.0228095	0.00178293
ENSG00000075407	rs2505193:38394638:G:C	11373	64	83	0.436842	4.63536e-07	-0.123669	0.0228095	0.00178293
ENSG00000075407	rs34718983:38394900:AT:A	11635	65	86	0.452632	9.88587e-06	-0.108254	0.0231516	0.0156128
ENSG00000075407	rs2505191:38395315:G:A	12050	64	83	0.436842	4.62899e-07	-0.123817	0.0228354	0.00178293
ENSG00000075407	rs2505189:38396817:T:C	13552	64	83	0.436842	4.63536e-07	-0.123669	0.0228095	0.00178293
ENSG00000075407	rs35894133:38396903:CT:C	13638	64	83	0.436842	4.63536e-07	-0.123669	0.0228095	0.00178293
ENSG00000075407	rs2505188:38397614:T:C	14349	64	83	0.436842	4.56094e-07	-0.123882	0.0228327	0.00177089
ENSG00000075407	rs2505187:38397970:C:T	14705	64	83	0.436842	4.63536e-07	-0.123669	0.0228095	0.00178293
ENSG00000075407	rs2505186:38398029:C:T	14764	64	83	0.436842	4.63536e-07	-0.123669	0.0228095	0.00178293
ENSG00000075407	rs2474579:38398381:C:T	15116	64	83	0.436842	4.6169e-07	-0.123717	0.0228144	0.00178293
ENSG00000075407	rs2474580:38398713:G:A	15448	64	83	0.436842	4.63536e-07	-0.123669	0.0228095	0.00178293
ENSG00000075407	rs9417297:38399602:A:T	16337	64	83	0.436842	4.63536e-07	-0.123669	0.0228095	0.00178293
ENSG00000075407	rs11011452:38399848:G:A	16583	64	83	0.436842	4.63536e-07	-0.123669	0.0228095	0.00178293
ENSG00000075407	rs176877:38400154:C:A	16889	64	83	0.436842	4.63536e-07	-0.123669	0.0228095	0.00178293
ENSG00000075407	rs2504149:38400178:G:T	16913	64	83	0.436842	4.63536e-07	-0.123669	0.0228095	0.00178293
ENSG00000075407	rs2474581:38400223:A:G	16958	65	86	0.452632	9.88587e-06	-0.108254	0.0231516	0.0156128
ENSG00000075407	rs2504148:38400788:A:G	17523	64	83	0.436842	4.63536e-07	-0.123669	0.0228095	0.00178293
ENSG00000075407	rs35812511:38401075:T:TA	17810	64	83	0.436842	4.63536e-07	-0.123669	0.0228095	0.00178293
ENSG00000075407	rs176880:38401417:C:G	18152	64	83	0.436842	4.63536e-07	-0.123669	0.0228095	0.00178293
ENSG00000075407	rs176881:38401795:G:C	18530	64	83	0.436842	4.63536e-07	-0.123669	0.0228095	0.00178293
ENSG00000075407	rs176886:38403974:C:T	20709	64	83	0.436842	4.63536e-07	-0.123669	0.0228095	0.00178293
ENSG00000075407	rs176887:38406094:T:C	22829	64	83	0.436842	4.63536e-07	-0.123669	0.0228095	0.00178293
ENSG00000075407	rs75525219:38407885:G:GAAA	24620	64	83	0.436842	4.63536e-07	-0.123669	0.0228095	0.00178293
ENSG00000075407	rs1813028:38412711:A:G	29446	63	81	0.426316	2.18851e-06	-0.11774	0.0233128	0.00535503
ENSG00000075407	rs2008449:38414204:A:T	30939	65	86	0.452632	9.88587e-06	-0.108254	0.0231516	0.0156128
ENSG00000075407	rs2474584:38416389:C:T	33124	64	83	0.436842	4.63536e-07	-0.123669	0.0228095	0.00178293
ENSG00000075407	rs1548255:38417193:T:C	33928	64	83	0.436842	5.0761e-07	-0.123221	0.0228169	0.00189954
ENSG00000075407	rs2474586:38418882:T:C	35617	64	83	0.436842	4.63536e-07	-0.123669	0.0228095	0.00178293
ENSG00000075407	rs2505260:38419520:C:T	36255	64	83	0.436842	4.66826e-07	-0.123669	0.0228164	0.0017934
ENSG00000075407	rs2474587:38420666:C:T	37401	63	81	0.426316	2.18851e-06	-0.11774	0.0233128	0.00535503
ENSG00000075407	rs2474588:38420870:A:G	37605	63	81	0.426316	2.18851e-06	-0.11774	0.0233128	0.00535503
ENSG00000075407	rs2505259:38422886:G:A	39621	65	86	0.452632	9.88587e-06	-0.108254	0.0231516	0.0156128
ENSG00000075407	rs2474590:38422911:T:C	39646	64	83	0.436842	4.63536e-07	-0.123669	0.0228095	0.00178293
ENSG00000075407	rs2474594:38426661:G:C	43396	64	83	0.436842	4.63536e-07	-0.123669	0.0228095	0.00178293
ENSG00000075407	rs2474595:38426782:G:C	43517	64	83	0.436842	4.78152e-07	-0.123664	0.0228394	0.00182908
ENSG00000075407	rs2474598:38430296:T:C	47031	64	83	0.436842	4.83205e-07	-0.123562	0.0228309	0.0018449
ENSG00000075407	rs11011461:38431427:G:A	48162	64	83	0.436842	4.63536e-07	-0.123669	0.0228095	0.00178293
ENSG00000075407	rs1985707:38434098:C:T	50833	64	83	0.436842	4.60038e-07	-0.123697	0.0228071	0.00178107
ENSG00000075407	rs1854563:38434961:G:A	51696	64	83	0.436842	4.60038e-07	-0.123697	0.0228071	0.00178107
ENSG00000075407	rs2505237:38438898:T:G	55633	64	83	0.436842	4.60038e-07	-0.123697	0.0228071	0.00178107
ENSG00000075407	rs2474599:38438939:A:G	55674	64	83	0.436842	4.60038e-07	-0.123697	0.0228071	0.00178107
ENSG00000075407	rs2505240:38442419:G:T	59154	64	83	0.436842	4.5695e-07	-0.12373	0.0228066	0.00177258
ENSG00000075407	rs2505241:38442421:T:C	59156	64	83	0.436842	4.5695e-07	-0.12373	0.0228066	0.00177258
ENSG00000075407	rs2224248:38451886:A:G	68621	64	83	0.436842	4.60038e-07	-0.123697	0.0228071	0.00178107
ENSG00000075407	rs2180412:38456117:G:A	72852	64	83	0.436842	4.60038e-07	-0.123697	0.0228071	0.00178107
ENSG00000075407	rs2474608:38457109:C:T	73844	64	83	0.436842	4.60038e-07	-0.123697	0.0228071	0.00178107
ENSG00000075407	rs1998062:38457652:G:C	74387	64	83	0.436842	4.60038e-07	-0.123697	0.0228071	0.00178107
ENSG00000075407	rs2505248:38459097:A:G	75832	64	83	0.436842	4.60038e-07	-0.123697	0.0228071	0.00178107
ENSG00000075407	rs2505204:38471597:G:T	88332	63	79	0.415789	3.21335e-06	-0.119328	0.0240754	0.00684324
ENSG00000075407	rs1831315:38473353:T:C	90088	63	79	0.415789	3.23457e-06	-0.119328	0.0240832	0.00687064
ENSG00000075407	rs116205409:38478970:G:A	95705	64	81	0.426316	6.9247e-07	-0.125349	0.023531	0.00233494
ENSG00000075407	rs116912400:38479207:G:T	95942	64	81	0.426316	6.9247e-07	-0.125349	0.023531	0.00233494
ENSG00000075407	rs2505215:38481273:A:G	98008	64	81	0.426316	6.9247e-07	-0.125349	0.023531	0.00233494
ENSG00000075407	rs2505216:38482830:T:C	99565	64	81	0.426316	6.87259e-07	-0.125428	0.0235378	0.00232772
ENSG00000075407	rs2800550:38482929:T:C	99664	64	81	0.426316	6.9247e-07	-0.125349	0.023531	0.00233494
ENSG00000075407	rs1780130:38485378:T:A	102113	63	79	0.415789	3.21335e-06	-0.119328	0.0240754	0.00684324
ENSG00000075407	rs2749611:38487552:G:T	104287	65	84	0.442105	1.54318e-05	-0.108764	0.0238404	0.0213178
ENSG00000075407	rs2749612:38488610:G:A	105345	64	81	0.426316	6.9247e-07	-0.125349	0.023531	0.00233494
ENSG00000075407	rs1740732:38491385:C:T	108120	65	84	0.442105	1.54318e-05	-0.108764	0.0238404	0.0213178
ENSG00000075407	rs2103938:38493998:T:G	110733	65	84	0.442105	1.54318e-05	-0.108764	0.0238404	0.0213178
ENSG00000075407	rs1740734:38494194:T:C	110929	65	84	0.442105	1.54554e-05	-0.108835	0.0238579	0.0213377
ENSG00000075407	rs138283829:38494438:AAC:A	111173	64	81	0.426316	6.9247e-07	-0.125349	0.023531	0.00233494
ENSG00000075407	rs1621040:38497232:T:C	113967	65	84	0.442105	1.54318e-05	-0.108764	0.0238404	0.0213178
ENSG00000075407	rs1740735:38497777:A:C	114512	65	84	0.442105	1.54318e-05	-0.108764	0.0238404	0.0213178
ENSG00000075407	rs35292286:38498329:TAA:T	115064	64	81	0.426316	6.9247e-07	-0.125349	0.023531	0.00233494
ENSG00000075407	rs1740737:38499365:G:T	116100	64	81	0.426316	6.9247e-07	-0.125349	0.023531	0.00233494
ENSG00000075407	rs1780133:38499509:T:C	116244	65	84	0.442105	1.73324e-05	-0.108432	0.0239244	0.0231978
ENSG00000075407	rs1780136:38501453:A:G	118188	65	84	0.442105	1.54318e-05	-0.108764	0.0238404	0.0213178
ENSG00000075407	rs1780137:38501475:C:G	118210	64	81	0.426316	6.90409e-07	-0.125447	0.0235463	0.00233494
ENSG00000075407	rs1780138:38501654:A:G	118389	65	84	0.442105	1.54318e-05	-0.108764	0.0238404	0.0213178
ENSG00000075407	rs1614236:38502996:C:T	119731	64	81	0.426316	6.9247e-07	-0.125349	0.023531	0.00233494
ENSG00000075407	rs1780139:38503018:C:T	119753	65	84	0.442105	1.54318e-05	-0.108764	0.0238404	0.0213178
ENSG00000075407	10:38503454:CTT:C	120189	64	81	0.426316	7.2676e-07	-0.1258	0.0236666	0.0024144
ENSG00000075407	rs1780141:38504299:T:C	121034	65	84	0.442105	1.54318e-05	-0.108764	0.0238404	0.0213178
ENSG00000075407	rs1780142:38505295:G:A	122030	65	84	0.442105	1.54318e-05	-0.108764	0.0238404	0.0213178
ENSG00000075407	rs1780144:38505889:A:G	122624	64	81	0.426316	6.9247e-07	-0.125349	0.023531	0.00233494
ENSG00000075407	rs202045619:38508711:A:AT	125446	63	80	0.421053	3.95577e-06	-0.116726	0.0237965	0.00792815
ENSG00000075407	rs138811396:38508937:C:A	125672	65	84	0.442105	1.54318e-05	-0.108764	0.0238404	0.0213178
ENSG00000075407	rs142075040:38509067:A:G	125802	63	79	0.415789	3.21335e-06	-0.119328	0.0240754	0.00684324
ENSG00000075407	rs9418350:38509652:A:T	126387	65	84	0.442105	1.54318e-05	-0.108764	0.0238404	0.0213178
ENSG00000075407	rs9418351:38509905:A:G	126640	65	84	0.442105	1.54318e-05	-0.108764	0.0238404	0.0213178
ENSG00000075407	rs2749616:38510993:A:T	127728	64	81	0.426316	6.9247e-07	-0.125349	0.023531	0.00233494
ENSG00000075407	rs1740739:38512830:C:T	129565	65	84	0.442105	1.54318e-05	-0.108764	0.0238404	0.0213178
ENSG00000075407	rs1740741:38515334:C:T	132069	65	84	0.442105	1.54318e-05	-0.108764	0.0238404	0.0213178
ENSG00000075407	rs2057228:38515766:T:C	132501	65	84	0.442105	1.54318e-05	-0.108764	0.0238404	0.0213178
ENSG00000075407	rs1780146:38517874:C:A	134609	64	81	0.426316	7.07615e-07	-0.125264	0.0235377	0.00236832
ENSG00000075407	rs1740742:38518860:C:T	135595	65	84	0.442105	1.54318e-05	-0.108764	0.0238404	0.0213178
ENSG00000075407	rs71010406:38519062:A:AT	135797	65	84	0.442105	1.54318e-05	-0.108764	0.0238404	0.0213178
ENSG00000075407	rs1740743:38519222:C:T	135957	65	84	0.442105	1.54318e-05	-0.108764	0.0238404	0.0213178
ENSG00000075407	rs1740745:38520056:T:C	136791	65	84	0.442105	1.54318e-05	-0.108764	0.0238404	0.0213178
ENSG00000075407	rs1740746:38520191:T:C	136926	65	84	0.442105	1.54318e-05	-0.108764	0.0238404	0.0213178
ENSG00000075407	rs1740747:38520465:G:A	137200	65	84	0.442105	1.54857e-05	-0.108767	0.0238456	0.021369
ENSG00000075407	rs1740749:38521646:A:G	138381	65	84	0.442105	1.54318e-05	-0.108764	0.0238404	0.0213178
ENSG00000075407	rs1780148:38522516:C:G	139251	65	84	0.442105	1.54318e-05	-0.108764	0.0238404	0.0213178
ENSG00000075407	rs1780115:38524773:C:T	141508	65	84	0.442105	1.54318e-05	-0.108764	0.0238404	0.0213178
ENSG00000075407	rs1740750:38525043:G:T	141778	64	81	0.426316	6.9247e-07	-0.125349	0.023531	0.00233494
ENSG00000075407	rs34561289:38525107:CT:C	141842	64	81	0.426316	6.9247e-07	-0.125349	0.023531	0.00233494
ENSG00000075407	rs35785145:38525622:C:CTT	142357	65	84	0.442105	1.54318e-05	-0.108764	0.0238404	0.0213178
ENSG00000075407	rs1780116:38526621:C:T	143356	64	81	0.426316	6.9247e-07	-0.125349	0.023531	0.00233494
ENSG00000075407	rs1780117:38526764:C:T	143499	64	81	0.426316	6.99365e-07	-0.125565	0.023582	0.00235028
ENSG00000075407	rs1780120:38528412:C:A	145147	64	81	0.426316	6.9247e-07	-0.125349	0.023531	0.00233494
ENSG00000075407	rs1780121:38529437:C:A	146172	64	81	0.426316	6.9247e-07	-0.125349	0.023531	0.00233494
ENSG00000075407	rs1780122:38529509:C:A	146244	64	81	0.426316	6.9247e-07	-0.125349	0.023531	0.00233494
ENSG00000075407	rs2749624:38529865:A:G	146600	65	84	0.442105	1.54318e-05	-0.108764	0.0238404	0.0213178
ENSG00000075407	rs1780125:38531376:A:G	148111	65	84	0.442105	1.54318e-05	-0.108764	0.0238404	0.0213178
ENSG00000075407	rs1892142:38531751:A:C	148486	64	81	0.426316	7.28366e-07	-0.125193	0.0235547	0.00241807
ENSG00000075407	rs1780127:38533117:G:C	149852	65	84	0.442105	1.53847e-05	-0.10883	0.0238507	0.0212994
ENSG00000075407	rs2996577:38534990:C:T	151725	65	84	0.442105	1.54318e-05	-0.108764	0.0238404	0.0213178
ENSG00000075407	rs2983333:38536275:T:C	153010	65	84	0.442105	1.54318e-05	-0.108764	0.0238404	0.0213178
ENSG00000075407	rs1780145:38537070:A:G	153805	64	81	0.426316	6.9247e-07	-0.125349	0.023531	0.00233494
ENSG00000075407	rs2996628:38538072:A:T	154807	65	84	0.442105	1.54318e-05	-0.108764	0.0238404	0.0213178
ENSG00000075407	rs2800484:38542415:C:T	159150	65	84	0.442105	1.54318e-05	-0.108764	0.0238404	0.0213178
ENSG00000075407	rs2800485:38542588:G:A	159323	65	84	0.442105	1.54318e-05	-0.108764	0.0238404	0.0213178
ENSG00000075407	rs7099348:38547573:G:A	164308	65	84	0.442105	1.56657e-05	-0.108739	0.0238552	0.0215248
ENSG00000075407	rs2983338:38550734:C:T	167469	65	84	0.442105	1.54318e-05	-0.108764	0.0238404	0.0213178
ENSG00000075407	rs1980569:38559479:G:A	176214	69	88	0.463158	4.69123e-05	-0.107983	0.0252826	0.0447288
ENSG00000075407	rs200912796:38814582:A:C	431317	68	86	0.452632	4.85395e-05	-0.106974	0.0250999	0.0458058
ENSG00000243660	rs11389503:43873993:G:GA	-58290	48	60	0.315789	1.59882e-05	-0.138283	0.0303714	0.0218565
ENSG00000150165	rs7100993	520037	26	28	0.147368	1.08491e-05	0.88227	0.189643	0.0167049
ENSG00000165449	rs4948349:61405468:G:A	-5056	63	78	0.410526	2.91657e-05	0.277767	0.0631741	0.0325674
ENSG00000165449	rs10569390:61407885:CTT:C	-2639	67	82	0.431579	3.73893e-06	0.315366	0.0641104	0.00763205
ENSG00000165449	rs11006643:61407896:C:T	-2628	67	82	0.431579	3.73893e-06	0.315366	0.0641104	0.00763205
ENSG00000165449	rs10826337:61409469:G:A	-1055	61	80	0.421053	4.00804e-05	0.255646	0.0592741	0.0404194
ENSG00000165449	rs1171602:61437340:T:G	26816	61	76	0.4	2.7361e-05	0.27633	0.0626089	0.0311405
ENSG00000165449	rs1177697	28186	66	81	0.426316	2.16776e-06	0.318656	0.0630659	0.0053217
ENSG00000165449	rs11273779:61438930:CACTTGGGTAGTGTGAGAA:C	28406	66	81	0.426316	2.16776e-06	0.318656	0.0630659	0.0053217
ENSG00000165449	rs1171600:61439422:C:A	28898	66	81	0.426316	2.16326e-06	0.318768	0.0630818	0.00531336
ENSG00000165449	rs5785399:61441682:CT:C	31158	71	86	0.452632	5.81562e-06	0.32354	0.0672722	0.0105622
ENSG00000138311	rs7086545:64086524:G:A	-47428	49	60	0.315789	1.56182e-05	0.326821	0.0716855	0.0214849
ENSG00000138311	rs12249008:64092543:T:C	-41409	48	59	0.310526	2.73572e-05	0.317697	0.0719808	0.0311384
ENSG00000138311	rs12243017:64092855:G:T	-41097	48	59	0.310526	2.72582e-05	0.317905	0.0720126	0.0310655
ENSG00000138311	rs3864811:64098876:T:C	-35076	49	60	0.315789	1.54848e-05	0.326904	0.0716691	0.021369
ENSG00000138311	rs1907709:64099137:C:T	-34815	48	59	0.310526	2.72091e-05	0.317753	0.0719705	0.0310471
ENSG00000138311	rs7068108:64100181:A:C	-33771	49	60	0.315789	1.55102e-05	0.326899	0.0716746	0.0213975
ENSG00000138311	rs7087028:64103869:C:T	-30083	48	59	0.310526	2.72091e-05	0.317753	0.0719705	0.0310471
ENSG00000138311	rs7092664:64105321:G:A	-28631	49	60	0.315789	1.55102e-05	0.326899	0.0716746	0.0213975
ENSG00000138311	rs7096508:64111777:C:A	-22175	49	60	0.315789	1.53609e-05	0.326944	0.0716453	0.0212726
ENSG00000138311	rs10437344:64112690:G:A	-21262	49	60	0.315789	1.53357e-05	0.326949	0.0716398	0.0212543
ENSG00000138311	rs2087626:64118375:A:G	-15577	48	59	0.310526	2.67698e-05	0.317432	0.0718283	0.0308059
ENSG00000138311	rs10995132:64128133:G:A	-5819	48	59	0.310526	8.99531e-06	0.331553	0.0705463	0.0144951
ENSG00000138311	rs7080900	-5039	48	59	0.310526	9.4335e-06	0.330489	0.0705005	0.0150401
ENSG00000138311	rs56880293:64129516:T:A	-4436	47	58	0.305263	1.70725e-05	0.321867	0.0709556	0.0229816
ENSG00000138311	rs12263323:64131176:A:T	-2776	47	58	0.305263	1.67869e-05	0.321803	0.0708736	0.0226741
ENSG00000138311	rs3758489:64132130:G:A	-1822	48	59	0.310526	9.0929e-06	0.332066	0.0706965	0.0145972
ENSG00000138311	rs3063794:64135640:TC:T	1688	48	59	0.310526	5.84543e-06	0.339047	0.0705152	0.0105992
ENSG00000138311	rs149800343:64136710:CAG:C	2758	47	59	0.310526	1.08263e-05	0.321828	0.0691686	0.0166766
ENSG00000138311	rs4523583:64138827:G:A	4875	48	60	0.315789	6.03328e-06	0.330512	0.0688533	0.0108522
ENSG00000138311	rs3781214:64141963:T:G	8011	48	60	0.315789	6.03328e-06	0.330512	0.0688533	0.0108522
ENSG00000138311	rs7075904:64144182:C:G	10230	48	60	0.315789	6.03328e-06	0.330512	0.0688533	0.0108522
ENSG00000138311	rs2893898:64150773:C:T	16821	49	61	0.321053	5.0267e-06	0.334056	0.0689378	0.00943197
ENSG00000138311	rs10821990:64154204:G:T	20252	53	67	0.352632	1.05951e-05	-0.316972	0.0680448	0.0164182
ENSG00000204130	rs10998063:70074656:T:C	-26209	34	40	0.210526	2.10857e-05	0.0496523	0.0110793	0.0266265
ENSG00000204130	rs112264819:70075333:CA:C	-25532	36	43	0.226316	2.26192e-05	0.0488576	0.0109466	0.0277471
ENSG00000204130	rs7084597:70076490:T:C	-24375	34	40	0.210526	2.06608e-05	0.049738	0.0110854	0.0262548
ENSG00000204130	rs6480326:70077449:A:G	-23416	34	40	0.210526	2.00308e-05	0.0498684	0.0110946	0.0256605
ENSG00000204130	rs56185265:70078547:G:T	-22318	34	39	0.205263	2.90307e-05	0.0506512	0.0115167	0.032505
ENSG00000204130	rs7094618:70080681:C:A	-20184	34	39	0.205263	2.94632e-05	0.0505432	0.0115023	0.0327714
ENSG00000204130	rs56012739:70081563:G:A	-19302	33	38	0.2	3.01192e-05	0.0508074	0.0115777	0.033304
ENSG00000225383	rs9424092:10803358:G:A	-23043	43	49	0.257895	3.46668e-05	0.218689	0.0502576	0.0365808
ENSG00000225383	rs4363499	-22312	43	49	0.257895	2.55433e-05	0.220318	0.0497154	0.0298743
ENSG00000225383	rs4348805:10804220:T:G	-22181	43	49	0.257895	3.48243e-05	0.218541	0.0502376	0.0367039
ENSG00000225383	rs10752204:10804547:C:T	-21854	43	49	0.257895	3.83311e-05	0.217223	0.0502276	0.0391441
ENSG00000225383	rs977627:10804725:T:C	-21676	42	48	0.252632	3.87337e-05	0.217194	0.050253	0.0394427
ENSG00000225383	rs10795822:10804895:C:T	-21506	42	48	0.252632	3.96211e-05	0.216939	0.0502638	0.0400726
ENSG00000225383	rs2038667:10807356:T:C	-19045	42	48	0.252632	4.57641e-05	0.215513	0.050381	0.0440015
ENSG00000225383	rs9423829:10807578:T:C	-18823	42	48	0.252632	4.80934e-05	0.214817	0.0503744	0.0454944
ENSG00000225383	rs11256834	8364	31	38	0.2	5.20225e-05	0.209384	0.0493436	0.0479968
ENSG00000225383	rs11256836:10835220:T:C	8819	34	41	0.215789	1.80732e-05	0.219012	0.0484384	0.0239008
ENSG00000225383	rs2296019:10836706:A:G	10305	35	42	0.221053	3.99243e-05	0.21096	0.0489016	0.0402982
ENSG00000225383	rs59155188:10837720:A:AAAAG	11319	34	41	0.215789	2.22171e-05	0.217333	0.0486428	0.0273694
ENSG00000181192	rs9663717:12176866:C:T	65894	57	68	0.357895	2.89938e-05	-0.0607865	0.0138201	0.032469
ENSG00000181192	rs4747964:12176997:C:T	66025	56	67	0.352632	4.4381e-05	-0.0591653	0.0138049	0.0431507
ENSG00000181192	rs11257559:12179187:G:A	68215	56	67	0.352632	2.8024e-05	-0.0606474	0.0137606	0.03168
ENSG00000181192	rs35710960:12180465:A:G	69493	56	67	0.352632	2.62304e-05	-0.0607912	0.0137392	0.0303459
ENSG00000181192	rs34170068:12180569:C:A	69597	56	68	0.357895	1.19786e-05	-0.0628022	0.0135729	0.0179072
ENSG00000181192	rs12218478:12181892:C:T	70920	56	67	0.352632	2.71841e-05	-0.0606733	0.0137416	0.0310471
ENSG00000181192	rs7080938:12182446:T:C	71474	56	67	0.352632	2.68877e-05	-0.0606902	0.0137365	0.0308741
ENSG00000181192	rs35693884:12183140:G:A	72168	56	67	0.352632	2.89794e-05	-0.060481	0.0137503	0.0324583
ENSG00000181192	rs11257563:12183858:C:T	72886	56	67	0.352632	2.91628e-05	-0.0604548	0.0137495	0.0325652
ENSG00000181192	rs12777445:12187121:T:C	76149	56	67	0.352632	3.09953e-05	-0.0601895	0.0137392	0.0339981
ENSG00000181192	rs4750171:12187256:G:A	76284	56	67	0.352632	2.93568e-05	-0.0603256	0.0137256	0.0326932
ENSG00000181192	rs11594985:12188806:C:T	77834	56	67	0.352632	3.65479e-05	-0.0604802	0.0139439	0.0379359
ENSG00000181192	rs2399783:12201632:T:C	90660	56	67	0.352632	3.39057e-05	-0.0598813	0.013743	0.0361081
ENSG00000181192	rs2002024:12205964:T:A	94992	56	67	0.352632	3.86396e-05	-0.0595228	0.01377	0.0393758
ENSG00000181192	rs11972:12207508:A:G	96536	56	67	0.352632	3.86255e-05	-0.0595376	0.0137731	0.0393671
ENSG00000181192	rs4750180:12210657:G:A	99685	56	67	0.352632	3.73144e-05	-0.0597221	0.0137866	0.0384861
ENSG00000107537	rs12411977:13320555:T:C	758	50	63	0.331579	1.55171e-06	-0.116521	0.0226967	0.00416417
ENSG00000107537	rs4750340	1051	50	63	0.331579	1.15988e-06	-0.117168	0.0225154	0.00338639
ENSG00000107537	rs648173:13325946:C:T	6149	55	68	0.357895	2.87343e-05	0.104619	0.0237729	0.0322718
ENSG00000107537	rs1969817:13327703:C:T	7906	56	70	0.368421	3.66279e-06	0.113353	0.0230197	0.00752313
ENSG00000107537	rs631482:13327831:T:C	8034	56	70	0.368421	3.67154e-06	0.113358	0.0230235	0.00753393
ENSG00000107537	rs631496:13327839:A:G	8042	56	70	0.368421	3.67154e-06	0.113358	0.0230235	0.00753393
ENSG00000107537	rs500800:13328248:T:C	8451	56	70	0.368421	3.68969e-06	0.113367	0.0230309	0.00755687
ENSG00000107537	rs7920056:13334712:C:T	14915	60	79	0.415789	1.08029e-05	-0.103908	0.0223298	0.0166535
ENSG00000107537	rs7896826:13339681:C:T	19884	48	66	0.347368	4.58787e-07	-0.111998	0.0206476	0.00177827
ENSG00000107537	rs7916926:13340293:A:G	20496	50	68	0.357895	2.75471e-06	-0.105618	0.0211481	0.00623424
ENSG00000107537	rs10796054:13340339:G:A	20542	49	67	0.352632	7.35125e-07	-0.110366	0.0207736	0.00243236
ENSG00000107537	rs10906342:13340375:T:G	20578	50	68	0.357895	2.78017e-06	-0.105551	0.0211441	0.00627963
ENSG00000107537	rs3802586:13341378:C:T	21581	49	67	0.352632	9.3792e-07	-0.108963	0.0207361	0.00289122
ENSG00000107537	rs1058596:13341579:G:C	21782	49	67	0.352632	9.74919e-07	-0.108782	0.0207382	0.00297749
ENSG00000107537	rs2399959:13349398:C:T	29601	56	73	0.384211	1.8036e-05	-0.101074	0.0223516	0.0238712
ENSG00000107537	rs7914661:13351667:T:C	31870	56	73	0.384211	2.05036e-05	-0.100448	0.0223775	0.0261044
ENSG00000107537	rs72781387:13355643:G:A	35846	56	73	0.384211	1.86291e-05	-0.10168	0.0225273	0.0244082
ENSG00000107537	rs10752293:13357223:G:A	37426	56	73	0.384211	2.14136e-05	-0.100093	0.0223544	0.0268479
ENSG00000107537	rs10906347:13361421:C:T	41624	49	67	0.352632	2.44012e-06	-0.105446	0.020989	0.00573416
ENSG00000107537	rs10508459:13363046:A:T	43249	49	67	0.352632	2.44012e-06	-0.105446	0.020989	0.00573416
ENSG00000107537	rs7100588:13363440:G:A	43643	56	74	0.389474	3.87994e-05	-0.0958124	0.0221708	0.0395013
ENSG00000107537	rs10752295:13369095:G:A	49298	56	74	0.389474	4.18902e-05	-0.0954093	0.022182	0.0415958
ENSG00000107537	rs10752296	49709	56	74	0.389474	3.95109e-05	-0.0957306	0.0221766	0.0399948
ENSG00000107537	rs142642465:13372831:TTTTTTAAA:T	53034	55	72	0.378947	4.76872e-05	-0.0958957	0.0224755	0.0452301
ENSG00000107537	rs10906349:13375493:T:C	55696	56	74	0.389474	3.97656e-05	-0.0956958	0.0221773	0.0401796
ENSG00000107537	rs10906350:13375600:C:T	55803	56	74	0.389474	3.97656e-05	-0.0956958	0.0221773	0.0401796
ENSG00000107537	rs10906352:13377717:C:T	57920	57	75	0.394737	2.72686e-05	-0.0980228	0.0222048	0.0310732
ENSG00000107537	rs2275129:13378181:C:G	58384	56	74	0.389474	3.96439e-05	-0.0957013	0.0221744	0.0400884
ENSG00000107537	rs71513368:13378793:A:AAAAATG	58996	55	73	0.384211	2.50683e-05	-0.0979566	0.0220798	0.0296314
ENSG00000107537	rs3781087:13381160:T:C	61363	56	74	0.389474	4.04301e-05	-0.0955704	0.0221708	0.0406189
ENSG00000107537	rs1414399:13381835:A:C	62038	56	74	0.389474	4.03738e-05	-0.0955614	0.0221668	0.0405998
ENSG00000107537	rs138080002:13383455:G:GC	63658	56	74	0.389474	4.04451e-05	-0.0955978	0.0221777	0.0406255
ENSG00000107537	rs10906353:13383926:G:A	64129	56	74	0.389474	4.07192e-05	-0.095506	0.0221656	0.0407935
ENSG00000107537	rs10796062:13384061:C:T	64264	56	74	0.389474	4.07192e-05	-0.095506	0.0221656	0.0407935
ENSG00000107537	rs10128408:13384370:C:G	64573	56	74	0.389474	4.07192e-05	-0.095506	0.0221656	0.0407935
ENSG00000156521	rs141341437:71914266:TC:T	16528	11	11	0.0578947	1.21937e-06	0.204884	0.0394624	0.00350661
ENSG00000156521	rs7094581:71922900:C:T	25162	11	11	0.0578947	1.19792e-06	0.204578	0.0393711	0.00345724
ENSG00000079332	rs1046747:71910630:G:A	3584	45	59	0.310526	1.38773e-06	0.0593867	0.0115073	0.00383336
ENSG00000079332	rs15801	3617	51	67	0.352632	1.88165e-05	0.0522523	0.0115832	0.0245731
ENSG00000079332	rs2394643:71911014:C:T	3968	51	67	0.352632	1.88165e-05	0.0522523	0.0115832	0.0245731
ENSG00000079332	rs9971029:71916461:G:A	9415	51	67	0.352632	1.85807e-05	0.0523094	0.0115875	0.0243776
ENSG00000079332	rs9971030:71916826:C:T	9780	51	67	0.352632	1.92683e-05	0.0522924	0.0116079	0.0250147
ENSG00000079332	rs28391623:71917017:G:A	9971	51	67	0.352632	1.75268e-05	0.0525292	0.0115974	0.0233736
ENSG00000079332	rs10823489:71917181:A:C	10135	51	67	0.352632	1.85807e-05	0.0523094	0.0115875	0.0243776
ENSG00000079332	rs10823490:71919027:T:C	11981	51	67	0.352632	1.80963e-05	0.0524202	0.0115945	0.0239169
ENSG00000079332	rs10823491:71919188:G:A	12142	51	67	0.352632	1.80963e-05	0.0524202	0.0115945	0.0239169
ENSG00000079332	rs10999165:71919271:G:A	12225	51	67	0.352632	1.80963e-05	0.0524202	0.0115945	0.0239169
ENSG00000079332	rs6480443:71925446:T:C	18400	53	70	0.368421	2.60595e-05	0.0514398	0.0116213	0.0302021
ENSG00000079332	rs10159731:71926620:G:A	19574	53	69	0.363158	2.23347e-05	0.0524322	0.0117388	0.0274751
ENSG00000079332	rs12774848:71932436:T:C	25390	46	56	0.294737	5.04455e-06	0.061811	0.012758	0.00945756
ENSG00000079332	rs10999204:72007306:G:A	100260	51	63	0.331579	5.21085e-05	0.0541555	0.0127636	0.048059
ENSG00000180817	rs60609289:71966417:C:T	3830	16	17	0.0894737	1.00527e-05	-0.147076	0.0314828	0.0158088
ENSG00000180817	rs56090559:71968757:C:G	6170	16	17	0.0894737	1.00527e-05	-0.147076	0.0314828	0.0158088
ENSG00000180817	rs2244916:71969133:T:C	6546	16	17	0.0894737	1.00527e-05	-0.147076	0.0314828	0.0158088
ENSG00000180817	rs67336131:71970022:G:C	7435	17	18	0.0947368	1.01519e-05	-0.144247	0.0308938	0.0159084
ENSG00000180817	rs10999188:71970721:G:A	8134	17	18	0.0947368	1.01519e-05	-0.144247	0.0308938	0.0159084
ENSG00000180817	rs7894334:71970798:C:T	8211	16	17	0.0894737	1.00527e-05	-0.147076	0.0314828	0.0158088
ENSG00000180817	rs7914258:71971008:T:C	8421	17	18	0.0947368	1.01519e-05	-0.144247	0.0308938	0.0159084
ENSG00000180817	rs7898185:71971403:C:T	8816	16	17	0.0894737	1.00527e-05	-0.147076	0.0314828	0.0158088
ENSG00000180817	rs2151835:71972789:C:T	10202	17	18	0.0947368	1.0198e-05	-0.144217	0.0308949	0.0159613
ENSG00000180817	rs10999191:71975457:G:A	12870	17	18	0.0947368	8.57912e-06	-0.145444	0.0308682	0.0140162
ENSG00000180817	rs12220737:71975546:T:C	12959	16	17	0.0894737	1.17321e-05	-0.147622	0.0318678	0.0176695
ENSG00000180817	rs68109215:71975957:A:G	13370	17	18	0.0947368	1.0198e-05	-0.144217	0.0308949	0.0159613
ENSG00000180817	rs66526203:71975965:C:T	13378	17	18	0.0947368	1.0198e-05	-0.144217	0.0308949	0.0159613
ENSG00000180817	rs7075284:71989825:C:T	27238	16	17	0.0894737	1.1786e-05	-0.147591	0.031869	0.0177024
ENSG00000172731	rs10823524:72114553:T:C	55823	63	78	0.410526	3.90447e-06	0.228463	0.0465454	0.00785483
ENSG00000172731	rs10740339:72115305:C:T	56575	58	70	0.368421	3.17765e-06	0.233301	0.0470443	0.00678783
ENSG00000172731	rs1904585:72116994:G:A	58264	62	80	0.421053	7.32555e-07	0.229949	0.0432755	0.00242791
ENSG00000172731	rs10999292:72118370:G:T	59640	61	79	0.415789	1.09236e-06	0.225195	0.0431551	0.00323953
ENSG00000172731	rs10823529	59925	62	80	0.421053	7.46997e-07	0.229563	0.0432405	0.00246173
ENSG00000172731	rs10999295:72120030:C:T	61300	62	80	0.421053	7.07495e-07	0.230082	0.0432332	0.00236816
ENSG00000172731	rs1904592	62294	49	60	0.315789	1.09986e-05	0.217048	0.0466891	0.0168534
ENSG00000172731	rs1904591:72121041:T:C	62311	62	80	0.421053	6.84894e-07	0.230362	0.0432232	0.00232227
ENSG00000172731	rs10823530:72121144:T:A	62414	49	60	0.315789	1.09986e-05	0.217048	0.0466891	0.0168534
ENSG00000172731	rs2894122:72121391:G:T	62661	62	80	0.421053	6.62762e-07	0.23067	0.0432178	0.00228121
ENSG00000172731	rs5021129:72121415:T:C	62685	49	60	0.315789	1.08172e-05	0.217275	0.0466954	0.0166653
ENSG00000172731	rs34374557:72122492:GT:G	63762	62	80	0.421053	6.4996e-07	0.230811	0.0432068	0.00224523
ENSG00000172731	rs10762370:72122952:T:G	64222	62	80	0.421053	7.05457e-07	0.22989	0.0431916	0.00236227
ENSG00000172731	rs35685392:72126071:C:G	67341	62	80	0.421053	5.9054e-07	0.231528	0.0431578	0.00208067
ENSG00000172731	rs10999300:72126592:G:T	67862	62	80	0.421053	5.85157e-07	0.231586	0.0431511	0.00206732
ENSG00000172731	rs35209943:72129632:TC:T	70902	47	59	0.310526	1.24187e-06	0.231913	0.0447062	0.00355251
ENSG00000172731	rs10762372:72129976:C:T	71246	45	56	0.294737	8.13566e-06	0.217008	0.045926	0.0134794
ENSG00000172731	rs4746029:72130304:T:C	71574	42	52	0.273684	4.17519e-05	0.205049	0.0476627	0.0414915
ENSG00000172731	rs4747017:72130456:A:G	71726	42	52	0.273684	4.21695e-05	0.205135	0.047712	0.0417746
ENSG00000172731	rs4747018:72130518:A:G	71788	45	57	0.3	1.66222e-05	0.206193	0.0453865	0.0225158
ENSG00000172731	rs113907397:72130587:GCAACA:G	71857	57	72	0.378947	4.16752e-06	0.218278	0.0446168	0.00824947
ENSG00000172731	rs10999302:72131150:C:T	72420	42	52	0.273684	4.25644e-05	-0.20498	0.0477035	0.0419954
ENSG00000172731	rs7350394	72460	42	52	0.273684	4.21604e-05	0.204859	0.0476471	0.0417693
ENSG00000172731	rs7350395:72131256:A:T	72526	42	52	0.273684	4.21604e-05	0.204859	0.0476471	0.0417693
ENSG00000172731	rs10740340:72131625:G:A	72895	42	52	0.273684	4.27503e-05	0.20477	0.0476675	0.0421257
ENSG00000172731	rs2127582:72131827:C:T	73097	42	52	0.273684	4.51118e-05	0.204936	0.0478656	0.0436471
ENSG00000172731	rs2127583:72131888:C:T	73158	42	52	0.273684	4.27193e-05	0.204806	0.0476736	0.04211
ENSG00000172731	rs7921619:72142370:A:T	83640	57	72	0.378947	1.21363e-08	0.265256	0.0424241	0.000136005
ENSG00000172731	rs10733869:72143008:G:A	84278	38	42	0.221053	2.82787e-05	-0.246462	0.0559511	0.0319112
ENSG00000172731	rs72809242:72143217:C:G	84487	11	11	0.0578947	1.43517e-05	-0.444304	0.0969924	0.0202861
ENSG00000107731	rs10999740:72999345:G:A	27017	58	67	0.352632	4.99133e-05	0.183351	0.0430962	0.0466643
ENSG00000107731	rs879278:73001953:C:T	29625	58	67	0.352632	5.08536e-05	0.182485	0.042943	0.0472392
ENSG00000197746	rs9415996	-51688	52	69	0.363158	5.39275e-07	-0.0669217	0.0124248	0.00197485
ENSG00000197746	rs2121538	-49854	60	76	0.4	4.35607e-05	-0.0590546	0.0137631	0.042654
ENSG00000197746	rs6480555:73538896:T:A	-37160	65	85	0.447368	2.19927e-07	-0.0720064	0.0128674	0.00105952
ENSG00000197746	rs9415044:73539586:G:T	-36470	65	86	0.452632	1.47441e-07	-0.0722153	0.012695	0.000778316
ENSG00000197746	rs9415998	-36126	66	87	0.457895	1.34601e-07	-0.0723957	0.01268	0.000734886
ENSG00000197746	rs9415045:73540406:C:T	-35650	65	85	0.447368	2.04413e-07	-0.0721693	0.0128576	0.00101249
ENSG00000197746	rs9415999:73540556:A:G	-35500	65	85	0.447368	2.04413e-07	-0.0721693	0.0128576	0.00101249
ENSG00000197746	rs9415046:73540792:G:C	-35264	65	85	0.447368	2.62422e-07	-0.0712138	0.0128198	0.00120816
ENSG00000197746	rs9416000:73540973:G:A	-35083	65	85	0.447368	2.64424e-07	-0.0711839	0.0128185	0.00121141
ENSG00000197746	rs9415047	-35047	68	94	0.494737	1.14682e-05	-0.0594256	0.0128124	0.0174028
ENSG00000197746	rs9416001:73541219:C:T	-34837	65	85	0.447368	2.64424e-07	-0.0711839	0.0128185	0.00121141
ENSG00000197746	rs9416002:73541427:T:C	-34629	68	94	0.494737	1.14682e-05	-0.0594256	0.0128124	0.0174028
ENSG00000197746	rs7899470:73541969:G:A	-34087	65	85	0.447368	2.64424e-07	-0.0711839	0.0128185	0.00121141
ENSG00000197746	rs9416003:73542029:T:C	-34027	65	85	0.447368	2.64424e-07	-0.0711839	0.0128185	0.00121141
ENSG00000197746	rs9415048:73542210:C:G	-33846	65	85	0.447368	2.64424e-07	-0.0711839	0.0128185	0.00121141
ENSG00000197746	rs9415049:73542342:A:G	-33714	65	85	0.447368	2.64424e-07	-0.0711839	0.0128185	0.00121141
ENSG00000197746	rs10823844:73542839:T:C	-33217	65	85	0.447368	2.64424e-07	-0.0711839	0.0128185	0.00121141
ENSG00000197746	rs9299508:73543453:C:T	-32603	65	85	0.447368	2.64424e-07	-0.0711839	0.0128185	0.00121141
ENSG00000197746	rs3802709:73545236:G:T	-30820	65	85	0.447368	2.59395e-07	-0.0713209	0.0128329	0.00119651
ENSG00000197746	rs9416005:73546942:C:T	-29114	65	85	0.447368	2.48642e-07	-0.0716561	0.0128704	0.00115514
ENSG00000197746	rs9416007:73547962:G:A	-28094	65	85	0.447368	2.4343e-07	-0.0718715	0.0128977	0.00113641
ENSG00000197746	rs11592462:73550117:C:G	-25939	69	95	0.5	1.15597e-05	-0.0598973	0.0129197	0.0174873
ENSG00000197746	rs60173750:73566330:GCT:G	-9726	65	90	0.473684	2.49566e-05	-0.0579175	0.0130514	0.0295712
ENSG00000197746	rs9415051:73566778:G:A	-9278	65	90	0.473684	2.49566e-05	-0.0579175	0.0130514	0.0295712
ENSG00000197746	rs9415053:73575910:G:C	-146	66	91	0.478947	4.39445e-05	-0.0568016	0.0132452	0.0428626
ENSG00000197746	rs9415054:73577626:A:T	1570	66	91	0.478947	4.30853e-05	-0.0568651	0.0132438	0.0423456
ENSG00000197746	rs142614739:73578704:AAGTCTC:A	2648	66	91	0.478947	4.35327e-05	-0.056859	0.0132508	0.0426398
ENSG00000197746	rs9416009:73581076:C:A	5020	66	91	0.478947	4.47434e-05	-0.056797	0.013259	0.0433691
ENSG00000197746	rs762571:73594499:G:A	18443	61	79	0.415789	4.64046e-05	-0.0576936	0.0134989	0.044422
ENSG00000197746	rs2854987:73595823:T:C	19767	46	51	0.268421	5.36736e-05	-0.0697717	0.016475	0.0490114
ENSG00000197746	rs3061818:73598192:C:CAT	22136	62	80	0.421053	3.40776e-05	-0.0592519	0.0136027	0.0361604
ENSG00000197746	rs28535035:73599428:C:T	23372	62	80	0.421053	3.40776e-05	-0.0592519	0.0136027	0.0361604
ENSG00000197746	rs4747206:73600956:A:G	24900	62	80	0.421053	3.43631e-05	-0.0592581	0.013611	0.0363469
ENSG00000197746	rs9663508:73602452:T:C	26396	62	80	0.421053	3.43631e-05	-0.0592581	0.013611	0.0363469
ENSG00000197746	rs11596365:73604537:A:G	28481	62	80	0.421053	3.57905e-05	-0.0591494	0.0136197	0.0373676
ENSG00000197746	rs7922255:73605490:A:G	29434	62	80	0.421053	3.43631e-05	-0.0592581	0.013611	0.0363469
ENSG00000197746	rs4747208:73607210:T:C	31154	62	80	0.421053	3.18428e-05	-0.0597258	0.0136555	0.0346292
ENSG00000197746	rs4237332:73607325:C:T	31269	62	80	0.421053	3.18387e-05	-0.0597466	0.0136601	0.0346259
ENSG00000166348	rs36107511:74830950:CAA:C	-426347	16	18	0.0947368	1.80912e-05	0.109951	0.024319	0.0239142
ENSG00000151208	rs10824576:79566040:G:C	15490	46	61	0.321053	4.65666e-05	0.0638379	0.0149398	0.0445117
ENSG00000151208	rs55893027:79588209:C:T	37659	44	60	0.315789	5.49705e-05	0.061781	0.0146102	0.0495409
ENSG00000225484	rs372096578:81638450:T:A	74636	20	20	0.105263	2.75358e-05	-0.231746	0.0525272	0.0312582
ENSG00000225484	rs12763012:81641198:T:C	77384	20	20	0.105263	2.70776e-05	-0.23153	0.0524261	0.030996
ENSG00000225484	rs71481530:81643234:A:C	79420	20	20	0.105263	2.70776e-05	-0.23153	0.0524261	0.030996
ENSG00000225484	rs61860459:81758307:C:T	194493	24	26	0.136842	7.14361e-06	-0.200922	0.0422292	0.0122446
ENSG00000225484	rs7916423:81865187:A:G	301373	69	89	0.468421	5.27426e-05	-0.128075	0.0302083	0.0484448
ENSG00000225484	rs7893184:81866621:A:G	302807	69	89	0.468421	5.13865e-05	-0.128531	0.0302661	0.0475723
ENSG00000225484	rs6584985:81866674:T:C	302860	69	89	0.468421	5.13865e-05	-0.128531	0.0302661	0.0475723
ENSG00000225484	rs7901488:81867619:T:C	303805	69	89	0.468421	5.35972e-05	-0.127973	0.0302151	0.0489708
ENSG00000225484	rs10887515:81869957:C:A	306143	69	89	0.468421	5.49201e-05	-0.127816	0.0302248	0.0495264
ENSG00000148680	rs7914755:92446898:C:A	-53681	39	44	0.231579	8.20615e-07	0.157608	0.0298126	0.00263123
ENSG00000148680	rs7923597:92448753:G:A	-51826	42	48	0.252632	8.11263e-07	0.154203	0.0291535	0.0026062
ENSG00000148680	rs11186272:92449737:C:T	-50842	42	48	0.252632	8.0131e-07	0.154169	0.0291309	0.00258148
ENSG00000148680	rs77619491:92451551:G:C	-49028	21	22	0.115789	4.26831e-05	0.180889	0.0421043	0.0420829
ENSG00000148680	rs7913197:92451763:A:C	-48816	42	48	0.252632	7.77304e-07	0.154013	0.0290617	0.00253042
ENSG00000148680	rs7913555:92451840:G:A	-48739	39	44	0.231579	6.95553e-07	0.159207	0.0298929	0.00234027
ENSG00000148680	rs61020448:92452060:C:CAGTT	-48519	39	44	0.231579	6.95553e-07	0.159207	0.0298929	0.00234027
ENSG00000148680	rs7913631:92452133:A:G	-48446	42	48	0.252632	7.90939e-07	0.153994	0.0290808	0.00255676
ENSG00000148680	rs12248435:92453475:T:G	-47104	39	44	0.231579	6.99084e-07	0.159198	0.0298978	0.0023497
ENSG00000148680	rs59886855:92453956:A:C	-46623	39	44	0.231579	7.15925e-07	0.159004	0.0298933	0.00238962
ENSG00000148680	rs61048088:92454173:A:G	-46406	42	48	0.252632	7.73091e-07	0.153812	0.0290166	0.00252067
ENSG00000148680	rs7899936:92455763:G:A	-44816	42	48	0.252632	7.77829e-07	0.153759	0.0290146	0.0025309
ENSG00000148680	rs7916485:92455891:T:C	-44688	39	44	0.231579	7.20831e-07	0.158942	0.0298908	0.0023992
ENSG00000148680	rs7900519:92456239:G:A	-44340	42	48	0.252632	7.77829e-07	0.153759	0.0290146	0.0025309
ENSG00000148680	rs74148818:92456528:C:G	-44051	42	48	0.252632	7.77759e-07	0.153801	0.0290224	0.0025309
ENSG00000148680	rs74148819:92456553:G:A	-44026	42	48	0.252632	7.77829e-07	0.153759	0.0290146	0.0025309
ENSG00000148680	rs17525184:92456589:C:T	-43990	39	44	0.231579	7.20831e-07	0.158942	0.0298908	0.0023992
ENSG00000148680	rs17098924	-43912	42	48	0.252632	7.70226e-07	0.153768	0.0290036	0.00251515
ENSG00000148680	rs11186275:92456882:G:T	-43697	42	48	0.252632	7.70226e-07	0.153768	0.0290036	0.00251515
ENSG00000148680	rs12256617:92457187:T:G	-43392	42	48	0.252632	7.70226e-07	0.153768	0.0290036	0.00251515
ENSG00000148680	rs1892110	-43333	42	49	0.257895	1.19369e-06	0.147395	0.0283616	0.00345432
ENSG00000148680	rs12265378:92457889:A:C	-42690	39	44	0.231579	7.25828e-07	0.15888	0.0298882	0.00241178
ENSG00000148680	rs11186276:92458193:T:G	-42386	42	48	0.252632	7.35708e-07	0.15419	0.0290234	0.00243381
ENSG00000148680	rs138473882:92462785:CCAAA:C	-37794	21	22	0.115789	4.26831e-05	0.180889	0.0421043	0.0420829
ENSG00000148680	rs10600603:92467130:GCTCT:G	-33449	39	44	0.231579	7.25828e-07	0.15888	0.0298882	0.00241178
ENSG00000148680	rs76733605:92470017:T:C	-30562	21	22	0.115789	4.30355e-05	0.180793	0.0421034	0.0423078
ENSG00000148680	rs12259754:92472510:G:T	-28069	39	44	0.231579	7.1764e-07	0.159027	0.0299007	0.00239378
ENSG00000148680	rs12244858:92472559:A:G	-28020	39	44	0.231579	7.25828e-07	0.15888	0.0298882	0.00241178
ENSG00000148680	rs79972388:92472622:G:C	-27957	21	22	0.115789	4.30355e-05	0.180793	0.0421034	0.0423078
ENSG00000148680	rs11186283:92474125:C:T	-26454	39	44	0.231579	7.25828e-07	0.15888	0.0298882	0.00241178
ENSG00000148680	rs11186284:92475435:G:A	-25144	39	44	0.231579	7.25828e-07	0.15888	0.0298882	0.00241178
ENSG00000148680	rs11186286	-23503	40	46	0.242105	4.4134e-07	0.156722	0.0288443	0.00172374
ENSG00000148680	rs7071656:92477634:C:A	-22945	40	46	0.242105	4.4134e-07	0.156722	0.0288443	0.00172374
ENSG00000148680	rs7072840:92478283:G:T	-22296	39	44	0.231579	7.19471e-07	0.158953	0.0298902	0.00239823
ENSG00000148680	rs7095540:92479410:T:G	-21169	40	46	0.242105	4.93341e-07	0.156401	0.0289249	0.00187646
ENSG00000148680	rs7098983:92479509:T:A	-21070	39	44	0.231579	6.81419e-07	0.158874	0.0298032	0.00231235
ENSG00000148680	rs2800134:92480047:T:C	-20532	61	80	0.421053	4.60828e-05	-0.108677	0.0254167	0.0441948
ENSG00000148680	rs7071278:92483401:A:T	-17178	39	44	0.231579	7.97362e-07	0.158725	0.0299851	0.00257242
ENSG00000148680	rs59372295:92489744:G:A	-10835	43	51	0.268421	1.94372e-06	0.14155	0.0278682	0.00490544
ENSG00000148680	rs56972023:92490703:C:T	-9876	44	52	0.273684	1.32098e-06	0.143733	0.0277871	0.00370118
ENSG00000148680	rs77198958:92491963:T:C	-8616	21	22	0.115789	4.28055e-05	0.180937	0.0421228	0.0421321
ENSG00000148680	rs57830765:92495343:ATACTTAGT:A	-5236	43	51	0.268421	1.76318e-06	0.14183	0.027794	0.00455626
ENSG00000148680	rs76021388:92497907:T:C	-2672	21	22	0.115789	4.28055e-05	0.180937	0.0421228	0.0421321
ENSG00000148680	rs11817364:92498026:G:A	-2553	43	51	0.268421	1.06536e-06	0.144445	0.0276488	0.00317961
ENSG00000148680	rs11432480:92502858:T:TA	2279	43	51	0.268421	1.06536e-06	0.144445	0.0276488	0.00317961
ENSG00000148680	rs11812708:92505265:T:C	4686	42	50	0.263158	1.56029e-06	0.142358	0.0277367	0.00417667
ENSG00000148680	rs57768581:92507378:A:C	6799	42	50	0.263158	1.56029e-06	0.142358	0.0277367	0.00417667
ENSG00000148680	rs56662980:92518358:A:C	17779	42	50	0.263158	1.54975e-06	0.14241	0.0277379	0.00415949
ENSG00000148680	rs58132737:92519178:C:T	18599	42	50	0.263158	1.54975e-06	0.14241	0.0277379	0.00415949
ENSG00000148680	rs59371013:92519356:G:A	18777	42	50	0.263158	1.54975e-06	0.14241	0.0277379	0.00415949
ENSG00000148680	rs7912164:92519954:T:C	19375	42	50	0.263158	1.54975e-06	0.14241	0.0277379	0.00415949
ENSG00000148680	rs74701947:92520832:T:C	20253	42	50	0.263158	1.54789e-06	0.142435	0.0277412	0.00415645
ENSG00000148680	rs34059202:92523177:C:CT	22598	42	50	0.263158	1.54789e-06	0.142435	0.0277412	0.00415645
ENSG00000148680	rs11817665:92524640:T:C	24061	42	50	0.263158	1.54613e-06	0.142459	0.0277445	0.00415474
ENSG00000148680	rs35382478:92525281:A:AT	24702	44	52	0.273684	5.17743e-07	0.149108	0.0276342	0.00193044
ENSG00000148680	rs4262637:92526004:T:C	25425	42	50	0.263158	1.53803e-06	0.142504	0.0277462	0.00413703
ENSG00000148680	rs11315830:92528003:CA:C	27424	42	50	0.263158	1.52609e-06	0.142578	0.0277506	0.00411171
ENSG00000148680	rs7907728:92528179:A:T	27600	42	50	0.263158	1.52609e-06	0.142578	0.0277506	0.00411171
ENSG00000148680	rs7072526:92529270:T:C	28691	42	50	0.263158	1.52609e-06	0.142578	0.0277506	0.00411171
ENSG00000148680	rs60226639:92529829:A:G	29250	44	53	0.278947	5.73483e-07	0.144443	0.02689	0.00204128
ENSG00000148680	rs4933606:92531394:A:G	30815	42	50	0.263158	1.52609e-06	0.142578	0.0277506	0.00411171
ENSG00000148680	rs60873034:92531691:G:A	31112	44	53	0.278947	6.53597e-07	0.144043	0.026971	0.00225496
ENSG00000148680	rs35209059:92533216:TACAA:T	32637	42	50	0.263158	1.31161e-06	0.143745	0.0277802	0.00368166
ENSG00000148680	rs7086484:92533729:G:A	33150	49	59	0.310526	2.82864e-07	0.14696	0.0265391	0.00124412
ENSG00000148680	rs7091039:92534755:A:T	34176	43	51	0.268421	1.23051e-06	0.144827	0.0279065	0.00353195
ENSG00000148680	rs35731601:92536643:A:AG	36064	43	51	0.268421	1.337e-06	0.144021	0.0278585	0.0037322
ENSG00000148680	rs79778749:92537399:T:C	36820	45	54	0.284211	4.71316e-07	0.146373	0.0270165	0.00180749
ENSG00000148680	rs36101610:92540879:C:A	40300	46	55	0.289474	6.48317e-07	0.144853	0.0271128	0.00224065
ENSG00000148680	rs78472578:92542241:T:C	41662	48	59	0.310526	1.1981e-06	0.136183	0.0262087	0.00345724
ENSG00000148680	rs4933607:92545069:G:A	44490	46	55	0.289474	6.53106e-07	0.144758	0.027104	0.0022535
ENSG00000148680	rs12412496:92546165:G:A	45586	46	55	0.289474	6.53106e-07	0.144758	0.027104	0.0022535
ENSG00000148680	rs12413941:92546406:T:C	45827	48	59	0.310526	1.20383e-06	0.136123	0.0262029	0.00347021
ENSG00000148680	rs7090415:92547308:G:A	46729	48	59	0.310526	1.20383e-06	0.136123	0.0262029	0.00347021
ENSG00000148680	rs35731058:92549295:G:A	48716	46	55	0.289474	7.81799e-07	0.143532	0.0270909	0.00253769
ENSG00000148680	rs4272713:92549972:A:G	49393	46	55	0.289474	7.81799e-07	0.143532	0.0270909	0.00253769
ENSG00000148680	rs11472590:92553215:T:TTA	52636	58	73	0.384211	3.10723e-07	0.138845	0.0251732	0.00134201
ENSG00000148680	rs111685246:92556445:C:T	55866	20	21	0.110526	4.67245e-05	0.180617	0.042278	0.0446145
ENSG00000148680	rs4933608:92559787:C:T	59208	46	55	0.289474	7.81799e-07	0.143532	0.0270909	0.00253769
ENSG00000148680	rs7916403	59329	66	92	0.484211	2.30115e-05	0.108084	0.0242406	0.0280963
ENSG00000148680	rs34457518:92559959:T:TG	59380	47	58	0.305263	2.09787e-06	0.132799	0.0262411	0.00519364
ENSG00000148680	rs12785051:92560328:T:A	59749	46	55	0.289474	7.81799e-07	0.143532	0.0270909	0.00253769
ENSG00000148680	rs12783703:92560413:A:G	59834	50	62	0.326316	6.35149e-07	0.137141	0.025646	0.00220442
ENSG00000148680	rs12764938:92560714:C:T	60135	46	55	0.289474	7.81799e-07	0.143532	0.0270909	0.00253769
ENSG00000148680	rs35598406:92561300:C:A	60721	47	58	0.305263	2.09787e-06	0.132799	0.0262411	0.00519364
ENSG00000148680	rs11186309	60978	47	58	0.305263	2.09787e-06	0.132799	0.0262411	0.00519364
ENSG00000148680	rs1418214:92562377:C:A	61798	46	55	0.289474	7.81799e-07	0.143532	0.0270909	0.00253769
ENSG00000148680	rs12766851:92562831:C:T	62252	46	55	0.289474	7.81799e-07	0.143532	0.0270909	0.00253769
ENSG00000148680	rs7090941:92563148:C:T	62569	48	59	0.310526	1.39974e-06	0.135153	0.0261991	0.00385957
ENSG00000148680	rs7075333:92563400:T:C	62821	47	58	0.305263	2.09787e-06	0.132799	0.0262411	0.00519364
ENSG00000148680	rs11594548:92564191:G:A	63612	47	58	0.305263	2.09787e-06	0.132799	0.0262411	0.00519364
ENSG00000148680	rs1573935:92564827:A:G	64248	68	93	0.489474	1.57301e-05	0.113736	0.0249571	0.0215869
ENSG00000148680	rs1935351:92565725:C:T	65146	47	58	0.305263	2.09787e-06	0.132799	0.0262411	0.00519364
ENSG00000148680	rs4350278:92566137:C:A	65558	47	58	0.305263	2.06269e-06	0.132917	0.0262432	0.0051315
ENSG00000148680	rs4350279:92566171:C:T	65592	46	55	0.289474	7.58769e-07	0.143764	0.0270983	0.00249102
ENSG00000148680	rs2185708:92566370:A:G	65791	47	58	0.305263	2.02587e-06	0.133039	0.0262446	0.00505928
ENSG00000148680	rs2185707:92566379:T:A	65800	47	58	0.305263	2.02587e-06	0.133039	0.0262446	0.00505928
ENSG00000148680	rs58868307:92567156:C:A	66577	46	55	0.289474	5.92544e-07	0.144638	0.0269651	0.00208707
ENSG00000148680	rs57825126:92567360:A:C	66781	48	59	0.310526	1.24522e-06	0.135927	0.0262062	0.0035605
ENSG00000148680	rs60748043:92567528:C:T	66949	47	58	0.305263	1.85985e-06	0.133607	0.0262491	0.00474097
ENSG00000148680	rs148617174:92567718:A:G	67139	47	58	0.305263	1.83268e-06	0.133703	0.0262495	0.00468539
ENSG00000148680	rs60135579:92567802:G:A	67223	47	58	0.305263	1.82413e-06	0.133733	0.0262495	0.00467042
ENSG00000148680	rs61218433:92567814:A:G	67235	48	59	0.310526	1.29828e-06	0.135977	0.0262666	0.00365429
ENSG00000148680	rs115780035:92567859:C:T	67280	47	58	0.305263	1.81218e-06	0.133807	0.0262559	0.00464618
ENSG00000148680	rs59277098:92568031:T:C	67452	48	59	0.310526	1.11071e-06	0.136135	0.026108	0.00327926
ENSG00000148680	rs12777727:92568293:A:G	67714	47	58	0.305263	1.77217e-06	0.133911	0.0262484	0.00457599
ENSG00000148680	rs12777881:92568294:C:T	67715	48	59	0.310526	3.4945e-06	0.13092	0.0265248	0.00728541
ENSG00000148680	rs12779377:92568349:T:C	67770	48	59	0.310526	1.17354e-06	0.136287	0.0262035	0.00340886
ENSG00000148680	rs12779610:92568463:T:C	67884	47	58	0.305263	1.74806e-06	0.133996	0.0262481	0.0045315
ENSG00000148680	rs12784621:92568534:T:C	67955	47	58	0.305263	1.73949e-06	0.134028	0.0262481	0.00451479
ENSG00000148680	rs12784014:92568957:C:T	68378	47	58	0.305263	1.70189e-06	0.134153	0.0262454	0.00444977
ENSG00000148680	rs12761148:92568958:T:C	68379	47	58	0.305263	1.69503e-06	0.134176	0.0262449	0.00443697
ENSG00000148680	rs11817810:92569442:C:T	68863	45	54	0.284211	6.18897e-07	0.144857	0.0270579	0.00216024
ENSG00000148680	rs149005609:92569534:A:G	68955	48	59	0.310526	1.09179e-06	0.136678	0.0261915	0.00323898
ENSG00000148680	rs138704692:92569757:C:T	69178	45	54	0.284211	6.08797e-07	0.144952	0.027056	0.00213349
ENSG00000148680	rs201425777:92570266:T:TC	69687	47	58	0.305263	1.5753e-06	0.134582	0.0262333	0.00419452
ENSG00000148680	rs138692846:92570359:A:G	69780	47	58	0.305263	1.57455e-06	0.134561	0.0262288	0.00419452
ENSG00000148680	rs114817649:92570549:G:A	69970	47	58	0.305263	1.56286e-06	0.134601	0.0262273	0.00417812
ENSG00000148680	rs117438935:92570857:A:C	70278	48	59	0.310526	1.02426e-06	0.136999	0.0261763	0.00308896
ENSG00000148680	rs141748886:92571019:T:G	70440	45	54	0.284211	5.8027e-07	0.145084	0.0270233	0.00205329
ENSG00000148680	rs4933613:92571389:A:G	70810	46	57	0.3	1.50902e-06	0.134753	0.0262137	0.00407517
ENSG00000148680	rs7078682:92572494:C:A	71915	46	57	0.3	1.44923e-06	0.134882	0.026189	0.00395343
ENSG00000148680	rs7096934:92572748:T:C	72169	44	53	0.278947	5.54697e-07	0.145077	0.0269685	0.00201782
ENSG00000148680	rs7079267:92572858:C:A	72279	47	58	0.305263	9.53761e-07	0.137198	0.0261292	0.00292427
ENSG00000148680	rs7079426:92572981:C:A	72402	46	57	0.3	1.42757e-06	0.134904	0.0261749	0.00391293
ENSG00000148680	rs146659870:92573004:G:A	72425	19	20	0.105263	2.61152e-05	0.18913	0.0427336	0.0302573
ENSG00000148680	rs11813240:92573136:A:G	72557	46	57	0.3	1.41785e-06	0.13492	0.0261697	0.00390089
ENSG00000148680	rs58586220:92573318:G:A	72739	44	53	0.278947	5.49504e-07	0.145013	0.0269456	0.00200204
ENSG00000148680	rs58460916:92573523:C:T	72944	47	58	0.305263	9.36978e-07	0.137208	0.0261101	0.00288885
ENSG00000148680	rs35449520:92573702:T:A	73123	46	57	0.3	1.40074e-06	0.134914	0.0261535	0.00386138
ENSG00000148680	rs4933195:92574239:T:A	73660	46	57	0.3	1.38679e-06	0.134886	0.026136	0.00383171
ENSG00000148680	rs60659958:92574841:GT:G	74262	46	57	0.3	1.37812e-06	0.13492	0.026135	0.00381893
ENSG00000148680	rs12263520:92574986:G:T	74407	65	90	0.473684	1.193e-05	0.11272	0.0243557	0.0178598
ENSG00000148680	rs71479062:92574989:C:T	74410	44	53	0.278947	5.09217e-07	0.145235	0.026897	0.00190449
ENSG00000148680	rs28842222:92574994:G:A	74415	44	53	0.278947	5.09217e-07	0.145235	0.026897	0.00190449
ENSG00000148680	rs112674986:92575116:T:G	74537	19	20	0.105263	2.46655e-05	0.18973	0.0427252	0.0294364
ENSG00000148680	rs12415970:92575692:G:A	75113	46	57	0.3	9.1658e-07	0.137133	0.0260698	0.00284549
ENSG00000148680	rs11814840:92576193:A:G	75614	46	57	0.3	9.13438e-07	0.137132	0.0260655	0.00283835
ENSG00000148680	rs11813096:92576390:T:C	75811	46	57	0.3	9.13438e-07	0.137132	0.0260655	0.00283835
ENSG00000148680	rs35863839:92577039:T:C	76460	46	56	0.294737	1.02297e-06	0.139011	0.0265593	0.0030884
ENSG00000148680	rs79576879:92577727:C:T	77148	19	20	0.105263	2.39448e-05	0.189963	0.0427031	0.0288442
ENSG00000148680	rs113756497:92587963:T:G	87384	19	20	0.105263	2.28847e-05	0.189934	0.0425837	0.0279933
ENSG00000148680	rs143656204:92590819:ATC:A	90240	19	20	0.105263	2.28847e-05	0.189934	0.0425837	0.0279933
ENSG00000148680	rs34871116:92591998:A:G	91419	50	62	0.326316	1.67469e-06	0.133526	0.0261029	0.00439605
ENSG00000148680	rs10748554:92603438:G:A	102859	66	82	0.431579	2.42536e-05	0.121536	0.0273415	0.0291117
ENSG00000148680	rs144240570:92607741:AGAAAAC:A	107162	19	21	0.110526	2.10085e-05	0.178915	0.0399143	0.0265655
ENSG00000148680	rs12259062	109466	70	91	0.478947	3.18643e-05	0.116428	0.0266207	0.0346459
ENSG00000148680	rs7905446:92619161:T:G	118582	70	91	0.478947	5.56927e-05	0.113879	0.026953	0.049944
ENSG00000148680	rs79703029:92656997:T:C	156418	19	20	0.105263	2.28847e-05	0.189934	0.0425837	0.0279933
ENSG00000148680	rs75758748:92661005:A:G	160426	19	20	0.105263	2.28847e-05	0.189934	0.0425837	0.0279933
ENSG00000148680	rs41286918:92665837:T:G	165258	19	20	0.105263	2.28847e-05	0.189934	0.0425837	0.0279933
ENSG00000148680	rs4522081:92666683:T:A	166104	69	89	0.468421	1.30172e-05	0.12487	0.0271114	0.0189591
ENSG00000148680	rs77532055:92667287:C:G	166708	19	20	0.105263	2.28847e-05	0.189934	0.0425837	0.0279933
ENSG00000165879	rs11189037:98974707:C:G	-104316	73	94	0.494737	5.03219e-05	0.205035	0.0482175	0.0469044
ENSG00000165879	rs11189038:98974765:A:T	-104258	73	94	0.494737	5.09958e-05	0.204815	0.0482062	0.0473279
ENSG00000165879	rs701810:98974849:C:T	-104174	54	69	0.363158	1.54114e-05	-0.204103	0.0447348	0.0213178
ENSG00000165879	rs701812:98975413:A:G	-103610	54	69	0.363158	1.58634e-05	-0.20365	0.0447083	0.021726
ENSG00000165879	rs701813:98975632:C:T	-103391	54	69	0.363158	1.56617e-05	-0.203748	0.0446975	0.0215202
ENSG00000165879	rs701814:98975719:G:A	-103304	54	69	0.363158	1.57985e-05	-0.203679	0.0447042	0.0216525
ENSG00000165879	rs701815	-103130	54	69	0.363158	2.48987e-05	-0.197396	0.044476	0.0295323
ENSG00000165879	rs1687369:98976923:G:A	-102100	52	66	0.347368	2.66209e-05	-0.200594	0.0453752	0.0306828
ENSG00000165879	rs701816:98977250:C:T	-101773	52	65	0.342105	2.31217e-05	-0.202458	0.0454191	0.02819
ENSG00000165879	rs701817:98977329:G:C	-101694	55	70	0.368421	2.03909e-05	-0.20222	0.0450356	0.0260022
ENSG00000165879	rs1687371:98978183:T:A	-100840	54	68	0.357895	1.27175e-05	-0.206328	0.0447394	0.0186281
ENSG00000165879	rs1687372:98978185:A:T	-100838	54	68	0.357895	1.54855e-05	-0.204683	0.0448739	0.021369
ENSG00000165879	rs1147600:98981643:T:C	-97380	52	65	0.342105	1.67315e-05	-0.205428	0.0452348	0.0226156
ENSG00000165879	rs701819:98986316:C:A	-92707	52	65	0.342105	1.78748e-05	-0.20565	0.0454544	0.0237334
ENSG00000165879	rs793518:98986970:C:T	-92053	48	58	0.305263	4.55739e-05	-0.205345	0.0479916	0.0438749
ENSG00000165879	rs793517:98987522:T:C	-91501	52	65	0.342105	1.71824e-05	-0.206109	0.0454535	0.023065
ENSG00000165879	rs793516:98987985:G:T	-91038	52	65	0.342105	1.71824e-05	-0.206109	0.0454535	0.023065
ENSG00000165879	rs793515:98988469:A:C	-90554	48	58	0.305263	4.48519e-05	-0.205555	0.047993	0.0434481
ENSG00000165879	rs1468069	-90264	68	87	0.457895	4.98344e-05	0.197933	0.0465188	0.0466293
ENSG00000165879	rs2861875:98990139:G:C	-88884	72	93	0.489474	2.05305e-05	0.211178	0.047049	0.0261297
ENSG00000165879	rs36194071:98993101:CCT:C	-85922	48	58	0.305263	4.43193e-05	-0.205535	0.0479527	0.0431358
ENSG00000165879	rs12220695:98993813:C:T	-85210	72	93	0.489474	1.99551e-05	0.211435	0.0470291	0.0255964
ENSG00000165879	rs2484881:98998266:C:T	-80757	56	69	0.363158	4.01827e-05	-0.201127	0.0466406	0.0404802
ENSG00000165879	rs2484880:98998355:T:C	-80668	56	69	0.363158	4.01827e-05	-0.201127	0.0466406	0.0404802
ENSG00000165879	rs34787876:98999213:T:C	-79810	56	69	0.363158	3.99791e-05	-0.201131	0.0466271	0.0403426
ENSG00000165879	rs35958306:99000019:AT:A	-79004	72	93	0.489474	1.97549e-05	0.211317	0.0469757	0.0254221
ENSG00000165879	rs2065861:99004608:C:T	-74415	72	93	0.489474	1.90261e-05	0.211413	0.0468955	0.0247863
ENSG00000165879	rs13439:99006083:G:A	-72940	56	69	0.363158	3.89613e-05	-0.200889	0.0464972	0.0396206
ENSG00000165879	rs10882880:99008068:G:A	-70955	72	93	0.489474	1.85767e-05	0.211439	0.046837	0.0243773
ENSG00000165879	rs10786319:99008951:T:C	-70072	72	94	0.494737	5.04126e-05	0.198848	0.0467679	0.046972
ENSG00000165879	rs10882881:99010067:T:A	-68956	72	94	0.494737	5.04429e-05	0.198798	0.0467578	0.0469826
ENSG00000165879	rs10882883:99013312:A:G	-65711	72	93	0.489474	1.80573e-05	0.21145	0.0467635	0.0238845
ENSG00000165879	rs11352764:99017568:CT:C	-61455	72	93	0.489474	1.79731e-05	0.211402	0.0467403	0.0238104
ENSG00000165879	rs3740522:99019144:C:T	-59879	72	93	0.489474	1.79731e-05	0.211402	0.0467403	0.0238104
ENSG00000165879	rs796980:99024154:G:A	-54869	60	74	0.389474	1.65467e-05	-0.213572	0.0469985	0.0224388
ENSG00000165879	rs793524:99024572:A:G	-54451	60	74	0.389474	1.65467e-05	-0.213572	0.0469985	0.0224388
ENSG00000165879	rs10882884:99025611:T:A	-53412	72	93	0.489474	1.80925e-05	0.211334	0.046743	0.023915
ENSG00000165879	rs7072078:99026509:G:A	-52514	72	94	0.494737	4.9753e-05	0.198672	0.0466877	0.0465803
ENSG00000165879	rs793520:99032375:G:A	-46648	60	74	0.389474	1.64796e-05	-0.21407	0.0470972	0.0223703
ENSG00000165879	rs10748692:99032843:C:T	-46180	72	94	0.494737	4.82197e-05	0.199765	0.0468524	0.0455755
ENSG00000165879	rs1253387:99032968:G:A	-46055	60	74	0.389474	1.64743e-05	-0.214041	0.04709	0.022364
ENSG00000165879	rs34076906:99045263:C:CA	-33760	70	90	0.473684	1.60849e-05	0.211785	0.0465306	0.0219566
ENSG00000165879	rs10882889:99045890:A:G	-33133	72	93	0.489474	1.6285e-05	0.21272	0.0467687	0.0221848
ENSG00000165879	rs10786324:99054387:A:G	-24636	72	93	0.489474	1.5978e-05	0.212886	0.0467549	0.0218496
ENSG00000165879	rs10748694:99056190:A:T	-22833	72	93	0.489474	1.54034e-05	0.213181	0.046723	0.0213178
ENSG00000165879	rs10736116:99056921:C:G	-22102	73	95	0.5	4.13446e-05	0.202959	0.0471484	0.0412098
ENSG00000165879	rs10882891	-19378	70	91	0.478947	1.04004e-05	0.21227	0.0455221	0.0161938
ENSG00000165879	rs12221430:99061386:C:G	-17637	70	91	0.478947	9.54508e-06	0.213414	0.0455548	0.0151871
ENSG00000165879	rs35363447:99065881:AATTT:A	-13142	70	91	0.478947	1.04004e-05	0.21227	0.0455221	0.0161938
ENSG00000165879	rs10786325:99068738:C:G	-10285	72	95	0.5	1.59876e-05	0.207805	0.0456406	0.0218565
ENSG00000165879	rs11189120:99069493:G:T	-9530	72	95	0.5	1.59876e-05	0.207805	0.0456406	0.0218565
ENSG00000165879	rs10786326:99070377:G:A	-8646	72	95	0.5	1.59876e-05	0.207805	0.0456406	0.0218565
ENSG00000165879	rs10786327	-7615	72	95	0.5	1.59876e-05	0.207805	0.0456406	0.0218565
ENSG00000165879	rs4919087:99072507:A:G	-6516	72	95	0.5	1.80188e-05	0.209045	0.046226	0.0238531
ENSG00000165879	rs11189122:99072595:G:A	-6428	72	95	0.5	1.6247e-05	0.207873	0.045697	0.0221425
ENSG00000165879	rs10882894:99074100:C:A	-4923	72	95	0.5	1.64294e-05	0.207938	0.0457402	0.0223234
ENSG00000165879	rs10786329:99074621:G:A	-4402	70	91	0.478947	1.0351e-05	0.212709	0.0456044	0.0161363
ENSG00000165879	rs7067835:99074649:T:C	-4374	70	91	0.478947	1.0351e-05	0.212709	0.0456044	0.0161363
ENSG00000165879	rs10786330:99074959:C:A	-4064	70	91	0.478947	1.12607e-05	0.212415	0.0457516	0.0171738
ENSG00000165879	rs10882895:99075300:A:G	-3723	70	91	0.478947	1.09386e-05	0.212312	0.0456568	0.0167958
ENSG00000165879	rs3740512:99078745:C:T	-278	71	92	0.484211	7.29082e-06	0.219234	0.0461277	0.0124274
ENSG00000165879	rs11189127:99079023:G:A	0	71	92	0.484211	7.28325e-06	0.219215	0.0461211	0.0124176
ENSG00000165879	rs3781373:99080585:C:T	1562	69	88	0.463158	3.61717e-05	0.204086	0.0470231	0.037651
ENSG00000165879	rs61863767:99084426:C:T	5403	70	91	0.478947	1.13074e-05	0.213322	0.0459573	0.0172247
ENSG00000165879	rs945187:99091369:G:A	12346	70	92	0.484211	1.21549e-05	0.211877	0.0458279	0.0180608
ENSG00000165879	rs12571098:99095208:A:G	16185	67	88	0.463158	3.33908e-05	0.196848	0.0451357	0.0357086
ENSG00000165879	rs12413688:99095544:A:G	16521	68	89	0.468421	3.7268e-05	0.197639	0.0456207	0.0384556
ENSG00000165879	rs11189137:99095687:C:G	16664	68	89	0.468421	3.84307e-05	0.19732	0.0456328	0.0392207
ENSG00000165879	rs10882899:99095945:G:C	16922	68	89	0.468421	4.04533e-05	0.196799	0.045656	0.0406285
ENSG00000165879	rs4917766	18168	68	89	0.468421	4.02607e-05	0.195258	0.045285	0.0405491
ENSG00000165879	rs10786334:99098537:C:T	19514	67	87	0.457895	4.67276e-05	0.195933	0.0458635	0.0446159
ENSG00000165879	rs10786335:99098702:C:T	19679	67	87	0.457895	4.59873e-05	0.196262	0.0458946	0.0441406
ENSG00000165879	rs11189138:99099397:T:C	20374	68	89	0.468421	4.16723e-05	0.198232	0.0460726	0.0414356
ENSG00000119943	rs7075655:100142068:A:G	-1255	55	62	0.326316	6.47863e-08	0.380803	0.0648002	0.000429189
ENSG00000119943	rs17109597	-1169	44	49	0.257895	3.34402e-06	0.339631	0.0686592	0.00705553
ENSG00000119943	rs5787280:100144009:T:TGAC	686	64	85	0.447368	1.89293e-05	0.256844	0.0569562	0.0246974
ENSG00000119943	rs2296441:100144782:C:T	1459	55	62	0.326316	4.53786e-08	0.385724	0.0647485	0.000324229
ENSG00000119943	rs4400721:100147097:G:A	3774	55	64	0.336842	3.91093e-07	0.342449	0.0626995	0.00161236
ENSG00000119943	rs2274248:100148542:C:T	5219	44	49	0.257895	3.38699e-06	0.339562	0.0686889	0.00713011
ENSG00000119943	rs11189591:100155296:T:G	11973	59	75	0.394737	9.60484e-06	0.272431	0.058172	0.0152663
ENSG00000119943	rs11189592:100155642:C:A	12319	44	49	0.257895	3.38699e-06	0.339562	0.0686889	0.00713011
ENSG00000119943	rs11598689:100156027:G:T	12704	41	46	0.242105	1.08778e-06	0.354484	0.0679182	0.00322993
ENSG00000119943	rs7914401:100163928:T:C	20605	50	61	0.321053	2.98036e-07	0.324556	0.0587399	0.00129881
ENSG00000119943	rs733345:100164215:G:T	20892	50	61	0.321053	2.99031e-07	0.324497	0.0587374	0.00130214
ENSG00000119943	rs733346:100164325:A:C	21002	50	61	0.321053	2.99031e-07	0.324497	0.0587374	0.00130214
ENSG00000119943	rs7915108:100164441:T:C	21118	47	55	0.289474	1.04029e-07	0.35631	0.0617677	0.00060462
ENSG00000119943	rs7901577:100164442:A:G	21119	47	55	0.289474	1.04029e-07	0.35631	0.0617677	0.00060462
ENSG00000119943	rs4474372:100164571:C:T	21248	50	61	0.321053	2.84787e-07	0.325423	0.0587838	0.00125078
ENSG00000119943	rs4475861:100164989:C:T	21666	52	63	0.331579	1.15889e-06	0.311615	0.0598787	0.00338639
ENSG00000119943	rs2147901:100165496:C:A	22173	52	65	0.342105	4.48908e-06	0.288178	0.0591274	0.0086934
ENSG00000119943	rs10732782:100166506:C:A	23183	50	61	0.321053	3.02088e-07	0.324368	0.0587392	0.00131222
ENSG00000119943	rs7910973:100166732:G:A	23409	50	61	0.321053	3.02088e-07	0.324368	0.0587392	0.00131222
ENSG00000119943	rs7911036:100167015:A:T	23692	50	61	0.321053	3.01041e-07	0.32443	0.0587418	0.00130953
ENSG00000119943	rs10883090:100167236:G:C	23913	50	61	0.321053	3.02088e-07	0.324368	0.0587392	0.00131222
ENSG00000119943	rs10883091:100167239:C:T	23916	51	63	0.331579	6.09043e-07	0.314937	0.0587855	0.00213381
ENSG00000119943	rs10883092:100167276:A:C	23953	51	63	0.331579	6.29892e-07	0.314281	0.0587504	0.00219
ENSG00000119943	rs11189595:100167322:C:T	23999	39	44	0.231579	1.00674e-06	0.358273	0.0684012	0.00305638
ENSG00000119943	rs12763326	24073	50	61	0.321053	3.02088e-07	0.324368	0.0587392	0.00131222
ENSG00000119943	rs45523432:100167436:T:C	24113	50	61	0.321053	3.02088e-07	0.324368	0.0587392	0.00131222
ENSG00000119943	rs12763044:100167451:C:G	24128	50	61	0.321053	3.02088e-07	0.324368	0.0587392	0.00131222
ENSG00000119943	rs942809:100168001:G:A	24678	52	65	0.342105	4.47251e-06	0.288248	0.0591305	0.00866779
ENSG00000119943	rs942808:100168102:C:A	24779	50	61	0.321053	3.02088e-07	0.324368	0.0587392	0.00131222
ENSG00000119943	rs942807:100168219:G:A	24896	50	61	0.321053	3.02088e-07	0.324368	0.0587392	0.00131222
ENSG00000119943	rs942806:100168248:G:A	24925	50	61	0.321053	3.02088e-07	0.324368	0.0587392	0.00131222
ENSG00000119943	rs5787283:100168329:G:GC	25006	50	61	0.321053	3.02088e-07	0.324368	0.0587392	0.00131222
ENSG00000119943	rs942805:100168372:G:A	25049	50	61	0.321053	3.02088e-07	0.324368	0.0587392	0.00131222
ENSG00000119943	rs942804:100168499:C:A	25176	50	61	0.321053	3.0318e-07	0.324342	0.0587435	0.00131629
ENSG00000119943	rs942803:100168631:G:T	25308	52	65	0.342105	6.75868e-06	0.281019	0.0588918	0.0118231
ENSG00000119943	rs60813721:100169013:A:ACTG	25690	39	44	0.231579	1.00845e-06	0.358243	0.0684008	0.00306074
ENSG00000119943	rs12259939:100169021:T:C	25698	52	65	0.342105	6.82253e-06	0.28089	0.0588937	0.0118829
ENSG00000119943	rs9787550:100169051:C:T	25728	50	61	0.321053	3.09574e-07	0.324181	0.0587663	0.00133939
ENSG00000119943	rs7923729	26142	52	65	0.342105	6.88728e-06	0.280759	0.0588955	0.0119374
ENSG00000119943	rs9804285:100169472:C:T	26149	52	65	0.342105	6.76904e-06	0.281046	0.0589021	0.0118231
ENSG00000119943	rs6584197:100169685:G:A	26362	53	67	0.352632	1.18493e-05	0.27271	0.0589029	0.0177674
ENSG00000119943	rs6584198:100169906:G:C	26583	52	65	0.342105	6.88728e-06	0.280759	0.0588955	0.0119374
ENSG00000119943	rs6584199:100169983:A:G	26660	52	65	0.342105	6.88728e-06	0.280759	0.0588955	0.0119374
ENSG00000119943	rs6584200:100170037:A:G	26714	52	65	0.342105	6.88728e-06	0.280759	0.0588955	0.0119374
ENSG00000119943	rs6584201:100170209:T:C	26886	52	65	0.342105	6.88728e-06	0.280759	0.0588955	0.0119374
ENSG00000119943	rs6584202:100170383:G:A	27060	53	67	0.352632	1.18493e-05	0.27271	0.0589029	0.0177674
ENSG00000119943	rs3814140:100170762:C:T	27439	52	65	0.342105	6.88728e-06	0.280759	0.0588955	0.0119374
ENSG00000119943	rs3814141:100171028:G:A	27705	44	51	0.268421	2.78957e-06	0.325587	0.0652331	0.00629621
ENSG00000119943	rs3814142:100171104:C:G	27781	52	65	0.342105	6.79838e-06	0.281036	0.0589133	0.0118554
ENSG00000119943	rs3829853:100171174:A:G	27851	52	65	0.342105	6.88728e-06	0.280759	0.0588955	0.0119374
ENSG00000119943	rs10748728:100171198:C:T	27875	52	65	0.342105	6.88728e-06	0.280759	0.0588955	0.0119374
ENSG00000119943	rs10748729:100171371:G:C	28048	52	65	0.342105	6.88728e-06	0.280759	0.0588955	0.0119374
ENSG00000119943	rs10748730:100171440:C:T	28117	52	65	0.342105	6.88728e-06	0.280759	0.0588955	0.0119374
ENSG00000119943	rs10736129:100171571:A:G	28248	52	65	0.342105	6.88728e-06	0.280759	0.0588955	0.0119374
ENSG00000119943	rs7909822:100172035:A:C	28712	53	67	0.352632	1.18493e-05	0.27271	0.0589029	0.0177674
ENSG00000119943	rs7910014:100172110:C:T	28787	52	65	0.342105	6.88728e-06	0.280759	0.0588955	0.0119374
ENSG00000119943	rs7910247:100172252:C:T	28929	52	65	0.342105	6.88728e-06	0.280759	0.0588955	0.0119374
ENSG00000119943	rs10717289:100172311:GC:G	28988	52	65	0.342105	6.88728e-06	0.280759	0.0588955	0.0119374
ENSG00000119943	rs7913541:100172479:A:G	29156	52	65	0.342105	6.92092e-06	0.280742	0.0589071	0.011964
ENSG00000119943	rs4258311:100173328:G:A	30005	52	65	0.342105	6.88648e-06	0.280842	0.0589127	0.0119374
ENSG00000119943	rs6584203:100173428:G:A	30105	52	65	0.342105	6.92092e-06	0.280742	0.0589071	0.011964
ENSG00000119943	rs6584204:100173580:C:G	30257	52	65	0.342105	7.13415e-06	0.280543	0.0589597	0.0122321
ENSG00000119943	rs6584205:100173806:C:T	30483	52	65	0.342105	6.92092e-06	0.280742	0.0589071	0.011964
ENSG00000119943	rs5787284:100174167:A:AG	30844	52	65	0.342105	6.91009e-06	0.280801	0.0589148	0.0119608
ENSG00000119943	rs3750601:100174561:C:A	31238	52	65	0.342105	6.91009e-06	0.280801	0.0589148	0.0119608
ENSG00000119943	rs2147900:100174721:T:C	31398	52	65	0.342105	6.91009e-06	0.280801	0.0589148	0.0119608
ENSG00000119943	rs2274246:100175060:C:T	31737	52	65	0.342105	6.92092e-06	0.280742	0.0589071	0.011964
ENSG00000119943	rs2274245:100175082:C:T	31759	52	65	0.342105	6.92092e-06	0.280742	0.0589071	0.011964
ENSG00000119943	rs2274244:100175218:A:G	31895	52	65	0.342105	6.88728e-06	0.280759	0.0588955	0.0119374
ENSG00000119943	rs2274243:100175267:T:C	31944	52	65	0.342105	6.92092e-06	0.280742	0.0589071	0.011964
ENSG00000119943	rs8181292:100175477:A:G	32154	53	67	0.352632	1.19456e-05	0.272597	0.0589049	0.0178775
ENSG00000119943	rs3833718:100175529:CA:C	32206	52	65	0.342105	6.88312e-06	0.280789	0.0589001	0.0119374
ENSG00000119943	rs113195335:100175532:A:C	32209	52	65	0.342105	6.88312e-06	0.280789	0.0589001	0.0119374
ENSG00000119943	rs3750603:100175536:A:T	32213	52	65	0.342105	6.88312e-06	0.280789	0.0589001	0.0119374
ENSG00000119943	rs3750604:100175581:G:A	32258	39	44	0.231579	1.0132e-06	0.357892	0.0683484	0.00307018
ENSG00000119943	rs3750605:100175654:C:T	32331	44	51	0.268421	2.74491e-06	0.325458	0.0651556	0.00622272
ENSG00000119943	rs2296435:100182285:T:C	38962	39	45	0.236842	1.75392e-06	0.341407	0.0668877	0.0045386
ENSG00000119943	rs2296433:100184062:C:A	40739	39	45	0.236842	1.80077e-06	0.340618	0.0668166	0.00463031
ENSG00000119943	rs2296432:100184063:C:G	40740	39	45	0.236842	1.80077e-06	0.340618	0.0668166	0.00463031
ENSG00000107554	rs12771624:101601236:C:T	-34099	48	61	0.321053	9.70297e-06	0.108898	0.0232657	0.0153819
ENSG00000107554	rs3740067:101603781:C:G	-31554	48	62	0.326316	6.54582e-06	0.108716	0.0227449	0.0115678
ENSG00000107554	rs3740066:101604207:C:T	-31128	50	65	0.342105	1.56693e-05	0.103559	0.022719	0.0215289
ENSG00000107554	rs3780880:101608522:C:G	-26813	49	63	0.331579	5.76582e-06	0.109147	0.0226843	0.0105061
ENSG00000107554	rs12826:101612320:C:T	-23015	48	62	0.326316	5.92648e-06	0.108401	0.0225615	0.010707
ENSG00000107554	rs34928487:101613168:T:TG	-22167	49	64	0.336842	9.32964e-06	0.104831	0.0223494	0.0148992
ENSG00000107554	rs7067971	-18756	49	64	0.336842	9.2674e-06	0.1047	0.0223134	0.014811
ENSG00000107554	rs7894906:101617427:G:A	-17908	49	64	0.336842	9.2674e-06	0.1047	0.0223134	0.014811
ENSG00000107554	rs7898268:101617792:C:T	-17543	49	64	0.336842	9.2674e-06	0.1047	0.0223134	0.014811
ENSG00000107554	rs7898603:101617938:G:C	-17397	49	64	0.336842	9.2674e-06	0.1047	0.0223134	0.014811
ENSG00000107554	rs7091174:101626927:C:T	-8408	49	63	0.331579	7.82375e-07	0.118296	0.0223285	0.00253907
ENSG00000107554	rs7076230:101630921:A:T	-4414	55	71	0.373684	3.12582e-05	0.0998624	0.0228067	0.0342121
ENSG00000107554	rs7076357:101631005:A:C	-4330	49	62	0.326316	2.65829e-07	0.123631	0.0222679	0.00121622
ENSG00000107554	rs7076478:101631013:C:T	-4322	56	72	0.378947	2.78093e-05	0.100954	0.0228955	0.0315071
ENSG00000107554	rs7095052	-3982	55	71	0.373684	3.1039e-05	0.0999026	0.0228063	0.0340275
ENSG00000107554	rs7089647:101631595:G:C	-3740	49	62	0.326316	2.66001e-07	0.123646	0.0222712	0.00121649
ENSG00000107554	rs2862917:101631669:T:C	-3666	55	71	0.373684	3.1039e-05	0.0999026	0.0228063	0.0340275
ENSG00000107554	rs2862918:101631765:T:C	-3570	55	71	0.373684	3.1039e-05	0.0999026	0.0228063	0.0340275
ENSG00000107554	rs2862919:101631869:C:T	-3466	55	71	0.373684	3.1039e-05	0.0999026	0.0228063	0.0340275
ENSG00000107554	rs11598746:101632831:C:T	-2504	49	62	0.326316	2.66001e-07	0.123646	0.0222712	0.00121649
ENSG00000107554	rs11190302:101632915:C:T	-2420	55	71	0.373684	3.1039e-05	0.0999026	0.0228063	0.0340275
ENSG00000107554	rs11598781:101633020:C:T	-2315	55	71	0.373684	3.1039e-05	0.0999026	0.0228063	0.0340275
ENSG00000107554	rs7088369:101634952:T:C	-383	50	63	0.331579	4.73776e-07	0.12193	0.0225102	0.00181486
ENSG00000107554	rs7070537:101635077:C:A	-258	55	71	0.373684	3.1039e-05	0.0999026	0.0228063	0.0340275
ENSG00000107554	rs7088560:101635138:T:C	-197	55	70	0.368421	2.10494e-05	0.103417	0.0230739	0.0265882
ENSG00000107554	rs35146279:101635517:A:AG	182	55	70	0.368421	2.10494e-05	0.103417	0.0230739	0.0265882
ENSG00000107554	rs11190305:101639877:A:C	4542	49	62	0.326316	2.73632e-07	0.123533	0.0222774	0.00122572
ENSG00000107554	rs35409024:101646975:A:G	11640	55	70	0.368421	2.12443e-05	0.103429	0.0230889	0.0267069
ENSG00000107554	rs11595871:101647611:C:T	12276	55	70	0.368421	2.12548e-05	0.103432	0.0230902	0.0267155
ENSG00000107554	rs11596617:101648996:G:C	13661	55	70	0.368421	2.12663e-05	0.103434	0.0230915	0.0267262
ENSG00000107554	rs12415442:101650740:C:T	15405	55	70	0.368421	2.11847e-05	0.103467	0.0230938	0.0266915
ENSG00000107554	rs61872202:101651165:C:T	15830	55	70	0.368421	2.09089e-05	0.103542	0.0230929	0.0264644
ENSG00000107554	rs35715207:101652936:G:C	17601	49	62	0.326316	2.55509e-07	0.123981	0.022294	0.00118296
ENSG00000107554	rs11594024:101654991:C:A	19656	47	59	0.310526	3.1061e-08	0.132804	0.0219777	0.00026165
ENSG00000107554	rs3740058:101655982:G:A	20647	47	60	0.315789	7.64087e-08	0.127672	0.0218652	0.000486292
ENSG00000107554	rs7090333:101656449:A:G	21114	64	84	0.442105	2.2668e-05	0.101698	0.0227883	0.0277908
ENSG00000107554	rs7919323:101657880:G:A	22545	47	60	0.315789	7.58789e-08	0.127674	0.0218596	0.000483613
ENSG00000107554	rs7904812:101658241:T:A	22906	47	60	0.315789	6.80654e-08	0.127967	0.0218174	0.000445804
ENSG00000107554	rs3740057	23250	64	84	0.442105	2.26069e-05	0.101677	0.0227801	0.027734
ENSG00000107554	rs7342084:101660047:T:G	24712	59	77	0.405263	7.38429e-08	0.124499	0.0212935	0.000473181
ENSG00000107554	rs12781631:101662469:G:C	27134	47	60	0.315789	7.5593e-08	0.127772	0.0218733	0.000482286
ENSG00000107554	rs12761972:101662477:C:G	27142	64	84	0.442105	2.2179e-05	0.101847	0.0227928	0.0273315
ENSG00000107554	rs12762327:101662514:G:A	27179	64	83	0.436842	2.23859e-05	0.103099	0.0230855	0.0275235
ENSG00000107554	rs11591332:101662765:A:C	27430	64	84	0.442105	2.20647e-05	0.10189	0.0227955	0.0272795
ENSG00000107554	rs7896403:101663049:G:A	27714	64	84	0.442105	2.21704e-05	0.101912	0.0228068	0.0273273
ENSG00000107554	rs7896859:101663438:G:T	28103	54	69	0.363158	3.61624e-05	0.100352	0.0231215	0.0376465
ENSG00000107554	rs6584330:101664170:A:G	28835	64	84	0.442105	2.26505e-05	0.101838	0.0228188	0.0277764
ENSG00000107554	rs12770496:101664256:G:A	28921	44	56	0.294737	7.59879e-07	0.12084	0.0227788	0.00249369
ENSG00000107554	rs7080613:101665097:C:T	29762	47	60	0.315789	7.65987e-08	0.127845	0.021897	0.000487318
ENSG00000107554	rs7080771:101665298:A:G	29963	64	84	0.442105	2.20926e-05	0.102006	0.0228231	0.0272857
ENSG00000107554	rs7476595:101665450:A:G	30115	64	84	0.442105	2.20926e-05	0.102006	0.0228231	0.0272857
ENSG00000107554	rs10883419:101665967:T:C	30632	64	84	0.442105	2.20926e-05	0.102006	0.0228231	0.0272857
ENSG00000107554	rs7910099:101666401:G:A	31066	47	60	0.315789	6.46682e-08	0.128311	0.0218328	0.000428491
ENSG00000107554	rs7898374:101666475:T:C	31140	64	84	0.442105	1.80535e-05	0.103102	0.0228013	0.0238845
ENSG00000107554	rs11190315:101667978:T:C	32643	64	84	0.442105	2.43756e-05	0.101612	0.022866	0.0292082
ENSG00000107554	rs12570265:101668570:T:C	33235	47	60	0.315789	6.26608e-08	0.128418	0.0218243	0.000416995
ENSG00000107554	rs6584332:101669211:A:C	33876	59	77	0.405263	6.94311e-08	0.125036	0.0213342	0.000453071
ENSG00000107554	rs7070572:101670020:C:T	34685	54	69	0.363158	3.49617e-05	0.100675	0.0231484	0.0367863
ENSG00000107554	rs6584333:101670125:T:C	34790	64	84	0.442105	2.14091e-05	0.102314	0.0228502	0.0268433
ENSG00000107554	rs7089008:101670337:T:G	35002	45	57	0.3	9.08478e-07	0.120474	0.0228936	0.00282727
ENSG00000107554	rs10883420:101671095:T:C	35760	64	84	0.442105	2.13024e-05	0.102355	0.0228528	0.0267583
ENSG00000107554	rs11190316:101672111:A:G	36776	47	60	0.315789	6.197e-08	0.128577	0.021842	0.00041305
ENSG00000107554	rs10883421:101672341:A:G	37006	64	84	0.442105	2.13479e-05	0.102385	0.0228624	0.0268027
ENSG00000107554	rs7093297:101672854:C:G	37519	64	84	0.442105	2.13848e-05	0.102416	0.0228716	0.0268358
ENSG00000107554	rs7894369:101674941:C:T	39606	64	83	0.436842	1.54473e-05	0.105355	0.0230944	0.0213291
ENSG00000107554	rs7894475:101674955:C:T	39620	47	60	0.315789	6.96304e-08	0.128322	0.0218972	0.000453071
ENSG00000107554	rs10883422:101675129:A:G	39794	64	83	0.436842	1.55611e-05	0.105338	0.0231003	0.0214302
ENSG00000107554	rs10883423:101675130:G:A	39795	64	83	0.436842	1.55611e-05	0.105338	0.0231003	0.0214302
ENSG00000107554	rs12767930:101675641:T:C	40306	64	84	0.442105	2.12809e-05	0.102537	0.0228921	0.0267412
ENSG00000107554	rs12768484:101675884:T:C	40549	47	60	0.315789	5.94083e-08	0.128805	0.0218452	0.000397628
ENSG00000107554	rs12780060:101677488:C:T	42153	47	60	0.315789	6.82072e-08	0.12844	0.0218999	0.000446409
ENSG00000107554	rs34080257:101681398:GC:G	46063	47	60	0.315789	5.76375e-08	0.129012	0.0218549	0.000390526
ENSG00000107554	rs12772443:101682176:C:T	46841	47	60	0.315789	5.68897e-08	0.12911	0.0218606	0.000387679
ENSG00000107554	rs7077577:101682300:A:G	46965	64	83	0.436842	1.49135e-05	0.105834	0.0231536	0.0208087
ENSG00000107554	rs7910794:101683965:C:T	48630	47	60	0.315789	6.80515e-08	0.128899	0.0219761	0.000445804
ENSG00000107554	rs59483793:101684008:CACGGTGAA:C	48673	47	60	0.315789	4.37819e-08	0.130772	0.021922	0.000314955
ENSG00000143126	rs12118605:110154085:C:T	361443	10	10	0.0526316	4.83531e-05	-0.171266	0.0401754	0.0456708
ENSG00000134202	rs10776699:110263086:C:A	-13469	59	74	0.389474	1.77693e-08	0.550231	0.0892118	0.000181445
ENSG00000134202	rs11101994:110270093:A:C	-6462	60	74	0.389474	6.98273e-08	0.531963	0.0907857	0.00045346
ENSG00000134202	rs4540683:110270908:T:G	-5647	60	74	0.389474	6.50204e-08	0.533106	0.0907297	0.000430148
ENSG00000134202	rs4970736:110272645:C:T	-3910	60	75	0.394737	3.47673e-08	0.535202	0.0889434	0.000277336
ENSG00000134202	rs1537236:110278972:C:T	2417	67	91	0.478947	1.2886e-05	0.409039	0.0887594	0.0188087
ENSG00000134202	rs5776997:110279053:GT:G	2498	61	76	0.4	6.40907e-09	0.558839	0.0874063	9.69899e-05
ENSG00000134202	rs1537234:110279821:C:A	3266	57	74	0.389474	2.66592e-05	0.401482	0.0908249	0.0307164
ENSG00000134202	rs1332018:110282972:G:T	6417	61	77	0.405263	5.45519e-09	0.560289	0.0871501	8.59526e-05
ENSG00000134202	rs4970777	7230	61	77	0.405263	2.29123e-08	0.534165	0.0874117	0.000215717
ENSG00000258634	rs12078998:111452439:G:A	851476	12	15	0.0789474	5.5117e-05	-0.105181	0.024878	0.0496298
ENSG00000148925	rs10832031:13406306:C:T	-3243	28	31	0.163158	2.43425e-05	-0.0573504	0.0129047	0.0291789
ENSG00000148925	rs2290034:13407184:C:T	-2365	28	31	0.163158	2.43425e-05	-0.0573504	0.0129047	0.0291789
ENSG00000148925	rs11022791:13415841:C:T	6292	26	27	0.142105	3.41426e-05	-0.0618916	0.0142104	0.0361681
ENSG00000148925	rs72870951:13436408:A:G	26859	27	30	0.157895	2.61954e-05	-0.0596907	0.0134895	0.0303213
ENSG00000152404	rs7931436:107137112:C:T	-59960	65	88	0.463158	2.07497e-05	0.0868042	0.0193513	0.0263361
ENSG00000152404	rs55982480:107137727:GAA:G	-59345	65	88	0.463158	2.04042e-05	0.0868232	0.0193368	0.0260142
ENSG00000152404	rs1388168:107137917:G:A	-59155	65	88	0.463158	2.04042e-05	0.0868232	0.0193368	0.0260142
ENSG00000152404	rs568546:107321156:C:T	124084	66	84	0.442105	2.08155e-05	-0.0927099	0.0206717	0.0263908
ENSG00000110660	rs11212405:107712020:A:G	50302	64	85	0.447368	6.34028e-06	0.0693249	0.0144795	0.0112939
ENSG00000110660	rs12221840:107712430:G:A	50712	56	74	0.389474	1.69406e-05	0.0658433	0.0145088	0.022846
ENSG00000110660	rs34127928:107715256:C:CAGA	53538	65	87	0.457895	1.91804e-05	0.0661634	0.0146831	0.0249264
ENSG00000110660	rs4753819:107715569:G:A	53851	64	85	0.447368	5.68784e-06	0.0698413	0.0145051	0.0103946
ENSG00000110660	rs4753820:107715745:T:C	54027	49	66	0.347368	1.31029e-06	0.0724216	0.0139956	0.00367949
ENSG00000110660	rs12278174:107716112:C:T	54394	64	85	0.447368	6.22665e-06	0.0694577	0.0144935	0.011137
ENSG00000110660	rs10890767:107716611:A:G	54893	64	85	0.447368	6.22665e-06	0.0694577	0.0144935	0.011137
ENSG00000110660	rs10890768:107716624:T:C	54906	65	87	0.457895	1.92807e-05	0.0661352	0.0146813	0.025026
ENSG00000110660	rs10890769:107716874:G:A	55156	64	85	0.447368	5.88033e-06	0.0696044	0.0144809	0.0106482
ENSG00000110660	rs11212408:107717100:G:T	55382	64	84	0.442105	1.03593e-06	0.0754406	0.0144219	0.00311107
ENSG00000110660	rs58034440:107717642:C:T	55924	64	85	0.447368	5.98117e-06	0.0696033	0.0144934	0.0107854
ENSG00000110660	rs10890770:107718428:G:A	56710	64	85	0.447368	5.77055e-06	0.0698011	0.0145076	0.0105121
ENSG00000110660	rs10789638:107718486:T:C	56768	64	85	0.447368	6.31668e-06	0.0694175	0.014496	0.011261
ENSG00000110660	rs7949443:107719003:A:G	57285	64	84	0.442105	5.98259e-06	0.0709274	0.0147693	0.010787
ENSG00000110660	rs7952723:107719329:A:G	57611	65	87	0.457895	1.96457e-05	0.0660659	0.0146817	0.0253241
ENSG00000110660	rs7102437:107720191:C:T	58473	64	85	0.447368	5.98117e-06	0.0696033	0.0144934	0.0107854
ENSG00000110660	rs7121733:107720226:T:A	58508	65	87	0.457895	1.96457e-05	0.0660659	0.0146817	0.0253241
ENSG00000110660	rs4753821:107720941:G:T	59223	65	87	0.457895	1.96457e-05	0.0660659	0.0146817	0.0253241
ENSG00000110660	rs12418609:107721506:C:T	59788	64	85	0.447368	5.98117e-06	0.0696033	0.0144934	0.0107854
ENSG00000110660	rs4754264:107722540:C:A	60822	66	89	0.468421	1.55059e-05	0.0665012	0.0145805	0.0213934
ENSG00000110660	rs144667830:107723274:CT:C	61556	61	83	0.436842	3.99858e-05	0.0619941	0.0143719	0.0403472
ENSG00000110660	rs36043913:107725168:GATA:G	63450	65	87	0.457895	4.55994e-06	0.0701308	0.0144007	0.00878944
ENSG00000110660	rs4754265	63579	65	87	0.457895	4.5514e-06	0.0701313	0.0143994	0.00877675
ENSG00000110660	rs7109214:107726716:A:C	64998	65	87	0.457895	4.5514e-06	0.0701313	0.0143994	0.00877675
ENSG00000110660	rs11607450:107727662:A:G	65944	66	89	0.468421	1.55322e-05	0.066506	0.014583	0.0214104
ENSG00000110660	rs11212410:107728008:G:A	66290	65	87	0.457895	4.47182e-06	0.070194	0.0143993	0.00866695
ENSG00000110660	rs924859:107728430:A:T	66712	65	87	0.457895	4.5514e-06	0.0701313	0.0143994	0.00877675
ENSG00000110660	rs924860:107728662:A:G	66944	65	87	0.457895	4.60021e-06	0.0701157	0.014404	0.00883395
ENSG00000110660	rs11380459:107729116:C:CA	67398	66	89	0.468421	1.59192e-05	0.0663977	0.0145795	0.0217879
ENSG00000110660	rs11603959:107729126:G:A	67408	66	89	0.468421	1.59192e-05	0.0663977	0.0145795	0.0217879
ENSG00000110660	rs11603925:107729205:C:G	67487	66	89	0.468421	1.57211e-05	0.0664232	0.0145748	0.0215763
ENSG00000110660	rs3741065:107729561:T:C	67843	65	87	0.457895	4.51785e-06	0.0701671	0.0144013	0.00873573
ENSG00000110660	rs61906861:107730204:C:T	68486	65	87	0.457895	4.44329e-06	0.0702255	0.0144011	0.00863768
ENSG00000110660	11:107730308:TAAAA:T	68590	65	87	0.457895	1.22812e-05	0.067645	0.0146396	0.0181628
ENSG00000110660	rs7104006:107732390:A:T	70672	61	79	0.415789	2.02546e-06	0.0742594	0.014649	0.005059
ENSG00000110660	rs7104117:107732391:C:T	70673	61	79	0.415789	2.02546e-06	0.0742594	0.014649	0.005059
ENSG00000110660	rs12417231:107733687:T:A	71969	58	77	0.405263	4.32643e-05	0.0627678	0.0146222	0.0424638
ENSG00000110660	rs202243777:107734961:C:CAT	73243	58	77	0.405263	3.62228e-05	0.0636758	0.0146727	0.0376842
ENSG00000110660	rs56875439:107735081:CATAG:C	73363	58	77	0.405263	4.30157e-05	0.0627078	0.014603	0.0422908
ENSG00000110660	rs56139321:107735115:C:T	73397	58	77	0.405263	4.29195e-05	0.0627262	0.0146053	0.0422253
ENSG00000110660	rs55669117:107735150:T:A	73432	58	77	0.405263	4.29807e-05	0.0627069	0.0146021	0.0422602
ENSG00000110660	rs11212411:107735502:G:A	73784	57	76	0.4	3.64048e-05	0.0636461	0.0146703	0.0378168
ENSG00000110660	rs4754268:107736597:G:A	74879	56	74	0.389474	1.17436e-05	0.0671341	0.0144932	0.0176784
ENSG00000110660	rs4587695:107736863:G:C	75145	57	76	0.4	4.25095e-05	0.0626748	0.0145847	0.0419621
ENSG00000110660	rs57705781:107737623:G:T	75905	57	76	0.4	4.25305e-05	0.062638	0.0145766	0.0419755
ENSG00000110660	rs61906905:107737762:C:T	76044	57	76	0.4	3.58099e-05	0.0636112	0.0146476	0.0373676
ENSG00000110660	rs145803081:107737794:GACTTCAGGTGATC:G	76076	56	74	0.389474	1.1558e-05	0.067157	0.0144855	0.0174855
ENSG00000110660	rs12417999:107737927:A:T	76209	57	76	0.4	3.59188e-05	0.063574	0.0146417	0.0374445
ENSG00000110660	rs12225825:107738546:G:C	76828	57	76	0.4	4.25151e-05	0.0625811	0.014563	0.0419627
ENSG00000110660	rs12225862:107738830:G:A	77112	51	69	0.363158	3.55897e-07	0.0757716	0.0138172	0.00149731
ENSG00000110660	rs7111327:107739269:A:T	77551	59	79	0.415789	1.78724e-05	0.0662284	0.0146382	0.0237321
ENSG00000110660	rs4754270:107740685:G:A	78967	59	79	0.415789	2.1797e-05	0.0650655	0.0145466	0.0271488
ENSG00000110660	rs73007259:107741216:G:A	79498	59	79	0.415789	2.18195e-05	0.0650271	0.0145388	0.0271637
ENSG00000110660	rs7946548:107742791:G:C	81073	59	79	0.415789	2.21232e-05	0.0648753	0.0145166	0.0272857
ENSG00000110660	rs11212414:107743155:A:G	81437	53	71	0.373684	3.70366e-07	0.076023	0.0138867	0.00154698
ENSG00000110660	rs4466794	81864	59	79	0.415789	2.23417e-05	0.0641547	0.0143635	0.0274807
ENSG00000110660	rs11212416:107743594:A:G	81876	59	79	0.415789	2.23281e-05	0.0647741	0.0145017	0.027468
ENSG00000110660	rs11212419:107744303:A:G	82585	59	79	0.415789	2.75574e-05	0.0648053	0.0146893	0.0312748
ENSG00000166266	rs575008:107707896:T:G	-171564	60	81	0.426316	4.4004e-05	0.0500252	0.011666	0.0429068
ENSG00000166266	rs493037:107713761:C:T	-165699	59	75	0.394737	4.18375e-05	0.0526886	0.0122488	0.0415618
ENSG00000166266	rs488512	-150354	59	75	0.394737	5.17271e-05	0.0519126	0.0122294	0.0478015
ENSG00000166266	rs2442683:107729615:G:T	-149845	59	75	0.394737	4.62743e-05	0.0523024	0.0122353	0.0443263
ENSG00000166266	rs502253:107731779:G:A	-147681	59	75	0.394737	4.56481e-05	0.0522717	0.0122178	0.04393
ENSG00000178202	rs74822968:108369173:G:A	26340	30	35	0.184211	2.08737e-07	-0.225497	0.040209	0.00102892
ENSG00000178202	rs4643041:108378207:T:G	35374	35	40	0.210526	3.26714e-06	-0.200257	0.0404368	0.00692585
ENSG00000178202	rs3741060:108379981:A:G	37148	28	30	0.157895	3.2141e-07	-0.252924	0.0459221	0.00137646
ENSG00000178202	rs4754325:108387409:C:T	44576	28	30	0.157895	3.29277e-07	-0.252765	0.0459403	0.00140348
ENSG00000178202	rs11350946:108393862:TA:T	51029	28	30	0.157895	3.28465e-07	-0.252885	0.0459573	0.00140097
ENSG00000178202	rs11824250:108395594:G:A	52761	38	43	0.226316	1.03586e-05	-0.190248	0.0407904	0.0161452
ENSG00000178202	rs10890853:108397640:G:A	54807	28	30	0.157895	3.31661e-07	-0.252638	0.0459313	0.00141067
ENSG00000178202	rs2155437:108412898:G:C	70065	28	30	0.157895	1.0151e-06	-0.244291	0.0466574	0.00307456
ENSG00000178202	rs10890858:108413853:C:T	71020	28	30	0.157895	1.03201e-06	-0.244086	0.0466534	0.00310262
ENSG00000178202	rs17092330:108417468:A:G	74635	29	31	0.163158	1.00482e-06	-0.24354	0.0464923	0.00305248
ENSG00000178202	rs17092334:108417492:T:C	74659	29	31	0.163158	1.00482e-06	-0.24354	0.0464923	0.00305248
ENSG00000178202	rs1940219:108430554:A:G	87721	28	30	0.157895	2.16621e-06	-0.237435	0.0469897	0.00531906
ENSG00000178202	rs4533001:108432472:A:G	89639	29	31	0.163158	4.10495e-06	-0.22986	0.0469483	0.00815179
ENSG00000178202	rs4442514:108432872:C:T	90039	29	31	0.163158	5.5171e-06	-0.226343	0.0469343	0.0101547
ENSG00000178202	rs11599962:108434421:T:C	91588	29	31	0.163158	6.97002e-06	-0.224907	0.047209	0.0120322
ENSG00000149292	rs6589372	27301	33	36	0.189474	4.13373e-05	0.14551	0.0338023	0.0412071
ENSG00000149292	rs11214580:113213298:T:C	28046	31	34	0.178947	5.12468e-05	0.148564	0.0349775	0.0474797
ENSG00000182985	rs2085833:115454258:C:T	414319	61	73	0.384211	4.42747e-05	0.729965	0.170295	0.0431159
ENSG00000182985	rs7121755	415697	61	73	0.384211	4.26754e-05	0.731021	0.170152	0.0420778
ENSG00000182985	rs61897151:115457089:T:C	417150	61	73	0.384211	4.19089e-05	0.732626	0.170335	0.0416107
ENSG00000182985	rs7126475:115457293:C:G	417354	52	59	0.310526	4.6733e-05	0.772722	0.180878	0.0446171
ENSG00000182985	rs10891869:115459745:G:A	419806	52	59	0.310526	4.75412e-05	0.772305	0.180974	0.0451572
ENSG00000182985	rs12806083:115461667:G:C	421728	48	54	0.284211	1.72576e-05	0.825238	0.182036	0.0231378
ENSG00000182985	rs2515331:115463268:T:C	423329	49	55	0.289474	5.48346e-05	-0.779768	0.184374	0.0495013
ENSG00000160588	rs17121871:118073344:T:C	-24066	67	89	0.468421	2.81179e-05	0.0950618	0.0215734	0.0317616
ENSG00000160588	rs1806:118076004:C:T	-21406	69	92	0.484211	1.25219e-05	0.0991587	0.0214828	0.0184193
ENSG00000160588	rs17121882:118081468:C:T	-15942	66	88	0.463158	5.57524e-05	0.0908557	0.0215053	0.0499869
ENSG00000160588	rs11216819:118084980:G:A	-12430	65	86	0.452632	2.49896e-05	0.0951332	0.0214394	0.0295712
ENSG00000160588	rs1540191:118090432:G:A	-6978	64	84	0.442105	7.73932e-06	0.100725	0.0212602	0.0129655
ENSG00000160588	rs2368238:118091761:T:G	-5649	64	84	0.442105	7.72677e-06	0.100785	0.021271	0.0129522
ENSG00000160588	rs11607355:118093547:C:T	-3863	64	84	0.442105	5.17276e-06	0.102985	0.0212839	0.00964505
ENSG00000160588	rs2051480:118094513:A:G	-2897	63	83	0.436842	1.67497e-05	0.0965648	0.0212647	0.0226284
ENSG00000160588	rs57495164:118095148:T:C	-2262	63	83	0.436842	1.67497e-05	0.0965648	0.0212647	0.0226284
ENSG00000160588	rs10892226:118096618:G:A	-792	63	83	0.436842	1.69825e-05	0.0965734	0.0212833	0.0228934
ENSG00000160588	rs11216825:118099617:G:A	2207	63	83	0.436842	1.6734e-05	0.0966186	0.0212754	0.0226163
ENSG00000160588	rs11216826:118099713:A:T	2303	63	83	0.436842	1.67497e-05	0.0965648	0.0212647	0.0226284
ENSG00000160588	rs869638:118100411:G:C	3001	63	83	0.436842	1.6734e-05	0.0966186	0.0212754	0.0226163
ENSG00000160588	rs1573559:118104627:G:A	7217	63	83	0.436842	1.68845e-05	0.096652	0.0212936	0.0227831
ENSG00000160588	rs55768116:118108331:C:A	10921	61	77	0.405263	3.76059e-05	0.0975019	0.0225186	0.038692
ENSG00000160588	rs11216827:118110202:A:T	12792	63	83	0.436842	1.68845e-05	0.096652	0.0212936	0.0227831
ENSG00000160588	rs60196434:118111447:GACACACAC:G	14037	65	86	0.452632	3.03079e-05	0.0947535	0.0215999	0.0334503
ENSG00000160588	rs1793145:118112433:C:T	15023	44	52	0.273684	9.91005e-06	0.113232	0.0242195	0.0156363
ENSG00000160588	rs56315433:118114576:C:A	17166	63	83	0.436842	1.69882e-05	0.0966691	0.0213047	0.0228965
ENSG00000160588	rs56356019:118114893:A:G	17483	63	83	0.436842	1.69882e-05	0.0966691	0.0213047	0.0228965
ENSG00000160588	rs2368242:118115526:T:C	18116	63	83	0.436842	1.69882e-05	0.0966691	0.0213047	0.0228965
ENSG00000160588	rs17092740:118117614:G:A	20204	63	83	0.436842	1.70463e-05	0.0966686	0.0213088	0.0229576
ENSG00000160588	rs12364013:118119575:C:T	22165	63	83	0.436842	1.70463e-05	0.0966686	0.0213088	0.0229576
ENSG00000160588	rs2853005:118120104:C:T	22694	44	52	0.273684	9.14901e-06	0.113786	0.0242329	0.0146608
ENSG00000160588	rs73024604:118120351:C:T	22941	63	83	0.436842	1.70463e-05	0.0966686	0.0213088	0.0229576
ENSG00000160588	rs73024606:118120366:G:C	22956	63	83	0.436842	1.70463e-05	0.0966686	0.0213088	0.0229576
ENSG00000160588	rs61900655:118120802:G:C	23392	63	83	0.436842	1.70463e-05	0.0966686	0.0213088	0.0229576
ENSG00000160588	rs12577053:118121421:G:A	24011	63	83	0.436842	1.70279e-05	0.0966879	0.0213117	0.0229445
ENSG00000160588	rs12577061:118121553:G:C	24143	63	83	0.436842	1.70279e-05	0.0966879	0.0213117	0.0229445
ENSG00000160588	rs1715456:118123517:A:G	26107	71	94	0.494737	1.11072e-06	0.112819	0.0216365	0.00327926
ENSG00000160588	rs1715453:118125077:T:C	27667	69	88	0.463158	3.21059e-05	0.0994953	0.0227595	0.0348131
ENSG00000160588	rs1056562	28215	69	88	0.463158	3.21059e-05	0.0994953	0.0227595	0.0348131
ENSG00000160588	rs10790248:118125672:G:A	28262	63	83	0.436842	1.71563e-05	0.0967401	0.0213323	0.0230474
ENSG00000160588	rs34823008:118126428:C:CT	29018	69	88	0.463158	3.0883e-05	0.0997292	0.0227598	0.0339104
ENSG00000160588	rs1629083:118126576:C:T	29166	70	92	0.484211	1.63616e-06	0.111524	0.0217776	0.00432431
ENSG00000160588	rs4938492:118126675:T:C	29265	63	83	0.436842	1.71563e-05	0.0967401	0.0213323	0.0230474
ENSG00000160588	rs11328010:118126860:CT:C	29450	69	88	0.463158	3.21059e-05	0.0994953	0.0227595	0.0348131
ENSG00000160588	rs4936425:118126904:C:T	29494	63	83	0.436842	1.68492e-05	0.0968259	0.0213293	0.0227455
ENSG00000160588	rs1793151:118126920:C:T	29510	69	88	0.463158	3.21059e-05	0.0994953	0.0227595	0.0348131
ENSG00000160588	rs10578550:118126970:ACTTT:A	29560	63	83	0.436842	1.68492e-05	0.0968259	0.0213293	0.0227455
ENSG00000160588	rs1793150:118127314:G:A	29904	69	88	0.463158	3.21059e-05	0.0994953	0.0227595	0.0348131
ENSG00000160588	rs1793149:118127347:A:G	29937	69	88	0.463158	3.21059e-05	0.0994953	0.0227595	0.0348131
ENSG00000160588	rs1715450:118128445:C:G	31035	69	88	0.463158	3.21059e-05	0.0994953	0.0227595	0.0348131
ENSG00000160588	rs1715449:118128455:G:A	31045	69	88	0.463158	3.21059e-05	0.0994953	0.0227595	0.0348131
ENSG00000160588	rs9919574:118128572:A:T	31162	69	88	0.463158	3.21059e-05	0.0994953	0.0227595	0.0348131
ENSG00000160588	rs56128013:118128575:A:T	31165	69	88	0.463158	3.21059e-05	0.0994953	0.0227595	0.0348131
ENSG00000160588	rs1104542:118129340:C:T	31930	63	83	0.436842	1.71563e-05	0.0967401	0.0213323	0.0230474
ENSG00000160588	rs17121997:118131049:T:C	33639	63	83	0.436842	1.62355e-05	0.0971714	0.0213605	0.0221308
ENSG00000160588	rs56083337:118131813:A:T	34403	61	77	0.405263	3.33263e-05	0.0985185	0.0225869	0.0356589
ENSG00000160588	rs1624780	37375	65	80	0.421053	1.90596e-06	0.114799	0.0225803	0.0048351
ENSG00000118058	rs2298648:117671952:C:T	-635254	14	15	0.0789474	2.11428e-05	-0.130291	0.0290773	0.0266513
ENSG00000196655	rs61506726:118831335:A:G	-57808	49	57	0.3	5.56567e-06	0.121571	0.0252201	0.0102185
ENSG00000196655	rs10892315	-57416	42	50	0.263158	1.60545e-06	0.126629	0.0247052	0.00425575
ENSG00000196655	rs10892317:118832035:T:C	-57108	42	50	0.263158	1.5623e-06	0.126789	0.0247047	0.00417812
ENSG00000196655	rs113975105:118836606:C:G	-52537	42	50	0.263158	1.03282e-06	0.129031	0.0246632	0.0031045
ENSG00000196655	rs75067211:118854372:C:T	-34771	39	45	0.236842	2.50602e-08	0.152349	0.0250127	0.000231386
ENSG00000196655	rs3887652:118856582:G:C	-32561	39	45	0.236842	2.46176e-08	0.152222	0.0249756	0.000228075
ENSG00000196655	rs4938618:118867803:G:C	-21340	39	45	0.236842	2.52125e-08	0.152304	0.025011	0.000232248
ENSG00000196655	rs4445645:118868750:G:C	-20393	46	52	0.273684	5.37116e-07	0.140051	0.0259974	0.00196926
ENSG00000196655	rs3737504:118869460:A:G	-19683	49	58	0.305263	2.49698e-07	0.134817	0.0242193	0.00115924
ENSG00000196655	rs11822103:118869539:G:A	-19604	39	45	0.236842	2.5674e-08	0.15246	0.0250533	0.000232566
ENSG00000196655	rs4558175:118872581:G:A	-16562	49	58	0.305263	8.35658e-08	0.138245	0.023759	0.000526081
ENSG00000196655	rs4573680:118872741:T:C	-16402	48	56	0.294737	4.67256e-08	0.143254	0.0240737	0.000331793
ENSG00000196655	rs368309024:118873052:ATT:A	-16091	47	56	0.294737	4.00796e-07	0.133126	0.0243999	0.00164511
ENSG00000196655	rs10892320:118873385:C:T	-15758	49	58	0.305263	8.23268e-08	0.138281	0.0237514	0.000519249
ENSG00000196655	rs9645664:118873987:T:C	-15156	45	52	0.273684	1.07694e-07	0.142539	0.0247436	0.000620038
ENSG00000196655	rs4936457:118875727:A:G	-13416	48	57	0.3	1.08787e-07	0.137558	0.0238886	0.000625236
ENSG00000196655	rs4936458:118875761:T:G	-13382	48	57	0.3	1.08787e-07	0.137558	0.0238886	0.000625236
ENSG00000196655	rs58709307:118877563:C:T	-11580	44	51	0.268421	1.97496e-07	0.140475	0.0249912	0.000982712
ENSG00000196655	rs11606357:118878222:T:C	-10921	44	50	0.263158	7.58934e-08	0.146873	0.025147	0.000483613
ENSG00000196655	rs73559119:118879824:T:C	-9319	47	54	0.284211	3.39579e-08	0.146808	0.0243761	0.000272104
ENSG00000196655	rs11825284:118880012:G:A	-9131	47	54	0.284211	3.35892e-08	0.146798	0.0243644	0.000270307
ENSG00000196655	rs11607569:118880668:T:C	-8475	38	43	0.226316	1.06717e-08	0.159967	0.0254683	0.000132752
ENSG00000196655	rs11217122:118880740:T:C	-8403	48	56	0.294737	6.27916e-08	0.141322	0.0240193	0.000417618
ENSG00000196655	rs60065241:118883491:C:A	-5652	47	55	0.289474	9.82999e-08	0.140029	0.0242201	0.000579401
ENSG00000196655	rs11828415:118884323:G:A	-4820	45	53	0.278947	2.54284e-07	0.136028	0.0244554	0.00117777
ENSG00000196655	rs11821562:118884370:T:C	-4773	45	53	0.278947	2.57274e-07	0.136022	0.0244662	0.0011898
ENSG00000196655	rs61381062:118884708:G:A	-4435	48	57	0.3	1.07286e-07	0.136957	0.023771	0.000618217
ENSG00000196655	rs58601794:118884726:T:C	-4417	48	57	0.3	1.06136e-07	0.136954	0.0237603	0.000613058
ENSG00000196655	rs59095933:118885161:G:A	-3982	45	53	0.278947	2.32697e-07	0.136559	0.0244601	0.00110576
ENSG00000196655	rs59608621:118885163:A:G	-3980	48	57	0.3	1.05006e-07	0.13695	0.0237495	0.000607991
ENSG00000196655	rs10111:118886117:C:T	-3026	44	51	0.268421	1.87916e-07	0.140378	0.024923	0.000948672
ENSG00000196655	rs7131534	-2487	47	55	0.289474	8.95916e-08	0.140039	0.0241333	0.000549733
ENSG00000196655	rs7121270:118887568:T:G	-1575	48	56	0.294737	3.88641e-08	0.143083	0.023878	0.000287556
ENSG00000196655	rs7105187:118887581:C:T	-1562	45	52	0.273684	9.1859e-08	0.142568	0.0245933	0.000558357
ENSG00000196655	rs3916581:118887887:G:T	-1256	39	45	0.236842	1.77547e-08	0.153449	0.0248787	0.000181367
ENSG00000196655	rs3916582:118887888:C:T	-1255	39	45	0.236842	1.77547e-08	0.153449	0.0248787	0.000181367
ENSG00000196655	rs11602764:118888619:A:G	-524	49	59	0.310526	1.85655e-07	0.132357	0.0234872	0.000941135
ENSG00000196655	rs11820805:118888831:T:C	-312	49	59	0.310526	1.70996e-07	0.132523	0.0234376	0.000876886
ENSG00000196655	rs11217124:118889132:A:G	-11	48	57	0.3	1.03412e-07	0.13695	0.0237352	0.000601865
ENSG00000196655	rs11217125:118889185:T:C	42	46	54	0.284211	8.04409e-07	0.13111	0.0247782	0.00258912
ENSG00000196655	rs7113753:118889378:G:A	235	53	67	0.352632	4.97709e-05	0.0988332	0.0232262	0.0465906
ENSG00000196655	rs10696222:118890542:A:AAAT	1399	47	57	0.3	1.10273e-07	0.136107	0.0236494	0.000632292
ENSG00000196655	rs4938621:118892277:C:T	3134	44	50	0.263158	8.37247e-08	0.146667	0.0252084	0.00052698
ENSG00000196655	rs117289748:118892757:C:G	3614	38	43	0.226316	1.50555e-08	0.159435	0.0256962	0.000160254
ENSG00000196655	rs143660533:118892759:A:C	3616	38	43	0.226316	1.50555e-08	0.159435	0.0256962	0.000160254
ENSG00000196655	rs61179449:118892835:G:C	3692	44	50	0.263158	9.47229e-08	0.145981	0.0252127	0.000564861
ENSG00000196655	rs58955701:118892872:C:T	3729	44	50	0.263158	9.67263e-08	0.145909	0.025221	0.000571545
ENSG00000196655	rs7127188:118893023:A:C	3880	44	50	0.263158	9.25586e-08	0.145975	0.0251886	0.000559641
ENSG00000196655	rs111322300:118893878:T:C	4735	38	43	0.226316	1.50171e-08	0.159488	0.0257025	0.000160089
ENSG00000196655	rs569:118894287:A:G	5144	38	43	0.226316	1.49686e-08	0.159527	0.0257057	0.000159873
ENSG00000196655	rs11006:118895202:A:G	6059	38	43	0.226316	1.41716e-08	0.159996	0.0257308	0.000153156
ENSG00000196655	rs2276072:118896115:A:G	6972	39	45	0.236842	2.59413e-08	0.153846	0.0252907	0.000234002
ENSG00000196655	rs2276071:118896116:A:C	6973	39	45	0.236842	2.59413e-08	0.153846	0.0252907	0.000234002
ENSG00000160695	rs2509121:118928253:C:T	-10151	57	76	0.4	2.85614e-05	0.04985	0.0113235	0.032158
ENSG00000160695	rs141565209:118935430:TAAAATA:T	-2974	58	79	0.415789	2.53035e-05	0.0495266	0.0111696	0.0297663
ENSG00000160695	rs150514425:118946251:C:CT	7847	58	79	0.415789	3.19768e-05	0.0489667	0.0111984	0.0347218
ENSG00000160695	rs1177562:118949331:C:T	10927	58	80	0.421053	1.74075e-05	0.0501752	0.0110734	0.0232633
ENSG00000143079	rs2488762	946	53	77	0.405263	4.05852e-05	0.0395413	0.00917513	0.0407079
ENSG00000143079	rs11102471:112939784:G:C	980	43	54	0.284211	1.33648e-05	0.0496408	0.0107937	0.0193532
ENSG00000149554	rs79148226:125463327:G:T	-31710	17	17	0.0894737	2.97865e-05	0.200875	0.0457437	0.0330247
ENSG00000149554	rs77291826:125464045:G:T	-30992	17	17	0.0894737	2.95702e-05	0.200831	0.0457138	0.0328389
ENSG00000149554	rs79017058:125465905:G:T	-29132	16	16	0.0842105	2.79949e-05	0.206133	0.0467678	0.0316556
ENSG00000149554	rs78574330:125466676:G:T	-28361	17	17	0.0894737	2.93597e-05	0.200785	0.0456837	0.0326932
ENSG00000149554	rs79588668:125468438:C:A	-26599	16	16	0.0842105	2.79949e-05	0.206133	0.0467678	0.0316556
ENSG00000149554	rs80101840:125482650:G:A	-12387	16	16	0.0842105	2.79949e-05	0.206133	0.0467678	0.0316556
ENSG00000149554	rs113627561:125488471:ATAATAT:A	-6566	16	16	0.0842105	2.79949e-05	0.206133	0.0467678	0.0316556
ENSG00000149554	rs111252746:125489007:C:T	-6030	17	17	0.0894737	2.93597e-05	0.200785	0.0456837	0.0326932
ENSG00000149554	rs78276367:125498872:G:C	3835	17	17	0.0894737	2.93597e-05	0.200785	0.0456837	0.0326932
ENSG00000149554	rs78170873:125499063:A:G	4026	16	16	0.0842105	2.79949e-05	0.206133	0.0467678	0.0316556
ENSG00000149554	rs113842487:125501511:A:AACACTTTGG	6474	17	17	0.0894737	2.93597e-05	0.200785	0.0456837	0.0326932
ENSG00000149554	rs113026374:125501722:ACT:A	6685	17	17	0.0894737	2.93597e-05	0.200785	0.0456837	0.0326932
ENSG00000149554	rs75145290:125502780:C:G	7743	17	17	0.0894737	2.93597e-05	0.200785	0.0456837	0.0326932
ENSG00000149554	rs112524320:125503966:C:A	8929	17	17	0.0894737	2.93597e-05	0.200785	0.0456837	0.0326932
ENSG00000149554	rs77344440:125506300:A:C	11263	17	17	0.0894737	2.93597e-05	0.200785	0.0456837	0.0326932
ENSG00000149554	rs3731422:125507277:T:C	12240	16	16	0.0842105	2.79949e-05	0.206133	0.0467678	0.0316556
ENSG00000149554	rs3731426:125507837:C:T	12800	17	17	0.0894737	2.00782e-05	0.204725	0.0455527	0.0257085
ENSG00000149554	rs3731428:125508567:G:A	13530	17	17	0.0894737	3.68309e-05	0.198703	0.0458331	0.038131
ENSG00000149554	rs113301858:125510257:T:A	15220	17	17	0.0894737	2.93597e-05	0.200785	0.0456837	0.0326932
ENSG00000149554	rs79019992:125510928:C:T	15891	17	17	0.0894737	2.93597e-05	0.200785	0.0456837	0.0326932
ENSG00000149554	rs76978286:125511572:A:G	16535	16	16	0.0842105	2.79949e-05	0.206133	0.0467678	0.0316556
ENSG00000149554	rs3731440:125511917:G:A	16880	16	16	0.0842105	2.79949e-05	0.206133	0.0467678	0.0316556
ENSG00000149554	rs3731446:125512650:A:G	17613	17	17	0.0894737	2.93597e-05	0.200785	0.0456837	0.0326932
ENSG00000149554	rs3731453:125515352:T:A	20315	17	17	0.0894737	2.93597e-05	0.200785	0.0456837	0.0326932
ENSG00000149554	rs3731459	21027	17	17	0.0894737	2.93597e-05	0.200785	0.0456837	0.0326932
ENSG00000149554	rs142402703:125519281:AT:A	24244	17	17	0.0894737	3.33434e-05	0.200301	0.0459234	0.0356726
ENSG00000149554	rs74677985:125522188:T:C	27151	17	17	0.0894737	2.93597e-05	0.200785	0.0456837	0.0326932
ENSG00000149554	rs112583294:125522954:T:C	27917	17	17	0.0894737	2.93597e-05	0.200785	0.0456837	0.0326932
ENSG00000149554	rs149558361:125523456:C:CTG	28419	17	17	0.0894737	2.93597e-05	0.200785	0.0456837	0.0326932
ENSG00000149554	rs115643922:125524235:G:A	29198	17	17	0.0894737	2.93597e-05	0.200785	0.0456837	0.0326932
ENSG00000149554	rs76011159:125531001:T:C	35964	17	17	0.0894737	2.93597e-05	0.200785	0.0456837	0.0326932
ENSG00000149554	rs77000046:125531038:C:T	36001	17	17	0.0894737	2.93597e-05	0.200785	0.0456837	0.0326932
ENSG00000149554	rs140047971:125531335:T:C	36298	17	17	0.0894737	2.93597e-05	0.200785	0.0456837	0.0326932
ENSG00000149554	rs150368853:125532195:G:GGCAAA	37158	17	17	0.0894737	2.93597e-05	0.200785	0.0456837	0.0326932
ENSG00000149554	rs77216196:125533349:C:T	38312	17	17	0.0894737	2.93597e-05	0.200785	0.0456837	0.0326932
ENSG00000149554	rs79598447:125538799:A:T	43762	17	17	0.0894737	2.93597e-05	0.200785	0.0456837	0.0326932
ENSG00000149554	rs140947164:125539786:TTA:T	44749	16	16	0.0842105	2.79949e-05	0.206133	0.0467678	0.0316556
ENSG00000149554	rs75502887:125539892:G:A	44855	16	16	0.0842105	2.79949e-05	0.206133	0.0467678	0.0316556
ENSG00000149554	rs77355001:125540686:A:G	45649	17	17	0.0894737	2.93597e-05	0.200785	0.0456837	0.0326932
ENSG00000149554	rs74524543:125542135:C:A	47098	17	17	0.0894737	2.93597e-05	0.200785	0.0456837	0.0326932
ENSG00000149554	rs138220186:125543317:C:T	48280	17	17	0.0894737	2.93597e-05	0.200785	0.0456837	0.0326932
ENSG00000149554	rs79534074:125543494:G:A	48457	17	17	0.0894737	2.93597e-05	0.200785	0.0456837	0.0326932
ENSG00000149554	rs113445309:125543961:G:C	48924	17	17	0.0894737	2.93597e-05	0.200785	0.0456837	0.0326932
ENSG00000149554	rs150728914:125545264:C:CATA	50227	17	17	0.0894737	2.93597e-05	0.200785	0.0456837	0.0326932
ENSG00000149554	rs76133534:125546413:A:T	51376	17	17	0.0894737	2.93597e-05	0.200785	0.0456837	0.0326932
ENSG00000149554	rs149711765:125546826:G:GTC	51789	17	17	0.0894737	2.93597e-05	0.200785	0.0456837	0.0326932
ENSG00000149554	rs34788353:125547869:C:T	52832	17	17	0.0894737	2.93597e-05	0.200785	0.0456837	0.0326932
ENSG00000149554	rs142772737:125553059:G:A	58022	16	16	0.0842105	2.48665e-05	0.207461	0.0467403	0.0295059
ENSG00000149554	rs73616081:125559759:G:C	64722	17	17	0.0894737	8.81002e-06	0.212591	0.0451837	0.0142717
ENSG00000149554	rs7106077:125559877:A:G	64840	19	19	0.1	3.11688e-05	0.192053	0.0438539	0.034142
ENSG00000149554	rs7106199:125559885:C:T	64848	19	19	0.1	3.11688e-05	0.192053	0.0438539	0.034142
ENSG00000149554	rs7106795	65143	20	20	0.105263	3.63354e-05	0.186776	0.0430465	0.0377677
ENSG00000149554	rs7109956:125560511:A:G	65474	19	19	0.1	3.07379e-05	0.192416	0.0438999	0.0337821
ENSG00000149554	rs76945483:125560857:C:G	65820	16	16	0.0842105	2.48665e-05	0.207461	0.0467403	0.0295059
ENSG00000149554	rs75967630:125560872:A:G	65835	16	16	0.0842105	2.48665e-05	0.207461	0.0467403	0.0295059
ENSG00000149554	rs111672057:125561098:C:G	66061	16	16	0.0842105	2.48665e-05	0.207461	0.0467403	0.0295059
ENSG00000149554	rs6590154:125561568:C:T	66531	19	19	0.1	3.1248e-05	0.192038	0.0438571	0.0342057
ENSG00000149554	rs76675328:125562908:C:A	67871	16	16	0.0842105	2.50412e-05	0.207434	0.0467535	0.0296118
ENSG00000149554	rs113677714:125565203:A:G	70166	16	16	0.0842105	2.8992e-05	0.208949	0.0475055	0.0324681
ENSG00000149554	rs79239637:125566069:T:C	71032	16	16	0.0842105	2.96539e-05	0.208982	0.0475771	0.0329096
ENSG00000149554	rs78281974:125566196:A:G	71159	16	16	0.0842105	4.26112e-05	0.197296	0.0459185	0.0420342
ENSG00000149554	rs79095969:125567173:A:G	72136	16	16	0.0842105	3.03731e-05	0.208986	0.0476463	0.0334971
ENSG00000149554	rs75593672:125568932:A:G	73895	15	15	0.0789474	3.78729e-05	0.208098	0.0480821	0.0388918
ENSG00000110074	rs11282126:126071398:T:TATATGAGA	-67553	37	40	0.210526	2.18629e-05	-0.0771086	0.017242	0.0271933
ENSG00000110074	rs56266376:126141134:A:AAAGG	2183	37	40	0.210526	1.89762e-05	-0.0773237	0.0171493	0.0247404
ENSG00000110074	rs625413	25398	37	40	0.210526	1.89762e-05	-0.0773237	0.0171493	0.0247404
ENSG00000110074	rs682991:126167696:T:C	28745	37	40	0.210526	1.78681e-05	-0.0778629	0.0172095	0.0237273
ENSG00000134909	rs2846686:128817770:T:G	-17186	21	23	0.121053	1.2018e-05	0.135539	0.0292981	0.0179572
ENSG00000134909	rs145137987:128818154:AAAC:A	-16802	22	24	0.126316	5.54619e-05	0.124508	0.0294609	0.0498126
ENSG00000134909	rs539644:128824398:A:C	-10558	21	23	0.121053	1.06088e-05	0.136121	0.0292233	0.0164302
ENSG00000134909	rs589726:128825264:C:T	-9692	21	23	0.121053	1.04854e-05	0.136035	0.0291862	0.0162848
ENSG00000134909	rs473616:128849448:C:T	14492	21	23	0.121053	9.17967e-06	0.136183	0.029008	0.0146931
ENSG00000134909	rs73029243:128853140:C:T	18184	21	23	0.121053	9.17967e-06	0.136183	0.029008	0.0146931
ENSG00000134909	11:128853436:G:GT	18480	21	23	0.121053	9.17967e-06	0.136183	0.029008	0.0146931
ENSG00000134909	rs650394:128853990:C:T	19034	21	23	0.121053	9.01106e-06	0.136323	0.0290089	0.0145159
ENSG00000134909	rs144996699:128854168:G:A	19212	21	23	0.121053	9.17967e-06	0.136183	0.029008	0.0146931
ENSG00000134909	rs1784017:128854552:A:G	19596	21	23	0.121053	9.17967e-06	0.136183	0.029008	0.0146931
ENSG00000134909	rs58575046:128855257:GA:G	20301	21	23	0.121053	9.3828e-06	0.136141	0.0290333	0.0149699
ENSG00000134909	rs522456:128859411:T:A	24455	21	23	0.121053	9.17967e-06	0.136183	0.029008	0.0146931
ENSG00000134909	rs11362997:128860962:TA:T	26006	21	23	0.121053	9.17967e-06	0.136183	0.029008	0.0146931
ENSG00000134909	rs61910960:128862676:C:T	27720	21	23	0.121053	9.17967e-06	0.136183	0.029008	0.0146931
ENSG00000134909	rs694668:128864743:G:A	29787	21	23	0.121053	9.17967e-06	0.136183	0.029008	0.0146931
ENSG00000134909	rs681408:128876612:T:A	41656	23	26	0.136842	6.68784e-06	0.130248	0.0272803	0.0117406
ENSG00000134909	rs493172:128882879:G:C	47923	25	28	0.147368	4.42322e-06	0.128285	0.0263013	0.00860859
ENSG00000134909	rs477070:128886281:T:C	51325	25	28	0.147368	4.36595e-06	0.128367	0.0263007	0.00852849
ENSG00000134909	rs2604226:128887524:G:T	52568	23	25	0.131579	2.98403e-06	0.139527	0.0280478	0.00652993
ENSG00000134909	rs11311651:128891127:TG:T	56171	21	21	0.110526	1.16246e-06	0.169847	0.0326418	0.00338639
ENSG00000134909	rs67506762:128896222:G:A	61266	21	21	0.110526	1.16246e-06	0.169847	0.0326418	0.00338639
ENSG00000134909	rs590458:128898039:C:T	63083	21	23	0.121053	8.88847e-06	0.140238	0.0298201	0.0143616
ENSG00000134909	rs61293580:128903188:G:A	68232	23	25	0.131579	2.98403e-06	0.139527	0.0280478	0.00652993
ENSG00000134909	rs497619:128904096:T:A	69140	23	25	0.131579	2.98403e-06	0.139527	0.0280478	0.00652993
ENSG00000134909	rs199720926:128910018:G:GT	75062	22	23	0.121053	8.87409e-06	0.144227	0.0306656	0.0143432
ENSG00000134909	rs498870:128910360:T:C	75404	23	25	0.131579	3.00271e-06	0.139542	0.0280594	0.00653514
ENSG00000134909	rs668673:128911191:C:A	76235	23	25	0.131579	2.98403e-06	0.139527	0.0280478	0.00652993
ENSG00000134909	rs560657:128913643:C:T	78687	23	25	0.131579	3.01845e-06	0.13942	0.0280422	0.00655143
ENSG00000134909	rs1784020:128914734:G:A	79778	25	28	0.147368	4.48991e-06	0.12809	0.0262812	0.0086945
ENSG00000134909	rs539775:128914973:C:T	80017	23	25	0.131579	3.00744e-06	0.139396	0.0280324	0.00654459
ENSG00000134909	rs544389:128924760:T:G	89804	24	27	0.142105	4.27112e-06	0.129439	0.0264908	0.00841028
ENSG00000134909	rs538933:128925370:C:T	90414	24	26	0.136842	7.96048e-07	0.144957	0.0273822	0.00256933
ENSG00000134909	rs671630:128926071:G:A	91115	21	23	0.121053	8.71079e-06	0.13659	0.0290129	0.0141552
ENSG00000134909	rs1786462:128928662:G:T	93706	24	26	0.136842	7.57518e-07	0.145378	0.0274007	0.00248764
ENSG00000134909	rs1786461:128928692:A:C	93736	24	26	0.136842	7.57518e-07	0.145378	0.0274007	0.00248764
ENSG00000134909	rs558066:128929581:G:A	94625	24	26	0.136842	7.57518e-07	0.145378	0.0274007	0.00248764
ENSG00000134909	rs1661966:128930045:T:C	95089	24	26	0.136842	7.57518e-07	0.145378	0.0274007	0.00248764
ENSG00000134909	rs146118165:128930304:GAAGA:G	95348	24	26	0.136842	7.48384e-07	0.145481	0.0274051	0.00246485
ENSG00000134909	rs528864:128930455:C:G	95499	24	26	0.136842	7.48384e-07	0.145481	0.0274051	0.00246485
ENSG00000134909	rs676257:128932672:A:G	97716	24	26	0.136842	7.57992e-07	0.145371	0.0274	0.00248895
ENSG00000134909	rs147621402:128933098:ATATGCTAACATCATCATT:A	98142	23	25	0.131579	2.80592e-06	0.140031	0.0280641	0.00632295
ENSG00000134909	rs670762:128946833:C:A	111877	24	26	0.136842	7.6739e-07	0.145733	0.0274834	0.00251031
ENSG00000134909	rs504025:128948038:C:G	113082	23	25	0.131579	2.84832e-06	0.140455	0.0281696	0.00636865
ENSG00000134909	rs35618379:128953911:TA:T	118955	23	25	0.131579	2.89634e-06	0.140563	0.0282146	0.0064295
ENSG00000134909	rs525988:128962862:G:A	127906	23	25	0.131579	2.69789e-06	0.141578	0.0283195	0.00616218
ENSG00000134909	rs554794:128964425:T:C	129469	27	29	0.152632	1.05089e-05	0.128736	0.0276236	0.0163138
ENSG00000134909	rs506803:128969253:C:T	134297	21	23	0.121053	6.62456e-06	0.139135	0.0291271	0.011666
ENSG00000134909	rs491444:128973763:A:C	138807	26	28	0.147368	5.28241e-06	0.133906	0.0277043	0.00980252
ENSG00000134909	rs627518:128976533:G:A	141577	21	23	0.121053	6.51334e-06	0.139292	0.0291342	0.011528
ENSG00000134909	rs597558:128990889:C:T	155933	23	25	0.131579	3.08287e-06	0.141519	0.0284941	0.00665628
ENSG00000134909	rs572356:128991859:T:A	156903	23	25	0.131579	3.10573e-06	0.14153	0.0285067	0.00668977
ENSG00000134909	rs34358416:128993935:C:CT	158979	23	25	0.131579	3.15411e-06	0.141544	0.0285313	0.0067585
ENSG00000134909	rs540044:128994182:C:T	159226	23	25	0.131579	3.15411e-06	0.141544	0.0285313	0.0067585
ENSG00000134909	rs654324:128994350:T:C	159394	23	25	0.131579	3.15411e-06	0.141544	0.0285313	0.0067585
ENSG00000134909	rs594001:128998080:T:C	163124	23	25	0.131579	3.15411e-06	0.141544	0.0285313	0.0067585
ENSG00000134909	rs471050:129004655:C:G	169699	23	25	0.131579	3.20318e-06	0.141485	0.0285413	0.00683067
ENSG00000134909	rs596512:129005604:A:G	170648	23	25	0.131579	3.20318e-06	0.141485	0.0285413	0.00683067
ENSG00000134909	rs556620:129011675:G:A	176719	23	25	0.131579	3.20318e-06	0.141485	0.0285413	0.00683067
ENSG00000134909	rs76691768:129014296:TC:T	179340	23	25	0.131579	3.22952e-06	0.141487	0.0285532	0.00686165
ENSG00000134909	rs607572:129015643:T:C	180687	23	25	0.131579	4.59736e-06	0.139707	0.0286994	0.00882999
ENSG00000134909	rs577999:129020979:T:C	186023	23	25	0.131579	4.59736e-06	0.139707	0.0286994	0.00882999
ENSG00000134909	rs115526613:129023372:T:G	188416	23	25	0.131579	3.22952e-06	0.141487	0.0285532	0.00686165
ENSG00000134909	rs59278586:129023932:G:GA	188976	24	26	0.136842	6.85141e-06	0.134905	0.0282917	0.0119153
ENSG00000134909	rs61612151:129025595:C:CAA	190639	23	25	0.131579	3.74437e-06	0.141402	0.0287476	0.00763984
ENSG00000134909	rs507643:129026963:T:C	192007	23	25	0.131579	5.07651e-06	0.139402	0.0287825	0.00949898
ENSG00000134909	rs479912:129027643:C:T	192687	23	25	0.131579	5.23038e-06	0.13934	0.0288139	0.00973015
ENSG00000134909	rs148102220:129028904:T:C	193948	21	23	0.121053	3.93159e-06	0.140893	0.0287145	0.00789497
ENSG00000134909	rs145032611:129030747:T:C	195791	21	23	0.121053	6.24592e-06	0.138611	0.0289281	0.0111543
ENSG00000134909	rs201277478:129037255:AC:A	202299	21	23	0.121053	7.35464e-06	0.137797	0.0290064	0.0125026
ENSG00000134909	rs2511816:129039997:G:A	205041	21	23	0.121053	5.29726e-06	0.139511	0.0288681	0.00982256
ENSG00000134909	rs1622819:129043111:T:C	208155	21	23	0.121053	7.49547e-06	0.137688	0.0290127	0.0126762
ENSG00000134909	rs1616316:129043132:A:G	208176	21	23	0.121053	7.49547e-06	0.137688	0.0290127	0.0126762
ENSG00000134909	rs139984582:129047050:A:G	212094	21	23	0.121053	7.49547e-06	0.137688	0.0290127	0.0126762
ENSG00000134909	rs2511813:129052245:T:C	217289	21	23	0.121053	7.63967e-06	0.137578	0.0290188	0.0128523
ENSG00000134909	rs2439792:129054536:A:G	219580	21	23	0.121053	7.60643e-06	0.13761	0.0290187	0.0128075
ENSG00000134909	rs2439794:129057552:C:T	222596	21	23	0.121053	5.37684e-06	0.139433	0.0288742	0.00993785
ENSG00000134909	rs1473300:129060826:T:C	225870	21	23	0.121053	7.75349e-06	0.137498	0.0290248	0.0129831
ENSG00000134909	rs2439795:129060969:G:A	226013	21	23	0.121053	7.72711e-06	0.138016	0.0291287	0.0129522
ENSG00000134909	rs2197140:129071766:T:C	236810	21	23	0.121053	5.67733e-06	0.139128	0.0288921	0.0103822
ENSG00000134909	rs2197141:129074856:T:A	239900	21	23	0.121053	7.99108e-06	0.137331	0.029036	0.0133026
ENSG00000134909	rs2439802:129077112:G:A	242156	21	23	0.121053	8.05616e-06	0.137298	0.0290417	0.0133838
ENSG00000134909	rs2511817:129078271:G:A	243315	21	23	0.121053	6.53428e-06	0.138309	0.0289333	0.0115547
ENSG00000134909	rs2119869:129082647:T:G	247691	21	23	0.121053	9.24263e-06	0.13647	0.02908	0.0147792
ENSG00000134909	rs2439803:129083967:A:G	249011	21	23	0.121053	9.12093e-06	0.136651	0.0290977	0.0146339
ENSG00000134909	rs113323980:129086544:C:T	251588	22	24	0.126316	1.93164e-06	0.143495	0.0282428	0.00488589
ENSG00000134909	rs59421910:129087386:T:C	252430	21	23	0.121053	7.01214e-06	0.137905	0.0289561	0.0120871
ENSG00000134909	rs56869840:129089868:T:A	254912	21	23	0.121053	7.04808e-06	0.137851	0.0289526	0.0121358
ENSG00000134909	rs60822630:129092082:T:A	257126	21	23	0.121053	7.42606e-06	0.137511	0.028961	0.0125847
ENSG00000134909	rs7939579:129097027:G:A	262071	21	23	0.121053	8.68266e-06	0.13648	0.0289844	0.014121
ENSG00000134909	rs9888163:129099667:A:G	264711	22	24	0.126316	3.66994e-06	0.139992	0.0284323	0.0075323
ENSG00000134909	rs9888242:129100040:G:C	265084	22	24	0.126316	3.66994e-06	0.139992	0.0284323	0.0075323
ENSG00000134909	rs9888254:129100270:C:T	265314	21	23	0.121053	8.85045e-06	0.136347	0.0289859	0.0143158
ENSG00000134909	rs61911040:129107428:G:C	272472	22	24	0.126316	1.39789e-05	0.132275	0.0288335	0.0199268
ENSG00000134909	rs145875723:129149659:C:A	314703	18	19	0.1	4.96251e-05	0.140354	0.0329777	0.046489
ENSG00000134909	rs61912963:129152313:C:T	317357	18	19	0.1	4.96154e-05	0.140304	0.0329655	0.0464812
ENSG00000196323	rs2562249:129723106:A:G	-373467	32	37	0.194737	4.47372e-05	-0.0725113	0.0169272	0.043366
ENSG00000120451	rs2282528:130749715:A:G	4383	37	41	0.215789	4.25553e-05	0.109187	0.0254099	0.0419879
ENSG00000120451	rs2298566:130750642:A:C	5310	37	41	0.215789	4.25553e-05	0.109187	0.0254099	0.0419879
ENSG00000120451	rs948085	7235	37	41	0.215789	4.25553e-05	0.109187	0.0254099	0.0419879
ENSG00000120451	rs7110591	26330	51	58	0.305263	1.42255e-05	-0.106512	0.0232402	0.0201704
ENSG00000120451	rs4586174:130776646:T:A	31314	40	45	0.236842	2.34363e-05	0.109107	0.0244963	0.0284418
ENSG00000120451	rs1781:130780015:C:T	34683	59	74	0.389474	4.14322e-05	-0.0901933	0.0209551	0.0412773
ENSG00000120451	rs3838800:130783817:AC:A	38485	40	45	0.236842	2.13086e-05	0.10984	0.0245245	0.0267651
ENSG00000120451	rs3751037:130784754:C:G	39422	48	53	0.278947	5.17436e-05	-0.105846	0.0249352	0.0478128
ENSG00000120451	rs3751036:130784971:C:G	39639	40	45	0.236842	2.3093e-05	0.109334	0.0245259	0.0281713
ENSG00000151498	rs12180	-7265	44	54	0.284211	3.43061e-06	-0.0814588	0.0164886	0.00719182
ENSG00000151498	rs570113:134122250:C:T	-1140	47	58	0.305263	3.12651e-06	-0.0811318	0.0163468	0.00672164
ENSG00000151498	rs473041:134126612:T:C	3222	46	57	0.3	9.21939e-07	-0.0844368	0.0160561	0.00285625
ENSG00000151498	rs11306396:134128686:GC:G	5296	46	57	0.3	9.16329e-07	-0.0844894	0.0160617	0.00284497
ENSG00000151498	rs561945:134132559:G:A	9169	46	57	0.3	8.82425e-07	-0.0846704	0.0160686	0.00276211
ENSG00000151498	rs514417:134136920:G:A	13530	46	57	0.3	8.64814e-07	-0.0847849	0.0160757	0.0027268
ENSG00000151498	rs554874:134142530:G:A	19140	46	57	0.3	7.13667e-07	-0.0856715	0.0161042	0.00238384
ENSG00000151498	rs529419:134142949:G:A	19559	46	57	0.3	6.66968e-07	-0.0859872	0.0161149	0.00229264
ENSG00000151498	rs486119:134143420:A:G	20030	46	57	0.3	6.44922e-07	-0.0862046	0.0161316	0.00223141
ENSG00000166105	rs470957:133985785:A:G	-158355	49	64	0.336842	4.83129e-06	0.201406	0.041479	0.00916228
ENSG00000166105	rs35677345:134006037:T:TAGAC	-138103	49	64	0.336842	4.73261e-06	0.201357	0.0414251	0.00903211
ENSG00000166105	rs655627:134021859:G:A	-122281	55	74	0.389474	1.49046e-05	0.185492	0.0405792	0.0208023
ENSG00000166105	rs7946486:134075293:T:G	-68847	49	64	0.336842	3.41585e-06	0.200535	0.0405828	0.00717293
ENSG00000166105	rs1551184	-58369	50	67	0.352632	1.32099e-07	0.217755	0.0381106	0.00072534
ENSG00000166105	rs2010438:134092051:T:A	-52089	50	67	0.352632	1.23026e-07	0.219602	0.0383243	0.000689397
ENSG00000166105	rs12180	-28015	44	54	0.284211	6.0781e-10	-0.277077	0.0401241	2.41451e-05
ENSG00000166105	rs570113:134122250:C:T	-21890	47	58	0.305263	1.51955e-09	-0.26968	0.0402038	4.05935e-05
ENSG00000166105	rs473041:134126612:T:C	-17528	46	57	0.3	4.1471e-09	-0.262277	0.0404179	7.02018e-05
ENSG00000166105	rs11306396:134128686:GC:G	-15454	46	57	0.3	4.20706e-09	-0.262297	0.0404405	7.08607e-05
ENSG00000166105	rs561945:134132559:G:A	-11581	46	57	0.3	4.20949e-09	-0.26251	0.0404741	7.08662e-05
ENSG00000166105	rs514417:134136920:G:A	-7220	46	57	0.3	4.29803e-09	-0.262553	0.0405092	7.20328e-05
ENSG00000166105	rs554874:134142530:G:A	-1610	46	57	0.3	4.86627e-09	-0.262782	0.0407155	7.96153e-05
ENSG00000166105	rs529419:134142949:G:A	-1191	46	57	0.3	4.87116e-09	-0.263136	0.0407718	7.96566e-05
ENSG00000166105	rs486119:134143420:A:G	-720	46	57	0.3	5.10323e-09	-0.263212	0.0408482	8.19401e-05
ENSG00000166105	rs10894792:134153418:G:T	9278	27	29	0.152632	3.28701e-05	-0.264958	0.060695	0.0353042
ENSG00000166105	rs1837566:134168519:C:A	24379	26	27	0.142105	3.53325e-05	-0.283129	0.0651421	0.0370615
ENSG00000166105	rs1595895:134168806:T:C	24666	26	27	0.142105	3.50679e-05	-0.283269	0.0651445	0.0368747
ENSG00000134247	rs7552382:117523001:A:G	70321	47	59	0.310526	4.37111e-05	0.0626018	0.0145929	0.0427696
ENSG00000134247	rs12067142:117523498:G:A	70818	47	59	0.310526	4.34825e-05	0.0626157	0.0145914	0.0426017
ENSG00000134247	rs6657819:117526905:G:C	74225	64	86	0.452632	3.60612e-08	0.0775877	0.0129117	0.000280571
ENSG00000134247	rs4659049:117528616:A:G	75936	64	86	0.452632	3.99257e-08	0.0772908	0.0129116	0.000293083
ENSG00000134247	rs11464978:117528810:T:TG	76130	64	86	0.452632	4.09263e-08	0.0772198	0.0129118	0.000298865
ENSG00000134247	rs10801922:117529458:G:A	76778	67	88	0.463158	5.50147e-06	0.067287	0.0139505	0.0101271
ENSG00000134247	rs3885:117530273:A:G	77593	64	85	0.447368	7.90489e-08	0.0763079	0.0130859	0.000501013
ENSG00000134247	rs10801923:117530477:G:A	77797	64	85	0.447368	8.02727e-08	0.076259	0.0130854	0.000507814
ENSG00000134247	rs1127655:117530507:C:T	77827	65	86	0.452632	5.51063e-08	0.0776733	0.0131353	0.000377152
ENSG00000134247	rs1127656:117530511:C:T	77831	64	85	0.447368	8.02727e-08	0.076259	0.0130854	0.000507814
ENSG00000134247	rs13951:117531620:G:A	78940	66	87	0.457895	6.74094e-06	0.0660947	0.0138492	0.0118184
ENSG00000134247	rs3829881	79133	64	85	0.447368	9.11984e-08	0.0756839	0.0130519	0.000555243
ENSG00000134247	rs10923191:117531911:A:G	79231	68	94	0.494737	8.75507e-07	0.0696084	0.0132055	0.00274403
ENSG00000134247	rs1127215:117532790:C:T	80110	68	87	0.457895	6.21569e-06	0.0693314	0.0144658	0.0111195
ENSG00000134247	rs35707153:117533010:G:GTTA	80330	64	85	0.447368	1.53099e-07	0.0747187	0.0131552	0.000797863
ENSG00000134247	rs10754333:117534337:G:A	81657	65	86	0.452632	1.4795e-07	0.0754115	0.0132588	0.000779957
ENSG00000134247	rs10801924:117537568:T:C	84888	63	82	0.431579	9.03753e-07	0.0719563	0.0136705	0.00281553
ENSG00000134247	rs2806869:117541855:T:A	89175	63	82	0.431579	1.43575e-06	0.0707331	0.0137277	0.00392577
ENSG00000134247	rs2764852:117546611:T:C	93931	62	81	0.426316	3.57384e-06	0.0677703	0.0137458	0.0074132
ENSG00000134247	rs2806872:117550234:A:T	97554	62	82	0.431579	1.21519e-05	0.0634032	0.0137136	0.0180572
ENSG00000134247	rs2764850	97943	61	81	0.426316	1.21839e-05	0.062878	0.013602	0.0180951
ENSG00000116874	rs11582744:119457404:G:A	-116436	38	41	0.215789	4.99286e-05	-0.0919307	0.0216084	0.0466716
ENSG00000116874	rs7545737:119533823:A:G	-40017	37	38	0.2	4.20152e-05	-0.101478	0.0235972	0.0416891
ENSG00000116874	rs141109311:119535626:G:GGT	-38214	38	40	0.210526	1.3948e-05	-0.102261	0.0222882	0.019895
ENSG00000116874	rs10923716:119536119:C:T	-37721	36	37	0.194737	3.23495e-05	-0.103218	0.0236219	0.0349972
ENSG00000116874	rs61806238:119536378:G:A	-37462	37	38	0.2	3.5669e-05	-0.102283	0.0235468	0.0372888
ENSG00000116874	rs2645303:119555146:G:T	-18694	67	87	0.457895	5.04786e-07	-0.0872796	0.0161577	0.00189044
ENSG00000116874	rs2765541:119558657:G:A	-15183	42	47	0.247368	2.75427e-05	0.0883125	0.0200171	0.031265
ENSG00000116874	rs2765542:119560326:T:A	-13514	40	44	0.231579	1.91157e-05	-0.0925618	0.0205375	0.0248626
ENSG00000116874	rs2645305:119561365:A:G	-12475	41	46	0.242105	2.63071e-05	-0.0884729	0.019999	0.0304178
ENSG00000116874	rs2794310:119561930:C:G	-11910	40	45	0.236842	2.35171e-05	-0.0887959	0.01994	0.0285142
ENSG00000116874	rs2765543:119563411:G:A	-10429	37	39	0.205263	8.65764e-08	-0.122199	0.0210305	0.000539187
ENSG00000116874	rs2645291:119572541:C:T	-1299	67	88	0.463158	6.58671e-07	-0.0854744	0.0160099	0.00227037
ENSG00000116874	rs2645292:119573194:C:T	-646	40	45	0.236842	3.38107e-05	-0.0872087	0.0200114	0.0360341
ENSG00000116874	rs12086:119573860:T:C	20	31	32	0.168421	1.08426e-07	-0.13221	0.0229569	0.000623826
ENSG00000116874	rs1057991:119575170:C:A	1330	40	45	0.236842	3.45035e-05	-0.0871165	0.0200148	0.036449
ENSG00000116874	rs1057990:119575232:T:C	1392	40	45	0.236842	3.45035e-05	-0.0871165	0.0200148	0.036449
ENSG00000116874	rs1891141:119577410:T:C	3570	42	47	0.247368	2.57777e-05	0.0883821	0.0199545	0.0299652
ENSG00000116874	rs2794315:119577666:G:T	3826	67	87	0.457895	7.35424e-07	-0.0861697	0.0162196	0.00243311
ENSG00000116874	rs2247883:119577837:A:T	3997	67	87	0.457895	7.35051e-07	-0.0861696	0.0162192	0.00243235
ENSG00000116874	rs11285792:119579945:AC:A	6105	40	45	0.236842	3.43661e-05	-0.08711	0.0200085	0.0363489
ENSG00000116874	rs2794314:119581404:G:A	7564	40	45	0.236842	3.40897e-05	-0.0871333	0.020004	0.0361604
ENSG00000116874	rs2765529:119581900:C:T	8060	40	45	0.236842	3.40897e-05	-0.0871333	0.020004	0.0361604
ENSG00000116874	rs2645295:119582448:G:A	8608	40	45	0.236842	3.40897e-05	-0.0871333	0.020004	0.0361604
ENSG00000116874	rs1325938:119582642:C:T	8802	40	45	0.236842	3.40897e-05	-0.0871333	0.020004	0.0361604
ENSG00000116874	rs1325939:119583968:T:A	10128	42	47	0.247368	2.57777e-05	0.0883821	0.0199545	0.0299652
ENSG00000116874	rs2765530:119584396:G:A	10556	40	45	0.236842	3.40897e-05	-0.0871333	0.020004	0.0361604
ENSG00000116874	rs2765531:119585497:A:G	11657	40	45	0.236842	3.40897e-05	-0.0871333	0.020004	0.0361604
ENSG00000116874	rs1325940:119586687:G:A	12847	40	45	0.236842	3.40897e-05	-0.0871333	0.020004	0.0361604
ENSG00000116874	rs2794313:119587440:T:C	13600	40	45	0.236842	3.40897e-05	-0.0871333	0.020004	0.0361604
ENSG00000116874	rs2645302:119590398:A:C	16558	40	46	0.242105	4.01722e-05	-0.0839372	0.0194644	0.0404744
ENSG00000116874	rs2645301:119590420:C:T	16580	40	45	0.236842	3.40897e-05	-0.0871333	0.020004	0.0361604
ENSG00000116874	rs2794312:119591046:C:T	17206	40	45	0.236842	3.45035e-05	-0.0871165	0.0200148	0.036449
ENSG00000116874	rs144042341:119591435:T:TCC	17595	40	45	0.236842	3.45035e-05	-0.0871165	0.0200148	0.036449
ENSG00000116874	rs2765532:119591546:T:C	17706	40	45	0.236842	3.45035e-05	-0.0871165	0.0200148	0.036449
ENSG00000116874	rs56708249:119593205:C:G	19365	40	45	0.236842	3.40897e-05	-0.0871333	0.020004	0.0361604
ENSG00000116874	rs17023171	19428	40	45	0.236842	3.40897e-05	-0.0871333	0.020004	0.0361604
ENSG00000116874	rs17023174:119593301:T:C	19461	40	45	0.236842	3.40897e-05	-0.0871333	0.020004	0.0361604
ENSG00000116874	rs12072640:119593644:A:G	19804	41	46	0.242105	4.44394e-05	-0.0859069	0.020046	0.0431701
ENSG00000116874	rs12073744:119593659:T:A	19819	41	46	0.242105	4.44394e-05	-0.0859069	0.020046	0.0431701
ENSG00000116874	rs12072768:119593918:A:G	20078	41	47	0.247368	5.09267e-05	-0.0828501	0.0194983	0.0472798
ENSG00000116874	rs12077366:119593959:G:A	20119	41	47	0.247368	5.09267e-05	-0.0828501	0.0194983	0.0472798
ENSG00000116874	rs7532510:119594236:A:G	20396	37	39	0.205263	8.8495e-08	-0.122018	0.0210175	0.000547793
ENSG00000116874	1:119594385:ATTTT:A	20545	40	46	0.242105	5.29514e-05	-0.0829536	0.0195708	0.0485551
ENSG00000116874	rs2794311:119595949:C:T	22109	41	47	0.247368	5.09267e-05	-0.0828501	0.0194983	0.0472798
ENSG00000116874	rs2765533:119597395:T:C	23555	41	46	0.242105	4.4966e-05	-0.0858907	0.0200569	0.0435335
ENSG00000116874	rs2765534:119597792:A:C	23952	41	46	0.242105	4.4966e-05	-0.0858907	0.0200569	0.0435335
ENSG00000116874	rs144102861:119599159:AAT:A	25319	42	48	0.252632	2.97073e-05	-0.0850761	0.0193706	0.0329526
ENSG00000116874	rs61808892:119599207:C:T	25367	41	47	0.247368	5.09267e-05	-0.0828501	0.0194983	0.0472798
ENSG00000116874	rs12088921:119599970:C:T	26130	41	47	0.247368	5.09267e-05	-0.0828501	0.0194983	0.0472798
ENSG00000116874	rs146862216:119600175:G:A	26335	30	31	0.163158	1.099e-07	-0.133206	0.0231423	0.000630368
ENSG00000116874	rs10923740:119600287:C:T	26447	37	39	0.205263	8.00925e-08	-0.122141	0.0209565	0.000507055
ENSG00000116874	rs6668960:119600812:C:T	26972	41	47	0.247368	4.95539e-05	-0.0829455	0.0194872	0.0464443
ENSG00000116874	rs6692754:119601020:G:A	27180	41	46	0.242105	4.44211e-05	-0.0859217	0.0200489	0.0431685
ENSG00000116874	rs376545835:119601031:TA:T	27191	41	47	0.247368	4.81795e-05	-0.0852668	0.0199972	0.0455554
ENSG00000116874	rs6669254:119601091:C:T	27251	41	47	0.247368	3.56819e-05	-0.0859246	0.0197813	0.0372888
ENSG00000116874	rs367820716:119601139:A:T	27299	41	47	0.247368	3.58811e-05	-0.0859254	0.0197882	0.0374191
ENSG00000116874	rs372700739:119601168:G:A	27328	41	47	0.247368	3.58811e-05	-0.0859254	0.0197882	0.0374191
ENSG00000116874	rs375475594:119601177:C:T	27337	41	47	0.247368	3.58811e-05	-0.0859254	0.0197882	0.0374191
ENSG00000116874	rs2361269:119602215:A:G	28375	41	47	0.247368	5.09267e-05	-0.0828501	0.0194983	0.0472798
ENSG00000116874	rs2645300:119603067:C:A	29227	41	47	0.247368	5.09267e-05	-0.0828501	0.0194983	0.0472798
ENSG00000116874	rs2361270:119603322:T:C	29482	41	47	0.247368	5.10904e-05	-0.0828585	0.0195042	0.0473873
ENSG00000116874	rs2361271:119603405:A:G	29565	41	47	0.247368	5.10904e-05	-0.0828585	0.0195042	0.0473873
ENSG00000116874	rs2361272:119603417:T:C	29577	41	46	0.242105	4.45844e-05	-0.0859165	0.0200523	0.0432561
ENSG00000116874	rs2361273:119603700:A:T	29860	41	47	0.247368	5.10904e-05	-0.0828585	0.0195042	0.0473873
ENSG00000116874	rs10923741:119604473:A:T	30633	41	47	0.247368	5.10904e-05	-0.0828585	0.0195042	0.0473873
ENSG00000116874	rs10802073:119604655:T:C	30815	41	47	0.247368	5.10904e-05	-0.0828585	0.0195042	0.0473873
ENSG00000116874	rs1343723:119605054:A:T	31214	41	46	0.242105	4.45844e-05	-0.0859165	0.0200523	0.0432561
ENSG00000116874	rs55857499:119608257:CA:C	34417	42	45	0.236842	4.43008e-05	-0.0922415	0.02152	0.0431358
ENSG00000116874	rs17023185:119610787:C:T	36947	34	36	0.189474	1.46668e-07	-0.121697	0.0213891	0.000776846
ENSG00000116874	rs6662165:119614071:T:G	40231	34	35	0.184211	3.02645e-07	-0.124512	0.0225495	0.00131443
ENSG00000116874	rs12086549:119614337:A:T	40497	35	37	0.194737	1.2404e-07	-0.121744	0.0212535	0.000692834
ENSG00000116874	rs12081585:119615956:A:C	42116	33	34	0.178947	2.45283e-07	-0.126063	0.0226297	0.00114347
ENSG00000116874	rs7525871:119621894:T:C	48054	35	37	0.194737	1.2404e-07	-0.121744	0.0212535	0.000692834
ENSG00000116874	rs10802075:119627227:C:T	53387	34	35	0.184211	3.40605e-07	-0.124435	0.0226487	0.00144506
ENSG00000116874	rs61808897:119638200:C:T	64360	28	29	0.152632	1.11118e-06	-0.124752	0.0239254	0.00328004
ENSG00000116874	rs12064109:119642296:T:C	68456	33	34	0.178947	1.11583e-06	-0.120019	0.0230222	0.00329068
ENSG00000116874	rs61808932:119643820:T:C	69980	35	38	0.2	4.05845e-05	-0.0936431	0.0217288	0.0407079
ENSG00000116874	rs12079257:119648309:C:T	74469	37	43	0.226316	1.0848e-05	-0.0897168	0.0192844	0.0167039
ENSG00000116874	rs10923750:119650795:T:G	76955	37	43	0.226316	1.08958e-05	-0.0896925	0.0192838	0.0167553
ENSG00000116874	rs10923754	94800	37	43	0.226316	1.19144e-05	-0.0891713	0.019266	0.0178417
ENSG00000116874	rs10923756:119674648:A:T	100808	37	43	0.226316	1.20246e-05	-0.0891457	0.0192703	0.0179591
ENSG00000116874	rs12085308:119677553:T:C	103713	37	43	0.226316	1.19144e-05	-0.0891713	0.019266	0.0178417
ENSG00000116874	rs3936018:119682370:T:C	108530	32	33	0.173684	3.52287e-06	-0.11557	0.0234242	0.00732868
ENSG00000116874	rs3934789:119683063:G:A	109223	37	43	0.226316	1.17833e-05	-0.0892678	0.0192752	0.017701
ENSG00000116874	rs12096448:119683390:G:A	109550	37	43	0.226316	1.17702e-05	-0.0892857	0.0192778	0.0176942
ENSG00000116874	rs4508058:119684250:T:C	110410	37	43	0.226316	1.17702e-05	-0.0892857	0.0192778	0.0176942
ENSG00000116874	rs12081198:119686104:A:C	112264	37	43	0.226316	1.17702e-05	-0.0892857	0.0192778	0.0176942
ENSG00000116874	rs12081327:119686358:A:G	112518	37	43	0.226316	1.17702e-05	-0.0892857	0.0192778	0.0176942
ENSG00000116874	rs55696509:119686656:A:G	112816	30	31	0.163158	1.51305e-06	-0.121205	0.0235812	0.00408474
ENSG00000116874	rs12086686:119689084:T:A	115244	37	43	0.226316	1.17702e-05	-0.0892857	0.0192778	0.0176942
ENSG00000116874	rs12085616:119689148:A:C	115308	37	43	0.226316	1.17702e-05	-0.0892857	0.0192778	0.0176942
ENSG00000116874	rs58451339:119691593:G:A	117753	37	43	0.226316	1.17702e-05	-0.0892857	0.0192778	0.0176942
ENSG00000116874	rs10923759:119692194:G:A	118354	37	43	0.226316	1.17702e-05	-0.0892857	0.0192778	0.0176942
ENSG00000116874	rs12097967:119702913:A:G	129073	37	43	0.226316	1.17951e-05	-0.0892885	0.0192807	0.0177129
ENSG00000116874	rs11811859:119707680:A:G	133840	37	44	0.231579	1.06539e-05	-0.0873941	0.0187667	0.0164864
ENSG00000116874	rs56234947:119707744:G:A	133904	37	43	0.226316	1.16599e-05	-0.089489	0.0193117	0.0175897
ENSG00000116874	rs6677107:119708765:C:T	134925	37	43	0.226316	1.1556e-05	-0.0894973	0.019304	0.0174832
ENSG00000116874	rs12064033:119709558:G:A	135718	37	43	0.226316	1.1556e-05	-0.0894973	0.019304	0.0174832
ENSG00000116874	rs12064137:119709749:G:A	135909	37	43	0.226316	1.1556e-05	-0.0894973	0.019304	0.0174832
ENSG00000116874	rs61806977:119711192:G:C	137352	37	43	0.226316	1.15865e-05	-0.0895005	0.0193075	0.0175144
ENSG00000116874	rs11484959:119712630:A:G	138790	37	43	0.226316	1.1556e-05	-0.0894973	0.019304	0.0174832
ENSG00000116874	rs61806978:119713215:A:G	139375	37	43	0.226316	1.1556e-05	-0.0894973	0.019304	0.0174832
ENSG00000116874	rs56195272:119713997:A:T	140157	37	43	0.226316	1.1556e-05	-0.0894973	0.019304	0.0174832
ENSG00000116874	rs11484961:119714454:G:A	140614	37	43	0.226316	1.1556e-05	-0.0894973	0.019304	0.0174832
ENSG00000116874	rs61806980:119715438:G:A	141598	37	43	0.226316	1.1556e-05	-0.0894973	0.019304	0.0174832
ENSG00000116874	rs11800694:119716054:T:C	142214	37	43	0.226316	1.1556e-05	-0.0894973	0.019304	0.0174832
ENSG00000116874	rs114227037:119717099:C:T	143259	37	43	0.226316	1.1556e-05	-0.0894973	0.019304	0.0174832
ENSG00000116874	rs28798146:119717797:G:A	143957	37	43	0.226316	1.1556e-05	-0.0894973	0.019304	0.0174832
ENSG00000116874	rs55781753:119718264:T:C	144424	37	43	0.226316	1.1556e-05	-0.0894973	0.019304	0.0174832
ENSG00000116874	rs12080051:119718724:C:A	144884	37	43	0.226316	1.19873e-05	-0.0891503	0.019268	0.0179174
ENSG00000116874	rs12069824:119719099:G:A	145259	37	43	0.226316	1.1556e-05	-0.0894973	0.019304	0.0174832
ENSG00000116874	rs61806982:119719686:T:C	145846	37	43	0.226316	1.1556e-05	-0.0894973	0.019304	0.0174832
ENSG00000116874	rs12067751:119720439:A:G	146599	37	43	0.226316	1.16546e-05	-0.0894746	0.0193081	0.0175866
ENSG00000116874	rs113721143:119722575:AAGC:A	148735	37	43	0.226316	1.1556e-05	-0.0894973	0.019304	0.0174832
ENSG00000116874	rs12065809:119724535:A:T	150695	37	43	0.226316	1.1556e-05	-0.0894973	0.019304	0.0174832
ENSG00000116874	rs11484962:119725186:G:A	151346	37	43	0.226316	1.1556e-05	-0.0894973	0.019304	0.0174832
ENSG00000116874	rs55836852:119725401:G:A	151561	37	43	0.226316	1.1556e-05	-0.0894973	0.019304	0.0174832
ENSG00000116874	rs66715579:119725432:G:A	151592	37	43	0.226316	1.1556e-05	-0.0894973	0.019304	0.0174832
ENSG00000116874	rs11487668:119726796:T:C	152956	37	43	0.226316	1.1556e-05	-0.0894973	0.019304	0.0174832
ENSG00000116874	rs10923766:119726932:G:A	153092	37	43	0.226316	1.1556e-05	-0.0894973	0.019304	0.0174832
ENSG00000116874	rs61806983:119731524:G:C	157684	37	43	0.226316	1.15459e-05	-0.0895132	0.0193065	0.0174832
ENSG00000116874	rs10923767:119732347:C:T	158507	38	44	0.231579	5.55953e-06	-0.0925595	0.0192006	0.0102084
ENSG00000116874	rs12087987:119734821:C:A	160981	37	43	0.226316	1.13803e-05	-0.0896206	0.0193144	0.0173045
ENSG00000116874	rs60231452:119742862:G:A	169022	37	43	0.226316	1.13966e-05	-0.089638	0.0193196	0.0173246
ENSG00000116874	rs61319010:119743011:T:A	169171	37	43	0.226316	1.14266e-05	-0.0896413	0.0193231	0.0173581
ENSG00000116874	rs60561350:119743014:GTA:G	169174	37	43	0.226316	1.13966e-05	-0.089638	0.0193196	0.0173246
ENSG00000116874	rs67391130:119743174:T:C	169334	37	42	0.221053	6.07155e-06	-0.0941257	0.019615	0.0109071
ENSG00000116874	rs12083510:119746620:T:G	172780	37	43	0.226316	1.11232e-05	-0.0899137	0.0193532	0.017001
ENSG00000116874	rs61472280:119749911:GT:G	176071	37	43	0.226316	1.10519e-05	-0.0899355	0.0193511	0.0169115
ENSG00000116874	rs4590715:119750201:C:T	176361	37	43	0.226316	1.10519e-05	-0.0899355	0.0193511	0.0169115
ENSG00000116874	rs12092807:119750644:G:A	176804	37	43	0.226316	1.10519e-05	-0.0899355	0.0193511	0.0169115
ENSG00000116874	rs9662220:119751653:G:A	177813	37	43	0.226316	1.10519e-05	-0.0899355	0.0193511	0.0169115
ENSG00000116874	rs12092428:119753536:A:C	179696	37	43	0.226316	1.09791e-05	-0.0899733	0.0193523	0.0168342
ENSG00000116874	rs12089385:119757245:A:C	183405	37	43	0.226316	1.09734e-05	-0.0899864	0.0193545	0.0168286
ENSG00000116874	rs72691108:119762175:G:A	188335	33	34	0.178947	3.4804e-06	-0.115462	0.0233882	0.00726141
ENSG00000116874	rs7542832:119762729:T:C	188889	38	44	0.231579	1.17599e-05	-0.0895328	0.0193303	0.0176942
ENSG00000231365	rs2765543:119563411:G:A	-119609	37	39	0.205263	2.21646e-06	-0.187895	0.0372267	0.00537738
ENSG00000231365	rs7532510:119594236:A:G	-88784	37	39	0.205263	2.25489e-06	-0.187613	0.0372017	0.00544039
ENSG00000231365	rs10923740:119600287:C:T	-82733	37	39	0.205263	2.37572e-06	-0.186893	0.0371526	0.00562103
ENSG00000231365	rs17023185:119610787:C:T	-72233	34	36	0.189474	2.81206e-06	-0.188323	0.0377463	0.00633297
ENSG00000231365	rs12086549:119614337:A:T	-68683	35	37	0.194737	1.70643e-06	-0.191035	0.0373784	0.00445438
ENSG00000231365	rs7525871:119621894:T:C	-61126	35	37	0.194737	1.70643e-06	-0.191035	0.0373784	0.00445438
ENSG00000231365	rs12079257:119648309:C:T	-34711	37	43	0.226316	2.41882e-06	-0.163309	0.0324926	0.0057007
ENSG00000231365	rs10923750:119650795:T:G	-32225	37	43	0.226316	2.42523e-06	-0.16328	0.0324911	0.00570578
ENSG00000231365	rs10923754	-14380	37	43	0.226316	2.575e-06	-0.162605	0.0324513	0.00594904
ENSG00000231365	rs10923756:119674648:A:T	-8372	37	43	0.226316	2.61328e-06	-0.162533	0.0324604	0.00601766
ENSG00000231365	rs12085308:119677553:T:C	-5467	37	43	0.226316	2.575e-06	-0.162605	0.0324513	0.00594904
ENSG00000231365	rs4508061:119681589:C:T	-1431	43	54	0.284211	1.831e-05	-0.132625	0.0293542	0.024107
ENSG00000231365	rs3934789:119683063:G:A	43	37	43	0.226316	2.51328e-06	-0.162852	0.0324622	0.00584827
ENSG00000231365	rs12096448:119683390:G:A	370	37	43	0.226316	2.48608e-06	-0.162944	0.0324634	0.00580647
ENSG00000231365	rs4508058:119684250:T:C	1230	37	43	0.226316	2.48608e-06	-0.162944	0.0324634	0.00580647
ENSG00000231365	rs12081198:119686104:A:C	3084	37	43	0.226316	2.48608e-06	-0.162944	0.0324634	0.00580647
ENSG00000231365	rs12081327:119686358:A:G	3338	37	43	0.226316	2.48608e-06	-0.162944	0.0324634	0.00580647
ENSG00000231365	rs12086686:119689084:T:A	6064	37	43	0.226316	2.48608e-06	-0.162944	0.0324634	0.00580647
ENSG00000231365	rs12085616:119689148:A:C	6128	37	43	0.226316	2.48608e-06	-0.162944	0.0324634	0.00580647
ENSG00000231365	rs58451339:119691593:G:A	8573	37	43	0.226316	2.48608e-06	-0.162944	0.0324634	0.00580647
ENSG00000231365	rs10923759:119692194:G:A	9174	37	43	0.226316	2.48608e-06	-0.162944	0.0324634	0.00580647
ENSG00000231365	rs12097967:119702913:A:G	19893	37	43	0.226316	2.47729e-06	-0.162987	0.0324663	0.00579889
ENSG00000231365	rs11811859:119707680:A:G	24660	37	44	0.231579	1.17759e-05	-0.148892	0.0321484	0.0176943
ENSG00000231365	rs56234947:119707744:G:A	24724	37	43	0.226316	2.29604e-06	-0.163743	0.0324968	0.00551052
ENSG00000231365	rs6677107:119708765:C:T	25745	37	43	0.226316	2.32731e-06	-0.163608	0.0324914	0.00554214
ENSG00000231365	rs12064033:119709558:G:A	26538	37	43	0.226316	2.32731e-06	-0.163608	0.0324914	0.00554214
ENSG00000231365	rs12064137:119709749:G:A	26729	37	43	0.226316	2.32731e-06	-0.163608	0.0324914	0.00554214
ENSG00000231365	rs61806977:119711192:G:C	28172	37	43	0.226316	2.31731e-06	-0.16366	0.0324949	0.00553711
ENSG00000231365	rs11484959:119712630:A:G	29610	37	43	0.226316	2.32731e-06	-0.163608	0.0324914	0.00554214
ENSG00000231365	rs61806978:119713215:A:G	30195	37	43	0.226316	2.32731e-06	-0.163608	0.0324914	0.00554214
ENSG00000231365	rs56195272:119713997:A:T	30977	37	43	0.226316	2.32731e-06	-0.163608	0.0324914	0.00554214
ENSG00000231365	rs11484961:119714454:G:A	31434	37	43	0.226316	2.32731e-06	-0.163608	0.0324914	0.00554214
ENSG00000231365	rs61806980:119715438:G:A	32418	37	43	0.226316	2.32731e-06	-0.163608	0.0324914	0.00554214
ENSG00000231365	rs11800694:119716054:T:C	33034	37	43	0.226316	2.32731e-06	-0.163608	0.0324914	0.00554214
ENSG00000231365	rs114227037:119717099:C:T	34079	37	43	0.226316	2.32731e-06	-0.163608	0.0324914	0.00554214
ENSG00000231365	rs28798146:119717797:G:A	34777	37	43	0.226316	2.32731e-06	-0.163608	0.0324914	0.00554214
ENSG00000231365	rs55781753:119718264:T:C	35244	37	43	0.226316	2.32731e-06	-0.163608	0.0324914	0.00554214
ENSG00000231365	rs12080051:119718724:C:A	35704	37	43	0.226316	1.99459e-06	-0.164196	0.0323667	0.00499969
ENSG00000231365	rs12069824:119719099:G:A	36079	37	43	0.226316	2.32731e-06	-0.163608	0.0324914	0.00554214
ENSG00000231365	rs61806982:119719686:T:C	36666	37	43	0.226316	2.32731e-06	-0.163608	0.0324914	0.00554214
ENSG00000231365	rs12067751:119720439:A:G	37419	37	43	0.226316	2.315e-06	-0.163662	0.0324937	0.00553711
ENSG00000231365	rs113721143:119722575:AAGC:A	39555	37	43	0.226316	2.32731e-06	-0.163608	0.0324914	0.00554214
ENSG00000231365	rs12065809:119724535:A:T	41515	37	43	0.226316	2.32731e-06	-0.163608	0.0324914	0.00554214
ENSG00000231365	rs11484962:119725186:G:A	42166	37	43	0.226316	2.32731e-06	-0.163608	0.0324914	0.00554214
ENSG00000231365	rs55836852:119725401:G:A	42381	37	43	0.226316	2.32731e-06	-0.163608	0.0324914	0.00554214
[truncated: 35,581 more rows]
