# Supplementary material for: Multi-omics colocalization with genome-wide association studies reveals a context-specific genetic mechanism at a childhood onset asthma risk locus
Source: Genome Med. 2021 Oct 10;13:157. doi: 10.1186/s13073-021-00967-y (PMC8504130; doi:10.1186/s13073-021-00967-y)
Supplement: Supplementary file 8 — Additional file 8:. FastQTL meQTL mapping results for vehicle-treated AECs (FDR< 0.05). [file 13073_2021_967_MOESM8_ESM.xlsx]

## Sheet: Legend for Additional File 8
Additional File 8 FastQTL meQTL mapping results for vehicle-treated AECs (FDR<0.05)

## Sheet: Additional File 8
gene_id	variant_id	tss_distance	ma_samples	ma_count	maf	npval	slope	slope_se	fdr
cg00113050	rs807027:102764607:T:A	8292	50	57	0.276699	0.000491467	-0.14921	0.0414221	0.0393156
cg00113050	rs807025:102764821:C:T	8506	50	57	0.276699	0.000529312	-0.147763	0.0412703	0.0413385
cg11336232	rs807023	-2024	37	39	0.18932	0.00013596	0.106074	0.0267358	0.0157794
cg11336232	rs807022:102770327:A:G	-1779	37	39	0.18932	0.000135669	0.107516	0.027095	0.0157574
cg02932204	rs807023	-2932	37	39	0.18932	3.64462e-06	0.325019	0.0663183	0.00111609
cg02932204	rs807022:102770327:A:G	-2687	37	39	0.18932	1.41e-06	0.341618	0.0666038	0.000559454
cg06898576	rs11190810:102821921:C:T	-3280	18	21	0.101942	0.000345909	-0.152037	0.0410429	0.0307486
cg06898576	rs12359843:102824760:G:T	-441	18	21	0.101942	0.000364046	-0.15318	0.0415167	0.0318764
cg07083761	rs11190813:102829164:A:G	-4676	52	63	0.305825	0.000591428	-0.130033	0.0366542	0.0445719
cg17034508	rs72842048:102867522:G:A	-5198	29	31	0.150485	0.000297979	0.270705	0.0722424	0.0276727
cg17034508	rs72842054:102872698:T:C	-22	34	36	0.174757	0.000210643	0.265765	0.0691094	0.0216173
cg17034508	rs72842055:102872723:C:T	3	34	36	0.174757	0.000210643	0.265765	0.0691094	0.0216173
cg17034508	rs144068579:102872954:T:TA	234	34	36	0.174757	0.000241565	0.261076	0.0685795	0.0238391
cg17034508	rs3850698:102872977:C:T	257	34	36	0.174757	0.000235371	0.262257	0.0687569	0.0234095
cg17034508	rs11190831	619	34	36	0.174757	0.000234656	0.261146	0.0684502	0.0233579
cg17034508	rs4553305:102874015:A:G	1295	34	36	0.174757	0.000234656	0.261146	0.0684502	0.0233579
cg17034508	rs75966688:102874193:AT:A	1473	34	36	0.174757	0.000183617	0.266638	0.0686491	0.0195802
cg17034508	rs56972927:102876160:G:A	3440	34	36	0.174757	0.000226211	0.262167	0.0685319	0.0227635
cg17034508	rs57518582:102876720:C:T	4000	34	36	0.174757	0.000224254	0.262374	0.068542	0.0226259
cg17034508	rs58332679:102876954:A:AT	4234	33	35	0.169903	7.50394e-05	0.283446	0.0686416	0.0102799
cg17034508	rs11190833:102877086:C:A	4366	34	36	0.174757	0.000223303	0.262568	0.0685712	0.0225572
cg17034508	rs56050648:102877465:C:A	4745	34	36	0.174757	0.000224661	0.262499	0.0685837	0.0226518
cg17034508	rs11190834:102877576:G:A	4856	34	36	0.174757	0.000220579	0.262901	0.0685961	0.0223541
cg17034508	rs1556865:102877921:A:T	5201	34	36	0.174757	0.000218653	0.263108	0.068606	0.0222109
cg17034508	rs147630770:102878090:C:CCTGAGGA	5370	34	36	0.174757	0.000217175	0.263256	0.0686103	0.0221078
cg17034508	rs79121283:102878255:T:C	5535	34	36	0.174757	0.000213949	0.2636	0.0686247	0.0218631
cg17034508	rs3050335:102878513:CAG:C	5793	34	36	0.174757	0.000210269	0.264009	0.0686439	0.0215893
cg17034508	rs1556864:102878609:T:A	5889	34	36	0.174757	0.000210269	0.264009	0.0686439	0.0215893
cg17034508	rs17756236:102878811:G:A	6091	34	36	0.174757	0.000208743	0.264806	0.0688143	0.0214786
cg17034508	rs11190835:102879620:A:G	6900	35	37	0.179612	0.000180915	0.267949	0.0689129	0.0193657
cg17034508	rs11190836:102879769:G:T	7049	34	36	0.174757	0.000163191	0.271721	0.0693706	0.0179996
cg09549514	rs4919518:102903609:A:G	-710	73	92	0.446602	8.71691e-05	0.0728656	0.0178202	0.0114435
cg09549514	rs2185174:102904349:A:G	30	73	92	0.446602	9.17339e-05	0.0726361	0.0178243	0.0118723
cg09549514	rs6584413:102908243:G:A	3924	72	90	0.436893	0.000209734	0.0696074	0.0180949	0.0215489
cg09549514	rs4919523:102912026:A:G	7707	72	90	0.436893	0.000224875	0.068942	0.0180139	0.0226677
cg09549514	rs4919525:102912303:A:G	7984	73	91	0.441748	0.000128703	0.0718799	0.0180484	0.0151809
cg09549514	rs4919526:102913423:C:T	9104	72	90	0.436893	0.00019927	0.0697182	0.0180563	0.0207672
cg09549514	rs4919527:102913538:G:A	9219	72	90	0.436893	0.000217578	0.0690988	0.0180111	0.0221392
cg24767540	rs11598177:102980156:T:C	-5559	66	88	0.427184	0.000462231	-0.104595	0.0288922	0.0376965
cg06874323	rs11598177:102980156:T:C	-6370	66	88	0.427184	2.42398e-05	0.217361	0.0491011	0.0044845
cg06874323	rs1322332:102982648:T:C	-3878	67	91	0.441748	0.000120478	0.196071	0.0490083	0.0144548
cg06874323	rs1322331	63	67	91	0.441748	0.000121023	0.196014	0.0490094	0.0145009
cg13525448	rs11598177:102980156:T:C	-6446	66	88	0.427184	1.67869e-05	0.172496	0.0381549	0.00341759
cg13525448	rs1322332:102982648:T:C	-3954	67	91	0.441748	6.23839e-05	0.158712	0.0379799	0.00900252
cg13525448	rs1322331	-13	67	91	0.441748	6.22282e-05	0.158731	0.0379782	0.00898552
cg13525448	rs34835363:102991696:C:T	5094	45	49	0.237864	0.000481398	0.185095	0.0512973	0.0387594
cg13525448	rs594791:102995796:T:C	9194	63	84	0.407767	0.000521367	-0.140737	0.039259	0.0409172
cg03393426	rs11190870	-7480	58	75	0.364078	4.10106e-06	0.191372	0.0392788	0.0012124
cg03393426	rs11598177:102980156:T:C	-6531	66	88	0.427184	2.03955e-06	0.192741	0.0382343	0.000735946
cg03393426	rs1322332:102982648:T:C	-4039	67	91	0.441748	5.79358e-06	0.181758	0.0379659	0.00156059
cg03393426	rs1322331	-98	67	91	0.441748	5.76231e-06	0.181796	0.0379632	0.00155494
cg03393426	rs594791:102995796:T:C	9109	63	84	0.407767	8.8413e-06	-0.180879	0.0386281	0.00212902
cg10455940	rs4451650	-8435	50	61	0.296117	4.73014e-06	0.24795	0.0512585	0.00134408
cg10455940	rs35502696:103207641:CT:C	-6066	46	56	0.271845	1.4057e-05	-0.239887	0.0525375	0.00300887
cg10455940	rs11332648:103223705:TA:T	9998	50	61	0.296117	4.13554e-06	0.250046	0.0513431	0.00121902
cg02989471	rs11191048:103319198:C:T	1388	26	28	0.135922	0.000514368	-0.14697	0.0409523	0.0405464
cg02989471	rs79165291:103322738:A:G	4928	26	28	0.135922	0.000505766	-0.14729	0.0409847	0.0400776
cg14053593	rs3127241:103312848:G:C	-8628	67	86	0.417476	0.000138794	-0.103524	0.0261305	0.0160147
cg14053593	rs3127242:103313599:C:T	-7877	67	86	0.417476	0.000136408	-0.103694	0.0261417	0.0158152
cg14053593	rs1045324:103313620:A:G	-7856	67	86	0.417476	0.000138769	-0.103522	0.0261296	0.0160125
cg14053593	rs1045232:103315801:C:T	-5675	67	86	0.417476	0.000138532	-0.103636	0.0261554	0.0159913
cg14053593	rs3127244:103317452:G:A	-4024	67	86	0.417476	0.000138447	-0.103738	0.0261798	0.0159839
cg14053593	rs3095809:103317821:C:A	-3655	67	86	0.417476	0.000141856	-0.103429	0.0261462	0.016265
cg14053593	rs3095808:103318537:A:G	-2939	67	86	0.417476	0.000143431	-0.103382	0.0261545	0.0163979
cg14053593	rs3095807:103318571:C:T	-2905	67	86	0.417476	0.000143431	-0.103382	0.0261545	0.0163979
cg14053593	rs918265:103320396:C:T	-1080	67	86	0.417476	0.000143431	-0.103382	0.0261545	0.0163979
cg14053593	rs918264:103320564:T:C	-912	67	86	0.417476	0.000146258	-0.103305	0.0261707	0.0166315
cg14053593	rs918263:103320642:A:G	-834	67	86	0.417476	0.000146258	-0.103305	0.0261707	0.0166315
cg14053593	rs5787441:103320972:C:CTTGGAGAGG	-504	72	93	0.451456	6.96795e-05	-0.108746	0.0262086	0.00975447
cg14053593	rs1861929:103322336:A:G	860	72	93	0.451456	9.66953e-05	-0.107115	0.0263777	0.0123286
cg14053593	rs4919554:103322670:A:C	1194	72	93	0.451456	9.55918e-05	-0.107177	0.0263727	0.0122273
cg14053593	rs36028818:103326029:G:GC	4553	67	86	0.417476	0.000150799	-0.103229	0.0262078	0.0169934
cg14053593	rs3095804:103326647:G:A	5171	67	86	0.417476	0.000150777	-0.103226	0.0262068	0.016992
cg14053593	rs1861927:103327093:A:G	5617	67	86	0.417476	0.000153603	-0.103147	0.0262209	0.0172179
cg14053593	rs3095803:103328392:G:T	6916	67	86	0.417476	0.00016224	-0.102951	0.0262724	0.0179236
cg14053593	rs11191049:103329015:G:T	7539	72	93	0.451456	0.000109951	-0.106577	0.0264735	0.0135237
cg14053593	rs3127248:103330171:C:T	8695	67	86	0.417476	0.000172773	-0.102716	0.0263303	0.0187323
cg11139010	rs139269301:103358007:T:TA	-5009	13	13	0.0631068	0.000187739	0.29832	0.0769289	0.0199131
cg11139010	rs148500716:103363252:C:T	236	13	13	0.0631068	0.000190531	0.297887	0.0768992	0.0201153
cg07266855	rs10883688:103510393:A:C	-8876	79	103	0.5	0.000390559	0.175206	0.0477499	0.033477
cg07266855	rs10699284:103519378:G:GCAGGC	109	70	87	0.42233	1.466e-05	0.209847	0.0460658	0.00310195
cg07266855	rs749694	515	78	102	0.495146	0.000259604	0.176919	0.0467238	0.0250876
cg07266855	rs10786648:103521325:T:C	2056	70	87	0.42233	1.60925e-05	0.209066	0.046134	0.00332201
cg06262178	rs1044258:103605714:T:C	5108	52	61	0.296117	0.000428416	-0.271255	0.0744725	0.0357656
cg10228989	rs7090198:103608495:G:A	-8	45	48	0.23301	1.78957e-05	0.138577	0.0307631	0.00358401
cg10228989	rs935446:103608860:G:A	357	45	48	0.23301	1.82086e-05	0.138398	0.0307536	0.0036309
cg10228989	rs7918620:103609704:G:T	1201	52	56	0.271845	5.45973e-06	0.141601	0.0294879	0.00149446
cg10228989	rs1530589:103618033:C:T	9530	52	56	0.271845	5.45973e-06	0.141601	0.0294879	0.00149446
cg24362923	rs7906477:103987258:T:A	1396	10	11	0.0533981	3.20338e-05	-0.562283	0.129125	0.0055211
cg16722561	rs56384670:104179219:C:A	-4996	45	49	0.237864	1.11863e-05	-0.165049	0.0356966	0.00254128
cg16722561	rs41287462:104184213:G:A	-2	45	49	0.237864	1.10797e-05	-0.165065	0.0356815	0.00252428
cg16722561	rs11597439:104184953:C:G	738	55	69	0.334951	0.0004511	-0.108944	0.0300346	0.0370673
cg16722561	rs11593146	766	55	69	0.334951	0.000452738	-0.108588	0.0299452	0.037154
cg16722561	rs72845696:104187404:C:T	3189	42	46	0.223301	4.07237e-05	-0.156585	0.0364848	0.006566
cg16722561	rs6584499:104188259:G:T	4044	56	69	0.334951	0.00041266	0.111656	0.0305634	0.0348308
cg24846309	rs3837341:104192184:C:CG	-1206	43	48	0.23301	0.000230401	-0.158248	0.0414229	0.0230575
cg24846309	rs7921010:104192826:G:T	-564	34	37	0.179612	1.20581e-05	-0.200825	0.0436125	0.00268465
cg24846309	rs74878980:104195026:C:CA	1636	24	27	0.131068	0.000158355	-0.192183	0.0489599	0.0176021
cg24846309	rs139914110:104197363:TG:T	3973	24	27	0.131068	0.000161267	-0.191836	0.0489346	0.0178435
cg15685307	rs12570201:104222963:T:C	-5119	78	95	0.461165	1.94408e-05	-0.159485	0.0355716	0.00380934
cg15685307	rs7342070:104223628:T:C	-4454	76	92	0.446602	1.63725e-05	-0.159717	0.0352785	0.00335851
cg15685307	rs7341995:104223831:G:A	-4251	78	95	0.461165	2.48157e-05	-0.15747	0.0356206	0.00456123
cg15685307	rs11591780:104225316:C:G	-2766	79	98	0.475728	0.000363027	-0.132658	0.0359467	0.0318093
cg15685307	rs10883723:104225832:T:C	-2250	50	58	0.281553	8.75847e-07	0.180983	0.0345285	0.000397052
cg15685307	rs11191294:104225837:T:G	-2245	50	58	0.281553	8.75847e-07	0.180983	0.0345285	0.000397052
cg15685307	rs71016381:104226239:CAAA:C	-1843	82	102	0.495146	7.69182e-06	-0.1667	0.0353382	0.00191958
cg15685307	rs11394977:104226408:T:TA	-1674	53	62	0.300971	8.20288e-07	0.178741	0.0340011	0.000378549
cg15685307	rs1984795:104226830:C:T	-1252	82	103	0.5	1.85157e-05	-0.158284	0.0352058	0.00367616
cg15685307	rs2015583:104226983:A:G	-1099	82	103	0.5	1.85157e-05	-0.158284	0.0352058	0.00367616
cg15685307	rs12781718:104227433:G:A	-649	82	103	0.5	2.14616e-05	-0.158398	0.0355302	0.0041047
cg15685307	rs12781742:104227469:G:A	-613	82	103	0.5	1.8408e-05	-0.158587	0.0352617	0.00366054
cg15685307	rs12762305:104227623:C:T	-459	80	101	0.490291	2.41216e-05	-0.15386	0.0347465	0.00446783
cg15685307	rs12763794:104227661:T:C	-421	82	103	0.5	1.86799e-05	-0.158218	0.0352089	0.0036993
cg15685307	rs11593526:104228017:C:A	-65	82	103	0.5	1.81323e-05	-0.158438	0.0351983	0.00361927
cg15685307	rs11593583:104228149:G:A	67	82	103	0.5	1.86799e-05	-0.158218	0.0352089	0.0036993
cg15685307	rs11593589:104228299:C:A	217	82	103	0.5	1.86799e-05	-0.158218	0.0352089	0.0036993
cg15685307	rs35597970:104229057:C:CA	975	82	102	0.495146	8.41939e-06	-0.16606	0.0353713	0.00205491
cg15685307	rs41306870:104229785:C:T	1703	82	103	0.5	1.86799e-05	-0.158218	0.0352089	0.0036993
cg15685307	rs2025712:104230064:T:C	1982	82	103	0.5	1.86799e-05	-0.158218	0.0352089	0.0036993
cg15685307	rs2025713	2074	82	103	0.5	1.86799e-05	-0.158218	0.0352089	0.0036993
cg15685307	rs58061354:104230930:TTCGGTGCTGGG:T	2848	82	103	0.5	2.23652e-05	-0.157436	0.0353984	0.00423103
cg15685307	rs11191295:104231054:A:G	2972	82	103	0.5	1.86799e-05	-0.158218	0.0352089	0.0036993
cg15685307	rs11356476:104231519:GA:G	3437	82	100	0.485437	1.99052e-05	-0.164143	0.0366601	0.00387676
cg15685307	rs7081110:104231651:A:G	3569	82	103	0.5	1.86799e-05	-0.158218	0.0352089	0.0036993
cg15685307	rs7081467:104231662:G:C	3580	82	103	0.5	1.86799e-05	-0.158218	0.0352089	0.0036993
cg15685307	rs3740415:104232716:G:A	4634	82	103	0.5	1.95223e-05	-0.158106	0.0352726	0.00382094
cg15685307	rs3740414:104232809:T:G	4727	82	103	0.5	1.86799e-05	-0.158218	0.0352089	0.0036993
cg15685307	rs11593971:104234090:C:G	6008	77	94	0.456311	4.71877e-05	-0.150678	0.0354288	0.0073207
cg15685307	rs111503247:104234781:G:GC	6699	53	62	0.300971	8.22429e-07	0.178742	0.0340052	0.000379018
cg15685307	rs10883725:104235956:G:C	7874	53	62	0.300971	8.22429e-07	0.178742	0.0340052	0.000379018
cg15685307	rs11595149:104235978:C:T	7896	78	95	0.461165	2.35864e-05	-0.157627	0.0355507	0.00439453
cg15685307	rs10883726:104236276:C:T	8194	53	62	0.300971	8.22429e-07	0.178742	0.0340052	0.000379018
cg15685307	rs1056738:104236481:G:A	8399	52	61	0.296117	2.56681e-06	0.170994	0.0342961	0.000866628
cg15685307	rs1056739:104236542:T:C	8460	53	62	0.300971	8.22429e-07	0.178742	0.0340052	0.000379018
cg15685307	rs1056740:104236552:C:T	8470	53	62	0.300971	8.22429e-07	0.178742	0.0340052	0.000379018
cg15685307	rs1056741:104236640:A:C	8558	53	62	0.300971	9.95107e-07	0.177851	0.0341265	0.000435972
cg15685307	rs1056744	8605	77	94	0.456311	4.71877e-05	-0.150678	0.0354288	0.0073207
cg15685307	rs61873704:104236929:T:C	8847	53	62	0.300971	8.22429e-07	0.178742	0.0340052	0.000379018
cg15685307	rs12569526:104237007:A:G	8925	77	94	0.456311	4.71877e-05	-0.150678	0.0354288	0.0073207
cg14976746	rs12570201:104222963:T:C	-5163	78	95	0.461165	6.28389e-05	-0.203735	0.0487766	0.00904941
cg14976746	rs7342070:104223628:T:C	-4498	76	92	0.446602	0.000108811	-0.196212	0.0487043	0.013422
cg14976746	rs7341995:104223831:G:A	-4295	78	95	0.461165	6.5349e-05	-0.20311	0.0487489	0.00931535
cg14976746	rs11591780:104225316:C:G	-2810	79	98	0.475728	4.8327e-05	-0.20314	0.0478349	0.00745185
cg14976746	rs71016381:104226239:CAAA:C	-1887	82	102	0.495146	2.43877e-05	-0.214403	0.04845	0.00450545
cg14976746	rs11394977:104226408:T:TA	-1718	53	62	0.300971	0.000567254	0.174614	0.0490499	0.0433302
cg14976746	rs1984795:104226830:C:T	-1296	82	103	0.5	2.15386e-05	-0.213105	0.0478113	0.00411545
cg14976746	rs2015583:104226983:A:G	-1143	82	103	0.5	2.15386e-05	-0.213105	0.0478113	0.00411545
cg14976746	rs12781718:104227433:G:A	-693	82	103	0.5	2.74343e-05	-0.212247	0.0482948	0.00491831
cg14976746	rs12781742:104227469:G:A	-657	82	103	0.5	2.18972e-05	-0.213285	0.0478972	0.00416449
cg14976746	rs12762305:104227623:C:T	-503	80	101	0.490291	7.74383e-05	-0.196325	0.0476415	0.0105116
cg14976746	rs12763794:104227661:T:C	-465	82	103	0.5	2.16736e-05	-0.213042	0.0478143	0.00413283
cg14976746	rs11593526:104228017:C:A	-109	82	103	0.5	2.07625e-05	-0.213478	0.047794	0.00400362
cg14976746	rs11593583:104228149:G:A	23	82	103	0.5	2.16736e-05	-0.213042	0.0478143	0.00413283
cg14976746	rs11593589:104228299:C:A	173	82	103	0.5	2.16736e-05	-0.213042	0.0478143	0.00413283
cg14976746	rs35597970:104229057:C:CA	931	82	102	0.495146	2.44945e-05	-0.214374	0.0484557	0.00452053
cg14976746	rs41306870:104229785:C:T	1659	82	103	0.5	2.16736e-05	-0.213042	0.0478143	0.00413283
cg14976746	rs2025712:104230064:T:C	1938	82	103	0.5	2.16736e-05	-0.213042	0.0478143	0.00413283
cg14976746	rs2025713	2030	82	103	0.5	2.16736e-05	-0.213042	0.0478143	0.00413283
cg14976746	rs58061354:104230930:TTCGGTGCTGGG:T	2804	82	103	0.5	2.22182e-05	-0.213568	0.048001	0.00420902
cg14976746	rs11191295:104231054:A:G	2928	82	103	0.5	2.16736e-05	-0.213042	0.0478143	0.00413283
cg14976746	rs11356476:104231519:GA:G	3393	82	100	0.485437	6.36333e-06	-0.234303	0.0491794	0.00167349
cg14976746	rs7081110:104231651:A:G	3525	82	103	0.5	2.16736e-05	-0.213042	0.0478143	0.00413283
cg14976746	rs7081467:104231662:G:C	3536	82	103	0.5	2.16736e-05	-0.213042	0.0478143	0.00413283
cg14976746	rs3740415:104232716:G:A	4590	82	103	0.5	2.1587e-05	-0.213379	0.0478789	0.0041214
cg14976746	rs3740414:104232809:T:G	4683	82	103	0.5	2.16736e-05	-0.213042	0.0478143	0.00413283
cg14976746	rs11593971:104234090:C:G	5964	77	94	0.456311	9.26712e-05	-0.196904	0.0483515	0.0119575
cg14976746	rs111503247:104234781:G:GC	6655	53	62	0.300971	0.000567949	0.174615	0.0490551	0.0433664
cg14976746	rs10883725:104235956:G:C	7830	53	62	0.300971	0.000567949	0.174615	0.0490551	0.0433664
cg14976746	rs11595149:104235978:C:T	7852	78	95	0.461165	0.000109239	-0.196998	0.0489124	0.0134618
cg14976746	rs10883726:104236276:C:T	8150	53	62	0.300971	0.000567949	0.174615	0.0490551	0.0433664
cg14976746	rs1056739:104236542:T:C	8416	53	62	0.300971	0.000567949	0.174615	0.0490551	0.0433664
cg14976746	rs1056740:104236552:C:T	8426	53	62	0.300971	0.000567949	0.174615	0.0490551	0.0433664
cg14976746	rs1056741:104236640:A:C	8514	53	62	0.300971	0.000481018	0.17705	0.0490646	0.0387363
cg14976746	rs1056744	8561	77	94	0.456311	9.26712e-05	-0.196904	0.0483515	0.0119575
cg14976746	rs61873704:104236929:T:C	8803	53	62	0.300971	0.000567949	0.174615	0.0490551	0.0433664
cg14976746	rs12569526:104237007:A:G	8881	77	94	0.456311	9.26712e-05	-0.196904	0.0483515	0.0119575
cg19152246	rs11598884:104234588:A:G	3997	50	57	0.276699	0.000175892	-0.0791076	0.0203044	0.01898
cg19877809	rs11593971:104234090:C:G	-9680	77	94	0.456311	0.000571884	0.0812923	0.0228508	0.0435702
cg19877809	rs1056744	-7083	77	94	0.456311	0.000571884	0.0812923	0.0228508	0.0435702
cg19877809	rs12569526:104237007:A:G	-6763	77	94	0.456311	0.000571884	0.0812923	0.0228508	0.0435702
cg19877809	rs13287:104240438:A:G	-3332	57	70	0.339806	0.000379008	-0.0781682	0.0212532	0.0327571
cg19877809	rs12162:104240498:A:G	-3272	57	70	0.339806	0.000286188	-0.0798315	0.021239	0.0269114
cg19877809	rs2296578:104240974:C:G	-2796	57	70	0.339806	0.000379008	-0.0781682	0.0212532	0.0327571
cg19877809	rs2296579:104241375:A:G	-2395	57	70	0.339806	0.000379008	-0.0781682	0.0212532	0.0327571
cg19877809	rs2296583:104244322:T:G	552	57	70	0.339806	0.000379008	-0.0781682	0.0212532	0.0327571
cg19877809	rs2296584:104244323:T:A	553	57	70	0.339806	0.000379008	-0.0781682	0.0212532	0.0327571
cg19877809	rs3781290:104244948:G:C	1178	61	75	0.364078	0.00041155	-0.077805	0.0212928	0.0347608
cg19877809	rs3781289:104244991:G:T	1221	57	70	0.339806	0.000431058	-0.0776448	0.0213277	0.0359291
cg19877809	rs2296586:104245575:G:A	1805	57	70	0.339806	0.000379008	-0.0781682	0.0212532	0.0327571
cg19877809	rs7898410:104245858:T:C	2088	57	70	0.339806	0.000379008	-0.0781682	0.0212532	0.0327571
cg19877809	rs7917158:104246471:C:A	2701	57	70	0.339806	0.000379008	-0.0781682	0.0212532	0.0327571
cg19877809	rs7917402:104246690:C:T	2920	57	70	0.339806	0.000379008	-0.0781682	0.0212532	0.0327571
cg19877809	rs7917525:104246755:C:G	2985	57	70	0.339806	0.000379008	-0.0781682	0.0212532	0.0327571
cg19877809	rs12265877:104247247:C:G	3477	57	70	0.339806	0.000379008	-0.0781682	0.0212532	0.0327571
cg19877809	rs7358266:104247463:A:G	3693	57	70	0.339806	0.000379008	-0.0781682	0.0212532	0.0327571
cg19877809	rs11191299:104247481:C:T	3711	58	71	0.34466	0.000193203	-0.0820444	0.021201	0.0203142
cg19877809	rs11191300:104247485:T:C	3715	57	70	0.339806	0.000379008	-0.0781682	0.0212532	0.0327571
cg19877809	rs7358268:104247589:C:T	3819	57	70	0.339806	0.00037357	-0.0782789	0.0212591	0.0324418
cg19877809	rs2296588:104248087:T:C	4317	57	70	0.339806	0.000379008	-0.0781682	0.0212532	0.0327571
cg19877809	rs2296589:104248106:T:A	4336	57	70	0.339806	0.000379008	-0.0781682	0.0212532	0.0327571
cg19877809	rs11386205:104249623:T:TC	5853	57	70	0.339806	0.000379008	-0.0781682	0.0212532	0.0327571
cg19877809	rs7092622:104249919:T:G	6149	58	71	0.34466	0.000264841	-0.0806368	0.0213279	0.0254497
cg19877809	rs7074444:104249922:A:G	6152	58	71	0.34466	0.000264841	-0.0806368	0.0213279	0.0254497
cg19877809	rs111446950:104250209:CT:C	6439	57	70	0.339806	0.000379008	-0.0781682	0.0212532	0.0327571
cg19877809	rs61873733:104251458:G:A	7688	57	70	0.339806	0.000359607	-0.0785937	0.021281	0.0315933
cg19877809	rs6584504:104253507:T:C	9737	58	71	0.34466	0.000193203	-0.0820444	0.021201	0.0203142
cg09118835	rs7092622:104249919:T:G	5020	58	71	0.34466	0.000662627	0.142673	0.040604	0.0480351
cg09118835	rs7074444:104249922:A:G	5023	58	71	0.34466	0.000662627	0.142673	0.040604	0.0480351
ch.10.2196322F	rs11191296:104238558:G:C	-9505	22	23	0.11165	0.000254944	-0.311775	0.0822272	0.024762
ch.10.2196322F	rs4919647:104250754:A:C	2691	23	24	0.116505	0.00044519	-0.285783	0.0787031	0.0367285
cg17840164	rs6584504:104253507:T:C	-9064	58	71	0.34466	0.00036195	-0.112898	0.0305852	0.0317388
cg17840164	rs7069356:104254359:G:C	-8212	58	71	0.34466	0.00036195	-0.112898	0.0305852	0.0317388
cg17840164	rs6584506:104254428:T:C	-8143	58	71	0.34466	0.00036195	-0.112898	0.0305852	0.0317388
cg17840164	rs6584507:104254623:G:A	-7948	58	71	0.34466	0.00036195	-0.112898	0.0305852	0.0317388
cg17840164	rs7898507:104255106:C:G	-7465	58	71	0.34466	0.00036195	-0.112898	0.0305852	0.0317388
cg17840164	rs11191303:104255158:T:C	-7413	58	71	0.34466	0.00036195	-0.112898	0.0305852	0.0317388
cg17840164	rs11191304:104255284:C:T	-7287	58	71	0.34466	0.00036195	-0.112898	0.0305852	0.0317388
cg17840164	rs11191305:104255434:C:T	-7137	58	71	0.34466	0.00036195	-0.112898	0.0305852	0.0317388
cg17840164	rs7475806:104255813:C:T	-6758	58	71	0.34466	0.00036195	-0.112898	0.0305852	0.0317388
cg17840164	rs10786669:104256094:C:G	-6477	59	72	0.349515	0.000327319	-0.114282	0.0307189	0.0295495
cg17840164	rs715439:104257809:A:C	-4762	58	71	0.34466	0.00036195	-0.112898	0.0305852	0.0317388
cg17840164	rs6584508:104258567:A:G	-4004	58	71	0.34466	0.000358144	-0.112996	0.0305865	0.031499
cg17840164	rs7093028:104259417:A:G	-3154	58	71	0.34466	0.00036195	-0.112898	0.0305852	0.0317388
cg17840164	rs2296590	57	58	71	0.34466	0.00036195	-0.112898	0.0305852	0.0317388
cg17840164	rs3818470:104263675:T:C	1104	58	71	0.34466	0.00036195	-0.112898	0.0305852	0.0317388
cg17840164	rs3808934:104264280:C:T	1709	58	71	0.34466	0.00036195	-0.112898	0.0305852	0.0317388
cg17840164	10:104265795:T:TG	3224	58	71	0.34466	0.00036195	-0.112898	0.0305852	0.0317388
cg17840164	rs2281879:104268877:G:C	6306	58	71	0.34466	0.00036195	-0.112898	0.0305852	0.0317388
cg17840164	rs10883728:104269301:G:A	6730	58	71	0.34466	0.00036195	-0.112898	0.0305852	0.0317388
cg17840164	rs72188075:104270895:GTAA:G	8324	58	71	0.34466	0.00036195	-0.112898	0.0305852	0.0317388
cg17840164	rs10786671:104271303:G:A	8732	58	71	0.34466	0.00036195	-0.112898	0.0305852	0.0317388
cg07466585	rs7069356:104254359:G:C	-9322	58	71	0.34466	4.82472e-07	-0.257712	0.0478964	0.000255515
cg07466585	rs6584506:104254428:T:C	-9253	58	71	0.34466	4.82472e-07	-0.257712	0.0478964	0.000255515
cg07466585	rs6584507:104254623:G:A	-9058	58	71	0.34466	4.82472e-07	-0.257712	0.0478964	0.000255515
cg07466585	rs7898716:104255098:G:A	-8583	53	63	0.305825	2.42933e-06	-0.252803	0.0505701	0.00083267
cg07466585	rs7898507:104255106:C:G	-8575	58	71	0.34466	4.82472e-07	-0.257712	0.0478964	0.000255515
cg07466585	rs11191303:104255158:T:C	-8523	58	71	0.34466	4.82472e-07	-0.257712	0.0478964	0.000255515
cg07466585	rs11191304:104255284:C:T	-8397	58	71	0.34466	4.82472e-07	-0.257712	0.0478964	0.000255515
cg07466585	rs11191305:104255434:C:T	-8247	58	71	0.34466	4.82472e-07	-0.257712	0.0478964	0.000255515
cg07466585	rs7475806:104255813:C:T	-7868	58	71	0.34466	4.82472e-07	-0.257712	0.0478964	0.000255515
cg07466585	rs10786669:104256094:C:G	-7587	59	72	0.349515	3.87243e-07	-0.260978	0.0480495	0.000217383
cg07466585	rs12570859:104257226:C:T	-6455	81	102	0.495146	9.854e-05	0.216038	0.0532682	0.0124994
cg07466585	rs715439:104257809:A:C	-5872	58	71	0.34466	4.82472e-07	-0.257712	0.0478964	0.000255515
cg07466585	rs715440:104258095:A:T	-5586	81	102	0.495146	9.854e-05	0.216038	0.0532682	0.0124994
cg07466585	rs715438:104258303:C:T	-5378	53	63	0.305825	2.42933e-06	-0.252803	0.0505701	0.00083267
cg07466585	rs6584508:104258567:A:G	-5114	58	71	0.34466	4.79363e-07	-0.257804	0.0479003	0.0002543
cg07466585	rs7093028:104259417:A:G	-4264	58	71	0.34466	4.82472e-07	-0.257712	0.0478964	0.000255515
cg07466585	rs12766112:104260388:C:T	-3293	81	102	0.495146	9.854e-05	0.216038	0.0532682	0.0124994
cg07466585	rs2296590	-1053	58	71	0.34466	4.82472e-07	-0.257712	0.0478964	0.000255515
cg07466585	rs3818470:104263675:T:C	-6	58	71	0.34466	4.82472e-07	-0.257712	0.0478964	0.000255515
cg07466585	rs2274351	426	81	102	0.495146	9.854e-05	0.216038	0.0532682	0.0124994
cg07466585	rs3808934:104264280:C:T	599	58	71	0.34466	4.82472e-07	-0.257712	0.0478964	0.000255515
cg07466585	rs7072351:104265047:C:T	1366	53	63	0.305825	2.42933e-06	-0.252803	0.0505701	0.00083267
cg07466585	10:104265795:T:TG	2114	58	71	0.34466	4.82472e-07	-0.257712	0.0478964	0.000255515
cg07466585	rs7902317:104266230:G:C	2549	81	102	0.495146	9.854e-05	0.216038	0.0532682	0.0124994
cg07466585	rs2281879:104268877:G:C	5196	58	71	0.34466	4.82472e-07	-0.257712	0.0478964	0.000255515
cg07466585	rs2281880:104269217:G:A	5536	81	102	0.495146	9.854e-05	0.216038	0.0532682	0.0124994
cg07466585	rs10883728:104269301:G:A	5620	58	71	0.34466	4.82472e-07	-0.257712	0.0478964	0.000255515
cg07466585	rs72188075:104270895:GTAA:G	7214	58	71	0.34466	4.82472e-07	-0.257712	0.0478964	0.000255515
cg07466585	rs10786671:104271303:G:A	7622	58	71	0.34466	4.82472e-07	-0.257712	0.0478964	0.000255515
cg07466585	rs1326193:104271674:G:T	7993	53	63	0.305825	2.42933e-06	-0.252803	0.0505701	0.00083267
cg07466585	rs3740406:104272789:C:T	9108	58	71	0.34466	4.82472e-07	-0.257712	0.0478964	0.000255515
cg11453585	rs7069356:104254359:G:C	-9330	58	71	0.34466	8.55532e-07	0.183361	0.0349455	0.000390345
cg11453585	rs6584506:104254428:T:C	-9261	58	71	0.34466	8.55532e-07	0.183361	0.0349455	0.000390345
cg11453585	rs6584507:104254623:G:A	-9066	58	71	0.34466	8.55532e-07	0.183361	0.0349455	0.000390345
cg11453585	rs7898716:104255098:G:A	-8591	53	63	0.305825	7.13439e-08	0.206282	0.0354727	6.26535e-05
cg11453585	rs7898507:104255106:C:G	-8583	58	71	0.34466	8.55532e-07	0.183361	0.0349455	0.000390345
cg11453585	rs11191303:104255158:T:C	-8531	58	71	0.34466	8.55532e-07	0.183361	0.0349455	0.000390345
cg11453585	rs11191304:104255284:C:T	-8405	58	71	0.34466	8.55532e-07	0.183361	0.0349455	0.000390345
cg11453585	rs11191305:104255434:C:T	-8255	58	71	0.34466	8.55532e-07	0.183361	0.0349455	0.000390345
cg11453585	rs7475806:104255813:C:T	-7876	58	71	0.34466	8.55532e-07	0.183361	0.0349455	0.000390345
cg11453585	rs10786669:104256094:C:G	-7595	59	72	0.349515	1.6518e-07	0.194562	0.0345809	0.000116552
cg11453585	rs715439:104257809:A:C	-5880	58	71	0.34466	8.55532e-07	0.183361	0.0349455	0.000390345
cg11453585	rs715438:104258303:C:T	-5386	53	63	0.305825	7.13439e-08	0.206282	0.0354727	6.26535e-05
cg11453585	rs6584508:104258567:A:G	-5122	58	71	0.34466	8.54225e-07	0.183397	0.03495	0.000390038
cg11453585	rs7093028:104259417:A:G	-4272	58	71	0.34466	8.55532e-07	0.183361	0.0349455	0.000390345
cg11453585	rs2296590	-1061	58	71	0.34466	8.55532e-07	0.183361	0.0349455	0.000390345
cg11453585	rs3818470:104263675:T:C	-14	58	71	0.34466	8.55532e-07	0.183361	0.0349455	0.000390345
cg11453585	rs3808934:104264280:C:T	591	58	71	0.34466	8.55532e-07	0.183361	0.0349455	0.000390345
cg11453585	rs7072351:104265047:C:T	1358	53	63	0.305825	7.13439e-08	0.206282	0.0354727	6.26535e-05
cg11453585	10:104265795:T:TG	2106	58	71	0.34466	8.55532e-07	0.183361	0.0349455	0.000390345
cg11453585	rs2281879:104268877:G:C	5188	58	71	0.34466	8.55532e-07	0.183361	0.0349455	0.000390345
cg11453585	rs10883728:104269301:G:A	5612	58	71	0.34466	8.55532e-07	0.183361	0.0349455	0.000390345
cg11453585	rs72188075:104270895:GTAA:G	7206	58	71	0.34466	8.55532e-07	0.183361	0.0349455	0.000390345
cg11453585	rs10786671:104271303:G:A	7614	58	71	0.34466	8.55532e-07	0.183361	0.0349455	0.000390345
cg11453585	rs1326193:104271674:G:T	7985	53	63	0.305825	7.13439e-08	0.206282	0.0354727	6.26535e-05
cg11453585	rs3740406:104272789:C:T	9100	58	71	0.34466	8.55532e-07	0.183361	0.0349455	0.000390345
cg26332985	10:104278272:G:GTCTATCTA	-3947	81	102	0.495146	0.000628825	-0.0818892	0.0232023	0.0463901
cg26332985	rs12768479:104278276:G:A	-3943	81	102	0.495146	0.000628825	-0.0818892	0.0232023	0.0463901
cg26332985	rs11191312:104278601:T:C	-3618	46	53	0.257282	0.000313295	0.0895848	0.0239992	0.0286645
cg26332985	rs11191313:104278618:C:T	-3601	46	53	0.257282	0.000313295	0.0895848	0.0239992	0.0286645
cg26332985	rs11592334:104278693:G:A	-3526	81	102	0.495146	0.000630962	-0.081851	0.0231981	0.0464884
cg26332985	rs7078511:104283874:C:A	1655	81	102	0.495146	0.000630962	-0.081851	0.0231981	0.0464884
cg26332985	rs7078679:104284017:C:G	1798	81	102	0.495146	0.000630962	-0.081851	0.0231981	0.0464884
cg26332985	rs1967814:104287048:C:T	4829	42	47	0.228155	0.000114227	0.100616	0.0250578	0.0139056
cg26332985	rs1967815:104287051:G:A	4832	42	47	0.228155	0.000114227	0.100616	0.0250578	0.0139056
cg14640555	rs10444069:104346166:T:C	-9092	75	92	0.446602	0.00017704	-0.107684	0.0276518	0.01907
cg14640555	rs10883744:104347247:A:G	-8011	75	92	0.446602	0.00017704	-0.107684	0.0276518	0.01907
cg14640555	rs71474568:104348848:T:TTG	-6410	56	65	0.315534	4.63928e-05	0.118205	0.027764	0.00723098
cg14640555	rs7072723:104349483:G:A	-5775	75	92	0.446602	0.00017704	-0.107684	0.0276518	0.01907
cg14640555	rs12411442:104349531:A:G	-5727	75	92	0.446602	0.00017704	-0.107684	0.0276518	0.01907
cg14640555	rs7898166:104349962:A:G	-5296	75	92	0.446602	0.000176012	-0.10775	0.0276573	0.0189893
cg14640555	rs3839934:104352124:C:CCATTT	-3134	75	92	0.446602	0.00017704	-0.107684	0.0276518	0.01907
cg14640555	rs3936017:104354424:T:C	-834	75	92	0.446602	0.000176158	-0.107729	0.0276536	0.0190009
cg14640555	rs10748826:104354804:T:C	-454	75	92	0.446602	0.000176158	-0.107729	0.0276536	0.0190009
cg14640555	rs3934960:104355275:A:G	17	76	93	0.451456	0.000127128	0.110925	0.0278286	0.0150502
cg14640555	rs10786689:104356359:T:C	1101	75	92	0.446602	0.000176158	-0.107729	0.0276536	0.0190009
cg14640555	rs4919661:104358403:T:C	3145	75	92	0.446602	0.000176158	-0.107729	0.0276536	0.0190009
cg14640555	rs4917975:104358407:C:G	3149	75	92	0.446602	0.000176158	-0.107729	0.0276536	0.0190009
cg14640555	rs12779854:104358474:G:A	3216	76	93	0.451456	0.00012634	0.110968	0.0278276	0.0149764
cg14640555	rs12762934:104359884:C:T	4626	49	57	0.276699	0.000158969	0.111246	0.0283484	0.0176527
cg14640555	rs4917976:104360518:C:T	5260	75	92	0.446602	0.000178646	-0.107637	0.0276579	0.0191958
cg14640555	rs4917977:104363119:C:T	7861	75	92	0.446602	0.000175396	-0.107786	0.0276595	0.0189412
cg14640555	rs4919663:104363293:T:C	8035	75	92	0.446602	0.000175396	-0.107786	0.0276595	0.0189412
cg14640555	rs4919664:104363408:A:C	8150	75	92	0.446602	0.000175396	-0.107786	0.0276595	0.0189412
cg14640555	rs10786691:104364652:G:A	9394	75	92	0.446602	0.000176158	-0.107729	0.0276536	0.0190009
cg26457868	rs10786689:104356359:T:C	-9328	75	92	0.446602	6.97359e-08	-0.337758	0.0580308	6.15853e-05
cg26457868	rs4919661:104358403:T:C	-7284	75	92	0.446602	6.97359e-08	-0.337758	0.0580308	6.15853e-05
cg26457868	rs4917975:104358407:C:G	-7280	75	92	0.446602	6.97359e-08	-0.337758	0.0580308	6.15853e-05
cg26457868	rs12779854:104358474:G:A	-7213	76	93	0.451456	6.10615e-08	0.342239	0.058503	5.62146e-05
cg26457868	rs12762934:104359884:C:T	-5803	49	57	0.276699	0.000551921	0.231371	0.0648456	0.0425245
cg26457868	rs4917976:104360518:C:T	-5169	75	92	0.446602	6.95286e-08	-0.337794	0.0580305	6.14899e-05
cg26457868	rs4917977:104363119:C:T	-2568	75	92	0.446602	6.93058e-08	-0.337903	0.0580421	6.13256e-05
cg26457868	rs4919663:104363293:T:C	-2394	75	92	0.446602	6.93058e-08	-0.337903	0.0580421	6.13256e-05
cg26457868	rs4919664:104363408:A:C	-2279	75	92	0.446602	6.93058e-08	-0.337903	0.0580421	6.13256e-05
cg26457868	rs10786691:104364652:G:A	-1035	75	92	0.446602	6.97359e-08	-0.337758	0.0580308	6.15853e-05
cg26457868	rs36008569:104365489:TG:T	-198	76	93	0.451456	6.09661e-08	0.342247	0.0585009	5.61411e-05
cg26457868	rs7075269:104365724:G:A	37	75	92	0.446602	6.97359e-08	-0.337758	0.0580308	6.15853e-05
cg26457868	rs4919665:104366042:T:C	355	75	92	0.446602	7.00727e-08	-0.337683	0.0580288	6.18064e-05
cg26457868	rs4917978:104366353:T:C	666	75	92	0.446602	6.97359e-08	-0.337758	0.0580308	6.15853e-05
cg26457868	rs7904955:104367092:C:T	1405	50	59	0.286408	2.59541e-06	-0.299378	0.0600784	0.000872254
cg26457868	rs12782153:104368294:A:G	2607	76	93	0.451456	6.09661e-08	0.342247	0.0585009	5.61411e-05
cg26457868	rs10748827:104368336:G:T	2649	53	63	0.305825	2.34658e-05	-0.268374	0.0605104	0.00437989
cg26457868	rs10786695:104368756:A:C	3069	75	92	0.446602	6.97359e-08	-0.337758	0.0580308	6.15853e-05
cg26457868	rs11394237:104369039:T:TA	3352	75	92	0.446602	6.97359e-08	-0.337758	0.0580308	6.15853e-05
cg26457868	rs10736158:104370023:A:G	4336	76	93	0.451456	5.90691e-08	-0.340267	0.0580925	5.47825e-05
cg26457868	rs7907417:104370662:T:C	4975	75	92	0.446602	6.97131e-08	0.337753	0.0580293	6.15853e-05
cg26457868	rs11191352:104372244:A:G	6557	75	92	0.446602	6.66449e-08	-0.338122	0.0579926	5.96019e-05
cg26457868	rs10883753:104372441:C:T	6754	75	92	0.446602	6.97359e-08	-0.337758	0.0580308	6.15853e-05
cg26457868	rs7908249:104373300:A:G	7613	75	92	0.446602	6.97359e-08	-0.337758	0.0580308	6.15853e-05
cg26457868	rs7912339:104373758:G:C	8071	75	92	0.446602	6.8662e-08	-0.338017	0.0580408	6.09183e-05
cg26457868	rs4604806:104373904:G:A	8217	75	92	0.446602	6.8662e-08	-0.338017	0.0580408	6.09183e-05
cg26457868	rs4408249:104374653:T:A	8966	74	92	0.446602	5.31319e-08	-0.334405	0.056863	5.09183e-05
cg26457868	rs7093285:104374815:G:C	9128	49	58	0.281553	2.93218e-06	-0.297568	0.0600703	0.000951985
cg26457868	rs2001389:104375258:G:A	9571	74	91	0.441748	1.01429e-07	-0.331424	0.0577758	8.04551e-05
cg16102363	rs7904955:104367092:C:T	-8910	50	59	0.286408	0.000266159	0.0966327	0.0255683	0.0255378
cg16102363	rs12782153:104368294:A:G	-7708	76	93	0.451456	0.000641935	-0.0916797	0.0260216	0.0470328
cg16102363	rs7093285:104374815:G:C	-1187	49	58	0.281553	0.00045226	0.0930622	0.0256614	0.0371318
cg16102363	rs45516493:104378363:G:A	2361	23	24	0.116505	0.000158986	0.150405	0.0383275	0.0176538
cg16102363	rs11191353:104382673:A:G	6671	71	83	0.402913	0.000376868	0.0981246	0.0266673	0.0326385
cg10872209	rs7076749:104469728:T:A	-5581	53	61	0.296117	0.00011757	-0.234802	0.0585913	0.0142001
cg10872209	rs11191377:104472777:T:C	-2532	53	61	0.296117	0.000127839	-0.233258	0.0585417	0.0151059
cg10872209	rs10786704:104475010:G:T	-299	53	61	0.296117	0.000126609	-0.233347	0.058525	0.0150012
cg10872209	rs10565525:104476319:CTTTTT:C	1010	55	63	0.305825	7.18231e-05	-0.243366	0.058768	0.00996279
cg10872209	rs10786705	2396	53	61	0.296117	0.000125575	-0.233404	0.0585063	0.0149062
cg10872209	rs2902547:104482331:G:A	7022	53	61	0.296117	0.000126291	-0.233359	0.0585179	0.0149716
cg04774043	rs149894803:104499251:A:AGAGTTGTAAAAGGGAACAACAG	820	73	93	0.451456	0.000618922	0.12027	0.0340316	0.0459001
cg13349042	rs60459635:104500988:T:G	-2114	40	44	0.213592	0.000384788	-0.196942	0.0536105	0.0331138
cg13349042	rs2297450:104503174:T:C	72	40	44	0.213592	0.000384788	-0.196942	0.0536105	0.0331138
cg13349042	10:104504564	1462	21	22	0.106796	0.00056502	-0.250987	0.0704801	0.0432161
cg05855489	rs61869252:104496658:C:T	-6963	48	53	0.257282	1.42104e-05	0.287592	0.0630233	0.00303322
cg05855489	rs12762176:104499232:A:T	-4389	43	49	0.237864	0.000594666	0.226233	0.0638003	0.044722
cg05855489	rs149894803:104499251:A:AGAGTTGTAAAAGGGAACAACAG	-4370	73	93	0.451456	7.11764e-08	0.297577	0.0511674	6.25446e-05
cg05855489	rs10786706	-2962	75	98	0.475728	1.92713e-09	0.320249	0.0485198	4.79356e-06
cg05855489	rs3818708:104503584:C:T	-37	75	97	0.470874	5.70953e-10	0.332437	0.0484822	2.05276e-06
cg05855489	rs66527766:104506366:TG:T	2745	47	52	0.252427	1.93607e-05	0.283747	0.0632723	0.00379779
cg05855489	rs12763284:104508202:A:G	4581	75	97	0.470874	7.40232e-08	0.294831	0.0507718	6.4277e-05
cg05855489	rs67506723:104509064:G:T	5443	75	95	0.461165	2.94115e-09	0.328296	0.0504262	6.52527e-06
cg05855489	rs58706228:104509818:C:T	6197	49	54	0.262136	0.000240542	0.246941	0.064846	0.0237669
cg05855489	rs2250064:104510305:C:T	6684	50	55	0.26699	0.000209786	0.249335	0.0648176	0.0215526
cg05855489	rs2250052:104510505:G:A	6884	49	54	0.262136	0.000240542	0.246941	0.064846	0.0237669
cg12711443	rs144246523:104498328:AC:A	-5533	16	16	0.0776699	0.000377025	-0.172996	0.0470166	0.0326437
cg12711443	rs189977457:104498331:G:T	-5530	16	16	0.0776699	0.000369053	-0.173233	0.0470021	0.0321691
cg16522697	rs11191387:104515440:G:A	-8697	53	63	0.305825	8.91528e-05	0.156008	0.0382105	0.0116267
cg16522697	rs2482501:104515725:C:A	-8412	48	54	0.262136	9.4789e-06	-0.189602	0.0406419	0.00224356
cg16522697	rs4919670:104515799:C:A	-8338	53	63	0.305825	8.84338e-05	0.156148	0.0382244	0.011557
cg16522697	rs7068910:104515850:T:C	-8287	53	63	0.305825	8.84338e-05	0.156148	0.0382244	0.011557
cg16522697	rs2482499:104516246:G:A	-7891	48	54	0.262136	9.52321e-06	-0.189566	0.0406444	0.00225152
cg16522697	rs34072846:104517775:T:TG	-6362	53	63	0.305825	8.80584e-05	0.156256	0.0382401	0.0115225
cg16522697	rs2863718:104519631:G:C	-4506	48	54	0.262136	9.568e-06	0.189553	0.0406519	0.00225977
cg16522697	rs2863717:104519829:A:G	-4308	48	54	0.262136	9.57848e-06	0.18959	0.0406622	0.00226159
cg16522697	rs7070903:104520197:G:C	-3940	48	54	0.262136	9.65991e-06	0.18957	0.0406763	0.00227779
cg16522697	rs7088981:104520423:T:C	-3714	48	54	0.262136	9.59997e-06	0.18967	0.0406842	0.00226585
cg16522697	rs4919671:104521022:A:G	-3115	48	54	0.262136	9.70279e-06	0.189624	0.0406975	0.00228539
cg16522697	rs4919672:104521104:T:C	-3033	48	54	0.262136	9.71607e-06	0.189632	0.0407024	0.00228785
cg16522697	rs4919673:104521319:G:A	-2818	48	54	0.262136	9.75725e-06	0.189596	0.0407038	0.00229596
cg16522697	rs4919674:104522226:T:C	-1911	48	54	0.262136	9.83061e-06	0.18963	0.0407275	0.00230894
cg16522697	rs1475646:104522564:G:T	-1573	48	54	0.262136	9.83061e-06	0.18963	0.0407275	0.00230894
cg16522697	rs10883773:104522885:T:C	-1252	48	54	0.262136	9.83061e-06	0.18963	0.0407275	0.00230894
cg16522697	rs4919676:104524352:C:T	215	48	54	0.262136	9.83061e-06	0.18963	0.0407275	0.00230894
cg16522697	rs7894154:104524647:G:A	510	48	54	0.262136	9.83061e-06	0.18963	0.0407275	0.00230894
cg16522697	rs4418737:104525123:A:G	986	48	54	0.262136	9.83061e-06	0.18963	0.0407275	0.00230894
cg16522697	rs7069489:104525371:C:T	1234	48	54	0.262136	9.83061e-06	0.18963	0.0407275	0.00230894
cg16522697	rs10786707:104526155:A:G	2018	48	54	0.262136	9.83061e-06	0.18963	0.0407275	0.00230894
cg16522697	rs10786708:104526245:A:G	2108	48	54	0.262136	9.83061e-06	0.18963	0.0407275	0.00230894
cg16522697	rs10748829:104527244:G:A	3107	48	54	0.262136	9.83061e-06	0.18963	0.0407275	0.00230894
cg16522697	rs7079231:104527341:G:A	3204	48	54	0.262136	9.5677e-06	0.189843	0.040714	0.00225976
cg16522697	rs7911747:104528890:A:G	4753	48	54	0.262136	9.83061e-06	0.18963	0.0407275	0.00230894
cg16522697	rs7897384:104529042:T:G	4905	48	54	0.262136	9.83061e-06	0.18963	0.0407275	0.00230894
cg27079583	rs34072846:104517775:T:TG	-8901	53	63	0.305825	0.000296343	0.174018	0.0464202	0.0275659
cg27079583	rs2863718:104519631:G:C	-7045	48	54	0.262136	0.000160275	0.196514	0.050106	0.0177612
cg27079583	rs2863717:104519829:A:G	-6847	48	54	0.262136	0.000164469	0.19625	0.0501303	0.0180938
cg27079583	rs7070903:104520197:G:C	-6479	48	54	0.262136	0.000168437	0.196013	0.0501548	0.0183906
cg27079583	rs7088981:104520423:T:C	-6253	48	54	0.262136	0.000170102	0.195943	0.0501722	0.018518
cg27079583	rs4919671:104521022:A:G	-5654	48	54	0.262136	0.000176892	0.195511	0.0502019	0.0190587
cg27079583	rs4919672:104521104:T:C	-5572	48	54	0.262136	0.000177547	0.195487	0.0502089	0.0191129
cg27079583	rs4919673:104521319:G:A	-5357	48	54	0.262136	0.000180416	0.195291	0.0502163	0.0193293
cg27079583	rs4919674:104522226:T:C	-4450	48	54	0.262136	0.000190362	0.194734	0.0502672	0.0201014
cg27079583	rs1475646:104522564:G:T	-4112	48	54	0.262136	0.000190362	0.194734	0.0502672	0.0201014
cg27079583	rs10883773:104522885:T:C	-3791	48	54	0.262136	0.000190362	0.194734	0.0502672	0.0201014
cg27079583	rs4919676:104524352:C:T	-2324	48	54	0.262136	0.000190362	0.194734	0.0502672	0.0201014
cg27079583	rs7894154:104524647:G:A	-2029	48	54	0.262136	0.000190362	0.194734	0.0502672	0.0201014
cg27079583	rs4418737:104525123:A:G	-1553	48	54	0.262136	0.000190362	0.194734	0.0502672	0.0201014
cg27079583	rs7069489:104525371:C:T	-1305	48	54	0.262136	0.000190362	0.194734	0.0502672	0.0201014
cg27079583	rs10786707:104526155:A:G	-521	48	54	0.262136	0.000190362	0.194734	0.0502672	0.0201014
cg27079583	rs10786708:104526245:A:G	-431	48	54	0.262136	0.000190362	0.194734	0.0502672	0.0201014
cg27079583	rs10748829:104527244:G:A	568	48	54	0.262136	0.000190362	0.194734	0.0502672	0.0201014
cg27079583	rs7079231:104527341:G:A	665	48	54	0.262136	0.000183313	0.195181	0.0502456	0.0195552
cg27079583	rs7911747:104528890:A:G	2214	48	54	0.262136	0.000190362	0.194734	0.0502672	0.0201014
cg27079583	rs7897384:104529042:T:G	2366	48	54	0.262136	0.000190362	0.194734	0.0502672	0.0201014
cg27079583	rs2486757:104535145:C:T	8469	48	54	0.262136	0.000220507	-0.193294	0.050433	0.0223486
cg10048578	rs12775376:104523634:G:A	-9541	39	45	0.218447	5.52323e-07	-0.339201	0.0634112	0.000281677
cg10048578	rs11191394:104528509:A:C	-4666	39	45	0.218447	5.49433e-07	-0.339301	0.0634155	0.000280561
cg10048578	rs71019613:104531316:G:GT	-1859	39	45	0.218447	5.47621e-07	-0.339551	0.063453	0.000279835
cg10048578	rs10883775:104532004:T:C	-1171	78	102	0.495146	1.0376e-07	0.312002	0.0544385	8.18503e-05
cg10048578	rs12776506:104532828:A:G	-347	41	48	0.23301	8.9314e-08	-0.34897	0.0605331	7.33095e-05
cg10048578	rs593410:104532832:T:C	-343	78	102	0.495146	6.53515e-08	0.314475	0.0538963	5.88355e-05
cg10048578	rs549466	-262	78	102	0.495146	6.58527e-08	0.313745	0.0537869	5.90944e-05
cg10048578	rs553258:104533322:C:T	147	78	102	0.495146	6.53515e-08	0.314475	0.0538963	5.88355e-05
cg10048578	rs499770:104534907:C:G	1732	78	102	0.495146	6.59278e-08	-0.314573	0.0539312	5.91298e-05
cg10048578	rs2482498:104535450:G:C	2275	77	102	0.495146	1.54645e-08	-0.3207	0.0521246	2.07286e-05
cg10048578	rs2254563:104536365:C:G	3190	77	102	0.495146	1.54645e-08	-0.3207	0.0521246	2.07286e-05
cg10048578	rs630185:104537149:A:G	3974	77	102	0.495146	1.63196e-08	-0.32022	0.052146	2.14117e-05
cg10048578	rs2482496:104537943:C:G	4768	77	102	0.495146	1.54645e-08	-0.3207	0.0521246	2.07286e-05
cg10048578	rs2486756:104538581:T:C	5406	77	102	0.495146	1.54645e-08	-0.3207	0.0521246	2.07286e-05
cg10048578	rs541393:104538611:T:C	5436	77	102	0.495146	1.54645e-08	-0.3207	0.0521246	2.07286e-05
cg10048578	rs61870778:104539028:A:G	5853	77	102	0.495146	1.54645e-08	-0.3207	0.0521246	2.07286e-05
cg10048578	rs80151121:104539458:C:CT	6283	78	103	0.5	8.05629e-08	-0.309555	0.0534817	6.81869e-05
cg10048578	rs2254111:104539520:A:T	6345	78	103	0.5	8.05629e-08	-0.309555	0.0534817	6.81869e-05
cg10048578	rs2254093:104539917:T:G	6742	78	102	0.495146	6.58387e-08	-0.314758	0.0539602	5.90867e-05
cg10048578	rs2253983:104540461:C:T	7286	78	102	0.495146	6.58387e-08	-0.314758	0.0539602	5.90867e-05
cg10048578	rs674816:104540565:G:C	7390	77	102	0.495146	1.5349e-08	-0.320826	0.0521313	2.06199e-05
cg10048578	rs524430:104541500:C:A	8325	77	102	0.495146	1.54645e-08	-0.3207	0.0521246	2.07286e-05
cg10048578	rs525458:104541627:G:T	8452	77	102	0.495146	1.51769e-08	-0.321862	0.0522787	2.04908e-05
cg10048578	rs2253703:104542974:C:T	9799	78	103	0.5	9.20148e-08	-0.310998	0.054009	7.46401e-05
cg10555609	rs11191394:104528509:A:C	-6698	39	45	0.218447	5.73433e-07	0.226914	0.0424892	0.000289345
cg10555609	rs71019613:104531316:G:GT	-3891	39	45	0.218447	5.88664e-07	0.226854	0.0425264	0.000295213
cg10555609	rs12776506:104532828:A:G	-2379	41	48	0.23301	2.21417e-07	0.227373	0.0408971	0.000144125
cg00037952	rs11191394:104528509:A:C	-6768	39	45	0.218447	9.42688e-05	0.171026	0.0420447	0.0121098
cg00037952	rs71019613:104531316:G:GT	-3961	39	45	0.218447	9.64478e-05	0.170908	0.04208	0.012307
cg00037952	rs12776506:104532828:A:G	-2449	41	48	0.23301	3.39487e-05	0.175528	0.0404495	0.00576032
cg00037952	rs2253950:104541120:G:A	5843	47	53	0.257282	0.000171935	-0.164529	0.0421607	0.0186669
cg17740322	rs12776506:104532828:A:G	-2694	41	48	0.23301	0.000506724	0.143202	0.0398534	0.0401255
cg24541187	rs11191401:104573403:A:G	-5578	40	46	0.223301	7.25813e-07	-0.169847	0.0321341	0.000346455
cg24541187	rs3216007:104575412:C:CTT	-3569	40	46	0.223301	7.08693e-07	-0.173089	0.0327129	0.000340006
cg24541187	rs10883780:104579328:C:T	347	39	45	0.218447	7.74837e-07	-0.174595	0.0331283	0.000363256
cg24541187	rs12780720:104580643:A:G	1662	39	44	0.213592	8.20732e-07	-0.17501	0.0332922	0.000378697
cg24541187	rs10883781:104581130:A:G	2149	39	44	0.213592	8.41209e-07	-0.175113	0.0333485	0.000385547
cg24541187	rs4919682	5349	37	41	0.199029	2.85639e-06	-0.172016	0.0346806	0.000934524
cg24541187	rs7902804:104585405:A:T	6424	55	65	0.315534	0.000213526	-0.119109	0.0310039	0.0218314
cg24541187	rs35756290:104585572:G:A	6591	31	33	0.160194	1.75683e-05	-0.175566	0.0389336	0.00353565
cg24541187	rs4919684:104587024:A:G	8043	36	39	0.18932	2.30939e-06	-0.178797	0.0356792	0.000802838
cg24541187	rs4919685:104587362:G:T	8381	36	39	0.18932	2.34372e-06	-0.17877	0.035699	0.000812063
cg08330031	rs4919690	-7004	32	34	0.165049	8.81481e-07	0.2519	0.0480722	0.000398969
cg08330031	rs7096249:104618524:G:A	-4980	62	72	0.349515	0.000616901	0.144915	0.0409938	0.0457951
cg08330031	rs7096169:104618695:A:G	-4809	54	64	0.31068	0.000121922	0.156666	0.039191	0.0145811
cg08330031	rs11441374:104619292:A:AC	-4212	32	34	0.165049	8.81481e-07	0.2519	0.0480722	0.000398969
cg08330031	rs7100530:104619448:A:G	-4056	62	72	0.349515	0.000616901	0.144915	0.0409938	0.0457951
cg08330031	rs10786715:104620735:G:C	-2769	62	72	0.349515	0.000673139	0.144371	0.0411423	0.0485776
cg08330031	rs12241517:104621068:A:G	-2436	54	64	0.31068	0.000120501	0.156761	0.0391832	0.0144572
cg08330031	rs11191421:104623053:C:G	-451	32	34	0.165049	8.81481e-07	0.2519	0.0480722	0.000398969
cg08330031	rs9527:104623578:C:T	74	32	34	0.165049	8.81481e-07	0.2519	0.0480722	0.000398969
cg08330031	rs4917985:104624072:G:A	568	62	72	0.349515	0.000610144	0.145024	0.0409865	0.045481
cg08330031	rs4919691:104624475:T:G	971	62	72	0.349515	0.000610144	0.145024	0.0409865	0.045481
cg08330031	rs10786716:104625178:T:C	1674	62	72	0.349515	0.000610144	0.145024	0.0409865	0.045481
cg08330031	rs10786717:104625237:A:G	1733	54	64	0.31068	0.000120501	0.156761	0.0391832	0.0144572
cg08330031	rs11191424:104625886:G:A	2382	54	64	0.31068	0.000120501	0.156761	0.0391832	0.0144572
cg08330031	rs7085104	5369	54	63	0.305825	0.000140496	0.158555	0.0400547	0.0161534
cg08330031	rs12416687:104629011:T:C	5507	32	34	0.165049	8.44485e-07	0.253606	0.0483051	0.000386687
cg08330031	rs17881215:104629236:G:C	5732	27	29	0.140777	1.32149e-05	0.235161	0.0513266	0.00287386
cg08330031	rs3740400:104629465:T:G	5961	62	72	0.349515	0.000608337	0.145105	0.0409994	0.0454037
cg08330031	rs3832685:104629793:G:GCTC	6289	62	72	0.349515	0.000604895	0.14519	0.0410038	0.0452371
cg08330031	rs4917986:104630181:T:C	6677	25	25	0.121359	3.06774e-06	0.28686	0.0580368	0.000983443
cg08330031	rs7904113:104633114:G:T	9610	62	72	0.349515	0.0006189	0.145171	0.0410774	0.0458996
cg05873389	rs7085104	61	54	63	0.305825	0.00070067	0.197473	0.0564681	0.0499274
cg18534077	rs7100530:104619448:A:G	-9399	62	72	0.349515	6.53755e-07	0.21942	0.0413221	0.000319795
cg18534077	rs10786715:104620735:G:C	-8112	62	72	0.349515	9.536e-07	0.217157	0.0415886	0.00042334
cg18534077	rs12241517:104621068:A:G	-7779	54	64	0.31068	2.8928e-06	0.201636	0.0406776	0.00094333
cg18534077	rs4917985:104624072:G:A	-4775	62	72	0.349515	6.49578e-07	0.219451	0.0413165	0.000318448
cg18534077	rs4919691:104624475:T:G	-4372	62	72	0.349515	6.49578e-07	0.219451	0.0413165	0.000318448
cg18534077	rs10786716:104625178:T:C	-3669	62	72	0.349515	6.49578e-07	0.219451	0.0413165	0.000318448
cg18534077	rs10786717:104625237:A:G	-3610	54	64	0.31068	2.8928e-06	0.201636	0.0406776	0.00094333
cg18534077	rs11191424:104625886:G:A	-2961	54	64	0.31068	2.8928e-06	0.201636	0.0406776	0.00094333
cg18534077	rs11191425:104625970:C:T	-2877	24	25	0.121359	0.000510644	0.222998	0.0621001	0.0403404
cg18534077	rs11191426:104627230:G:T	-1617	23	24	0.116505	0.000586358	0.223563	0.0629733	0.0443214
cg18534077	rs7098825:104628234:T:C	-613	24	25	0.121359	0.000510644	0.222998	0.0621001	0.0403404
cg18534077	rs7085104	26	54	63	0.305825	4.17942e-06	0.202823	0.0416686	0.00122721
cg18534077	rs3740400:104629465:T:G	618	62	72	0.349515	6.34217e-07	0.219706	0.0413211	0.000312835
cg18534077	rs3832685:104629793:G:GCTC	946	62	72	0.349515	6.21211e-07	0.219898	0.0413195	0.000307856
cg18534077	rs17878846:104630412:A:T	1565	23	24	0.116505	0.000586358	0.223563	0.0629733	0.0443214
cg18534077	rs10786718:104631189:G:A	2342	35	40	0.194175	0.000207299	0.185065	0.0480679	0.0213732
cg18534077	rs139792328:104631484:CAAACAAAACA:C	2637	35	39	0.18932	0.000259562	0.188618	0.049813	0.0250845
cg18534077	rs12767543:104631663:G:A	2816	35	40	0.194175	0.00020465	0.18524	0.0480684	0.0211761
cg18534077	rs7904113:104633114:G:T	4267	62	72	0.349515	5.53035e-07	0.221118	0.0413388	0.000281854
cg18534077	rs7920657:104633244:T:A	4397	35	40	0.194175	0.000194924	0.185818	0.0480479	0.0204437
cg18534077	rs7920697:104633337:T:C	4490	35	40	0.194175	0.000194281	0.185815	0.0480357	0.0203936
cg18534077	rs12764049:104634956:A:G	6109	35	40	0.194175	0.000185504	0.186269	0.0479925	0.0197347
cg18534077	rs12765337:104635344:G:C	6497	62	72	0.349515	5.06729e-07	0.221876	0.0413235	0.000264523
cg18534077	rs12765002:104635348:C:T	6501	35	39	0.18932	0.000242736	0.189218	0.0497217	0.0239218
cg18534077	rs12770034:104635595:A:G	6748	62	72	0.349515	5.02298e-07	0.221951	0.0413218	0.000262844
cg18534077	rs12771681:104635620:T:C	6773	35	40	0.194175	0.00018572	0.186209	0.047981	0.0197511
cg18534077	rs77335224:104636276:C:T	7429	24	25	0.121359	0.000190726	0.241427	0.0623285	0.0201292
cg18534077	rs11191434:104637508:T:C	8661	26	28	0.135922	0.000118186	0.230036	0.0574225	0.0142548
cg18534077	rs11191438:104637864:G:C	9017	72	87	0.42233	5.93092e-06	0.198098	0.0414289	0.00158718
cg18534077	rs10786719:104637992:A:G	9145	72	87	0.42233	5.93469e-06	0.198102	0.0414311	0.00158795
cg18534077	rs3740390:104638480:C:T	9633	24	25	0.121359	0.000298588	0.232579	0.0620774	0.0277158
cg05308233	rs71019649:104788741:A:AG	-7633	55	62	0.300971	0.000411102	0.147698	0.0404168	0.0347316
cg05308233	rs7087459:104790999:T:C	-5375	55	62	0.300971	0.000411102	0.147698	0.0404168	0.0347316
cg05308233	rs7088200:104793235:G:A	-3139	55	62	0.300971	0.000411102	0.147698	0.0404168	0.0347316
cg05308233	rs7920868:104795409:C:T	-965	55	62	0.300971	0.000411102	0.147698	0.0404168	0.0347316
cg05308233	rs12415388:104796345:T:C	-29	55	62	0.300971	0.000415712	0.147605	0.0404272	0.0350134
cg05308233	rs10218853:104796787:A:C	413	55	62	0.300971	0.000411102	0.147698	0.0404168	0.0347316
cg05308233	rs7073323:104797423:A:C	1049	55	62	0.300971	0.000411102	0.147698	0.0404168	0.0347316
cg05308233	rs7087040:104799668:G:A	3294	55	62	0.300971	0.000411102	0.147698	0.0404168	0.0347316
cg05308233	rs12255761:104801866:C:T	5492	35	40	0.194175	0.000399498	0.157948	0.0431236	0.0340221
cg05308233	rs7089680:104802071:T:C	5697	55	62	0.300971	0.000411102	0.147698	0.0404168	0.0347316
cg14287027	rs10786733:104794947:G:A	-9717	72	87	0.42233	0.000639064	-0.144412	0.0409732	0.0468866
cg14287027	rs7094843:104806654:A:C	1990	72	87	0.42233	0.000639064	-0.144412	0.0409732	0.0468866
cg14287027	rs4917994:104811699:C:T	7035	72	87	0.42233	0.000639064	-0.144412	0.0409732	0.0468866
cg14287027	rs10883823:104812331:T:C	7667	72	87	0.42233	0.000639064	-0.144412	0.0409732	0.0468866
cg14287027	rs10883824:104812897:A:G	8233	72	87	0.42233	0.000639064	-0.144412	0.0409732	0.0468866
cg14287027	rs2275271	9498	72	87	0.42233	0.000639064	-0.144412	0.0409732	0.0468866
cg03493300	rs7094843:104806654:A:C	-7213	72	87	0.42233	6.94061e-05	0.122191	0.0294413	0.0097261
cg03493300	rs4917994:104811699:C:T	-2168	72	87	0.42233	6.94061e-05	0.122191	0.0294413	0.0097261
cg03493300	rs10883823:104812331:T:C	-1536	72	87	0.42233	6.94061e-05	0.122191	0.0294413	0.0097261
cg03493300	rs10883824:104812897:A:G	-970	72	87	0.42233	6.94061e-05	0.122191	0.0294413	0.0097261
cg03493300	rs2275271	295	72	87	0.42233	6.94061e-05	0.122191	0.0294413	0.0097261
cg03493300	rs7908280:104816947:C:G	3080	72	87	0.42233	6.71356e-05	0.122599	0.0294764	0.00950033
cg03493300	rs11191539:104819770:A:G	5903	72	87	0.42233	6.52851e-05	0.122909	0.0294979	0.00930889
cg03267668	rs11191539:104819770:A:G	-9337	72	87	0.42233	9.85412e-05	-0.0813153	0.0200498	0.0124995
cg03267668	rs11191541:104824199:A:G	-4908	72	87	0.42233	8.92816e-05	-0.0819767	0.0200803	0.01164
cg03267668	rs11191542:104824324:T:A	-4783	72	87	0.42233	8.92816e-05	-0.0819767	0.0200803	0.01164
cg03267668	rs943038:104826261:T:C	-2846	72	87	0.42233	8.10697e-05	-0.0826715	0.0201219	0.0108469
cg03267668	rs1926034:104829102:G:A	-5	72	87	0.42233	6.60523e-05	-0.084062	0.0201898	0.00939105
cg03267668	rs10883826:104830819:A:G	1712	72	86	0.417476	5.91693e-05	-0.0846781	0.0201953	0.00867106
cg03267668	rs943036:104836047:T:C	6940	72	86	0.417476	5.35994e-05	-0.0851312	0.0201768	0.00804752
cg03267668	rs1046411:104837816:G:A	8709	56	62	0.300971	0.000557006	-0.0786652	0.022064	0.042789
cg01778465	rs7067666	-7649	70	87	0.42233	0.000263285	-0.306245	0.080964	0.0253434
cg01778465	rs12360357:105333127:C:T	-6974	31	33	0.160194	3.47374e-08	0.599717	0.100371	3.68805e-05
cg01778465	rs3781370:105335156:T:C	-4945	33	36	0.174757	4.01421e-09	0.597724	0.0927576	8.11508e-06
cg01778465	rs11191733:105336075:G:C	-4026	33	35	0.169903	2.3631e-08	0.595514	0.0982725	2.8043e-05
cg01778465	rs10883886:105337994:T:C	-2107	33	35	0.169903	2.33471e-08	0.599939	0.0989594	2.78178e-05
cg01778465	rs12774610:105338800:G:T	-1301	33	35	0.169903	2.51612e-08	0.593652	0.0981884	2.92395e-05
cg01778465	rs1018014:105339421:A:G	-680	33	36	0.174757	4.45413e-09	0.595074	0.0926667	8.60264e-06
cg01778465	rs1018013:105339790:C:T	-311	33	35	0.169903	2.78641e-08	0.592391	0.0983448	3.14881e-05
cg01778465	rs7068070	-42	33	36	0.174757	4.49269e-09	0.594815	0.092653	8.65126e-06
cg01778465	rs4917392:105341214:A:C	1113	31	34	0.165049	4.99563e-09	0.602029	0.0941105	9.30461e-06
cg01778465	rs11191737:105344451:G:A	4350	32	34	0.165049	2.56063e-08	0.599178	0.0991657	2.96593e-05
cg01778465	rs7100958:105345327:C:T	5226	32	35	0.169903	4.18178e-09	0.603303	0.0937508	8.28913e-06
cg01778465	rs6584560:105345583:C:A	5482	32	35	0.169903	4.20782e-09	0.60335	0.0937774	8.31781e-06
cg04426842	rs3740471	738	35	39	0.18932	0.000627513	0.185638	0.0525891	0.0463317
cg19810180	rs11191751:105391725:A:G	-9873	38	43	0.208738	0.000182096	0.427969	0.11012	0.0194619
cg19810180	rs12258364:105392991:C:T	-8607	38	43	0.208738	0.000172559	0.429232	0.110019	0.0187162
cg19810180	rs34241369:105399229:A:G	-2369	32	33	0.160194	1.02595e-07	0.704426	0.122855	8.11526e-05
cg19810180	rs3824777:105400725:G:A	-873	72	87	0.42233	2.35602e-05	0.429458	0.0968526	0.0043909
cg19810180	rs3781347	-407	74	90	0.436893	0.000372491	0.366251	0.0994446	0.0323712
cg19810180	rs9665523:105401556:G:T	-42	45	49	0.237864	1.44325e-13	0.78209	0.0915721	9.02275e-09
cg19810180	rs61870170:105403300:A:G	1702	72	91	0.441748	0.000315843	-0.349723	0.093747	0.0288253
cg19810180	rs67220558:105403967:T:C	2369	74	94	0.456311	0.000417399	-0.348491	0.0954786	0.0351108
cg19810180	rs2902634:105404504:T:A	2906	74	94	0.456311	0.000419093	-0.348303	0.0954579	0.0352149
cg19810180	rs7475602:105404862:A:C	3264	74	94	0.456311	0.000420841	-0.348109	0.0954364	0.035322
cg19810180	rs880549	4531	44	48	0.23301	2.3913e-14	0.801145	0.0900406	2.75809e-09
cg19810180	rs146762971:105406755:T:TCTTGGGGGG	5157	74	94	0.456311	0.000420706	-0.347718	0.0953268	0.0353127
cg19810180	rs7914478:105407790:C:T	6192	45	49	0.237864	1.46607e-13	0.781924	0.0915861	9.1332e-09
cg19810180	rs10786761:105409785:C:T	8187	76	93	0.451456	7.39071e-05	0.40663	0.0983754	0.010165
cg19810180	rs1493173:105410382:C:T	8784	44	48	0.23301	2.50626e-14	0.801983	0.090229	2.77366e-09
cg05370896	rs3781336:105443708:A:T	-9754	22	22	0.106796	0.000315137	0.107685	0.0288613	0.0287784
cg05370896	rs2295590	-10	21	21	0.101942	0.000121543	0.116089	0.0290343	0.0145487
cg03314958	rs1078287:105479915:G:C	-9964	53	69	0.334951	2.31183e-06	0.14708	0.0293514	0.000803466
cg03314958	rs72815789:105480535:G:A	-9344	47	62	0.300971	9.28204e-06	0.139601	0.0298903	0.00220857
cg03314958	rs7088114:105482700:G:A	-7179	52	69	0.334951	2.40637e-06	0.143029	0.0285982	0.000827352
cg03314958	rs7097676:105484912:C:G	-4967	53	70	0.339806	5.21107e-06	0.138985	0.0288742	0.00144319
cg03314958	rs1389189:105486077:A:G	-3802	43	53	0.257282	0.000404565	0.122146	0.0333822	0.0343381
cg03314958	rs7072004	2052	52	68	0.330097	7.41024e-06	0.138297	0.0292598	0.00186877
cg03314958	rs6584568:105495612:T:C	5733	52	68	0.330097	7.78791e-06	0.13825	0.0293265	0.00193863
cg03314958	rs11191789:105498738:G:GA	8859	40	49	0.237864	0.000518943	0.12348	0.034432	0.0407973
cg08420981	rs72815789:105480535:G:A	-9986	47	62	0.300971	6.37611e-05	0.0658401	0.0157776	0.00914223
cg08420981	rs7088114:105482700:G:A	-7821	52	69	0.334951	0.000451083	0.0564896	0.0155734	0.0370672
cg08420981	rs7072004	1410	52	68	0.330097	0.000258138	0.0594053	0.0156821	0.0249875
cg08420981	rs6584568:105495612:T:C	5091	52	68	0.330097	0.000251826	0.0596092	0.0157068	0.0245593
cg00730670	rs879543:105500857:T:C	-9857	41	52	0.252427	8.19616e-05	0.242239	0.0590024	0.0109383
cg00730670	rs12414928:105501447:A:G	-9267	16	19	0.092233	0.000637508	0.317022	0.0899282	0.0468134
cg00730670	rs5787497:105502706:TC:T	-8008	40	51	0.247573	5.30538e-05	0.247453	0.0586107	0.00798656
cg00730670	rs752681:105502714:T:A	-8000	40	51	0.247573	5.30538e-05	0.247453	0.0586107	0.00798656
cg00730670	rs10633594:105503507:A:AAAAC	-7207	40	51	0.247573	5.30538e-05	0.247453	0.0586107	0.00798656
cg00730670	rs56149148:105508171:C:T	-2543	17	21	0.101942	2.98113e-05	0.353086	0.0807373	0.00523046
cg00730670	rs7090045:105508269:C:G	-2445	29	33	0.160194	5.90437e-07	0.375419	0.070386	0.000295888
cg00730670	rs6144057:105508910:A:AAGTGCTGGGATTAC	-1804	39	48	0.23301	7.53365e-06	0.284351	0.0602128	0.0018907
cg00730670	rs7098365:105509536:C:T	-1178	40	50	0.242718	2.59527e-05	0.261991	0.0594194	0.00471787
cg00730670	rs11395457:105509769:T:TC	-945	39	49	0.237864	1.18252e-05	0.272147	0.0590382	0.00264722
cg00730670	rs7098795:105509786:C:T	-928	15	18	0.0873786	0.000294239	0.336703	0.0897685	0.0274274
cg00730670	rs17812914:105510245:C:T	-469	15	18	0.0873786	0.000294239	0.336703	0.0897685	0.0274274
cg00730670	rs2067560:105510744:A:G	30	34	40	0.194175	3.57631e-08	0.373239	0.0625337	3.77576e-05
cg00730670	rs12762008:105513241:A:G	2527	33	38	0.184466	1.06093e-07	0.375703	0.0656104	8.33008e-05
cg00730670	rs1998294:105514002:C:T	3288	40	50	0.242718	2.6393e-05	0.261947	0.0594682	0.00477993
cg00730670	rs4918046:105515412:T:C	4698	33	38	0.184466	1.04518e-07	0.375806	0.0655898	8.23128e-05
cg00730670	rs55921327:105516342:G:A	5628	18	21	0.101942	0.000232429	0.328845	0.0861341	0.0231982
cg00730670	rs56309638:105520358:T:C	9644	18	21	0.101942	0.000249847	0.326332	0.0859366	0.0244107
cg00730670	rs56275413:105520424:C:T	9710	18	21	0.101942	0.000246435	0.326518	0.0858975	0.0241669
cg23900677	rs35696766:105536662:G:T	-5099	13	14	0.0679612	4.91804e-07	0.507668	0.0944294	0.000259305
cg23900677	rs4918049:105541586:G:A	-175	19	20	0.0970874	1.4653e-08	0.482807	0.0783228	1.99836e-05
cg08891503	rs35696766:105536662:G:T	-5288	13	14	0.0679612	1.7614e-06	0.3233	0.0636902	0.000660417
cg08891503	rs4918049:105541586:G:A	-364	19	20	0.0970874	9.43562e-08	0.305644	0.0531313	7.5904e-05
cg20382968	rs10883936:105635537:C:T	-8931	62	73	0.354369	0.000620388	0.137911	0.0390309	0.0459712
cg24587175	rs3752949:105670503:A:G	-106	43	48	0.23301	1.86735e-05	0.923966	0.20561	0.00369854
cg24587175	rs3752948:105670762:G:A	153	43	48	0.23301	1.85376e-05	0.924683	0.205684	0.00367936
cg13103297	rs200538919:105670134:TG:T	-7440	10	12	0.0582524	0.000395951	-0.187706	0.0512121	0.0338023
cg13103297	rs12767259:105679403:C:T	1829	14	16	0.0776699	0.000441797	-0.168438	0.0463585	0.0365407
cg22740801	rs4918075:105722666:A:C	-3041	41	42	0.203883	0.000237965	0.354372	0.0929827	0.0235873
cg22740801	rs7100397:105725281:T:C	-426	36	38	0.184466	3.99011e-05	0.382022	0.0889012	0.00647014
cg22740801	rs10748859:105725722:T:C	15	36	38	0.184466	3.98211e-05	0.381144	0.088686	0.00646013
cg22740801	rs6584583:105726338:T:C	631	33	34	0.165049	0.000273112	0.361976	0.0959626	0.02601
cg22740801	rs10786779:105726812:A:G	1105	36	38	0.184466	4.04305e-05	0.38155	0.0888629	0.00653276
cg22740801	rs7096960:105728162:G:A	2455	35	36	0.174757	7.60301e-05	0.384845	0.093277	0.0103782
cg22740801	rs7097109:105728280:G:A	2573	35	36	0.174757	7.60301e-05	0.384845	0.093277	0.0103782
cg22740801	rs10786780:105729020:C:T	3313	35	36	0.174757	7.58734e-05	0.385331	0.0933821	0.0103641
cg22740801	rs4918076:105729054:C:G	3347	35	36	0.174757	7.60301e-05	0.384845	0.093277	0.0103782
cg22740801	rs9325510	4180	35	36	0.174757	7.60301e-05	0.384845	0.093277	0.0103782
cg22740801	rs2066340:105730446:A:G	4739	35	36	0.174757	7.60301e-05	0.384845	0.093277	0.0103782
cg22740801	rs138183981:105731013:TTTG:T	5306	35	36	0.174757	7.60301e-05	0.384845	0.093277	0.0103782
cg22740801	rs2864007:105731034:G:T	5327	35	36	0.174757	7.60301e-05	0.384845	0.093277	0.0103782
cg22740801	rs2864006:105731088:T:C	5381	35	36	0.174757	7.60301e-05	0.384845	0.093277	0.0103782
cg22740801	rs9988675:105731338:G:A	5631	35	36	0.174757	7.60301e-05	0.384845	0.093277	0.0103782
cg22740801	rs11191887:105734894:C:A	9187	37	39	0.18932	5.42718e-05	0.372676	0.0883967	0.00812063
cg15439100	rs805690:105814459:A:C	-9882	62	79	0.383495	1.07808e-05	-0.186843	0.0403294	0.00247353
cg15439100	rs805691:105814826:C:A	-9515	62	79	0.383495	1.09624e-05	-0.186677	0.04033	0.00250499
cg15439100	rs805692:105814937:C:T	-9404	60	74	0.359223	2.84256e-05	-0.185122	0.0422112	0.00504886
cg15439100	rs805695:105816066:C:T	-8275	62	79	0.383495	1.08014e-05	-0.186317	0.0402199	0.00247704
cg15439100	rs12267001:105816274:A:C	-8067	32	35	0.169903	3.07558e-05	0.239104	0.0547754	0.00535375
cg15439100	rs805701	-4385	63	81	0.393204	3.79044e-05	-0.1735	0.0402494	0.00623225
cg15439100	rs805708:105824333:G:A	-8	60	76	0.368932	3.56109e-06	-0.196272	0.0400021	0.00109675
cg15439100	rs77840595:105824918:G:A	577	26	28	0.135922	3.324e-06	0.289971	0.058898	0.00104548
cg15439100	rs2476960:105828658:G:A	4317	60	75	0.364078	2.33222e-06	-0.20281	0.0404901	0.000808963
cg15439100	rs11191916:105832350:C:T	8009	26	28	0.135922	3.74368e-06	0.288048	0.0588529	0.00113724
cg21794496	rs200337654:105889249:A:AGATGGTCTC	-9906	40	48	0.23301	4.29605e-05	-0.231589	0.0541383	0.00683028
cg21794496	rs11191929:105889334:T:A	-9821	30	32	0.15534	0.000103239	-0.281404	0.069603	0.0129227
cg21794496	rs10786784:105892104:A:G	-7051	40	48	0.23301	3.94763e-05	-0.233391	0.0542774	0.00642057
cg21794496	rs5787510:105892542:GTGT:G	-6613	64	82	0.398058	0.000142197	-0.191946	0.048531	0.0162933
cg21794496	rs4319444:105894606:A:G	-4549	40	48	0.23301	4.38602e-05	-0.231148	0.0541041	0.00693598
cg21794496	rs57102591:105894942:AT:A	-4213	40	48	0.23301	4.35382e-05	-0.231216	0.0540956	0.00689862
cg21794496	rs4564255:105895218:G:A	-3937	40	48	0.23301	4.35382e-05	-0.231216	0.0540956	0.00689862
cg21794496	rs112496841:105895939:A:C	-3216	38	45	0.218447	0.00020433	-0.217608	0.0564611	0.0211514
cg21794496	rs6584588:105899171:C:T	16	40	48	0.23301	4.35382e-05	-0.231216	0.0540956	0.00689862
cg21794496	rs1665241:105900126:A:G	971	64	82	0.398058	0.000140667	-0.192094	0.0485317	0.0161682
cg21794496	rs637022:105901936:G:A	2781	40	48	0.23301	4.35382e-05	-0.231216	0.0540956	0.00689862
cg21794496	rs668349:105904138:A:G	4983	40	49	0.237864	7.57082e-05	-0.219038	0.0530747	0.0103474
cg21794496	rs12221084:105904177:G:A	5022	30	32	0.15534	0.000101028	-0.281764	0.0695905	0.0127236
cg21794496	rs584073:105904192:A:G	5037	40	48	0.23301	4.32204e-05	-0.231284	0.054087	0.00686146
cg21794496	rs680026:105904375:C:T	5220	40	48	0.23301	4.32204e-05	-0.231284	0.054087	0.00686146
cg21794496	rs141870801:105905380:TGAC:T	6225	40	48	0.23301	4.32204e-05	-0.231284	0.054087	0.00686146
cg21794496	rs604178:105906924:C:T	7769	40	48	0.23301	4.25973e-05	-0.231416	0.0540695	0.00678612
cg21794496	rs11191932:105908597:G:A	9442	30	32	0.15534	9.39857e-05	-0.282821	0.0695144	0.0120851
cg26685033	rs12775992:105941325:C:T	-4939	47	52	0.252427	0.000228603	0.137129	0.0358742	0.0229311
cg26685033	rs527154:105943683:C:G	-2581	72	98	0.475728	0.000572674	0.102191	0.0287286	0.0436153
cg26685033	rs10883977:105946252:A:G	-12	47	52	0.252427	0.000225952	0.137222	0.0358674	0.0227454
cg26685033	rs696212:105949689:G:T	3425	65	82	0.398058	0.00069233	0.106637	0.030462	0.0495336
cg26685033	rs726934:105950609:T:C	4345	47	52	0.252427	0.000222138	0.137437	0.0358786	0.0224716
cg26685033	rs34139214:105952965:T:C	6701	47	52	0.252427	0.000222138	0.137437	0.0358786	0.0224716
cg07592724	rs57331881:105982661:A:G	-9547	11	11	0.0533981	0.000228808	0.359862	0.0941491	0.0229459
cg00899160	rs1865926:106042502:G:T	8029	44	55	0.26699	0.000369411	0.234211	0.0635514	0.0321866
cg23487032	rs1147611:106025258:G:T	-9542	61	88	0.427184	0.000551413	0.169221	0.0474234	0.0425008
cg23487032	rs641071:106028157:G:T	-6643	61	88	0.427184	0.000531657	0.169594	0.0473848	0.0414639
cg23487032	rs568526:106033439:T:C	-1361	59	84	0.407767	0.00012502	0.188219	0.0471655	0.0148569
cg23487032	rs276204:106035313:C:G	513	59	84	0.407767	0.000121764	0.188488	0.0471473	0.0145682
cg23487032	rs157077:106037894:T:C	3094	72	103	0.5	0.00021221	0.187706	0.0488375	0.0217331
cg23487032	rs7099030:106038347:T:C	3547	54	73	0.354369	0.000497295	0.180783	0.0502351	0.0396247
cg23487032	rs156697	4385	59	84	0.407767	0.000115601	0.188963	0.0470983	0.0140311
cg23487032	rs276203:106039303:A:G	4503	59	84	0.407767	0.000115601	0.188963	0.0470983	0.0140311
cg23487032	rs6584592:106039780:C:T	4980	54	73	0.354369	0.0004616	0.182468	0.0503975	0.0376644
cg23487032	rs1865926:106042502:G:T	7702	44	55	0.26699	4.93497e-05	0.235197	0.055456	0.00756857
cg23487032	rs7079338:106043132:C:T	8332	42	52	0.252427	0.000444572	0.209968	0.0578175	0.0366907
cg17733466	rs1147611:106025258:G:T	-9545	61	88	0.427184	0.000428555	0.217096	0.0596049	0.0357734
cg17733466	rs641071:106028157:G:T	-6646	61	88	0.427184	0.000418087	0.217372	0.0595628	0.0351549
cg17733466	rs11191980:106032213:T:C	-2590	41	51	0.247573	0.000240722	0.272174	0.071476	0.0237785
cg17733466	rs568526:106033439:T:C	-1364	59	84	0.407767	0.000107743	0.239206	0.0593367	0.0133248
cg17733466	rs17826034:106033504:A:G	-1299	41	51	0.247573	0.000240581	0.272155	0.071468	0.0237691
cg17733466	rs2297235:106034491:A:G	-312	41	51	0.247573	0.000240722	0.272174	0.071476	0.0237785
cg17733466	rs276204:106035313:C:G	510	59	84	0.407767	0.000105523	0.239463	0.0593168	0.0131305
cg17733466	rs7099030:106038347:T:C	3544	54	73	0.354369	0.000171821	0.244549	0.0626629	0.0186574
cg17733466	rs156697	4382	59	84	0.407767	0.000102127	0.239786	0.0592659	0.0128226
cg17733466	rs276203:106039303:A:G	4500	59	84	0.407767	0.000102127	0.239786	0.0592659	0.0128226
cg17733466	rs6584592:106039780:C:T	4977	54	73	0.354369	0.00016438	0.246183	0.062883	0.0180864
cg17733466	rs1865926:106042502:G:T	7699	44	55	0.26699	2.18623e-05	0.308746	0.0693284	0.00415939
cg17733466	rs7079338:106043132:C:T	8329	42	52	0.252427	0.000189956	0.279993	0.0722641	0.0200734
cg17383262	rs1147611:106025258:G:T	-9660	61	88	0.427184	0.000325398	0.143842	0.0386472	0.0294234
cg17383262	rs45596840:106028154:G:A	-6764	43	55	0.26699	6.10227e-05	0.184436	0.0440734	0.0088626
cg17383262	rs641071:106028157:G:T	-6761	61	88	0.427184	0.000316741	0.144037	0.038619	0.0288798
cg17383262	rs11191980:106032213:T:C	-2705	41	51	0.247573	1.53697e-05	0.205701	0.0452749	0.00320943
cg17383262	rs568526:106033439:T:C	-1479	59	84	0.407767	0.000170943	0.151239	0.0387392	0.0185878
cg17383262	rs17826034:106033504:A:G	-1414	41	51	0.247573	1.54382e-05	0.205637	0.0452719	0.00322037
cg17383262	rs2297235:106034491:A:G	-427	41	51	0.247573	1.53697e-05	0.205701	0.0452749	0.00320943
cg17383262	rs276204:106035313:C:G	395	59	84	0.407767	0.000166713	0.151453	0.0387247	0.0182656
cg17383262	rs7099030:106038347:T:C	3429	54	73	0.354369	9.1899e-05	0.165005	0.0404958	0.0118871
cg17383262	rs156697	4267	59	84	0.407767	0.00016187	0.151645	0.0386926	0.0178933
cg17383262	rs276203:106039303:A:G	4385	59	84	0.407767	0.00016187	0.151645	0.0386926	0.0178933
cg17383262	rs6584592:106039780:C:T	4862	54	73	0.354369	9.15155e-05	0.165693	0.0406533	0.0118502
cg17383262	rs1865926:106042502:G:T	7584	44	55	0.26699	2.28015e-06	0.221172	0.0441082	0.000795739
cg17383262	rs7079338:106043132:C:T	8214	42	52	0.252427	3.43586e-05	0.200451	0.0462262	0.00581295
cg23659134	rs1147611:106025258:G:T	-9911	61	88	0.427184	1.33203e-07	0.324581	0.057195	9.86054e-05
cg23659134	rs45596840:106028154:G:A	-7015	43	55	0.26699	9.80274e-05	0.286258	0.0705576	0.0124501
cg23659134	rs641071:106028157:G:T	-7012	61	88	0.427184	1.29844e-07	0.324676	0.0571537	9.66796e-05
cg23659134	rs11191980:106032213:T:C	-2956	41	51	0.247573	9.13548e-06	0.335637	0.0718031	0.00218195
cg23659134	rs568526:106033439:T:C	-1730	59	84	0.407767	1.32928e-08	0.348919	0.0564089	1.85737e-05
cg23659134	rs17826034:106033504:A:G	-1665	41	51	0.247573	9.15046e-06	0.335577	0.0717965	0.00218471
cg23659134	rs2297235:106034491:A:G	-678	41	51	0.247573	9.13548e-06	0.335637	0.0718031	0.00218195
cg23659134	rs276204:106035313:C:G	144	59	84	0.407767	1.32233e-08	0.348917	0.0563982	1.85041e-05
cg23659134	rs157077:106037894:T:C	2725	72	103	0.5	3.54541e-07	0.327042	0.0599881	0.000203867
cg23659134	rs7099030:106038347:T:C	3178	54	73	0.354369	2.12042e-07	0.339271	0.0609159	0.000139452
cg23659134	rs156697	4016	59	84	0.407767	1.26737e-08	0.349101	0.0563439	1.79282e-05
cg23659134	rs276203:106039303:A:G	4134	59	84	0.407767	1.26737e-08	0.349101	0.0563439	1.79282e-05
cg23659134	rs6584592:106039780:C:T	4611	54	73	0.354369	1.77152e-07	0.342512	0.0610495	0.000122763
cg23659134	rs1865926:106042502:G:T	7333	44	55	0.26699	1.08998e-06	0.36229	0.0698048	0.000463918
cg23659134	rs7079338:106043132:C:T	7963	42	52	0.252427	4.88858e-06	0.349264	0.0723239	0.00137659
cg25406516	rs568526:106033439:T:C	-7926	59	84	0.407767	0.000666483	-0.13628	0.0388038	0.0482375
cg25406516	rs276204:106035313:C:G	-6052	59	84	0.407767	0.000663659	-0.136305	0.0387969	0.0480873
cg25406516	rs157077:106037894:T:C	-3471	72	103	0.5	0.00034321	-0.147283	0.0397354	0.0305748
cg25406516	rs156697	-2180	59	84	0.407767	0.000660769	-0.136274	0.0387739	0.0479486
cg25406516	rs276203:106039303:A:G	-2062	59	84	0.407767	0.000660769	-0.136274	0.0387739	0.0479486
cg07488549	rs35528873:106045962:GT:G	-7015	55	78	0.378641	0.000404359	-0.21781	0.0595245	0.0343263
cg07488549	rs276210:106046403:A:G	-6574	55	78	0.378641	0.000402303	-0.217915	0.059529	0.0341921
cg07488549	rs157076:106048294:C:G	-4683	56	78	0.378641	0.00056459	-0.214023	0.0600965	0.0431936
cg07488549	rs11191989:106050315:T:C	-2662	40	49	0.237864	0.000330848	-0.267155	0.0718707	0.0297716
cg07488549	10:106053321:A:ATTTTTTTT	344	55	75	0.364078	0.000509114	-0.221358	0.0616282	0.0402535
cg07488549	rs156699	664	56	79	0.383495	0.000632021	-0.210109	0.0595573	0.0465401
cg07488549	rs157081:106055024:C:T	2047	56	79	0.383495	0.000632941	-0.210151	0.0595766	0.0465867
cg07488549	rs157080:106055963:C:A	2986	56	79	0.383495	0.000627915	-0.210262	0.0595678	0.0463433
cg07488549	rs3740466:106061169:C:T	8192	42	51	0.247573	0.000535527	-0.258513	0.0722722	0.0416727
cg19939250	rs11192007:106086395:T:C	-9759	45	52	0.252427	0.000372377	-0.141649	0.0384595	0.0323636
cg19939250	rs10883992:106089285:A:C	-6869	47	57	0.276699	6.70303e-05	-0.146652	0.0352558	0.00948929
cg19939250	rs11192008:106089426:G:A	-6728	47	57	0.276699	6.70303e-05	-0.146652	0.0352558	0.00948929
cg19939250	rs41291846:106093366:G:T	-2788	45	55	0.26699	9.20084e-05	-0.143733	0.0352779	0.0118978
cg19939250	rs17754543:106093483:A:T	-2671	45	55	0.26699	9.20084e-05	-0.143733	0.0352779	0.0118978
cg19939250	rs34349230:106093686:G:A	-2468	45	55	0.26699	9.20084e-05	-0.143733	0.0352779	0.0118978
cg19939250	rs3740464:106095598:G:A	-556	45	55	0.26699	7.6343e-05	-0.144764	0.0350968	0.0104092
cg19939250	rs79660336:106098659:A:G	2505	45	55	0.26699	7.6343e-05	-0.144764	0.0350968	0.0104092
cg19939250	rs7095770	3254	45	55	0.26699	7.50711e-05	-0.144854	0.03508	0.0102829
cg19939250	rs12360432:106102054:T:C	5900	46	56	0.271845	0.000103199	-0.142468	0.0352373	0.012919
cg19939250	rs12355780:106102074:A:C	5920	46	56	0.271845	0.000102728	-0.142489	0.0352317	0.0128763
cg19939250	rs12355823:106102402:A:G	6248	45	55	0.26699	7.67006e-05	-0.144743	0.0351024	0.0104418
cg19939250	rs72129817:106103351:AAGAC:A	7197	45	55	0.26699	7.7633e-05	-0.144763	0.0351349	0.0105262
cg19939250	rs17754658:106104397:G:C	8243	45	55	0.26699	7.59247e-05	-0.144901	0.0351174	0.0103687
cg19939250	rs12360096:106104914:C:A	8760	45	55	0.26699	7.59247e-05	-0.144901	0.0351174	0.0103687
cg19939250	rs56407837:106105070:A:G	8916	45	55	0.26699	7.59247e-05	-0.144901	0.0351174	0.0103687
cg19939250	rs11192015:106105609:A:G	9455	45	55	0.26699	7.59247e-05	-0.144901	0.0351174	0.0103687
cg16313313	rs9645570:106165941:A:G	-9794	68	88	0.427184	6.02044e-06	-0.207818	0.0434954	0.00160442
cg16313313	rs10786792:106166570:G:A	-9165	43	48	0.23301	0.000435985	-0.202834	0.0557657	0.0362099
cg16313313	rs5787517:106169622:A:ATCTTTG	-6113	74	95	0.461165	2.93289e-05	-0.199355	0.0455408	0.00516906
cg16313313	rs7895680:106171382:G:A	-4353	72	93	0.451456	1.73898e-05	-0.2016	0.0446813	0.00350852
cg16313313	rs7097925:106175274:G:A	-461	68	88	0.427184	6.02643e-06	-0.207709	0.0434748	0.00160562
cg16313313	rs2864011:106175589:C:T	-146	72	93	0.451456	1.76632e-05	-0.201606	0.044722	0.00354963
cg16313313	rs10884000	3328	70	90	0.436893	1.05365e-05	-0.20463	0.0441139	0.00243126
cg18104354	rs56106616:106389479:C:G	-1225	17	18	0.0873786	0.000325966	0.270136	0.0725891	0.0294595
cg18104354	10:106390594:T:TG	-110	17	18	0.0873786	0.000325966	0.270136	0.0725891	0.0294595
cg18104354	rs72811687:106398035:T:G	7331	17	18	0.0873786	0.000325966	0.270136	0.0725891	0.0294595
cg23493016	rs78911933:106433438:G:A	-7341	18	18	0.0873786	0.000278443	-0.236212	0.0627131	0.026377
cg23493016	rs11192156:106438221:G:A	-2558	16	16	0.0776699	0.000359971	-0.247199	0.06694	0.0316136
cg23493016	rs36011900:106441536:G:A	757	22	22	0.106796	0.000402232	-0.212475	0.0580421	0.0341876
cg23493016	rs35025200:106441844:G:A	1065	22	22	0.106796	0.000399608	-0.212705	0.0580749	0.03403
cg21295171	rs4917428:106539496:A:G	2498	45	51	0.247573	0.000328973	0.115571	0.0310774	0.0296508
cg21295171	rs731163:106541900:G:A	4902	46	52	0.252427	0.000558736	0.111662	0.031327	0.0428842
cg00679256	rs472548	-4709	66	80	0.38835	0.000259691	-0.143683	0.0379473	0.0250926
cg00679256	rs560630:107707902:C:T	-2318	66	80	0.38835	0.000189445	-0.146597	0.0378283	0.0200376
cg15748409	rs11193794:109675597:G:T	117	67	88	0.427184	0.000690316	0.106876	0.0305225	0.0494338
cg15748409	rs6584845:109676660:G:C	1180	68	91	0.441748	0.000581376	0.107376	0.0302242	0.0440509
cg15748409	rs6584846:109676661:C:A	1181	68	91	0.441748	0.000581376	0.107376	0.0302242	0.0440509
cg27514072	rs113406526:110772514:T:TAAG	-6607	42	49	0.237864	0.000106844	-0.311072	0.0771198	0.0132456
cg27514072	rs11194347:110776843:A:G	-2278	14	16	0.0776699	3.896e-05	-0.49712	0.115517	0.00635896
cg27514072	rs79674155:110776875:G:A	-2246	13	15	0.0728155	3.04927e-05	-0.514007	0.117692	0.00531926
cg27514072	rs7073705:110778737:C:T	-384	13	15	0.0728155	4.66241e-05	-0.506048	0.118898	0.00725905
cg27514072	rs77277706:110778946:T:TATA	-175	14	16	0.0776699	3.73038e-05	-0.497646	0.115335	0.00616395
cg27514072	rs17125584:110781402:T:C	2281	14	16	0.0776699	3.42654e-05	-0.49885	0.115022	0.00580127
cg27514072	rs6584910:110787993:A:T	8872	40	47	0.228155	0.000690321	-0.274663	0.0784408	0.0494338
cg14672308	rs34888998:110876921:A:AC	-9665	38	45	0.218447	5.9339e-05	0.135305	0.0322755	0.00868845
cg14672308	rs10219041:110877244:T:C	-9342	38	45	0.218447	5.9339e-05	0.135305	0.0322755	0.00868845
cg14672308	rs12254267:110877734:G:T	-8852	33	38	0.184466	0.000546906	0.126825	0.0355181	0.0422701
cg14672308	rs12782863:110878032:A:C	-8554	38	45	0.218447	5.9339e-05	0.135305	0.0322755	0.00868845
cg14672308	rs112601830:110879251:T:G	-7335	37	44	0.213592	8.13344e-05	0.132922	0.0323595	0.0108738
cg14672308	rs2225055:110879428:A:G	-7158	37	44	0.213592	9.09873e-05	0.13221	0.0324257	0.0118003
cg14672308	rs11194407:110880064:G:A	-6522	37	44	0.213592	8.83513e-05	0.132377	0.0324034	0.0115502
cg14672308	rs7906811:110881010:G:T	-5576	37	44	0.213592	8.64124e-05	0.132487	0.0323826	0.0113717
cg14672308	rs1998882:110882063:C:A	-4523	37	44	0.213592	8.71663e-05	0.132441	0.03239	0.0114433
cg14672308	rs1998883:110882259:A:T	-4327	37	44	0.213592	8.64124e-05	0.132487	0.0323826	0.0113717
cg14672308	rs12261396:110882963:T:C	-3623	37	44	0.213592	8.64124e-05	0.132487	0.0323826	0.0113717
cg14672308	rs7070536:110883467:C:T	-3119	37	44	0.213592	8.64124e-05	0.132487	0.0323826	0.0113717
cg14672308	rs35112797:110884473:T:C	-2113	37	44	0.213592	8.64124e-05	0.132487	0.0323826	0.0113717
cg14672308	rs139599644:110884668:A:ATATAT	-1918	37	44	0.213592	8.64124e-05	0.132487	0.0323826	0.0113717
cg14672308	rs11194409:110884770:C:T	-1816	37	44	0.213592	8.64124e-05	0.132487	0.0323826	0.0113717
cg14672308	rs6584920:110887847:T:G	1261	38	45	0.218447	4.21873e-05	0.137414	0.0320872	0.00673922
cg14672308	rs6584921:110887957:T:G	1371	38	45	0.218447	4.18231e-05	0.137448	0.0320782	0.00669647
cg14672308	rs11194413:110888671:A:G	2085	38	45	0.218447	4.32966e-05	0.137157	0.0320783	0.00687002
cg14672308	rs12251372:110888957:A:G	2371	38	45	0.218447	4.30515e-05	0.137187	0.0320741	0.00684094
cg14672308	rs7922247:110889524:C:T	2938	41	49	0.237864	0.000286342	0.119254	0.0317286	0.0269228
cg14672308	rs35496369:110889761:C:A	3175	33	40	0.194175	0.000126433	0.130563	0.0327429	0.0149855
cg05278858	rs10884731:111027126:G:C	-9913	29	36	0.174757	6.55188e-05	-0.257509	0.0618157	0.00933425
cg05278858	rs830066	-8152	54	72	0.349515	6.18039e-05	0.207744	0.0496834	0.00894492
cg05278858	rs861224:111029297:C:T	-7742	48	60	0.291262	6.50783e-05	-0.224629	0.0538994	0.0092864
cg05278858	rs2476987:111029340:G:A	-7699	48	60	0.291262	9.03428e-05	-0.221374	0.0542684	0.0117382
cg05278858	rs866691:111029349:C:A	-7690	48	60	0.291262	9.03428e-05	-0.221374	0.0542684	0.0117382
cg05278858	rs2478450:111029476:C:G	-7563	48	60	0.291262	6.50783e-05	-0.224629	0.0538994	0.0092864
cg05278858	rs12570469:111029501:C:T	-7538	29	36	0.174757	6.55188e-05	-0.257509	0.0618157	0.00933425
cg05278858	rs830065:111029791:T:C	-7248	48	60	0.291262	6.50783e-05	-0.224629	0.0538994	0.0092864
cg05278858	rs1408370:111029895:C:T	-7144	26	33	0.160194	7.56334e-06	-0.289912	0.0614032	0.00189554
cg05278858	rs72818320:111030440:G:A	-6599	26	33	0.160194	7.23451e-06	-0.291132	0.0615177	0.00183964
cg05278858	rs72818321:111030463:G:A	-6576	26	33	0.160194	7.23451e-06	-0.291132	0.0615177	0.00183964
cg05278858	rs2478446:111030752:T:C	-6287	48	60	0.291262	5.8477e-05	-0.226399	0.0539547	0.00859192
cg05278858	rs72818324:111030793:G:A	-6246	29	36	0.174757	6.48608e-05	-0.258336	0.0619742	0.00926217
cg05278858	rs34662607:111030822:CTT:C	-6217	29	36	0.174757	6.5164e-05	-0.25895	0.06214	0.00929506
cg05278858	rs2476989:111031003:A:G	-6036	48	60	0.291262	5.8477e-05	-0.226399	0.0539547	0.00859192
cg05278858	rs2478445:111031007:T:C	-6032	48	60	0.291262	5.8477e-05	-0.226399	0.0539547	0.00859192
cg05278858	rs2476990:111031021:A:G	-6018	54	72	0.349515	5.62981e-05	-0.209122	0.0497175	0.00834535
cg05278858	rs2476991:111031097:A:G	-5942	51	65	0.315534	1.3924e-05	-0.236227	0.0517086	0.00298675
cg05278858	rs72818326:111031292:G:A	-5747	29	36	0.174757	6.49793e-05	-0.258353	0.0619853	0.00927528
cg05278858	rs12573131:111031324:A:T	-5715	26	33	0.160194	7.17007e-06	-0.291349	0.0615347	0.00182728
cg05278858	rs830062:111031977:T:G	-5062	48	60	0.291262	5.95881e-05	-0.226102	0.0539483	0.00871243
cg05278858	rs830061:111032239:A:G	-4800	48	60	0.291262	5.56027e-05	-0.2272	0.053973	0.00826994
cg05278858	rs830060:111032261:T:C	-4778	48	60	0.291262	5.57629e-05	-0.227181	0.0539784	0.00828691
cg05278858	rs12217421:111032599:C:T	-4440	29	36	0.174757	6.21146e-05	-0.259343	0.0620437	0.0089743
cg05278858	rs7075771:111032923:C:T	-4116	31	38	0.184466	7.48705e-07	-0.311956	0.0591016	0.000354254
cg05278858	rs1830806:111033505:A:G	-3534	51	67	0.325243	9.84303e-07	-0.25485	0.0488772	0.00043274
cg05278858	rs10748992:111035026:A:G	-2013	51	67	0.325243	9.36193e-07	-0.255536	0.0488982	0.000417797
cg05278858	rs7914053:111035817:G:A	-1222	26	33	0.160194	6.7772e-06	-0.293172	0.0617378	0.00175263
cg05278858	rs5020981:111036729:T:C	-310	51	67	0.325243	8.93305e-07	-0.256059	0.0488951	0.000403221
cg05278858	rs67618860:111037233:GCT:G	194	48	60	0.291262	8.98477e-08	-0.293919	0.0509956	7.36112e-05
cg05278858	rs7904172:111037272:T:C	233	51	67	0.325243	9.78838e-07	-0.255479	0.0489856	0.000431419
cg05278858	rs57922139:111038267:G:A	1228	54	73	0.354369	2.76455e-05	-0.215707	0.0491043	0.00494603
cg05278858	rs10787144:111038509:A:G	1470	51	68	0.330097	5.79264e-07	-0.257511	0.0482397	0.000291766
cg05278858	rs10787145:111038708:T:C	1669	51	68	0.330097	5.79264e-07	-0.257511	0.0482397	0.000291766
cg05278858	rs58413319:111038998:G:A	1959	26	34	0.165049	5.28247e-06	-0.291066	0.060511	0.00145772
cg05278858	rs7071407:111039352:C:T	2313	51	67	0.325243	9.49606e-07	-0.255792	0.0489785	0.000421993
cg05278858	rs10884732:111039537:A:C	2498	51	67	0.325243	9.49606e-07	-0.255792	0.0489785	0.000421993
cg05278858	rs7900683:111040141:C:G	3102	51	67	0.325243	9.54511e-07	-0.255717	0.0489755	0.000423649
cg05278858	rs7901278:111040398:G:A	3359	26	33	0.160194	6.791e-06	-0.294127	0.0619455	0.00175517
cg05278858	rs7904522:111040772:A:G	3733	51	67	0.325243	9.59007e-07	-0.255677	0.0489783	0.000425163
cg05278858	rs1926558:111041173:C:T	4134	26	33	0.160194	6.87713e-06	-0.293976	0.0619543	0.00177191
cg05278858	rs11194532:111041352:G:T	4313	26	33	0.160194	6.87713e-06	-0.293976	0.0619543	0.00177191
cg05278858	rs56901007:111041775:A:T	4736	26	33	0.160194	6.87713e-06	-0.293976	0.0619543	0.00177191
cg05278858	rs9651462:111042873:T:C	5834	51	67	0.325243	9.65319e-07	-0.255618	0.0489814	0.000427124
cg05278858	rs72818352:111042971:G:A	5932	26	33	0.160194	6.26672e-06	-0.29533	0.0619396	0.00165367
cg05278858	rs72818359:111044414:G:A	7375	26	34	0.165049	4.66643e-06	-0.294027	0.0607423	0.00133129
cg05278858	rs10787146:111045572:G:A	8533	51	67	0.325243	9.5652e-07	-0.257617	0.049344	0.000424383
cg05278858	rs11597266:111046701:C:T	9662	38	49	0.237864	2.10212e-07	-0.292321	0.0524673	0.000138559
cg04246070	rs12569662:111609452:T:G	-2640	34	39	0.18932	0.000331932	0.139165	0.037448	0.0298445
cg04246070	rs11194892	-1710	40	48	0.23301	0.000361683	0.123642	0.0334938	0.0317234
cg04246070	rs28677155:111610442:G:A	-1650	40	48	0.23301	0.000355673	0.123812	0.0334959	0.0313492
cg04246070	rs111302144:111610588:G:A	-1504	40	48	0.23301	0.000356383	0.123808	0.0335002	0.0313877
cg04246070	rs112969382:111610606:G:A	-1486	40	48	0.23301	0.000356383	0.123808	0.0335002	0.0313877
cg04246070	rs7918523:111611584:T:C	-508	41	49	0.237864	0.000288351	0.125751	0.033475	0.0270553
cg04246070	rs4543916:111611808:C:T	-284	42	50	0.242718	0.000263292	0.126683	0.0334921	0.0253438
cg04246070	rs7918778:111611835:T:C	-257	42	50	0.242718	0.000264601	0.126558	0.0334716	0.0254327
cg04246070	rs7902806:111612285:C:T	193	41	49	0.237864	0.000291773	0.125768	0.0335095	0.0272707
cg04246070	rs7902911:111612350:C:T	258	41	48	0.23301	0.000140065	0.135596	0.0342475	0.0161191
cg04246070	rs11194893:111612577:T:C	485	40	48	0.23301	0.00038529	0.123521	0.0336279	0.0331445
cg04246070	rs4606415:111613068:A:T	976	41	49	0.237864	0.000306632	0.125538	0.0335755	0.0282385
cg04246070	rs34182538:111614289:A:AG	2197	54	67	0.325243	2.77347e-05	0.132911	0.030262	0.00495791
cg04246070	rs12249715:111614536:A:G	2444	41	49	0.237864	0.00033462	0.125162	0.033701	0.0300181
cg04246070	10:111614644	2552	33	37	0.179612	0.000471791	0.141264	0.0390861	0.038229
cg04246070	rs67701529:111614843:A:G	2751	54	67	0.325243	2.76455e-05	0.133008	0.0302785	0.00494603
cg04246070	rs59984897:111615035:A:G	2943	41	49	0.237864	0.000338663	0.125123	0.0337217	0.0302749
cg04246070	rs34512391:111616174:C:T	4082	39	47	0.228155	0.000392637	0.124829	0.0340346	0.0336074
cg15071417	rs492943:111629030:T:A	-1830	48	54	0.262136	0.000642711	-0.140814	0.0399716	0.0470575
cg19777638	rs1815249:111655790:C:T	657	74	103	0.5	0.00059058	-0.0972749	0.0274169	0.0445279
cg19777638	rs10884916:111658925:T:C	3792	73	102	0.495146	0.000652484	-0.0961317	0.0273229	0.0475553
cg19777638	rs6584961:111662143:T:C	7010	74	103	0.5	0.000614015	-0.0965889	0.0273124	0.0456525
cg19777638	rs944968:111662938:T:C	7805	74	103	0.5	0.000616516	-0.0965119	0.0273	0.045774
cg19777638	rs11194907:111663943:A:G	8810	74	103	0.5	0.000620464	-0.0964176	0.0272879	0.0459744
cg19777638	rs7078789	9462	74	103	0.5	0.000620097	-0.0963909	0.027279	0.0459584
cg00817464	rs1815249:111655790:C:T	-7087	74	103	0.5	1.58204e-07	-0.371999	0.0660032	0.000112781
cg00817464	rs10884916:111658925:T:C	-3952	73	102	0.495146	1.42435e-07	-0.371568	0.06565	0.000104026
cg00817464	rs1889303:111659454:A:T	-3423	74	101	0.490291	7.64968e-07	-0.35889	0.0680583	0.000359841
cg00817464	rs4918471:111660500:C:A	-2377	52	65	0.315534	2.94903e-05	-0.330508	0.0755261	0.00518984
cg00817464	rs6584961:111662143:T:C	-734	74	103	0.5	1.62879e-07	-0.370118	0.0657465	0.000115295
cg00817464	rs7922330:111662322:A:C	-555	52	65	0.315534	2.79277e-05	-0.330928	0.0753787	0.00498311
cg00817464	rs944968:111662938:T:C	61	74	103	0.5	1.648e-07	-0.369802	0.0657215	0.000116376
cg00817464	rs11194907:111663943:A:G	1066	74	103	0.5	1.6583e-07	-0.369547	0.0656926	0.000116954
cg00817464	rs7078789	1718	74	103	0.5	1.78509e-07	-0.368591	0.0657181	0.000123449
cg00817464	rs944969:111667664:T:C	4787	74	102	0.495146	3.08334e-07	-0.365481	0.0666464	0.000184864
cg00817464	rs3758408:111669132:T:C	6255	74	103	0.5	1.68163e-07	-0.369265	0.0656794	0.000118266
cg00817464	rs3758409:111669239:T:G	6362	44	55	0.26699	0.000185268	-0.301612	0.0777036	0.0197153
cg00817464	rs7899805:111671177:G:A	8300	55	69	0.334951	7.29639e-07	-0.376465	0.0712417	0.000347804
cg00817464	rs7087731:111672028:C:A	9151	74	102	0.495146	3.08334e-07	-0.365481	0.0666464	0.000184864
cg24838825	rs59804002:111692043:G:T	-1881	29	30	0.145631	0.000330199	-0.193505	0.0520492	0.029729
cg24838825	rs734165:111697789:C:T	3865	25	26	0.126214	0.000683134	-0.191865	0.0547457	0.0490684
cg10366076	rs55728195:111715599:G:A	-8368	30	31	0.150485	0.000105722	-0.306374	0.0759008	0.0131476
cg10366076	rs731793:111716667:G:C	-7300	33	34	0.165049	0.000549564	-0.269077	0.0753865	0.0424053
cg10366076	rs4565840:111717140:A:G	-6827	33	34	0.165049	0.000549564	-0.269077	0.0753865	0.0424053
cg10366076	rs12571674:111717608:A:G	-6359	25	26	0.126214	0.000549503	-0.289052	0.0809822	0.0424025
cg10366076	rs12570612:111717685:T:C	-6282	33	34	0.165049	0.000549564	-0.269077	0.0753865	0.0424053
cg10366076	rs12247564:111721400:G:A	-2567	30	31	0.150485	0.000105722	-0.306374	0.0759008	0.0131476
cg10366076	rs12267704:111722008:C:T	-1959	30	31	0.150485	0.000105722	-0.306374	0.0759008	0.0131476
cg10366076	rs12267714:111722052:C:T	-1915	30	31	0.150485	0.000105722	-0.306374	0.0759008	0.0131476
cg10366076	rs12242642:111724213:G:A	246	30	31	0.150485	0.000105722	-0.306374	0.0759008	0.0131476
cg10366076	rs12259261:111725145:A:G	1178	30	31	0.150485	0.000105722	-0.306374	0.0759008	0.0131476
cg10366076	rs72828232:111725298:C:T	1331	25	26	0.126214	0.000549707	-0.289078	0.0809918	0.0424124
cg10366076	rs12246851:111726340:C:T	2373	30	31	0.150485	0.000105722	-0.306374	0.0759008	0.0131476
cg10366076	rs7073324:111730474:C:T	6507	30	31	0.150485	0.000105722	-0.306374	0.0759008	0.0131476
cg10366076	rs12570820:111732507:G:A	8540	30	31	0.150485	0.000105722	-0.306374	0.0759008	0.0131476
cg10366076	rs1271354:111733795:T:C	9828	33	34	0.165049	0.000385982	-0.278169	0.0757404	0.0331872
cg10366076	rs111481776:111733866:G:A	9899	30	31	0.150485	0.000137725	-0.302372	0.0762805	0.0159252
cg10366076	rs75063896:111733944:G:A	9977	33	34	0.165049	0.000386861	-0.278202	0.0757629	0.0332428
cg05140650	rs1891374:111966844:C:T	810	39	43	0.208738	0.000132852	-0.180528	0.0454286	0.0155302
cg05140650	rs1342273	7305	39	43	0.208738	0.000129703	-0.179883	0.0451913	0.015265
cg05140650	rs1977830:111975040:T:C	9006	48	53	0.257282	0.000352308	-0.163307	0.0441483	0.0311426
cg05140650	rs1977829:111975041:G:A	9007	39	43	0.208738	0.000164544	-0.178447	0.0455843	0.0180992
cg13996003	rs3793889:112027656:A:G	-6885	25	27	0.131068	4.95775e-05	-0.627922	0.148097	0.00759429
cg13996003	rs10509912:112029405:T:A	-5136	33	35	0.169903	0.000554891	-0.507977	0.142432	0.0426835
cg13996003	rs67762893:112034590:A:G	49	30	33	0.160194	3.72962e-07	-0.71103	0.130701	0.000211466
cg08547786	rs12571844:112152524:C:A	-7347	46	52	0.252427	8.7269e-05	0.0840428	0.0205553	0.0114539
cg08547786	rs17824180	-1877	45	51	0.247573	9.61636e-05	0.0830613	0.0204468	0.0122795
cg23313755	rs10444086	-1114	55	69	0.334951	3.77463e-07	0.216609	0.0398372	0.000213256
cg25135219	rs2419563:112193737:C:G	-31	45	58	0.281553	9.54156e-05	0.149906	0.0368823	0.0122118
cg25135219	rs17127392:112194290:C:T	522	29	33	0.160194	0.000587406	0.173718	0.0489404	0.0443747
cg25135219	rs33997636:112194814:AC:A	1046	45	57	0.276699	0.000257044	0.146455	0.0386497	0.0249144
cg25135219	rs4918517:112195899:A:G	2131	45	58	0.281553	0.000379201	0.139263	0.0378659	0.0327693
cg25135219	rs1981112	3690	44	56	0.271845	0.000297972	0.142849	0.0381217	0.0276723
cg25135219	rs7085953:112197847:C:T	4079	44	56	0.271845	0.000302458	0.142835	0.0381616	0.0279739
cg05464378	rs12355893:112307172:T:G	-9945	32	34	0.165049	8.37936e-06	0.398862	0.0849372	0.00204745
cg05464378	rs149819657:112307836:CTTAT:C	-9281	32	34	0.165049	8.37936e-06	0.398862	0.0849372	0.00204745
cg05464378	rs11195176:112310942:C:T	-6175	32	34	0.165049	8.30651e-06	0.398974	0.0849218	0.00203521
cg05464378	rs11195177:112311842:A:G	-5275	32	34	0.165049	8.4403e-06	0.398754	0.084947	0.00205878
cg05464378	rs60857224:112312844:A:C	-4273	32	34	0.165049	8.4403e-06	0.398754	0.084947	0.00205878
cg05464378	rs1832687:112313537:A:C	-3580	32	34	0.165049	8.4403e-06	0.398754	0.084947	0.00205878
cg05464378	rs11195179:112314191:A:G	-2926	32	34	0.165049	8.36835e-06	0.39886	0.084931	0.00204567
cg05464378	rs11195180:112314403:G:A	-2714	32	34	0.165049	8.33039e-06	0.399035	0.0849477	0.00203895
cg05464378	rs11195181:112315491:G:C	-1626	32	35	0.169903	5.74872e-06	0.388644	0.081148	0.0015524
cg05464378	rs11195182:112316937:C:T	-180	32	34	0.165049	8.2977e-06	0.398964	0.0849148	0.00203361
cg05464378	rs7090886	-161	33	36	0.174757	1.18643e-05	0.374426	0.0812407	0.00265328
cg05464378	rs73350919:112317095:C:T	-22	32	34	0.165049	8.2977e-06	0.398964	0.0849148	0.00203361
cg05464378	rs79475758:112317144:G:A	27	32	34	0.165049	8.36835e-06	0.39886	0.084931	0.00204567
cg05464378	rs11195183:112318380:C:T	1263	30	31	0.150485	9.41256e-05	0.381332	0.0937365	0.0120977
cg24488739	rs9651417:112428879:C:T	-2841	76	100	0.485437	0.000623489	0.192985	0.0546407	0.0461252
cg24488739	rs11195260:112429050:G:A	-2670	71	93	0.451456	0.000414128	0.194763	0.0533272	0.0349159
cg24488739	rs9651418	-2656	76	100	0.485437	0.000618279	0.193067	0.0546252	0.0458737
cg24488739	rs12359907	-400	63	78	0.378641	0.000671912	0.195705	0.0557627	0.0485111
cg24488739	rs12355456:112431454:T:A	-266	63	78	0.378641	0.000645768	0.196707	0.0558598	0.0472056
cg11757130	rs10885009:112428360:G:A	-5684	63	78	0.378641	0.000144299	0.202518	0.0512564	0.0164675
cg11757130	rs12359907	-2724	63	78	0.378641	0.00012614	0.203503	0.0510268	0.014957
cg11757130	rs12355456:112431454:T:A	-2590	63	78	0.378641	0.000115946	0.204952	0.0510941	0.0140629
cg11757130	rs12220209:112433834:C:T	-210	66	80	0.38835	0.000114354	0.211514	0.0526803	0.0139175
cg02747823	rs11592563:112440402:C:T	-4451	33	36	0.174757	1.79021e-05	-0.282581	0.0627322	0.00358503
cg02747823	rs4918556:112441375:G:A	-3478	33	36	0.174757	1.77264e-05	-0.28265	0.0627125	0.00355837
cg02747823	rs7922352:112441927:G:C	-2926	32	35	0.169903	4.15931e-05	-0.27256	0.0635893	0.00667052
cg02747823	rs7070646:112443264:C:T	-1589	33	36	0.174757	1.77215e-05	-0.282495	0.0626772	0.00355752
cg02747823	rs139372166:112444510:AC:A	-343	33	36	0.174757	1.76166e-05	-0.282541	0.0626662	0.00354296
cg02747823	rs1557028:112444515:A:T	-338	33	36	0.174757	1.76166e-05	-0.282541	0.0626662	0.00354296
cg02747823	rs7909243:112446196:G:A	1343	74	94	0.456311	8.28972e-06	-0.230836	0.0491282	0.00203204
cg02747823	rs1974330:112446562:T:C	1709	44	51	0.247573	7.14942e-06	-0.256664	0.0542008	0.00182325
cg02747823	rs12219938:112448489:T:C	3636	35	38	0.184466	7.31882e-06	-0.291227	0.0615752	0.00185304
cg02747823	rs12218901:112448670:G:A	3817	35	38	0.184466	7.31882e-06	-0.291227	0.0615752	0.00185304
cg02747823	rs140643026:112448753:AT:A	3900	35	38	0.184466	7.31882e-06	-0.291227	0.0615752	0.00185304
cg02747823	rs73355054:112448907:C:T	4054	35	38	0.184466	7.31882e-06	-0.291227	0.0615752	0.00185304
cg02747823	rs11195264:112449009:G:A	4156	32	35	0.169903	4.84616e-06	-0.300646	0.0622288	0.00136772
cg02747823	rs141088267:112449401:AGTTT:A	4548	32	35	0.169903	4.80387e-06	-0.30079	0.0622308	0.00135868
cg02747823	rs11815350	4588	34	37	0.179612	1.10345e-05	-0.286785	0.0619796	0.00251741
cg02747823	rs4918560:112450681:C:T	5828	33	36	0.174757	3.67755e-06	-0.302561	0.0617634	0.00112316
cg02747823	rs75609889:112452637:A:G	7784	32	35	0.169903	4.76042e-06	-0.30102	0.0622497	0.00135013
cg02747823	rs56682080:112452640:A:ATGTTAGCT	7787	32	35	0.169903	4.76042e-06	-0.30102	0.0622497	0.00135013
cg02747823	rs11195265:112453284:G:A	8431	32	35	0.169903	4.759e-06	-0.301055	0.0622561	0.00135013
cg02747823	rs10885018:112453501:T:G	8648	74	94	0.456311	8.78816e-06	-0.230318	0.0491703	0.00211974
cg02747823	rs11195266:112453917:G:A	9064	32	35	0.169903	4.7134e-06	-0.301208	0.0622574	0.00134042
cg02747823	rs10597624:112454460:CCA:C	9607	32	35	0.169903	4.71238e-06	-0.301242	0.0622637	0.00134026
cg14157052	rs12782675	-797	51	55	0.26699	0.000697978	0.15538	0.044417	0.0497933
cg12192635	rs2181407:112534809:T:G	531	50	64	0.31068	0.000330882	0.091059	0.0244971	0.0297738
cg12192635	rs7090412:112535345:G:C	1067	50	64	0.31068	0.000329673	0.0911698	0.0245199	0.0296938
cg12192635	rs10885044:112536946:G:A	2668	50	64	0.31068	0.000318192	0.0916901	0.0245925	0.0289568
cg18098054	rs2419583:112578066:C:A	633	74	100	0.485437	0.000268264	-0.118039	0.0312508	0.0256826
cg18098054	rs4918599:112584308:C:T	6875	69	91	0.441748	0.000658102	-0.11007	0.0313072	0.0478159
cg18098054	rs4918600	7018	73	98	0.475728	0.000424865	-0.112718	0.0309259	0.0355634
cg18098054	rs11370585:112584803:C:CT	7370	76	102	0.495146	0.000682412	-0.111419	0.0317888	0.0490319
cg18098054	rs726804:112585796:G:A	8363	74	102	0.495146	0.000247234	-0.115652	0.0304319	0.0242217
cg18098054	rs726803	8663	73	98	0.475728	0.000485123	-0.111657	0.030964	0.0389738
cg18098054	rs10736209:112586513:G:T	9080	71	95	0.461165	0.000541881	-0.111357	0.0311623	0.0420103
cg15053404	rs7913363:112617664:C:T	-227	17	17	0.0825243	0.000506302	-0.242344	0.0674404	0.0401082
cg05250818	rs1591469:112983463:A:G	-9842	53	65	0.315534	0.000301448	0.113562	0.0303329	0.0279068
cg05250818	rs4581381:112984813:G:T	-8492	69	91	0.441748	0.000290687	0.106584	0.0283903	0.027205
cg05250818	rs1832112	-7266	72	96	0.466019	3.71914e-05	0.120239	0.0278615	0.00615045
cg05250818	rs4279941:112989599:C:A	-3706	60	76	0.368932	0.000355956	0.107798	0.0291653	0.0313666
cg05250818	rs11195480:112990204:A:G	-3101	64	80	0.38835	0.000205303	0.114075	0.0296085	0.021221
cg05250818	rs1360863:112992418:C:A	-887	59	75	0.364078	0.000166289	0.113085	0.0289093	0.0182336
cg05250818	rs7907114:112993152:A:G	-153	69	90	0.436893	1.00005e-06	0.142242	0.0272999	0.000437451
cg05250818	rs12780725:112993377:C:T	72	60	76	0.368932	0.000325396	0.108767	0.0292231	0.0294234
cg05250818	rs35981791:112994132:GA:G	827	59	75	0.364078	0.000166289	0.113085	0.0289093	0.0182336
cg05250818	rs1335714:112994252:C:T	947	72	98	0.475728	1.66069e-06	0.135236	0.0265681	0.000632263
cg05250818	rs17775850:112994448:C:A	1143	60	76	0.368932	0.000325396	0.108767	0.0292231	0.0294234
cg05250818	rs71489943:112994787:G:GA	1482	65	85	0.412621	7.61498e-06	0.129561	0.0274507	0.00190523
cg05250818	rs4317914:112995886:G:A	2581	49	61	0.296117	0.000220446	0.114986	0.0300008	0.0223439
cg05250818	rs755316:112996265:G:C	2960	65	85	0.412621	7.61498e-06	0.129561	0.0274507	0.00190523
cg05250818	rs2256511:112996845:T:C	3540	71	94	0.456311	8.03816e-07	0.142002	0.026988	0.000373336
cg05250818	rs5787886:112997290:A:AG	3985	49	61	0.296117	0.000238863	0.114151	0.0299603	0.0236521
cg05250818	rs34299378:112998212:TC:T	4907	62	80	0.38835	1.3879e-05	0.126957	0.0277851	0.00297958
cg05250818	rs11195482:112998351:G:C	5046	48	60	0.291262	0.000112324	0.119379	0.0296965	0.0137312
cg05250818	rs11195483:112998370:C:T	5065	48	60	0.291262	0.000112324	0.119379	0.0296965	0.0137312
cg05250818	rs7902225:112998961:C:T	5656	61	79	0.383495	6.33268e-06	0.130761	0.0274394	0.00166728
cg05250818	rs4345895:112999860:G:A	6555	69	90	0.436893	1.16004e-06	0.141058	0.0272557	0.000485319
cg05250818	rs7476362:113000317:A:G	7012	58	74	0.359223	7.21719e-05	0.117906	0.0284809	0.00999793
cg05250818	rs11817539:113001595:T:A	8290	66	86	0.417476	1.2564e-06	0.139478	0.0270491	0.000514505
cg05250818	rs182631402:113001699:C:A	8394	60	78	0.378641	9.67523e-06	0.1281	0.027489	0.00228062
cg05250818	10:113002255:T:TTA	8950	49	61	0.296117	6.37791e-05	0.123638	0.0296285	0.00914372
cg05250818	rs375021986:113002275:A:T	8970	47	58	0.281553	0.000546888	0.109875	0.0307709	0.0422693
cg05250818	rs369087323:113002276:T:G	8971	47	58	0.281553	0.000546888	0.109875	0.0307709	0.0422693
cg05250818	rs370209359:113002323:TATATA:T	9018	46	57	0.276699	0.000243112	0.11608	0.0305064	0.023948
cg05250818	rs4480464:113002546:C:T	9241	63	82	0.398058	7.67192e-06	0.129299	0.027406	0.00191601
cg05250818	rs200797217:113002652:TTA:T	9347	48	60	0.291262	0.000114101	0.1193	0.0297086	0.0138936
cg05250818	rs4525161:113002722:T:C	9417	63	82	0.398058	7.67156e-06	0.129294	0.027405	0.00191601
cg05250818	rs12569485:113002963:A:G	9658	48	60	0.291262	0.000112703	0.119383	0.0297043	0.0137645
cg05250818	rs12571767:113003262:C:T	9957	50	63	0.305825	0.000158275	0.115281	0.0293676	0.0175947
cg19778971	rs1914110:113258647:A:T	-9185	59	77	0.373786	0.000409537	-0.11832	0.032368	0.0346423
cg19778971	rs7477504:113259144:T:C	-8688	62	81	0.393204	0.000520308	-0.116454	0.0324798	0.0408621
cg19778971	rs1914108:113263393:C:T	-4439	59	77	0.373786	0.000398169	-0.118633	0.0323812	0.0339412
cg19778971	rs1914107:113263600:C:T	-4232	59	77	0.373786	0.000394461	-0.118737	0.0323855	0.033718
cg19778971	rs11195611:113264012:C:T	-3820	59	77	0.373786	0.000391982	-0.118784	0.0323821	0.0335673
cg19778971	rs11195612:113264540:A:G	-3292	59	77	0.373786	0.000390793	-0.11884	0.0323897	0.0334917
cg19778971	rs1914106:113265762:T:C	-2070	63	82	0.398058	0.000691798	-0.114778	0.0327855	0.0495093
cg19778971	rs1914103:113266785:T:C	-1047	63	82	0.398058	0.000685792	-0.114878	0.0327897	0.0492098
cg19778971	rs5787914:113272442:TGA:T	4610	60	76	0.368932	0.000463672	-0.121709	0.0336281	0.0377759
cg19778971	rs11195615:113272851:G:A	5019	60	76	0.368932	0.000459396	-0.121815	0.0336322	0.0375287
cg19778971	rs4918663:113274580:A:G	6748	63	82	0.398058	0.000591916	-0.116556	0.0328575	0.0445948
cg19778971	rs1878237:113276517:A:G	8685	62	81	0.393204	0.000374143	-0.120096	0.0326198	0.0324782
cg25040937	rs61437665:113474927:A:C	-9631	35	36	0.174757	3.59587e-05	0.233755	0.0540548	0.00600249
cg25040937	rs11195688:113475185:T:C	-9373	35	36	0.174757	3.59587e-05	0.233755	0.0540548	0.00600249
cg25040937	rs140463018:113475247:A:ACAT	-9311	37	38	0.184466	7.9812e-05	0.225267	0.0547727	0.0107254
cg25040937	rs7898831:113475426:A:C	-9132	35	36	0.174757	3.65941e-05	0.235895	0.0546074	0.00607947
cg25040937	rs10885247:113475567:G:C	-8991	35	36	0.174757	3.65775e-05	0.235688	0.0545581	0.00607728
cg25040937	rs12251378:113476059:T:C	-8499	35	36	0.174757	3.65241e-05	0.235718	0.0545603	0.00607009
cg25040937	rs9633723:113476605:C:T	-7953	29	29	0.140777	0.00030521	0.230159	0.0615347	0.0281533
cg25040937	rs10787391:113479012:C:T	-5546	35	36	0.174757	3.64262e-05	0.235773	0.0545641	0.0060579
cg25040937	rs11195693:113479270:C:T	-5288	35	36	0.174757	3.64262e-05	0.235773	0.0545641	0.0060579
cg25040937	rs10787392:113480875:C:T	-3683	36	37	0.179612	0.00013997	0.216048	0.0545647	0.0161139
cg25040937	rs61871353:113481633:C:T	-2925	37	38	0.184466	7.71514e-05	0.223716	0.0542751	0.0104817
cg25040937	rs61871354:113481674:C:T	-2884	37	38	0.184466	7.71514e-05	0.223716	0.0542751	0.0104817
cg25040937	rs58291652:113482438:G:C	-2120	35	36	0.174757	3.56216e-05	0.233898	0.0540571	0.00596287
cg25040937	rs10787394:113483641:G:C	-917	35	36	0.174757	3.72925e-05	0.233023	0.0540046	0.00616231
cg25040937	rs10787395:113483668:T:G	-890	37	38	0.184466	8.08146e-05	0.222819	0.0542219	0.0108204
cg25040937	rs10787396:113483669:T:C	-889	37	38	0.184466	8.08146e-05	0.222819	0.0542219	0.0108204
cg25040937	rs10885251:113484032:G:T	-526	37	38	0.184466	7.85591e-05	0.222868	0.0541333	0.010612
cg25040937	rs28601581:113484613:C:T	55	36	37	0.179612	3.87822e-05	0.231421	0.053761	0.00633855
cg25040937	rs884500:113484797:A:C	239	40	41	0.199029	7.05722e-05	0.221202	0.053355	0.00984162
cg25040937	rs868258	323	38	39	0.18932	3.12018e-05	0.230944	0.0529516	0.00541465
cg25040937	rs4506564:113484997:G:T	439	27	28	0.135922	0.000651763	0.209985	0.0596769	0.0475183
cg25040937	rs11195695:113485525:T:C	967	38	39	0.18932	3.19621e-05	0.232635	0.0534161	0.00551209
cg25040937	rs1414884:113486237:G:C	1679	35	36	0.174757	3.6855e-05	0.234993	0.054422	0.00610992
cg25040937	rs10787398:113486841:C:T	2283	35	36	0.174757	3.62261e-05	0.235383	0.0544556	0.00603367
cg25040937	rs10787399:113486954:T:A	2396	38	39	0.18932	3.15401e-05	0.233134	0.053488	0.00545808
cg25040937	rs1361140:113487199:G:T	2641	37	38	0.184466	5.43675e-05	0.228525	0.0542109	0.00813216
cg25040937	rs1336417:113487681:G:C	3123	32	32	0.15534	0.000326345	0.222139	0.0596971	0.029484
cg25040937	rs1336418:113488023:C:T	3465	32	32	0.15534	0.000327501	0.22206	0.059692	0.0295571
cg25040937	rs1336419:113488030:C:A	3472	32	32	0.15534	0.000327501	0.22206	0.059692	0.0295571
cg25040937	rs11195696:113488870:C:T	4312	32	32	0.15534	0.000327501	0.22206	0.059692	0.0295571
cg25040937	rs11195697:113488933:G:T	4375	32	32	0.15534	0.000327501	0.22206	0.059692	0.0295571
cg25040937	rs10509948:113489049:C:A	4491	29	29	0.140777	0.000330278	0.228683	0.0615125	0.0297341
cg25040937	rs11195698:113489179:T:C	4621	32	32	0.15534	0.000329059	0.222057	0.0597131	0.0296572
cg25040937	rs5787937:113489206:TAAA:T	4648	32	32	0.15534	0.000329059	0.222057	0.0597131	0.0296572
cg25040937	rs10885252:113489961:T:G	5403	28	29	0.140777	0.000341182	0.222144	0.0599044	0.0304441
cg25040937	rs12260795:113494493:G:A	9935	29	29	0.140777	0.00033246	0.229131	0.0616645	0.0298798
cg10566684	rs34311824:113513050:GT:G	-3475	58	72	0.349515	0.000184313	0.178135	0.0458754	0.019637
cg10566684	rs1337993:113514495:C:G	-2030	62	78	0.378641	0.000657537	0.16071	0.0457075	0.0477884
cg10566684	rs1337994:113515353:A:T	-1172	58	72	0.349515	0.000182228	0.177713	0.0457292	0.0194707
cg10566684	rs10509950	-31	59	73	0.354369	0.00014592	0.180716	0.0457743	0.0166045
cg10566684	rs10509951:113516620:G:T	95	55	68	0.330097	0.000581457	0.164998	0.0464442	0.0440553
cg10566684	rs11195715	3099	71	91	0.441748	0.000484232	-0.164719	0.0456723	0.0389187
cg10566684	rs7897659:113525516:T:A	8991	59	78	0.378641	3.04276e-05	0.18344	0.0419968	0.00531012
cg10566684	rs10885261:113525550:G:C	9025	54	71	0.34466	3.1685e-05	0.184874	0.0424274	0.00547731
cg10566684	rs10787405	9435	59	78	0.378641	2.50553e-05	0.185031	0.0418786	0.0045915
cg24233194	rs11195715	-7217	71	91	0.441748	1.04324e-06	0.199281	0.0383204	0.000449722
cg24233194	rs58985480:113524212:T:C	-2629	70	97	0.470874	9.8987e-05	0.149459	0.036863	0.0125387
cg24233194	rs10749098:113528173:G:A	1332	55	71	0.34466	0.000543666	-0.140124	0.0392232	0.0421066
cg24233194	rs1415852	5176	55	72	0.349515	0.000695564	-0.135941	0.0388485	0.0496833
cg18973024	rs10787426:113728434:T:C	-3545	66	79	0.383495	0.000109962	-0.259443	0.0644455	0.0135245
cg18973024	rs10885303:113729933:T:G	-2046	66	80	0.38835	2.53779e-05	-0.276161	0.062551	0.00463651
cg18973024	rs4918708:113733313:A:G	1334	66	78	0.378641	7.14082e-05	-0.269808	0.0651287	0.00992266
cg15710130	rs3824627:113908060:T:C	8896	66	84	0.407767	5.32501e-05	-0.208237	0.0493336	0.00800996
cg06104546	rs10430630:114060153:T:C	-7649	15	15	0.0728155	0.000419183	-0.307595	0.0843028	0.0352203
cg06104546	rs78476354:114068898:G:A	1096	15	15	0.0728155	0.000409945	-0.307129	0.0840256	0.0346639
cg10835128	rs7097428	-3528	70	91	0.441748	0.000610168	0.211544	0.0597868	0.0454823
cg13312968	rs10885334:114110438:T:C	660	61	79	0.383495	0.000456211	0.181043	0.0499567	0.0373414
cg13312968	rs10885335:114110439:T:G	661	61	79	0.383495	0.000456211	0.181043	0.0499567	0.0373414
cg13312968	rs11195917:114110893:G:A	1115	61	79	0.383495	0.000503571	0.179038	0.0498014	0.0399576
cg13312968	10:114112179:C:<CN0>:0	2401	61	79	0.383495	0.000536936	0.177577	0.0496559	0.0417492
cg13312968	rs201687876:114116658:C:CA	6880	61	79	0.383495	0.000528786	0.177653	0.0496145	0.0413087
cg13312968	rs768102:114116826:T:C	7048	61	79	0.383495	0.000527969	0.177666	0.0496117	0.0412664
cg13312968	rs11195922:114118682:C:T	8904	61	79	0.383495	0.000505728	0.177954	0.049517	0.0400756
cg13312968	rs10885338:114119160:A:G	9382	61	79	0.383495	0.000500408	0.178027	0.0494946	0.0397887
cg13312968	rs11195926:114119180:C:T	9402	61	79	0.383495	0.000500864	0.177942	0.0494747	0.0398137
cg01378456	rs10885334:114110438:T:C	-6268	61	79	0.383495	0.000236691	0.162258	0.0425575	0.0235026
cg01378456	rs10885335:114110439:T:G	-6267	61	79	0.383495	0.000236691	0.162258	0.0425575	0.0235026
cg01378456	rs11195917:114110893:G:A	-5813	61	79	0.383495	0.000247501	0.161137	0.0424041	0.0242384
cg01378456	10:114112179:C:<CN0>:0	-4527	61	79	0.383495	0.000258854	0.1601	0.0422727	0.0250376
cg01378456	rs201687876:114116658:C:CA	-48	61	79	0.383495	0.000259149	0.159977	0.042244	0.0250563
cg01378456	rs768102:114116826:T:C	120	61	79	0.383495	0.000259644	0.15995	0.0422429	0.0250893
cg01378456	rs11195922:114118682:C:T	1976	61	79	0.383495	0.000264509	0.159514	0.0421864	0.0254262
cg01378456	rs10885338:114119160:A:G	2454	61	79	0.383495	0.000264564	0.159455	0.0421716	0.0254301
cg01378456	rs11195926:114119180:C:T	2474	61	79	0.383495	0.000269694	0.159188	0.0421618	0.0257714
cg01378456	rs1926565	3984	61	79	0.383495	0.000273015	0.158892	0.0421224	0.0260026
cg18733757	rs11598531:114128629:C:T	-6250	35	37	0.179612	7.96394e-05	0.177071	0.0430479	0.0107089
cg18733757	rs61872333:114130040:G:A	-4839	35	37	0.179612	7.95247e-05	0.177126	0.0430572	0.010697
cg07252394	rs2277208:114136349:G:C	-7679	76	99	0.480583	5.22064e-11	0.507602	0.0690366	3.62759e-07
cg07252394	rs59242079:114138243:T:G	-5785	76	99	0.480583	5.24597e-11	0.506744	0.0689292	3.64285e-07
cg07252394	rs11195936:114138672:G:A	-5356	66	83	0.402913	4.38913e-09	0.469596	0.0730911	8.52776e-06
cg07252394	rs9787487:114139014:C:T	-5014	76	99	0.480583	5.21331e-11	0.506705	0.0689119	3.626e-07
cg07252394	rs11195937:114141245:T:G	-2783	52	57	0.276699	2.57642e-06	-0.453766	0.091028	0.000868335
cg07252394	rs11195938:114142060:T:C	-1968	76	99	0.480583	5.22998e-11	0.506358	0.0688708	3.63291e-07
cg07252394	rs17129748	-1629	76	99	0.480583	5.198e-11	0.506317	0.0688535	3.61652e-07
cg07252394	rs7075592:114142807:G:A	-1221	76	99	0.480583	5.47611e-11	0.506587	0.0689905	3.74915e-07
cg07252394	rs11813362:114143839:G:T	-189	76	99	0.480583	5.47611e-11	0.506587	0.0689905	3.74915e-07
cg07252394	rs76989317:114144062:GTT:G	34	76	99	0.480583	7.82877e-11	0.504702	0.0694284	4.8396e-07
cg07252394	rs58854276:114145044:A:G	1016	55	70	0.339806	8.50717e-05	0.316935	0.0773857	0.0112378
cg07252394	rs12218402:114146217:G:T	2189	76	99	0.480583	5.47611e-11	0.506587	0.0689905	3.74915e-07
cg07252394	rs4918744:114146502:T:G	2474	54	59	0.286408	3.55842e-06	-0.44924	0.0915561	0.00109618
cg07252394	rs4918745:114146503:T:C	2475	54	59	0.286408	3.55842e-06	-0.44924	0.0915561	0.00109618
cg07252394	rs11195940:114147034:T:C	3006	76	99	0.480583	5.47611e-11	0.506587	0.0689905	3.74915e-07
cg07252394	rs12255316:114148689:C:T	4661	76	99	0.480583	5.47611e-11	0.506587	0.0689905	3.74915e-07
cg07252394	rs10885342:114149305:T:C	5277	76	99	0.480583	5.47611e-11	0.506587	0.0689905	3.74915e-07
cg07252394	rs10749118:114149479:C:A	5451	75	96	0.466019	9.77729e-11	0.507946	0.0703177	5.51176e-07
cg07252394	rs147449364:114149860:AAG:A	5832	76	99	0.480583	5.47611e-11	0.506587	0.0689905	3.74915e-07
cg07252394	rs7077060:114151662:T:C	7634	72	94	0.456311	3.9253e-09	0.453129	0.0702663	7.97121e-06
cg07252394	rs7077197:114151757:T:C	7729	72	94	0.456311	3.9253e-09	0.453129	0.0702663	7.97121e-06
cg07252394	rs11591311:114152227:C:T	8199	72	94	0.456311	3.20131e-09	0.45512	0.0701012	6.92964e-06
cg07252394	rs11312208:114153809:GC:G	9781	74	97	0.470874	1.57126e-08	0.439249	0.0714331	2.09207e-05
cg17025708	rs10715903:114578567:CA:C	7767	76	99	0.480583	0.000450957	-0.11886	0.0327672	0.0370602
cg17025708	rs2479124	8194	78	101	0.490291	0.000304898	-0.124166	0.0331941	0.028132
cg00066151	rs7078407	1861	45	57	0.276699	1.50925e-07	-0.386274	0.0684067	0.000108673
cg00066151	rs36064961:114574627:A:C	3447	45	57	0.276699	2.02228e-07	-0.384186	0.0688467	0.000134758
cg16261498	rs61875062:114663010:G:A	-9461	50	64	0.31068	5.3232e-07	-0.281412	0.0525238	0.000273913
cg16261498	rs11196147:114665766:G:A	-6705	48	61	0.296117	3.70864e-05	-0.233583	0.0541161	0.00613772
cg16261498	rs1813335:114667350:T:C	-5121	55	71	0.34466	5.68709e-07	-0.268744	0.0503036	0.000287444
cg16261498	rs72826024:114667547:T:C	-4924	51	66	0.320388	5.22129e-07	-0.270919	0.0505229	0.000270172
cg16261498	rs11592269:114667684:G:A	-4787	51	66	0.320388	5.18208e-07	-0.270984	0.0505186	0.000268881
cg16261498	rs11592285:114667816:G:A	-4655	55	71	0.34466	5.61515e-07	-0.268864	0.0502983	0.00028498
cg16261498	rs58046881:114669974:A:T	-2497	51	66	0.320388	4.91306e-07	-0.271339	0.0504684	0.000259068
cg16261498	rs58708176:114670411:A:G	-2060	51	66	0.320388	4.84762e-07	-0.271382	0.0504473	0.000256482
cg16261498	rs7076475	-1632	56	71	0.34466	2.96102e-07	-0.279391	0.0508615	0.000179137
cg16261498	rs17130145:114670902:C:A	-1569	53	68	0.330097	5.31414e-08	-0.294762	0.0501223	5.09251e-05
cg16261498	rs61875068:114671327:A:T	-1144	50	64	0.31068	1.67417e-05	-0.24295	0.0537305	0.00341047
cg16261498	rs17130147:114671531:T:G	-940	54	69	0.334951	7.78642e-08	-0.291598	0.0503131	6.6532e-05
cg16261498	rs141866258:114671756:CCTTT:C	-715	50	64	0.31068	1.71931e-05	-0.243456	0.0539231	0.0034775
cg16261498	rs59545071:114672330:T:C	-141	54	69	0.334951	8.80107e-08	-0.293347	0.0508555	7.25213e-05
cg16261498	rs12243341:114680154:A:G	7683	48	57	0.276699	0.000585607	-0.213123	0.0600261	0.0442833
cg08070419	rs12569673:115203474:G:T	2357	31	34	0.165049	0.000497097	-0.169515	0.0471027	0.0396135
cg08070419	rs61865257:115207259:G:A	6142	29	32	0.15534	0.000492594	-0.171809	0.0477047	0.0393731
cg12250953	rs56068828:115226862:A:G	-8645	47	57	0.276699	1.26287e-05	-0.385582	0.0839479	0.00278032
cg12250953	rs4503459:115227419:G:A	-8088	47	57	0.276699	1.26532e-05	-0.38567	0.083976	0.00278415
cg12250953	rs11196344:115234145:G:A	-1362	48	58	0.281553	2.0755e-05	-0.377262	0.0844606	0.00400231
cg12250953	rs10885464:115234180:A:G	-1327	49	60	0.291262	3.80253e-06	-0.398964	0.0815781	0.00114977
cg12250953	rs17769979	149	49	60	0.291262	3.80253e-06	-0.398964	0.0815781	0.00114977
cg12250953	rs28450367:115237194:G:A	1687	48	58	0.281553	6.67175e-06	-0.39716	0.0835678	0.00173126
cg12250953	rs2277262:115241311:C:G	5804	47	57	0.276699	1.26532e-05	-0.38567	0.083976	0.00278415
cg12250953	rs3834422:115242586:CA:C	7079	51	63	0.305825	1.91822e-05	-0.366366	0.0816523	0.00377069
cg12250953	rs11196346:115243748:C:T	8241	48	58	0.281553	6.80846e-06	-0.396845	0.0835899	0.00175856
cg12250953	rs12253959:115244596:G:A	9089	47	57	0.276699	1.26532e-05	-0.38567	0.083976	0.00278415
cg12250953	rs11196347:115245330:C:T	9823	71	93	0.451456	0.00024249	-0.304377	0.0799764	0.0239047
cg09746470	rs3862015	5472	62	88	0.427184	0.000674521	0.180383	0.0514138	0.0486412
cg08165016	rs11196371:115309928:C:A	-8214	55	71	0.34466	0.000169311	0.148576	0.038031	0.0184573
cg08165016	rs2000278:115310098:C:A	-8044	55	71	0.34466	0.000161201	0.149042	0.0380173	0.0178392
cg08165016	rs2240879:115312811:T:C	-5331	54	69	0.334951	0.000210256	0.148145	0.0385182	0.0215888
cg08165016	rs3837349:115313875:CAT:C	-4267	59	77	0.373786	0.000132452	0.148652	0.0373995	0.0154945
cg08165016	rs3781390:115314118:G:A	-4024	59	77	0.373786	0.000134913	0.148532	0.037417	0.0156975
cg08165016	rs10509980:115314498:A:C	-3644	59	77	0.373786	0.000137616	0.148384	0.0374313	0.0159153
cg08165016	rs3781388:115317032:G:A	-1110	59	76	0.368932	0.000187421	0.146315	0.0377261	0.0198878
cg08165016	rs3781386:115318021:C:G	-121	61	82	0.398058	0.00030599	-0.135788	0.036311	0.0281987
cg08165016	rs3862015	4704	62	88	0.427184	0.000461026	0.125104	0.0345501	0.0376279
cg08165016	rs3862016:115322922:C:T	4780	62	87	0.42233	0.000423457	0.127319	0.0349227	0.0354829
cg02578664	rs3740532:115333694:A:G	7779	36	39	0.18932	0.000494994	-0.13237	0.0367685	0.0395096
cg17798590	rs3781385:115318368:A:G	-8827	52	67	0.325243	0.000102714	-0.0898612	0.0222188	0.012875
cg17798590	rs3781384:115318420:A:G	-8775	52	67	0.325243	0.000102714	-0.0898612	0.0222188	0.012875
cg17798590	rs4917657:115318547:A:G	-8648	52	67	0.325243	0.000102827	-0.089857	0.0222194	0.0128835
cg17798590	rs3781383:115319489:A:T	-7706	52	67	0.325243	0.000103721	-0.0898308	0.0222259	0.012968
cg17798590	rs4918843:115319681:T:C	-7514	53	68	0.330097	0.000175313	-0.08728	0.0223967	0.0189348
cg17798590	rs4918844	-7484	53	68	0.330097	0.000175313	-0.08728	0.0223967	0.0189348
cg17798590	rs10787490:115319988:G:A	-7207	53	68	0.330097	0.000171526	-0.087387	0.0223892	0.0186343
cg17798590	rs4918852	623	51	63	0.305825	1.38061e-05	0.104618	0.0228894	0.00296819
cg19080846	rs11196402:115401813:T:C	-8439	50	59	0.286408	0.000480047	-0.159891	0.0443022	0.0386836
cg19080846	rs12769107:115405289:G:A	-4963	50	59	0.286408	0.000480965	-0.159895	0.0443102	0.0387336
cg19080846	rs2419856:115409468:A:T	-784	50	59	0.286408	0.000490572	-0.159623	0.0443062	0.0392685
cg19080846	rs2185913:115410234:T:C	-18	42	50	0.242718	4.22246e-05	-0.190098	0.0443916	0.00674303
cg19080846	rs12775876	4659	52	61	0.296117	0.000603201	-0.156954	0.0443157	0.0451629
cg09337709	rs41310308:115413901:T:C	-9857	55	69	0.334951	0.000319721	0.131293	0.0352275	0.029056
cg09337709	rs6585238:115414150:G:A	-9608	55	69	0.334951	0.000319721	0.131293	0.0352275	0.029056
cg09337709	rs7906050:115414538:T:C	-9220	55	69	0.334951	0.000319721	0.131293	0.0352275	0.029056
cg09337709	rs1419096:115414840:A:C	-8918	55	69	0.334951	0.000319721	0.131293	0.0352275	0.029056
cg09337709	rs10749140:115415264:G:A	-8494	55	69	0.334951	0.000319721	0.131293	0.0352275	0.029056
cg09337709	rs10787494:115415553:C:T	-8205	55	69	0.334951	0.000319721	0.131293	0.0352275	0.029056
cg09337709	rs149016003:115415803:TCTCATTATACCCGC:T	-7955	55	69	0.334951	0.000359279	0.129959	0.0351867	0.0315704
cg09337709	rs57360870:115415989:C:CT	-7769	55	69	0.334951	0.000319721	0.131293	0.0352275	0.029056
cg09337709	rs10885486:115416318:T:C	-7440	54	67	0.325243	0.000319221	0.133256	0.03575	0.0290232
cg09337709	rs7895182:115416334:G:A	-7424	55	69	0.334951	0.000328255	0.131176	0.0352679	0.0296041
cg09337709	rs7914877:115416457:T:C	-7301	55	70	0.339806	0.000461121	0.125959	0.0347868	0.0376334
cg09337709	rs10885487:115416760:C:T	-6998	55	70	0.339806	0.000461121	0.125959	0.0347868	0.0376334
cg09337709	rs10885488:115416819:T:C	-6939	55	70	0.339806	0.000461121	0.125959	0.0347868	0.0376334
cg24846397	rs7893388:115428290:C:A	-9866	44	51	0.247573	0.000618747	-0.202029	0.0571645	0.0458932
cg24846397	rs72835675:115428291:T:C	-9865	26	28	0.135922	0.00048401	0.266777	0.0739675	0.0389094
cg24846397	rs3121493:115429032:G:A	-9124	61	74	0.359223	1.6268e-07	0.275699	0.0489719	0.000115212
cg24846397	rs3121494:115429124:A:C	-9032	66	79	0.383495	1.02794e-07	0.28793	0.0502198	8.12659e-05
cg24846397	rs11816040:115429146:C:T	-9010	44	51	0.247573	0.000618747	-0.202029	0.0571645	0.0458932
cg24846397	rs1112572:115430250:A:G	-7906	41	46	0.223301	9.25051e-05	-0.242077	0.0594369	0.011944
cg24846397	rs10885493:115430933:G:A	-7223	26	28	0.135922	0.000482913	0.266657	0.0739207	0.0388479
cg24846397	rs7906704	-6916	41	48	0.23301	0.000367597	-0.209993	0.0569583	0.032083
cg24846397	rs149970219:115434855:T:C	-3301	61	73	0.354369	1.38979e-07	-0.278664	0.0491871	0.000102041
cg24846397	rs141095982:115435278:C:T	-2878	26	28	0.135922	0.00048401	0.266777	0.0739675	0.0389094
cg24846397	rs148728767:115436118:C:A	-2038	41	47	0.228155	0.000162669	-0.227933	0.0581781	0.0179593
cg24846397	rs7918733:115439394:C:T	1238	61	77	0.373786	0.000394409	-0.183644	0.0500884	0.0337148
cg24846397	rs10553596:115439640:CTT:C	1484	42	45	0.218447	0.000102424	-0.257026	0.0635393	0.012849
cg24846397	rs7922608:115439919:G:T	1763	62	74	0.359223	9.62552e-08	-0.28416	0.049435	7.71026e-05
cg24846397	rs7896105:115441360:A:G	3204	65	77	0.373786	5.49239e-07	-0.273726	0.0511587	0.000280476
cg24846397	rs7907519:115441683:A:C	3527	67	80	0.38835	3.81287e-06	-0.253464	0.051834	0.00115148
cg24846397	rs10885496:115442919:A:G	4763	67	80	0.38835	3.79864e-06	-0.253594	0.0518509	0.00114898
cg24846397	rs6585239:115443395:T:C	5239	68	81	0.393204	1.76239e-05	-0.238789	0.0529634	0.00354406
cg24846397	rs7902304:115444121:T:C	5965	68	81	0.393204	1.88194e-06	-0.262292	0.0518331	0.000693697
cg05272550	rs7893388:115428290:C:A	-9898	44	51	0.247573	0.000335509	-0.249595	0.0672195	0.0300727
cg05272550	rs3121493:115429032:G:A	-9156	61	74	0.359223	1.27724e-08	0.350036	0.0565102	1.80299e-05
cg05272550	rs3121494:115429124:A:C	-9064	66	79	0.383495	2.09212e-08	0.35597	0.0584851	2.57114e-05
cg05272550	rs11816040:115429146:C:T	-9042	44	51	0.247573	0.000335509	-0.249595	0.0672195	0.0300727
cg05272550	rs1112572:115430250:A:G	-7938	41	46	0.223301	0.000382179	-0.261803	0.0712284	0.0329549
cg05272550	rs7906704	-6948	41	48	0.23301	0.000366712	-0.248379	0.0673572	0.0320359
cg05272550	rs149970219:115434855:T:C	-3333	61	73	0.354369	1.3684e-08	-0.351489	0.0568825	1.89923e-05
cg05272550	rs148728767:115436118:C:A	-2070	41	47	0.228155	0.000282914	-0.260172	0.0691579	0.0266848
cg05272550	rs7918733:115439394:C:T	1206	61	77	0.373786	5.52013e-06	-0.273072	0.0568981	0.00150732
cg05272550	rs10553596:115439640:CTT:C	1452	42	45	0.218447	0.000226315	-0.289584	0.0757013	0.0227694
cg05272550	rs7922608:115439919:G:T	1731	62	74	0.359223	1.44518e-08	-0.354017	0.057402	1.9765e-05
cg05272550	rs7896105:115441360:A:G	3172	65	77	0.373786	2.52869e-07	-0.332042	0.0600512	0.000158735
cg05272550	rs7907519:115441683:A:C	3495	67	80	0.38835	1.04178e-06	-0.314869	0.0605434	0.000449218
cg05272550	rs10885496:115442919:A:G	4731	67	80	0.38835	1.0752e-06	-0.314627	0.0605836	0.000459668
cg05272550	rs6585239:115443395:T:C	5207	68	81	0.393204	3.25558e-06	-0.303764	0.0616363	0.00102913
cg05272550	rs7902304:115444121:T:C	5933	68	81	0.393204	1.06442e-06	-0.31675	0.0609644	0.000456289
cg04475085	rs11196425:115444419:A:G	5051	23	23	0.11165	0.000184878	-0.147134	0.0379	0.019683
cg08245930	rs1112572:115430250:A:G	-9383	41	46	0.223301	4.0975e-06	0.238528	0.0489553	0.00121163
cg08245930	rs7906704	-8393	41	48	0.23301	1.46277e-05	0.213566	0.0468763	0.00309722
cg08245930	rs148728767:115436118:C:A	-3515	41	47	0.228155	7.62589e-06	0.226287	0.0479483	0.00190739
cg23879831	rs10787496:115474564:T:A	-4337	55	65	0.315534	0.000687677	-0.127738	0.0364686	0.0493044
cg23879831	rs10787497:115474566:T:A	-4335	54	64	0.31068	0.000454306	-0.13152	0.036279	0.037243
cg16526673	rs3127078:115502717:G:A	-8002	23	26	0.126214	1.96149e-05	0.34536	0.0770686	0.00383461
cg16526673	rs3127079:115503970:C:A	-6749	23	26	0.126214	1.96355e-05	0.345171	0.077031	0.00383756
cg16526673	rs3124735	-5084	53	62	0.300971	9.60008e-07	0.301297	0.05772	0.000425458
cg16526673	rs3127080:115507322:G:A	-3397	23	26	0.126214	1.98111e-05	0.345189	0.0770744	0.00386314
cg16526673	rs3127081:115507484:G:A	-3235	53	62	0.300971	9.61675e-07	0.301558	0.0577746	0.000425934
cg16526673	rs3127082:115510667:C:G	-52	45	52	0.252427	1.47615e-07	0.334186	0.0591296	0.000106915
cg16526673	rs11196476:115514581:C:A	3862	23	26	0.126214	2.22052e-05	0.35448	0.0796695	0.00420707
cg22618337	rs12357379:115503839:C:T	-7090	26	26	0.126214	0.000545657	0.255909	0.0716551	0.0422057
cg22618337	rs12358981:115504052:T:C	-6877	23	23	0.11165	3.88469e-05	0.314555	0.0730812	0.0063466
cg22618337	rs11196462:115504473:T:C	-6456	27	27	0.131068	0.000463561	0.252375	0.0697297	0.0377684
cg22618337	rs74363802:115507737:TATC:T	-3192	27	27	0.131068	0.000463561	0.252375	0.0697297	0.0377684
cg22618337	rs11196465:115508126:T:A	-2803	27	27	0.131068	0.000463561	0.252375	0.0697297	0.0377684
cg22618337	rs4394799	-2547	27	27	0.131068	0.000463561	0.252375	0.0697297	0.0377684
cg22618337	rs6585242:115508771:T:G	-2158	27	27	0.131068	0.000459947	0.252609	0.0697503	0.0375633
cg22618337	rs7077150:115508834:T:C	-2095	27	27	0.131068	0.000455114	0.252893	0.0697692	0.0372789
cg22618337	rs11196466:115509081:A:G	-1848	27	27	0.131068	0.000455114	0.252893	0.0697692	0.0372789
cg22618337	rs11196468:115510108:G:T	-821	27	27	0.131068	0.000438781	0.253919	0.0698464	0.0363679
cg22618337	rs11196469:115510177:A:C	-752	27	27	0.131068	0.000438781	0.253919	0.0698464	0.0363679
cg22618337	rs11196470:115510348:A:T	-581	27	27	0.131068	0.000430886	0.254426	0.0698843	0.0359189
cg22618337	rs11196472:115512330:A:G	1401	15	15	0.0728155	0.000504625	0.312813	0.0870269	0.0400176
cg22618337	rs80026903:115512979:G:A	2050	15	15	0.0728155	0.000469783	0.31418	0.0868998	0.0381152
cg22618337	rs867300:115513098:A:C	2169	15	15	0.0728155	0.000469783	0.31418	0.0868998	0.0381152
cg22618337	rs867301:115513133:T:C	2204	15	15	0.0728155	0.000469783	0.31418	0.0868998	0.0381152
cg22618337	rs34446084:115513545:AAC:A	2616	15	15	0.0728155	0.000468416	0.314281	0.0869072	0.0380454
cg22618337	rs3058374:115513646:T:TACA	2717	15	15	0.0728155	0.000469783	0.31418	0.0868998	0.0381152
cg22618337	rs2009429:115513820:A:G	2891	15	15	0.0728155	0.000468416	0.314281	0.0869072	0.0380454
cg22618337	rs2009428:115513849:G:A	2920	15	15	0.0728155	0.000468416	0.314281	0.0869072	0.0380454
cg22618337	rs11196474:115514405:C:A	3476	15	15	0.0728155	0.000469783	0.31418	0.0868998	0.0381152
cg22618337	rs11196475:115514553:T:C	3624	15	15	0.0728155	0.000468416	0.314281	0.0869072	0.0380454
cg02699612	rs11196472:115512330:A:G	-951	15	15	0.0728155	0.000461129	0.296331	0.0818397	0.0376334
cg02699612	rs80026903:115512979:G:A	-302	15	15	0.0728155	0.000468728	0.295748	0.0817869	0.0380567
cg02699612	rs867300:115513098:A:C	-183	15	15	0.0728155	0.000468728	0.295748	0.0817869	0.0380567
cg02699612	rs867301:115513133:T:C	-148	15	15	0.0728155	0.000468728	0.295748	0.0817869	0.0380567
cg02699612	rs34446084:115513545:AAC:A	264	15	15	0.0728155	0.000470901	0.295683	0.0817996	0.0381798
cg02699612	rs3058374:115513646:T:TACA	365	15	15	0.0728155	0.000468728	0.295748	0.0817869	0.0380567
cg02699612	rs2009429:115513820:A:G	539	15	15	0.0728155	0.000470901	0.295683	0.0817996	0.0381798
cg02699612	rs2009428:115513849:G:A	568	15	15	0.0728155	0.000470901	0.295683	0.0817996	0.0381798
cg02699612	rs11196474:115514405:C:A	1124	15	15	0.0728155	0.000468728	0.295748	0.0817869	0.0380567
cg02699612	rs11196475:115514553:T:C	1272	15	15	0.0728155	0.000470901	0.295683	0.0817996	0.0381798
cg26802691	rs11196503:115557802:C:T	-5459	27	30	0.145631	0.000102542	0.345229	0.0853505	0.0128606
cg26802691	rs150684273:115560236:TATATG:T	-3025	27	30	0.145631	0.000118195	0.339957	0.0848618	0.0142557
cg26802691	rs17091011:115561514:T:C	-1747	27	30	0.145631	0.000122058	0.339924	0.0850408	0.0145917
cg26802691	rs7898665:115563236:C:T	-25	33	38	0.184466	6.36378e-05	0.320127	0.076704	0.00912874
cg26802691	rs7898666:115563237:C:G	-24	33	38	0.184466	6.36378e-05	0.320127	0.076704	0.00912874
cg26802691	rs10509987:115563609:A:T	348	29	33	0.160194	1.03318e-05	0.37075	0.0798409	0.00239613
cg26802691	rs145237344:115563650:TAG:T	389	33	38	0.184466	6.43605e-05	0.321027	0.0769753	0.00920573
cg26802691	rs10885509:115565027:C:T	1766	27	30	0.145631	0.000149361	0.340569	0.0864053	0.0168822
cg13894665	rs180928:115733127:G:A	-9968	68	89	0.432039	5.60145e-05	0.108942	0.0258921	0.00831382
cg13894665	rs180927:115733794:T:G	-9301	68	89	0.432039	5.60145e-05	0.108942	0.0258921	0.00831382
cg13894665	rs180926:115734588:C:T	-8507	68	89	0.432039	5.60145e-05	0.108942	0.0258921	0.00831382
cg13894665	rs11388544:115735438:A:AG	-7657	64	84	0.407767	9.51697e-05	0.104522	0.0257118	0.0121915
cg13894665	rs138551146:115735613:GGAGAGAGAAAGA:G	-7482	68	89	0.432039	5.60145e-05	0.108942	0.0258921	0.00831382
cg13894665	rs71007448:115735653:A:ATGTGTGTGTG	-7442	68	91	0.441748	2.92195e-05	0.110275	0.0251857	0.00515476
cg13894665	rs180923:115735813:A:T	-7282	68	89	0.432039	5.60145e-05	0.108942	0.0258921	0.00831382
cg13894665	rs180922:115736097:C:T	-6998	68	89	0.432039	4.10002e-05	0.110732	0.0258115	0.00659787
cg13894665	rs180921:115736190:C:G	-6905	68	89	0.432039	5.60145e-05	0.108942	0.0258921	0.00831382
cg13894665	rs180920:115736435:T:C	-6660	64	84	0.407767	9.51697e-05	0.104522	0.0257118	0.0121915
cg13894665	rs138839712:115736458:TTCCC:T	-6637	67	88	0.427184	0.000196819	0.10121	0.0261887	0.0205782
cg13894665	rs180919:115737076:A:G	-6019	68	89	0.432039	5.59755e-05	0.108963	0.025896	0.0083097
cg13894665	rs180918:115737344:G:C	-5751	65	85	0.412621	3.08418e-05	0.111668	0.0255859	0.00536526
cg13894665	rs180917:115737363:T:G	-5732	69	96	0.466019	0.000132723	0.0983753	0.0247538	0.015519
cg13894665	rs180916:115737559:C:A	-5536	68	89	0.432039	5.6284e-05	0.108901	0.0258901	0.008344
cg13894665	rs180915	-5246	68	92	0.446602	0.000154263	0.0997374	0.0253618	0.0172692
cg13894665	rs180914:115738015:A:G	-5080	69	96	0.466019	0.000132345	0.0984093	0.0247574	0.0154857
cg13894665	rs180913:115738559:T:A	-4536	64	84	0.407767	9.40848e-05	0.104581	0.0257067	0.0120943
cg13894665	rs180912:115741828:T:G	-1267	68	89	0.432039	6.15053e-05	0.108549	0.0259521	0.0089121
cg13894665	rs180911:115742203:T:C	-892	69	96	0.466019	0.000145291	0.0981418	0.0248512	0.0165487
cg13894665	rs180910:115742446:T:C	-649	68	89	0.432039	6.02194e-05	0.108866	0.0259931	0.00877862
cg13894665	rs180909:115742477:A:G	-618	68	89	0.432039	6.03264e-05	0.108878	0.0259987	0.00878982
cg13894665	rs180908:115743098:C:T	3	68	92	0.446602	0.000165743	0.0996486	0.0254684	0.0181948
cg11034326	rs10787511:115747997:A:G	109	78	98	0.475728	1.06985e-08	-0.569662	0.091399	1.57911e-05
cg11034326	rs12767891	445	78	101	0.490291	8.39382e-11	-0.611888	0.0843398	5.08166e-07
cg11284299	rs12412523:115786838:T:C	1933	47	57	0.276699	1.63423e-05	0.178861	0.0395029	0.00335416
cg11284299	rs7074495:115793787:A:C	8882	45	54	0.262136	1.00993e-05	0.186232	0.0400558	0.00235611
cg25236139	rs2773469:115798895:A:G	23	51	60	0.291262	0.000566563	-0.19674	0.0552595	0.0432944
cg06423252	rs71486238:115851703:T:A	-9525	31	38	0.184466	0.000245904	-0.169703	0.0446366	0.0241352
cg06423252	rs12779122:115856923:A:G	-4305	35	42	0.203883	0.000689175	-0.156188	0.0445994	0.0493757
cg06423252	rs12779707:115857076:C:T	-4152	36	43	0.208738	0.000529113	-0.159262	0.0444805	0.0413278
cg06423252	rs3895537:115857972:A:G	-3256	36	43	0.208738	0.000519241	-0.159802	0.0445623	0.0408131
cg06423252	rs112473590:115858759:G:A	-2469	36	43	0.208738	0.000513587	-0.160118	0.0446103	0.0405034
cg06423252	rs11593066:115860532:G:A	-696	36	43	0.208738	0.00048013	-0.160684	0.0445227	0.0386886
cg06423252	rs33994793:115868460:A:ACAG	7232	36	43	0.208738	0.000553023	-0.159397	0.0446809	0.0425857
cg06423252	rs12777663:115869446:A:G	8218	36	43	0.208738	0.000556737	-0.159512	0.044738	0.0427759
cg17741865	rs17091401:115933366:C:T	-1068	38	43	0.208738	0.000378226	-0.390973	0.106285	0.0327148
cg11834974	rs73357561:115970029:A:G	-1152	14	14	0.0679612	0.000517894	0.371094	0.103461	0.0407366
cg11834974	rs17715067:115973040:A:G	1859	22	24	0.116505	0.00041724	0.277349	0.0759848	0.0351053
cg14405343	rs3851557:116000669:G:C	-5813	15	15	0.0728155	0.000278839	0.11986	0.0318257	0.0264046
cg13665695	rs11196683:116048203:A:C	6862	38	41	0.199029	0.000661218	0.15668	0.0445825	0.0479691
cg12177113	rs537432	-965	75	97	0.470874	4.33662e-05	-0.137391	0.0321362	0.00687859
cg12177113	rs59854616:116154209:GT:G	890	75	98	0.475728	4.02091e-05	0.138516	0.0322495	0.00650591
cg14547188	rs7916394:116221938:A:G	-9893	74	91	0.441748	0.000388819	0.203037	0.0553153	0.0333679
cg14547188	rs7067793:116230719:A:C	-1112	76	102	0.495146	3.94753e-06	0.23605	0.0483566	0.00117965
cg14547188	rs6585284:116231620:T:G	-211	72	93	0.451456	1.40863e-05	0.228164	0.0499758	0.00301413
cg14547188	rs11196754:116232161:C:G	330	73	100	0.485437	9.36422e-07	0.239921	0.0459107	0.00041783
cg14547188	rs1535386	1403	70	90	0.436893	8.78838e-06	-0.230412	0.0491905	0.00211976
cg14547188	rs3215698:116233354:AT:A	1523	73	93	0.451456	1.82551e-05	-0.23064	0.0512582	0.00363654
cg14547188	rs11196755:116234392:A:G	2561	72	94	0.456311	2.87985e-05	0.21718	0.0495591	0.00510001
cg14547188	rs11196756:116234399:C:A	2568	72	94	0.456311	2.87985e-05	0.21718	0.0495591	0.00510001
cg13782937	rs11196843:116418449:C:T	267	60	75	0.364078	6.26997e-05	0.101963	0.0244077	0.00903383
cg26975768	rs76841353:116448886:C:T	3760	12	12	0.0582524	0.000242882	-0.269614	0.0708508	0.0239323
cg26975768	rs114746487:116451259:A:G	6133	11	11	0.0533981	0.000351211	-0.274754	0.0742585	0.0310785
cg02531929	10:116460496:G:GA	-8521	16	18	0.0873786	2.90816e-07	-0.500315	0.0910111	0.000176663
cg02531929	rs58890426:116461149:C:T	-7868	20	23	0.11165	9.54298e-05	-0.34039	0.0837495	0.012213
cg02531929	rs79453521:116461237:A:G	-7780	15	17	0.0825243	1.23789e-08	-0.55754	0.089911	1.7636e-05
cg02531929	rs217190	-7595	34	40	0.194175	0.000303263	-0.254202	0.0679295	0.0280266
cg02531929	rs217191:116461684:A:G	-7333	35	41	0.199029	0.000107027	-0.270552	0.0670819	0.013263
cg02531929	rs79312688:116466202:G:C	-2815	15	17	0.0825243	1.19365e-08	-0.559025	0.0900357	1.71897e-05
cg02531929	rs114947364:116467747:C:T	-1270	15	17	0.0825243	1.28529e-08	-0.558504	0.0901853	1.81187e-05
cg02531929	rs76880362:116468970:T:C	-47	15	17	0.0825243	1.2585e-08	-0.559105	0.0902156	1.78401e-05
cg02531929	rs808258:116469394:G:A	377	39	47	0.228155	0.000432788	-0.235773	0.0647837	0.036025
cg00724095	rs217194:116463080:T:C	-6908	61	78	0.378641	5.65092e-09	-0.333612	0.0523678	1.01865e-05
cg00724095	rs1968122:116463982:T:C	-6006	71	92	0.446602	9.00082e-08	-0.313055	0.0543196	7.36112e-05
cg00724095	rs1029789:116464387:C:T	-5601	71	90	0.436893	3.38142e-06	-0.284394	0.0578139	0.00105686
cg00724095	rs808256:116469968:G:A	-20	71	94	0.456311	9.9128e-09	-0.326862	0.0523043	1.49585e-05
cg00724095	rs719894:116470611:G:A	623	56	70	0.339806	0.00022628	-0.228549	0.0597451	0.0227681
cg00724095	rs719895:116470649:G:A	661	71	94	0.456311	9.98243e-09	-0.327186	0.0523689	1.50258e-05
cg00724095	rs719896:116470847:T:A	859	71	94	0.456311	1.00597e-08	-0.326851	0.0523292	1.50968e-05
cg00724095	rs808253:116471064:G:A	1076	72	95	0.461165	1.29785e-08	-0.327786	0.0529479	1.82409e-05
cg00724095	rs808251:116472505:C:T	2517	49	60	0.291262	4.08162e-06	-0.288272	0.0591533	0.00120861
cg00724095	rs808263:116479396:A:G	9408	49	60	0.291262	4.34101e-06	-0.287074	0.05909	0.00126241
cg10961187	rs7080397:116514857:G:T	2762	61	77	0.373786	0.000222448	-0.130636	0.0341066	0.0224943
cg18753596	rs12771956:116576228:C:G	-2990	46	56	0.271845	0.000701638	-0.158633	0.0453669	0.0499735
cg18753596	rs61867967:116587383:T:C	8165	48	59	0.286408	0.000503794	-0.160073	0.0445277	0.0399713
cg17763454	rs7072364:116620840:G:A	-9767	58	74	0.359223	3.8417e-06	-0.25488	0.0521432	0.00115697
cg17763454	rs34064819:116621154:C:A	-9453	58	74	0.359223	3.8417e-06	-0.25488	0.0521432	0.00115697
cg17763454	rs41284358:116622339:A:G	-8268	58	74	0.359223	3.87959e-06	-0.254717	0.0521354	0.00116489
cg17763454	rs34310961:116623010:A:AT	-7597	58	74	0.359223	3.87959e-06	-0.254717	0.0521354	0.00116489
cg17763454	rs36089581:116623059:G:C	-7548	46	56	0.271845	0.000418603	-0.215463	0.0590454	0.0351848
cg17763454	rs1046492:116624067:C:T	-6540	58	74	0.359223	3.87959e-06	-0.254717	0.0521354	0.00116489
cg17763454	rs61868018:116624809:T:C	-5798	58	74	0.359223	3.87959e-06	-0.254717	0.0521354	0.00116489
cg17763454	rs7923295:116625159:C:G	-5448	58	74	0.359223	3.87959e-06	-0.254717	0.0521354	0.00116489
cg17763454	rs7895551:116625481:C:T	-5126	58	74	0.359223	3.86216e-06	-0.254832	0.0521472	0.00116124
cg17763454	rs60820172:116625891:C:T	-4716	58	74	0.359223	3.86216e-06	-0.254832	0.0521472	0.00116124
cg17763454	rs7093674:116626907:T:G	-3700	58	74	0.359223	3.86216e-06	-0.254832	0.0521472	0.00116124
cg17763454	rs7093686:116626940:T:C	-3667	67	89	0.432039	6.78358e-05	-0.215452	0.0518357	0.00957153
cg17763454	rs7075888:116627117:C:T	-3490	58	74	0.359223	3.86216e-06	-0.254832	0.0521472	0.00116124
cg17763454	rs7094072:116627160:T:G	-3447	58	74	0.359223	3.86216e-06	-0.254832	0.0521472	0.00116124
cg17763454	rs1966384:116627910:G:T	-2697	58	74	0.359223	9.10601e-06	-0.246442	0.0527125	0.00217665
cg17763454	rs7909657:116629096:C:G	-1511	58	74	0.359223	3.86216e-06	-0.254832	0.0521472	0.00116124
cg17763454	rs7909566:116629136:A:G	-1471	58	74	0.359223	3.86216e-06	-0.254832	0.0521472	0.00116124
cg17763454	rs35628210:116630031:G:A	-576	58	74	0.359223	3.1723e-06	-0.257012	0.0520835	0.00100888
cg17763454	rs17092542:116630289:G:A	-318	58	74	0.359223	3.86216e-06	-0.254832	0.0521472	0.00116124
cg17763454	rs12772800:116630962:A:G	355	49	61	0.296117	3.80494e-05	-0.239649	0.0556081	0.00624847
cg17763454	rs12773943:116631184:G:A	577	58	74	0.359223	4.67698e-06	-0.253594	0.0523953	0.00133365
cg17763454	rs36036948:116631649:A:G	1042	57	73	0.354369	7.22302e-06	-0.248218	0.0524455	0.00183752
cg17763454	rs35010779:116631816:A:C	1209	58	74	0.359223	5.45363e-06	-0.252366	0.0525512	0.0014933
cg17763454	rs35622181:116631976:C:T	1369	58	74	0.359223	5.58019e-06	-0.252236	0.0525858	0.00151972
cg17763454	rs68085797:116632130:A:T	1523	48	58	0.281553	0.000229112	-0.220835	0.0577819	0.0229675
cg17763454	rs7074729:116632257:C:G	1650	58	73	0.354369	5.92928e-06	-0.251747	0.052648	0.00158678
cg17763454	rs11462305:116634024:A:AT	3417	58	73	0.354369	6.67927e-06	-0.25064	0.052741	0.00173273
cg17763454	rs7072356:116634651:T:C	4044	58	73	0.354369	6.66048e-06	-0.250808	0.0527688	0.00172914
cg17763454	rs11818114:116634878:G:C	4271	58	73	0.354369	6.76489e-06	-0.250675	0.0527835	0.00174991
cg17763454	rs11818115:116634891:G:A	4284	58	73	0.354369	6.76489e-06	-0.250675	0.0527835	0.00174991
cg17763454	rs12765350:116635305:G:A	4698	58	73	0.354369	6.76489e-06	-0.250675	0.0527835	0.00174991
cg17763454	rs11319655:116637637:AT:A	7030	74	100	0.485437	9.08915e-05	-0.215657	0.0528881	0.0117906
cg17763454	rs61868024:116637939:A:G	7332	63	80	0.38835	0.000333017	-0.201908	0.0543452	0.0299126
cg17763454	rs35453961:116638166:T:C	7559	63	80	0.38835	0.00033141	-0.201828	0.0543034	0.0298074
cg17763454	rs148119016:116639171:AAATGC:A	8564	63	80	0.38835	0.000335626	-0.201676	0.0543156	0.030081
cg17763454	rs12775180:116639754:T:C	9147	49	60	0.291262	9.88165e-05	-0.229614	0.0566263	0.0125235
cg17763454	rs11196959:116640176:T:C	9569	63	80	0.38835	0.000357106	-0.201154	0.0544372	0.0314338
cg07733920	rs7093674:116626907:T:G	-9450	58	74	0.359223	3.24917e-05	0.112959	0.0259623	0.00557982
cg07733920	rs7093686:116626940:T:C	-9417	67	89	0.432039	0.000275239	0.0966007	0.0256246	0.0261528
cg07733920	rs7075888:116627117:C:T	-9240	58	74	0.359223	3.24917e-05	0.112959	0.0259623	0.00557982
cg07733920	rs7094072:116627160:T:G	-9197	58	74	0.359223	3.24917e-05	0.112959	0.0259623	0.00557982
cg07733920	rs1966384:116627910:G:T	-8447	58	74	0.359223	3.86527e-05	0.112257	0.026073	0.00632324
cg07733920	rs7909657:116629096:C:G	-7261	58	74	0.359223	3.24917e-05	0.112959	0.0259623	0.00557982
cg07733920	rs7909566:116629136:A:G	-7221	58	74	0.359223	3.24917e-05	0.112959	0.0259623	0.00557982
cg07733920	rs35628210:116630031:G:A	-6326	58	74	0.359223	2.98301e-05	0.113518	0.0259583	0.00523324
cg07733920	rs17092542:116630289:G:A	-6068	58	74	0.359223	3.24917e-05	0.112959	0.0259623	0.00557982
cg07733920	rs12772800:116630962:A:G	-5395	49	61	0.296117	1.0013e-05	0.124613	0.02679	0.00234145
cg07733920	rs12773943:116631184:G:A	-5173	58	74	0.359223	3.20245e-05	0.113372	0.0260347	0.00551958
cg07733920	rs36036948:116631649:A:G	-4708	57	73	0.354369	1.4848e-05	0.117281	0.0257638	0.00313083
cg07733920	rs35010779:116631816:A:C	-4541	58	74	0.359223	3.2357e-05	0.113484	0.0260765	0.00556293
cg07733920	rs35622181:116631976:C:T	-4381	58	74	0.359223	3.22601e-05	0.113551	0.0260872	0.00555188
cg07733920	rs68085797:116632130:A:T	-4227	48	58	0.281553	5.46103e-06	0.130682	0.0272143	0.00149474
cg07733920	rs7074729:116632257:C:G	-4100	58	73	0.354369	3.23003e-05	0.113612	0.0261033	0.00555527
cg07733920	rs11462305:116634024:A:AT	-2333	58	73	0.354369	3.0259e-05	0.114057	0.0261037	0.00528793
cg07733920	rs7072356:116634651:T:C	-1706	58	73	0.354369	3.24025e-05	0.113729	0.026135	0.00556858
cg07733920	rs11818114:116634878:G:C	-1479	58	73	0.354369	3.24256e-05	0.11374	0.0261386	0.00557211
cg07733920	rs11818115:116634891:G:A	-1466	58	73	0.354369	3.24256e-05	0.11374	0.0261386	0.00557211
cg07733920	rs12765350:116635305:G:A	-1052	58	73	0.354369	3.24256e-05	0.11374	0.0261386	0.00557211
cg07733920	rs11319655:116637637:AT:A	1280	74	100	0.485437	0.000207964	0.100097	0.0260049	0.0214235
cg07733920	rs61868024:116637939:A:G	1582	63	80	0.38835	0.00020697	0.101644	0.0263975	0.0213463
cg07733920	rs35453961:116638166:T:C	1809	63	80	0.38835	0.000210274	0.101468	0.0263823	0.0215895
cg07733920	rs148119016:116639171:AAATGC:A	2814	63	80	0.38835	0.000210522	0.101471	0.0263854	0.0216081
cg07733920	rs12775180:116639754:T:C	3397	49	60	0.291262	1.04238e-05	0.125534	0.0270468	0.0024124
cg07733920	rs11196959:116640176:T:C	3819	63	80	0.38835	0.000200156	0.101967	0.0264167	0.020835
cg07733920	rs749649:116641999:G:A	5642	48	58	0.281553	5.6806e-06	0.131203	0.0273782	0.00154037
cg07733920	rs17794346:116643095:T:C	6738	46	55	0.26699	9.72106e-06	0.130649	0.0280432	0.00228881
cg07733920	rs10885622	7487	63	79	0.383495	0.000332645	0.100068	0.0269319	0.0298903
cg07733920	rs17721283	7784	49	59	0.286408	1.39374e-05	0.126098	0.0276035	0.00298903
cg07733920	rs7898347:116644324:G:A	7967	63	79	0.383495	0.000302963	0.100986	0.026984	0.0280069
cg07733920	rs7918129:116644467:T:C	8110	63	79	0.383495	0.000302963	0.100986	0.026984	0.0280069
cg07733920	rs7077148:116644896:A:G	8539	63	79	0.383495	0.000302963	0.100986	0.026984	0.0280069
cg07733920	rs34187191:116644972:G:T	8615	49	59	0.286408	1.40794e-05	0.126078	0.0276147	0.00301283
cg09944435	rs11319655:116637637:AT:A	506	74	100	0.485437	0.000515222	0.191081	0.0532508	0.0405967
cg15692096	rs185963450:116686790:T:A	-8832	59	72	0.349515	0.000677066	0.17428	0.0496904	0.0487653
cg15692096	rs11196991:116689519:C:T	-6103	59	72	0.349515	0.000669549	0.174407	0.0496792	0.0483886
cg15692096	rs11196996:116694631:C:T	-991	59	72	0.349515	0.000669549	0.174407	0.0496792	0.0483886
cg15692096	rs11196999:116700632:G:A	5010	59	72	0.349515	0.000669549	0.174407	0.0496792	0.0483886
cg15692096	rs11197000:116701469:C:T	5847	59	72	0.349515	0.000669549	0.174407	0.0496792	0.0483886
cg15692096	rs10885635:116701552:A:T	5930	61	74	0.359223	0.000304761	0.187159	0.0500326	0.0281221
cg26622634	rs2420238:117886851:C:A	-85	56	70	0.339806	0.000269791	0.18057	0.0478263	0.0257772
cg26622634	rs12781658:117887320:G:C	384	56	70	0.339806	0.000267817	0.180633	0.0478166	0.0256505
cg26622634	rs12781677	408	56	70	0.339806	0.000260987	0.180823	0.047774	0.0251818
cg26622634	rs11597916:117887608:T:C	672	56	70	0.339806	0.000267817	0.180633	0.0478166	0.0256505
cg26622634	rs3824839:117887993:C:T	1057	56	70	0.339806	0.000274122	0.180331	0.0478205	0.0260824
cg26622634	rs3781526:117888029:G:A	1093	57	71	0.34466	0.000338541	0.178448	0.048092	0.0302668
cg26622634	rs3837362:117888366:AT:A	1430	56	70	0.339806	0.00026729	0.180681	0.0478221	0.0256146
cg26622634	rs12769014:117888566:C:G	1630	56	70	0.339806	0.000267817	0.180633	0.0478166	0.0256505
cg26622634	rs12771201:117888887:T:C	1951	56	70	0.339806	0.000274131	0.180486	0.0478616	0.026083
cg26622634	rs12771220:117888908:T:C	1972	56	70	0.339806	0.000273445	0.181027	0.047996	0.0260338
cg26622634	rs12769612:117888924:A:T	1988	56	70	0.339806	0.000273799	0.180489	0.0478581	0.0260596
cg26622634	rs10787622:117889460:C:T	2524	56	70	0.339806	0.000268616	0.180739	0.0478553	0.0257093
cg26622634	rs10787623:117889490:G:T	2554	56	70	0.339806	0.000275268	0.180519	0.0478854	0.0261548
cg26622634	rs10787624:117889560:G:A	2624	56	70	0.339806	0.000268616	0.180739	0.0478553	0.0257093
cg26622634	rs10787626:117889656:A:C	2720	56	70	0.339806	0.000268616	0.180739	0.0478553	0.0257093
cg26622634	rs7085153:117890853:A:G	3917	56	70	0.339806	0.000227746	0.184222	0.0481807	0.0228713
cg26622634	rs7085306:117890961:A:G	4025	56	70	0.339806	0.000209486	0.185116	0.0481181	0.0215319
cg26622634	rs67624163:117891914:GTA:G	4978	57	71	0.34466	0.000227607	0.183703	0.0480426	0.0228635
cg26622634	rs3781530:117892146:A:G	5210	57	71	0.34466	0.00022711	0.184312	0.0481943	0.0228293
cg04850177	rs2901098:117894117:T:C	-4412	42	47	0.228155	0.00067677	-0.102019	0.0290864	0.0487494
cg25120325	rs12415178:118380345:C:T	-26	58	77	0.373786	4.12031e-05	-0.359111	0.0837338	0.00662195
cg25120325	rs2286776:118383703:C:T	3332	54	70	0.339806	0.000110961	-0.347608	0.0863988	0.0136146
cg25120325	rs113988880:118383815:T:TCA	3444	54	70	0.339806	0.000110961	-0.347608	0.0863988	0.0136146
cg25120325	rs10749226:118384007:A:G	3636	54	70	0.339806	0.000110961	-0.347608	0.0863988	0.0136146
cg25120325	rs10787709:118384283:C:G	3912	54	70	0.339806	0.000110961	-0.347608	0.0863988	0.0136146
cg25120325	rs12267882:118384663:T:C	4292	55	71	0.34466	8.73203e-05	-0.353786	0.0865326	0.0114589
cg25120325	rs10885993:118384841:T:C	4470	55	71	0.34466	8.66935e-05	-0.353969	0.0865362	0.0113985
cg25120325	rs11197766:118384842:T:C	4471	54	70	0.339806	0.00011112	-0.3476	0.0864052	0.0136274
cg25120325	rs10885994:118385055:T:C	4684	55	71	0.34466	8.71383e-05	-0.353821	0.0865294	0.011441
cg25120325	rs9787637:118386325:C:A	5954	55	71	0.34466	8.71383e-05	-0.353821	0.0865294	0.011441
cg25120325	rs2286778:118386654:A:C	6283	55	71	0.34466	9.01068e-05	-0.352916	0.0864998	0.0117165
cg25120325	rs9787662:118386828:C:A	6457	55	71	0.34466	8.71383e-05	-0.353821	0.0865294	0.011441
cg25120325	rs9787663:118386869:G:A	6498	55	71	0.34466	8.71383e-05	-0.353821	0.0865294	0.011441
cg25120325	rs9787450:118386953:T:C	6582	55	71	0.34466	8.69951e-05	-0.354011	0.0865663	0.0114276
cg25120325	rs9787451:118386957:T:C	6586	55	71	0.34466	8.69951e-05	-0.354011	0.0865663	0.0114276
cg25120325	rs9787664:118387022:C:A	6651	55	71	0.34466	8.63107e-05	-0.354255	0.0865808	0.0113619
cg25120325	rs9787530:118387038:A:T	6667	55	71	0.34466	8.63107e-05	-0.354255	0.0865808	0.0113619
cg25120325	rs9787666:118387066:G:A	6695	55	71	0.34466	8.63107e-05	-0.354255	0.0865808	0.0113619
cg25120325	rs12768167:118387148:C:T	6777	55	71	0.34466	8.4241e-05	-0.354566	0.0865181	0.0111573
cg25120325	rs12768516:118387152:G:A	6781	55	71	0.34466	8.4241e-05	-0.354566	0.0865181	0.0111573
cg25120325	rs11544712:118387282:A:G	6911	55	71	0.34466	8.69951e-05	-0.354011	0.0865663	0.0114276
cg25120325	rs35913395:118388675:TG:T	8304	57	73	0.354369	0.000541032	-0.317208	0.0887563	0.0419704
cg25120325	rs11595145:118389065:A:G	8694	56	72	0.349515	0.000223654	-0.335533	0.0876365	0.0225826
cg25120325	rs10787710:118390025:T:C	9654	56	72	0.349515	0.000223334	-0.335546	0.0876306	0.0225593
cg04256345	rs9633727	-1235	75	101	0.490291	0.00023223	0.10335	0.0270687	0.0231839
cg03908400	rs3010484:118457364:G:A	6545	31	36	0.174757	0.000248338	0.183786	0.0483764	0.0242993
cg03908400	rs2907229:118457365:C:T	6546	31	36	0.174757	0.000248338	0.183786	0.0483764	0.0242993
cg03908400	rs5788185:118458651:A:AT	7832	33	38	0.184466	0.000299889	0.179891	0.0480306	0.0277992
cg11795975	rs66688522:118493393:G:A	-9555	38	41	0.199029	0.000509847	0.289415	0.0805855	0.0402989
cg04371212	rs1681734:118558377:C:G	-4900	57	73	0.354369	1.51681e-05	0.144385	0.0317558	0.00317782
cg04371212	rs7909152:118558383:G:A	-4894	67	93	0.451456	0.000319494	-0.113127	0.0303518	0.0290414
cg04371212	rs7912336:118558736:A:T	-4541	67	94	0.456311	0.000531005	-0.108051	0.0301867	0.0414284
cg04371212	rs1681736:118558889:C:T	-4388	55	71	0.34466	4.14778e-05	0.136122	0.0317525	0.00665566
cg04371212	rs57161236:118559866:AGGGGGT:A	-3411	56	72	0.349515	4.63217e-05	0.135551	0.0318354	0.0072223
cg04371212	rs7097645	-2800	67	93	0.451456	0.000324746	-0.112596	0.0302474	0.029383
cg04371212	rs1681742:118565251:T:C	1974	53	67	0.325243	1.4607e-05	0.146511	0.0321557	0.00309363
cg04371212	rs1681743	2224	54	67	0.325243	4.40983e-05	0.140896	0.0329901	0.00696439
cg22711009	rs740363	-527	67	88	0.427184	1.84331e-06	0.223909	0.0442047	0.000683018
cg22711009	rs1626678:118576146:G:A	13	68	89	0.432039	1.70411e-06	0.226986	0.044647	0.000644618
cg22711009	rs10787730:118577736:C:T	1603	68	90	0.436893	1.56444e-05	0.204512	0.0450578	0.00325347
cg22711009	rs11596173:118578918:C:T	2785	69	91	0.441748	4.4281e-06	0.217622	0.0448391	0.00128196
cg22711009	rs1681725:118585449:A:G	9316	72	96	0.466019	5.06513e-05	-0.197225	0.0465784	0.0077164
cg17677490	rs7083543:118616110:C:T	7971	48	53	0.257282	0.00013542	0.409106	0.103086	0.0157378
cg17677490	rs7087685:118616537:G:A	8398	48	53	0.257282	0.000136018	0.408948	0.103077	0.0157845
cg17677490	rs9421248:118617261:T:C	9122	48	53	0.257282	0.000157715	0.403372	0.102732	0.017549
cg24405543	rs7893993	1301	64	81	0.393204	3.31791e-06	-0.47074	0.0956066	0.00104408
cg08316550	rs12146270:12118635:C:T	-5885	73	100	0.485437	8.90304e-06	-0.229625	0.0490564	0.00214025
cg08316550	rs12360222:12118744:G:A	-5776	73	101	0.490291	9.96495e-06	-0.226345	0.0486485	0.00233247
cg08316550	rs12360248:12118966:G:A	-5554	74	102	0.495146	2.79483e-06	-0.239755	0.0482864	0.000919517
cg08316550	rs11257521:12120445:C:A	-4075	74	102	0.495146	2.7473e-06	-0.239756	0.0482464	0.000907686
cg08316550	rs10906064:12121140:T:G	-3380	74	102	0.495146	2.7282e-06	-0.239739	0.0482267	0.000903226
cg08316550	rs10795928:12122080:C:G	-2440	74	102	0.495146	2.69214e-06	-0.239927	0.0482333	0.000894711
cg08316550	rs10752254	-2165	74	102	0.495146	2.7055e-06	-0.239253	0.0481094	0.000897836
cg08316550	rs10737059:12122688:T:C	-1832	74	102	0.495146	2.68805e-06	-0.239756	0.0481954	0.000893793
cg08316550	rs11257525:12123197:T:C	-1323	74	102	0.495146	2.68805e-06	-0.239756	0.0481954	0.000893793
cg08316550	rs10906066:12123666:C:T	-854	74	102	0.495146	2.70929e-06	-0.239724	0.0482074	0.000898639
cg08316550	rs10795929:12123771:C:A	-749	74	102	0.495146	2.68805e-06	-0.239756	0.0481954	0.000893793
cg08316550	rs10906067:12124332:G:C	-188	75	103	0.5	1.14666e-06	-0.249717	0.0482259	0.000481153
cg08316550	rs10906068:12125054:G:A	534	74	102	0.495146	2.68182e-06	-0.239861	0.048211	0.000892285
cg08316550	rs10906069:12125614:T:C	1094	74	102	0.495146	2.68182e-06	-0.239861	0.048211	0.000892285
cg08316550	rs10906070:12125655:C:T	1135	74	102	0.495146	2.68182e-06	-0.239861	0.048211	0.000892285
cg08316550	rs10906071:12125890:C:T	1370	74	102	0.495146	2.69926e-06	-0.239357	0.0481249	0.000896514
cg08316550	rs10795930:12125909:A:G	1389	74	102	0.495146	2.68182e-06	-0.239861	0.048211	0.000892285
cg08316550	rs12253551:12126071:G:A	1551	74	102	0.495146	2.68182e-06	-0.239861	0.048211	0.000892285
cg08316550	rs11257527:12126490:A:T	1970	73	101	0.490291	1.89824e-06	-0.240767	0.0475989	0.000698321
cg08316550	rs10795931:12127138:G:A	2618	72	100	0.485437	6.85197e-06	-0.227616	0.0479601	0.00176689
cg08316550	rs10795932:12127186:A:G	2666	73	101	0.490291	1.89824e-06	-0.240767	0.0475989	0.000698321
cg08316550	rs10795933:12127271:T:C	2751	74	102	0.495146	8.0574e-07	-0.250492	0.047612	0.000374044
cg08316550	rs11257528:12127899:G:A	3379	73	101	0.490291	1.88427e-06	-0.240833	0.0475954	0.000694307
cg08316550	rs3740015:12131081:T:G	6561	73	101	0.490291	1.88333e-06	-0.24076	0.0475798	0.000694079
cg08316550	rs11257530:12131701:A:G	7181	73	101	0.490291	1.88333e-06	-0.24076	0.0475798	0.000694079
cg08316550	rs10906074:12132926:G:C	8406	73	101	0.490291	1.88333e-06	-0.24076	0.0475798	0.000694079
cg06500587	rs6602563	6841	65	80	0.38835	5.50278e-05	-0.125121	0.0297038	0.00820815
cg06500587	rs6602564:12170659:T:C	7326	62	76	0.368932	0.000390166	-0.111485	0.0303811	0.033451
cg06500587	rs3060441:12171188:ACT:A	7855	66	83	0.402913	4.02144e-05	-0.125021	0.0291077	0.00650591
cg06500587	rs11257552:12171740:G:A	8407	67	93	0.451456	0.000242131	-0.102414	0.0269067	0.0238793
cg06500587	rs7070684:12172775:G:A	9442	67	93	0.451456	0.000223851	-0.103131	0.0269381	0.0225956
cg06500587	rs10752256:12173172:G:A	9839	65	82	0.398058	5.96403e-05	-0.123485	0.0294654	0.00871783
cg01723142	rs7910938:12242095:T:C	4893	75	95	0.461165	6.84085e-05	-0.331927	0.0799015	0.00962939
cg01723142	rs1878798:12243483:G:C	6281	72	91	0.441748	0.00014976	0.31099	0.0789156	0.0169141
cg01723142	rs10906097	6619	74	93	0.451456	7.7661e-05	-0.327182	0.079411	0.0105295
cg01723142	rs12783223:12244143:T:C	6941	74	93	0.451456	7.93543e-05	-0.328985	0.0799614	0.0106808
cg12089187	rs4747968	8448	75	98	0.475728	0.00061987	-0.16695	0.0472462	0.0459457
cg25638783	rs4514317:12276305:A:G	-9617	60	76	0.368932	0.000373095	0.18598	0.0505037	0.0324111
cg25638783	rs7068966:12277992:C:T	-7930	75	98	0.475728	0.000417578	-0.185738	0.0508898	0.0351226
cg25638783	rs7090277:12278021:T:A	-7901	75	98	0.475728	0.000417578	-0.185738	0.0508898	0.0351226
cg25638783	rs7911095:12282002:G:C	-3920	63	76	0.368932	6.96959e-05	0.219836	0.0529829	0.00975593
cg25638783	rs142354895:12283965:G:GTTC	-1957	73	91	0.441748	1.0792e-05	-0.23917	0.0516267	0.00247523
cg25638783	rs35475841:12284082:A:AC	-1840	74	95	0.461165	4.77406e-05	-0.214115	0.050381	0.0073848
cg25638783	rs5783244:12285128:TG:T	-794	75	98	0.475728	0.000439859	-0.185221	0.0509595	0.0364301
cg25638783	rs146552456:12285627:C:CA	-295	75	98	0.475728	0.000444027	-0.185168	0.0509837	0.0366623
cg25638783	rs2001546:12285735:A:T	-187	75	98	0.475728	0.000444027	-0.185168	0.0509837	0.0366623
cg25264779	rs12098734:12289511:T:C	1493	74	94	0.456311	0.000650719	0.089404	0.0254049	0.0474635
cg25264779	rs1051055:12292454:A:G	4436	58	69	0.334951	0.000320292	0.0988243	0.0265195	0.0290942
cg04687190	rs7085366:12506212:C:G	-2630	54	66	0.320388	3.02609e-05	-0.285091	0.0652475	0.00528813
cg04687190	rs200321849:12506827:A:G	-2015	50	62	0.300971	1.09128e-05	-0.295741	0.0638768	0.00249598
cg04687190	rs1571211:12508867:G:C	25	54	66	0.320388	3.07884e-05	-0.28346	0.0649409	0.00535835
cg04687190	rs1571212	114	53	65	0.315534	8.17945e-06	-0.300636	0.0639383	0.00201084
cg04687190	rs1977440:12509293:A:C	451	53	65	0.315534	7.83448e-06	-0.30146	0.0639676	0.00194764
cg04687190	rs7915889:12509571:A:G	729	53	65	0.315534	7.79407e-06	-0.301611	0.0639822	0.00193987
cg04687190	rs7898909:12509661:G:A	819	53	65	0.315534	7.7427e-06	-0.301861	0.0640128	0.00192973
cg04687190	rs11257811:12510051:C:T	1209	53	65	0.315534	7.69758e-06	-0.301905	0.0640025	0.00192066
cg06594405	rs56185721:12512941:G:A	-444	12	12	0.0582524	0.000360218	0.315427	0.0854201	0.0316309
cg10476206	rs4747985:12537868:T:C	-5577	70	92	0.446602	0.000461062	0.116774	0.0322498	0.0376303
cg10476206	rs2399848:12537906:G:T	-5539	69	91	0.441748	0.000457387	0.115718	0.0319377	0.0374078
cg10476206	rs12768808:12540460:A:G	-2985	58	65	0.315534	0.0004867	0.138017	0.0382842	0.0390664
cg10476206	rs143485675:12542204:G:T	-1241	28	29	0.140777	1.65251e-05	0.217706	0.0481124	0.00338171
cg10476206	rs77058724:12543003:C:T	-442	28	29	0.140777	1.68551e-05	0.217942	0.0482181	0.00342835
cg10476206	rs45594139:12545332:C:T	1887	31	32	0.15534	0.000221977	0.182179	0.0475562	0.0224587
cg10476206	rs192128746:12546107:G:A	2662	24	24	0.116505	3.69591e-05	0.236134	0.0546957	0.00612318
cg10476206	rs79244075:12546308:C:T	2863	31	33	0.160194	1.88709e-05	0.204673	0.0455731	0.00372527
cg10476206	rs143816204:12547010:ACT:A	3565	30	32	0.15534	0.00018324	0.181815	0.0468034	0.0195491
cg10476206	rs17492457:12547322:A:T	3877	30	32	0.15534	0.000187623	0.181497	0.0468013	0.0199038
cg10476206	rs113544193:12548182:C:T	4737	34	36	0.174757	0.000347742	0.169955	0.0458987	0.0308631
cg24088561	rs2249796:12596669:A:G	-5489	15	16	0.0776699	0.000224604	-0.173358	0.0452929	0.0226477
cg24088561	rs2815623:12600064:T:C	-2094	14	15	0.0728155	0.000368099	-0.169584	0.0460026	0.0321119
cg24088561	rs2768350:12602118:G:A	-40	14	15	0.0728155	0.000380628	-0.169304	0.0460475	0.0328561
cg24088561	rs2648709:12603575:A:C	1417	14	15	0.0728155	0.000379299	-0.169134	0.0459888	0.0327737
cg24088561	rs11257892:12606052:G:C	3894	14	15	0.0728155	0.000314563	-0.170915	0.0458014	0.0287449
cg24088561	rs2768359:12608281:T:C	6123	15	16	0.0776699	0.000290768	-0.170853	0.04551	0.0272101
cg24088561	rs2768358:12609157:C:T	6999	15	16	0.0776699	0.00028849	-0.170719	0.0454471	0.0270643
cg01167366	rs58227987:12733551:C:T	-8620	53	64	0.31068	0.000290569	0.240281	0.0640003	0.0271962
cg01167366	rs111788475:12735236:C:T	-6935	50	60	0.291262	0.000151348	0.253929	0.0644838	0.0170366
cg01167366	rs7074358:12738278:G:A	-3893	57	67	0.325243	0.000127212	0.261723	0.0656634	0.0150574
cg16123687	rs7074358:12738278:G:A	-6349	57	67	0.325243	0.000116315	0.323642	0.0807007	0.0140922
cg04836423	rs151112881:12771928:T:TCGTCC	-113	52	64	0.31068	0.000460842	0.0897857	0.0247955	0.0376176
cg03482946	rs1644395:12873463:A:G	-2775	53	69	0.334951	0.000479615	-0.127411	0.0353001	0.0386587
cg00098692	rs60163353:12872824:CAGTCATGGGAAGTCCTGTTGGTTG:C	-5090	59	80	0.38835	3.94396e-06	0.410221	0.0840328	0.00117915
cg00098692	rs2431623:12872880:A:G	-5034	59	80	0.38835	3.89672e-06	0.4102	0.0839779	0.00116837
cg00098692	rs1757063	-4562	49	62	0.300971	3.93265e-07	0.481649	0.088736	0.000219805
cg00098692	rs1644395:12873463:A:G	-4451	53	69	0.334951	3.61008e-07	0.465542	0.0854581	0.000206671
cg00098692	rs2431637:12875263:G:A	-2651	57	75	0.364078	1.46976e-07	0.471816	0.0834668	0.000106558
cg00098692	rs2431634:12875491:A:G	-2423	72	101	0.490291	5.2694e-08	0.470917	0.0800507	5.05802e-05
cg00098692	rs1047721:12876247:T:C	-1667	72	101	0.490291	4.91393e-08	0.472525	0.0801128	4.80137e-05
cg00098692	rs2482073:12876850:A:G	-1064	50	64	0.31068	1.42801e-07	0.490301	0.0866369	0.000104258
cg00098692	rs15980	-907	69	91	0.441748	6.4206e-09	0.521175	0.0821645	1.10852e-05
cg00098692	rs7500:12877510:C:T	-404	69	91	0.441748	6.39979e-09	0.521227	0.0821636	1.10593e-05
cg00098692	rs1644402:12877584:T:C	-330	69	90	0.436893	3.77068e-09	0.533961	0.0826905	7.75422e-06
cg00098692	rs1757067:12877675:A:T	-239	69	90	0.436893	3.77068e-09	0.533961	0.0826905	7.75422e-06
cg00098692	rs1757068:12877925:A:G	11	69	92	0.446602	1.47358e-09	0.533317	0.0801106	3.94473e-06
cg00098692	rs1644403:12878020:C:A	106	69	90	0.436893	3.77068e-09	0.533961	0.0826905	7.75422e-06
cg00098692	rs1757069:12878043:G:A	129	69	90	0.436893	3.77068e-09	0.533961	0.0826905	7.75422e-06
cg00098692	rs1644404:12878175:T:C	261	69	90	0.436893	3.77068e-09	0.533961	0.0826905	7.75422e-06
cg00098692	rs1757070:12878354:G:C	440	49	61	0.296117	2.50807e-07	0.497646	0.089971	0.000157698
cg00098692	rs1644405:12878462:C:G	548	69	90	0.436893	3.75798e-09	0.534014	0.0826896	7.73794e-06
cg00098692	rs58868219:12878484:ACTCT:A	570	69	90	0.436893	3.75798e-09	0.534014	0.0826896	7.73794e-06
cg00098692	rs2112646:12878563:G:A	649	69	90	0.436893	3.68494e-09	0.534272	0.0826757	7.62233e-06
cg00098692	rs76139027:12879011:ATAC:A	1097	69	91	0.441748	1.00898e-09	0.543757	0.0807091	3.04955e-06
cg00098692	rs1644407:12879098:T:C	1184	69	91	0.441748	1.00898e-09	0.543757	0.0807091	3.04955e-06
cg00098692	rs1644408:12879199:C:A	1285	69	91	0.441748	1.00898e-09	0.543757	0.0807091	3.04955e-06
cg00098692	rs1757071:12879293:G:A	1379	69	91	0.441748	9.50051e-10	0.544798	0.0807118	2.9227e-06
cg00098692	rs1757072:12879369:A:G	1455	52	64	0.31068	1.96544e-07	0.505739	0.090524	0.000131961
cg00098692	rs1757073:12879490:G:A	1576	69	91	0.441748	1.00567e-09	0.543803	0.0807077	3.04468e-06
cg00098692	rs35675643:12879945:C:CA	2031	69	92	0.446602	1.75138e-09	0.532128	0.0803737	4.47706e-06
cg00098692	rs2431633:12879969:G:A	2055	68	90	0.436893	7.04163e-10	0.544516	0.0799242	2.36205e-06
cg00098692	rs1644410:12880200:T:C	2286	69	92	0.446602	1.74939e-09	0.531311	0.0802475	4.4732e-06
cg00098692	rs1757074:12880224:T:C	2310	69	92	0.446602	1.74939e-09	0.531311	0.0802475	4.4732e-06
cg00098692	rs1757075:12880428:G:A	2514	64	81	0.393204	1.38213e-08	0.528009	0.0854792	1.91398e-05
cg00098692	rs1757076:12880490:C:T	2576	69	92	0.446602	1.72983e-09	0.531702	0.0802775	4.43106e-06
cg00098692	rs1757077:12880555:G:A	2641	69	92	0.446602	1.74414e-09	0.531353	0.080246	4.46348e-06
cg00098692	rs2482072:12880984:C:A	3070	63	87	0.42233	5.27053e-05	0.359479	0.0851095	0.0079507
cg00098692	rs2431631:12881018:C:T	3104	69	92	0.446602	1.74414e-09	0.531353	0.080246	4.46348e-06
cg00098692	rs1644411:12881665:C:T	3751	42	51	0.247573	1.91356e-06	0.491163	0.0971382	0.000702446
cg00098692	rs1627707	3941	59	78	0.378641	1.2987e-07	0.470561	0.0828349	9.66923e-05
cg00098692	rs1644412:12882041:C:T	4127	52	64	0.31068	1.93626e-07	0.505979	0.0905118	0.000130677
cg00098692	rs1644413:12883313:G:T	5399	42	51	0.247573	1.92651e-06	0.491369	0.09721	0.000705983
cg00098692	rs1644414:12883397:T:C	5483	42	51	0.247573	1.92651e-06	0.491369	0.09721	0.000705983
cg00098692	rs1644415:12884401:C:G	6487	53	66	0.320388	2.13251e-08	0.533098	0.0876471	2.608e-05
cg27497962	rs60163353:12872824:CAGTCATGGGAAGTCCTGTTGGTTG:C	-5144	59	80	0.38835	1.30663e-06	0.59517	0.11563	0.000528581
cg27497962	rs2431623:12872880:A:G	-5088	59	80	0.38835	1.29175e-06	0.595098	0.115556	0.00052448
cg27497962	rs1757063	-4616	49	62	0.300971	6.32872e-08	0.708327	0.121248	5.77338e-05
cg27497962	rs1644395:12873463:A:G	-4505	53	69	0.334951	8.48744e-08	0.676968	0.117196	7.08165e-05
cg27497962	rs2431637:12875263:G:A	-2705	57	75	0.364078	2.37359e-07	0.646439	0.116606	0.000151467
cg27497962	rs2431634:12875491:A:G	-2477	72	101	0.490291	8.21593e-09	0.687731	0.10934	1.31486e-05
cg27497962	rs1047721:12876247:T:C	-1721	72	101	0.490291	7.14927e-09	0.691086	0.109351	1.19413e-05
cg27497962	rs2482073:12876850:A:G	-1118	50	64	0.31068	2.12676e-08	0.719531	0.118287	2.60185e-05
cg27497962	rs15980	-961	69	91	0.441748	1.89504e-09	0.745697	0.112917	4.7312e-06
cg27497962	rs7500:12877510:C:T	-458	69	91	0.441748	1.90032e-09	0.745665	0.112922	4.74109e-06
cg27497962	rs1644402:12877584:T:C	-384	69	90	0.436893	1.0578e-09	0.764104	0.113583	3.14429e-06
cg27497962	rs1757067:12877675:A:T	-293	69	90	0.436893	1.0578e-09	0.764104	0.113583	3.14429e-06
cg27497962	rs1757068:12877925:A:G	-43	69	92	0.446602	6.24368e-10	0.75547	0.110479	2.18153e-06
cg27497962	rs1644403:12878020:C:A	52	69	90	0.436893	1.0578e-09	0.764104	0.113583	3.14429e-06
cg27497962	rs1757069:12878043:G:A	75	69	90	0.436893	1.0578e-09	0.764104	0.113583	3.14429e-06
cg27497962	rs1644404:12878175:T:C	207	69	90	0.436893	1.0578e-09	0.764104	0.113583	3.14429e-06
cg27497962	rs1757070:12878354:G:C	386	49	61	0.296117	2.51002e-08	0.739927	0.122371	2.91938e-05
cg27497962	rs1644405:12878462:C:G	494	69	90	0.436893	1.06083e-09	0.764072	0.113588	3.15192e-06
cg27497962	rs58868219:12878484:ACTCT:A	516	69	90	0.436893	1.06083e-09	0.764072	0.113588	3.15192e-06
cg27497962	rs2112646:12878563:G:A	595	69	90	0.436893	1.04048e-09	0.76441	0.11357	3.11773e-06
cg27497962	rs76139027:12879011:ATAC:A	1043	69	91	0.441748	2.68843e-10	0.777189	0.110803	1.16871e-06
cg27497962	rs1644407:12879098:T:C	1130	69	91	0.441748	2.68843e-10	0.777189	0.110803	1.16871e-06
cg27497962	rs1644408:12879199:C:A	1231	69	91	0.441748	2.68843e-10	0.777189	0.110803	1.16871e-06
cg27497962	rs1757071:12879293:G:A	1325	69	91	0.441748	2.47431e-10	0.778954	0.110783	1.09757e-06
cg27497962	rs1757072:12879369:A:G	1401	52	64	0.31068	1.578e-07	0.708067	0.125618	0.000112542
cg27497962	rs1757073:12879490:G:A	1522	69	91	0.441748	2.69715e-10	0.77715	0.110809	1.16978e-06
cg27497962	rs35675643:12879945:C:CA	1977	69	92	0.446602	4.97133e-10	0.760282	0.110412	1.857e-06
cg27497962	rs2431633:12879969:G:A	2001	68	90	0.436893	5.43706e-10	0.761325	0.110865	1.9777e-06
cg27497962	rs1644410:12880200:T:C	2232	69	92	0.446602	4.97453e-10	0.759086	0.11024	1.85726e-06
cg27497962	rs1757074:12880224:T:C	2256	69	92	0.446602	4.97453e-10	0.759086	0.11024	1.85726e-06
cg27497962	rs1757075:12880428:G:A	2460	64	81	0.393204	4.9061e-08	0.709786	0.120331	4.79861e-05
cg27497962	rs1757076:12880490:C:T	2522	69	92	0.446602	5.0305e-10	0.759277	0.110305	1.86939e-06
cg27497962	rs1757077:12880555:G:A	2587	69	92	0.446602	4.99103e-10	0.759042	0.110245	1.85889e-06
cg27497962	rs2482072:12880984:C:A	3016	63	87	0.42233	2.80727e-06	0.571406	0.115106	0.000922855
cg27497962	rs2431631:12881018:C:T	3050	69	92	0.446602	4.99103e-10	0.759042	0.110245	1.85889e-06
cg27497962	rs1644411:12881665:C:T	3697	42	51	0.247573	2.08951e-06	0.680743	0.135195	0.000749184
cg27497962	rs1627707	3887	59	78	0.378641	6.17741e-08	0.668762	0.11437	5.67417e-05
cg27497962	rs1644412:12882041:C:T	4073	52	64	0.31068	1.5799e-07	0.708047	0.125621	0.000112647
cg27497962	rs1644413:12883313:G:T	5345	42	51	0.247573	2.12988e-06	0.680707	0.135311	0.000759167
cg27497962	rs1644414:12883397:T:C	5429	42	51	0.247573	2.12988e-06	0.680707	0.135311	0.000759167
cg27497962	rs1644415:12884401:C:G	6433	53	66	0.320388	3.11011e-08	0.733897	0.122328	3.3986e-05
cg23361613	rs2104835:12911904:C:T	-3626	36	45	0.218447	0.000563539	-0.112135	0.0314821	0.0431386
cg23361613	rs7073964:12913639:T:C	-1891	34	38	0.184466	0.000105824	-0.145022	0.0359299	0.0131562
cg23361613	rs4750277	-1009	37	43	0.208738	0.00044328	-0.12319	0.0339142	0.0366194
cg23361613	rs10795989:12919000:T:C	3470	67	92	0.446602	0.000129862	0.106328	0.0267145	0.0152783
cg06702543	rs74120710:12937634:C:T	-7584	17	19	0.092233	1.90804e-05	-0.653634	0.145632	0.00375685
cg06702543	rs74120711:12937666:A:C	-7552	17	19	0.092233	1.70845e-05	-0.656902	0.145446	0.00346066
cg06702543	rs74120712:12937708:C:T	-7510	17	19	0.092233	1.88521e-05	-0.654274	0.145674	0.00372304
cg06702543	rs7096623:12943483:C:T	-1735	15	17	0.0825243	1.40319e-05	-0.676293	0.1481	0.00300457
cg06702543	rs4237429:12944793:C:G	-425	19	21	0.101942	1.90852e-08	-0.794561	0.130115	2.39755e-05
cg06702543	rs11369051:12944829:A:AC	-389	19	21	0.101942	1.89617e-08	-0.794732	0.130112	2.38704e-05
cg06702543	rs74120713:12944903:A:G	-315	14	16	0.0776699	1.09674e-06	-0.763811	0.14721	0.00046605
cg06702543	rs2026307:12944980:C:A	-238	19	21	0.101942	1.8585e-08	-0.794549	0.129989	2.34641e-05
cg06702543	rs1475611:12945203:T:C	-15	19	21	0.101942	1.74751e-08	-0.796137	0.129963	2.2541e-05
cg06702543	rs7089884:12945455:A:T	237	19	21	0.101942	1.62973e-08	-0.797208	0.129815	2.14078e-05
cg06702543	rs11258054:12945591:C:A	373	14	16	0.0776699	9.47466e-07	-0.767322	0.14691	0.000421406
cg06702543	rs35280879:12945851:GA:G	633	19	21	0.101942	1.50699e-08	-0.79822	0.129619	2.04064e-05
cg06702543	rs11258056:12945966:C:T	748	19	21	0.101942	1.50076e-08	-0.798293	0.129612	2.03525e-05
cg06702543	rs12259118:12946435:C:T	1217	16	18	0.0873786	1.12577e-05	-0.669256	0.144796	0.00255376
cg06702543	rs59486331:12947351:C:A	2133	16	18	0.0873786	1.06959e-05	-0.670068	0.14457	0.00245841
cg06702543	rs1929382:12947858:C:T	2640	16	18	0.0873786	1.01804e-05	-0.671028	0.144391	0.00237013
cg06702543	rs1929381:12947903:C:A	2685	16	18	0.0873786	1.01804e-05	-0.671028	0.144391	0.00237013
cg06702543	rs2225465:12948067:C:G	2849	16	18	0.0873786	1.01073e-05	-0.671143	0.144359	0.0023576
cg06702543	rs12266955	3861	21	24	0.116505	0.000261426	-0.494608	0.130693	0.0252115
cg06702543	rs12268570:12949367:G:A	4149	16	18	0.0873786	9.5749e-06	-0.67206	0.144137	0.00226094
cg06702543	rs12268676:12949508:G:A	4290	16	18	0.0873786	9.5749e-06	-0.67206	0.144137	0.00226094
cg06702543	rs7908635	4833	17	19	0.092233	3.37412e-06	-0.690458	0.140347	0.00105555
cg06702543	rs7915276:12950199:T:C	4981	22	25	0.121359	0.00010409	-0.518385	0.128289	0.0130013
cg06702543	rs7915496:12950338:T:C	5120	21	24	0.116505	0.000260448	-0.49495	0.130747	0.0251423
cg06702543	rs12220846:12950670:T:C	5452	21	24	0.116505	0.000255162	-0.495489	0.130688	0.0247776
cg06702543	rs12220856:12950764:T:C	5546	21	24	0.116505	0.000261823	-0.494871	0.130778	0.0252389
cg06702543	rs12220635:12951056:A:G	5838	22	25	0.121359	0.000553811	-0.465223	0.130423	0.0426279
cg06702543	rs7899716:12951508:G:T	6290	23	26	0.126214	0.000228886	-0.489668	0.128113	0.0229515
cg06702543	rs12243442:12951727:G:A	6509	18	20	0.0970874	8.45388e-06	-0.656161	0.139795	0.00206111
cg06702543	rs10906250:12952406:C:A	7188	18	20	0.0970874	8.2594e-06	-0.657525	0.139912	0.0020262
cg06702543	rs7909672:12953643:C:T	8425	16	18	0.0873786	3.03871e-06	-0.713997	0.144387	0.000976893
cg06702543	rs7898221:12953911:T:C	8693	18	21	0.101942	0.000202121	-0.526928	0.13661	0.020982
cg06702543	rs56029744:12954662:G:T	9444	14	16	0.0776699	5.81326e-07	-0.783082	0.146718	0.000292573
cg06702543	rs7902554:12954895:T:G	9677	14	16	0.0776699	5.91398e-07	-0.782931	0.1468	0.000296088
cg06702543	rs57642391:12955215:G:A	9997	14	16	0.0776699	5.3163e-07	-0.785718	0.146641	0.000273667
cg04260608	rs4237429:12944793:C:G	-837	19	21	0.101942	2.19816e-06	-0.409525	0.0815284	0.000776778
cg04260608	rs11369051:12944829:A:AC	-801	19	21	0.101942	2.17764e-06	-0.409691	0.0815248	0.000771309
cg04260608	rs74120713:12944903:A:G	-727	14	16	0.0776699	5.05893e-05	-0.387026	0.0913965	0.00770918
cg04260608	rs2026307:12944980:C:A	-650	19	21	0.101942	2.09819e-06	-0.409962	0.0814344	0.000751311
cg04260608	rs1475611:12945203:T:C	-427	19	21	0.101942	2.0227e-06	-0.410695	0.0814378	0.000731581
cg04260608	rs7089884:12945455:A:T	-175	19	21	0.101942	1.893e-06	-0.411534	0.0813484	0.00069675
cg04260608	rs11258054:12945591:C:A	-39	14	16	0.0776699	4.39218e-05	-0.38967	0.0912168	0.00694211
cg04260608	rs35280879:12945851:GA:G	221	19	21	0.101942	1.7382e-06	-0.412546	0.081221	0.00065406
cg04260608	rs11258056:12945966:C:T	336	19	21	0.101942	1.72464e-06	-0.41266	0.0812136	0.000650365
cg04260608	rs12259118:12946435:C:T	805	16	18	0.0873786	0.000559661	-0.320477	0.0899228	0.0429374
cg04260608	rs59486331:12947351:C:A	1721	16	18	0.0873786	0.000528871	-0.321463	0.0897786	0.0413138
cg04260608	rs1929382:12947858:C:T	2228	16	18	0.0873786	0.000507493	-0.322183	0.0896754	0.0401667
cg04260608	rs1929381:12947903:C:A	2273	16	18	0.0873786	0.000507493	-0.322183	0.0896754	0.0401667
cg04260608	rs2225465:12948067:C:G	2437	16	18	0.0873786	0.000502632	-0.32236	0.089654	0.0399063
cg04260608	rs12268570:12949367:G:A	3737	16	18	0.0873786	0.000478397	-0.323179	0.0895206	0.03859
cg04260608	rs12268676:12949508:G:A	3878	16	18	0.0873786	0.000478397	-0.323179	0.0895206	0.03859
cg04260608	rs7908635	4421	17	19	0.092233	0.000184661	-0.338785	0.0872597	0.0196652
cg04260608	rs7915276:12950199:T:C	4569	22	25	0.121359	0.000673867	-0.274205	0.0781491	0.0486126
cg04260608	rs12243442:12951727:G:A	6097	18	20	0.0970874	0.000321601	-0.322636	0.0866064	0.0291862
cg04260608	rs10906250:12952406:C:A	6776	18	20	0.0970874	0.000299404	-0.32454	0.0866408	0.0277739
cg04260608	rs7909672:12953643:C:T	8013	16	18	0.0873786	0.00021948	-0.345084	0.0900062	0.0222727
cg04260608	rs56029744:12954662:G:T	9032	14	16	0.0776699	2.79517e-05	-0.40008	0.0911348	0.00498649
cg04260608	rs7902554:12954895:T:G	9265	14	16	0.0776699	2.83725e-05	-0.39994	0.0911834	0.00504121
cg04260608	rs57642391:12955215:G:A	9585	14	16	0.0776699	2.63607e-05	-0.401373	0.0911146	0.00477605
cg05009817	rs7096623:12943483:C:T	-8526	15	17	0.0825243	1.30706e-07	-0.34711	0.0611189	9.71846e-05
cg05009817	rs4237429:12944793:C:G	-7216	19	21	0.101942	1.82856e-07	-0.321563	0.0573891	0.000125566
cg05009817	rs11369051:12944829:A:AC	-7180	19	21	0.101942	1.81153e-07	-0.321671	0.0573865	0.000124785
cg05009817	rs74120713:12944903:A:G	-7106	14	16	0.0776699	6.7193e-09	-0.38309	0.0604885	1.14664e-05
cg05009817	rs2026307:12944980:C:A	-7029	19	21	0.101942	1.69613e-07	-0.322081	0.0573069	0.000119024
cg05009817	rs1475611:12945203:T:C	-6806	19	21	0.101942	1.5902e-07	-0.322845	0.0572938	0.000113236
cg05009817	rs7089884:12945455:A:T	-6554	19	21	0.101942	1.48466e-07	-0.323372	0.0572294	0.000107401
cg05009817	rs11258054:12945591:C:A	-6418	14	16	0.0776699	5.15038e-09	-0.385313	0.0602948	9.51315e-06
cg05009817	rs35280879:12945851:GA:G	-6158	19	21	0.101942	1.32982e-07	-0.32421	0.0571258	9.84756e-05
cg05009817	rs11258056:12945966:C:T	-6043	19	21	0.101942	1.31996e-07	-0.324277	0.0571208	9.78866e-05
cg05009817	rs12259118:12946435:C:T	-5574	16	18	0.0873786	8.13281e-08	-0.344886	0.0596077	6.86165e-05
cg05009817	rs12570009:12947039:G:C	-4970	54	67	0.325243	0.000674131	-0.141122	0.0402215	0.0486222
cg05009817	rs59486331:12947351:C:A	-4658	16	18	0.0873786	7.20135e-08	-0.345729	0.0594737	6.30669e-05
cg05009817	rs1929382:12947858:C:T	-4151	16	18	0.0873786	6.64992e-08	-0.346254	0.0593824	5.95185e-05
cg05009817	rs1929381:12947903:C:A	-4106	16	18	0.0873786	6.64992e-08	-0.346254	0.0593824	5.95185e-05
cg05009817	rs2225465:12948067:C:G	-3942	16	18	0.0873786	6.53784e-08	-0.346371	0.0593638	5.88499e-05
cg05009817	rs7918602:12948440:C:G	-3569	60	76	0.368932	0.000307734	-0.145104	0.0388191	0.0283069
cg05009817	rs12266955	-2930	21	24	0.116505	1.2853e-07	-0.298143	0.0524619	9.59065e-05
cg05009817	rs12268570:12949367:G:A	-2642	16	18	0.0873786	5.95784e-08	-0.346931	0.0592496	5.516e-05
cg05009817	rs12268676:12949508:G:A	-2501	16	18	0.0873786	5.95784e-08	-0.346931	0.0592496	5.516e-05
cg05009817	rs12263560:12949622:T:C	-2387	58	72	0.349515	0.000342754	-0.147325	0.0397425	0.0305447
cg05009817	rs7908635	-1958	17	19	0.092233	5.66611e-08	-0.341668	0.0582396	5.3229e-05
cg05009817	rs7915276:12950199:T:C	-1810	22	25	0.121359	4.69387e-08	-0.303935	0.051441	4.64207e-05
cg05009817	rs7915496:12950338:T:C	-1671	21	24	0.116505	1.22574e-07	-0.298701	0.0524612	9.26255e-05
cg05009817	rs12220846:12950670:T:C	-1339	21	24	0.116505	1.2456e-07	-0.29848	0.0524558	9.36962e-05
cg05009817	rs12220856:12950764:T:C	-1245	21	24	0.116505	1.21653e-07	-0.298824	0.0524672	9.21005e-05
cg05009817	rs12220635:12951056:A:G	-953	22	25	0.121359	8.10296e-08	-0.299516	0.0517588	6.8461e-05
cg05009817	rs7899716:12951508:G:T	-501	23	26	0.126214	2.65534e-08	-0.306014	0.0507131	3.04149e-05
cg05009817	rs12243442:12951727:G:A	-282	18	20	0.0970874	1.15193e-08	-0.352033	0.0566274	1.67184e-05
cg05009817	rs10906250:12952406:C:A	397	18	20	0.0970874	1.03784e-08	-0.353334	0.0566305	1.5428e-05
cg05009817	rs7909672:12953643:C:T	1634	16	18	0.0873786	2.15547e-08	-0.361267	0.0594191	2.62788e-05
cg05009817	rs7898221:12953911:T:C	1902	18	21	0.101942	1.94835e-07	-0.308439	0.055189	0.000131226
cg05009817	rs56029744:12954662:G:T	2653	14	16	0.0776699	1.96354e-09	-0.395362	0.0599359	4.85891e-06
cg05009817	rs7902554:12954895:T:G	2886	14	16	0.0776699	1.91966e-09	-0.395718	0.0599463	4.77884e-06
cg05009817	rs57642391:12955215:G:A	3206	14	16	0.0776699	1.90173e-09	-0.395778	0.0599373	4.74351e-06
cg05009817	rs11528649:12955811:C:A	3802	14	16	0.0776699	1.03879e-09	-0.406882	0.060448	3.11353e-06
cg05009817	rs11528650:12956756:C:T	4747	14	16	0.0776699	1.96916e-10	-0.431515	0.0609589	9.25103e-07
cg14458563	rs139870093:13114673:TTTTTC:T	-2025	26	30	0.145631	1.10954e-05	0.595607	0.12876	0.00252668
cg14458563	rs72478299:13114703:T:C	-1995	26	30	0.145631	1.10858e-05	0.595532	0.128738	0.00252515
cg14458563	rs370689313:13114863:C:T	-1835	26	30	0.145631	1.47442e-05	0.590112	0.129583	0.00311497
cg14458563	rs56170303:13115006:A:G	-1692	26	30	0.145631	1.06125e-05	0.596406	0.128622	0.00244477
cg14458563	rs56026821:13115221:C:G	-1477	26	30	0.145631	1.04851e-05	0.596669	0.128595	0.00242311
cg14458563	rs139769546:13115370:G:GAAAACAC	-1328	26	30	0.145631	1.04851e-05	0.596669	0.128595	0.00242311
cg14458563	rs55990072:13115414:A:C	-1284	26	30	0.145631	1.02496e-05	0.597069	0.128523	0.00238264
cg14458563	rs55642878:13115443:A:C	-1255	26	30	0.145631	1.02496e-05	0.597069	0.128523	0.00238264
cg14458563	rs55800322:13115473:A:G	-1225	26	30	0.145631	1.02496e-05	0.597069	0.128523	0.00238264
cg14458563	rs61851394:13115604:C:A	-1094	26	30	0.145631	1.02496e-05	0.597069	0.128523	0.00238264
cg14458563	rs61851395:13115776:G:C	-922	26	30	0.145631	1.02612e-05	0.594241	0.127922	0.00238444
cg14458563	rs72779542:13115802:A:T	-896	26	30	0.145631	1.02612e-05	0.594241	0.127922	0.00238444
cg14458563	rs4750306	-811	26	30	0.145631	1.02612e-05	0.594241	0.127922	0.00238444
cg14458563	rs4750308:13116699:C:A	1	34	39	0.18932	4.09871e-08	0.673237	0.113369	4.21097e-05
cg14458563	rs12416459:13116731:C:A	33	26	30	0.145631	1.23075e-05	0.593042	0.128933	0.00272765
cg14458563	rs61851396:13117093:G:A	395	26	30	0.145631	1.17724e-05	0.592636	0.128532	0.00263993
cg14458563	rs7098306:13117415:T:C	717	36	41	0.199029	3.60466e-07	0.620465	0.113889	0.000206412
cg14458563	rs34089311:13117447:GT:G	749	37	42	0.203883	8.45612e-07	0.603091	0.114879	0.000387047
cg14458563	rs7098634:13117693:T:C	995	36	41	0.199029	3.65858e-07	0.62006	0.113887	0.00020867
cg14458563	rs10796012:13117846:T:C	1148	36	41	0.199029	3.65858e-07	0.62006	0.113887	0.00020867
cg14458563	rs10796013:13118069:G:A	1371	36	41	0.199029	3.65858e-07	0.62006	0.113887	0.00020867
cg14458563	rs10796014:13118315:T:C	1617	36	41	0.199029	3.65858e-07	0.62006	0.113887	0.00020867
cg14458563	rs10752282:13118603:C:A	1905	36	41	0.199029	3.65858e-07	0.62006	0.113887	0.00020867
cg14458563	rs10752283:13118693:A:G	1995	36	41	0.199029	3.65858e-07	0.62006	0.113887	0.00020867
cg14458563	rs61851397:13118724:C:T	2026	26	30	0.145631	1.18518e-05	0.592513	0.128552	0.00265144
cg14458563	rs10796016:13118984:C:A	2286	36	41	0.199029	3.64977e-07	0.620041	0.113871	0.000208368
cg14458563	rs10906295:13119229:A:G	2531	36	41	0.199029	3.70463e-07	0.619633	0.113868	0.000210409
cg14458563	rs10906296:13119270:T:C	2572	36	41	0.199029	3.68765e-07	0.619618	0.113844	0.000209809
cg14458563	rs185000304:13119461:T:C	2763	36	41	0.199029	3.70463e-07	0.619633	0.113868	0.000210409
cg14458563	rs139330109:13119471:G:A	2773	36	41	0.199029	3.70463e-07	0.619633	0.113868	0.000210409
cg14458563	rs143694936:13119801:G:A	3103	36	41	0.199029	3.92963e-07	0.618716	0.113985	0.000219676
cg14458563	rs77538812:13119825:G:C	3127	36	41	0.199029	3.92963e-07	0.618716	0.113985	0.000219676
cg14458563	rs4582866:13120826:C:T	4128	36	41	0.199029	3.75185e-07	0.619199	0.11385	0.00021238
cg14458563	rs4282892:13120858:C:T	4160	36	41	0.199029	3.75185e-07	0.619199	0.11385	0.00021238
cg14458563	rs7083284:13121188:T:A	4490	36	41	0.199029	3.75185e-07	0.619199	0.11385	0.00021238
cg14458563	rs7079763:13121270:A:G	4572	36	41	0.199029	3.75185e-07	0.619199	0.11385	0.00021238
cg14458563	rs7079869	4654	36	41	0.199029	3.75185e-07	0.619199	0.11385	0.00021238
cg14458563	rs36060567:13121450:CA:C	4752	36	41	0.199029	3.99535e-07	0.61917	0.114149	0.000222382
cg14458563	rs17152817:13121925:G:A	5227	25	29	0.140777	1.93024e-05	0.596873	0.133073	0.0037889
cg14458563	rs7088658:13122538:T:C	5840	23	27	0.131068	0.000202278	0.525339	0.136205	0.0209941
cg14458563	rs570158:13122809:T:C	6111	31	35	0.169903	4.85881e-05	0.538993	0.126963	0.007482
cg14458563	rs4748019:13123650:C:T	6952	33	38	0.184466	9.95636e-06	0.556868	0.119682	0.00233081
cg14458563	rs12571458:13125058:T:G	8360	23	27	0.131068	0.000227749	0.52114	0.136297	0.0228715
cg14458563	rs7099921:13126019:A:G	9321	22	26	0.126214	0.000300574	0.525541	0.140343	0.0278462
cg19018267	rs7920056:13334712:C:T	-6621	65	86	0.417476	8.6417e-05	0.19662	0.0480582	0.0113719
cg19018267	rs10612459:13337831:CAAA:C	-3502	72	101	0.490291	8.39499e-05	0.190319	0.0464293	0.0111288
cg19018267	rs504044:13338067:T:C	-3266	72	101	0.490291	9.25999e-05	0.188189	0.0462089	0.0119514
cg19018267	rs505081	-3131	72	101	0.490291	8.8884e-05	0.188306	0.0461121	0.0116016
cg19018267	rs2484527:13338301:G:A	-3032	72	101	0.490291	8.72876e-05	0.188716	0.0461571	0.0114556
cg19018267	rs7896826:13339681:C:T	-1652	54	74	0.359223	2.61174e-06	0.222521	0.0446684	0.000875737
cg19018267	rs7916926:13340293:A:G	-1040	56	76	0.368932	8.07464e-07	0.233684	0.0444214	0.000374642
cg19018267	rs10796054:13340339:G:A	-994	55	75	0.364078	1.25743e-06	0.229061	0.0444237	0.00051476
cg19018267	rs10906342:13340375:T:G	-958	56	76	0.368932	8.15828e-07	0.233539	0.0444144	0.000376886
cg19018267	rs3802586:13341378:C:T	45	55	75	0.364078	1.43518e-06	0.227043	0.0443018	0.000566973
cg19018267	rs1058596:13341579:G:C	246	55	75	0.364078	1.41195e-06	0.227117	0.0442827	0.00056006
cg19018267	rs2399959:13349398:C:T	8065	62	81	0.393204	9.42213e-07	0.240659	0.0460646	0.000419745
cg19018267	rs10737067:13349610:T:C	8277	72	99	0.480583	0.00018397	0.186039	0.0479044	0.0196087
cg19018267	rs147709771:13350797:T:C	9464	72	98	0.475728	0.000146033	0.189827	0.0480848	0.0166133
cg19018267	rs186957328:13350799:G:A	9466	71	96	0.466019	0.000177079	0.187517	0.0481529	0.019073
cg24974340	rs1890876:13482731:G:A	-9287	54	64	0.31068	0.00054836	-0.205514	0.0575679	0.0423447
cg24974340	rs4750358:13485445:C:T	-6573	54	64	0.31068	0.00063133	-0.20434	0.0579166	0.0465054
cg24974340	rs10906375:13498371:A:G	6353	55	65	0.315534	0.000655269	-0.203867	0.0579646	0.0476749
cg24974340	rs10906376:13499253:C:A	7235	55	65	0.315534	0.000628834	-0.204455	0.0579299	0.0463906
cg23456689	rs4750363:13506414:C:A	-9802	45	48	0.23301	0.000295236	0.0678157	0.018085	0.0274926
cg23456689	rs7894679:13506516:C:T	-9700	46	49	0.237864	0.000405472	0.0664743	0.0181705	0.0343905
cg23456689	rs10796084:13507429:G:A	-8787	44	47	0.228155	0.000348356	0.0671382	0.0181341	0.0309023
cg23456689	rs10906379:13508295:T:C	-7921	44	47	0.228155	0.000373552	0.0667618	0.0181312	0.0324406
cg23456689	rs10906380:13508357:T:C	-7859	44	47	0.228155	0.000372658	0.0667623	0.0181279	0.0323819
cg23456689	rs2185407:13509708:T:C	-6508	44	47	0.228155	0.000382021	0.0666521	0.0181334	0.0329444
cg23456689	rs5783325:13511365:CA:C	-4851	44	47	0.228155	0.000397332	0.0664641	0.0181385	0.0338945
cg23456689	rs10906381:13514509:T:C	-1707	44	47	0.228155	0.000394581	0.0664911	0.0181358	0.0337257
cg23456689	rs10737072:13516553:T:C	337	44	47	0.228155	0.000402276	0.066397	0.0181379	0.0341902
cg23456689	rs10906384:13517919:C:T	1703	44	47	0.228155	0.000409601	0.0663018	0.0181379	0.0346461
cg23456689	rs4750369	7547	45	48	0.23301	0.000370609	0.0666301	0.0180842	0.0322571
cg23456689	rs4748039:13525258:A:G	9042	44	47	0.228155	0.000437354	0.065436	0.017995	0.0362875
cg19695507	rs10906385:13517978:G:C	-8216	64	84	0.407767	0.00021519	0.227662	0.0592937	0.0219571
cg19695507	rs10906386:13520163:C:T	-6031	66	85	0.412621	0.000256867	0.22975	0.0606282	0.0249006
cg19695507	rs10906387:13521093:G:A	-5101	66	88	0.427184	0.000394561	0.215766	0.0588514	0.0337246
cg19695507	rs10906388:13521095:C:T	-5099	66	85	0.412621	0.000330399	0.225871	0.060758	0.0297425
cg19695507	rs58818716:13521808:T:TGTCCTTC	-4386	66	88	0.427184	0.000310118	0.21942	0.0587354	0.0284596
cg19695507	rs10906390:13523864:G:A	-2330	65	84	0.407767	0.000274257	0.227537	0.0603407	0.0260925
cg19695507	rs11258412:13527044:C:G	850	66	88	0.427184	0.00035114	0.215818	0.058329	0.0310736
cg19695507	rs36022989:13527689:T:C	1495	64	81	0.393204	0.000348142	0.22619	0.0610912	0.0308899
cg19695507	rs2399971	3168	64	80	0.38835	0.000173964	0.239994	0.0615503	0.0188261
cg24867665	rs10796088:13545481:C:G	-614	22	23	0.11165	6.7963e-05	-0.19491	0.0468991	0.00958422
cg24867665	rs7096196:13545584:G:A	-511	59	76	0.368932	4.79538e-06	0.133169	0.0275491	0.00135685
cg24867665	rs1890877:13546074:G:A	-21	58	72	0.349515	2.13747e-06	0.144845	0.0287972	0.000761407
cg24867665	rs6602662:13547709:A:G	1614	58	72	0.349515	2.17217e-06	0.144782	0.0288068	0.000769788
cg17624339	rs9787567:13707100:G:C	-4250	57	67	0.325243	1.30317e-05	0.219549	0.0478823	0.00284558
cg17624339	rs7906964	-2468	74	90	0.436893	0.000543464	-0.176966	0.0495343	0.0420952
cg17624339	rs10796110	-1924	57	67	0.325243	1.50197e-05	0.217729	0.0478607	0.00315673
cg17624339	rs7093256:13710836:C:T	-514	60	71	0.34466	2.59418e-05	0.21196	0.0480713	0.00471656
cg17624339	rs7093277:13710897:C:T	-453	60	71	0.34466	2.62817e-05	0.21181	0.0480738	0.00476431
cg17624339	rs10752317:13711361:C:T	11	56	66	0.320388	1.62746e-05	0.217649	0.0480583	0.00334912
cg17624339	rs10796111:13711380:T:C	30	56	66	0.320388	1.64449e-05	0.217458	0.0480443	0.00336968
cg18698819	rs2077150	-1154	65	86	0.417476	4.90673e-05	0.101433	0.0239079	0.0075356
cg18698819	rs11258532:13736615:G:A	611	68	89	0.432039	7.69903e-05	0.102139	0.0247763	0.0104695
cg20304349	rs11258524:13730034:A:T	-9892	31	34	0.165049	0.000143672	-0.202056	0.0511239	0.016417
cg20304349	rs2148282:13730744:C:T	-9182	31	34	0.165049	0.000141087	-0.202273	0.051114	0.0162002
cg20304349	rs17627309:13740314:T:C	388	35	38	0.184466	0.000405468	-0.189085	0.0516856	0.0343904
cg08808795	rs2148282:13730744:C:T	-9784	31	34	0.165049	9.60724e-05	-0.263715	0.0649135	0.0122712
cg08808795	rs2077150	-5678	65	86	0.417476	7.45236e-05	0.190387	0.0460851	0.0102276
cg08808795	rs11258532:13736615:G:A	-3913	68	89	0.432039	7.56094e-05	0.196309	0.0475632	0.010338
cg08808795	rs17627309:13740314:T:C	-214	35	38	0.184466	8.42835e-05	-0.266028	0.0649159	0.011161
cg06432648	rs35976662:13818956:T:C	6884	34	38	0.184466	0.000429366	0.298495	0.0819657	0.035824
cg09923296	rs35976662:13818956:T:C	6790	34	38	0.184466	0.000193186	0.274822	0.071016	0.0203135
cg26708920	rs8181376:13821849:C:T	-4469	60	69	0.334951	2.43151e-10	0.508736	0.072315	1.08265e-06
cg26708920	rs1105872:13821981:C:A	-4337	57	68	0.330097	0.000623606	0.279013	0.0789994	0.0461316
cg26708920	rs11258605:13822397:G:A	-3921	57	65	0.315534	1.62059e-05	0.369446	0.0815569	0.00333923
cg26708920	rs2400017:13822455:A:G	-3863	57	68	0.330097	0.00061268	0.279594	0.0790462	0.0455898
cg26708920	rs1104866:13822571:C:T	-3747	57	68	0.330097	0.000608314	0.279749	0.0790426	0.0454032
cg26708920	rs11258607:13823198:G:T	-3120	54	61	0.296117	9.14405e-06	0.384061	0.0821667	0.00218349
cg26708920	rs10796127	-76	64	73	0.354369	8.89868e-11	0.526355	0.0726708	5.19712e-07
cg15642182	rs11258651	-6084	66	77	0.373786	0.000610491	0.0982429	0.0277667	0.0454971
cg15642182	rs10508467:13869090:T:C	-4882	66	77	0.373786	0.000575236	0.0990979	0.0278694	0.0437367
cg15642182	rs10906502:13869900:T:C	-4072	48	53	0.257282	1.00989e-05	-0.134142	0.028852	0.00235605
cg15642182	rs10906503	-3985	49	54	0.262136	3.77387e-06	-0.139528	0.0285193	0.00114362
cg15642182	rs4750423:13870181:G:A	-3791	49	55	0.26699	4.89497e-06	0.135858	0.0281347	0.00137782
cg15642182	rs4750424:13870390:G:A	-3582	49	55	0.26699	4.99907e-06	0.135855	0.0281642	0.00139984
cg15642182	rs4750425:13870397:G:A	-3575	49	55	0.26699	4.99907e-06	0.135855	0.0281642	0.00139984
cg15642182	rs4750426:13870445:C:T	-3527	49	55	0.26699	4.99907e-06	0.135855	0.0281642	0.00139984
cg15642182	rs4750427:13870514:T:C	-3458	49	55	0.26699	4.99907e-06	0.135855	0.0281642	0.00139984
cg15642182	rs11258659:13870747:C:G	-3225	49	55	0.26699	5.1393e-06	0.135878	0.0282086	0.00142922
cg15642182	rs11258661:13871127:G:C	-2845	49	56	0.271845	1.54307e-05	0.126025	0.0277442	0.00321914
cg15642182	rs7899777:13875590:A:G	1618	25	26	0.126214	0.00018178	-0.149425	0.0384435	0.0194362
cg24987196	rs10906533:13930400:A:G	1608	69	87	0.42233	0.000570413	-0.266597	0.0749228	0.043496
cg07629776	rs2178285:13966921:A:G	-5290	64	82	0.398058	3.62911e-07	0.88404	0.162316	0.000207485
cg07629776	rs2178286:13966936:C:A	-5275	64	82	0.398058	3.76751e-07	0.886781	0.163078	0.000213015
cg07629776	rs2797860:13967167:C:G	-5044	65	83	0.402913	5.10699e-07	-0.879402	0.16384	0.000266151
cg07629776	rs1970578:13967828:C:A	-4383	71	91	0.441748	5.45171e-07	-0.885918	0.165522	0.000278865
cg07629776	rs1539502:13968032:G:A	-4179	54	64	0.31068	2.68638e-07	-0.968972	0.175682	0.000166372
cg07629776	rs1343005	-4025	65	83	0.402913	3.46216e-07	-0.883894	0.161967	0.000201069
cg07629776	rs2797890	1974	52	61	0.296117	0.00070054	0.671155	0.191916	0.0499203
cg07629776	rs1578773:13975342:G:A	3131	42	49	0.237864	0.000647862	0.700261	0.198911	0.0473153
cg07629776	rs1857263:13975510:C:G	3299	42	49	0.237864	0.000642532	0.700778	0.198918	0.0470481
cg07629776	rs11591950:13975756:A:G	3545	42	49	0.237864	0.000515501	0.714324	0.199078	0.0406097
cg07629776	rs11591972:13975845:A:G	3634	42	49	0.237864	0.00051923	0.714119	0.199139	0.0408125
cg07629776	rs17550219:13976373:C:T	4162	38	43	0.208738	0.00020966	0.815378	0.211958	0.021545
cg07629776	rs7093834:13976742:G:A	4531	41	48	0.23301	0.000688675	0.69979	0.199812	0.0493536
cg07629776	rs7094952:13976810:C:T	4599	38	43	0.208738	0.000192527	0.818581	0.211475	0.0202617
cg07629776	rs11599099:13977477:T:G	5266	38	43	0.208738	0.000191744	0.818744	0.211455	0.0202034
cg07629776	rs11599100:13977480:T:A	5269	38	43	0.208738	0.000191744	0.818744	0.211455	0.0202034
cg26756800	rs4237438:14018768:A:C	-8250	59	72	0.349515	0.000409572	0.185309	0.050694	0.0346443
cg26756800	rs11258770:14018910:G:T	-8108	56	69	0.334951	0.000646787	0.177746	0.0504822	0.0472621
cg26756800	rs4503425:14019034:C:G	-7984	58	71	0.34466	0.000591657	0.179276	0.0505366	0.0445824
cg26756800	rs1599413:14019197:C:A	-7821	58	71	0.34466	0.000573507	0.180312	0.0506967	0.0436534
cg26756800	rs4748065:14019876:G:T	-7142	58	71	0.34466	0.000527628	0.181314	0.0506277	0.0412481
cg26756800	rs34792895:14021696:CAT:C	-5322	58	70	0.339806	0.00035884	0.191489	0.0518413	0.0315412
cg26756800	rs4750444:14029068:C:T	2050	59	71	0.34466	0.000393913	0.188153	0.051313	0.0336853
cg26756800	rs4748066:14029313:T:A	2295	59	71	0.34466	0.000381225	0.188248	0.0512063	0.0328956
cg26756800	rs7917296:14029639:G:A	2621	57	69	0.334951	0.000395276	0.186203	0.0507951	0.0337637
cg26756800	rs7917314:14029682:G:A	2664	59	72	0.349515	0.000359258	0.188448	0.0510227	0.0315696
cg26756800	rs11258774	2683	59	72	0.349515	0.000529206	0.181281	0.0506311	0.0413328
cg26756800	rs11258775:14029742:T:C	2724	59	72	0.349515	0.000356198	0.188563	0.0510196	0.0313796
cg26756800	rs35982189:14029875:T:C	2857	53	62	0.300971	1.73785e-06	0.265118	0.0521953	0.000653951
cg26756800	rs7918501:14029895:C:T	2877	59	71	0.34466	0.000348433	0.188938	0.0510333	0.0309076
cg26756800	rs7917812:14030067:G:A	3049	59	71	0.34466	0.00033202	0.189807	0.0510763	0.0298507
cg26756800	rs4750445:14030314:C:T	3296	59	71	0.34466	0.000325694	0.190132	0.0510877	0.0294401
cg26756800	rs4748068:14030692:T:A	3674	59	71	0.34466	0.000320423	0.19052	0.0511276	0.0291039
cg26756800	rs7921741:14030776:G:A	3758	59	71	0.34466	0.000316131	0.190743	0.0511342	0.028843
cg26756800	rs7922870:14030921:C:T	3903	59	71	0.34466	0.000295789	0.192812	0.0514262	0.0275277
cg26756800	rs7911259:14031051:T:C	4033	59	71	0.34466	0.000302847	0.191502	0.0511689	0.0279997
cg26756800	rs4748070:14031388:G:A	4370	59	71	0.34466	0.000289792	0.192414	0.0512402	0.0271502
cg26756800	rs4748071:14031419:C:A	4401	59	71	0.34466	0.000303738	0.191768	0.0512517	0.0280575
cg26756800	rs4748072:14031420:A:G	4402	59	71	0.34466	0.000303738	0.191768	0.0512517	0.0280575
cg27542038	rs4237438:14018768:A:C	-8435	59	72	0.349515	0.000572239	0.088994	0.025017	0.0435897
cg27542038	rs4503425:14019034:C:G	-8169	58	71	0.34466	0.000541069	0.0887808	0.0248415	0.0419719
cg27542038	rs1599413:14019197:C:A	-8006	58	71	0.34466	0.000554922	0.0889226	0.0249332	0.0426851
cg27542038	rs4748065:14019876:G:T	-7327	58	71	0.34466	0.000536888	0.089086	0.0249109	0.0417467
cg27542038	rs35982189:14029875:T:C	2672	53	62	0.300971	6.24424e-05	0.111011	0.0265665	0.00900879
cg07698834	rs35982189:14029875:T:C	258	53	62	0.300971	0.000232219	-0.34169	0.0894927	0.0231832
cg07698834	rs1599906:14038429:C:A	8812	54	59	0.286408	0.000456585	-0.35265	0.0973159	0.0373619
cg07698834	rs4748075:14038517:T:C	8900	56	61	0.296117	0.000561257	-0.347867	0.097631	0.0430202
cg07698834	rs4748076:14038571:A:G	8954	56	61	0.296117	0.00059969	-0.346885	0.0978945	0.0449772
cg07698834	rs4748077:14038602:T:G	8985	56	61	0.296117	0.000570981	-0.347434	0.0976489	0.043528
cg07698834	rs12358292:14039107:A:G	9490	56	61	0.296117	0.000600336	-0.346092	0.0976796	0.0450136
cg07698834	rs11258788:14039320:A:T	9703	56	61	0.296117	0.000603902	-0.345923	0.0976803	0.0451978
cg16241033	rs10906564:14052026:A:G	1570	65	85	0.412621	6.78585e-05	-0.29902	0.0719428	0.00957297
cg16241033	rs12777331:14052850:G:A	2394	66	85	0.412621	3.7288e-05	-0.315345	0.0730826	0.00616179
cg16241033	rs10906565:14053244:T:C	2788	66	86	0.417476	7.71404e-05	-0.298537	0.0724267	0.0104808
cg16241033	rs10906566	2797	66	86	0.417476	7.73657e-05	-0.29848	0.0724265	0.0105045
cg16241033	rs10906567:14053591:T:C	3135	67	88	0.427184	0.000177001	-0.28337	0.0727649	0.0190668
cg16241033	rs10508471:14054106:G:A	3650	66	86	0.417476	7.08646e-05	-0.302198	0.0729112	0.00986836
cg16241033	rs11595071:14055709:T:A	5253	65	83	0.402913	6.67589e-05	-0.308077	0.074044	0.0094618
cg16241033	rs11596572:14055721:G:A	5265	65	83	0.402913	7.50007e-05	-0.30554	0.0739896	0.0102758
cg16241033	rs11258798:14059708:C:T	9252	66	85	0.412621	9.38385e-05	-0.300896	0.0739492	0.0120706
cg05888872	rs10906564:14052026:A:G	1546	65	85	0.412621	2.45066e-05	-0.343996	0.077757	0.00452164
cg05888872	rs12777331:14052850:G:A	2370	66	85	0.412621	2.14161e-05	-0.353729	0.0793349	0.00409829
cg05888872	rs10906565:14053244:T:C	2764	66	86	0.417476	3.39793e-05	-0.340313	0.0784276	0.00576442
cg05888872	rs10906566	2773	66	86	0.417476	3.41547e-05	-0.340214	0.0784291	0.00578725
cg05888872	rs10906567:14053591:T:C	3111	67	88	0.427184	6.2397e-05	-0.328587	0.0786318	0.0090041
cg05888872	rs10508471:14054106:G:A	3626	66	86	0.417476	3.02661e-05	-0.344867	0.0789289	0.00528874
cg05888872	rs11595071:14055709:T:A	5229	65	83	0.402913	4.44409e-05	-0.343605	0.0804918	0.00700629
cg05888872	rs11596572:14055721:G:A	5241	65	83	0.402913	5.02074e-05	-0.340779	0.0804372	0.00766811
cg05888872	rs11258798:14059708:C:T	9228	66	85	0.412621	6.1917e-05	-0.336069	0.0803827	0.00895625
cg02101203	rs2292368	173	43	50	0.242718	0.000657795	0.356681	0.101447	0.0477996
cg02101203	rs2292367:14050770:A:C	248	43	50	0.242718	0.000657795	0.356681	0.101447	0.0477996
cg02101203	rs17154355:14051066:C:A	544	43	50	0.242718	0.000657322	0.356836	0.101485	0.0477784
cg02101203	rs34128473:14051209:T:C	687	43	50	0.242718	0.000657322	0.356836	0.101485	0.0477784
cg02101203	rs55795736:14051248:A:G	726	43	50	0.242718	0.00065687	0.356989	0.101522	0.0477572
cg02101203	rs10906564:14052026:A:G	1504	65	85	0.412621	5.21723e-06	-0.397284	0.0825406	0.00144416
cg02101203	rs12783779:14052388:T:A	1866	42	49	0.237864	0.000544662	0.363775	0.101842	0.0421542
cg02101203	rs12777331:14052850:G:A	2328	66	85	0.412621	5.48169e-06	-0.405028	0.0843628	0.00149891
cg02101203	rs10906565:14053244:T:C	2722	66	86	0.417476	7.41446e-06	-0.393583	0.0832736	0.00186948
cg02101203	rs10906566	2731	66	86	0.417476	7.45698e-06	-0.393475	0.0832757	0.00187724
cg02101203	rs10906567:14053591:T:C	3069	67	88	0.427184	3.27514e-05	-0.366129	0.0841909	0.00561333
cg02101203	rs10508471:14054106:G:A	3584	66	86	0.417476	7.81208e-06	-0.395641	0.0839394	0.00194314
cg02101203	rs11595071:14055709:T:A	5187	65	83	0.402913	9.1102e-06	-0.399329	0.0854162	0.00217734
cg02101203	rs11596572:14055721:G:A	5199	65	83	0.402913	1.02876e-05	-0.396463	0.0853586	0.00238867
cg02101203	rs34204327:14057590:A:G	7068	40	46	0.223301	0.000632361	0.371309	0.105255	0.0465592
cg02101203	rs11258798:14059708:C:T	9186	66	85	0.412621	2.84705e-05	-0.376944	0.0859579	0.00505479
cg06981391	rs2292368	122	43	50	0.242718	0.000678152	0.350724	0.100011	0.0488222
cg06981391	rs2292367:14050770:A:C	197	43	50	0.242718	0.000678152	0.350724	0.100011	0.0488222
cg06981391	rs17154355:14051066:C:A	493	43	50	0.242718	0.000676219	0.350933	0.100047	0.0487234
cg06981391	rs34128473:14051209:T:C	636	43	50	0.242718	0.000676219	0.350933	0.100047	0.0487234
cg06981391	rs55795736:14051248:A:G	675	43	50	0.242718	0.00067431	0.351141	0.100082	0.0486314
cg06981391	rs10906564:14052026:A:G	1453	65	85	0.412621	8.70598e-05	-0.341645	0.0835467	0.0114341
cg06981391	rs12783779:14052388:T:A	1815	42	49	0.237864	0.000684858	0.352443	0.100586	0.0491572
cg06981391	rs12777331:14052850:G:A	2277	66	85	0.412621	5.21284e-05	-0.35901	0.0849398	0.0078843
cg06981391	rs10906565:14053244:T:C	2671	66	86	0.417476	9.6894e-05	-0.341433	0.0840917	0.0123483
cg06981391	rs10906566	2680	66	86	0.417476	9.71511e-05	-0.341371	0.0840913	0.0123699
cg06981391	rs10906567:14053591:T:C	3018	67	88	0.427184	0.000184727	-0.32743	0.0843373	0.0196708
cg06981391	rs10508471:14054106:G:A	3533	66	86	0.417476	9.16054e-05	-0.345101	0.0846772	0.0118593
cg06981391	rs11595071:14055709:T:A	5136	65	83	0.402913	8.10393e-05	-0.353105	0.0859421	0.010844
cg06981391	rs11596572:14055721:G:A	5148	65	83	0.402913	9.20559e-05	-0.34992	0.0858878	0.0119019
cg06981391	rs11258798:14059708:C:T	9135	66	85	0.412621	0.000179158	-0.335387	0.0861967	0.0192364
cg03896078	rs11258790:14041157:T:A	-9435	56	61	0.296117	0.000486458	0.294119	0.0815817	0.0390517
cg03896078	rs12414109:14041218:C:G	-9374	55	60	0.291262	0.00042264	0.297121	0.0814855	0.0354324
cg03896078	rs34567224:14042695:CT:C	-7897	56	61	0.296117	0.000484857	0.294219	0.0815877	0.0389572
cg03896078	rs1008733:14042814:A:G	-7778	56	61	0.296117	0.000477524	0.294642	0.0816038	0.0385409
[truncated: 300,897+ more rows]
