# Supplementary material for: Multi-omics colocalization with genome-wide association studies reveals a context-specific genetic mechanism at a childhood onset asthma risk locus
Source: Genome Med. 2021 Oct 10;13:157. doi: 10.1186/s13073-021-00967-y (PMC8504130; doi:10.1186/s13073-021-00967-y)
Supplement: Supplementary file 9 — Additional file 9:. FastQTL meQTL mapping results for RV-treated AECs (FDR< 0.05). [file 13073_2021_967_MOESM9_ESM.xlsx]

## Sheet: Legend for Additional File 9
Additional File 9 FastQTL meQTL mapping results for RV-treated AECs (FDR<0.05)

## Sheet: Additional File 9
gene_id	variant_id	tss_distance	ma_samples	ma_count	maf	npval	slope	slope_se	fdr
cg02932204	rs807023	-2932	37	39	0.18932	1.22706e-06	0.362619	0.070247	0.000529609
cg02932204	rs807022:102770327:A:G	-2687	37	39	0.18932	2.74587e-07	0.38671	0.0701775	0.000178097
cg02932204	rs807021:102770953:A:C	-2061	32	34	0.165049	0.000275876	0.289991	0.0769374	0.0275009
cg17034508	rs72842048:102867522:G:A	-5198	29	31	0.150485	0.000313995	0.258553	0.0692768	0.0300721
cg17034508	rs72842054:102872698:T:C	-22	34	36	0.174757	0.000132082	0.262189	0.0659514	0.0163349
cg17034508	rs72842055:102872723:C:T	3	34	36	0.174757	0.000132082	0.262189	0.0659514	0.0163349
cg17034508	rs144068579:102872954:T:TA	234	34	36	0.174757	0.000151736	0.257675	0.065447	0.0180366
cg17034508	rs3850698:102872977:C:T	257	34	36	0.174757	0.000158733	0.257693	0.06566	0.01864
cg17034508	rs11190831	619	34	36	0.174757	0.000157254	0.256698	0.0653632	0.018516
cg17034508	rs4553305:102874015:A:G	1295	34	36	0.174757	0.000157254	0.256698	0.0653632	0.018516
cg17034508	rs75966688:102874193:AT:A	1473	34	36	0.174757	0.000214631	0.253056	0.065895	0.0230691
cg17034508	rs56972927:102876160:G:A	3440	34	36	0.174757	0.000151586	0.25767	0.0654411	0.0180251
cg17034508	rs57518582:102876720:C:T	4000	34	36	0.174757	0.000150199	0.257873	0.0654504	0.0179186
cg17034508	rs58332679:102876954:A:AT	4234	33	35	0.169903	3.73892e-05	0.281981	0.065361	0.00651739
cg17034508	rs11190833:102877086:C:A	4366	34	36	0.174757	0.000148349	0.258188	0.0654733	0.0177635
cg17034508	rs56050648:102877465:C:A	4745	34	36	0.174757	0.000149527	0.258097	0.0654864	0.0178599
cg17034508	rs11190834:102877576:G:A	4856	34	36	0.174757	0.000146155	0.258546	0.0654955	0.0175745
cg17034508	rs1556865:102877921:A:T	5201	34	36	0.174757	0.000145296	0.258697	0.0655067	0.0174988
cg17034508	rs147630770:102878090:C:CCTGAGGA	5370	34	36	0.174757	0.000144745	0.258789	0.0655126	0.0174501
cg17034508	rs79121283:102878255:T:C	5535	34	36	0.174757	0.00014322	0.259045	0.065529	0.0173206
cg17034508	rs3050335:102878513:CAG:C	5793	34	36	0.174757	0.000141095	0.259394	0.0655487	0.01713
cg17034508	rs1556864:102878609:T:A	5889	34	36	0.174757	0.000141095	0.259394	0.0655487	0.01713
cg17034508	rs17756236:102878811:G:A	6091	34	36	0.174757	0.000140599	0.260111	0.0657138	0.0170872
cg17034508	rs11190835:102879620:A:G	6900	35	37	0.179612	0.00012767	0.262348	0.0658365	0.015944
cg17034508	rs11190836:102879769:G:T	7049	34	36	0.174757	0.000109721	0.266721	0.0662434	0.0143133
cg09549514	rs4919518:102903609:A:G	-710	73	92	0.446602	0.000204509	0.0622165	0.0161439	0.0222734
cg09549514	rs2185174:102904349:A:G	30	73	92	0.446602	0.000203246	0.0622256	0.0161389	0.0221756
cg09549514	rs7072746:102906395:T:A	2076	65	80	0.38835	0.0003703	0.0600028	0.0162844	0.0337237
cg09549514	rs6584413:102908243:G:A	3924	72	90	0.436893	0.000122899	0.0646482	0.0161811	0.0155238
cg09549514	rs4917928:102909665:G:A	5346	64	79	0.383495	0.000385518	0.0591159	0.0160947	0.034688
cg09549514	rs4919522:102909909:T:C	5590	64	79	0.383495	0.00038351	0.0591322	0.0160924	0.0345684
cg09549514	rs4919523:102912026:A:G	7707	72	90	0.436893	0.000135322	0.0639481	0.0161127	0.0166199
cg09549514	rs4919525:102912303:A:G	7984	73	91	0.441748	0.000141217	0.0642407	0.0162345	0.01714
cg09549514	rs4919526:102913423:C:T	9104	72	90	0.436893	0.000124194	0.0645008	0.0161558	0.0156321
cg09549514	rs4919527:102913538:G:A	9219	72	90	0.436893	0.000136885	0.0639137	0.0161169	0.0167591
cg23775470	rs792699:102942689:C:G	-7568	41	44	0.213592	0.000126716	-0.142278	0.0356864	0.0158606
cg23775470	rs2093460:102952293:C:G	2036	65	80	0.38835	0.00046168	0.105056	0.0290169	0.0392023
cg23775470	rs792727:102954401:A:C	4144	65	80	0.38835	0.000543414	0.10357	0.02899	0.0438776
cg06874323	rs11598177:102980156:T:C	-6370	66	88	0.427184	0.000479945	0.166499	0.0461325	0.0402705
cg06874323	rs1322332:102982648:T:C	-3878	67	91	0.441748	0.00027042	0.170297	0.0451132	0.0271259
cg06874323	rs1322331	63	67	91	0.441748	0.000268868	0.170358	0.0451099	0.0270187
cg13525448	rs1407409:102985407:T:C	-1195	33	38	0.184466	0.000253656	0.197837	0.0521576	0.0259785
cg13525448	rs1322330:102991659:A:G	5057	33	38	0.184466	0.000249257	0.196628	0.0517712	0.0256626
cg13525448	rs625039	7047	33	38	0.184466	0.000253656	0.197837	0.0521576	0.0259785
cg24233594	rs11190916:103067951:G:A	1579	78	102	0.495146	0.000338954	-0.127805	0.034447	0.0316807
cg24233594	rs11190917:103067955:C:T	1583	78	102	0.495146	0.000338954	-0.127805	0.034447	0.0316807
cg24233594	rs10883609:103068503:T:C	2131	78	102	0.495146	0.000334935	-0.127934	0.0344498	0.0314249
cg24233594	rs10883610:103068730:A:G	2358	78	102	0.495146	0.000335464	-0.127945	0.034457	0.0314575
cg24233594	rs34966427:103068923:T:TG	2551	73	90	0.436893	0.000546262	-0.128039	0.0358544	0.0440363
cg24233594	rs4919537:103069096:C:T	2724	78	102	0.495146	0.000328463	-0.128178	0.0344633	0.031011
cg11139010	rs139269301:103358007:T:TA	-5009	13	13	0.0631068	1.14039e-07	0.405311	0.0709824	9.37717e-05
cg11139010	rs148500716:103363252:C:T	236	13	13	0.0631068	1.16524e-07	0.404838	0.0709599	9.52486e-05
cg11139010	rs151182360:103367480:T:TGA	4464	12	12	0.0582524	1.59844e-05	0.348321	0.0768342	0.00351903
cg07266855	rs10883688:103510393:A:C	-8876	79	103	0.5	0.000360179	0.16926	0.0458365	0.0330515
cg07266855	rs10699284:103519378:G:GCAGGC	109	70	87	0.42233	1.30329e-05	0.202682	0.0442039	0.00301795
cg07266855	rs749694	515	78	102	0.495146	0.000209612	0.172328	0.0447959	0.02268
cg07266855	rs10786648:103521325:T:C	2056	70	87	0.42233	1.37997e-05	0.202273	0.0442542	0.00315196
cg20564892	rs11191127:103597354:C:T	-6210	45	52	0.252427	3.46422e-05	0.213608	0.0492848	0.00616038
cg20564892	rs12413444:103603162:G:T	-402	45	52	0.252427	3.37939e-05	0.213745	0.0492428	0.00605044
cg20564892	rs1044258:103605714:T:C	2150	52	61	0.296117	0.00057661	0.173133	0.0487	0.0457232
cg20564892	rs11191130:103613232:C:G	9668	45	52	0.252427	3.41548e-05	0.213604	0.0492418	0.00609683
cg10228989	rs7090198:103608495:G:A	-8	45	48	0.23301	0.000640014	0.10652	0.0302262	0.0490971
cg10228989	rs935446:103608860:G:A	357	45	48	0.23301	0.000642051	0.106445	0.0302128	0.0492064
cg10228989	rs7918620:103609704:G:T	1201	52	56	0.271845	0.000430868	0.106289	0.0291946	0.0374131
cg10228989	rs1530589:103618033:C:T	9530	52	56	0.271845	0.000430868	0.106289	0.0291946	0.0374131
cg24362923	rs7906477:103987258:T:A	1396	10	11	0.0533981	3.97717e-07	1.00587	0.185404	0.000232746
cg16722561	rs56384670:104179219:C:A	-4996	45	49	0.237864	2.29169e-06	-0.219029	0.0436915	0.000832597
cg16722561	rs41287462:104184213:G:A	-2	45	49	0.237864	2.105e-06	-0.219669	0.0436416	0.000784893
cg16722561	rs11597439:104184953:C:G	738	55	69	0.334951	9.66739e-05	-0.14939	0.0367876	0.0130796
cg16722561	rs11593146	766	55	69	0.334951	8.18199e-05	-0.150361	0.0366194	0.0115806
cg16722561	rs72845696:104187404:C:T	3189	42	46	0.223301	4.89407e-05	-0.19271	0.0454145	0.00793554
cg16722561	rs6584499:104188259:G:T	4044	56	69	0.334951	0.000126318	0.149782	0.0375605	0.0158221
cg24846309	rs3837341:104192184:C:CG	-1206	43	48	0.23301	0.000403863	-0.158508	0.0433138	0.035812
cg24846309	rs7921010:104192826:G:T	-564	34	37	0.179612	0.000172931	-0.181464	0.0465194	0.0197879
cg24846309	rs74878980:104195026:C:CA	1636	24	27	0.131068	0.000465213	-0.186132	0.0514421	0.0394112
cg24846309	rs139914110:104197363:TG:T	3973	24	27	0.131068	0.000466777	-0.18596	0.0514084	0.0395073
cg18996543	rs12415921:104191769:G:T	-1985	29	33	0.160194	0.000452728	-0.155053	0.0427587	0.0386907
cg18996543	rs1572531:104193733:T:C	-21	29	33	0.160194	0.000496315	-0.153485	0.0426428	0.0411967
cg18996543	rs12780386:104196866:C:T	3112	29	33	0.160194	0.000494119	-0.153412	0.0426071	0.0410801
cg18996543	rs11599868:104201381:A:G	7627	29	33	0.160194	0.000495783	-0.153259	0.0425765	0.0411694
cg18996543	rs11597058:104201995:A:G	8241	29	33	0.160194	0.000495783	-0.153259	0.0425765	0.0411694
cg18848365	rs11394977:104226408:T:TA	-261	53	62	0.300971	0.000356242	0.0985994	0.0266783	0.0327974
cg18848365	rs111503247:104234781:G:GC	8112	53	62	0.300971	0.000356549	0.0986028	0.0266811	0.0328147
cg18848365	rs10883725:104235956:G:C	9287	53	62	0.300971	0.000356549	0.0986028	0.0266811	0.0328147
cg18848365	rs10883726:104236276:C:T	9607	53	62	0.300971	0.000356549	0.0986028	0.0266811	0.0328147
cg18848365	rs1056739:104236542:T:C	9873	53	62	0.300971	0.000356549	0.0986028	0.0266811	0.0328147
cg18848365	rs1056740:104236552:C:T	9883	53	62	0.300971	0.000356549	0.0986028	0.0266811	0.0328147
cg18848365	rs1056741:104236640:A:C	9971	53	62	0.300971	0.000333634	0.0992243	0.0267109	0.0313399
cg10897344	rs12570201:104222963:T:C	-4151	78	95	0.461165	0.000269653	-0.126684	0.0335525	0.0270708
cg10897344	rs7341995:104223831:G:A	-3283	78	95	0.461165	0.000456715	-0.122067	0.0336858	0.0389251
cg10897344	rs11591780:104225316:C:G	-1798	79	98	0.475728	0.000653035	-0.117007	0.0332585	0.0497821
cg10897344	rs10883723:104225832:T:C	-1282	50	58	0.281553	0.000348582	0.124486	0.0336256	0.0323151
cg10897344	rs11191294:104225837:T:G	-1277	50	58	0.281553	0.000348582	0.124486	0.0336256	0.0323151
cg10897344	rs71016381:104226239:CAAA:C	-875	82	102	0.495146	0.000397694	-0.123656	0.0337489	0.0354433
cg10897344	rs11394977:104226408:T:TA	-706	53	62	0.300971	0.000175412	0.128289	0.0329211	0.0199896
cg10897344	rs1984795:104226830:C:T	-284	82	103	0.5	0.000644883	-0.117957	0.033493	0.0493633
cg10897344	rs2015583:104226983:A:G	-131	82	103	0.5	0.000644883	-0.117957	0.033493	0.0493633
cg10897344	rs12781742:104227469:G:A	355	82	103	0.5	0.000650096	-0.118079	0.0335505	0.0496336
cg10897344	rs12763794:104227661:T:C	547	82	103	0.5	0.000645182	-0.117954	0.0334933	0.0493781
cg10897344	rs11593526:104228017:C:A	903	82	103	0.5	0.000647245	-0.117923	0.0334937	0.0494904
cg10897344	rs11593583:104228149:G:A	1035	82	103	0.5	0.000645182	-0.117954	0.0334933	0.0493781
cg10897344	rs11593589:104228299:C:A	1185	82	103	0.5	0.000645182	-0.117954	0.0334933	0.0493781
cg10897344	rs35597970:104229057:C:CA	1943	82	102	0.495146	0.000392828	-0.123772	0.0337477	0.0351301
cg10897344	rs41306870:104229785:C:T	2671	82	103	0.5	0.000645182	-0.117954	0.0334933	0.0493781
cg10897344	rs2025712:104230064:T:C	2950	82	103	0.5	0.000645182	-0.117954	0.0334933	0.0493781
cg10897344	rs2025713	3042	82	103	0.5	0.000645182	-0.117954	0.0334933	0.0493781
cg10897344	rs11191295:104231054:A:G	3940	82	103	0.5	0.000645182	-0.117954	0.0334933	0.0493781
cg10897344	rs11356476:104231519:GA:G	4405	82	100	0.485437	0.000271432	-0.130474	0.0345736	0.0272002
cg10897344	rs7081110:104231651:A:G	4537	82	103	0.5	0.000645182	-0.117954	0.0334933	0.0493781
cg10897344	rs7081467:104231662:G:C	4548	82	103	0.5	0.000645182	-0.117954	0.0334933	0.0493781
cg10897344	rs3740414:104232809:T:G	5695	82	103	0.5	0.000645182	-0.117954	0.0334933	0.0493781
cg10897344	rs11593971:104234090:C:G	6976	77	94	0.456311	0.000121641	-0.13151	0.0328929	0.0154115
cg10897344	rs111503247:104234781:G:GC	7667	53	62	0.300971	0.000175197	0.12831	0.0329239	0.0199711
cg10897344	rs10883725:104235956:G:C	8842	53	62	0.300971	0.000175197	0.12831	0.0329239	0.0199711
cg10897344	rs11595149:104235978:C:T	8864	78	95	0.461165	7.04449e-05	-0.137049	0.0330531	0.0103676
cg10897344	rs10883726:104236276:C:T	9162	53	62	0.300971	0.000175197	0.12831	0.0329239	0.0199711
cg10897344	rs1056738:104236481:G:A	9367	52	61	0.296117	0.000274995	0.124355	0.0329846	0.0274387
cg10897344	rs1056739:104236542:T:C	9428	53	62	0.300971	0.000175197	0.12831	0.0329239	0.0199711
cg10897344	rs1056740:104236552:C:T	9438	53	62	0.300971	0.000175197	0.12831	0.0329239	0.0199711
cg10897344	rs1056741:104236640:A:C	9526	53	62	0.300971	0.000150114	0.129762	0.0329333	0.0179113
cg10897344	rs1056744	9573	77	94	0.456311	0.000121641	-0.13151	0.0328929	0.0154115
cg10897344	rs61873704:104236929:T:C	9815	53	62	0.300971	0.000175197	0.12831	0.0329239	0.0199711
cg10897344	rs12569526:104237007:A:G	9893	77	94	0.456311	0.000121641	-0.13151	0.0328929	0.0154115
cg15685307	rs10883723:104225832:T:C	-2250	50	58	0.281553	0.000198154	0.141135	0.0365374	0.0217912
cg15685307	rs11191294:104225837:T:G	-2245	50	58	0.281553	0.000198154	0.141135	0.0365374	0.0217912
cg15685307	rs71016381:104226239:CAAA:C	-1843	82	102	0.495146	0.00029288	-0.137929	0.0367603	0.0286582
cg15685307	rs11394977:104226408:T:TA	-1674	53	62	0.300971	2.4769e-05	0.156089	0.0353043	0.00484207
cg15685307	rs1984795:104226830:C:T	-1252	82	103	0.5	0.000348933	-0.134664	0.0363776	0.032338
cg15685307	rs2015583:104226983:A:G	-1099	82	103	0.5	0.000348933	-0.134664	0.0363776	0.032338
cg15685307	rs12781718:104227433:G:A	-649	82	103	0.5	0.000424038	-0.133886	0.036728	0.0370101
cg15685307	rs12781742:104227469:G:A	-613	82	103	0.5	0.000362561	-0.13453	0.0364503	0.0332062
cg15685307	rs12762305:104227623:C:T	-459	80	101	0.490291	0.000592844	-0.127651	0.0359899	0.0465827
cg15685307	rs12763794:104227661:T:C	-421	82	103	0.5	0.000346388	-0.134732	0.0363753	0.0321698
cg15685307	rs11593526:104228017:C:A	-65	82	103	0.5	0.000339059	-0.134927	0.0363674	0.0316881
cg15685307	rs11593583:104228149:G:A	67	82	103	0.5	0.000346388	-0.134732	0.0363753	0.0321698
cg15685307	rs11593589:104228299:C:A	217	82	103	0.5	0.000346388	-0.134732	0.0363753	0.0321698
cg15685307	rs35597970:104229057:C:CA	975	82	102	0.495146	0.000286496	-0.138142	0.0367556	0.0282394
cg15685307	rs41306870:104229785:C:T	1703	82	103	0.5	0.000346388	-0.134732	0.0363753	0.0321698
cg15685307	rs2025712:104230064:T:C	1982	82	103	0.5	0.000346388	-0.134732	0.0363753	0.0321698
cg15685307	rs2025713	2074	82	103	0.5	0.000346388	-0.134732	0.0363753	0.0321698
cg15685307	rs58061354:104230930:TTCGGTGCTGGG:T	2848	82	103	0.5	0.000375119	-0.134486	0.0365359	0.0340401
cg15685307	rs11191295:104231054:A:G	2972	82	103	0.5	0.000346388	-0.134732	0.0363753	0.0321698
cg15685307	rs11356476:104231519:GA:G	3437	82	100	0.485437	0.000256828	-0.143042	0.0377464	0.0262002
cg15685307	rs7081110:104231651:A:G	3569	82	103	0.5	0.000346388	-0.134732	0.0363753	0.0321698
cg15685307	rs7081467:104231662:G:C	3580	82	103	0.5	0.000346388	-0.134732	0.0363753	0.0321698
cg15685307	rs3740415:104232716:G:A	4634	82	103	0.5	0.000354601	-0.134703	0.0364338	0.0326904
cg15685307	rs3740414:104232809:T:G	4727	82	103	0.5	0.000346388	-0.134732	0.0363753	0.0321698
cg15685307	rs111503247:104234781:G:GC	6699	53	62	0.300971	2.46143e-05	0.156151	0.0353055	0.00481958
cg15685307	rs10883725:104235956:G:C	7874	53	62	0.300971	2.46143e-05	0.156151	0.0353055	0.00481958
cg15685307	rs10883726:104236276:C:T	8194	53	62	0.300971	2.46143e-05	0.156151	0.0353055	0.00481958
cg15685307	rs1056738:104236481:G:A	8399	52	61	0.296117	0.000229488	0.137454	0.0359695	0.0241994
cg15685307	rs1056739:104236542:T:C	8460	53	62	0.300971	2.46143e-05	0.156151	0.0353055	0.00481958
cg15685307	rs1056740:104236552:C:T	8470	53	62	0.300971	2.46143e-05	0.156151	0.0353055	0.00481958
cg15685307	rs1056741:104236640:A:C	8558	53	62	0.300971	1.53632e-05	0.159973	0.0352092	0.00341621
cg15685307	rs61873704:104236929:T:C	8847	53	62	0.300971	2.46143e-05	0.156151	0.0353055	0.00481958
cg14976746	rs10883723:104225832:T:C	-2294	50	58	0.281553	7.17109e-05	0.188544	0.0455251	0.0104994
cg14976746	rs11191294:104225837:T:G	-2289	50	58	0.281553	7.17109e-05	0.188544	0.0455251	0.0104994
cg14976746	rs71016381:104226239:CAAA:C	-1887	82	102	0.495146	0.000476744	-0.167742	0.0464515	0.0400883
cg14976746	rs11394977:104226408:T:TA	-1718	53	62	0.300971	1.80307e-05	0.199366	0.0442767	0.00383636
cg14976746	rs35597970:104229057:C:CA	931	82	102	0.495146	0.000474755	-0.167805	0.0464533	0.0399648
cg14976746	rs11598884:104234588:A:G	6462	50	57	0.276699	0.000155678	-0.18418	0.0468645	0.0183761
cg14976746	rs111503247:104234781:G:GC	6655	53	62	0.300971	1.79332e-05	0.199436	0.0442786	0.00382098
cg14976746	rs10883725:104235956:G:C	7830	53	62	0.300971	1.79332e-05	0.199436	0.0442786	0.00382098
cg14976746	rs11595149:104235978:C:T	7852	78	95	0.461165	0.000436613	-0.168017	0.0461989	0.0377628
cg14976746	rs10883726:104236276:C:T	8150	53	62	0.300971	1.79332e-05	0.199436	0.0442786	0.00382098
cg14976746	rs1056738:104236481:G:A	8355	52	61	0.296117	2.88548e-05	0.194432	0.0443732	0.00541075
cg14976746	rs1056739:104236542:T:C	8416	53	62	0.300971	1.79332e-05	0.199436	0.0442786	0.00382098
cg14976746	rs1056740:104236552:C:T	8426	53	62	0.300971	1.79332e-05	0.199436	0.0442786	0.00382098
cg14976746	rs1056741:104236640:A:C	8514	53	62	0.300971	2.75477e-05	0.19568	0.0445361	0.00523035
cg14976746	rs61873704:104236929:T:C	8803	53	62	0.300971	1.79332e-05	0.199436	0.0442786	0.00382098
cg27555130	rs71016384:104229373:A:AG	-2420	28	32	0.15534	0.000143357	-0.14034	0.0355032	0.0173318
cg27555130	rs3808937:104230012:C:T	-1781	28	32	0.15534	0.00014268	-0.140366	0.035498	0.01727
cg27555130	rs11598884:104234588:A:G	2795	50	57	0.276699	1.7696e-06	-0.14899	0.0293575	0.000694433
cg27555130	rs2296580	9890	51	58	0.281553	5.15005e-06	-0.143037	0.0296981	0.00151584
cg09118835	rs13287:104240438:A:G	-4461	57	70	0.339806	0.000160979	0.137709	0.0351231	0.0188129
cg09118835	rs12162:104240498:A:G	-4401	57	70	0.339806	0.000171542	0.137437	0.0352125	0.019673
cg09118835	rs2296578:104240974:C:G	-3925	57	70	0.339806	0.000160979	0.137709	0.0351231	0.0188129
cg09118835	rs2296579:104241375:A:G	-3524	57	70	0.339806	0.000160979	0.137709	0.0351231	0.0188129
cg09118835	rs2296583:104244322:T:G	-577	57	70	0.339806	0.000160979	0.137709	0.0351231	0.0188129
cg09118835	rs2296584:104244323:T:A	-576	57	70	0.339806	0.000160979	0.137709	0.0351231	0.0188129
cg09118835	rs3781290:104244948:G:C	49	61	75	0.364078	0.000170041	0.137395	0.0351797	0.0195463
cg09118835	rs3781289:104244991:G:T	92	57	70	0.339806	0.000178279	0.137156	0.0352377	0.0202335
cg09118835	rs2296586:104245575:G:A	676	57	70	0.339806	0.000160979	0.137709	0.0351231	0.0188129
cg09118835	rs7898410:104245858:T:C	959	57	70	0.339806	0.000160979	0.137709	0.0351231	0.0188129
cg09118835	rs7917158:104246471:C:A	1572	57	70	0.339806	0.000160979	0.137709	0.0351231	0.0188129
cg09118835	rs7917402:104246690:C:T	1791	57	70	0.339806	0.000160979	0.137709	0.0351231	0.0188129
cg09118835	rs7917525:104246755:C:G	1856	57	70	0.339806	0.000160979	0.137709	0.0351231	0.0188129
cg09118835	rs12265877:104247247:C:G	2348	57	70	0.339806	0.000160979	0.137709	0.0351231	0.0188129
cg09118835	rs7358266:104247463:A:G	2564	57	70	0.339806	0.000160979	0.137709	0.0351231	0.0188129
cg09118835	rs11191299:104247481:C:T	2582	58	71	0.34466	0.000233485	0.135031	0.0353805	0.0245029
cg09118835	rs11191300:104247485:T:C	2586	57	70	0.339806	0.000160979	0.137709	0.0351231	0.0188129
cg09118835	rs7358268:104247589:C:T	2690	57	70	0.339806	0.000160678	0.137782	0.035137	0.018794
cg09118835	rs2296588:104248087:T:C	3188	57	70	0.339806	0.000160979	0.137709	0.0351231	0.0188129
cg09118835	rs2296589:104248106:T:A	3207	57	70	0.339806	0.000160979	0.137709	0.0351231	0.0188129
cg09118835	rs11386205:104249623:T:TC	4724	57	70	0.339806	0.000160979	0.137709	0.0351231	0.0188129
cg09118835	rs7092622:104249919:T:G	5020	58	71	0.34466	0.00020388	0.136623	0.0354427	0.0222246
cg09118835	rs7074444:104249922:A:G	5023	58	71	0.34466	0.00020388	0.136623	0.0354427	0.0222246
cg09118835	rs111446950:104250209:CT:C	5310	57	70	0.339806	0.000160979	0.137709	0.0351231	0.0188129
cg09118835	rs61873733:104251458:G:A	6559	57	70	0.339806	0.000163443	0.137827	0.0351912	0.0190056
cg09118835	rs6584504:104253507:T:C	8608	58	71	0.34466	0.000233485	0.135031	0.0353805	0.0245029
cg09118835	rs7069356:104254359:G:C	9460	58	71	0.34466	0.000233485	0.135031	0.0353805	0.0245029
cg09118835	rs6584506:104254428:T:C	9529	58	71	0.34466	0.000233485	0.135031	0.0353805	0.0245029
cg09118835	rs6584507:104254623:G:A	9724	58	71	0.34466	0.000233485	0.135031	0.0353805	0.0245029
cg19045729	rs3781290:104244948:G:C	-7683	61	75	0.364078	0.000207321	0.135225	0.0351231	0.0224987
cg07466585	rs7069356:104254359:G:C	-9322	58	71	0.34466	0.000192855	-0.141972	0.036682	0.0213886
cg07466585	rs6584506:104254428:T:C	-9253	58	71	0.34466	0.000192855	-0.141972	0.036682	0.0213886
cg07466585	rs6584507:104254623:G:A	-9058	58	71	0.34466	0.000192855	-0.141972	0.036682	0.0213886
cg07466585	rs7898507:104255106:C:G	-8575	58	71	0.34466	0.000192855	-0.141972	0.036682	0.0213886
cg07466585	rs11191303:104255158:T:C	-8523	58	71	0.34466	0.000192855	-0.141972	0.036682	0.0213886
cg07466585	rs11191304:104255284:C:T	-8397	58	71	0.34466	0.000192855	-0.141972	0.036682	0.0213886
cg07466585	rs11191305:104255434:C:T	-8247	58	71	0.34466	0.000192855	-0.141972	0.036682	0.0213886
cg07466585	rs7475806:104255813:C:T	-7868	58	71	0.34466	0.000192855	-0.141972	0.036682	0.0213886
cg07466585	rs10786669:104256094:C:G	-7587	59	72	0.349515	0.000364985	-0.136845	0.037097	0.0333673
cg07466585	rs715439:104257809:A:C	-5872	58	71	0.34466	0.000192855	-0.141972	0.036682	0.0213886
cg07466585	rs6584508:104258567:A:G	-5114	58	71	0.34466	0.000193178	-0.141977	0.0366878	0.021412
cg07466585	rs7093028:104259417:A:G	-4264	58	71	0.34466	0.000192855	-0.141972	0.036682	0.0213886
cg07466585	rs2296590	-1053	58	71	0.34466	0.000192855	-0.141972	0.036682	0.0213886
cg07466585	rs3818470:104263675:T:C	-6	58	71	0.34466	0.000192855	-0.141972	0.036682	0.0213886
cg07466585	rs3808934:104264280:C:T	599	58	71	0.34466	0.000192855	-0.141972	0.036682	0.0213886
cg07466585	10:104265795:T:TG	2114	58	71	0.34466	0.000192855	-0.141972	0.036682	0.0213886
cg07466585	rs2281879:104268877:G:C	5196	58	71	0.34466	0.000192855	-0.141972	0.036682	0.0213886
cg07466585	rs10883728:104269301:G:A	5620	58	71	0.34466	0.000192855	-0.141972	0.036682	0.0213886
cg07466585	rs72188075:104270895:GTAA:G	7214	58	71	0.34466	0.000192855	-0.141972	0.036682	0.0213886
cg07466585	rs10786671:104271303:G:A	7622	58	71	0.34466	0.000192855	-0.141972	0.036682	0.0213886
cg07466585	rs3740406:104272789:C:T	9108	58	71	0.34466	0.000192855	-0.141972	0.036682	0.0213886
cg07787771	rs12784963:104336986:G:A	-4841	76	93	0.451456	0.000382354	-0.139863	0.0380537	0.0344941
cg07787771	rs12767100:104338014:A:C	-3813	76	93	0.451456	0.000382354	-0.139863	0.0380537	0.0344941
cg07787771	rs11595170:104339851:T:C	-1976	76	93	0.451456	0.000382354	-0.139863	0.0380537	0.0344941
cg07787771	rs9783158:104340704:C:T	-1123	76	93	0.451456	0.000382354	-0.139863	0.0380537	0.0344941
cg14640555	rs10444069:104346166:T:C	-9092	75	92	0.446602	0.000564081	-0.110244	0.0309535	0.045045
cg14640555	rs10883744:104347247:A:G	-8011	75	92	0.446602	0.000564081	-0.110244	0.0309535	0.045045
cg14640555	rs71474568:104348848:T:TTG	-6410	56	65	0.315534	0.000251108	0.118572	0.0312367	0.0257962
cg14640555	rs7072723:104349483:G:A	-5775	75	92	0.446602	0.000564081	-0.110244	0.0309535	0.045045
cg14640555	rs12411442:104349531:A:G	-5727	75	92	0.446602	0.000564081	-0.110244	0.0309535	0.045045
cg14640555	rs7898166:104349962:A:G	-5296	75	92	0.446602	0.000560985	-0.110317	0.0309598	0.04487
cg14640555	rs3839934:104352124:C:CCATTT	-3134	75	92	0.446602	0.000564081	-0.110244	0.0309535	0.045045
cg14640555	rs3936017:104354424:T:C	-834	75	92	0.446602	0.000561799	-0.110289	0.0309558	0.0449175
cg14640555	rs10748826:104354804:T:C	-454	75	92	0.446602	0.000561799	-0.110289	0.0309558	0.0449175
cg14640555	rs3934960:104355275:A:G	17	76	93	0.451456	0.000540807	0.111639	0.031236	0.0437309
cg14640555	rs10786689:104356359:T:C	1101	75	92	0.446602	0.000561799	-0.110289	0.0309558	0.0449175
cg14640555	rs4919661:104358403:T:C	3145	75	92	0.446602	0.000561799	-0.110289	0.0309558	0.0449175
cg14640555	rs4917975:104358407:C:G	3149	75	92	0.446602	0.000561799	-0.110289	0.0309558	0.0449175
cg14640555	rs12779854:104358474:G:A	3216	76	93	0.451456	0.000536907	0.1117	0.0312345	0.0435229
cg14640555	rs4917976:104360518:C:T	5260	75	92	0.446602	0.000569936	-0.110175	0.0309606	0.0453662
cg14640555	rs4917977:104363119:C:T	7861	75	92	0.446602	0.000560968	-0.110329	0.0309632	0.044869
cg14640555	rs4919663:104363293:T:C	8035	75	92	0.446602	0.000560968	-0.110329	0.0309632	0.044869
cg14640555	rs4919664:104363408:A:C	8150	75	92	0.446602	0.000560968	-0.110329	0.0309632	0.044869
cg14640555	rs10786691:104364652:G:A	9394	75	92	0.446602	0.000561799	-0.110289	0.0309558	0.0449175
cg26457868	rs10786689:104356359:T:C	-9328	75	92	0.446602	5.47776e-09	-0.370431	0.0580863	1.12296e-05
cg26457868	rs4919661:104358403:T:C	-7284	75	92	0.446602	5.47776e-09	-0.370431	0.0580863	1.12296e-05
cg26457868	rs4917975:104358407:C:G	-7280	75	92	0.446602	5.47776e-09	-0.370431	0.0580863	1.12296e-05
cg26457868	rs12779854:104358474:G:A	-7213	76	93	0.451456	7.23612e-09	0.371407	0.0587921	1.37799e-05
cg26457868	rs4917976:104360518:C:T	-5169	75	92	0.446602	5.45327e-09	-0.370479	0.0580851	1.12006e-05
cg26457868	rs4917977:104363119:C:T	-2568	75	92	0.446602	5.42799e-09	-0.370606	0.0580959	1.117e-05
cg26457868	rs4919663:104363293:T:C	-2394	75	92	0.446602	5.42799e-09	-0.370606	0.0580959	1.117e-05
cg26457868	rs4919664:104363408:A:C	-2279	75	92	0.446602	5.42799e-09	-0.370606	0.0580959	1.117e-05
cg26457868	rs10786691:104364652:G:A	-1035	75	92	0.446602	5.47776e-09	-0.370431	0.0580863	1.12296e-05
cg26457868	rs36008569:104365489:TG:T	-198	76	93	0.451456	7.18939e-09	0.371458	0.0587872	1.37163e-05
cg26457868	rs7075269:104365724:G:A	37	75	92	0.446602	5.47776e-09	-0.370431	0.0580863	1.12296e-05
cg26457868	rs4919665:104366042:T:C	355	75	92	0.446602	5.5109e-09	-0.370347	0.058085	1.12754e-05
cg26457868	rs4917978:104366353:T:C	666	75	92	0.446602	5.47776e-09	-0.370431	0.0580863	1.12296e-05
cg26457868	rs7904955:104367092:C:T	1405	50	59	0.286408	0.000158728	-0.251489	0.0640791	0.0186396
cg26457868	rs12782153:104368294:A:G	2607	76	93	0.451456	7.18939e-09	0.371458	0.0587872	1.37163e-05
cg26457868	rs10748827:104368336:G:T	2649	53	63	0.305825	0.000318781	-0.237148	0.0636154	0.0303828
cg26457868	rs10786695:104368756:A:C	3069	75	92	0.446602	5.47776e-09	-0.370431	0.0580863	1.12296e-05
cg26457868	rs11394237:104369039:T:TA	3352	75	92	0.446602	5.47776e-09	-0.370431	0.0580863	1.12296e-05
cg26457868	rs10736158:104370023:A:G	4336	76	93	0.451456	4.03045e-09	-0.374139	0.0580684	9.25528e-06
cg26457868	rs7907417:104370662:T:C	4975	75	92	0.446602	5.48956e-09	0.370403	0.0580862	1.12463e-05
cg26457868	rs11191352:104372244:A:G	6557	75	92	0.446602	5.45191e-09	-0.37039	0.0580707	1.11992e-05
cg26457868	rs10883753:104372441:C:T	6754	75	92	0.446602	5.47776e-09	-0.370431	0.0580863	1.12296e-05
cg26457868	rs7908249:104373300:A:G	7613	75	92	0.446602	5.47776e-09	-0.370431	0.0580863	1.12296e-05
cg26457868	rs7912339:104373758:G:C	8071	75	92	0.446602	5.34266e-09	-0.370772	0.0580909	1.10397e-05
cg26457868	rs4604806:104373904:G:A	8217	75	92	0.446602	5.34266e-09	-0.370772	0.0580909	1.10397e-05
cg26457868	rs4408249:104374653:T:A	8966	74	92	0.446602	4.10656e-09	-0.366433	0.0569078	9.37222e-06
cg26457868	rs7093285:104374815:G:C	9128	49	58	0.281553	0.000151606	-0.251869	0.0639684	0.0180255
cg26457868	rs2001389:104375258:G:A	9571	74	91	0.441748	6.69344e-09	-0.365697	0.0577346	1.29988e-05
cg07119830	rs10786701:104412308:C:T	1	20	21	0.101942	2.33657e-06	-0.476949	0.0952292	0.000844733
cg07119830	rs59744075:104418617:CAA:C	6310	20	21	0.101942	2.20909e-06	-0.479765	0.0955344	0.000812177
cg07119830	rs10883761:104420018:A:G	7711	20	21	0.101942	2.21718e-06	-0.480555	0.0957085	0.000814291
cg14602512	rs12765459:104465687:G:C	8880	39	44	0.213592	0.000189095	0.269603	0.0695595	0.0210936
cg05855489	rs149894803:104499251:A:AGAGTTGTAAAAGGGAACAACAG	-4370	73	93	0.451456	0.000538163	0.225705	0.0631257	0.0435888
cg16522697	rs2482501:104515725:C:A	-8412	48	54	0.262136	0.000489597	-0.158402	0.04396	0.0408228
cg16522697	rs2482499:104516246:G:A	-7891	48	54	0.262136	0.00048078	-0.158612	0.0439533	0.0403211
cg16522697	rs2863718:104519631:G:C	-4506	48	54	0.262136	0.000472373	0.158835	0.0439522	0.039829
cg16522697	rs2863717:104519829:A:G	-4308	48	54	0.262136	0.000470829	0.158911	0.0439616	0.0397423
cg16522697	rs7070903:104520197:G:C	-3940	48	54	0.262136	0.000464045	0.159119	0.0439674	0.0393452
cg16522697	rs7088981:104520423:T:C	-3714	48	54	0.262136	0.000460621	0.159244	0.0439755	0.0391386
cg16522697	rs4919671:104521022:A:G	-3115	48	54	0.262136	0.000444913	0.159674	0.0439713	0.0382397
cg16522697	rs4919672:104521104:T:C	-3033	48	54	0.262136	0.000443282	0.159733	0.0439744	0.0381528
cg16522697	rs4919673:104521319:G:A	-2818	48	54	0.262136	0.000437317	0.159886	0.0439687	0.0378064
cg16522697	rs4919674:104522226:T:C	-1911	48	54	0.262136	0.000418076	0.160477	0.0439728	0.0366591
cg16522697	rs1475646:104522564:G:T	-1573	48	54	0.262136	0.000418076	0.160477	0.0439728	0.0366591
cg16522697	rs10883773:104522885:T:C	-1252	48	54	0.262136	0.000418076	0.160477	0.0439728	0.0366591
cg16522697	rs4919676:104524352:C:T	215	48	54	0.262136	0.000418076	0.160477	0.0439728	0.0366591
cg16522697	rs7894154:104524647:G:A	510	48	54	0.262136	0.000418076	0.160477	0.0439728	0.0366591
cg16522697	rs4418737:104525123:A:G	986	48	54	0.262136	0.000418076	0.160477	0.0439728	0.0366591
cg16522697	rs7069489:104525371:C:T	1234	48	54	0.262136	0.000418076	0.160477	0.0439728	0.0366591
cg16522697	rs10786707:104526155:A:G	2018	48	54	0.262136	0.000418076	0.160477	0.0439728	0.0366591
cg16522697	rs10786708:104526245:A:G	2108	48	54	0.262136	0.000418076	0.160477	0.0439728	0.0366591
cg16522697	rs10748829:104527244:G:A	3107	48	54	0.262136	0.000418076	0.160477	0.0439728	0.0366591
cg16522697	rs7079231:104527341:G:A	3204	48	54	0.262136	0.000425813	0.160258	0.043977	0.0371108
cg16522697	rs7911747:104528890:A:G	4753	48	54	0.262136	0.000418076	0.160477	0.0439728	0.0366591
cg16522697	rs7897384:104529042:T:G	4905	48	54	0.262136	0.000418076	0.160477	0.0439728	0.0366591
cg10048578	rs12775376:104523634:G:A	-9541	39	45	0.218447	1.21113e-05	-0.263843	0.0573117	0.00285459
cg10048578	rs11191394:104528509:A:C	-4666	39	45	0.218447	1.20482e-05	-0.263937	0.0573155	0.00284344
cg10048578	rs71019613:104531316:G:GT	-1859	39	45	0.218447	1.20359e-05	-0.264114	0.0573508	0.00284116
cg10048578	rs10883775:104532004:T:C	-1171	78	102	0.495146	2.99823e-06	0.244142	0.0493389	0.00101692
cg10048578	rs12776506:104532828:A:G	-347	41	48	0.23301	2.25345e-05	-0.248979	0.0560057	0.00451396
cg10048578	rs593410:104532832:T:C	-343	78	102	0.495146	2.42659e-06	0.2448	0.0489665	0.000869148
cg10048578	rs549466	-262	78	102	0.495146	2.42269e-06	0.2443	0.0488628	0.000868198
cg10048578	rs553258:104533322:C:T	147	78	102	0.495146	2.42659e-06	0.2448	0.0489665	0.000869148
cg10048578	rs499770:104534907:C:G	1732	78	102	0.495146	2.43893e-06	-0.24489	0.0489965	0.000872409
cg10048578	rs2482498:104535450:G:C	2275	77	102	0.495146	1.96448e-06	-0.242015	0.0479233	0.000748226
cg10048578	rs2254563:104536365:C:G	3190	77	102	0.495146	1.96448e-06	-0.242015	0.0479233	0.000748226
cg10048578	rs630185:104537149:A:G	3974	77	102	0.495146	2.02505e-06	-0.24171	0.047932	0.000764049
cg10048578	rs2482496:104537943:C:G	4768	77	102	0.495146	1.96448e-06	-0.242015	0.0479233	0.000748226
cg10048578	rs2486756:104538581:T:C	5406	77	102	0.495146	1.96448e-06	-0.242015	0.0479233	0.000748226
cg10048578	rs541393:104538611:T:C	5436	77	102	0.495146	1.96448e-06	-0.242015	0.0479233	0.000748226
cg10048578	rs61870778:104539028:A:G	5853	77	102	0.495146	1.96448e-06	-0.242015	0.0479233	0.000748226
cg10048578	rs80151121:104539458:C:CT	6283	78	103	0.5	7.12902e-06	-0.232036	0.0489928	0.00193892
cg10048578	rs2254111:104539520:A:T	6345	78	103	0.5	7.12902e-06	-0.232036	0.0489928	0.00193892
cg10048578	rs2254093:104539917:T:G	6742	78	102	0.495146	2.4487e-06	-0.244987	0.0490253	0.000874964
cg10048578	rs2253983:104540461:C:T	7286	78	102	0.495146	2.4487e-06	-0.244987	0.0490253	0.000874964
cg10048578	rs674816:104540565:G:C	7390	77	102	0.495146	1.93074e-06	-0.242222	0.0479249	0.000739345
cg10048578	rs524430:104541500:C:A	8325	77	102	0.495146	1.96448e-06	-0.242015	0.0479233	0.000748226
cg10048578	rs525458:104541627:G:T	8452	77	102	0.495146	1.71672e-06	-0.244008	0.0480117	0.000679286
cg10048578	rs2253703:104542974:C:T	9799	78	103	0.5	8.10136e-06	-0.232737	0.0494726	0.00213037
cg14015502	rs11191394:104528509:A:C	-6512	39	45	0.218447	3.47649e-05	0.214912	0.0495962	0.00617706
cg14015502	rs71019613:104531316:G:GT	-3705	39	45	0.218447	3.5593e-05	0.214788	0.0496382	0.00628473
cg14015502	rs12776506:104532828:A:G	-2193	41	48	0.23301	0.000149	0.192538	0.0488402	0.0178168
cg10555609	rs11191394:104528509:A:C	-6698	39	45	0.218447	0.000502187	0.16721	0.0465008	0.0415317
cg10555609	rs71019613:104531316:G:GT	-3891	39	45	0.218447	0.000510071	0.167126	0.0465365	0.0419852
cg10555609	rs12776506:104532828:A:G	-2379	41	48	0.23301	0.000499175	0.162493	0.0451666	0.0413552
cg24385990	rs2253950:104541120:G:A	-4630	47	53	0.257282	5.36996e-06	-0.194878	0.040548	0.00156447
cg24385990	rs2253709:104542745:T:A	-3005	48	54	0.262136	1.71762e-05	-0.185168	0.0410106	0.00370417
cg05873389	rs7100530:104619448:A:G	-9364	62	72	0.349515	0.000384138	0.187422	0.0510124	0.0346027
cg05873389	rs10786715:104620735:G:C	-8077	62	72	0.349515	0.00044718	0.18595	0.0512282	0.0383729
cg05873389	rs12241517:104621068:A:G	-7744	54	64	0.31068	0.000202573	0.189792	0.0492128	0.0221245
cg05873389	rs4917985:104624072:G:A	-4740	62	72	0.349515	0.000383803	0.187419	0.0510081	0.0345858
cg05873389	rs4919691:104624475:T:G	-4337	62	72	0.349515	0.000383803	0.187419	0.0510081	0.0345858
cg05873389	rs10786716:104625178:T:C	-3634	62	72	0.349515	0.000383803	0.187419	0.0510081	0.0345858
cg05873389	rs10786717:104625237:A:G	-3575	54	64	0.31068	0.000202573	0.189792	0.0492128	0.0221245
cg05873389	rs11191424:104625886:G:A	-2926	54	64	0.31068	0.000202573	0.189792	0.0492128	0.0221245
cg05873389	rs11191425:104625970:C:T	-2842	24	25	0.121359	7.81616e-05	0.292059	0.0709159	0.0111987
cg05873389	rs11191426:104627230:G:T	-1582	23	24	0.116505	0.000131117	0.28706	0.0721708	0.0162553
cg05873389	rs7098825:104628234:T:C	-578	24	25	0.121359	7.81616e-05	0.292059	0.0709159	0.0111987
cg05873389	rs7085104	61	54	63	0.305825	0.000235288	0.191883	0.0503054	0.0246346
cg05873389	rs3740400:104629465:T:G	653	62	72	0.349515	0.000385252	0.187434	0.0510273	0.0346746
cg05873389	rs3832685:104629793:G:GCTC	981	62	72	0.349515	0.000386617	0.187418	0.0510372	0.034741
cg05873389	rs17878846:104630412:A:T	1600	23	24	0.116505	0.000131117	0.28706	0.0721708	0.0162553
cg05873389	rs10786718:104631189:G:A	2377	35	40	0.194175	5.63964e-05	0.232092	0.0551846	0.00881107
cg05873389	rs139792328:104631484:CAAACAAAACA:C	2672	35	39	0.18932	5.47063e-05	0.240406	0.0570517	0.00861964
cg05873389	rs12767543:104631663:G:A	2851	35	40	0.194175	5.6883e-05	0.232015	0.0551962	0.00886385
cg05873389	rs7904113:104633114:G:T	4302	62	72	0.349515	0.000401352	0.187225	0.0511357	0.0356717
cg05873389	rs7920657:104633244:T:A	4432	35	40	0.194175	5.75297e-05	0.23188	0.0552037	0.00893666
cg05873389	rs7920697:104633337:T:C	4525	35	40	0.194175	5.83472e-05	0.231652	0.0551987	0.00903171
cg05873389	rs12764049:104634956:A:G	6144	35	40	0.194175	6.03637e-05	0.231118	0.0551906	0.00925979
cg05873389	rs12764899:104635103:G:A	6291	31	35	0.169903	0.00034405	0.218511	0.0589631	0.0320239
cg05873389	rs12765337:104635344:G:C	6532	62	72	0.349515	0.000418012	0.186778	0.051179	0.0366574
cg05873389	rs12765002:104635348:C:T	6536	35	39	0.18932	6.03595e-05	0.238846	0.0570356	0.00925947
cg05873389	rs12770034:104635595:A:G	6783	62	72	0.349515	0.000421013	0.186692	0.0511847	0.0368381
cg05873389	rs12771681:104635620:T:C	6808	35	40	0.194175	6.21436e-05	0.230696	0.0551919	0.00945482
cg05873389	rs77335224:104636276:C:T	7464	24	25	0.121359	1.02065e-05	0.327418	0.070463	0.00252512
cg05873389	rs11191434:104637508:T:C	8696	26	28	0.135922	0.000144652	0.264128	0.0668611	0.0174435
cg05873389	rs3740390:104638480:C:T	9668	24	25	0.121359	8.14836e-05	0.292727	0.0712724	0.0115455
cg18534077	rs7100530:104619448:A:G	-9399	62	72	0.349515	0.000437416	0.182819	0.0502762	0.037811
cg18534077	rs10786715:104620735:G:C	-8112	62	72	0.349515	0.000525937	0.180918	0.0505039	0.0429069
cg18534077	rs12241517:104621068:A:G	-7779	54	64	0.31068	3.32129e-05	0.206949	0.0476275	0.00597653
cg18534077	rs4917985:104624072:G:A	-4775	62	72	0.349515	0.000436321	0.182838	0.0502712	0.0377443
cg18534077	rs4919691:104624475:T:G	-4372	62	72	0.349515	0.000436321	0.182838	0.0502712	0.0377443
cg18534077	rs10786716:104625178:T:C	-3669	62	72	0.349515	0.000436321	0.182838	0.0502712	0.0377443
cg18534077	rs10786717:104625237:A:G	-3610	54	64	0.31068	3.32129e-05	0.206949	0.0476275	0.00597653
cg18534077	rs11191424:104625886:G:A	-2961	54	64	0.31068	3.32129e-05	0.206949	0.0476275	0.00597653
cg18534077	rs11191425:104625970:C:T	-2877	24	25	0.121359	0.000531572	0.254368	0.0710699	0.043231
cg18534077	rs7098825:104628234:T:C	-613	24	25	0.121359	0.000531572	0.254368	0.0710699	0.043231
cg18534077	rs7085104	26	54	63	0.305825	7.87638e-06	0.225948	0.047958	0.00208852
cg18534077	rs3740400:104629465:T:G	618	62	72	0.349515	0.000438002	0.18285	0.0502902	0.0378425
cg18534077	rs3832685:104629793:G:GCTC	946	62	72	0.349515	0.000440036	0.182819	0.0503004	0.037959
cg18534077	rs7904113:104633114:G:T	4267	62	72	0.349515	0.000461381	0.182491	0.0504022	0.0391855
cg18534077	rs12764899:104635103:G:A	6256	31	35	0.169903	0.000418854	0.212179	0.0581483	0.0367059
cg18534077	rs12765337:104635344:G:C	6497	62	72	0.349515	0.000483619	0.181961	0.0504478	0.0404863
cg18534077	rs12770034:104635595:A:G	6748	62	72	0.349515	0.000488385	0.181841	0.0504546	0.0407529
cg02786313	rs7100530:104619448:A:G	-9418	62	72	0.349515	0.000292785	0.145809	0.0388595	0.0286511
cg02786313	rs10786715:104620735:G:C	-8131	62	72	0.349515	0.000461156	0.141698	0.0391338	0.0391713
cg02786313	rs4917985:104624072:G:A	-4794	62	72	0.349515	0.000292415	0.14581	0.0388561	0.0286269
cg02786313	rs4919691:104624475:T:G	-4391	62	72	0.349515	0.000292415	0.14581	0.0388561	0.0286269
cg02786313	rs10786716:104625178:T:C	-3688	62	72	0.349515	0.000292415	0.14581	0.0388561	0.0286269
cg02786313	rs3740400:104629465:T:G	599	62	72	0.349515	0.00029625	0.145733	0.0388741	0.0288949
cg02786313	rs3832685:104629793:G:GCTC	927	62	72	0.349515	0.000299343	0.145655	0.0388841	0.0290939
cg02786313	rs7904113:104633114:G:T	4248	62	72	0.349515	0.000329716	0.144936	0.0389807	0.0310939
cg02786313	rs12765337:104635344:G:C	6478	62	72	0.349515	0.000360674	0.144116	0.0390315	0.0330819
cg02786313	rs12770034:104635595:A:G	6729	62	72	0.349515	0.000365886	0.143979	0.0390384	0.033429
cg24252723	rs28606370:104670832:C:A	-7319	63	72	0.349515	0.000501979	0.151254	0.042062	0.0415197
cg03493300	rs7094843:104806654:A:C	-7213	72	87	0.42233	0.000186431	0.141151	0.0363808	0.0208894
cg03493300	rs11191531:104806898:G:C	-6969	24	25	0.121359	2.17578e-05	0.229466	0.0515119	0.00439882
cg03493300	rs12219027:104811203:T:C	-2664	24	25	0.121359	2.37962e-05	0.227995	0.051448	0.00470224
cg03493300	rs4917994:104811699:C:T	-2168	72	87	0.42233	0.000186431	0.141151	0.0363808	0.0208894
cg03493300	rs10883823:104812331:T:C	-1536	72	87	0.42233	0.000186431	0.141151	0.0363808	0.0208894
cg03493300	rs10883824:104812897:A:G	-970	72	87	0.42233	0.000186431	0.141151	0.0363808	0.0208894
cg03493300	rs2275271	295	72	87	0.42233	0.000186431	0.141151	0.0363808	0.0208894
cg03493300	rs72456156:104814347:GTGTTTTGTTTTTTTTGTTTTTT:G	480	23	24	0.116505	6.92145e-06	0.244989	0.0516478	0.00189676
cg03493300	rs11191534:104815827:A:G	1960	24	25	0.121359	2.37962e-05	0.227995	0.051448	0.00470224
cg03493300	rs144441152:104815871:AAAAAG:A	2004	24	25	0.121359	2.51624e-05	0.227494	0.0515021	0.00489887
cg03493300	rs7908280:104816947:C:G	3080	72	87	0.42233	0.000184928	0.141435	0.0364328	0.0207689
cg03493300	rs11191539:104819770:A:G	5903	72	87	0.42233	0.000184026	0.141619	0.0364673	0.0206956
cg11704582	rs72456156:104814347:GTGTTTTGTTTTTTTTGTTTTTT:G	77	23	24	0.116505	0.000446419	0.134755	0.0371192	0.0383258
cg03267668	rs11191539:104819770:A:G	-9337	72	87	0.42233	0.000371929	-0.0662172	0.0179772	0.0338365
cg03267668	rs11191541:104824199:A:G	-4908	72	87	0.42233	0.000366796	-0.0664432	0.0180189	0.0334913
cg03267668	rs11191542:104824324:T:A	-4783	72	87	0.42233	0.000366796	-0.0664432	0.0180189	0.0334913
cg03267668	rs943038:104826261:T:C	-2846	72	87	0.42233	0.000344053	-0.0669353	0.0180618	0.0320241
cg03267668	rs1926034:104829102:G:A	-5	72	87	0.42233	0.000346637	-0.0672565	0.0181591	0.0321869
cg03267668	rs10883826:104830819:A:G	1712	72	86	0.417476	0.000296516	-0.0680607	0.0181564	0.0289135
cg03267668	rs943036:104836047:T:C	6940	72	86	0.417476	0.000287149	-0.0682079	0.0181512	0.028281
cg17281126	rs10748838:104943986:T:A	-9424	72	86	0.417476	0.000167046	-0.0845306	0.0216165	0.0193014
cg17281126	rs3758543:104944744:C:G	-8666	72	86	0.417476	0.000167273	-0.0845267	0.0216176	0.0193184
cg17281126	rs3834416:104944767:C:CTG	-8643	72	86	0.417476	0.000167273	-0.0845267	0.0216176	0.0193184
cg17281126	rs4917997:104945213:A:G	-8197	72	86	0.417476	0.000167273	-0.0845267	0.0216176	0.0193184
cg17281126	rs7077097:104945463:G:A	-7947	72	86	0.417476	0.000167273	-0.0845267	0.0216176	0.0193184
cg17281126	rs7077291:104945751:C:T	-7659	72	86	0.417476	0.000165978	-0.0845897	0.0216218	0.0192201
cg17281126	rs7092407:104949116:G:A	-4294	72	86	0.417476	0.000165479	-0.0846194	0.0216247	0.0191798
cg17281126	rs7920251:104950197:C:T	-3213	72	86	0.417476	0.00016528	-0.0846645	0.0216344	0.0191598
cg17281126	rs10748839:104953547:T:C	137	72	85	0.412621	0.000281924	-0.0825269	0.0219311	0.0279269
cg17281126	rs10786745:104956827:A:G	3417	72	85	0.412621	0.000294029	-0.0821679	0.0219056	0.0287398
cg17281126	rs4307650:104959852:C:A	6442	72	85	0.412621	0.000322292	-0.0824635	0.0221397	0.0306206
cg17281126	rs66815818:104962011:C:CA	8601	72	85	0.412621	0.000255549	-0.083039	0.0219045	0.0261091
cg02324920	rs3736916:105261118:C:T	7965	77	102	0.495146	0.000222901	0.0768611	0.0200701	0.0237046
cg08758237	rs142254497:105311828:G:GTGA	-9889	34	37	0.179612	0.000180269	-0.118119	0.0303709	0.020394
cg08758237	rs72848976:105312536:G:A	-9181	35	38	0.184466	0.000310647	-0.11349	0.0303834	0.0298454
cg08758237	rs72848984:105321685:T:C	-32	35	38	0.184466	0.000149509	-0.12082	0.0306553	0.0178582
cg01778465	rs7067666	-7649	70	87	0.42233	0.000617387	-0.282949	0.0800462	0.0479045
cg01778465	rs12360357:105333127:C:T	-6974	31	33	0.160194	1.81737e-08	0.598494	0.097836	2.57523e-05
cg01778465	rs3781370:105335156:T:C	-4945	33	36	0.174757	3.5207e-10	0.618286	0.0888604	1.98801e-06
cg01778465	rs11191733:105336075:G:C	-4026	33	35	0.169903	3.98435e-09	0.610696	0.094747	9.19198e-06
cg01778465	rs10883886:105337994:T:C	-2107	33	35	0.169903	3.23191e-09	0.618053	0.0952272	7.97841e-06
cg01778465	rs12774610:105338800:G:T	-1301	33	35	0.169903	4.28059e-09	0.608773	0.0946743	9.6625e-06
cg01778465	rs1018014:105339421:A:G	-680	33	36	0.174757	4.05652e-10	0.615283	0.0888061	2.12773e-06
cg01778465	rs1018013:105339790:C:T	-311	33	35	0.169903	5.09935e-09	0.606612	0.0948923	1.07775e-05
cg01778465	rs7068070	-42	33	36	0.174757	4.10775e-10	0.614983	0.0887964	2.14677e-06
cg01778465	rs4917392:105341214:A:C	1113	31	34	0.165049	1.35773e-09	0.608401	0.091152	4.46057e-06
cg01778465	rs11191737:105344451:G:A	4350	32	34	0.165049	1.0736e-08	0.601099	0.0964546	1.80846e-05
cg01778465	rs7100958:105345327:C:T	5226	32	35	0.169903	1.01521e-09	0.610976	0.0907038	3.7571e-06
cg01778465	rs6584560:105345583:C:A	5482	32	35	0.169903	1.03245e-09	0.610891	0.090739	3.80263e-06
cg19810180	rs12258364:105392991:C:T	-8607	38	43	0.208738	0.000653971	0.412067	0.117142	0.0498287
cg19810180	rs34241369:105399229:A:G	-2369	32	33	0.160194	9.37766e-08	0.74275	0.129084	8.13173e-05
cg19810180	rs3824777:105400725:G:A	-873	72	87	0.42233	0.000191398	0.402271	0.10388	0.0212702
cg19810180	rs9665523:105401556:G:T	-42	45	49	0.237864	2.63605e-11	0.759123	0.101317	3.73783e-07
cg19810180	rs880549	4531	44	48	0.23301	7.97157e-12	0.775242	0.100215	1.88236e-07
cg19810180	rs7914478:105407790:C:T	6192	45	49	0.237864	2.68802e-11	0.758863	0.101336	3.78929e-07
cg19810180	rs10786761:105409785:C:T	8187	76	93	0.451456	0.00021323	0.40145	0.104486	0.0229664
cg19810180	rs1493173:105410382:C:T	8784	44	48	0.23301	8.04093e-12	0.776397	0.100387	1.88236e-07
cg03314958	rs1078287:105479915:G:C	-9964	53	69	0.334951	2.13793e-06	0.158892	0.0315904	0.000793207
cg03314958	rs72815789:105480535:G:A	-9344	47	62	0.300971	8.53067e-06	0.150919	0.0321686	0.0022103
cg03314958	rs7088114:105482700:G:A	-7179	52	69	0.334951	5.8912e-06	0.148601	0.0310668	0.00168072
cg03314958	rs7097676:105484912:C:G	-4967	53	70	0.339806	6.00365e-06	0.148816	0.0311419	0.00170485
cg03314958	rs7072004	2052	52	68	0.330097	7.31618e-06	0.14904	0.0315115	0.00197596
cg03314958	rs6584568:105495612:T:C	5733	52	68	0.330097	7.81639e-06	0.148884	0.0315882	0.0020776
cg03314958	rs11191789:105498738:G:GA	8859	40	49	0.237864	0.000510215	0.133163	0.0370804	0.0419926
cg00730670	rs879543:105500857:T:C	-9857	41	52	0.252427	1.62844e-06	0.272135	0.0534137	0.000653422
cg00730670	rs5787497:105502706:TC:T	-8008	40	51	0.247573	9.1366e-07	0.277186	0.052983	0.000427855
cg00730670	rs752681:105502714:T:A	-8000	40	51	0.247573	9.1366e-07	0.277186	0.052983	0.000427855
cg00730670	rs10633594:105503507:A:AAAAC	-7207	40	51	0.247573	9.1366e-07	0.277186	0.052983	0.000427855
cg00730670	rs6584569:105507309:A:G	-3405	37	46	0.223301	5.42697e-05	0.244175	0.0579169	0.00857018
cg00730670	rs56149148:105508171:C:T	-2543	17	21	0.101942	0.000128923	0.30628	0.0769132	0.0160647
cg00730670	rs7090045:105508269:C:G	-2445	29	33	0.160194	2.91211e-06	0.332757	0.0671513	0.000996563
cg00730670	rs6144057:105508910:A:AAGTGCTGGGATTAC	-1804	39	48	0.23301	7.66854e-07	0.291865	0.0553541	0.000377138
cg00730670	rs7098365:105509536:C:T	-1178	40	50	0.242718	5.47366e-07	0.287972	0.0538131	0.000295506
cg00730670	rs11395457:105509769:T:TC	-945	39	49	0.237864	2.60431e-07	0.295375	0.053485	0.000170825
cg00730670	rs2067560:105510744:A:G	30	34	40	0.194175	8.89528e-09	0.363636	0.0579714	1.59217e-05
cg00730670	rs12762008:105513241:A:G	2527	33	38	0.184466	3.37592e-08	0.364682	0.06097	3.96887e-05
cg00730670	rs1998294:105514002:C:T	3288	40	50	0.242718	5.55896e-07	0.288012	0.0538567	0.00029857
cg00730670	rs4918046:105515412:T:C	4698	33	38	0.184466	3.32452e-08	0.364773	0.0609507	3.93202e-05
cg00730670	rs55921327:105516342:G:A	5628	18	21	0.101942	0.000138083	0.319188	0.0805372	0.0168637
cg00730670	rs56309638:105520358:T:C	9644	18	21	0.101942	0.000149927	0.316658	0.0803603	0.0178943
cg00730670	rs56275413:105520424:C:T	9710	18	21	0.101942	0.000149417	0.31662	0.0803314	0.0178507
cg23900677	rs35696766:105536662:G:T	-5099	13	14	0.0679612	1.41494e-06	0.45584	0.0888875	0.000587357
cg23900677	rs4918049:105541586:G:A	-175	19	20	0.0970874	2.21893e-09	0.470854	0.0716625	6.14517e-06
cg08891503	rs35696766:105536662:G:T	-5288	13	14	0.0679612	0.000212162	0.273257	0.071095	0.0228818
cg08891503	rs4918049:105541586:G:A	-364	19	20	0.0970874	1.72961e-05	0.268882	0.0595749	0.00372385
cg24587175	rs3752949:105670503:A:G	-106	43	48	0.23301	1.69775e-07	1.0705	0.190479	0.000126063
cg24587175	rs3752948:105670762:G:A	153	43	48	0.23301	1.67026e-07	1.0715	0.190531	0.000124498
cg22740801	rs11191885:105722281:T:G	-3426	30	31	0.150485	0.000157874	0.361318	0.0920283	0.01857
cg22740801	rs4918075:105722666:A:C	-3041	41	42	0.203883	1.71422e-05	0.382804	0.0847734	0.00369906
cg22740801	rs7100397:105725281:T:C	-426	36	38	0.184466	1.71386e-07	0.443107	0.078874	0.000126849
cg22740801	rs10748859:105725722:T:C	15	36	38	0.184466	2.86996e-07	0.434941	0.0790754	0.00018403
cg22740801	rs6584583:105726338:T:C	631	33	34	0.165049	0.000100591	0.359846	0.0888494	0.0134499
cg22740801	rs10786779:105726812:A:G	1105	36	38	0.184466	1.86946e-07	0.441674	0.0788961	0.000135214
cg22740801	rs4917407:105727874:A:G	2167	30	31	0.150485	0.000212514	0.352605	0.0917505	0.0229081
cg22740801	rs7096960:105728162:G:A	2455	35	36	0.174757	5.30783e-06	0.408779	0.0850037	0.00155044
cg22740801	rs7097109:105728280:G:A	2573	35	36	0.174757	5.30783e-06	0.408779	0.0850037	0.00155044
cg22740801	rs10786780:105729020:C:T	3313	35	36	0.174757	5.30377e-06	0.409261	0.0851005	0.00154977
cg22740801	rs4918076:105729054:C:G	3347	35	36	0.174757	5.30783e-06	0.408779	0.0850037	0.00155044
cg22740801	rs9325510	4180	35	36	0.174757	5.30783e-06	0.408779	0.0850037	0.00155044
cg22740801	rs2066340:105730446:A:G	4739	35	36	0.174757	5.30783e-06	0.408779	0.0850037	0.00155044
cg22740801	rs138183981:105731013:TTTG:T	5306	35	36	0.174757	5.30783e-06	0.408779	0.0850037	0.00155044
cg22740801	rs2864007:105731034:G:T	5327	35	36	0.174757	5.30783e-06	0.408779	0.0850037	0.00155044
cg22740801	rs2864006:105731088:T:C	5381	35	36	0.174757	5.30783e-06	0.408779	0.0850037	0.00155044
cg22740801	rs9988675:105731338:G:A	5631	35	36	0.174757	5.30783e-06	0.408779	0.0850037	0.00155044
cg22740801	rs11191887:105734894:C:A	9187	37	39	0.18932	6.11362e-07	0.421575	0.07916	0.000320605
cg15439100	rs805690:105814459:A:C	-9882	62	79	0.383495	1.55489e-05	-0.183041	0.0403135	0.00344766
cg15439100	rs805691:105814826:C:A	-9515	62	79	0.383495	1.56168e-05	-0.182978	0.0403095	0.0034599
cg15439100	rs805692:105814937:C:T	-9404	60	74	0.359223	0.000133845	-0.169463	0.0426663	0.0164856
cg15439100	rs805695:105816066:C:T	-8275	62	79	0.383495	1.62586e-05	-0.182162	0.0402203	0.00356311
cg15439100	rs12267001:105816274:A:C	-8067	32	35	0.169903	6.64044e-05	0.228759	0.0549616	0.00993819
cg15439100	rs805701	-4385	63	81	0.393204	7.16967e-05	-0.167054	0.0403357	0.0104981
cg15439100	rs805708:105824333:G:A	-8	60	76	0.368932	1.30385e-05	-0.184973	0.0403428	0.00301912
cg15439100	rs77840595:105824918:G:A	577	26	28	0.135922	2.97123e-05	0.26203	0.0599044	0.00552034
cg15439100	rs2476960:105828658:G:A	4317	60	75	0.364078	1.23594e-05	-0.188446	0.0409795	0.00290004
cg15439100	rs11191916:105832350:C:T	8009	26	28	0.135922	3.47216e-05	0.259488	0.0598787	0.00617084
cg21794496	rs200337654:105889249:A:AGATGGTCTC	-9906	40	48	0.23301	2.59982e-05	-0.22833	0.0517904	0.00501662
cg21794496	rs11191929:105889334:T:A	-9821	30	32	0.15534	2.89218e-06	-0.320583	0.0646729	0.000991558
cg21794496	rs10786784:105892104:A:G	-7051	40	48	0.23301	2.28407e-05	-0.230552	0.0519013	0.00456018
cg21794496	rs4319444:105894606:A:G	-4549	40	48	0.23301	2.5343e-05	-0.228427	0.0517351	0.00492433
cg21794496	rs57102591:105894942:AT:A	-4213	40	48	0.23301	2.50018e-05	-0.228559	0.0517239	0.00487477
cg21794496	rs4564255:105895218:G:A	-3937	40	48	0.23301	2.50018e-05	-0.228559	0.0517239	0.00487477
cg21794496	rs112496841:105895939:A:C	-3216	38	45	0.218447	3.89324e-05	-0.229944	0.0534306	0.00671196
cg21794496	rs6584588:105899171:C:T	16	40	48	0.23301	2.50018e-05	-0.228559	0.0517239	0.00487477
cg21794496	rs637022:105901936:G:A	2781	40	48	0.23301	2.50018e-05	-0.228559	0.0517239	0.00487477
cg21794496	rs668349:105904138:A:G	4983	40	49	0.237864	6.55863e-05	-0.212213	0.0509457	0.00984753
cg21794496	rs12221084:105904177:G:A	5022	30	32	0.15534	2.79334e-06	-0.321027	0.0646529	0.000966289
cg21794496	rs584073:105904192:A:G	5037	40	48	0.23301	2.4666e-05	-0.22869	0.0517127	0.00482649
cg21794496	rs680026:105904375:C:T	5220	40	48	0.23301	2.4666e-05	-0.22869	0.0517127	0.00482649
cg21794496	rs141870801:105905380:TGAC:T	6225	40	48	0.23301	2.4666e-05	-0.22869	0.0517127	0.00482649
cg21794496	rs604178:105906924:C:T	7769	40	48	0.23301	2.40108e-05	-0.228948	0.0516898	0.00473181
cg21794496	rs11191932:105908597:G:A	9442	30	32	0.15534	2.42045e-06	-0.322685	0.0645377	0.00086754
cg26685033	rs12775992:105941325:C:T	-4939	47	52	0.252427	0.000411808	0.122079	0.0334111	0.0362937
cg26685033	rs10883977:105946252:A:G	-12	47	52	0.252427	0.000412625	0.122053	0.033409	0.0363399
cg26685033	rs726934:105950609:T:C	4345	47	52	0.252427	0.000406407	0.122241	0.0334201	0.0359695
cg26685033	rs34139214:105952965:T:C	6701	47	52	0.252427	0.000406407	0.122241	0.0334201	0.0359695
cg16802990	rs581686:105983356:C:T	-8571	71	96	0.466019	1.60122e-05	-0.291338	0.0642707	0.00352353
cg16802990	rs11191954:105983417:A:G	-8510	29	30	0.145631	0.000272704	-0.376772	0.0998737	0.0272865
cg16802990	rs11191957:105984164:G:A	-7763	29	30	0.145631	0.000277157	-0.376163	0.0998345	0.0275953
cg16802990	rs7098122:105986707:C:T	-5220	71	95	0.461165	1.59938e-05	-0.291508	0.0643042	0.00352036
cg16802990	rs17752045:105987542:A:C	-4385	29	30	0.145631	0.000277599	-0.376189	0.0998535	0.0276262
cg16802990	rs77995759:105987912:T:C	-4015	29	30	0.145631	0.000277599	-0.376189	0.0998535	0.0276262
cg16802990	rs687557:105989509:T:A	-2418	71	95	0.461165	1.61419e-05	-0.291483	0.0643318	0.00354352
cg20537488	rs2164624:106013445:G:A	-501	45	59	0.286408	0.000614152	-0.118872	0.0336142	0.047734
cg20537488	rs144343542:106014764:CCGG:C	818	39	51	0.247573	0.000286851	-0.131247	0.0349242	0.0282636
cg24598761	rs17883150:106013050:G:A	-1207	43	55	0.26699	0.000396117	-0.14448	0.0394199	0.0353457
cg24598761	rs2164624:106013445:G:A	-812	45	59	0.286408	9.87186e-05	-0.151004	0.0372372	0.0132758
cg24598761	rs144343542:106014764:CCGG:C	507	39	51	0.247573	0.000541979	-0.141462	0.0395874	0.0437996
cg24598761	rs10883990:106018558:A:G	4301	43	55	0.26699	0.000466814	-0.140948	0.0389651	0.0395093
cg24598761	rs4925	8532	43	55	0.26699	0.000461848	-0.140709	0.0388656	0.0392114
cg00899160	rs11191979:106024867:T:C	-9606	43	55	0.26699	6.68604e-05	0.246151	0.0591662	0.00998764
cg00899160	rs1147611:106025258:G:T	-9215	61	88	0.427184	0.000464711	0.18818	0.0520036	0.0393854
cg00899160	rs45596840:106028154:G:A	-6319	43	55	0.26699	6.71485e-05	0.246066	0.0591622	0.0100201
cg00899160	rs641071:106028157:G:T	-6316	61	88	0.427184	0.000466041	0.188052	0.0519802	0.0394631
cg00899160	rs11191980:106032213:T:C	-2260	41	51	0.247573	1.51576e-05	0.276054	0.0607124	0.00338098
cg00899160	rs568526:106033439:T:C	-1034	59	84	0.407767	0.000246879	0.198147	0.0521337	0.0254969
cg00899160	rs17826034:106033504:A:G	-969	41	51	0.247573	1.52338e-05	0.27596	0.0607087	0.00339366
cg00899160	rs2297235:106034491:A:G	18	41	51	0.247573	1.51576e-05	0.276054	0.0607124	0.00338098
cg00899160	rs276204:106035313:C:G	840	59	84	0.407767	0.000245783	0.198177	0.0521243	0.0254185
cg00899160	rs7099030:106038347:T:C	3874	54	73	0.354369	0.000129126	0.216942	0.0544846	0.0160811
cg00899160	rs156697	4712	59	84	0.407767	0.000246681	0.198021	0.0520973	0.0254836
cg00899160	rs276203:106039303:A:G	4830	59	84	0.407767	0.000246681	0.198021	0.0520973	0.0254836
cg00899160	rs6584592:106039780:C:T	5307	54	73	0.354369	0.000115465	0.219243	0.0546412	0.0148433
cg00899160	rs1865926:106042502:G:T	8029	44	55	0.26699	1.91806e-05	0.270862	0.0603668	0.00401375
cg00899160	rs7079338:106043132:C:T	8659	42	52	0.252427	2.64164e-05	0.272391	0.0618423	0.00507421
cg04447284	rs11191980:106032213:T:C	-2363	41	51	0.247573	0.000599488	0.191835	0.0541363	0.0469422
cg04447284	rs17826034:106033504:A:G	-1072	41	51	0.247573	0.00060169	0.191762	0.0541323	0.0470595
cg04447284	rs2297235:106034491:A:G	-85	41	51	0.247573	0.000599488	0.191835	0.0541363	0.0469422
cg04447284	rs1865926:106042502:G:T	7926	44	55	0.26699	0.000236644	0.203013	0.0532459	0.0247363
cg23487032	rs11191979:106024867:T:C	-9933	43	55	0.26699	2.11363e-05	0.222984	0.0499734	0.00430847
cg23487032	rs1147611:106025258:G:T	-9542	61	88	0.427184	0.000191359	0.17054	0.0440384	0.0212669
cg23487032	rs45596840:106028154:G:A	-6646	43	55	0.26699	2.10723e-05	0.222993	0.0499666	0.00430069
cg23487032	rs641071:106028157:G:T	-6643	61	88	0.427184	0.000187503	0.170677	0.044009	0.020969
cg23487032	rs11191980:106032213:T:C	-2587	41	51	0.247573	1.47688e-05	0.235996	0.0518273	0.00331452
cg23487032	rs568526:106033439:T:C	-1361	59	84	0.407767	0.000222386	0.17034	0.0444717	0.0236697
cg23487032	rs17826034:106033504:A:G	-1296	41	51	0.247573	1.47205e-05	0.236006	0.0518201	0.00330933
cg23487032	rs2297235:106034491:A:G	-309	41	51	0.247573	1.47688e-05	0.235996	0.0518273	0.00331452
cg23487032	rs276204:106035313:C:G	513	59	84	0.407767	0.000219643	0.170452	0.0444604	0.0234535
cg23487032	rs7099030:106038347:T:C	3547	54	73	0.354369	3.13247e-05	0.200168	0.045906	0.00573309
cg23487032	rs156697	4385	59	84	0.407767	0.000214824	0.1706	0.0444266	0.0230825
cg23487032	rs276203:106039303:A:G	4503	59	84	0.407767	0.000214824	0.1706	0.0444266	0.0230825
cg23487032	rs6584592:106039780:C:T	4980	54	73	0.354369	2.98766e-05	0.201432	0.0460657	0.00554193
cg23487032	rs1865926:106042502:G:T	7702	44	55	0.26699	2.15215e-05	0.230008	0.0516013	0.00436365
cg23487032	rs7079338:106043132:C:T	8332	42	52	0.252427	6.08511e-05	0.222763	0.0532225	0.00931005
cg17733466	rs11191979:106024867:T:C	-9936	43	55	0.26699	8.63752e-06	0.285201	0.0608314	0.00223097
cg17733466	rs1147611:106025258:G:T	-9545	61	88	0.427184	2.45181e-05	0.234591	0.0530286	0.0048064
cg17733466	rs45596840:106028154:G:A	-6649	43	55	0.26699	8.6388e-06	0.285169	0.0608249	0.00223127
cg17733466	rs641071:106028157:G:T	-6646	61	88	0.427184	2.38783e-05	0.234782	0.0529901	0.00471166
cg17733466	rs11191980:106032213:T:C	-2590	41	51	0.247573	2.59978e-06	0.311832	0.0625827	0.000914749
cg17733466	rs568526:106033439:T:C	-1364	59	84	0.407767	1.5468e-05	0.241814	0.0532423	0.00343438
cg17733466	rs17826034:106033504:A:G	-1299	41	51	0.247573	2.60031e-06	0.311797	0.0625761	0.000914749
cg17733466	rs2297235:106034491:A:G	-312	41	51	0.247573	2.59978e-06	0.311832	0.0625827	0.000914749
cg17733466	rs276204:106035313:C:G	510	59	84	0.407767	1.50238e-05	0.242107	0.0532202	0.0033585
cg17733466	rs157077:106037894:T:C	3091	72	103	0.5	0.000161806	0.219815	0.056085	0.0188737
cg17733466	rs7099030:106038347:T:C	3544	54	73	0.354369	5.55387e-06	0.265987	0.0554392	0.00160515
cg17733466	rs156697	4382	59	84	0.407767	1.4531e-05	0.242347	0.053174	0.00327596
cg17733466	rs276203:106039303:A:G	4500	59	84	0.407767	1.4531e-05	0.242347	0.053174	0.00327596
cg17733466	rs6584592:106039780:C:T	4977	54	73	0.354369	5.10751e-06	0.267964	0.0556125	0.00150688
cg17733466	rs1865926:106042502:G:T	7699	44	55	0.26699	6.03658e-07	0.326248	0.0612263	0.00031779
cg17733466	rs7079338:106043132:C:T	8329	42	52	0.252427	5.16018e-06	0.307393	0.0638288	0.00151806
cg17383262	rs1147611:106025258:G:T	-9660	61	88	0.427184	0.000125	0.14597	0.0365781	0.0157046
cg17383262	rs641071:106028157:G:T	-6761	61	88	0.427184	0.000123267	0.146022	0.0365559	0.0155554
cg17383262	rs11191980:106032213:T:C	-2705	41	51	0.247573	0.000638207	0.157828	0.0447746	0.049005
cg17383262	rs568526:106033439:T:C	-1479	59	84	0.407767	4.20922e-05	0.156378	0.0365103	0.00710536
cg17383262	rs17826034:106033504:A:G	-1414	41	51	0.247573	0.000638504	0.157806	0.04477	0.049018
cg17383262	rs2297235:106034491:A:G	-427	41	51	0.247573	0.000638207	0.157828	0.0447746	0.049005
cg17383262	rs276204:106035313:C:G	395	59	84	0.407767	4.13857e-05	0.156493	0.0364994	0.00701321
cg17383262	rs7099030:106038347:T:C	3429	54	73	0.354369	8.06459e-05	0.158745	0.0386245	0.0114558
cg17383262	rs156697	4267	59	84	0.407767	4.09525e-05	0.156492	0.0364756	0.00695959
cg17383262	rs276203:106039303:A:G	4385	59	84	0.407767	4.09525e-05	0.156492	0.0364756	0.00695959
cg17383262	rs6584592:106039780:C:T	4862	54	73	0.354369	7.10412e-05	0.1605	0.03873	0.0104289
cg17383262	rs1865926:106042502:G:T	7584	44	55	0.26699	0.000131691	0.174051	0.043772	0.0162993
cg17383262	rs7079338:106043132:C:T	8214	42	52	0.252427	0.000630219	0.160073	0.0453632	0.0485982
cg23659134	rs1147611:106025258:G:T	-9911	61	88	0.427184	1.88615e-07	0.337412	0.0602935	0.000136053
cg23659134	rs45596840:106028154:G:A	-7015	43	55	0.26699	8.92592e-06	0.339179	0.072471	0.00228847
cg23659134	rs641071:106028157:G:T	-7012	61	88	0.427184	1.849e-07	0.337459	0.0602533	0.00013423
cg23659134	rs11191980:106032213:T:C	-2956	41	51	0.247573	1.21328e-06	0.382195	0.074001	0.000525217
cg23659134	rs568526:106033439:T:C	-1730	59	84	0.407767	4.76719e-08	0.354307	0.0600013	5.02764e-05
cg23659134	rs17826034:106033504:A:G	-1665	41	51	0.247573	1.21337e-06	0.382153	0.0739932	0.000525235
cg23659134	rs2297235:106034491:A:G	-678	41	51	0.247573	1.21328e-06	0.382195	0.074001	0.000525217
cg23659134	rs276204:106035313:C:G	144	59	84	0.407767	4.74638e-08	0.354301	0.0599905	5.0133e-05
cg23659134	rs157077:106037894:T:C	2725	72	103	0.5	5.02352e-06	0.311753	0.0646456	0.00148851
cg23659134	rs7099030:106038347:T:C	3178	54	73	0.354369	8.50965e-09	0.389796	0.0620471	1.53989e-05
cg23659134	rs156697	4016	59	84	0.407767	4.62949e-08	0.354351	0.0599429	4.92521e-05
cg23659134	rs276203:106039303:A:G	4134	59	84	0.407767	4.62949e-08	0.354351	0.0599429	4.92521e-05
cg23659134	rs6584592:106039780:C:T	4611	54	73	0.354369	6.94148e-09	0.393292	0.0621682	1.33639e-05
cg23659134	rs1865926:106042502:G:T	7333	44	55	0.26699	1.34856e-06	0.377716	0.0734901	0.000567768
cg23659134	rs7079338:106043132:C:T	7963	42	52	0.252427	2.00453e-06	0.380124	0.0753436	0.000759484
cg07488549	rs7079338:106043132:C:T	-9845	42	52	0.252427	6.13214e-06	-0.322538	0.0675699	0.00173308
cg07488549	rs35528873:106045962:GT:G	-7015	55	78	0.378641	3.38809e-06	-0.275896	0.056092	0.00111116
cg07488549	rs276210:106046403:A:G	-6574	55	78	0.378641	3.37431e-06	-0.275975	0.0560966	0.00110804
cg07488549	rs987247:106046768:T:C	-6209	42	52	0.252427	6.01038e-06	-0.323171	0.0676323	0.00170627
cg07488549	rs157076:106048294:C:G	-4683	56	78	0.378641	4.82897e-06	-0.273727	0.0566468	0.00144422
cg07488549	rs11191989:106050315:T:C	-2662	40	49	0.237864	7.19923e-06	-0.323509	0.0683417	0.00195225
cg07488549	10:106053321:A:ATTTTTTTT	344	55	75	0.364078	4.67123e-07	-0.306377	0.0568618	0.000262632
cg07488549	rs156699	664	56	79	0.383495	2.27294e-06	-0.27923	0.0556783	0.000827765
cg07488549	rs157081:106055024:C:T	2047	56	79	0.383495	2.28876e-06	-0.279242	0.0556992	0.000831812
cg07488549	rs157080:106055963:C:A	2986	56	79	0.383495	2.25602e-06	-0.279376	0.0556875	0.00082387
cg07488549	rs3740466:106061169:C:T	8192	42	51	0.247573	4.79431e-06	-0.329445	0.0681524	0.0014367
cg13071553	rs157081:106055024:C:T	-9471	56	79	0.383495	2.18955e-05	-0.0817059	0.0183485	0.00441987
cg13071553	rs157080:106055963:C:A	-8532	56	79	0.383495	2.17096e-05	-0.0817336	0.0183457	0.00439126
cg13071553	rs505701:106073566:T:C	9071	56	79	0.383495	2.32227e-05	-0.0817159	0.0184134	0.00461615
cg06419249	rs276229:106081936:A:G	8284	18	21	0.101942	0.000169145	0.125172	0.0320379	0.0194686
cg06419249	rs276228:106081946:T:C	8294	18	21	0.101942	0.000169145	0.125172	0.0320379	0.0194686
cg00716368	rs111454902:106342161:C:G	400	12	12	0.0582524	0.000341043	0.339491	0.0915458	0.0318205
cg00716368	rs7894810:106349107:A:G	7346	12	12	0.0582524	0.000342311	0.335819	0.0905817	0.0319034
cg16329730	rs1032316:106580103:G:C	-4649	31	32	0.15534	0.000345001	-0.226161	0.0610403	0.032083
cg16329730	rs11192196:106584326:G:A	-426	29	29	0.140777	1.2834e-05	-0.292714	0.0637854	0.00298304
cg16329730	rs11192197:106584753:C:T	1	26	26	0.126214	3.58882e-05	-0.285811	0.0660846	0.00632372
cg16329730	rs11192198:106584816:A:T	64	29	29	0.140777	1.2834e-05	-0.292714	0.0637854	0.00298304
cg16329730	rs1490180:106586241:A:G	1489	29	29	0.140777	1.2834e-05	-0.292714	0.0637854	0.00298304
cg16329730	rs1490179:106586245:A:G	1493	26	26	0.126214	3.58882e-05	-0.285811	0.0660846	0.00632372
cg16329730	rs1490178:106586307:G:A	1555	29	29	0.140777	1.2834e-05	-0.292714	0.0637854	0.00298304
cg16329730	rs11192199:106586967:A:G	2215	29	29	0.140777	1.2834e-05	-0.292714	0.0637854	0.00298304
cg16329730	rs59433362:106587090:TA:T	2338	26	26	0.126214	3.58882e-05	-0.285811	0.0660846	0.00632372
cg16329730	rs4503461:106587717:A:C	2965	29	29	0.140777	1.2834e-05	-0.292714	0.0637854	0.00298304
cg16329730	rs60156952:106588147:G:A	3395	29	29	0.140777	1.2834e-05	-0.292714	0.0637854	0.00298304
cg16329730	rs4918129:106588976:G:A	4224	29	29	0.140777	1.22227e-05	-0.293059	0.0636898	0.00287553
cg16329730	rs11192200:106590680:C:T	5928	26	26	0.126214	3.42516e-05	-0.286166	0.0659807	0.00610872
cg16329730	rs12354778:106590802:G:A	6050	26	26	0.126214	3.42516e-05	-0.286166	0.0659807	0.00610872
cg16329730	rs4917430:106593576:C:T	8824	26	26	0.126214	3.43845e-05	-0.286076	0.0659754	0.00612587
cg21310403	rs1870461	-9298	68	94	0.456311	0.000244484	-0.181424	0.0476991	0.0253196
cg21310403	rs1870460:107252612:T:C	-9148	68	94	0.456311	0.000241788	-0.181652	0.0477196	0.0251284
cg21310403	10:107252997:T:<CN0>:0	-8763	68	94	0.456311	0.000248796	-0.181495	0.0477801	0.0256315
cg21310403	rs7915206:107254866:A:G	-6894	68	94	0.456311	0.000241788	-0.181652	0.0477196	0.0251284
cg21310403	rs10786859:107255530:C:A	-6230	68	94	0.456311	0.000241788	-0.181652	0.0477196	0.0251284
cg21310403	rs10786860:107255532:C:T	-6228	68	94	0.456311	0.000241788	-0.181652	0.0477196	0.0251284
cg21310403	rs7080354:107255788:T:G	-5972	68	94	0.456311	0.000241788	-0.181652	0.0477196	0.0251284
cg21310403	rs7096284:107255859:A:G	-5901	68	94	0.456311	0.000241788	-0.181652	0.0477196	0.0251284
cg21310403	rs7096423:107255894:C:G	-5866	68	94	0.456311	0.000241788	-0.181652	0.0477196	0.0251284
cg21310403	rs3982459:107256958:CAT:C	-4802	68	94	0.456311	0.000241788	-0.181652	0.0477196	0.0251284
cg21310403	rs1993643:107257029:T:C	-4731	68	94	0.456311	0.000241788	-0.181652	0.0477196	0.0251284
cg21310403	rs4918160:107257089:C:T	-4671	68	94	0.456311	0.000241788	-0.181652	0.0477196	0.0251284
cg21310403	rs1993642:107257344:T:C	-4416	68	94	0.456311	0.000241788	-0.181652	0.0477196	0.0251284
cg21310403	rs10786861:107258073:T:C	-3687	68	94	0.456311	0.000241788	-0.181652	0.0477196	0.0251284
cg21310403	rs10884153:107258192:C:T	-3568	68	94	0.456311	0.000241788	-0.181652	0.0477196	0.0251284
cg21310403	rs10786862:107258378:C:T	-3382	68	94	0.456311	0.000238069	-0.181932	0.0477383	0.0248452
cg21310403	rs10786863:107258386:A:G	-3374	68	94	0.456311	0.000238069	-0.181932	0.0477383	0.0248452
cg21310403	rs7901334:107258715:A:G	-3045	68	94	0.456311	0.000241788	-0.181652	0.0477196	0.0251284
cg21310403	rs10748878:107258730:C:T	-3030	68	94	0.456311	0.000241788	-0.181652	0.0477196	0.0251284
cg21310403	rs7901916:107258916:G:A	-2844	68	94	0.456311	0.000226187	-0.182334	0.0476626	0.0239507
cg21310403	rs7901917:107258919:G:T	-2841	68	94	0.456311	0.000241788	-0.181652	0.0477196	0.0251284
cg21310403	rs7901702:107258926:C:G	-2834	68	94	0.456311	0.000241788	-0.181652	0.0477196	0.0251284
cg21310403	rs7901968:107259123:C:T	-2637	68	94	0.456311	0.000241788	-0.181652	0.0477196	0.0251284
cg21310403	rs10884154:107259723:G:A	-2037	68	94	0.456311	0.000214871	-0.182997	0.0476558	0.0230866
cg21310403	rs34433137:107259755:C:T	-2005	68	94	0.456311	0.000214871	-0.182997	0.0476558	0.0230866
cg21310403	rs34309458:107259757:A:AT	-2003	68	94	0.456311	0.000214871	-0.182997	0.0476558	0.0230866
cg21310403	rs10884155:107259770:C:A	-1990	68	94	0.456311	0.000214871	-0.182997	0.0476558	0.0230866
cg21310403	rs7475548:107261770:C:T	10	68	95	0.461165	0.000148289	-0.185671	0.0470824	0.0177587
cg21310403	rs11403574:107262469:T:TA	709	68	95	0.461165	0.000149676	-0.185628	0.0471024	0.0178727
cg21310403	rs78336036:107262800:C:CATA	1040	68	95	0.461165	0.000149676	-0.185628	0.0471024	0.0178727
cg21310403	rs10884157:107262921:T:C	1161	68	95	0.461165	0.000149676	-0.185628	0.0471024	0.0178727
cg21310403	rs10786864:107263003:T:A	1243	68	95	0.461165	0.000148975	-0.185713	0.0471084	0.0178144
cg21310403	rs10786865:107263114:A:C	1354	68	95	0.461165	0.000149028	-0.18571	0.0471089	0.0178194
cg21310403	rs10786866:107263403:A:C	1643	68	95	0.461165	0.000149892	-0.185646	0.0471118	0.017891
cg21310403	rs10884158:107263570:A:G	1810	68	94	0.456311	7.51332e-05	-0.195141	0.0472608	0.0108731
cg21310403	rs898256:107264821:A:T	3061	68	95	0.461165	0.000150753	-0.185674	0.0471377	0.0179659
cg21310403	rs898255:107265041:A:G	3281	68	93	0.451456	0.000125636	-0.191485	0.0480003	0.0157621
cg21310403	rs4430437:107266374:G:A	4614	66	86	0.417476	7.06199e-05	-0.206748	0.0498708	0.0103881
cg21310403	rs5787590:107266725:C:CAAAG	4965	68	95	0.461165	0.00015184	-0.185717	0.0471725	0.0180442
cg21310403	rs766837:107266999:A:G	5239	67	92	0.446602	9.56505e-05	-0.193369	0.0475838	0.0129764
cg21310403	rs994415:107267341:G:A	5581	68	95	0.461165	0.000152434	-0.18573	0.0471888	0.0180973
cg21310403	rs7896007:107267584:G:A	5824	68	94	0.456311	7.68355e-05	-0.195194	0.0473428	0.0110597
cg21310403	rs1967377:107267847:T:C	6087	67	92	0.446602	9.59485e-05	-0.193401	0.0476016	0.0130062
cg21310403	rs1967378:107267859:C:A	6099	68	95	0.461165	0.000165	-0.185091	0.0472907	0.0191363
cg21310403	rs1971233:107268046:T:G	6286	67	92	0.446602	9.61583e-05	-0.193408	0.0476102	0.0130262
cg21310403	rs1971234:107268112:C:T	6352	67	92	0.446602	9.61583e-05	-0.193408	0.0476102	0.0130262
cg21310403	rs10732796:107269317:T:C	7557	66	86	0.417476	7.49227e-05	-0.206839	0.0500848	0.0108513
cg21310403	rs11192462:107269419:A:T	7659	17	18	0.0873786	0.000464034	-0.328234	0.0906967	0.0393446
cg21310403	rs10884160:107269678:C:T	7918	23	24	0.116505	0.000402029	-0.301257	0.0822916	0.0357046
cg21310403	rs10884162:107269897:T:C	8137	20	21	0.101942	0.000104365	-0.342773	0.0848441	0.0137956
cg21310403	rs977980:107270764:C:T	9004	19	20	0.0970874	0.00010548	-0.348317	0.0862784	0.0139069
cg18758405	rs12774894:107448020:A:G	-3287	35	43	0.208738	0.000181252	-0.176775	0.0454704	0.020477
cg18758405	rs12771120:107451002:A:C	-305	35	43	0.208738	0.000180555	-0.176801	0.0454645	0.020417
cg18758405	rs61875400:107453304:C:T	1997	35	43	0.208738	0.000180555	-0.176801	0.0454645	0.020417
cg25833566	rs4918198:107890675:C:T	-8116	42	47	0.228155	0.000601879	0.292069	0.08245	0.0470697
cg25833566	rs1929312:107892600:C:A	-6191	42	47	0.228155	0.000656505	0.289603	0.0823549	0.0499658
cg25833566	rs7088300:107892763:T:C	-6028	42	47	0.228155	0.000606092	0.292336	0.0825736	0.0472884
cg25833566	rs36117056:107893135:T:TG	-5656	42	47	0.228155	0.000602976	0.294742	0.0832175	0.0471308
cg25833566	rs10748892:107894462:G:T	-4329	43	48	0.23301	0.000260313	0.307846	0.0813179	0.0264393
cg25833566	rs12783189:107895868:G:A	-2923	42	47	0.228155	0.000653355	0.29099	0.0827154	0.049798
cg25833566	rs7474687:107895912:T:A	-2879	42	47	0.228155	0.000653355	0.29099	0.0827154	0.049798
cg03223989	rs113968974:108931474:A:G	6926	13	13	0.0631068	0.000279972	-0.353618	0.0939228	0.0277935
cg06370132	rs4333960:110543914:A:T	-6157	56	67	0.325243	0.000350665	-0.133506	0.0360788	0.0324389
cg06370132	rs12572477:110545078:C:G	-4993	56	67	0.325243	0.000358277	-0.133428	0.0361182	0.0329281
cg06370132	rs12572486:110545082:G:C	-4989	56	67	0.325243	0.000362713	-0.133178	0.0360851	0.0332169
cg06370132	rs11593382:110546062:A:G	-4009	56	66	0.320388	0.000335441	-0.134182	0.0361366	0.0314564
cg06370132	rs7901688:110556133:G:A	6062	42	45	0.218447	0.000524847	-0.152999	0.0427029	0.0428403
cg06370132	rs11194266:110557021:T:G	6950	57	67	0.325243	0.000273505	-0.136221	0.036117	0.0273434
cg02869444	rs199925893:110988765:C:G	-9996	27	34	0.165049	9.0438e-05	-0.168867	0.0413996	0.0124461
cg02869444	rs10509892:110989730:G:A	-9031	46	58	0.281553	1.77162e-05	-0.16022	0.0355474	0.00378824
cg02869444	rs10748989:110990405:T:C	-8356	49	61	0.296117	0.000131389	-0.144834	0.0364184	0.0162733
cg02869444	rs10787139:110990439:C:T	-8322	32	39	0.18932	2.18371e-05	-0.180652	0.0405623	0.00441116
cg02869444	rs10787140:110991026:G:A	-7735	32	39	0.18932	2.17752e-05	-0.180614	0.0405473	0.00440151
cg02869444	rs11194490:110991233:G:C	-7528	32	39	0.18932	2.15956e-05	-0.180935	0.0406	0.00437439
cg02869444	rs7906828:110991714:G:A	-7047	46	58	0.281553	1.74328e-05	-0.160274	0.035527	0.00374629
cg02869444	rs9988753:110992456:G:A	-6305	32	39	0.18932	2.14575e-05	-0.18069	0.0405299	0.00435521
cg02869444	rs1324289:110992614:T:G	-6147	52	66	0.320388	0.000362356	0.131795	0.0357078	0.0331937
cg02869444	rs17126024:110993508:A:T	-5253	27	34	0.165049	0.000139934	-0.166473	0.0420434	0.0170281
cg02869444	rs4918416:110993706:T:C	-5055	49	63	0.305825	6.63741e-05	0.145223	0.0348903	0.00993483
cg02869444	rs7916127:110994031:G:A	-4730	52	66	0.320388	0.000362156	0.13213	0.0357968	0.0331808
cg02869444	rs4917536	-4243	52	66	0.320388	0.000362356	0.131795	0.0357078	0.0331937
cg02869444	rs4265533:110995939:G:A	-2822	56	74	0.359223	0.000592634	0.120907	0.0340875	0.0465722
cg02869444	rs3903866:110996486:G:A	-2275	52	66	0.320388	0.000362356	0.131795	0.0357078	0.0331937
cg02869444	rs7897352:110996532:G:A	-2229	32	39	0.18932	2.12885e-05	-0.180757	0.0405265	0.00432939
cg02869444	rs72833523:110996539:A:G	-2222	27	34	0.165049	0.000138911	-0.166547	0.0420406	0.0169394
cg02869444	rs17126045:110997570:T:C	-1191	27	34	0.165049	0.000138979	-0.166515	0.0420338	0.0169446
cg02869444	rs59198009:110997960:A:G	-801	27	34	0.165049	0.00013953	-0.166461	0.0420318	0.016997
cg02869444	rs11592250:110998196:G:A	-565	27	34	0.165049	0.000138522	-0.166533	0.0420288	0.0169057
cg02869444	rs7906628:110998840:G:A	79	48	62	0.300971	0.000346504	0.131829	0.0355925	0.0321781
cg02869444	rs11194497:110999582:T:C	821	27	34	0.165049	0.000139078	-0.166478	0.0420266	0.016953
cg02869444	rs11194498:110999671:T:C	910	27	34	0.165049	0.000139078	-0.166478	0.0420266	0.016953
cg02869444	rs11194500:110999883:G:A	1122	27	34	0.165049	0.000139078	-0.166478	0.0420266	0.016953
cg02869444	rs72833532:111000644:A:C	1883	27	34	0.165049	0.000139078	-0.166478	0.0420266	0.016953
cg02869444	rs11194505:111003617:C:G	4856	27	34	0.165049	0.000140428	-0.166441	0.0420455	0.0170721
cg02869444	rs1969820:111006125:G:A	7364	52	66	0.320388	0.000420891	0.130595	0.0358038	0.0368296
cg02869444	rs58782781:111006898:T:C	8137	26	33	0.160194	0.000197426	-0.163902	0.0424201	0.0217372
cg02869444	rs12218810:111007380:C:T	8619	26	33	0.160194	0.000203297	-0.163611	0.0424352	0.0221801
cg02869444	rs9971178:111007493:C:T	8732	34	41	0.199029	0.000328365	-0.154318	0.0414907	0.0310045
cg02869444	rs11194511:111008513:G:T	9752	26	33	0.160194	0.000209663	-0.163379	0.0424705	0.0226839
cg05278858	rs10884731:111027126:G:C	-9913	29	36	0.174757	3.80134e-06	-0.30426	0.0622125	0.00121206
cg05278858	rs830066	-8152	54	72	0.349515	1.64942e-06	0.252719	0.0496326	0.000658874
cg05278858	rs861224:111029297:C:T	-7742	48	60	0.291262	5.51381e-06	-0.261297	0.0544415	0.00159588
cg05278858	rs2476987:111029340:G:A	-7699	48	60	0.291262	7.40655e-06	-0.259016	0.054799	0.00199502
cg05278858	rs866691:111029349:C:A	-7690	48	60	0.291262	7.40655e-06	-0.259016	0.054799	0.00199502
cg05278858	rs2478450:111029476:C:G	-7563	48	60	0.291262	5.51381e-06	-0.261297	0.0544415	0.00159588
cg05278858	rs12570469:111029501:C:T	-7538	29	36	0.174757	3.80134e-06	-0.30426	0.0622125	0.00121206
cg05278858	rs830065:111029791:T:C	-7248	48	60	0.291262	5.51381e-06	-0.261297	0.0544415	0.00159588
cg05278858	rs1408370:111029895:C:T	-7144	26	33	0.160194	2.28999e-07	-0.340887	0.0613993	0.000155539
cg05278858	rs72818320:111030440:G:A	-6599	26	33	0.160194	2.11891e-07	-0.3425	0.0614938	0.000147172
cg05278858	rs72818321:111030463:G:A	-6576	26	33	0.160194	2.11891e-07	-0.3425	0.0614938	0.000147172
cg05278858	rs2478446:111030752:T:C	-6287	48	60	0.291262	4.89942e-06	-0.263116	0.0544909	0.00146021
cg05278858	rs72818324:111030793:G:A	-6246	29	36	0.174757	3.67517e-06	-0.305483	0.0623579	0.00118196
cg05278858	rs34662607:111030822:CTT:C	-6217	29	36	0.174757	3.21478e-06	-0.307927	0.0624422	0.00106877
cg05278858	rs2476989:111031003:A:G	-6036	48	60	0.291262	4.89942e-06	-0.263116	0.0544909	0.00146021
cg05278858	rs2478445:111031007:T:C	-6032	48	60	0.291262	4.89942e-06	-0.263116	0.0544909	0.00146021
cg05278858	rs2476990:111031021:A:G	-6018	54	72	0.349515	1.47701e-06	-0.254153	0.0496579	0.000606424
cg05278858	rs2476991:111031097:A:G	-5942	51	65	0.315534	2.52437e-06	-0.262476	0.0526022	0.000895516
cg05278858	rs72818326:111031292:G:A	-5747	29	36	0.174757	3.63994e-06	-0.305651	0.0623623	0.00117368
cg05278858	rs12573131:111031324:A:T	-5715	26	33	0.160194	2.09571e-07	-0.342742	0.0615095	0.000146198
cg05278858	rs830062:111031977:T:G	-5062	48	60	0.291262	4.85995e-06	-0.263126	0.0544706	0.00145123
cg05278858	rs830061:111032239:A:G	-4800	48	60	0.291262	4.69357e-06	-0.263796	0.054513	0.00141544
cg05278858	rs830060:111032261:T:C	-4778	48	60	0.291262	4.66286e-06	-0.263887	0.0545136	0.00140862
cg05278858	rs12217421:111032599:C:T	-4440	29	36	0.174757	3.43469e-06	-0.30678	0.062413	0.00112262
cg05278858	rs7075771:111032923:C:T	-4116	31	38	0.184466	5.47219e-08	-0.350056	0.0595907	5.54321e-05
cg05278858	rs1830806:111033505:A:G	-3534	51	67	0.325243	6.26955e-08	-0.287628	0.0492172	6.09555e-05
cg05278858	rs10748992:111035026:A:G	-2013	51	67	0.325243	6.01858e-08	-0.288225	0.0492426	5.93068e-05
cg05278858	rs7914053:111035817:G:A	-1222	26	33	0.160194	1.86097e-07	-0.345333	0.0616752	0.000134868
cg05278858	rs5020981:111036729:T:C	-310	51	67	0.325243	5.70838e-08	-0.288769	0.0492365	5.71038e-05
cg05278858	rs67618860:111037233:GCT:G	194	48	60	0.291262	6.29146e-08	-0.307044	0.0525465	6.113e-05
cg05278858	rs7904172:111037272:T:C	233	51	67	0.325243	5.48394e-08	-0.289378	0.0492653	5.5514e-05
cg05278858	rs57922139:111038267:G:A	1228	54	73	0.354369	4.85582e-07	-0.262783	0.0488524	0.000269891
cg05278858	rs10787144:111038509:A:G	1470	51	68	0.330097	2.38278e-08	-0.29302	0.0483692	3.10974e-05
cg05278858	rs10787145:111038708:T:C	1669	51	68	0.330097	2.38278e-08	-0.29302	0.0483692	3.10974e-05
cg05278858	rs58413319:111038998:G:A	1959	26	34	0.165049	8.06589e-08	-0.347889	0.0601076	7.28552e-05
cg05278858	rs7071407:111039352:C:T	2313	51	67	0.325243	5.36626e-08	-0.289597	0.0492622	5.45975e-05
cg05278858	rs10884732:111039537:A:C	2498	51	67	0.325243	5.36626e-08	-0.289597	0.0492622	5.45975e-05
cg05278858	rs7900683:111040141:C:G	3102	51	67	0.325243	5.35933e-08	-0.289576	0.0492561	5.45424e-05
cg05278858	rs7901278:111040398:G:A	3359	26	33	0.160194	1.61263e-07	-0.34802	0.0617962	0.00012133
cg05278858	rs7904522:111040772:A:G	3733	51	67	0.325243	5.32662e-08	-0.289629	0.0492539	5.43052e-05
cg05278858	rs1926558:111041173:C:T	4134	26	33	0.160194	1.59317e-07	-0.348157	0.0617905	0.000120214
cg05278858	rs11194532:111041352:G:T	4313	26	33	0.160194	1.59317e-07	-0.348157	0.0617905	0.000120214
cg05278858	rs56901007:111041775:A:T	4736	26	33	0.160194	1.59317e-07	-0.348157	0.0617905	0.000120214
cg05278858	rs9651462:111042873:T:C	5834	51	67	0.325243	5.30236e-08	-0.289667	0.0492517	5.41082e-05
cg05278858	rs72818352:111042971:G:A	5932	26	33	0.160194	1.64026e-07	-0.348072	0.0618478	0.000122848
cg05278858	rs72818359:111044414:G:A	7375	26	34	0.165049	6.21564e-08	-0.352263	0.0602572	6.05218e-05
cg05278858	rs10787146:111045572:G:A	8533	51	67	0.325243	1.19116e-07	-0.285062	0.0500091	9.67914e-05
cg05278858	rs11597266:111046701:C:T	9662	38	49	0.237864	1.27811e-07	-0.306895	0.0539898	0.000102307
cg04246070	rs527058:111605675:C:G	-6417	73	94	0.456311	0.000179644	-0.116159	0.0298595	0.020342
cg04246070	rs654796:111606516:C:T	-5576	73	94	0.456311	0.000171936	-0.116502	0.0298537	0.0197053
cg04246070	rs685242:111608677:C:T	-3415	73	94	0.456311	0.000134808	-0.118365	0.029816	0.0165735
cg04246070	rs10884915:111609160:T:C	-2932	73	95	0.461165	9.63705e-05	0.119475	0.0294148	0.0130484
cg04246070	rs57824748:111610517:T:TA	-1575	73	95	0.461165	8.72459e-05	0.120079	0.0293685	0.0121263
cg04246070	rs7902911:111612350:C:T	258	41	48	0.23301	0.000643955	0.120635	0.034249	0.0493156
cg04246070	rs34182538:111614289:A:AG	2197	54	67	0.325243	2.38171e-05	0.132025	0.0297933	0.00470473
cg04246070	rs67701529:111614843:A:G	2751	54	67	0.325243	2.36609e-05	0.132143	0.0298086	0.00468155
cg04246070	rs11194896:111615044:A:G	2952	74	96	0.466019	0.000300836	0.112466	0.0300353	0.0291844
cg00817464	rs1815249:111655790:C:T	-7087	74	103	0.5	2.98356e-06	-0.313285	0.0632967	0.00101389
cg00817464	rs10884916:111658925:T:C	-3952	73	102	0.495146	3.24172e-06	-0.310902	0.0630715	0.00107603
cg00817464	rs1889303:111659454:A:T	-3423	74	101	0.490291	1.17779e-05	-0.300309	0.0651332	0.00279624
cg00817464	rs4918471:111660500:C:A	-2377	52	65	0.315534	5.47428e-05	-0.298457	0.070831	0.00862374
cg00817464	rs6584961:111662143:T:C	-734	74	103	0.5	3.21662e-06	-0.311053	0.0630781	0.00106927
cg00817464	rs7922330:111662322:A:C	-555	52	65	0.315534	5.21486e-05	-0.298803	0.0706969	0.00832174
cg00817464	rs944968:111662938:T:C	61	74	103	0.5	3.25846e-06	-0.310741	0.0630548	0.00108058
cg00817464	rs11194907:111663943:A:G	1066	74	103	0.5	3.3132e-06	-0.31038	0.0630333	0.00109363
cg00817464	rs7078789	1718	74	103	0.5	3.38706e-06	-0.310008	0.0630263	0.00111087
cg00817464	rs944969:111667664:T:C	4787	74	102	0.495146	4.46964e-06	-0.309259	0.0637501	0.00136481
cg00817464	rs3758408:111669132:T:C	6255	74	103	0.5	3.36015e-06	-0.310103	0.0630206	0.00110483
cg00817464	rs3758409:111669239:T:G	6362	44	55	0.26699	0.000522997	-0.262172	0.0731525	0.0427292
cg00817464	rs7899805:111671177:G:A	8300	55	69	0.334951	3.60472e-06	-0.330729	0.0674464	0.00116478
cg00817464	rs7087731:111672028:C:A	9151	74	102	0.495146	4.46964e-06	-0.309259	0.0637501	0.00136481
cg03800838	rs1891374:111966844:C:T	-5081	39	43	0.208738	0.00031958	-0.0813783	0.0218341	0.0304375
cg03800838	rs1342273	1414	39	43	0.208738	0.00033922	-0.0806437	0.021737	0.031698
cg03800838	rs1977830:111975040:T:C	3115	48	53	0.257282	0.000477371	-0.0762042	0.0211049	0.0401271
cg03800838	rs1977829:111975041:G:A	3116	39	43	0.208738	0.00019553	-0.0841542	0.0217651	0.0215989
cg03800838	rs12256823:111977189:G:C	5264	39	43	0.208738	0.000242794	-0.0831503	0.0218502	0.0251976
cg03800838	rs7083406:111979424:C:T	7499	39	43	0.208738	0.000209295	-0.0841232	0.0218651	0.0226545
cg03800838	rs12264946:111981118:C:T	9193	37	41	0.199029	0.000192384	-0.0848072	0.0219082	0.0213507
cg11838011	rs1342273	-4351	39	43	0.208738	0.000167689	-0.134082	0.0342973	0.019353
cg11838011	rs1977829:111975041:G:A	-2649	39	43	0.208738	0.000130013	-0.137051	0.0344364	0.0161598
cg11838011	rs12256823:111977189:G:C	-501	39	43	0.208738	0.000169554	-0.135108	0.0345871	0.0195028
cg11838011	rs7083406:111979424:C:T	1734	39	43	0.208738	0.000175657	-0.135091	0.0346702	0.0200112
cg11838011	rs12264946:111981118:C:T	3428	37	41	0.199029	0.000177163	-0.135392	0.0347687	0.0201434
cg11838011	rs7072547:111982398:G:A	4708	37	41	0.199029	0.00019166	-0.134373	0.0347029	0.0212903
cg11838011	rs4918487:111984756:C:T	7066	35	38	0.184466	0.000406496	-0.133555	0.0365139	0.0359732
cg11838011	rs4917554:111985027:G:C	7337	37	41	0.199029	0.000203046	-0.133777	0.0346941	0.0221614
cg11838011	rs35741140:111985946:G:C	8256	35	38	0.184466	0.000417244	-0.133259	0.0365089	0.0366124
cg11838011	rs12774613:111987071:G:A	9381	35	38	0.184466	0.000412515	-0.133592	0.0365667	0.0363333
cg15021482	rs12413668:111970309:C:T	-8887	22	23	0.11165	0.000100731	-0.175162	0.0432532	0.0134627
cg15021482	rs72830445:111979199:C:T	3	21	23	0.11165	2.17359e-05	-0.181531	0.0407489	0.00439542
cg15021482	rs72830447:111979769:C:T	573	23	25	0.121359	2.29795e-05	-0.180868	0.0407309	0.00458034
cg15021482	rs12414179:111981935:C:A	2739	23	25	0.121359	2.92551e-05	-0.176118	0.0402264	0.00546434
cg15021482	10:111985806:T:TGGGGCGGCA	6610	23	25	0.121359	3.76875e-05	-0.172771	0.0400663	0.0065573
cg15021482	rs374242732:111986676:TGA:T	7480	23	25	0.121359	3.93183e-05	-0.172174	0.040031	0.00676018
cg15021482	rs143664187:111987337:T:TG	8141	25	30	0.145631	0.000259971	-0.131886	0.0348343	0.0264133
cg15021482	rs3838773:111988424:TA:T	9228	23	25	0.121359	4.80107e-05	-0.169855	0.0399807	0.00783125
cg15021482	rs3793885:111988578:T:G	9382	23	25	0.121359	4.39359e-05	-0.170607	0.0399378	0.0073412
cg15021482	rs72830450:111989086:G:T	9890	23	25	0.121359	4.56671e-05	-0.170066	0.0399062	0.00755392
cg15503404	rs1342273	-8973	39	43	0.208738	6.30876e-05	-0.135142	0.0323627	0.00956411
cg15503404	rs1977830:111975040:T:C	-7272	48	53	0.257282	0.000341774	-0.117989	0.0318217	0.0318664
cg15503404	rs1977829:111975041:G:A	-7271	39	43	0.208738	9.63145e-05	-0.132829	0.0327014	0.0130426
cg15503404	rs10656873:111976474:T:TGG	-5838	71	98	0.475728	1.44572e-06	-0.12041	0.0235029	0.000596826
cg15503404	rs12256823:111977189:G:C	-5123	39	43	0.208738	9.02975e-05	-0.133572	0.0327431	0.0124326
cg15503404	rs7083406:111979424:C:T	-2888	39	43	0.208738	0.000113886	-0.132062	0.0328825	0.0146989
cg15503404	rs11195033:111980235:A:G	-2077	71	98	0.475728	1.47462e-06	-0.120272	0.0234977	0.000605765
cg15503404	rs12264946:111981118:C:T	-1194	37	41	0.199029	0.000128763	-0.131467	0.0330113	0.0160496
cg15503404	rs10787226:111981917:A:G	-395	71	98	0.475728	1.49109e-06	-0.120213	0.0234982	0.0006106
cg15503404	rs7072547:111982398:G:A	86	37	41	0.199029	0.000151364	-0.129848	0.0329745	0.0180077
cg15503404	rs1573042:111983060:A:G	748	71	98	0.475728	1.4975e-06	-0.120198	0.0235	0.000612632
cg15503404	rs4918487:111984756:C:T	2444	35	38	0.184466	0.000394266	-0.127456	0.0347621	0.0352245
cg15503404	rs4917554:111985027:G:C	2715	37	41	0.199029	0.000178319	-0.12844	0.0329989	0.0202369
cg15503404	rs35741140:111985946:G:C	3634	35	38	0.184466	0.000418398	-0.126878	0.0347682	0.0366774
cg15503404	rs12774613:111987071:G:A	4759	35	38	0.184466	0.000428761	-0.126872	0.0348348	0.0372927
cg15503404	rs950232:111988373:C:T	6061	71	98	0.475728	1.53459e-06	-0.120072	0.0235021	0.000623712
cg15503404	rs11812839:111989675:G:A	7363	35	38	0.184466	0.000488058	-0.125546	0.0348329	0.0407354
cg15503404	rs10884940:111989799:C:G	7487	65	89	0.432039	4.27691e-07	-0.124456	0.0230112	0.000246252
cg15503404	rs4917555:111991129:C:A	8817	35	38	0.184466	0.000532221	-0.124629	0.0348246	0.0432694
cg00555081	rs10444086	22	55	69	0.334951	0.0001324	0.121626	0.0305991	0.0163595
cg23313755	rs10444086	-1114	55	69	0.334951	1.19995e-08	0.233787	0.0376603	1.96993e-05
cg25135219	rs2419563:112193737:C:G	-31	45	58	0.281553	0.000420536	0.130331	0.035729	0.0368057
cg07226162	rs79878110:112293202:G:A	-46	12	12	0.0582524	7.04543e-06	0.403176	0.0850753	0.00192174
cg16379814	rs72254132:112302473:CAT:C	-3739	56	65	0.315534	0.000125283	0.10383	0.0260224	0.0157283
cg05464378	rs12355893:112307172:T:G	-9945	32	34	0.165049	6.18436e-07	0.502749	0.0944498	0.000323014
cg05464378	rs149819657:112307836:CTTAT:C	-9281	32	34	0.165049	6.18436e-07	0.502749	0.0944498	0.000323014
cg05464378	rs11195176:112310942:C:T	-6175	32	34	0.165049	6.12758e-07	0.502858	0.094432	0.000321132
cg05464378	rs11195177:112311842:A:G	-5275	32	34	0.165049	6.21236e-07	0.502695	0.0944582	0.000324086
cg05464378	rs60857224:112312844:A:C	-4273	32	34	0.165049	6.21236e-07	0.502695	0.0944582	0.000324086
cg05464378	rs1832687:112313537:A:C	-3580	32	34	0.165049	6.21236e-07	0.502695	0.0944582	0.000324086
cg05464378	rs11195179:112314191:A:G	-2926	32	34	0.165049	6.15665e-07	0.502796	0.09444	0.000322099
cg05464378	rs11195180:112314403:G:A	-2714	32	34	0.165049	6.10764e-07	0.503054	0.0944554	0.000320421
cg05464378	rs11195181:112315491:G:C	-1626	32	35	0.169903	8.49886e-08	0.513199	0.0888492	7.57151e-05
cg05464378	rs11195182:112316937:C:T	-180	32	34	0.165049	6.10208e-07	0.502893	0.0944215	0.000320285
cg05464378	rs7090886	-161	33	36	0.174757	3.47047e-07	0.488611	0.0895434	0.000210768
cg05464378	rs73350919:112317095:C:T	-22	32	34	0.165049	6.10208e-07	0.502893	0.0944215	0.000320285
cg05464378	rs79475758:112317144:G:A	27	32	34	0.165049	6.15665e-07	0.502796	0.09444	0.000322099
cg05464378	rs11195183:112318380:C:T	1263	30	31	0.150485	9.98401e-06	0.486709	0.104619	0.00248277
cg16285240	rs11195183:112318380:C:T	-9032	30	31	0.150485	1.25598e-05	0.199079	0.0433301	0.00293537
cg24488739	rs11300793:112428365:GA:G	-3355	74	96	0.466019	1.91786e-06	-0.215222	0.0425693	0.000735653
cg24488739	rs9651417:112428879:C:T	-2841	76	100	0.485437	2.52121e-05	0.190063	0.0430332	0.00490557
cg24488739	rs11195260:112429050:G:A	-2670	71	93	0.451456	0.000226536	0.164624	0.043038	0.0239798
cg24488739	rs9651418	-2656	76	100	0.485437	2.53225e-05	0.189983	0.0430261	0.0049212
cg24488739	rs10885011:112430578:A:T	-1142	67	89	0.432039	0.000501314	0.151751	0.0421957	0.0414808
cg20877679	rs11300793:112428365:GA:G	-3472	74	96	0.466019	0.000415902	-0.13842	0.0379131	0.0365351
cg19249179	rs10885009:112428360:G:A	-3547	63	78	0.378641	0.000647961	0.152981	0.0434552	0.0495211
cg21770758	rs2039876:112435308:G:C	-5087	47	56	0.271845	0.000628892	-0.364434	0.103259	0.0485226
cg26249510	rs74156307:112624798:A:C	5	11	11	0.0533981	0.000334887	-0.296984	0.0799703	0.0314216
cg26249510	rs11597928:112630041:G:C	5248	11	11	0.0533981	0.000336692	-0.295997	0.0797378	0.0315374
cg26249510	rs11813593:112634453:A:C	9660	11	12	0.0582524	0.000122863	-0.275079	0.0688493	0.0155219
cg06860555	rs58164562:112664114:T:C	-8598	24	26	0.126214	0.000192487	0.434182	0.112166	0.0213598
cg06860555	rs7072811:112666952:G:A	-5760	19	20	0.0970874	0.000486141	0.455077	0.126221	0.0406213
cg06860555	rs17128130:112670141:C:T	-2571	20	21	0.101942	0.000232046	0.47945	0.125567	0.0243938
cg06860555	rs74156313:112679859:G:A	7147	19	20	0.0970874	0.000129397	0.503414	0.12645	0.0161036
cg05250818	rs1591469:112983463:A:G	-9842	53	65	0.315534	4.89699e-05	0.132827	0.0313034	0.00793914
cg05250818	rs1360864:112985425:T:C	-7880	67	83	0.402913	4.69561e-05	0.133431	0.0313639	0.00770603
cg05250818	rs5787885:112986080:A:AG	-7225	67	83	0.402913	5.12237e-05	0.132242	0.0312535	0.00820926
cg05250818	rs55829119:112988554:G:T	-4751	46	56	0.271845	2.85367e-05	0.140026	0.0319357	0.00536544
cg05250818	rs144109206:112989159:C:T	-4146	46	56	0.271845	2.89127e-05	0.139948	0.0319428	0.00541878
cg05250818	rs4279941:112989599:C:A	-3706	60	76	0.368932	3.50244e-07	0.156384	0.0286702	0.000212214
cg05250818	rs11195480:112990204:A:G	-3101	64	80	0.38835	1.91277e-06	0.150354	0.0297353	0.000734315
cg05250818	rs12265598:112990293:A:T	-3012	46	56	0.271845	2.85367e-05	0.140026	0.0319357	0.00536544
cg05250818	rs61023573:112992032:G:A	-1273	46	56	0.271845	4.03667e-05	0.137829	0.0320971	0.00689015
cg05250818	rs59593904:112992122:A:AT	-1183	46	56	0.271845	4.01743e-05	0.137913	0.0321074	0.00686576
cg05250818	rs1360863:112992418:C:A	-887	59	75	0.364078	1.49127e-07	0.160372	0.0283871	0.000114305
cg05250818	rs7907114:112993152:A:G	-153	69	90	0.436893	1.45818e-05	0.133965	0.0293993	0.00328506
cg05250818	rs12780725:112993377:C:T	72	60	76	0.368932	5.09822e-07	0.154887	0.0288547	0.000280018
cg05250818	rs72821560:112993380:A:G	75	47	57	0.276699	0.000115451	0.130213	0.0324522	0.0148422
cg05250818	rs35981791:112994132:GA:G	827	59	75	0.364078	1.49127e-07	0.160372	0.0283871	0.000114305
cg05250818	rs1335714:112994252:C:T	947	72	98	0.475728	0.000184818	0.113216	0.0291625	0.0207625
cg05250818	rs17775850:112994448:C:A	1143	60	76	0.368932	5.09822e-07	0.154887	0.0288547	0.000280018
cg05250818	rs71489943:112994787:G:GA	1482	65	85	0.412621	1.00351e-06	0.147242	0.0282639	0.000455971
cg05250818	rs4317914:112995886:G:A	2581	49	61	0.296117	6.84267e-05	0.129398	0.0311493	0.0101546
cg05250818	rs755316:112996265:G:C	2960	65	85	0.412621	1.00351e-06	0.147242	0.0282639	0.000455971
cg05250818	rs2256511:112996845:T:C	3540	71	94	0.456311	1.09826e-05	0.134433	0.0290461	0.00265691
cg05250818	rs5787886:112997290:A:AG	3985	49	61	0.296117	5.04519e-05	0.131272	0.0309948	0.00811723
cg05250818	rs12256434:112997895:G:A	4590	46	56	0.271845	2.89127e-05	0.139948	0.0319428	0.00541878
cg05250818	rs34299378:112998212:TC:T	4907	62	80	0.38835	1.36026e-07	0.158228	0.027905	0.000107295
cg05250818	rs11195482:112998351:G:C	5046	48	60	0.291262	1.76049e-05	0.13812	0.0306332	0.00377139
cg05250818	rs11195483:112998370:C:T	5065	48	60	0.291262	1.76049e-05	0.13812	0.0306332	0.00377139
cg05250818	rs11195484:112998514:A:T	5209	46	56	0.271845	2.89127e-05	0.139948	0.0319428	0.00541878
cg05250818	rs7902225:112998961:C:T	5656	61	79	0.383495	3.87728e-08	0.163231	0.0274303	4.35147e-05
cg05250818	rs4345895:112999860:G:A	6555	69	90	0.436893	1.08469e-05	0.135366	0.0292279	0.00263535
cg05250818	rs11817539:113001595:T:A	8290	66	86	0.417476	1.31402e-05	0.133079	0.029037	0.0030366
cg05250818	rs182631402:113001699:C:A	8394	60	78	0.378641	2.95543e-08	0.164077	0.0272978	3.62307e-05
cg05250818	10:113002255:T:TTA	8950	49	61	0.296117	3.70068e-05	0.133577	0.0309428	0.0064683
cg05250818	rs375021986:113002275:A:T	8970	47	58	0.281553	0.00012806	0.126958	0.031867	0.0159834
cg05250818	rs369087323:113002276:T:G	8971	47	58	0.281553	0.00012806	0.126958	0.031867	0.0159834
cg05250818	rs370209359:113002323:TATATA:T	9018	46	57	0.276699	0.000111085	0.12789	0.0317898	0.0144367
cg05250818	rs4480464:113002546:C:T	9241	63	82	0.398058	1.06897e-06	0.14666	0.0282329	0.000478099
cg05250818	rs200797217:113002652:TTA:T	9347	48	60	0.291262	1.7414e-05	0.138226	0.030638	0.00374389
cg05250818	rs4525161:113002722:T:C	9417	63	82	0.398058	1.06937e-06	0.146653	0.028232	0.000478229
cg05250818	rs12569485:113002963:A:G	9658	48	60	0.291262	1.72977e-05	0.138266	0.0306352	0.00372414
cg05250818	rs12571767:113003262:C:T	9957	50	63	0.305825	0.000258019	0.117319	0.0309694	0.0262766
cg25040937	rs1361140:113487199:G:T	2641	37	38	0.184466	0.000647953	0.200711	0.0570131	0.0495206
cg10566684	rs10885261:113525550:G:C	9025	54	71	0.34466	0.000480666	0.164786	0.0456635	0.0403137
cg24233194	rs11195715	-7217	71	91	0.441748	1.92648e-05	0.194268	0.0433073	0.00402669
cg24233194	rs58985480:113524212:T:C	-2629	70	97	0.470874	6.83258e-05	0.16775	0.0403776	0.0101456
cg18973024	rs10787426:113728434:T:C	-3545	66	79	0.383495	4.3225e-06	-0.281207	0.0578699	0.00133202
cg18973024	rs10885303:113729933:T:G	-2046	66	80	0.38835	7.73806e-06	-0.270059	0.0572671	0.00206267
cg18973024	rs4918708:113733313:A:G	1334	66	78	0.378641	1.54815e-06	-0.296956	0.0581482	0.000628025
cg15710130	rs3824627:113908060:T:C	8896	66	84	0.407767	7.54347e-06	-0.23192	0.0491136	0.00202294
cg18733757	rs11598531:114128629:C:T	-6250	35	37	0.179612	0.000211197	0.149633	0.038918	0.0228051
cg18733757	rs61872333:114130040:G:A	-4839	35	37	0.179612	0.000210617	0.149694	0.038926	0.0227621
cg25780389	rs34817051:114127356:T:G	-7560	47	50	0.242718	0.000190479	-0.168931	0.0436086	0.0211986
cg25780389	rs35230147:114130127:G:A	-4789	47	50	0.242718	0.000190925	-0.168957	0.0436226	0.021234
cg25780389	rs2419621	97	47	50	0.242718	0.000186936	-0.169053	0.0435808	0.0209294
cg14657421	rs943260:114134821:G:A	-5057	17	17	0.0825243	0.000279837	0.235746	0.0626132	0.0277869
cg14657421	rs4341465:114136758:T:C	-3120	17	17	0.0825243	0.000269566	0.236278	0.0625774	0.0270651
cg14657421	rs7076991:114138028:A:G	-1850	19	19	0.092233	8.20118e-05	0.239222	0.0582697	0.0115996
cg14657421	rs1926564:114139896:G:A	18	19	19	0.092233	8.23139e-05	0.23906	0.0582444	0.0116306
cg07252394	rs2277208:114136349:G:C	-7679	76	99	0.480583	5.27899e-08	0.423527	0.0719998	5.39412e-05
cg07252394	rs59242079:114138243:T:G	-5785	76	99	0.480583	5.36339e-08	0.422659	0.0718954	5.4576e-05
cg07252394	rs11195936:114138672:G:A	-5356	66	83	0.402913	2.38805e-06	0.378942	0.0757401	0.000859197
cg07252394	rs9787487:114139014:C:T	-5014	76	99	0.480583	5.25449e-08	0.422823	0.0718675	5.37672e-05
cg07252394	rs11195937:114141245:T:G	-2783	52	57	0.276699	2.36946e-05	-0.401918	0.0906718	0.00468641
cg07252394	rs11195938:114142060:T:C	-1968	76	99	0.480583	5.29623e-08	0.422464	0.0718279	5.40619e-05
cg07252394	rs17129748	-1629	76	99	0.480583	5.18909e-08	0.422625	0.0718	5.33537e-05
cg07252394	rs7075592:114142807:G:A	-1221	76	99	0.480583	6.12066e-08	0.42128	0.072021	5.99022e-05
cg07252394	rs11813362:114143839:G:T	-189	76	99	0.480583	6.12066e-08	0.42128	0.072021	5.99022e-05
cg07252394	rs76989317:114144062:GTT:G	34	76	99	0.480583	5.98166e-08	0.422759	0.0722105	5.90187e-05
cg07252394	rs58854276:114145044:A:G	1016	55	70	0.339806	0.000102567	0.305809	0.0756061	0.0136309
cg07252394	rs12218402:114146217:G:T	2189	76	99	0.480583	6.12066e-08	0.42128	0.072021	5.99022e-05
cg07252394	rs4918744:114146502:T:G	2474	54	59	0.286408	3.88362e-05	-0.393163	0.0913429	0.00670073
cg07252394	rs4918745:114146503:T:C	2475	54	59	0.286408	3.88362e-05	-0.393163	0.0913429	0.00670073
cg07252394	rs11195940:114147034:T:C	3006	76	99	0.480583	6.12066e-08	0.42128	0.072021	5.99022e-05
cg07252394	rs12255316:114148689:C:T	4661	76	99	0.480583	6.12066e-08	0.42128	0.072021	5.99022e-05
cg07252394	rs10885342:114149305:T:C	5277	76	99	0.480583	6.12066e-08	0.42128	0.072021	5.99022e-05
cg07252394	rs10749118:114149479:C:A	5451	75	96	0.466019	9.55313e-08	0.421506	0.0733074	8.24675e-05
cg07252394	rs147449364:114149860:AAG:A	5832	76	99	0.480583	6.12066e-08	0.42128	0.072021	5.99022e-05
cg07252394	rs7077060:114151662:T:C	7634	72	94	0.456311	9.1989e-07	0.377762	0.0722296	0.000429928
cg07252394	rs7077197:114151757:T:C	7729	72	94	0.456311	9.1989e-07	0.377762	0.0722296	0.000429928
cg07252394	rs11591311:114152227:C:T	8199	72	94	0.456311	8.13534e-07	0.379255	0.0721175	0.000393412
cg07252394	rs11312208:114153809:GC:G	9781	74	97	0.470874	1.52136e-05	0.338289	0.074415	0.00339014
cg14883055	rs34341101:114185856:T:TG	-7833	12	12	0.0582524	0.000495869	0.39476	0.109668	0.0411728
cg14883055	rs12355831:114202526:A:G	8837	12	12	0.0582524	0.00049998	0.396004	0.110088	0.0414046
cg15952994	rs56111886:114202652:G:GCATCTGTTCCT	-4063	59	72	0.349515	0.000273583	-0.356092	0.0944151	0.0273486
cg00066151	rs7078407	1861	45	57	0.276699	2.81012e-07	-0.373252	0.0678004	0.000181162
cg00066151	rs36064961:114574627:A:C	3447	45	57	0.276699	3.32261e-07	-0.37258	0.0681543	0.00020407
cg00066151	rs10715903:114578567:CA:C	7387	76	99	0.480583	0.000445244	0.263679	0.0726165	0.0382625
cg00066151	rs2479124	7814	78	101	0.490291	0.000374547	0.271362	0.0737122	0.0340064
cg16261498	rs61875062:114663010:G:A	-9461	50	64	0.31068	2.49143e-09	-0.311421	0.0475758	6.66286e-06
cg16261498	rs11196147:114665766:G:A	-6705	48	61	0.296117	1.14195e-06	-0.25864	0.0499396	0.000501322
cg16261498	rs1813335:114667350:T:C	-5121	55	71	0.34466	6.13847e-08	-0.274706	0.0469681	6.00013e-05
cg16261498	rs72826024:114667547:T:C	-4924	51	66	0.320388	8.86186e-10	-0.30654	0.0453155	3.41802e-06
cg16261498	rs11592269:114667684:G:A	-4787	51	66	0.320388	8.84637e-10	-0.306547	0.0453141	3.41265e-06
cg16261498	rs11592285:114667816:G:A	-4655	55	71	0.34466	6.05302e-08	-0.27482	0.0469626	5.94885e-05
cg16261498	rs58046881:114669974:A:T	-2497	51	66	0.320388	8.34092e-10	-0.306785	0.0452664	3.32384e-06
cg16261498	rs58708176:114670411:A:G	-2060	51	66	0.320388	8.33224e-10	-0.306703	0.0452528	3.32384e-06
cg16261498	rs7076475	-1632	56	71	0.34466	2.08738e-08	-0.287871	0.0472927	2.83581e-05
cg16261498	rs17130145:114670902:C:A	-1569	53	68	0.330097	1.25279e-08	-0.29225	0.0471491	2.02796e-05
cg16261498	rs61875068:114671327:A:T	-1144	50	64	0.31068	5.25653e-08	-0.285352	0.0485021	5.37856e-05
cg16261498	rs17130147:114671531:T:G	-940	54	69	0.334951	1.66593e-09	-0.306648	0.0462427	5.06575e-06
cg16261498	rs141866258:114671756:CCTTT:C	-715	50	64	0.31068	4.62083e-08	-0.287338	0.0486033	4.91899e-05
cg16261498	rs59545071:114672330:T:C	-141	54	69	0.334951	2.71357e-09	-0.306192	0.0469073	7.08219e-06
cg16261498	rs7075934	3942	49	58	0.281553	2.49877e-05	-0.245129	0.055472	0.00487268
cg16261498	rs7095402:114676551:A:T	4080	45	53	0.257282	2.31127e-05	-0.258405	0.0582114	0.00459924
cg16261498	rs72826033:114676916:T:A	4445	45	52	0.252427	0.000147075	-0.237037	0.0600732	0.0176547
cg16261498	rs12243341:114680154:A:G	7683	48	57	0.276699	9.12851e-06	-0.257392	0.0550619	0.0023246
cg16261498	rs17130152:114680366:G:A	7895	45	52	0.252427	0.000145058	-0.237229	0.0600638	0.0174769
cg27254667	rs550770:115071357:T:C	7704	44	48	0.23301	0.000398146	-0.248358	0.0677894	0.0354727
cg27254667	rs488272:115073606:C:A	9953	43	47	0.228155	0.000281224	-0.256768	0.068222	0.027876
cg15640580	rs73364248:115070517:G:A	-5857	24	25	0.121359	0.0005809	0.20527	0.0577753	0.0459466
cg15640580	rs4918811	-1231	24	25	0.121359	0.000589486	0.2047	0.0576855	0.0463967
cg15640580	rs112782094:115075359:G:A	-1015	24	25	0.121359	0.000626663	0.204283	0.0578643	0.048405
cg12796409	rs10885431:115097550:C:A	-8412	74	95	0.461165	0.000593856	0.229253	0.0646446	0.0466402
cg12796409	rs10885432:115100306:A:G	-5656	67	84	0.407767	0.00013206	0.250346	0.0629717	0.016333
cg12796409	rs10509973:115100421:T:C	-5541	67	84	0.407767	0.00013414	0.24997	0.0629453	0.0165107
cg12796409	rs10509974	-5482	67	84	0.407767	0.00013414	0.24997	0.0629453	0.0165107
cg12796409	rs7086109:115100765:A:G	-5197	55	65	0.315534	5.82639e-05	0.281819	0.0671465	0.00902283
cg12796409	rs4339971:115104081:C:A	-1881	63	79	0.383495	9.32841e-05	0.253949	0.0623867	0.0127335
cg12796409	rs7097540:115104532:T:C	-1430	60	75	0.364078	0.000139868	0.247227	0.0624358	0.0170219
cg12796409	rs7080287:115104798:G:T	-1164	62	79	0.383495	0.000137547	0.24408	0.0615695	0.0168168
cg12796409	rs7079935:115104824:A:G	-1138	62	78	0.378641	7.94374e-05	0.254237	0.0617977	0.0113322
cg12796409	rs7080221:115105009:A:G	-953	62	78	0.378641	7.94374e-05	0.254237	0.0617977	0.0113322
cg12796409	rs2221422	-742	63	79	0.383495	0.000101766	0.251763	0.0622114	0.0135612
cg12796409	rs111430350:115105338:A:AC	-624	63	79	0.383495	0.000101766	0.251763	0.0622114	0.0135612
cg12796409	rs4336963:115107210:T:C	1248	66	82	0.398058	0.000281845	0.241826	0.0642628	0.0279211
cg12796409	rs7090377:115107258:C:T	1296	66	82	0.398058	0.000282426	0.241784	0.0642615	0.0279574
cg12796409	rs7093880:115107503:A:G	1541	66	82	0.398058	0.000280722	0.241434	0.0641391	0.0278439
cg12250953	rs56068828:115226862:A:G	-8645	47	57	0.276699	0.000550426	-0.287026	0.0804257	0.044272
cg12250953	rs4503459:115227419:G:A	-8088	47	57	0.276699	0.000554272	-0.28697	0.0804564	0.044485
cg12250953	rs11196344:115234145:G:A	-1362	48	58	0.281553	0.000534951	-0.288024	0.0805154	0.043411
cg12250953	rs10885464:115234180:A:G	-1327	49	60	0.291262	5.97612e-05	-0.324451	0.0774288	0.00919188
cg12250953	rs17769979	149	49	60	0.291262	5.97612e-05	-0.324451	0.0774288	0.00919188
cg12250953	rs28450367:115237194:G:A	1687	48	58	0.281553	0.00043723	-0.292283	0.0803768	0.0378011
cg12250953	rs2277262:115241311:C:G	5804	47	57	0.276699	0.000554272	-0.28697	0.0804564	0.044485
cg12250953	rs3834422:115242586:CA:C	7079	51	63	0.305825	0.000490896	-0.280401	0.0778343	0.0408966
cg12250953	rs11196346:115243748:C:T	8241	48	58	0.281553	0.000439349	-0.292204	0.0803862	0.0379191
cg12250953	rs12253959:115244596:G:A	9089	47	57	0.276699	0.000554272	-0.28697	0.0804564	0.044485
cg12250953	rs11196347:115245330:C:T	9823	71	93	0.451456	2.56531e-06	-0.353192	0.0708376	0.000905245
cg25144913	rs10509981:115316725:C:A	6789	48	58	0.281553	0.00049527	0.144493	0.0401377	0.0411401
cg09746470	rs10509981:115316725:C:A	-649	48	58	0.281553	0.000181522	-0.217303	0.0559009	0.0204988
cg09746470	rs3781386:115318021:C:G	647	61	82	0.398058	0.000126283	-0.195708	0.0490763	0.0158201
cg09746470	rs3862015	5472	62	88	0.427184	0.000140564	0.184321	0.0465654	0.0170842
cg09746470	rs3862016:115322922:C:T	5548	62	87	0.42233	0.000117545	0.188457	0.0470258	0.0150372
cg09746470	rs7088038:115324499:G:A	7125	64	91	0.441748	0.000486591	0.170552	0.0473083	0.0406462
cg08165016	rs11196371:115309928:C:A	-8214	55	71	0.34466	3.25633e-05	0.179718	0.0413117	0.00588951
cg08165016	rs2000278:115310098:C:A	-8044	55	71	0.34466	3.00682e-05	0.180457	0.0412847	0.00556595
cg08165016	rs2240879:115312811:T:C	-5331	54	69	0.334951	4.67854e-05	0.178293	0.0418994	0.00768632
cg08165016	rs3837349:115313875:CAT:C	-4267	59	77	0.373786	0.000211054	0.159342	0.0414411	0.0227962
cg08165016	rs3781390:115314118:G:A	-4024	59	77	0.373786	0.00021305	0.159293	0.0414569	0.0229515
cg08165016	rs10509980:115314498:A:C	-3644	59	77	0.373786	0.000214692	0.159246	0.041468	0.0230727
cg08165016	rs3781388:115317032:G:A	-1110	59	76	0.368932	0.000335046	0.155401	0.0418473	0.031432
cg17798590	rs4918852	623	51	63	0.305825	2.36507e-05	0.119085	0.0268624	0.00467979
cg24846397	rs3121493:115429032:G:A	-9124	61	74	0.359223	2.88606e-05	0.216804	0.0494796	0.00541151
cg24846397	rs3121494:115429124:A:C	-9032	66	79	0.383495	4.36923e-06	0.243123	0.0500596	0.00134257
cg24846397	rs149970219:115434855:T:C	-3301	61	73	0.354369	3.32997e-05	-0.216528	0.0498398	0.00598855
cg24846397	rs7922608:115439919:G:T	1763	62	74	0.359223	3.91666e-05	-0.216588	0.0503456	0.00674183
cg24846397	rs7896105:115441360:A:G	3204	65	77	0.373786	0.000155131	-0.204035	0.0519037	0.0183271
cg24846397	rs7902304:115444121:T:C	5965	68	81	0.393204	0.000429499	-0.191067	0.0524676	0.0373302
cg05272550	rs3121493:115429032:G:A	-9156	61	74	0.359223	1.58845e-05	0.261461	0.0576539	0.00350234
cg05272550	rs3121494:115429124:A:C	-9064	66	79	0.383495	3.94766e-06	0.286072	0.0586038	0.00124562
cg05272550	rs149970219:115434855:T:C	-3333	61	73	0.354369	1.7374e-05	-0.261908	0.0580444	0.00373712
cg05272550	rs7922608:115439919:G:T	1731	62	74	0.359223	1.63843e-05	-0.264888	0.0585111	0.00358214
cg05272550	rs7896105:115441360:A:G	3172	65	77	0.373786	4.3463e-05	-0.2569	0.0600982	0.00728097
cg05272550	rs7907519:115441683:A:C	3495	67	80	0.38835	0.000199186	-0.234127	0.0606344	0.021864
cg05272550	rs10885496:115442919:A:G	4731	67	80	0.38835	0.000204314	-0.233834	0.0606707	0.0222584
cg05272550	rs6585239:115443395:T:C	5207	68	81	0.393204	0.000476414	-0.222307	0.0615583	0.0400685
cg05272550	rs7902304:115444121:T:C	5933	68	81	0.393204	0.000328718	-0.228086	0.0613295	0.0310281
cg16526673	rs3127078:115502717:G:A	-8002	23	26	0.126214	0.000136202	0.338885	0.0854256	0.016701
cg16526673	rs3127079:115503970:C:A	-6749	23	26	0.126214	0.000134242	0.339011	0.0853715	0.0165202
cg16526673	rs12358981:115504052:T:C	-6667	23	23	0.11165	0.000325748	0.387894	0.104227	0.0308503
cg16526673	rs3124735	-5084	53	62	0.300971	1.51817e-08	0.371632	0.0603632	2.29463e-05
cg16526673	rs3127080:115507322:G:A	-3397	23	26	0.126214	0.000132996	0.339364	0.0854049	0.016412
cg16526673	rs3127081:115507484:G:A	-3235	53	62	0.300971	1.52141e-08	0.371956	0.0604206	2.29655e-05
cg16526673	rs3127082:115510667:C:G	-52	45	52	0.252427	4.9328e-08	0.375541	0.063679	5.15092e-05
cg16526673	rs11196472:115512330:A:G	1611	15	15	0.0728155	0.000331047	0.450457	0.121189	0.0311839
cg16526673	rs80026903:115512979:G:A	2260	15	15	0.0728155	0.00030867	0.452236	0.121013	0.0297127
cg16526673	rs867300:115513098:A:C	2379	15	15	0.0728155	0.00030867	0.452236	0.121013	0.0297127
cg16526673	rs867301:115513133:T:C	2414	15	15	0.0728155	0.00030867	0.452236	0.121013	0.0297127
cg16526673	rs34446084:115513545:AAC:A	2826	15	15	0.0728155	0.000308249	0.452328	0.121025	0.0296877
cg16526673	rs3058374:115513646:T:TACA	2927	15	15	0.0728155	0.00030867	0.452236	0.121013	0.0297127
cg16526673	rs2009429:115513820:A:G	3101	15	15	0.0728155	0.000308249	0.452328	0.121025	0.0296877
cg16526673	rs2009428:115513849:G:A	3130	15	15	0.0728155	0.000308249	0.452328	0.121025	0.0296877
cg16526673	rs11196474:115514405:C:A	3686	15	15	0.0728155	0.00030867	0.452236	0.121013	0.0297127
cg16526673	rs11196475:115514553:T:C	3834	15	15	0.0728155	0.000308249	0.452328	0.121025	0.0296877
cg16526673	rs11196476:115514581:C:A	3862	23	26	0.126214	0.000181219	0.343837	0.088441	0.0204741
cg02699612	rs12357379:115503839:C:T	-9442	26	26	0.126214	0.000257372	0.262554	0.069295	0.0262377
cg02699612	rs12358981:115504052:T:C	-9229	23	23	0.11165	0.000256514	0.274549	0.0724424	0.0261739
cg02699612	rs11196459:115504368:A:G	-8913	24	24	0.116505	0.000296882	0.267369	0.0713319	0.0289326
cg02699612	rs11196461:115504421:C:A	-8860	19	19	0.092233	0.000289786	0.287878	0.0766623	0.0284483
cg02699612	rs11196462:115504473:T:C	-8808	27	27	0.131068	0.00029378	0.253653	0.0676184	0.0287252
cg02699612	rs7899677:115505229:G:A	-8052	21	21	0.101942	0.000114957	0.293672	0.0731689	0.0147938
cg02699612	rs11196463:115505653:G:A	-7628	19	19	0.092233	0.000289786	0.287878	0.0766623	0.0284483
cg02699612	rs4635039:115506116:C:T	-7165	21	21	0.101942	0.000114957	0.293672	0.0731689	0.0147938
cg02699612	rs11196464:115506619:C:T	-6662	21	21	0.101942	0.000114957	0.293672	0.0731689	0.0147938
cg02699612	rs74363802:115507737:TATC:T	-5544	27	27	0.131068	0.00029378	0.253653	0.0676184	0.0287252
cg02699612	rs11196465:115508126:T:A	-5155	27	27	0.131068	0.00029378	0.253653	0.0676184	0.0287252
cg02699612	rs4394799	-4899	27	27	0.131068	0.00029378	0.253653	0.0676184	0.0287252
cg02699612	rs6585242:115508771:T:G	-4510	27	27	0.131068	0.0002944	0.25371	0.0676447	0.0287675
cg02699612	rs7077150:115508834:T:C	-4447	27	27	0.131068	0.000294152	0.253818	0.0676691	0.0287478
cg02699612	rs11196466:115509081:A:G	-4200	27	27	0.131068	0.000294152	0.253818	0.0676691	0.0287478
cg02699612	rs11196468:115510108:G:T	-3173	27	27	0.131068	0.000295023	0.254135	0.0677689	0.0288084
cg02699612	rs11196469:115510177:A:C	-3104	27	27	0.131068	0.000295023	0.254135	0.0677689	0.0288084
cg02699612	rs11196470:115510348:A:T	-2933	27	27	0.131068	0.000295523	0.254287	0.0678181	0.0288408
cg02699612	rs72309088:115510524:GCTAA:G	-2757	21	21	0.101942	0.000113586	0.294559	0.07333	0.0146699
cg02699612	rs11196471:115510892:A:G	-2389	24	24	0.116505	0.000285497	0.265762	0.0706926	0.0281711
cg02699612	rs11196472:115512330:A:G	-951	15	15	0.0728155	0.00026778	0.318278	0.0842527	0.0269421
cg02699612	rs11196473:115512493:C:T	-788	18	18	0.0873786	0.000363515	0.291618	0.0790289	0.0332734
cg02699612	rs80026903:115512979:G:A	-302	15	15	0.0728155	0.000276312	0.317365	0.0842101	0.0275309
cg02699612	rs867300:115513098:A:C	-183	15	15	0.0728155	0.000276312	0.317365	0.0842101	0.0275309
cg02699612	rs867301:115513133:T:C	-148	15	15	0.0728155	0.000276312	0.317365	0.0842101	0.0275309
cg02699612	rs34446084:115513545:AAC:A	264	15	15	0.0728155	0.000274126	0.317568	0.0842133	0.0273864
cg02699612	rs3058374:115513646:T:TACA	365	15	15	0.0728155	0.000276312	0.317365	0.0842101	0.0275309
cg02699612	rs2009429:115513820:A:G	539	15	15	0.0728155	0.000274126	0.317568	0.0842133	0.0273864
cg02699612	rs2009428:115513849:G:A	568	15	15	0.0728155	0.000274126	0.317568	0.0842133	0.0273864
cg02699612	rs11196474:115514405:C:A	1124	15	15	0.0728155	0.000276312	0.317365	0.0842101	0.0275309
cg02699612	rs11196475:115514553:T:C	1272	15	15	0.0728155	0.000274126	0.317568	0.0842133	0.0273864
cg13894665	rs180928:115733127:G:A	-9968	68	89	0.432039	0.000486657	0.0926934	0.0257119	0.040649
cg13894665	rs180927:115733794:T:G	-9301	68	89	0.432039	0.000486657	0.0926934	0.0257119	0.040649
cg13894665	rs180926:115734588:C:T	-8507	68	89	0.432039	0.000486657	0.0926934	0.0257119	0.040649
cg13894665	rs11388544:115735438:A:AG	-7657	64	84	0.407767	0.000162094	0.098546	0.0251468	0.0188947
cg13894665	rs138551146:115735613:GGAGAGAGAAAGA:G	-7482	68	89	0.432039	0.000486657	0.0926934	0.0257119	0.040649
cg13894665	rs71007448:115735653:A:ATGTGTGTGTG	-7442	68	91	0.441748	0.000360644	0.0926571	0.0250946	0.0330797
cg13894665	rs180923:115735813:A:T	-7282	68	89	0.432039	0.000486657	0.0926934	0.0257119	0.040649
cg13894665	rs180922:115736097:C:T	-6998	68	89	0.432039	0.000406866	0.0938656	0.0256648	0.0359958
cg13894665	rs180921:115736190:C:G	-6905	68	89	0.432039	0.000486657	0.0926934	0.0257119	0.040649
cg13894665	rs180920:115736435:T:C	-6660	64	84	0.407767	0.000162094	0.098546	0.0251468	0.0188947
cg13894665	rs138839712:115736458:TTCCC:T	-6637	67	88	0.427184	0.000171167	0.0993577	0.0254524	0.0196407
cg13894665	rs180919:115737076:A:G	-6019	68	89	0.432039	0.000489029	0.0926756	0.0257171	0.040791
cg13894665	rs180918:115737344:G:C	-5751	65	85	0.412621	0.000137449	0.100111	0.0252518	0.0168089
cg13894665	rs180916:115737559:C:A	-5536	68	89	0.432039	0.000486288	0.0926874	0.0257086	0.0406303
cg13894665	rs180913:115738559:T:A	-4536	64	84	0.407767	0.000163108	0.0984992	0.025146	0.0189766
cg13894665	rs180912:115741828:T:G	-1267	68	89	0.432039	0.000453549	0.093297	0.025732	0.0387414
cg13894665	rs180910:115742446:T:C	-649	68	89	0.432039	0.000444786	0.0935926	0.0257731	0.0382337
cg13894665	rs180909:115742477:A:G	-618	68	89	0.432039	0.000443621	0.093629	0.0257776	0.0381676
cg11034326	rs10787511:115747997:A:G	109	78	98	0.475728	1.12231e-09	-0.572907	0.08532	3.98443e-06
cg11034326	rs12767891	445	78	101	0.490291	2.14093e-11	-0.598318	0.0794054	3.178e-07
cg11284299	rs11196595:115784376:T:C	-529	25	29	0.140777	0.00057715	0.171432	0.0482253	0.0457454
cg11284299	rs7090339:115784493:A:G	-412	27	31	0.150485	0.000430172	0.173104	0.0475409	0.0373707
cg11284299	rs7090717:115784692:C:T	-213	27	31	0.150485	0.000413142	0.17358	0.0475182	0.0363728
cg11284299	rs10885529:115785750:C:T	845	25	29	0.140777	0.00050503	0.172823	0.0480838	0.0416991
cg11284299	rs7096104:115786214:A:T	1309	27	31	0.150485	0.000371283	0.174652	0.0474095	0.0337913
cg11284299	rs12412523:115786838:T:C	1933	47	57	0.276699	1.776e-05	0.167762	0.0372259	0.00379532
cg11284299	rs9663133:115788312:C:A	3407	25	29	0.140777	0.000375007	0.176579	0.0479702	0.0340328
cg11284299	rs12414581:115789150:A:G	4245	25	29	0.140777	0.000364305	0.176856	0.0479362	0.0333276
cg11284299	rs12355435:115789537:C:T	4632	25	29	0.140777	0.000361008	0.176965	0.0479316	0.0331027
cg11284299	rs2900997:115790744:A:G	5839	25	29	0.140777	0.000353429	0.177071	0.0478809	0.032621
cg11284299	rs2900998:115790823:G:C	5918	25	29	0.140777	0.000426435	0.174542	0.0479023	0.0371484
cg11284299	rs2484294:115792062:G:A	7157	51	61	0.296117	0.000424383	0.140545	0.0385571	0.0370284
cg11284299	rs740746	7882	51	61	0.296117	0.000515669	0.137557	0.0383373	0.0423063
cg11284299	rs11196598:115793754:A:T	8849	25	29	0.140777	0.000343331	0.177402	0.0478622	0.031976
cg11284299	rs11196599:115793783:C:G	8878	25	29	0.140777	0.000343331	0.177402	0.0478622	0.031976
cg11284299	rs7074495:115793787:A:C	8882	45	54	0.262136	2.54526e-06	0.185673	0.0372252	0.000900778
cg11284299	rs35818742:115793989:T:C	9084	25	29	0.140777	0.000339784	0.17751	0.0478529	0.0317357
cg11284299	rs11196600:115794127:C:T	9222	25	29	0.140777	0.000339784	0.17751	0.0478529	0.0317357
cg11284299	rs7093444:115794324:T:C	9419	29	35	0.169903	0.000129362	0.173692	0.0436278	0.0161005
cg11284299	rs36085159:115794485:TG:T	9580	29	35	0.169903	0.000129362	0.173692	0.0436278	0.0161005
cg11284299	rs4917671:115794895:G:A	9990	25	29	0.140777	0.000339627	0.177472	0.047841	0.0317268
cg25236139	rs7076938:115789375:C:T	-9497	50	60	0.291262	0.000588517	-0.169824	0.0478508	0.0463436
cg14826456	rs2773469:115798895:A:G	-5201	51	60	0.291262	0.000234806	0.155535	0.0407698	0.0245981
cg16882433	rs71486238:115851703:T:A	-5382	31	38	0.184466	0.000138448	0.121419	0.0306421	0.0168986
cg16882433	rs7894562:115852542:A:G	-4543	35	42	0.203883	6.16382e-06	0.140334	0.029407	0.00174019
cg16882433	rs11592578:115853424:A:T	-3661	35	42	0.203883	7.53787e-06	0.138795	0.0293915	0.00202178
cg16882433	rs17091304:115854106:A:G	-2979	35	43	0.208738	8.50178e-06	0.134871	0.0287428	0.00220449
cg16882433	rs12784071:115854445:C:T	-2640	30	35	0.169903	0.000277285	0.128659	0.0341476	0.0276036
cg16882433	rs17091310:115854569:C:T	-2516	35	42	0.203883	6.0315e-06	0.140335	0.0293743	0.00171
cg16882433	rs12765375:115854861:C:A	-2224	34	41	0.199029	1.03504e-05	0.137204	0.0295497	0.0025503
cg16882433	rs12766317:115855089:G:C	-1996	36	43	0.208738	3.69813e-06	0.143214	0.0292432	0.00118777
cg16882433	rs11598205:115855381:C:G	-1704	35	42	0.203883	6.0315e-06	0.140335	0.0293743	0.00171
cg16882433	rs12772946:115855543:T:C	-1542	35	42	0.203883	7.53787e-06	0.138795	0.0293915	0.00202178
cg16882433	rs12772007:115855623:G:T	-1462	35	42	0.203883	7.53787e-06	0.138795	0.0293915	0.00202178
cg16882433	rs17091321:115855712:A:G	-1373	35	42	0.203883	6.0315e-06	0.140335	0.0293743	0.00171
cg16882433	rs35416982:115856169:C:T	-916	34	41	0.199029	1.03504e-05	0.137204	0.0295497	0.0025503
cg16882433	rs35722931:115856450:G:A	-635	35	42	0.203883	6.0315e-06	0.140335	0.0293743	0.00171
cg16882433	rs34718425:115856463:T:G	-622	35	42	0.203883	6.0315e-06	0.140335	0.0293743	0.00171
cg16882433	rs12780179:115856664:T:C	-421	34	41	0.199029	1.03504e-05	0.137204	0.0295497	0.0025503
cg16882433	rs12780590:115856818:T:C	-267	34	41	0.199029	1.03504e-05	0.137204	0.0295497	0.0025503
cg16882433	rs12778917	-252	34	41	0.199029	1.03504e-05	0.137204	0.0295497	0.0025503
cg16882433	rs12779122:115856923:A:G	-162	35	42	0.203883	1.37592e-05	0.135641	0.0296713	0.00314554
cg16882433	rs12779707:115857076:C:T	-9	36	43	0.208738	7.96232e-06	0.138957	0.029511	0.0021042
cg16882433	rs3895537:115857972:A:G	887	36	43	0.208738	7.54745e-06	0.139559	0.0295553	0.00202374
cg16882433	rs112473590:115858759:G:A	1674	36	43	0.208738	7.31258e-06	0.139914	0.0295813	0.00197513
cg16882433	rs35166207:115859857:T:C	2772	38	45	0.218447	1.70358e-05	0.133859	0.0296331	0.00368197
cg16882433	rs12777288:115860058:T:C	2973	35	42	0.203883	5.40523e-06	0.141524	0.0294566	0.00157254
cg16882433	rs11595268:115860493:T:C	3408	35	42	0.203883	5.40523e-06	0.141524	0.0294566	0.00157254
cg16882433	rs11593066:115860532:G:A	3447	36	43	0.208738	9.03556e-06	0.138449	0.0296012	0.00230709
cg16882433	rs12781886:115860644:C:T	3559	35	42	0.203883	5.40523e-06	0.141524	0.0294566	0.00157254
cg16882433	rs12782306:115860856:C:T	3771	34	41	0.199029	7.47837e-06	0.139942	0.029622	0.00200994
cg16882433	rs12783973:115860922:T:C	3837	35	42	0.203883	5.40523e-06	0.141524	0.0294566	0.00157254
cg16882433	rs12782726:115861013:C:T	3928	34	41	0.199029	7.47837e-06	0.139942	0.029622	0.00200994
cg16882433	rs12784418:115861155:T:G	4070	35	42	0.203883	5.40523e-06	0.141524	0.0294566	0.00157254
cg16882433	rs12783121:115861192:C:T	4107	35	42	0.203883	5.40523e-06	0.141524	0.0294566	0.00157254
cg16882433	rs7081228:115861463:T:G	4378	35	42	0.203883	5.40523e-06	0.141524	0.0294566	0.00157254
cg16882433	rs12779144:115862116:T:C	5031	35	42	0.203883	5.40523e-06	0.141524	0.0294566	0.00157254
cg16882433	rs12778134:115862429:A:T	5344	35	42	0.203883	4.35269e-06	0.142882	0.0294142	0.00133933
cg16882433	rs12783626:115862755:A:G	5670	35	42	0.203883	4.35269e-06	0.142882	0.0294142	0.00133933
cg16882433	rs17091346:115863219:C:G	6134	35	42	0.203883	4.35269e-06	0.142882	0.0294142	0.00133933
cg16882433	rs34779461:115863574:C:T	6489	35	42	0.203883	4.35269e-06	0.142882	0.0294142	0.00133933
cg16882433	rs12766098:115863631:C:T	6546	35	42	0.203883	4.35269e-06	0.142882	0.0294142	0.00133933
cg16882433	rs12766120:115863708:A:G	6623	35	42	0.203883	4.35269e-06	0.142882	0.0294142	0.00133933
cg16882433	rs12768072:115863898:T:C	6813	35	42	0.203883	4.35269e-06	0.142882	0.0294142	0.00133933
cg16882433	rs12766743:115863906:C:G	6821	35	42	0.203883	4.35674e-06	0.14287	0.029413	0.00134016
cg16882433	rs12767270:115864035:G:A	6950	35	42	0.203883	4.35269e-06	0.142882	0.0294142	0.00133933
cg16882433	rs66469068:115864130:G:T	7045	35	42	0.203883	4.40185e-06	0.142832	0.0294204	0.00134985
cg16882433	rs66653293:115864133:G:A	7048	35	42	0.203883	4.35269e-06	0.142882	0.0294142	0.00133933
cg16882433	rs7077873:115864462:G:A	7377	35	42	0.203883	4.35269e-06	0.142882	0.0294142	0.00133933
cg16882433	rs141272168:115865032:C:CTTTAA	7947	35	42	0.203883	4.35269e-06	0.142882	0.0294142	0.00133933
cg16882433	rs67827019:115865398:T:C	8313	35	42	0.203883	4.35269e-06	0.142882	0.0294142	0.00133933
cg16882433	rs34622728:115865465:AT:A	8380	35	42	0.203883	4.35269e-06	0.142882	0.0294142	0.00133933
cg16882433	rs67312759:115865738:T:C	8653	35	42	0.203883	4.35269e-06	0.142882	0.0294142	0.00133933
cg16882433	rs68189827:115865786:A:G	8701	35	42	0.203883	4.35269e-06	0.142882	0.0294142	0.00133933
cg16882433	rs34742988:115865830:A:C	8745	35	42	0.203883	4.35269e-06	0.142882	0.0294142	0.00133933
cg16882433	rs35489515:115865849:A:G	8764	35	42	0.203883	4.35269e-06	0.142882	0.0294142	0.00133933
cg16882433	rs35529029:115865981:C:T	8896	35	42	0.203883	4.35269e-06	0.142882	0.0294142	0.00133933
cg16882433	rs35196565:115866080:C:T	8995	35	42	0.203883	4.15855e-06	0.143331	0.029439	0.00129541
cg16882433	rs34840453:115866092:T:A	9007	35	42	0.203883	4.15855e-06	0.143331	0.029439	0.00129541
cg16882433	rs34714312:115866094:T:G	9009	35	42	0.203883	4.15855e-06	0.143331	0.029439	0.00129541
cg06423252	rs71486238:115851703:T:A	-9525	31	38	0.184466	2.12562e-05	-0.217404	0.0487388	0.00432437
cg06423252	rs7894562:115852542:A:G	-8686	35	42	0.203883	7.85155e-06	-0.224852	0.0477174	0.00208376
cg06423252	rs11592578:115853424:A:T	-7804	35	42	0.203883	7.81346e-06	-0.224351	0.0475988	0.00207699
cg06423252	rs17091304:115854106:A:G	-7122	35	43	0.208738	1.72263e-05	-0.211477	0.0468453	0.00371201
cg06423252	rs12784071:115854445:C:T	-6783	30	35	0.169903	6.82381e-05	-0.226693	0.0545608	0.0101368
cg06423252	rs17091310:115854569:C:T	-6659	35	42	0.203883	8.08742e-06	-0.22436	0.0476876	0.00212767
cg06423252	rs12765375:115854861:C:A	-6367	34	41	0.199029	6.82075e-06	-0.226195	0.0476493	0.00187504
cg06423252	rs12766317:115855089:G:C	-6139	36	43	0.208738	9.14703e-06	-0.223199	0.0477525	0.00232797
cg06423252	rs11598205:115855381:C:G	-5847	35	42	0.203883	8.08742e-06	-0.22436	0.0476876	0.00212767
cg06423252	rs12772946:115855543:T:C	-5685	35	42	0.203883	7.81346e-06	-0.224351	0.0475988	0.00207699
cg06423252	rs12772007:115855623:G:T	-5605	35	42	0.203883	7.81346e-06	-0.224351	0.0475988	0.00207699
cg06423252	rs17091321:115855712:A:G	-5516	35	42	0.203883	8.08742e-06	-0.22436	0.0476876	0.00212767
cg06423252	rs35416982:115856169:C:T	-5059	34	41	0.199029	6.82075e-06	-0.226195	0.0476493	0.00187504
cg06423252	rs35722931:115856450:G:A	-4778	35	42	0.203883	8.08742e-06	-0.22436	0.0476876	0.00212767
cg06423252	rs34718425:115856463:T:G	-4765	35	42	0.203883	8.08742e-06	-0.22436	0.0476876	0.00212767
cg06423252	rs12780179:115856664:T:C	-4564	34	41	0.199029	6.82075e-06	-0.226195	0.0476493	0.00187504
cg06423252	rs12780590:115856818:T:C	-4410	34	41	0.199029	6.82075e-06	-0.226195	0.0476493	0.00187504
cg06423252	rs12778917	-4395	34	41	0.199029	6.82075e-06	-0.226195	0.0476493	0.00187504
cg06423252	rs12779122:115856923:A:G	-4305	35	42	0.203883	2.76164e-06	-0.235027	0.0473068	0.000957805
cg06423252	rs12779707:115857076:C:T	-4152	36	43	0.208738	3.28311e-06	-0.23338	0.0473744	0.00108658
cg06423252	rs3895537:115857972:A:G	-3256	36	43	0.208738	3.24336e-06	-0.233963	0.0474643	0.00107638
cg06423252	rs112473590:115858759:G:A	-2469	36	43	0.208738	3.22202e-06	-0.2343	0.0475174	0.00107073
cg06423252	rs35166207:115859857:T:C	-1371	38	45	0.218447	3.15034e-06	-0.23304	0.0472095	0.00105322
cg06423252	rs12777288:115860058:T:C	-1170	35	42	0.203883	7.96982e-06	-0.225367	0.0478645	0.00210556
cg06423252	rs11595268:115860493:T:C	-735	35	42	0.203883	7.96982e-06	-0.225367	0.0478645	0.00210556
cg06423252	rs11593066:115860532:G:A	-696	36	43	0.208738	3.12184e-06	-0.234279	0.0474394	0.00104561
cg06423252	rs12781886:115860644:C:T	-584	35	42	0.203883	7.96982e-06	-0.225367	0.0478645	0.00210556
cg06423252	rs12782306:115860856:C:T	-372	34	41	0.199029	6.92452e-06	-0.227304	0.0479206	0.00189731
cg06423252	rs12783973:115860922:T:C	-306	35	42	0.203883	7.96982e-06	-0.225367	0.0478645	0.00210556
cg06423252	rs12782726:115861013:C:T	-215	34	41	0.199029	6.92452e-06	-0.227304	0.0479206	0.00189731
cg06423252	rs12784418:115861155:T:G	-73	35	42	0.203883	7.96982e-06	-0.225367	0.0478645	0.00210556
cg06423252	rs12783121:115861192:C:T	-36	35	42	0.203883	7.96982e-06	-0.225367	0.0478645	0.00210556
cg06423252	rs7081228:115861463:T:G	235	35	42	0.203883	7.96982e-06	-0.225367	0.0478645	0.00210556
cg06423252	rs12779144:115862116:T:C	888	35	42	0.203883	7.96982e-06	-0.225367	0.0478645	0.00210556
cg06423252	rs12778134:115862429:A:T	1201	35	42	0.203883	8.45832e-06	-0.224925	0.0479214	0.00219573
cg06423252	rs12783626:115862755:A:G	1527	35	42	0.203883	8.45832e-06	-0.224925	0.0479214	0.00219573
cg06423252	rs17091346:115863219:C:G	1991	35	42	0.203883	8.45832e-06	-0.224925	0.0479214	0.00219573
cg06423252	rs34779461:115863574:C:T	2346	35	42	0.203883	8.45832e-06	-0.224925	0.0479214	0.00219573
cg06423252	rs12766098:115863631:C:T	2403	35	42	0.203883	8.45832e-06	-0.224925	0.0479214	0.00219573
cg06423252	rs12766120:115863708:A:G	2480	35	42	0.203883	8.45832e-06	-0.224925	0.0479214	0.00219573
cg06423252	rs12768072:115863898:T:C	2670	35	42	0.203883	8.45832e-06	-0.224925	0.0479214	0.00219573
cg06423252	rs12766743:115863906:C:G	2678	35	42	0.203883	8.46106e-06	-0.224911	0.0479192	0.0021962
cg06423252	rs12767270:115864035:G:A	2807	35	42	0.203883	8.45832e-06	-0.224925	0.0479214	0.00219573
cg06423252	rs66469068:115864130:G:T	2902	35	42	0.203883	8.54513e-06	-0.224848	0.0479311	0.00221307
cg06423252	rs66653293:115864133:G:A	2905	35	42	0.203883	8.45832e-06	-0.224925	0.0479214	0.00219573
cg06423252	rs7077873:115864462:G:A	3234	35	42	0.203883	8.45832e-06	-0.224925	0.0479214	0.00219573
cg06423252	rs141272168:115865032:C:CTTTAA	3804	35	42	0.203883	8.45832e-06	-0.224925	0.0479214	0.00219573
cg06423252	rs67827019:115865398:T:C	4170	35	42	0.203883	8.45832e-06	-0.224925	0.0479214	0.00219573
cg06423252	rs34622728:115865465:AT:A	4237	35	42	0.203883	8.45832e-06	-0.224925	0.0479214	0.00219573
cg06423252	rs67312759:115865738:T:C	4510	35	42	0.203883	8.45832e-06	-0.224925	0.0479214	0.00219573
cg06423252	rs68189827:115865786:A:G	4558	35	42	0.203883	8.45832e-06	-0.224925	0.0479214	0.00219573
cg06423252	rs34742988:115865830:A:C	4602	35	42	0.203883	8.45832e-06	-0.224925	0.0479214	0.00219573
cg06423252	rs35489515:115865849:A:G	4621	35	42	0.203883	8.45832e-06	-0.224925	0.0479214	0.00219573
cg06423252	rs35529029:115865981:C:T	4753	35	42	0.203883	8.45832e-06	-0.224925	0.0479214	0.00219573
cg06423252	rs35196565:115866080:C:T	4852	35	42	0.203883	8.06566e-06	-0.225679	0.047961	0.0021236
cg06423252	rs34840453:115866092:T:A	4864	35	42	0.203883	8.06566e-06	-0.225679	0.047961	0.0021236
cg06423252	rs34714312:115866094:T:G	4866	35	42	0.203883	8.06566e-06	-0.225679	0.047961	0.0021236
cg06423252	rs33994793:115868460:A:ACAG	7232	36	43	0.208738	3.4347e-06	-0.233915	0.0475889	0.00112262
cg06423252	rs12777663:115869446:A:G	8218	36	43	0.208738	3.48859e-06	-0.234054	0.0476538	0.0011358
cg13665695	rs11196682	6580	42	46	0.223301	0.000424744	0.137028	0.0375947	0.0370506
cg13665695	rs11196683:116048203:A:C	6862	38	41	0.199029	0.00031231	0.146626	0.0392708	0.029959
cg13665695	rs11196684:116048302:G:A	6961	41	45	0.218447	0.00032694	0.141267	0.0379691	0.030922
cg13665695	rs11196685:116048308:G:A	6967	41	45	0.218447	0.000325137	0.141296	0.0379606	0.0308085
cg13665695	rs35482716:116050481:CA:C	9140	41	45	0.218447	0.000322222	0.14144	0.0379729	0.0306165
cg24933134	rs4918897:116079751:T:G	-9879	50	62	0.300971	5.60674e-06	-0.111332	0.023216	0.00161714
cg24933134	rs2003527:116081097:T:C	-8533	54	71	0.34466	8.01718e-07	-0.111373	0.0211643	0.000389488
cg24933134	rs4244311:116087636:G:A	-1994	50	62	0.300971	4.56067e-06	-0.112673	0.0232498	0.0013846
cg24933134	rs7924166:116088247:C:G	-1383	50	62	0.300971	5.15867e-06	-0.111598	0.0231724	0.00151784
cg24933134	rs10885548:116088732:T:A	-898	54	71	0.34466	9.43359e-07	-0.109776	0.0210134	0.00043652
cg24933134	rs10885549:116089908:A:T	278	54	71	0.34466	9.86343e-07	-0.10949	0.0210008	0.000450376
cg24933134	rs10885550:116090055:G:A	425	54	71	0.34466	8.74036e-07	-0.110346	0.0210503	0.000415186
cg24933134	rs10885551:116090061:T:C	431	54	71	0.34466	9.91361e-07	-0.109482	0.021004	0.000452041
cg24933134	rs10885552:116090170:T:C	540	54	71	0.34466	9.86343e-07	-0.10949	0.0210008	0.000450376
cg24933134	rs4918900	873	54	71	0.34466	9.79986e-07	-0.109509	0.0209983	0.000448657
cg24933134	rs1413620:116092755:A:G	3125	50	62	0.300971	5.5806e-06	-0.111194	0.0231818	0.00161138
cg24933134	rs7895405:116093814:C:G	4184	50	62	0.300971	5.12318e-06	-0.11204	0.0232562	0.00150979
cg12177113	rs537432	-965	75	97	0.470874	0.000245407	-0.117904	0.0310075	0.0253912
cg12177113	rs59854616:116154209:GT:G	890	75	98	0.475728	0.000169149	0.121237	0.0310309	0.0194686
cg11453400	rs605654:116155850:T:C	-9341	19	21	0.101942	0.000490509	-0.150559	0.0417897	0.040875
cg11453400	rs475150:116156803:A:C	-8388	16	16	0.0776699	0.000397668	-0.179589	0.0490142	0.0354417
cg11453400	rs622320:116157256:G:C	-7935	16	16	0.0776699	0.000389565	-0.179835	0.0490015	0.0349172
cg11453400	rs622646:116157264:T:C	-7927	16	16	0.0776699	0.000389565	-0.179835	0.0490015	0.0349172
cg11453400	rs7069926:116161080:C:T	-4111	17	19	0.092233	0.000144568	-0.165016	0.0417704	0.0174355
cg11453400	rs12355335:116166321:G:A	1130	17	17	0.0825243	0.000142522	-0.193656	0.0489712	0.0172548
cg11453400	rs12356147:116167867:G:A	2676	14	14	0.0679612	0.000342921	-0.196269	0.0529475	0.0319481
cg11453400	rs7916796:116168945:G:A	3754	16	16	0.0776699	7.38974e-05	-0.204537	0.0494829	0.0107376
cg11453400	rs941855:116169841:T:C	4650	20	23	0.11165	9.376e-05	-0.155432	0.0381975	0.0127839
cg11453400	rs12357098:116170396:G:C	5205	17	18	0.0873786	3.9507e-05	-0.184129	0.042823	0.00678213
cg11453400	rs6585277:116170950:T:C	5759	17	18	0.0873786	4.47659e-05	-0.184923	0.0433389	0.007447
cg11453400	rs7910088	7295	17	18	0.0873786	5.51811e-05	-0.184989	0.0439244	0.00867321
cg14547188	rs7067793:116230719:A:C	-1112	76	102	0.495146	0.000384533	0.16801	0.0457324	0.0346275
cg14547188	rs1535386	1403	70	90	0.436893	0.000440205	-0.168005	0.046226	0.0379705
cg14547188	rs3215698:116233354:AT:A	1523	73	93	0.451456	0.000467677	-0.173108	0.0478629	0.0395594
cg17056676	rs10159807:116293790:C:G	-7565	63	86	0.417476	0.00049594	-0.0815692	0.022661	0.0411772
cg17056676	rs10159811:116293820:G:A	-7535	63	86	0.417476	0.00049594	-0.0815692	0.022661	0.0411772
cg17056676	rs7893570:116294295:G:A	-7060	63	86	0.417476	0.00049594	-0.0815692	0.022661	0.0411772
cg17056676	rs11196779:116294474:G:A	-6881	48	55	0.26699	0.000271191	0.104795	0.0277673	0.0271812
cg17056676	rs12569428:116294749:A:G	-6606	48	55	0.26699	0.000271191	0.104795	0.0277673	0.0271812
cg17056676	rs10159857:116294870:C:A	-6485	63	86	0.417476	0.00049816	-0.0815271	0.0226576	0.0413068
cg17056676	rs10885572:116295002:T:C	-6353	48	55	0.26699	0.000276265	0.104695	0.0277794	0.027528
cg17056676	rs10885573:116295023:A:G	-6332	48	55	0.26699	0.000271191	0.104795	0.0277673	0.0271812
cg17056676	rs4568918:116295323:C:A	-6032	48	55	0.26699	0.000274696	0.104682	0.0277642	0.0274218
cg17056676	rs4514325:116296336:G:A	-5019	48	55	0.26699	0.000274696	0.104682	0.0277642	0.0274218
cg17056676	rs10885574:116296487:C:T	-4868	63	86	0.417476	0.00049816	-0.0815271	0.0226576	0.0413068
cg17056676	rs11196780	-4701	48	55	0.26699	0.000274696	0.104682	0.0277642	0.0274218
cg17056676	rs11196781:116297050:G:T	-4305	48	55	0.26699	0.000274696	0.104682	0.0277642	0.0274218
cg17056676	rs10885575:116297297:A:G	-4058	48	55	0.26699	0.000274696	0.104682	0.0277642	0.0274218
cg17056676	rs10885576:116298843:G:A	-2512	63	86	0.417476	0.000502473	-0.0814784	0.02266	0.041548
cg17056676	rs35078486:116298916:G:A	-2439	50	57	0.276699	0.000197919	0.107188	0.0277467	0.0217722
cg17056676	rs56218475:116299117:A:AAAC	-2238	47	54	0.262136	0.000407244	0.101859	0.0278522	0.0360182
cg17056676	rs56086836:116299146:A:G	-2209	50	57	0.276699	0.000197919	0.107188	0.0277467	0.0217722
cg17056676	rs56001223:116299166:T:G	-2189	48	55	0.26699	0.000274696	0.104682	0.0277642	0.0274218
cg17056676	rs10749167:116300041:G:C	-1314	63	86	0.417476	0.000502473	-0.0814784	0.02266	0.041548
cg17056676	rs883511:116300218:G:A	-1137	48	55	0.26699	0.000274696	-0.104682	0.0277642	0.0274218
cg17056676	rs867736:116300894:A:G	-461	48	55	0.26699	0.000274696	-0.104682	0.0277642	0.0274218
cg17056676	rs883768:116300958:T:C	-397	48	55	0.26699	0.000274696	-0.104682	0.0277642	0.0274218
cg17056676	rs2483571:116301294:C:T	-61	48	55	0.26699	0.000274696	-0.104682	0.0277642	0.0274218
cg17056676	rs10787535:116301436:G:A	81	63	86	0.417476	0.000445576	-0.0822018	0.0226395	0.0382787
cg17056676	rs10749168:116301983:T:C	628	63	86	0.417476	0.000501024	-0.0814798	0.0226551	0.0414638
cg17056676	rs11408928:116302416:C:CT	1061	48	55	0.26699	0.000274696	-0.104682	0.0277642	0.0274218
cg17056676	rs11196782:116302495:A:G	1140	63	86	0.417476	0.000496723	-0.0815285	0.0226526	0.0412223
cg17056676	rs2497717:116303353:G:A	1998	48	55	0.26699	0.000274696	-0.104682	0.0277642	0.0274218
cg17056676	rs2483585:116303358:C:T	2003	48	55	0.26699	0.000274696	-0.104682	0.0277642	0.0274218
cg17056676	rs10885578:116303554:G:C	2199	63	86	0.417476	0.000501024	-0.0814798	0.0226551	0.0414638
cg17056676	rs2483587:116303865:C:T	2510	48	55	0.26699	0.000274696	-0.104682	0.0277642	0.0274218
cg17056676	rs2483588:116304088:T:C	2733	48	55	0.26699	0.000274696	-0.104682	0.0277642	0.0274218
cg17056676	rs11196783:116304133:T:A	2778	63	86	0.417476	0.000501024	-0.0814798	0.0226551	0.0414638
cg17056676	rs10885579:116304958:C:T	3603	63	86	0.417476	0.000501024	-0.0814798	0.0226551	0.0414638
cg17056676	rs2483595:116304971:T:C	3616	48	55	0.26699	0.000274696	-0.104682	0.0277642	0.0274218
cg17056676	rs2483596:116305041:A:G	3686	50	57	0.276699	0.000197919	-0.107188	0.0277467	0.0217722
cg17056676	rs11196784:116305140:A:G	3785	63	86	0.417476	0.000496723	-0.0815285	0.0226526	0.0412223
cg17056676	rs2483599:116305377:C:T	4022	48	55	0.26699	0.000274696	-0.104682	0.0277642	0.0274218
cg17056676	rs9421179:116305755:T:C	4400	48	55	0.26699	0.000274696	-0.104682	0.0277642	0.0274218
cg17056676	rs2483612:116306781:A:G	5426	48	55	0.26699	0.000274696	-0.104682	0.0277642	0.0274218
cg17056676	rs11302858:116306914:AT:A	5559	48	55	0.26699	0.000274696	-0.104682	0.0277642	0.0274218
cg17056676	rs2247528:116307504:A:G	6149	48	55	0.26699	0.000274033	-0.104723	0.02777	0.0273797
cg17056676	rs2247624:116307770:C:T	6415	48	55	0.26699	0.000273626	-0.104769	0.0277789	0.0273516
cg17056676	rs2497718:116307982:C:A	6627	48	55	0.26699	0.000274696	-0.104682	0.0277642	0.0274218
cg17056676	rs2497719:116308064:G:A	6709	48	55	0.26699	0.000274696	-0.104682	0.0277642	0.0274218
cg17056676	rs2497720:116309015:C:T	7660	48	55	0.26699	0.000274696	-0.104682	0.0277642	0.0274218
cg17056676	rs2483531:116309185:T:C	7830	48	55	0.26699	0.000274696	-0.104682	0.0277642	0.0274218
cg17056676	rs2497722:116310102:T:G	8747	48	55	0.26699	0.000272091	-0.104784	0.0277712	0.0272487
cg17056676	rs9421182:116310142:T:C	8787	55	64	0.31068	6.13189e-05	-0.111327	0.0266113	0.00935972
cg17056676	rs2497723:116310159:C:T	8804	48	55	0.26699	0.000272091	-0.104784	0.0277712	0.0272487
cg02027969	rs113759256:116325797:G:A	-9608	46	54	0.262136	3.20053e-08	-0.366669	0.0611819	3.82714e-05
cg02027969	rs10885582:116327550:T:C	-7855	61	81	0.393204	0.00017825	0.219153	0.0563032	0.0202309
cg02027969	rs7915301:116329264:C:A	-6141	52	66	0.320388	2.40066e-06	-0.284725	0.0569232	0.000862539
cg02027969	rs11196790:116330497:G:A	-4908	63	83	0.402913	0.000167691	0.222373	0.0568817	0.0193531
cg02027969	rs2483563:116330557:G:A	-4848	48	54	0.262136	6.75828e-09	-0.399549	0.0630998	1.3091e-05
cg02027969	rs10885583:116330773:C:T	-4632	61	81	0.393204	0.000185335	0.218732	0.0563527	0.020801
cg02027969	rs2483568:116333411:G:C	-1994	47	55	0.26699	4.24372e-08	-0.361798	0.0610037	4.6262e-05
cg02027969	rs2483570:116334208:A:T	-1197	48	59	0.286408	2.00869e-08	-0.345336	0.0566549	2.75988e-05
cg02027969	rs10885585:116334346:C:T	-1059	63	83	0.402913	0.000170581	0.222078	0.0568757	0.019589
cg02027969	rs985273	-159	47	53	0.257282	1.08211e-08	-0.393778	0.0632045	1.81926e-05
cg02027969	rs6144097:116335443:CACCCTGTGATCTCAA:C	38	47	53	0.257282	1.1351e-08	-0.393199	0.0632168	1.88513e-05
cg02027969	rs2497747:116336372:C:A	967	47	53	0.257282	1.1351e-08	-0.393199	0.0632168	1.88513e-05
cg02027969	rs2497748:116337332:G:A	1927	47	53	0.257282	1.1351e-08	-0.393199	0.0632168	1.88513e-05
cg02027969	rs2497749:116337973:T:A	2568	47	53	0.257282	1.1351e-08	-0.393199	0.0632168	1.88513e-05
cg02027969	rs2483573:116338212:G:C	2807	52	65	0.315534	1.79193e-06	-0.291662	0.0575041	0.00070083
cg02027969	rs1333686:116342039:A:G	6634	61	82	0.398058	0.000169436	0.219139	0.0560959	0.0194932
cg02027969	rs9421188:116342929:C:A	7524	47	54	0.262136	1.01403e-08	-0.390976	0.062613	1.73993e-05
cg02027969	rs12357781:116343076:A:G	7671	61	82	0.398058	0.00016899	0.219205	0.0561022	0.0194552
cg02027969	rs12772307:116343977:G:A	8572	61	82	0.398058	0.000168684	0.219275	0.0561129	0.0194324
cg02531929	10:116460496:G:GA	-8521	16	18	0.0873786	0.000411143	-0.337822	0.0924442	0.0362542
cg02531929	rs79453521:116461237:A:G	-7780	15	17	0.0825243	0.000100285	-0.376388	0.0929148	0.0134198
cg02531929	rs79312688:116466202:G:C	-2815	15	17	0.0825243	9.94421e-05	-0.377227	0.0930691	0.0133406
cg02531929	rs114947364:116467747:C:T	-1270	15	17	0.0825243	0.000100657	-0.377319	0.0931677	0.0134567
cg02531929	rs76880362:116468970:T:C	-47	15	17	0.0825243	9.98685e-05	-0.377694	0.0932111	0.0133827
cg00724095	rs217194:116463080:T:C	-6908	61	78	0.378641	2.45697e-05	-0.246483	0.0557234	0.00481337
cg07743805	rs11196904:116523940:T:C	-4642	77	101	0.490291	0.000418735	0.10895	0.0298574	0.0366977
cg07743805	rs10885606:116537035:T:A	8453	66	84	0.407767	0.000275124	0.1109	0.0294168	0.0274472
cg10008731	rs17092497:116612628:G:A	-6708	58	74	0.359223	6.42996e-05	-0.153136	0.0367165	0.0096988
cg10008731	rs7918253:116614501:T:C	-4835	58	74	0.359223	6.47248e-05	-0.153262	0.0367621	0.00974817
cg10008731	rs7918388:116614563:T:C	-4773	58	74	0.359223	6.47248e-05	-0.153262	0.0367621	0.00974817
cg10008731	rs3180654:116615045:T:C	-4291	58	74	0.359223	6.47248e-05	-0.153262	0.0367621	0.00974817
cg10008731	rs10490908:116616162:T:C	-3174	58	74	0.359223	6.47248e-05	-0.153262	0.0367621	0.00974817
cg10008731	rs34683721:116619849:G:A	513	58	74	0.359223	6.42418e-05	-0.153391	0.0367755	0.00969248
cg10008731	rs7072364:116620840:G:A	1504	58	74	0.359223	6.40049e-05	-0.153459	0.0367832	0.00966696
cg10008731	rs34064819:116621154:C:A	1818	58	74	0.359223	6.40049e-05	-0.153459	0.0367832	0.00966696
cg10008731	rs41284358:116622339:A:G	3003	58	74	0.359223	6.42418e-05	-0.153391	0.0367755	0.00969248
cg10008731	rs34310961:116623010:A:AT	3674	58	74	0.359223	6.42418e-05	-0.153391	0.0367755	0.00969248
cg10008731	rs1046492:116624067:C:T	4731	58	74	0.359223	6.42418e-05	-0.153391	0.0367755	0.00969248
cg10008731	rs61868018:116624809:T:C	5473	58	74	0.359223	6.42418e-05	-0.153391	0.0367755	0.00969248
cg10008731	rs7923295:116625159:C:G	5823	58	74	0.359223	6.42418e-05	-0.153391	0.0367755	0.00969248
cg10008731	rs7895551:116625481:C:T	6145	58	74	0.359223	6.38732e-05	-0.153481	0.0367834	0.00965273
cg10008731	rs60820172:116625891:C:T	6555	58	74	0.359223	6.38732e-05	-0.153481	0.0367834	0.00965273
cg10008731	rs7093674:116626907:T:G	7571	58	74	0.359223	6.38732e-05	-0.153481	0.0367834	0.00965273
cg10008731	rs7075888:116627117:C:T	7781	58	74	0.359223	6.38732e-05	-0.153481	0.0367834	0.00965273
cg10008731	rs7094072:116627160:T:G	7824	58	74	0.359223	6.38732e-05	-0.153481	0.0367834	0.00965273
cg10008731	rs1966384:116627910:G:T	8574	58	74	0.359223	5.35601e-05	-0.155354	0.0368186	0.00848795
cg10008731	rs7909657:116629096:C:G	9760	58	74	0.359223	6.38732e-05	-0.153481	0.0367834	0.00965273
cg10008731	rs7909566:116629136:A:G	9800	58	74	0.359223	6.38732e-05	-0.153481	0.0367834	0.00965273
cg08188268	rs61868024:116637939:A:G	3097	63	80	0.38835	0.00062795	-0.150838	0.0427332	0.0484712
cg08188268	rs35453961:116638166:T:C	3324	63	80	0.38835	0.000622617	-0.150826	0.0426988	0.0481908
cg08188268	rs148119016:116639171:AAATGC:A	4329	63	80	0.38835	0.000617176	-0.150941	0.0427	0.0478916
cg08188268	rs11196959:116640176:T:C	5334	63	80	0.38835	0.000593333	-0.151636	0.0427552	0.0466075
cg08188268	rs10885622	9002	63	79	0.383495	0.00038441	-0.158742	0.0432086	0.0346202
cg08188268	rs7898347:116644324:G:A	9482	63	79	0.383495	0.000405699	-0.158589	0.0433515	0.0359246
cg08188268	rs7918129:116644467:T:C	9625	63	79	0.383495	0.000405699	-0.158589	0.0433515	0.0359246
cg07733920	rs7093686:116626940:T:C	-9417	67	89	0.432039	0.000478276	0.0979526	0.0271324	0.040172
cg07733920	rs36036948:116631649:A:G	-4708	57	73	0.354369	0.000506612	0.100809	0.0280549	0.0417856
cg07733920	rs11319655:116637637:AT:A	1280	74	100	0.485437	0.000106913	0.109805	0.0272236	0.0140471
cg09944435	rs7094072:116627160:T:G	-9971	58	74	0.359223	0.000200485	0.202769	0.0525382	0.0219662
cg09944435	rs1966384:116627910:G:T	-9221	58	74	0.359223	0.000223338	0.201904	0.052729	0.0237336
cg09944435	rs7909657:116629096:C:G	-8035	58	74	0.359223	0.000200485	0.202769	0.0525382	0.0219662
cg09944435	rs7909566:116629136:A:G	-7995	58	74	0.359223	0.000200485	0.202769	0.0525382	0.0219662
cg09944435	rs35628210:116630031:G:A	-7100	58	74	0.359223	0.000184695	0.203954	0.0525323	0.0207519
cg09944435	rs17092542:116630289:G:A	-6842	58	74	0.359223	0.000200485	0.202769	0.0525382	0.0219662
cg09944435	rs12773943:116631184:G:A	-5947	58	74	0.359223	0.000196855	0.203598	0.0526829	0.0216958
cg09944435	rs36036948:116631649:A:G	-5482	57	73	0.354369	9.66715e-05	0.211843	0.0521668	0.0130793
cg09944435	rs35010779:116631816:A:C	-5315	58	74	0.359223	0.000198335	0.203808	0.052766	0.0218046
cg09944435	rs35622181:116631976:C:T	-5155	58	74	0.359223	0.000197159	0.203975	0.0527864	0.0217167
cg09944435	rs7074729:116632257:C:G	-4874	58	73	0.354369	0.000196975	0.20411	0.0528178	0.0217055
cg09944435	rs11462305:116634024:A:AT	-3107	58	73	0.354369	0.00019786	0.204181	0.0528534	0.0217682
cg09944435	rs7072356:116634651:T:C	-2480	58	73	0.354369	0.000195798	0.204429	0.0528775	0.0216177
cg09944435	rs11818114:116634878:G:C	-2253	58	73	0.354369	0.000195815	0.204455	0.0528844	0.0216186
cg09944435	rs11818115:116634891:G:A	-2240	58	73	0.354369	0.000195815	0.204455	0.0528844	0.0216186
cg09944435	rs12765350:116635305:G:A	-1826	58	73	0.354369	0.000195815	0.204455	0.0528844	0.0216186
cg09944435	rs11319655:116637637:AT:A	506	74	100	0.485437	7.74956e-05	0.211206	0.051255	0.0111308
cg09944435	rs17794346:116643095:T:C	5964	46	55	0.26699	0.0002784	0.216873	0.0575781	0.0276842
cg08240913	rs2694763:117967174:C:T	-1851	66	86	0.417476	0.00061837	0.0764219	0.0216226	0.0479621
cg08240913	rs2694764:117967499:T:C	-1526	66	86	0.417476	0.000644392	0.0761474	0.02162	0.0493399
cg08240913	rs2694766:117967808:A:G	-1217	67	87	0.42233	0.000353387	0.0800479	0.0216452	0.0326181
cg08240913	rs2694767	-695	69	90	0.436893	0.000310208	0.0797816	0.0213568	0.0298142
cg08240913	rs2694768:117968771:A:G	-254	66	86	0.417476	0.000627225	0.0757972	0.0214716	0.0484356
cg08240913	rs2694769:117968826:A:G	-199	66	86	0.417476	0.000628099	0.0758128	0.0214785	0.0484811
cg08240913	rs2245070:117969928:G:C	903	66	86	0.417476	0.000638505	0.0758798	0.0215273	0.049018
cg08240913	rs2245164:117970165:G:A	1140	66	86	0.417476	0.000628837	0.0759377	0.021516	0.04852
cg08240913	rs2694770:117970898:T:C	1873	66	86	0.417476	0.000628837	0.0759377	0.021516	0.04852
cg08240913	rs2694771:117971666:G:T	2641	66	86	0.417476	0.000626464	0.0760127	0.0215304	0.0483971
cg08240913	rs4751956:117973921:G:A	4896	66	86	0.417476	0.000639447	-0.0760698	0.0215839	0.0490653
cg08240913	rs11197587:117975006:G:C	5981	66	86	0.417476	0.000630096	-0.076199	0.0215937	0.0485914
cg08240913	rs3781552:117977297:G:A	8272	66	86	0.417476	0.00065476	-0.07611	0.0216386	0.049867
cg08240913	rs4562724:117977650:C:T	8625	68	88	0.427184	0.000535971	-0.0786908	0.022001	0.0434688
cg08240913	rs2901099:117977665:G:A	8640	66	86	0.417476	0.000654662	-0.0761642	0.0216538	0.0498632
cg08240913	rs1076972:117978305:G:A	9280	66	86	0.417476	0.000634572	-0.0763883	0.0216603	0.0488201
cg08240913	rs1107030:117978324:T:G	9299	66	86	0.417476	0.000656947	-0.0761585	0.0216585	0.0499884
cg06131833	rs60900963:118374875:T:C	-3350	47	54	0.262136	0.000305455	0.096603	0.0258291	0.0295025
cg06131833	rs11197759:118375425:A:G	-2800	47	54	0.262136	0.00030579	0.0965937	0.0258288	0.0295227
cg06131833	rs370404292:118376871:GTGGTT:G	-1354	47	54	0.262136	0.000307564	0.0965848	0.0258378	0.0296423
cg06131833	rs61872805:118376874:G:T	-1351	47	54	0.262136	0.000310048	0.0965088	0.0258335	0.0298052
cg06131833	rs66586183:118376885:TG:T	-1340	47	54	0.262136	0.000307564	0.0965848	0.0258378	0.0296423
cg06131833	rs10885991:118377746:A:G	-479	48	57	0.276699	0.000477108	0.0891217	0.0246813	0.0401107
cg06131833	rs10885992:118379855:C:T	1630	48	57	0.276699	0.000493954	0.0888806	0.0246842	0.0410708
cg06131833	rs3781562:118381258:G:A	3033	48	56	0.271845	0.000532021	0.0895899	0.025033	0.0432566
cg06131833	rs12267882:118384663:T:C	6438	55	71	0.34466	0.000460448	-0.0791999	0.0218706	0.039129
cg06131833	rs10885993:118384841:T:C	6616	55	71	0.34466	0.000457245	-0.0792481	0.0218715	0.0389573
cg06131833	rs10885994:118385055:T:C	6830	55	71	0.34466	0.000458187	-0.0792264	0.0218692	0.0390048
cg06131833	rs9787637:118386325:C:A	8100	55	71	0.34466	0.000458187	-0.0792264	0.0218692	0.0390048
cg06131833	rs2286778:118386654:A:C	8429	55	71	0.34466	0.000499809	-0.0786808	0.0218725	0.0413933
cg06131833	rs9787662:118386828:C:A	8603	55	71	0.34466	0.000458187	-0.0792264	0.0218692	0.0390048
cg06131833	rs9787663:118386869:G:A	8644	55	71	0.34466	0.000458187	-0.0792264	0.0218692	0.0390048
cg06131833	rs9787450:118386953:T:C	8728	55	71	0.34466	0.000451393	-0.0793459	0.0218758	0.0386116
cg06131833	rs9787451:118386957:T:C	8732	55	71	0.34466	0.000451393	-0.0793459	0.0218758	0.0386116
cg06131833	rs9787664:118387022:C:A	8797	55	71	0.34466	0.000452723	-0.0793485	0.0218817	0.0386905
cg06131833	rs9787530:118387038:A:T	8813	55	71	0.34466	0.000452723	-0.0793485	0.0218817	0.0386905
cg06131833	rs9787666:118387066:G:A	8841	55	71	0.34466	0.000452723	-0.0793485	0.0218817	0.0386905
cg06131833	rs12768167:118387148:C:T	8923	55	71	0.34466	0.000465289	-0.0791541	0.0218764	0.0394137
cg06131833	rs12768516:118387152:G:A	8927	55	71	0.34466	0.000465289	-0.0791541	0.0218764	0.0394137
cg06131833	rs11544712:118387282:A:G	9057	55	71	0.34466	0.000451393	-0.0793459	0.0218758	0.0386116
cg25120325	rs12415178:118380345:C:T	-26	58	77	0.373786	0.000573434	-0.294402	0.0827734	0.0455593
cg00098286	rs4751995:118397884:A:G	-6745	69	91	0.441748	0.000127047	0.14482	0.0363305	0.0158884
cg00098286	rs4751996:118397894:A:G	-6735	69	91	0.441748	0.000127047	0.14482	0.0363305	0.0158884
cg00098286	rs7910135:118398046:C:A	-6583	69	91	0.441748	0.000126858	0.144819	0.0363265	0.0158743
cg00098286	rs2301179	-9	69	92	0.446602	8.04757e-05	0.14589	0.035492	0.0114392
cg00098286	rs34483247:118406219:C:CT	1590	62	82	0.398058	0.000145328	0.140966	0.0356958	0.017502
cg00098286	rs9731817:118406362:C:G	1733	62	82	0.398058	0.000168896	0.139741	0.0357632	0.0194483
cg00098286	rs10787711:118406784:G:A	2155	66	88	0.427184	1.79931e-05	0.156721	0.0348016	0.00383037
cg00098286	rs11197783:118407116:T:A	2487	67	89	0.432039	2.65365e-05	0.154598	0.0351085	0.00509118
cg00098286	rs2420318:118407568:G:A	2939	67	89	0.432039	2.67503e-05	0.154539	0.0351117	0.00512129
cg00098286	rs2901113:118407682:T:A	3053	67	89	0.432039	2.70552e-05	0.154443	0.0351134	0.00516014
cg00098286	rs2901114:118407702:G:A	3073	67	89	0.432039	2.70552e-05	0.154443	0.0351134	0.00516014
cg00098286	rs2218584:118408642:C:T	4013	61	81	0.393204	0.000134136	0.140472	0.0353724	0.0165106
cg00098286	rs7067905:118411522:G:T	6893	68	91	0.441748	4.03285e-05	0.15054	0.0350552	0.00688616
cg00098286	rs4751998:118411722:A:G	7093	68	91	0.441748	4.07335e-05	0.150434	0.035052	0.00693144
cg00098286	rs12571521	7681	68	91	0.441748	4.46784e-05	0.149584	0.0350527	0.00743531
cg00098286	rs2420319:118412449:G:A	7820	72	98	0.475728	1.01251e-05	0.161154	0.0346667	0.00250918
cg00098286	rs367984004:118412494:GGGAT:G	7865	68	91	0.441748	4.39296e-05	0.149729	0.0350502	0.00734049
cg00098286	rs2084278:118413666:C:T	9037	72	99	0.480583	2.54441e-05	0.152883	0.0346335	0.0049394
cg14919929	rs7920906:118506111:G:A	-772	68	94	0.456311	5.28627e-05	-0.177326	0.0419913	0.00840411
cg14919929	rs740599	-128	68	94	0.456311	4.26658e-05	-0.17822	0.0416445	0.00717638
cg14919929	rs740598:118506899:G:A	16	67	93	0.451456	7.84076e-05	-0.172604	0.0419193	0.0112228
cg22711009	rs740363	-527	67	88	0.427184	4.23305e-06	0.223569	0.0459602	0.00131176
cg22711009	rs1626678:118576146:G:A	13	68	89	0.432039	2.70272e-06	0.23005	0.0462565	0.000942173
cg22711009	rs10787730:118577736:C:T	1603	68	90	0.436893	1.67715e-05	0.210269	0.0465075	0.00363942
cg22711009	rs11596173:118578918:C:T	2785	69	91	0.441748	4.9412e-06	0.223467	0.0462996	0.00146941
cg22711009	rs1681725:118585449:A:G	9316	72	96	0.466019	5.74453e-05	-0.20207	0.0481023	0.00892715
cg09194742	rs740363	-553	67	88	0.427184	0.000512821	0.134291	0.0374103	0.0421417
cg05482603	rs7083543:118616110:C:T	8391	48	53	0.257282	1.691e-05	0.196533	0.0434895	0.00366057
cg05482603	rs7087685:118616537:G:A	8818	48	53	0.257282	1.71438e-05	0.196383	0.04349	0.00369922
cg05482603	rs9421248:118617261:T:C	9542	48	53	0.257282	1.61629e-05	0.195994	0.0432601	0.00354708
cg17677490	rs7083543:118616110:C:T	7971	48	53	0.257282	6.16e-07	0.482688	0.0906653	0.000322212
cg17677490	rs7087685:118616537:G:A	8398	48	53	0.257282	6.16851e-07	0.482607	0.0906555	0.000322493
cg17677490	rs9421248:118617261:T:C	9122	48	53	0.257282	8.00819e-07	0.476012	0.0904528	0.000389122
cg20453338	rs7083543:118616110:C:T	5041	48	53	0.257282	0.000133456	-0.220356	0.0554685	0.0164526
cg20453338	rs7087685:118616537:G:A	5468	48	53	0.257282	0.000132905	-0.220384	0.0554597	0.0164046
cg20453338	rs9421248:118617261:T:C	6192	48	53	0.257282	0.00012055	-0.22062	0.0551469	0.0153097
cg20453338	rs1637570:118619529:G:A	8460	58	67	0.325243	0.000193242	0.199662	0.0515952	0.0214176
cg20453338	rs4752015:118619783:A:G	8714	47	53	0.257282	5.84933e-05	-0.22796	0.0543276	0.00904712
cg20453338	rs9420215:118620777:T:C	9708	48	54	0.262136	9.87535e-05	-0.217067	0.0535297	0.0132797
cg20453338	rs2170862	9927	48	54	0.262136	9.32512e-05	-0.216568	0.0532021	0.01273
cg02271863	rs10510025:118650996:C:T	4622	48	55	0.26699	0.000402247	0.135955	0.0371392	0.0357186
cg24405543	rs7893993	1301	64	81	0.393204	4.09565e-06	-0.483717	0.0992755	0.00128068
cg12459772	rs10795904:11917404:C:T	-438	11	13	0.0631068	6.00068e-05	-0.182599	0.0435879	0.00922036
cg05136032	rs10906055	4301	21	23	0.11165	0.000485632	-0.148578	0.0412065	0.0405903
cg05136032	rs7915351:12099833:G:T	9185	27	30	0.145631	1.3385e-05	-0.165512	0.0361505	0.00307988
cg05136032	rs7904407:12099837:T:G	9189	27	30	0.145631	1.3091e-05	-0.165696	0.0361463	0.00302796
cg15699057	rs11257558:12178339:A:G	-8195	66	81	0.393204	0.000148534	-0.101656	0.025781	0.0177786
cg15699057	rs10906083	-7264	66	81	0.393204	0.000133601	-0.102148	0.0257147	0.0164645
cg00429044	rs11257558:12178339:A:G	-8903	66	81	0.393204	0.000305252	0.180423	0.048238	0.029488
cg00429044	rs11257559:12179187:G:A	-8055	58	69	0.334951	2.87387e-05	-0.213209	0.048647	0.00539447
cg00429044	rs10906083	-7972	66	81	0.393204	0.000315228	0.179748	0.0481763	0.0301527
cg00429044	rs35710960:12180465:A:G	-6777	58	69	0.334951	2.757e-05	-0.213467	0.0485864	0.00523376
cg00429044	rs34170068:12180569:C:A	-6673	58	70	0.339806	2.30879e-05	-0.214379	0.0482906	0.0045957
cg00429044	rs12218478:12181892:C:T	-5350	58	69	0.334951	2.75923e-05	-0.213428	0.04858	0.00523716
cg00429044	rs7080938:12182446:T:C	-4796	58	69	0.334951	2.77388e-05	-0.213319	0.0485703	0.00525659
cg00429044	rs35693884:12183140:G:A	-4102	58	69	0.334951	2.90287e-05	-0.212901	0.0486056	0.00543462
cg00429044	rs11257563:12183858:C:T	-3384	58	69	0.334951	2.90772e-05	-0.212861	0.0486013	0.00544063
cg00429044	rs12777445:12187121:T:C	-121	58	69	0.334951	2.92696e-05	-0.212535	0.0485459	0.00546629
cg00429044	rs4750171:12187256:G:A	14	58	69	0.334951	2.75619e-05	-0.213072	0.0484959	0.0052325
cg00429044	rs11594985:12188806:C:T	1564	58	69	0.334951	3.03865e-05	-0.214926	0.0492013	0.00560726
cg00429044	rs7082294:12193066:G:A	5824	52	63	0.305825	4.58188e-05	-0.207592	0.0487219	0.00757274
cg00429044	rs2895502:12196930:G:A	9688	57	68	0.330097	3.20617e-05	-0.210496	0.0483416	0.00582125
cg25638783	rs4397742:12276089:A:G	-9833	27	29	0.140777	8.03116e-05	0.27442	0.0667514	0.0114226
cg25638783	rs4514317:12276305:A:G	-9617	60	76	0.368932	1.95711e-06	0.218376	0.0432346	0.000746118
cg25638783	rs34428576:12281111:G:A	-4811	28	30	0.145631	7.17309e-05	0.263568	0.0636411	0.0105012
cg25638783	rs7911095:12282002:G:C	-3920	63	76	0.368932	1.03917e-06	0.238202	0.0457966	0.000468445
cg25638783	rs150469992:12282749:CCCCAGCTACT:C	-3173	26	28	0.135922	7.57195e-05	0.277625	0.0672716	0.0109381
cg25638783	rs142354895:12283965:G:GTTC	-1957	73	91	0.441748	6.34612e-06	-0.220188	0.0462102	0.0017785
cg25638783	rs35475841:12284082:A:AC	-1840	74	95	0.461165	0.000186811	-0.178089	0.045908	0.0209224
cg25638783	rs10906106:12287402:C:G	1480	28	30	0.145631	7.13426e-05	0.26467	0.0638848	0.0104597
cg25638783	rs11257615:12289775:G:A	3853	28	30	0.145631	6.70902e-05	0.265741	0.0638891	0.0100136
cg25638783	rs1051055:12292454:A:G	6532	58	69	0.334951	0.000168439	-0.192357	0.0492196	0.0194157
cg25638783	rs10795944:12292636:A:T	6714	67	83	0.402913	3.56382e-05	-0.200042	0.0462337	0.00629025
cg25638783	rs11257622:12295339:T:C	9417	28	30	0.145631	6.49287e-05	0.268016	0.0643006	0.00977177
cg10894156	rs11257655	107	35	37	0.179612	0.000235746	-0.17675	0.0463446	0.0246658
cg01750172	rs7094793:12388925:C:T	-3461	73	95	0.461165	0.000538556	-0.0959214	0.0268291	0.0436086
cg01750172	rs2997063	-3206	73	95	0.461165	0.000528964	-0.0960086	0.0268138	0.0430832
cg01750172	rs7070092:12390653:C:T	-1733	73	95	0.461165	0.000540629	-0.0959949	0.0268582	0.0437201
cg01750172	rs7475265:12391497:G:T	-889	73	95	0.461165	0.000524291	-0.0962611	0.0268647	0.0428048
cg01750172	rs2801501:12395826:T:C	3440	73	95	0.461165	0.000512451	-0.0967002	0.0269367	0.0421263
cg01750172	rs2801500:12395832:G:C	3446	73	95	0.461165	0.000406462	-0.098949	0.0270525	0.0359723
cg10704395	rs4750212	5314	35	39	0.18932	0.000433132	0.164723	0.0452641	0.0375431
cg12273284	rs6602587:12487909:C:G	-2936	60	71	0.34466	0.000408331	-0.303224	0.0829312	0.0360818
cg12273284	rs6602588	-2849	60	69	0.334951	0.000293178	-0.322254	0.0858926	0.0286788
cg04687190	rs7085366:12506212:C:G	-2630	54	66	0.320388	4.69143e-07	-0.324935	0.0603172	0.000263451
cg04687190	rs200321849:12506827:A:G	-2015	50	62	0.300971	4.40345e-08	-0.345178	0.0582817	4.74591e-05
cg04687190	rs1571211:12508867:G:C	25	54	66	0.320388	4.74636e-07	-0.323229	0.0600306	0.000265609
cg04687190	rs1571212	114	53	65	0.315534	8.81953e-08	-0.339669	0.0588908	7.76545e-05
cg04687190	rs1977440:12509293:A:C	451	53	65	0.315534	6.83967e-08	-0.342476	0.0587978	6.47928e-05
cg04687190	rs7915889:12509571:A:G	729	53	65	0.315534	5.68775e-08	-0.344376	0.0587097	5.69761e-05
cg04687190	rs7898909:12509661:G:A	819	53	65	0.315534	5.21144e-08	-0.345414	0.058692	5.35146e-05
cg04687190	rs11257811:12510051:C:T	1209	53	65	0.315534	4.02667e-08	-0.347867	0.05854	4.46457e-05
cg04687190	rs2768411	2887	64	85	0.412621	9.67166e-06	-0.263712	0.0565889	0.00242568
cg04687190	rs2768412:12511762:A:G	2920	64	84	0.407767	1.68395e-05	-0.259834	0.0574834	0.00364928
cg04687190	rs7907938:12511801:G:A	2959	61	78	0.378641	1.15471e-06	-0.299768	0.0579102	0.000505524
cg04687190	rs7894008:12511933:A:C	3091	61	78	0.378641	1.17508e-06	-0.299849	0.0579721	0.000512155
cg04687190	rs7912089:12512577:G:A	3735	61	79	0.383495	6.34307e-06	-0.277628	0.0582634	0.0017779
cg04687190	rs7912090:12512579:G:A	3737	61	79	0.383495	6.34307e-06	-0.277628	0.0582634	0.0017779
cg10476206	rs2399847:12537975:C:T	-5470	15	15	0.0728155	0.000315351	0.230837	0.0618709	0.0301597
cg10476206	rs7098679:12542179:C:T	-1266	42	49	0.237864	0.000207476	0.133776	0.0347486	0.0225121
cg10476206	rs143485675:12542204:G:T	-1241	28	29	0.140777	9.1275e-09	0.260781	0.041611	1.62301e-05
cg10476206	rs77058724:12543003:C:T	-442	28	29	0.140777	9.12592e-09	0.261306	0.0416946	1.62301e-05
cg10476206	rs45594139:12545332:C:T	1887	31	32	0.15534	6.93991e-06	0.20288	0.0427764	0.00190022
cg10476206	rs192128746:12546107:G:A	2662	24	24	0.116505	1.41875e-06	0.2527	0.0492819	0.000588531
cg10476206	rs79244075:12546308:C:T	2863	31	33	0.160194	5.16798e-06	0.201469	0.0418374	0.00151992
cg10476206	rs143816204:12547010:ACT:A	3565	30	32	0.15534	1.01646e-05	0.196728	0.0423282	0.00251686
cg10476206	rs17492457:12547322:A:T	3877	30	32	0.15534	1.0496e-05	0.196395	0.0423298	0.00257664
cg10476206	rs113544193:12548182:C:T	4737	34	36	0.174757	3.81615e-06	0.199889	0.0408796	0.00121522
cg23903782	rs2399877:12685221:C:T	4902	19	19	0.092233	0.000372569	-0.145864	0.0396058	0.0338778
cg16123687	rs7074358:12738278:G:A	-6349	57	67	0.325243	0.000100217	0.321963	0.0794759	0.0134134
cg04836423	rs7077423	-361	58	73	0.354369	0.000497456	0.0781122	0.021706	0.0412646
cg04836423	rs151112881:12771928:T:TCGTCC	-113	52	64	0.31068	8.87581e-06	0.102229	0.0218363	0.00227944
cg00098692	rs60163353:12872824:CAGTCATGGGAAGTCCTGTTGGTTG:C	-5090	59	80	0.38835	1.51805e-05	0.418045	0.0919481	0.00338469
cg00098692	rs2431623:12872880:A:G	-5034	59	80	0.38835	1.51464e-05	0.417863	0.0918967	0.00337902
cg00098692	rs1757063	-4562	49	62	0.300971	1.38389e-06	0.498059	0.0970204	0.000578554
cg00098692	rs1644395:12873463:A:G	-4451	53	69	0.334951	1.5475e-06	0.478082	0.0936133	0.000627809
cg00098692	rs2431637:12875263:G:A	-2651	57	75	0.364078	4.58821e-08	0.527245	0.08916	4.89465e-05
cg00098692	rs2431634:12875491:A:G	-2423	72	101	0.490291	5.72682e-08	0.507517	0.0865446	5.71975e-05
cg00098692	rs1047721:12876247:T:C	-1667	72	101	0.490291	5.28161e-08	0.509415	0.0866025	5.39603e-05
cg00098692	rs2482073:12876850:A:G	-1064	50	64	0.31068	1.26329e-06	0.492673	0.0955687	0.000541297
cg00098692	rs15980	-907	69	91	0.441748	1.33684e-09	0.583776	0.0874198	4.45694e-06
cg00098692	rs7500:12877510:C:T	-404	69	91	0.441748	1.33905e-09	0.583767	0.087423	4.45694e-06
cg00098692	rs1644402:12877584:T:C	-330	69	90	0.436893	8.77458e-10	0.595963	0.0880735	3.39346e-06
cg00098692	rs1757067:12877675:A:T	-239	69	90	0.436893	8.77458e-10	0.595963	0.0880735	3.39346e-06
cg00098692	rs1757068:12877925:A:G	11	69	92	0.446602	1.87844e-09	0.573013	0.0867438	5.50548e-06
cg00098692	rs1644403:12878020:C:A	106	69	90	0.436893	8.77458e-10	0.595963	0.0880735	3.39346e-06
cg00098692	rs1757069:12878043:G:A	129	69	90	0.436893	8.77458e-10	0.595963	0.0880735	3.39346e-06
cg00098692	rs1644404:12878175:T:C	261	69	90	0.436893	8.77458e-10	0.595963	0.0880735	3.39346e-06
cg00098692	rs1757070:12878354:G:C	440	49	61	0.296117	6.56152e-07	0.520788	0.098093	0.000337107
cg00098692	rs1644405:12878462:C:G	548	69	90	0.436893	8.78936e-10	0.595954	0.0880768	3.39795e-06
cg00098692	rs58868219:12878484:ACTCT:A	570	69	90	0.436893	8.78936e-10	0.595954	0.0880768	3.39795e-06
cg00098692	rs2112646:12878563:G:A	649	69	90	0.436893	8.54413e-10	0.596329	0.0880546	3.3567e-06
cg00098692	rs76139027:12879011:ATAC:A	1097	69	91	0.441748	8.40665e-10	0.589702	0.0870322	3.33158e-06
cg00098692	rs1644407:12879098:T:C	1184	69	91	0.441748	8.40665e-10	0.589702	0.0870322	3.33158e-06
cg00098692	rs1644408:12879199:C:A	1285	69	91	0.441748	8.40665e-10	0.589702	0.0870322	3.33158e-06
cg00098692	rs1757071:12879293:G:A	1379	69	91	0.441748	8.19593e-10	0.590385	0.0870645	3.29308e-06
cg00098692	rs1757072:12879369:A:G	1455	52	64	0.31068	7.14649e-05	0.4285	0.103441	0.0104727
cg00098692	rs1757073:12879490:G:A	1576	69	91	0.441748	8.42286e-10	0.589686	0.0870351	3.33158e-06
cg00098692	rs35675643:12879945:C:CA	2031	69	92	0.446602	1.20812e-09	0.579566	0.0865122	4.20889e-06
cg00098692	rs2431633:12879969:G:A	2055	68	90	0.436893	1.56655e-09	0.578126	0.0870108	4.86506e-06
cg00098692	rs1644410:12880200:T:C	2286	69	92	0.446602	1.26355e-09	0.578095	0.0864148	4.32788e-06
cg00098692	rs1757074:12880224:T:C	2310	69	92	0.446602	1.26355e-09	0.578095	0.0864148	4.32788e-06
cg00098692	rs1757075:12880428:G:A	2514	64	81	0.393204	4.06751e-07	0.517063	0.0953974	0.000237023
cg00098692	rs1757076:12880490:C:T	2576	69	92	0.446602	1.24221e-09	0.57859	0.0864423	4.28828e-06
cg00098692	rs1757077:12880555:G:A	2641	69	92	0.446602	1.26614e-09	0.578075	0.0864175	4.33262e-06
cg00098692	rs2482072:12880984:C:A	3070	63	87	0.42233	5.76718e-05	0.386457	0.0920181	0.00895454
cg00098692	rs2431631:12881018:C:T	3104	69	92	0.446602	1.26614e-09	0.578075	0.0864175	4.33262e-06
cg00098692	rs1644411:12881665:C:T	3751	42	51	0.247573	0.000195525	0.423894	0.109633	0.0215987
cg00098692	rs1627707	3941	59	78	0.378641	3.40787e-08	0.528187	0.0883366	3.99707e-05
cg00098692	rs1644412:12882041:C:T	4127	52	64	0.31068	7.09904e-05	0.428662	0.103435	0.0104264
cg00098692	rs1644413:12883313:G:T	5399	42	51	0.247573	0.000195875	0.424133	0.109709	0.0216229
cg00098692	rs1644414:12883397:T:C	5483	42	51	0.247573	0.000195875	0.424133	0.109709	0.0216229
cg00098692	rs1644415:12884401:C:G	6487	53	66	0.320388	1.87133e-05	0.453965	0.101033	0.0039419
cg00098692	rs36076627:12887671:A:G	9757	47	57	0.276699	0.000513358	-0.397065	0.110622	0.0421706
cg27497962	rs60163353:12872824:CAGTCATGGGAAGTCCTGTTGGTTG:C	-5144	59	80	0.38835	5.99639e-06	0.560575	0.117302	0.00170337
cg27497962	rs2431623:12872880:A:G	-5088	59	80	0.38835	5.94823e-06	0.560464	0.117229	0.00169322
cg27497962	rs1757063	-4616	49	62	0.300971	2.73276e-07	0.677606	0.122943	0.00017741
cg27497962	rs1644395:12873463:A:G	-4505	53	69	0.334951	5.36291e-07	0.638809	0.119268	0.000290911
cg27497962	rs2431637:12875263:G:A	-2705	57	75	0.364078	2.12968e-07	0.64852	0.116462	0.000147692
cg27497962	rs2431634:12875491:A:G	-2477	72	101	0.490291	1.39403e-08	0.678518	0.109878	2.18525e-05
cg27497962	rs1047721:12876247:T:C	-1721	72	101	0.490291	1.26073e-08	0.681246	0.109931	2.03546e-05
cg27497962	rs2482073:12876850:A:G	-1118	50	64	0.31068	2.02529e-07	0.674397	0.12086	0.000142967
cg27497962	rs15980	-961	69	91	0.441748	7.48599e-10	0.760806	0.111882	3.0968e-06
cg27497962	rs7500:12877510:C:T	-458	69	91	0.441748	7.5403e-10	0.760705	0.111893	3.10781e-06
cg27497962	rs1644402:12877584:T:C	-384	69	90	0.436893	5.16407e-10	0.775645	0.112773	2.46602e-06
cg27497962	rs1757067:12877675:A:T	-293	69	90	0.436893	5.16407e-10	0.775645	0.112773	2.46602e-06
cg27497962	rs1757068:12877925:A:G	-43	69	92	0.446602	9.20843e-10	0.749122	0.110874	3.51274e-06
cg27497962	rs1644403:12878020:C:A	52	69	90	0.436893	5.16407e-10	0.775645	0.112773	2.46602e-06
cg27497962	rs1757069:12878043:G:A	75	69	90	0.436893	5.16407e-10	0.775645	0.112773	2.46602e-06
cg27497962	rs1644404:12878175:T:C	207	69	90	0.436893	5.16407e-10	0.775645	0.112773	2.46602e-06
cg27497962	rs1757070:12878354:G:C	386	49	61	0.296117	1.20113e-07	0.707776	0.124208	9.744e-05
cg27497962	rs1644405:12878462:C:G	494	69	90	0.436893	5.20245e-10	0.775542	0.112784	2.477e-06
cg27497962	rs58868219:12878484:ACTCT:A	516	69	90	0.436893	5.20245e-10	0.775542	0.112784	2.477e-06
cg27497962	rs2112646:12878563:G:A	595	69	90	0.436893	5.098e-10	0.775886	0.112764	2.44766e-06
cg27497962	rs76139027:12879011:ATAC:A	1043	69	91	0.441748	4.13895e-10	0.770294	0.111247	2.15726e-06
cg27497962	rs1644407:12879098:T:C	1130	69	91	0.441748	4.13895e-10	0.770294	0.111247	2.15726e-06
cg27497962	rs1644408:12879199:C:A	1231	69	91	0.441748	4.13895e-10	0.770294	0.111247	2.15726e-06
cg27497962	rs1757071:12879293:G:A	1325	69	91	0.441748	4.01743e-10	0.77124	0.111283	2.11541e-06
cg27497962	rs1757072:12879369:A:G	1401	52	64	0.31068	9.86236e-06	0.608265	0.130662	0.00246095
cg27497962	rs1757073:12879490:G:A	1522	69	91	0.441748	4.17074e-10	0.770185	0.111257	2.1697e-06
cg27497962	rs35675643:12879945:C:CA	1977	69	92	0.446602	5.60569e-10	0.758241	0.110519	2.58566e-06
cg27497962	rs2431633:12879969:G:A	2001	68	90	0.436893	1.06279e-09	0.750429	0.111567	3.85707e-06
cg27497962	rs1644410:12880200:T:C	2232	69	92	0.446602	6.01193e-10	0.755953	0.110421	2.70817e-06
cg27497962	rs1757074:12880224:T:C	2256	69	92	0.446602	6.01193e-10	0.755953	0.110421	2.70817e-06
cg27497962	rs1757075:12880428:G:A	2460	64	81	0.393204	4.618e-07	0.662689	0.122931	0.000260574
cg27497962	rs1757076:12880490:C:T	2522	69	92	0.446602	6.05214e-10	0.756213	0.110482	2.71947e-06
cg27497962	rs1757077:12880555:G:A	2587	69	92	0.446602	6.05802e-10	0.755841	0.110431	2.71975e-06
cg27497962	rs2482072:12880984:C:A	3016	63	87	0.42233	2.15008e-05	0.523031	0.117333	0.00436142
cg27497962	rs2431631:12881018:C:T	3050	69	92	0.446602	6.05802e-10	0.755841	0.110431	2.71975e-06
cg27497962	rs1644411:12881665:C:T	3697	42	51	0.247573	8.84016e-05	0.572151	0.140057	0.0122408
cg27497962	rs1627707	3887	59	78	0.378641	8.20306e-08	0.663197	0.11466	7.38331e-05
cg27497962	rs1644412:12882041:C:T	4073	52	64	0.31068	9.94315e-06	0.608051	0.130673	0.0024751
cg27497962	rs1644413:12883313:G:T	5345	42	51	0.247573	9.05488e-05	0.571755	0.140183	0.0124572
cg27497962	rs1644414:12883397:T:C	5429	42	51	0.247573	9.05488e-05	0.571755	0.140183	0.0124572
cg27497962	rs1644415:12884401:C:G	6433	53	66	0.320388	2.2276e-06	0.639671	0.127427	0.000816339
cg22681977	rs6602622:12932822:G:T	3743	73	96	0.466019	0.0002697	-0.0715635	0.018954	0.0270742
cg06702543	rs74120710:12937634:C:T	-7584	17	19	0.092233	1.46116e-05	-0.648046	0.142233	0.00329008
cg06702543	rs74120711:12937666:A:C	-7552	17	19	0.092233	1.65389e-05	-0.644177	0.142368	0.00360655
cg06702543	rs74120712:12937708:C:T	-7510	17	19	0.092233	1.4478e-05	-0.648584	0.142279	0.00326726
cg06702543	rs7096623:12943483:C:T	-1735	15	17	0.0825243	6.26328e-06	-0.686152	0.143903	0.00176153
cg06702543	rs2150661:12944156:C:G	-1062	63	77	0.373786	0.00054437	0.33263	0.0931189	0.0439248
cg06702543	rs4237429:12944793:C:G	-425	19	21	0.101942	3.96078e-10	-0.850773	0.122707	2.10932e-06
cg06702543	rs11369051:12944829:A:AC	-389	19	21	0.101942	3.94952e-10	-0.850862	0.122709	2.10891e-06
cg06702543	rs74120713:12944903:A:G	-315	14	16	0.0776699	1.45348e-07	-0.799481	0.14137	0.000112326
cg06702543	rs2026307:12944980:C:A	-238	19	21	0.101942	3.77007e-10	-0.851025	0.122561	2.04627e-06
cg06702543	rs1475611:12945203:T:C	-15	19	21	0.101942	3.72225e-10	-0.85158	0.122594	2.02785e-06
cg06702543	rs7089884:12945455:A:T	237	19	21	0.101942	3.52966e-10	-0.852102	0.122474	1.99186e-06
cg06702543	rs11258054:12945591:C:A	373	14	16	0.0776699	1.30276e-07	-0.801625	0.141131	0.000103849
cg06702543	rs35280879:12945851:GA:G	633	19	21	0.101942	3.2871e-10	-0.852689	0.122297	1.8952e-06
cg06702543	rs11258056:12945966:C:T	748	19	21	0.101942	3.28778e-10	-0.852671	0.122296	1.8952e-06
cg06702543	rs12259118:12946435:C:T	1217	16	18	0.0873786	2.76985e-06	-0.694918	0.139895	0.000959826
cg06702543	rs59486331:12947351:C:A	2133	16	18	0.0873786	2.69978e-06	-0.694863	0.13971	0.000941452
cg06702543	rs1929382:12947858:C:T	2640	16	18	0.0873786	2.61062e-06	-0.695238	0.139558	0.00091748
cg06702543	rs1929381:12947903:C:A	2685	16	18	0.0873786	2.61062e-06	-0.695238	0.139558	0.00091748
cg06702543	rs2225465:12948067:C:G	2849	16	18	0.0873786	2.60981e-06	-0.695142	0.139536	0.000917286
cg06702543	rs7918602:12948440:C:G	3222	60	76	0.368932	0.000485335	-0.318931	0.0884474	0.0405748
cg06702543	rs12266955	3861	21	24	0.116505	0.000153006	-0.501015	0.127328	0.0181448
cg06702543	rs12268570:12949367:G:A	4149	16	18	0.0873786	2.53028e-06	-0.695261	0.139352	0.00089714
cg06702543	rs12268676:12949508:G:A	4290	16	18	0.0873786	2.53028e-06	-0.695261	0.139352	0.00089714
cg06702543	rs7908635	4833	17	19	0.092233	2.56265e-06	-0.683402	0.137059	0.000904891
cg06702543	rs7915276:12950199:T:C	4981	22	25	0.121359	0.000151749	-0.496307	0.126058	0.0180375
cg06702543	rs7915496:12950338:T:C	5120	21	24	0.116505	0.000150823	-0.501677	0.127367	0.0179719
cg06702543	rs12220846:12950670:T:C	5452	21	24	0.116505	0.000150843	-0.501544	0.127335	0.0179733
cg06702543	rs12220856:12950764:T:C	5546	21	24	0.116505	0.000151856	-0.501562	0.127399	0.0180454
cg06702543	rs12220635:12951056:A:G	5838	22	25	0.121359	0.000195755	-0.48896	0.126472	0.0216147
cg06702543	rs7899716:12951508:G:T	6290	23	26	0.126214	0.000186073	-0.485813	0.125198	0.0208603
cg06702543	rs12243442:12951727:G:A	6509	18	20	0.0970874	3.99764e-06	-0.662999	0.135906	0.00125712
cg06702543	rs10906250:12952406:C:A	7188	18	20	0.0970874	4.10138e-06	-0.663016	0.136083	0.0012822
cg06702543	rs7909672:12953643:C:T	8425	16	18	0.0873786	1.87398e-06	-0.712247	0.140723	0.000723859
cg06702543	rs7898221:12953911:T:C	8693	18	21	0.101942	3.73514e-05	-0.568016	0.131654	0.00651291
cg06702543	rs56029744:12954662:G:T	9444	14	16	0.0776699	1.08862e-07	-0.808664	0.141363	9.07113e-05
cg06702543	rs7902554:12954895:T:G	9677	14	16	0.0776699	1.09271e-07	-0.808891	0.141424	9.09257e-05
cg06702543	rs57642391:12955215:G:A	9997	14	16	0.0776699	1.02581e-07	-0.81036	0.141329	8.69591e-05
cg04260608	rs74120710:12937634:C:T	-7996	17	19	0.092233	9.7376e-05	-0.371812	0.0916042	0.0131508
cg04260608	rs74120711:12937666:A:C	-7964	17	19	0.092233	0.000113329	-0.368461	0.0917135	0.0146455
cg04260608	rs74120712:12937708:C:T	-7922	17	19	0.092233	9.67525e-05	-0.372101	0.0916359	0.0130873
cg04260608	rs7096623:12943483:C:T	-2147	15	17	0.0825243	3.91907e-05	-0.398486	0.0926309	0.00674431
cg04260608	rs4237429:12944793:C:G	-837	19	21	0.101942	7.8525e-08	-0.473362	0.0817017	7.1414e-05
cg04260608	rs11369051:12944829:A:AC	-801	19	21	0.101942	7.84715e-08	-0.473393	0.081705	7.13803e-05
cg04260608	rs74120713:12944903:A:G	-727	14	16	0.0776699	3.53294e-06	-0.452603	0.0922085	0.0011469
cg04260608	rs2026307:12944980:C:A	-650	19	21	0.101942	7.79187e-08	-0.473133	0.0816377	7.09913e-05
cg04260608	rs1475611:12945203:T:C	-427	19	21	0.101942	7.79962e-08	-0.473305	0.0816705	7.10499e-05
cg04260608	rs7089884:12945455:A:T	-175	19	21	0.101942	7.42355e-08	-0.473761	0.0815937	6.87225e-05
cg04260608	rs11258054:12945591:C:A	-39	14	16	0.0776699	3.32363e-06	-0.453418	0.0920963	0.00109638
cg04260608	rs35280879:12945851:GA:G	221	19	21	0.101942	7.22363e-08	-0.473778	0.081511	6.73329e-05
cg04260608	rs11258056:12945966:C:T	336	19	21	0.101942	7.23426e-08	-0.473751	0.0815108	6.74116e-05
cg04260608	rs12259118:12946435:C:T	805	16	18	0.0873786	1.95253e-05	-0.404123	0.0901582	0.00406483
cg04260608	rs59486331:12947351:C:A	1721	16	18	0.0873786	1.93396e-05	-0.40387	0.0900527	0.00403845
cg04260608	rs1929382:12947858:C:T	2228	16	18	0.0873786	1.90596e-05	-0.40384	0.0899712	0.00399522
cg04260608	rs1929381:12947903:C:A	2273	16	18	0.0873786	1.90596e-05	-0.40384	0.0899712	0.00399522
cg04260608	rs2225465:12948067:C:G	2437	16	18	0.0873786	1.90335e-05	-0.403806	0.0899566	0.00399099
cg04260608	rs12266955	3449	21	24	0.116505	0.00029415	-0.303979	0.081042	0.0287478
cg04260608	rs12268570:12949367:G:A	3737	16	18	0.0873786	1.87775e-05	-0.40365	0.0898524	0.00395094
cg04260608	rs12268676:12949508:G:A	3878	16	18	0.0873786	1.87775e-05	-0.40365	0.0898524	0.00395094
cg04260608	rs7908635	4421	17	19	0.092233	1.32371e-05	-0.403473	0.0880709	0.0030531
cg04260608	rs7915276:12950199:T:C	4569	22	25	0.121359	0.000349358	-0.297484	0.0803686	0.0323542
cg04260608	rs7915496:12950338:T:C	4708	21	24	0.116505	0.000299354	-0.303756	0.0810912	0.0290941
cg04260608	rs12220846:12950670:T:C	5040	21	24	0.116505	0.00029184	-0.304196	0.0810512	0.0285926
cg04260608	rs12220856:12950764:T:C	5134	21	24	0.116505	0.000300527	-0.303734	0.0811094	0.0291632
cg04260608	rs12220635:12951056:A:G	5426	22	25	0.121359	0.000517635	-0.289592	0.0807351	0.0424125
cg04260608	rs7899716:12951508:G:T	5878	23	26	0.126214	0.000604162	-0.283563	0.0800742	0.0471854
cg04260608	rs12243442:12951727:G:A	6097	18	20	0.0970874	5.79135e-05	-0.37025	0.0881825	0.0089816
cg04260608	rs10906250:12952406:C:A	6776	18	20	0.0970874	5.92623e-05	-0.370183	0.0882954	0.0091339
cg04260608	rs7909672:12953643:C:T	8013	16	18	0.0873786	1.53427e-05	-0.412687	0.0908235	0.00341241
cg04260608	rs7898221:12953911:T:C	8281	18	21	0.101942	0.00027747	-0.319745	0.0848682	0.0276158
cg04260608	rs56029744:12954662:G:T	9032	14	16	0.0776699	3.34715e-06	-0.454821	0.0924135	0.00110214
cg04260608	rs7902554:12954895:T:G	9265	14	16	0.0776699	3.30748e-06	-0.455215	0.0924392	0.00109238
cg04260608	rs57642391:12955215:G:A	9585	14	16	0.0776699	3.04365e-06	-0.456689	0.0923604	0.00102691
cg05009817	rs7096623:12943483:C:T	-8526	15	17	0.0825243	3.00211e-06	-0.310216	0.0626956	0.00101799
cg05009817	rs2150661:12944156:C:G	-7853	63	77	0.373786	0.000112607	0.161813	0.0402593	0.0145807
cg05009817	rs4237429:12944793:C:G	-7216	19	21	0.101942	3.07085e-07	-0.314896	0.0574125	0.000192874
cg05009817	rs11369051:12944829:A:AC	-7180	19	21	0.101942	3.08423e-07	-0.314867	0.0574175	0.000193535
cg05009817	rs74120713:12944903:A:G	-7106	14	16	0.0776699	1.34911e-07	-0.351562	0.0619809	0.000106684
cg05009817	rs2026307:12944980:C:A	-7029	19	21	0.101942	3.00171e-07	-0.314904	0.0573592	0.000189873
cg05009817	rs1475611:12945203:T:C	-6806	19	21	0.101942	2.96787e-07	-0.315143	0.0573755	0.00018837
cg05009817	rs7089884:12945455:A:T	-6554	19	21	0.101942	2.92401e-07	-0.315147	0.0573406	0.000186569
cg05009817	rs11258054:12945591:C:A	-6418	14	16	0.0776699	1.30056e-07	-0.351727	0.0619197	0.000103738
cg05009817	rs35280879:12945851:GA:G	-6158	19	21	0.101942	2.84846e-07	-0.315175	0.0572831	0.000183021
cg05009817	rs11258056:12945966:C:T	-6043	19	21	0.101942	2.86645e-07	-0.315106	0.0572857	0.000183851
cg05009817	rs12259118:12946435:C:T	-5574	16	18	0.0873786	3.51484e-06	-0.302036	0.061518	0.00114227
cg05009817	rs12570009:12947039:G:C	-4970	54	67	0.325243	0.000431044	-0.145158	0.0398723	0.0374242
cg05009817	rs59486331:12947351:C:A	-4658	16	18	0.0873786	3.44607e-06	-0.301948	0.06144	0.00112572
cg05009817	rs1929382:12947858:C:T	-4151	16	18	0.0873786	3.37201e-06	-0.301978	0.0613801	0.00110747
cg05009817	rs1929381:12947903:C:A	-4106	16	18	0.0873786	3.37201e-06	-0.301978	0.0613801	0.00110747
cg05009817	rs2225465:12948067:C:G	-3942	16	18	0.0873786	3.3779e-06	-0.301912	0.061372	0.00110896
cg05009817	rs7918602:12948440:C:G	-3569	60	76	0.368932	0.000175562	-0.149785	0.0384399	0.0200025
cg05009817	rs12266955	-2930	21	24	0.116505	5.35183e-06	-0.260158	0.0541215	0.00156069
cg05009817	rs12268570:12949367:G:A	-2642	16	18	0.0873786	3.32063e-06	-0.301806	0.0612988	0.00109562
cg05009817	rs12268676:12949508:G:A	-2501	16	18	0.0873786	3.32063e-06	-0.301806	0.0612988	0.00109562
cg05009817	rs12263560:12949622:T:C	-2387	58	72	0.349515	0.000110617	-0.157525	0.039145	0.0143912
cg05009817	rs7908635	-1958	17	19	0.092233	8.45844e-06	-0.285476	0.0608222	0.00219573
cg05009817	rs7915276:12950199:T:C	-1810	22	25	0.121359	3.03243e-06	-0.263579	0.0532964	0.00102448
cg05009817	rs7915496:12950338:T:C	-1671	21	24	0.116505	5.37239e-06	-0.260232	0.0541475	0.001565
cg05009817	rs12220846:12950670:T:C	-1339	21	24	0.116505	5.20261e-06	-0.260513	0.054117	0.00152779
cg05009817	rs12220856:12950764:T:C	-1245	21	24	0.116505	5.33938e-06	-0.260348	0.0541544	0.00155815
cg05009817	rs12220635:12951056:A:G	-953	22	25	0.121359	1.23844e-05	-0.248586	0.0540636	0.00290467
cg05009817	rs7899716:12951508:G:T	-501	23	26	0.126214	6.58209e-06	-0.253126	0.0532235	0.00182502
cg05009817	rs12243442:12951727:G:A	-282	18	20	0.0970874	4.81467e-06	-0.288688	0.0597338	0.00144149
cg05009817	rs10906250:12952406:C:A	397	18	20	0.0970874	4.23229e-06	-0.290524	0.0597239	0.00131154
cg05009817	rs7909672:12953643:C:T	1634	16	18	0.0873786	2.01884e-06	-0.311617	0.0617858	0.000762405
cg05009817	rs7898221:12953911:T:C	1902	18	21	0.101942	5.89615e-05	-0.243296	0.0580118	0.00910048
cg05009817	rs56029744:12954662:G:T	2653	14	16	0.0776699	8.57409e-08	-0.357301	0.06188	7.6216e-05
cg05009817	rs7902554:12954895:T:G	2886	14	16	0.0776699	8.52424e-08	-0.357502	0.0619008	7.58754e-05
cg05009817	rs57642391:12955215:G:A	3206	14	16	0.0776699	8.0186e-08	-0.358117	0.0618607	7.25483e-05
cg05009817	rs11528649:12955811:C:A	3802	14	16	0.0776699	3.77284e-08	-0.371108	0.0623001	4.25952e-05
cg05009817	rs11528650:12956756:C:T	4747	14	16	0.0776699	1.46261e-08	-0.390028	0.0632678	2.25956e-05
cg14458563	rs61851363:13108432:C:T	-8266	23	27	0.131068	2.48637e-05	0.555357	0.125639	0.00485451
cg14458563	rs139870093:13114673:TTTTTC:T	-2025	26	30	0.145631	7.45713e-06	0.561691	0.118877	0.00200533
cg14458563	rs72478299:13114703:T:C	-1995	26	30	0.145631	7.44682e-06	0.561632	0.118856	0.00200348
cg14458563	rs370689313:13114863:C:T	-1835	26	30	0.145631	1.09543e-05	0.55432	0.119751	0.00265244
cg14458563	rs56170303:13115006:A:G	-1692	26	30	0.145631	7.10513e-06	0.562493	0.118746	0.00193402
cg14458563	rs56026821:13115221:C:G	-1477	26	30	0.145631	7.06591e-06	0.562571	0.118728	0.00192602
cg14458563	rs139769546:13115370:G:GAAAACAC	-1328	26	30	0.145631	7.06591e-06	0.562571	0.118728	0.00192602
cg14458563	rs55990072:13115414:A:C	-1284	26	30	0.145631	7.05906e-06	0.562402	0.118686	0.00192449
cg14458563	rs55642878:13115443:A:C	-1255	26	30	0.145631	7.05906e-06	0.562402	0.118686	0.00192449
cg14458563	rs55800322:13115473:A:G	-1225	26	30	0.145631	7.05906e-06	0.562402	0.118686	0.00192449
cg14458563	rs61851394:13115604:C:A	-1094	26	30	0.145631	7.05906e-06	0.562402	0.118686	0.00192449
cg14458563	rs61851395:13115776:G:C	-922	26	30	0.145631	6.98891e-06	0.560005	0.118119	0.00190949
cg14458563	rs72779542:13115802:A:T	-896	26	30	0.145631	6.98891e-06	0.560005	0.118119	0.00190949
cg14458563	rs4750306	-811	26	30	0.145631	6.98891e-06	0.560005	0.118119	0.00190949
cg14458563	rs4750308:13116699:C:A	1	34	39	0.18932	5.43328e-08	0.619026	0.105349	5.51545e-05
cg14458563	rs12416459:13116731:C:A	33	26	30	0.145631	7.94869e-06	0.560345	0.118992	0.00210237
cg14458563	rs61851396:13117093:G:A	395	26	30	0.145631	7.99936e-06	0.558684	0.118679	0.00211078
cg14458563	rs7098306:13117415:T:C	717	36	41	0.199029	1.66309e-07	0.589271	0.104764	0.000124084
cg14458563	rs34089311:13117447:GT:G	749	37	42	0.203883	2.88982e-07	0.579415	0.105372	0.000184984
cg14458563	rs7098634:13117693:T:C	995	36	41	0.199029	1.65396e-07	0.589272	0.104741	0.000123548
cg14458563	rs10796012:13117846:T:C	1148	36	41	0.199029	1.65396e-07	0.589272	0.104741	0.000123548
cg14458563	rs10796013:13118069:G:A	1371	36	41	0.199029	1.65396e-07	0.589272	0.104741	0.000123548
cg14458563	rs10796014:13118315:T:C	1617	36	41	0.199029	1.65396e-07	0.589272	0.104741	0.000123548
cg14458563	rs10752282:13118603:C:A	1905	36	41	0.199029	1.65396e-07	0.589272	0.104741	0.000123548
cg14458563	rs10752283:13118693:A:G	1995	36	41	0.199029	1.65396e-07	0.589272	0.104741	0.000123548
cg14458563	rs61851397:13118724:C:T	2026	26	30	0.145631	7.90458e-06	0.559025	0.118677	0.00209443
cg14458563	rs10796016:13118984:C:A	2286	36	41	0.199029	1.65824e-07	0.58916	0.104732	0.00012382
cg14458563	rs10906295:13119229:A:G	2531	36	41	0.199029	1.64929e-07	0.589158	0.104709	0.000123331
cg14458563	rs10906296:13119270:T:C	2572	36	41	0.199029	1.64532e-07	0.589099	0.104688	0.000123117
cg14458563	rs185000304:13119461:T:C	2763	36	41	0.199029	1.64929e-07	0.589158	0.104709	0.000123331
cg14458563	rs139330109:13119471:G:A	2773	36	41	0.199029	1.64929e-07	0.589158	0.104709	0.000123331
cg14458563	rs143694936:13119801:G:A	3103	36	41	0.199029	1.58169e-07	0.590183	0.104714	0.000119658
cg14458563	rs77538812:13119825:G:C	3127	36	41	0.199029	1.58169e-07	0.590183	0.104714	0.000119658
cg14458563	rs4582866:13120826:C:T	4128	36	41	0.199029	1.64493e-07	0.589038	0.104676	0.000123103
cg14458563	rs4282892:13120858:C:T	4160	36	41	0.199029	1.64493e-07	0.589038	0.104676	0.000123103
cg14458563	rs7083284:13121188:T:A	4490	36	41	0.199029	1.64493e-07	0.589038	0.104676	0.000123103
cg14458563	rs7079763:13121270:A:G	4572	36	41	0.199029	1.64493e-07	0.589038	0.104676	0.000123103
cg14458563	rs7079869	4654	36	41	0.199029	1.64493e-07	0.589038	0.104676	0.000123103
cg14458563	rs36060567:13121450:CA:C	4752	36	41	0.199029	1.64831e-07	0.590191	0.10489	0.000123284
cg14458563	rs17152817:13121925:G:A	5227	25	29	0.140777	1.02016e-05	0.569602	0.12258	0.00252411
cg14458563	rs7088658:13122538:T:C	5840	23	27	0.131068	0.000318091	0.472624	0.126761	0.0303348
cg14458563	rs570158:13122809:T:C	6111	31	35	0.169903	3.09381e-05	0.511249	0.117161	0.00567956
cg14458563	rs4748019:13123650:C:T	6952	33	38	0.184466	1.24837e-05	0.510861	0.111153	0.00292237
cg14458563	rs12571458:13125058:T:G	8360	23	27	0.131068	0.00039161	0.465716	0.126951	0.0350529
cg14458563	rs7099921:13126019:A:G	9321	22	26	0.126214	0.000425755	0.475503	0.130483	0.0371074
cg26011212	rs11814554	-3718	22	24	0.116505	8.71049e-05	-0.232086	0.0567568	0.0121129
cg26011212	rs11813296:13255838:T:C	-3393	27	30	0.145631	0.000377223	-0.192035	0.0521931	0.0341703
cg26011212	rs7079537:13257060:A:G	-2171	27	30	0.145631	0.000432192	-0.191118	0.0525079	0.0374921
cg26011212	rs12266563:13261877:C:T	2646	23	25	0.121359	0.000356881	-0.214341	0.0580031	0.0328384
cg26011212	rs36009252:13261884:GAAAACCCTGAAGT:G	2653	24	27	0.131068	0.000169534	-0.211274	0.0540847	0.0195015
cg20227161	rs141465924:13258750:T:TCTC	-8246	69	86	0.417476	0.000111273	0.0951485	0.0236539	0.0144534
cg20227161	rs7916990:13261990:G:A	-5006	70	87	0.42233	0.00011554	0.0944544	0.0235416	0.0148504
cg20227161	rs1408363	-4853	69	86	0.417476	0.000171927	0.0914879	0.0234438	0.0197044
cg26654766	rs10612459:13337831:CAAA:C	-5777	72	101	0.490291	0.000273971	-0.0965003	0.025589	0.0273753
cg26654766	rs504044:13338067:T:C	-5541	72	101	0.490291	0.000282264	-0.0957641	0.0254512	0.0279475
cg26654766	rs505081	-5406	72	101	0.490291	0.000270155	-0.0958786	0.0253973	0.0271066
cg26654766	rs2484527:13338301:G:A	-5307	72	101	0.490291	0.000268187	-0.0960348	0.0254246	0.0269709
cg26654766	rs189379749:13340896:G:A	-2712	42	51	0.247573	8.31728e-05	0.120935	0.0294848	0.0117198
cg26654766	rs732701:13341731:A:G	-1877	42	50	0.242718	6.01268e-05	0.125805	0.0300344	0.00923382
cg26654766	rs732704:13341889:C:G	-1719	42	50	0.242718	5.9209e-05	0.125913	0.0300309	0.00912778
cg26654766	rs4615920	-954	42	50	0.242718	5.78273e-05	0.126004	0.0300075	0.00897274
cg26654766	rs7914269:13343488:C:A	-120	41	47	0.228155	0.000261395	0.121985	0.0322327	0.0265164
cg26654766	rs6602647:13343521:A:C	-87	42	51	0.247573	4.25192e-05	0.125528	0.0293258	0.007159
cg26654766	rs3758423:13344169:G:A	561	62	80	0.38835	0.000209071	0.103362	0.0268636	0.0226371
cg26654766	rs7904040:13344886:A:G	1278	62	81	0.393204	0.000158394	0.10395	0.0264823	0.0186112
cg26654766	rs34734926:13346434:G:A	2826	41	45	0.218447	0.000430876	0.124914	0.0343106	0.0374132
cg26654766	rs35188183:13347099:G:A	3491	40	46	0.223301	0.000149614	0.126863	0.0321901	0.017867
cg26654766	rs34922519:13347491:G:T	3883	40	46	0.223301	0.000148692	0.126795	0.0321588	0.0177906
cg26654766	rs10906345:13347742:T:C	4134	45	57	0.276699	4.48634e-05	0.119439	0.0279957	0.00745758
cg18930878	rs732701:13341731:A:G	-2738	42	50	0.242718	0.000508941	-0.118032	0.0328603	0.0419216
cg18930878	rs732704:13341889:C:G	-2580	42	50	0.242718	0.00050498	-0.118102	0.0328588	0.0416966
cg18930878	rs4615920	-1815	42	50	0.242718	0.000493551	-0.118232	0.0328335	0.0410473
cg18930878	rs34734926:13346434:G:A	1965	41	45	0.218447	0.000202265	-0.140926	0.0365379	0.0221017
cg18930878	rs35188183:13347099:G:A	2630	40	46	0.223301	0.000265062	-0.131213	0.0347072	0.0267646
cg18930878	rs34922519:13347491:G:T	3022	40	46	0.223301	0.000262364	-0.131181	0.0346722	0.0265834
cg18930878	rs10906345:13347742:T:C	3273	45	57	0.276699	0.000533192	-0.10995	0.0307277	0.0433186
cg20739919	rs4748033:13480317:C:G	-452	52	63	0.305825	0.000311401	0.100759	0.0269802	0.0298949
cg20739919	rs4750356	20	52	63	0.305825	0.000309685	0.100758	0.0269685	0.0297804
cg20739919	rs12415754:13481427:T:A	658	51	62	0.300971	0.000467318	0.0978227	0.0270455	0.0395369
cg20739919	rs11258383:13481753:C:G	984	54	65	0.315534	0.000163844	0.106304	0.0271471	0.0190361
cg20739919	rs11258384:13482031:T:C	1262	54	65	0.315534	0.00016231	0.106391	0.0271512	0.0189133
cg20739919	rs11258385:13482073:C:T	1304	54	65	0.315534	0.000161557	0.106434	0.0271531	0.0188554
cg20739919	rs1890876:13482731:G:A	1962	54	64	0.31068	0.00035801	0.103098	0.0279063	0.0329095
cg20739919	rs4750358:13485445:C:T	4676	54	64	0.31068	0.000363972	0.103469	0.028043	0.0333052
cg20739919	rs35375308:13488787:C:A	8018	21	21	0.101942	0.000450476	-0.169338	0.0466792	0.0385608
cg20739919	rs10430801:13490742:G:A	9973	55	65	0.315534	0.000316437	0.104055	0.0278971	0.0302217
cg11078826	rs1105233:13488453:A:G	-6324	23	25	0.121359	0.000202587	0.293844	0.0761939	0.0221253
cg11078826	rs35375308:13488787:C:A	-5990	21	21	0.101942	0.000288038	0.335234	0.0892321	0.0283354
cg11078826	rs36095818:13501289:G:T	6512	21	21	0.101942	0.000363745	0.329575	0.0893197	0.0332881
cg21502453	rs3832669:13494396:TAA:T	-1706	55	66	0.320388	0.00049367	0.116742	0.0324203	0.0410545
cg21502453	rs2277222:13494594:T:C	-1508	55	66	0.320388	0.000482537	0.116979	0.0324259	0.0404271
cg21502453	rs7071421:13494787:C:T	-1315	55	66	0.320388	0.000493344	0.116814	0.0324386	0.041033
cg21502453	rs7089073:13494876:A:G	-1226	55	66	0.320388	0.000485661	0.116917	0.0324258	0.0405919
cg21502453	rs7092928:13495043:T:C	-1059	55	66	0.320388	0.000485661	0.116917	0.0324258	0.0405919
cg21502453	rs7092750:13495104:A:G	-998	55	66	0.320388	0.000485661	0.116917	0.0324258	0.0405919
cg21502453	rs7075255:13495176:C:T	-926	55	66	0.320388	0.000493344	0.116814	0.0324386	0.041033
cg21502453	rs7096540:13495241:T:C	-861	55	66	0.320388	0.00048486	0.116922	0.0324227	0.0405501
cg21502453	rs7092954:13495287:A:G	-815	55	66	0.320388	0.000485661	0.116917	0.0324258	0.0405919
cg21502453	rs7075673:13495447:C:T	-655	55	66	0.320388	0.000479985	0.11738	0.0325231	0.0402732
cg21502453	rs11258393:13495589:A:G	-513	55	66	0.320388	0.000477035	0.117274	0.0324775	0.0401062
cg21502453	rs4748034:13496208:T:C	106	55	66	0.320388	0.000488708	0.117023	0.0324717	0.0407737
cg21502453	rs4750360:13496244:C:A	142	55	66	0.320388	0.000471718	0.117389	0.0324797	0.0397879
cg21502453	rs11258395:13498002:G:A	1900	55	66	0.320388	0.00046057	0.11781	0.0325332	0.0391372
cg21502453	rs10906374:13498266:T:C	2164	55	66	0.320388	0.000456897	0.118139	0.032603	0.0389363
cg21502453	rs10796081:13498418:A:G	2316	55	66	0.320388	0.000456897	0.118139	0.032603	0.0389363
cg21502453	rs10906377:13499395:T:C	3293	55	66	0.320388	0.000451659	0.118264	0.0326071	0.0386282
cg19695507	rs10906386:13520163:C:T	-6031	66	85	0.412621	0.000586804	-0.236527	0.0666291	0.046252
cg19695507	rs10906390:13523864:G:A	-2330	65	84	0.407767	0.00061126	-0.234547	0.0662978	0.047567
cg19695507	rs4748040	-194	64	77	0.373786	0.000391029	-0.25995	0.0708524	0.0350142
cg19695507	rs36022989:13527689:T:C	1495	64	81	0.393204	0.000181403	-0.257429	0.0662203	0.0204895
cg19695507	rs1538791:13529240:T:A	3046	64	76	0.368932	0.000624558	-0.255789	0.072433	0.0482909
cg19695507	rs2399971	3168	64	80	0.38835	0.000325765	-0.25128	0.0675192	0.030851
cg24867665	rs11258420:13536111:T:C	-9984	44	51	0.247573	0.000146822	-0.126335	0.0320137	0.0176317
cg24867665	rs17153371:13539623:G:C	-6472	42	49	0.237864	0.000332756	-0.120261	0.0323673	0.031286
cg24867665	rs11594028:13539835:T:C	-6260	43	50	0.242718	0.000203706	-0.123822	0.0321199	0.0222111
cg24867665	rs11594060:13540055:T:C	-6040	43	50	0.242718	0.000203706	-0.123822	0.0321199	0.0222111
cg24867665	rs10906394:13540358:C:T	-5737	43	50	0.242718	0.000203706	-0.123822	0.0321199	0.0222111
cg24867665	rs4750370:13541274:T:C	-4821	43	50	0.242718	0.000204536	-0.123805	0.032125	0.0222759
cg24867665	rs4748041:13544585:A:G	-1510	43	49	0.237864	0.000602196	-0.118646	0.0334948	0.0470878
cg24867665	rs3829928:13544786:T:C	-1309	43	49	0.237864	0.000617551	-0.118723	0.0335874	0.0479134
cg24867665	rs3814659:13544864:G:A	-1231	43	49	0.237864	0.000604583	-0.118626	0.0335002	0.0472097
cg24867665	rs3814660:13545130:A:C	-965	43	49	0.237864	0.000601314	-0.118721	0.0335119	0.0470388
cg24867665	rs7096196:13545584:G:A	-511	59	76	0.368932	2.02167e-05	0.121361	0.0271291	0.00417056
cg24867665	rs1890877:13546074:G:A	-21	58	72	0.349515	9.03584e-06	0.132644	0.0283601	0.0023071
cg24867665	rs61833902:13547405:C:T	1310	44	51	0.247573	0.00014601	-0.12734	0.0322559	0.017562
cg24867665	rs34623802:13547507:C:T	1412	44	51	0.247573	0.00014601	-0.12734	0.0322559	0.017562
cg24867665	rs6602662:13547709:A:G	1614	58	72	0.349515	9.07995e-06	0.13264	0.0283665	0.0023156
cg24867665	rs7906371:13547964:C:A	1869	44	52	0.252427	0.000112307	-0.127125	0.0316231	0.0145514
cg24867665	rs1556991:13548332:C:T	2237	44	52	0.252427	0.000112811	-0.127104	0.0316275	0.0146006
cg24867665	rs11597677:13548360:G:A	2265	44	51	0.247573	0.000147666	-0.12725	0.0322585	0.017704
cg24867665	rs7073791:13548827:T:G	2732	43	51	0.247573	0.000169236	-0.124072	0.0317577	0.0194761
cg24867665	rs6602663:13549280:C:T	3185	43	51	0.247573	0.000169236	-0.124072	0.0317577	0.0194761
cg24867665	rs1890878:13549825:C:T	3730	43	50	0.242718	0.000224294	-0.123997	0.0323931	0.0238079
cg24867665	rs1890879:13549927:C:G	3832	43	50	0.242718	0.00022308	-0.124033	0.0323894	0.0237174
cg24867665	rs11598301:13552627:A:T	6532	43	50	0.242718	0.000219904	-0.124214	0.0324027	0.023473
cg17624339	rs9787567:13707100:G:C	-4250	57	67	0.325243	8.79809e-06	0.207643	0.0443321	0.00226382
cg17624339	rs7906964	-2468	74	90	0.436893	0.000381745	-0.168658	0.0458824	0.0344545
cg17624339	rs10796110	-1924	57	67	0.325243	9.30158e-06	0.206764	0.0442759	0.00235627
cg17624339	rs7093256:13710836:C:T	-514	60	71	0.34466	9.405e-06	0.206501	0.0442457	0.00237529
cg17624339	rs7093277:13710897:C:T	-453	60	71	0.34466	9.37601e-06	0.206514	0.0442413	0.00236964
cg17624339	rs10752317:13711361:C:T	11	56	66	0.320388	2.48356e-05	0.19822	0.0448407	0.00485175
cg17624339	rs10796111:13711380:T:C	30	56	66	0.320388	2.50473e-05	0.198061	0.0448268	0.00488135
cg17624339	rs10906445:13712038:C:T	688	70	86	0.417476	0.000345366	-0.16724	0.0451415	0.0321048
cg17624339	rs7091018:13713726:A:G	2376	75	93	0.451456	0.00060239	-0.162114	0.0457676	0.0470968
cg05263011	rs12415988:13750812:C:T	-1574	38	42	0.203883	9.06809e-05	0.191171	0.0468759	0.0124705
cg05263011	rs2296599	-5	40	44	0.213592	8.21313e-05	0.185778	0.0452562	0.0116114
cg05374741	rs1571008:13760776:T:C	-9268	62	76	0.368932	0.000282873	-0.121719	0.0323546	0.0279877
cg05374741	rs10796116:13762786:A:G	-7258	63	79	0.383495	0.000169139	-0.122607	0.0313813	0.0194683
cg05374741	rs12359348	-4094	63	79	0.383495	0.000125788	-0.12395	0.0310736	0.015776
cg05374741	rs35537139:13768894:G:A	-1150	54	65	0.315534	1.69601e-05	-0.145717	0.0322501	0.00366865
cg05374741	rs35567671:13769722:C:A	-322	54	65	0.315534	1.73001e-05	-0.145791	0.0323027	0.0037246
cg05374741	rs11258560:13770137:A:G	93	54	65	0.315534	1.77147e-05	-0.145624	0.0323089	0.00378804
cg23584734	rs12218115	2530	44	51	0.247573	0.000304135	-0.139394	0.0372578	0.0294114
cg09923296	rs12569860:13819110:C:G	6944	55	68	0.330097	0.000556857	-0.206994	0.0580563	0.0446287
cg09923296	rs10796121:13820866:G:C	8700	55	64	0.31068	0.000489233	-0.22417	0.0622084	0.0408032
cg09923296	rs10796122:13820961:T:C	8795	55	64	0.31068	0.000482726	-0.22439	0.0622016	0.0404384
cg26708920	rs10796121:13820866:G:C	-5452	55	64	0.31068	2.65387e-05	0.320777	0.0728474	0.0050914
cg26708920	rs10796122:13820961:T:C	-5357	55	64	0.31068	2.61336e-05	0.321025	0.0728379	0.00503451
cg26708920	rs8181376:13821849:C:T	-4469	60	69	0.334951	1.2305e-07	0.399761	0.0702212	9.92811e-05
cg26708920	rs2400015	-4365	57	68	0.330097	5.27004e-06	0.331551	0.0689193	0.00154199
cg26708920	rs1105872:13821981:C:A	-4337	57	68	0.330097	5.75116e-06	0.330989	0.0691113	0.00165041
cg26708920	rs11258605:13822397:G:A	-3921	57	65	0.315534	0.000160423	0.298812	0.0761944	0.018772
cg26708920	rs2400017:13822455:A:G	-3863	57	68	0.330097	5.649e-06	0.331488	0.0691517	0.00162678
cg26708920	rs1104866:13822571:C:T	-3747	57	68	0.330097	5.53943e-06	0.331766	0.0691402	0.00160152
cg26708920	rs11258607:13823198:G:T	-3120	54	61	0.296117	4.97153e-05	0.323608	0.0763372	0.00802546
cg26708920	rs1919457:13826018:A:C	-300	54	64	0.31068	5.01338e-06	0.340095	0.0705156	0.00148604
cg26708920	rs10796127	-76	64	73	0.354369	8.17774e-08	0.410597	0.0709799	7.36267e-05
cg26708920	rs3995593:13826399:G:A	81	56	66	0.320388	9.96776e-06	0.330593	0.0710556	0.00247976
cg15642182	rs10906502:13869900:T:C	-4072	48	53	0.257282	0.000603822	-0.10736	0.0303154	0.0471721
cg15642182	rs10906503	-3985	49	54	0.262136	0.00043588	-0.109689	0.0301567	0.0377163
cg15642182	rs4750423:13870181:G:A	-3791	49	55	0.26699	0.000357942	0.109438	0.0296221	0.0329053
cg15642182	rs4750424:13870390:G:A	-3582	49	55	0.26699	0.000359428	0.1095	0.0296483	0.0330049
cg15642182	rs4750425:13870397:G:A	-3575	49	55	0.26699	0.000359428	0.1095	0.0296483	0.0330049
cg15642182	rs4750426:13870445:C:T	-3527	49	55	0.26699	0.000359428	0.1095	0.0296483	0.0330049
cg15642182	rs4750427:13870514:T:C	-3458	49	55	0.26699	0.000359428	0.1095	0.0296483	0.0330049
cg15642182	rs11258659:13870747:C:G	-3225	49	55	0.26699	0.000341501	0.110029	0.0296731	0.0318506
cg15642182	rs7899777:13875590:A:G	1618	25	26	0.126214	0.000561076	-0.139962	0.0392801	0.0448751
cg12515015	rs10906511:13883636:A:C	1815	56	69	0.334951	0.000623324	-0.0781642	0.0221305	0.048226
cg12515015	rs7070823:13883882:C:A	2061	56	69	0.334951	0.000629896	-0.0780786	0.0221258	0.0485804
cg12515015	rs7088464:13883951:A:G	2130	56	69	0.334951	0.000629896	-0.0780786	0.0221258	0.0485804
cg12515015	rs7070970:13883972:C:T	2151	56	69	0.334951	0.000633427	-0.078041	0.0221256	0.0487638
cg12515015	rs7070089:13884083:G:A	2262	56	69	0.334951	0.000637711	-0.0779918	0.0221242	0.0489781
cg12515015	rs7073646	2438	55	68	0.330097	0.000375761	-0.0797535	0.0216696	0.0340833
cg12515015	rs4083258:13884752:G:A	2931	56	69	0.334951	0.000633637	-0.0780326	0.0221238	0.0487736
cg12515015	rs10906512:13884806:G:A	2985	56	69	0.334951	0.000633637	-0.0780326	0.0221238	0.0487736
cg12515015	rs10906513:13886105:G:A	4284	49	59	0.286408	0.000264013	-0.0867856	0.0229489	0.026691
cg12515015	rs10906514:13886157:G:A	4336	49	60	0.291262	0.000156919	-0.0879186	0.0223834	0.0184872
cg07629776	rs2178285:13966921:A:G	-5290	64	82	0.398058	3.95489e-06	0.806345	0.165201	0.00124743
cg07629776	rs2178286:13966936:C:A	-5275	64	82	0.398058	4.27228e-06	0.807304	0.166038	0.0013208
cg07629776	rs2797860:13967167:C:G	-5044	65	83	0.402913	7.27673e-06	-0.790907	0.167174	0.00196786
cg07629776	rs1970578:13967828:C:A	-4383	71	91	0.441748	9.5101e-06	-0.789277	0.169214	0.00239553
cg07629776	rs1539502:13968032:G:A	-4179	54	64	0.31068	2.92332e-06	-0.885873	0.178805	0.000999321
cg07629776	rs1343005	-4025	65	83	0.402913	4.58158e-06	-0.800168	0.165151	0.00138923
cg07629776	rs2610795:13974383:A:G	2172	46	54	0.262136	0.000640017	0.683731	0.194015	0.0490971
cg07629776	rs2797891:13974452:T:G	2241	46	54	0.262136	0.000640017	0.683731	0.194015	0.0490971
cg26756800	rs4237438:14018768:A:C	-8250	59	72	0.349515	0.000381345	0.186875	0.050834	0.0344281
cg26756800	rs4748065:14019876:G:T	-7142	58	71	0.34466	0.000647675	0.179189	0.0508979	0.0495061
cg26756800	rs34792895:14021696:CAT:C	-5322	58	70	0.339806	0.000441083	0.189393	0.0521189	0.0380218
cg26756800	rs35982189:14029875:T:C	2857	53	62	0.300971	1.2007e-05	0.245712	0.0533479	0.00283596
cg07698834	rs4750441:14019728:A:T	-9889	59	72	0.349515	2.10485e-05	-0.374813	0.0839799	0.00429735
cg07698834	rs4750442:14019827:A:G	-9790	60	73	0.354369	3.32954e-05	-0.36932	0.0850084	0.00598783
cg07698834	rs4750443:14019865:A:T	-9752	59	72	0.349515	2.07634e-05	-0.375172	0.0839945	0.00425457
cg07698834	rs4748065:14019876:G:T	-9741	58	71	0.34466	3.15177e-05	-0.366088	0.0839882	0.00575542
cg07698834	rs1031753:14020110:T:C	-9507	59	72	0.349515	2.01582e-05	-0.375952	0.0840265	0.00416188
cg07698834	rs12779988:14020404:T:A	-9213	58	71	0.34466	7.11523e-06	-0.392691	0.0829055	0.00193611
cg07698834	rs34792895:14021696:CAT:C	-7921	58	70	0.339806	4.04847e-06	-0.412666	0.0846442	0.00126959
cg07698834	rs4750444:14029068:C:T	-549	59	71	0.34466	1.98264e-06	-0.41968	0.0831405	0.000753321
cg07698834	rs4748066:14029313:T:A	-304	59	71	0.34466	1.93409e-06	-0.419327	0.0829731	0.000740036
cg07698834	rs7917296:14029639:G:A	22	57	69	0.334951	9.40041e-07	-0.426945	0.0817132	0.000435588
cg07698834	rs7917314:14029682:G:A	65	59	72	0.349515	1.91934e-06	-0.418176	0.0827152	0.000736103
cg07698834	rs11258774	84	59	72	0.349515	1.06414e-06	-0.422544	0.0813255	0.000476464
cg07698834	rs11258775:14029742:T:C	125	59	72	0.349515	1.91293e-06	-0.418236	0.0827141	0.00073435
cg07698834	rs35982189:14029875:T:C	258	53	62	0.300971	4.45825e-06	-0.435244	0.0897089	0.00136219
[truncated: 281,475+ more rows]
