# Supplementary material for: Multi-omics colocalization with genome-wide association studies reveals a context-specific genetic mechanism at a childhood onset asthma risk locus
Source: Genome Med. 2021 Oct 10;13:157. doi: 10.1186/s13073-021-00967-y (PMC8504130; doi:10.1186/s13073-021-00967-y)
Supplement: Supplementary file 12 — Additional file 12:. eQTL mash results (lfsr< 0.05). [file 13073_2021_967_MOESM12_ESM.xlsx]

## Sheet: Legend for Additional File 12
Additional File 12 eQTL mash results (lfsr<0.05)

## Sheet: Additional File 12
eqtl	rv.eqtl.lfsr	veh.eqtl.lfsr
ENSG00000001460_rs10903086	0.0144784	0.0326104
ENSG00000003400_rs11674246:202048123:C:T	6.96789e-08	0.000559515
ENSG00000006282_rs9890200:48624523:A:C	0.000812783	0.00384956
ENSG00000006453_rs36085425:97959025:T:TAA	0.000254001	0.0241472
ENSG00000006744_rs55767521:11959643:C:CT	0.0359286	0.326094
ENSG00000009335_rs2159730:157213396:C:T	0.0202251	0.454752
ENSG00000009790_rs141112353:209960086:TA:T	0.0126361	0.584941
ENSG00000009830_rs77071473:77748361:A:G	0.0327146	0.107047
ENSG00000011105_rs10848784	0.0337098	0.469848
ENSG00000011376_rs17077990:45581959:C:G	0.000165379	0.000246322
ENSG00000011523_rs3052194:65308573:A:AAGC	5.48968e-05	0.119137
ENSG00000021826_rs6727682:211339162:C:A	0.00224903	0.0688808
ENSG00000023287_rs11784703:54413417:G:A	0.0334737	0.598363
ENSG00000023909_rs41303970:94375309:G:A	0.00832875	0.869511
ENSG00000025772_rs2903772:43622103:T:G	0.00363409	0.873777
ENSG00000027001_rs753953:24294158:C:T	0.0411918	0.210081
ENSG00000031691_rs498792:49342165:A:G	1.335e-06	0.0515334
ENSG00000033178_rs10866199:68485590:C:A	4.1412e-07	5.07391e-05
ENSG00000035115_rs62114538:256116:G:T	7.56542e-07	1.86573e-08
ENSG00000036054_rs17279521:99938137:A:G	8.54561e-05	3.29971e-07
ENSG00000037474_rs4701742:6613827:T:C	0.00179491	0.022423
ENSG00000037749_rs17503043:152584121:T:C	0.0494665	0.52194
ENSG00000037757_rs1473197:13870400:C:G	1.47897e-07	8.99884e-08
ENSG00000039068_rs4783561:68491991:G:A	0.0233962	0.105344
ENSG00000040531_rs9904721:3544653:C:T	0.00266537	0.309356
ENSG00000047188_rs67764628:112745067:T:A	0.0347532	0.638393
ENSG00000049239_rs11121349:9295794:G:C	0.00437198	1.95376e-06
ENSG00000049449_rs223046:32112568:A:C	0.000775599	0.000199553
ENSG00000051523_rs4419048:88625552:C:T	0.0494309	0.856755
ENSG00000051620_rs4896349:138711311:T:A	8.81348e-05	0.302752
ENSG00000054118_rs79030411:37510951:G:A	9.73021e-05	0.854807
ENSG00000058063_rs35665738:182579731:C:CAA	0.00111254	2.05044e-05
ENSG00000058262_rs2594221:127194344:A:C	0.00566939	0.869009
ENSG00000059122_rs7193057:2931176:C:T	0.0124954	0.182067
ENSG00000060558_rs399204:3136962:A:G	0.00442798	0.353547
ENSG00000060762_rs12190218:166585070:T:C	0.00507119	0.105368
ENSG00000062370_rs2571101:44843754:G:A	0.00215663	0.320875
ENSG00000063761_rs8018813:78055398:G:A	0.0349756	0.0242089
ENSG00000064270_rs111362340:84403750:A:ATTCC	0.00197124	0.0426658
ENSG00000064419_rs7801252:129389913:G:C	0.0334762	0.405691
ENSG00000064651_rs115521027:127892777:G:A	0.000815791	0.852681
ENSG00000065268_rs2301811:984578:T:G	1.03755e-10	4.29434e-12
ENSG00000065457_rs60988480:75661084:G:T	0.00110108	0.0284718
ENSG00000067596_rs9899889:41823225:T:G	0.0466128	0.277436
ENSG00000068097_rs141913094:58176651:C:CT	4.71752e-07	0.0457529
ENSG00000068912_rs148474388:54366077:C:CCA	0.022578	0.616632
ENSG00000069188_rs323385:71674455:A:G	0.0348859	0.454277
ENSG00000070526_rs16969138:74635114:T:C	0.00362651	0.0933754
ENSG00000070610_rs3750434:35739876:G:A	0.00354549	0.322749
ENSG00000070718_rs1050262	9.24297e-09	9.48935e-07
ENSG00000071894_rs7838766:145586771:A:G	5.85788e-05	5.23981e-05
ENSG00000071967_rs3731976:172378893:G:A	0.000796216	0.882035
ENSG00000072071_rs34434835:14461302:C:CAA	0.0447887	0.332827
ENSG00000072310_rs9891340:17543846:T:C	0.0380213	0.302326
ENSG00000073417_rs7181604:85946265:C:T	0.00730928	0.650073
ENSG00000073578_rs2175963:333827:A:C	0.0113331	0.00391995
ENSG00000074201_11:77448536:A:AAC	0.0468322	0.232488
ENSG00000074319_rs200897854:18581689:G:C	0.0103004	0.49438
ENSG00000074621_rs6494533:65977891:C:T	0.0257446	0.270351
ENSG00000075407_rs66842526:38383280:CT:C	0.000446603	0.118215
ENSG00000077380_rs12052246:172895606:C:A	6.77615e-08	0.000314039
ENSG00000077782_rs12544187:38324426:C:A	0.0420402	0.0061807
ENSG00000079332_rs1046747:71910630:G:A	0.00082878	0.00131887
ENSG00000079785_rs4668938:15748960:T:G	0.010035	0.34905
ENSG00000080822_rs1492033:97779120:T:C	0.00356908	0.132062
ENSG00000082781_rs7430164:124607760:G:A	0.0108083	0.575118
ENSG00000083799_rs4785451:50808302:G:A	0.0432925	0.629475
ENSG00000083937_rs1826637:87371474:G:A	0.0102145	0.00358069
ENSG00000084072_rs12074147:40203722:T:C	0.0123861	0.756266
ENSG00000084073_rs10661733:40720469:T:TTTTCC	0.0360556	0.26468
ENSG00000084207_rs7941648	0.00112285	0.514977
ENSG00000085721_rs12928424:15150773:C:G	0.00197646	0.4311
ENSG00000086200_rs10079618:61926522:A:T	0.0171128	0.183385
ENSG00000086232_rs1133132:6061915:T:C	0.00301406	0.00441032
ENSG00000086619_rs12126011:236477882:A:G	0.0379012	0.131685
ENSG00000087191_rs367631354:61806301:CATT:C	0.00137786	0.0146323
ENSG00000087299_rs7158964:50776241:C:T	0.0251951	0.000123096
ENSG00000087338_rs1056482:70108256:T:A	0.00744475	0.000209158
ENSG00000087494_rs7297051:28174817:C:T	5.84086e-06	0.000660154
ENSG00000087502_rs7136223:29437861:A:G	1.595e-06	1.29762e-05
ENSG00000087510_rs6014820	5.51022e-06	0.000783569
ENSG00000088986_rs1520759:120015114:G:A	0.0458383	0.843482
ENSG00000089335_rs8112651:35135509:T:G	0.0316718	0.914123
ENSG00000090266_rs76499730:140450945:G:A	0.00123401	0.0427587
ENSG00000090432_rs12726785:20783398:A:C	0.02385	0.677825
ENSG00000090487_rs8023387:65289246:T:C	2.13957e-08	0.000320059
ENSG00000090530_rs34440282:189864814:T:C	0.0015333	0.010674
ENSG00000090621_rs3768321:40035928:G:T	0.000120153	0.258199
ENSG00000091073_rs17855260:76132898:T:C	0.0480177	0.00830715
ENSG00000091592_rs56750129:5421005:T:A	0.018548	0.0226155
ENSG00000091640_rs4790716:4865928:G:A	0.000112852	0.00903731
ENSG00000092094_rs3120068:20919551:C:T	7.08943e-09	0.169249
ENSG00000095209_rs2271247:108456888:A:C	2.5901e-05	0.103278
ENSG00000095319_rs1129098:131771505:C:T	0.000974297	0.160228
ENSG00000095321_rs71497442:131908029:TCTGGGCCATGG:T	0.00354129	0.333127
ENSG00000095380_rs12338164:100802962:C:T	0.0318278	0.749063
ENSG00000096433_rs942641:33687007:G:A	0.00903962	0.534739
ENSG00000097007_rs2855190:133708361:T:C	0.00187775	0.00207494
ENSG00000099260_rs34852112:100074272:G:A	0.0158034	0.740748
ENSG00000099817_rs12972250:329746:G:A	0.0174196	0.661827
ENSG00000099956_rs34153752:24157624:A:G	0.00141767	0.022307
ENSG00000100058_rs760555:25872837:G:A	0.0189877	0.823452
ENSG00000100075_rs712948:19206499:A:G	0.0024007	0.00280929
ENSG00000100077_rs476416:25906860:G:C	0.0448959	0.734602
ENSG00000100106_rs1074407:38156183:T:A	0.00158255	7.92241e-10
ENSG00000100116_rs6000889:38184851:C:T	0.0453662	0.0101444
ENSG00000100294_rs2267449:43018085:G:A	0.00165226	0.651677
ENSG00000100304_rs4822262:43577214:C:T	0.00952672	0.0146155
ENSG00000100418_rs7291189:41210831:T:G	0.0173179	0.2333
ENSG00000100439_rs8011143:23067931:C:T	0.0169772	0.135435
ENSG00000100441_rs4982912:24903284:A:G	0.0243789	0.821737
ENSG00000100503_rs1042266:51372103:C:G	7.02536e-06	1.00624e-05
ENSG00000100504_rs1042266:51372103:C:G	0.000157796	0.000291234
ENSG00000100577_rs7160188:77786361:G:C	0.035541	0.0113217
ENSG00000100647_rs61703713:70136424:CT:C	0.00221819	0.230959
ENSG00000100744_rs17094001:96759056:G:A	0.0147576	0.0191472
ENSG00000100908_rs927494:24600390:T:A	0.00153019	0.000662416
ENSG00000100949_rs1957764	0.0412024	0.664499
ENSG00000101158_rs6070694:57591126:G:A	0.00350247	0.0359958
ENSG00000101193_rs11907898:61359803:C:A	0.0156863	0.209385
ENSG00000101236_rs2326419:4038745:C:T	0.0166476	0.167375
ENSG00000101333_rs6133653:8998906:A:T	0.040481	0.920835
ENSG00000101367_rs11473489:31475876:C:CT	0.00022741	0.259495
ENSG00000101670_rs7231795:47135972:T:C	9.60255e-07	0.0408567
ENSG00000102699_rs9581094:25082630:T:C	0.0363761	0.333591
ENSG00000102763_rs9566878:42490566:A:G	0.00460573	0.045995
ENSG00000102882_rs7201780	0.00398162	0.00530086
ENSG00000103005_rs8052032:58373186:G:T	0.00845633	0.759064
ENSG00000103021_rs71907819:58276888:GT:G	0.00361532	0.704696
ENSG00000103042_rs12928697:59336398:T:G	0.0425886	0.689472
ENSG00000103043_rs55837830:70742688:C:T	9.20141e-06	0.012428
ENSG00000103168_rs867425:84698732:A:C	0.0189049	0.0429762
ENSG00000103510_rs55766044:31117698:C:T	0.0344847	0.000104006
ENSG00000103876_rs6495418:79859536:T:C	0.0381189	0.128786
ENSG00000103932_rs1200348:41821168:T:C	0.000362124	6.48555e-07
ENSG00000103942_rs11635618:83508931:T:G	0.00760352	0.0596774
ENSG00000104231_rs1844358:82638489:A:G	0.0069782	0.861855
ENSG00000104325_rs10112371:91457626:A:G	0.0243171	0.474546
ENSG00000104341_rs16896059:98655937:G:A	0.0258586	0.378561
ENSG00000104442_rs11437403:66518595:C:CA	5.27543e-05	0.0330059
ENSG00000104626_rs77639044:8823786:T:G	0.00311094	0.0534141
ENSG00000104679_rs4348504:23154131:T:C	0.00296383	0.673889
ENSG00000104723_rs1346593	0.0355067	0.694035
ENSG00000104883_rs7258635:7552581:C:T	0.000369753	0.00233907
ENSG00000104979_rs201080997:13898489:AC:A	3.66895e-08	2.65352e-05
ENSG00000105223_rs61505259:41469297:A:G	0.00328711	0.769705
ENSG00000105483_rs12984612:48759091:T:G	3.13902e-06	0.0224147
ENSG00000105497_rs2864106:52059152:G:A	4.22252e-05	0.701802
ENSG00000105607_rs2965216	0.0222415	0.00184956
ENSG00000105612_rs201080997:13898489:AC:A	0.0486098	0.619507
ENSG00000105750_rs62124035:21140118:G:C	0.00149636	4.87157e-05
ENSG00000106399_rs28916321:7674900:C:T	6.84188e-05	0.00536025
ENSG00000106608_rs6463212:43989736:A:T	0.0202774	8.48444e-05
ENSG00000106610_rs199650044:66801434:CATA:C	3.59597e-08	6.26351e-08
ENSG00000106686_rs10758641:4677630:C:G	0.00334657	0.115052
ENSG00000106733_rs3780180	1.02004e-06	0.384934
ENSG00000106771_rs11788825:111829757:T:G	0.000190162	8.00873e-06
ENSG00000107537_rs7896826:13339681:C:T	0.000519168	0.0839155
ENSG00000107554_rs11594024:101654991:C:A	3.1534e-05	0.148687
ENSG00000107581_rs112813667:120037604:C:T	0.0106815	0.798838
ENSG00000107959_rs7917172:3147926:C:T	0.00261299	0.0982722
ENSG00000108384_rs3887355:56538639:T:C	0.00723429	0.133502
ENSG00000108509_rs56126318:4937351:G:T	0.00965832	0.285122
ENSG00000108592_rs6504179:61812995:T:G	1.4068e-06	0.000257666
ENSG00000108639_rs4071641	0.010361	0.518774
ENSG00000109323_rs227284	3.53862e-05	0.016436
ENSG00000109606_rs73093253:24589064:G:A	0.0010991	0.00574739
ENSG00000109667_rs4318649:10016815:T:C	0.00511583	0.0213052
ENSG00000109686_rs11937572:152255264:G:A	0.0239978	0.869795
ENSG00000109787_rs11732588:39442681:G:C	0.0129896	0.880576
ENSG00000110074_rs682991:126167696:T:C	0.0157121	0.000467082
ENSG00000110200_rs630074:71904937:C:T	0.013493	0.5172
ENSG00000110435_rs2956082:34897182:C:A	0.000483641	0.00435153
ENSG00000110660_rs12225862:107738830:G:A	0.000560506	0.564577
ENSG00000110888_rs7314917:30956852:A:G	0.0194003	0.0187544
ENSG00000111229_rs138707954:110745597:AG:A	1.0969e-05	0.000763968
ENSG00000111348_rs5796618:15121223:TC:T	0.00895388	0.185131
ENSG00000111602_rs774031:56824192:C:T	9.22064e-09	6.0515e-08
ENSG00000111666_rs2695293:102087015:C:A	0.0179645	0.538623
ENSG00000111788_rs2113899:9433483:T:C	0.0246345	0.029872
ENSG00000111906_rs9482644	0.0223046	0.000293663
ENSG00000111907_rs568340:125484547:G:A	0.0267237	0.000966415
ENSG00000112139_rs13203140:37630133:C:T	8.29866e-06	0.999767
ENSG00000112294_rs2817244:24464511:G:T	0.0163636	0.169297
ENSG00000112306_rs9483504:133135886:A:G	0.00771678	0.422087
ENSG00000112511_rs241439:32797537:T:G	0.00975823	0.573231
ENSG00000112514_rs2858312:32667230:G:C	0.0266233	0.682736
ENSG00000112685_rs1161761	0.0495808	0.605941
ENSG00000112699_rs139038823:2382162:CAA:C	0.000444532	0.000186644
ENSG00000112855_rs4141841:140203432:C:T	0.0278069	0.84188
ENSG00000112941_rs12188231	0.0325408	0.107516
ENSG00000112992_rs750583:43430295:G:C	0.00203134	8.89609e-07
ENSG00000113231_rs4273585	0.0140341	0.0155193
ENSG00000113595_rs5868413:64936767:CT:C	0.005165	0.00225398
ENSG00000113621_5:134257519	0.0193889	0.000192172
ENSG00000113812_rs3821869:53893840:C:A	0.00862142	0.228861
ENSG00000114054_rs655748:136103287:G:A	0.0216992	0.183644
ENSG00000115129_rs10170821:24260145:G:C	0.00213257	8.62441e-05
ENSG00000115216_rs6760868:27525263:A:G	0.0195941	0.816702
ENSG00000115355_rs4671986:55112183:G:A	0.000152708	0.872371
ENSG00000115421_rs13002767:60285450:T:A	0.0434771	0.742665
ENSG00000115464_rs17019101:60494383:T:C	0.0156891	0.790822
ENSG00000115504_rs6545958:62810441:T:C	1.93021e-06	0.00162686
ENSG00000115525_rs2679722:86135154:G:A	1.78938e-05	0.651628
ENSG00000115750_rs2245344:9985670:T:C	3.08496e-05	7.82855e-08
ENSG00000115756_rs7580561:10533829:A:T	1.14618e-08	0.00567042
ENSG00000115816_rs11680401:37465738:A:T	0.00724394	0.00755865
ENSG00000115839_rs2043758:136148402:A:T	0.0251227	0.071115
ENSG00000115866_rs309147:136697320:C:T	0.0263424	0.501504
ENSG00000116044_rs56174754:177259646:T:G	0.0393389	0.491739
ENSG00000116199_rs4652346:178997159:C:T	0.0165324	1.40026e-05
ENSG00000116539_rs7535292:155127749:T:C	0.0429021	0.535555
ENSG00000116729_rs9436818:68852194:A:G	0.0129226	0.380352
ENSG00000116791_rs28482086:75226252:A:G	1.37214e-05	0.00149384
ENSG00000116857_rs4915486:201110963:C:T	0.00328998	9.30352e-06
ENSG00000116874_rs10923740:119600287:C:T	5.32818e-05	2.50594e-05
ENSG00000117226_rs142326907:89455994:CTT:C	4.2848e-05	0.00713925
ENSG00000117868_rs368244106:158510302:C:T	0.000351825	1.35431e-05
ENSG00000118197_rs11588318:200638662:G:A	0.000497805	0.00242297
ENSG00000118640_rs55692129:85792404:A:T	0.00123483	9.64913e-05
ENSG00000118873_rs11118431:219999696:C:T	0.0232121	0.0802289
ENSG00000118900_rs8048701:4913537:T:A	0.000304632	0.269939
ENSG00000118961_rs10170771	0.0163318	0.0236665
ENSG00000119383_rs3118634:131905854:G:A	0.0100165	0.784706
ENSG00000119471_rs10817331:115146053:T:G	1.78732e-05	3.651e-05
ENSG00000119684_rs2012627:75443103:G:A	0.0499456	0.00609819
ENSG00000119698_rs1243557:95366064:A:G	0.028977	0.553688
ENSG00000119771_2:23629198:C:A	0.00950648	0.561661
ENSG00000119878_rs4953409:46888620:G:A	0.00404293	0.110527
ENSG00000119888_rs4953495:47578181:A:G	0.00359297	0.00429633
ENSG00000119943_rs2296441:100144782:C:T	0.00299929	0.00012787
ENSG00000119950_rs35212840:112042591:A:T	0.00906129	0.019695
ENSG00000120253_rs9688350:150052113:A:T	0.000358026	0.0019185
ENSG00000120256_rs9397419:150206208:A:G	0.0257811	0.000535655
ENSG00000120278_rs6925854:150812775:C:A	0.00766516	0.623512
ENSG00000120451_rs7110591	0.0214586	0.000265118
ENSG00000120549_rs6482339:24029826:C:G	0.0422463	0.795137
ENSG00000120675_rs2281777:43597932:C:G	2.33405e-05	8.12098e-05
ENSG00000120860_rs11111146:102452264:C:A	0.0352914	0.0421473
ENSG00000121064_rs2107432:55043036:A:G	0.0155399	1.05846e-06
ENSG00000121350_rs5796903:21629993:A:AC	0.0138296	1.54439e-09
ENSG00000121390_rs1413926:19463337:C:T	0.0383385	0.687542
ENSG00000121691_rs1049982:34460541:T:C	0.000628303	1.50923e-08
ENSG00000121716_rs73161762:100014846:C:T	0.0360417	0.210116
ENSG00000122034_rs12867531:28010928:A:G	0.00123568	0.00899926
ENSG00000122299_rs8060396:11523244:C:A	0.0188296	0.118579
ENSG00000122490_rs8084231:77720299:A:G	5.25873e-06	6.53754e-06
ENSG00000122692_rs10813918:32996370:C:T	0.0284999	0.344815
ENSG00000123106_rs11049512:28448813:G:A	0.0157884	0.388402
ENSG00000123179_rs112332160:50277342:C:G	0.0188862	0.00292754
ENSG00000123213_rs147952126:65053423:T:TTA	0.0461405	0.0740402
ENSG00000123297_rs2069506:58142854:C:A	0.0348169	0.475648
ENSG00000123415_rs10161263	0.0178243	0.00456761
ENSG00000123427_rs11172344:58193448:T:C	0.00522983	0.743188
ENSG00000123684_rs12724564:212096075:G:A	0.0208692	0.444971
ENSG00000124466_rs2259013:43969757:A:G	1.88427e-05	1.31733e-06
ENSG00000124532_rs793680:24428903:T:C	0.0287083	0.251408
ENSG00000124587_rs9986447:42942779:A:G	0.000398903	9.0931e-06
ENSG00000124613_rs1987278:27366511:A:G	1.05435e-05	0.685695
ENSG00000124664_rs205279	0.0334028	0.199934
ENSG00000125124_rs9940094:56506126:C:A	0.00200798	9.04604e-08
ENSG00000125388_rs3021136	1.05552e-08	1.22101e-06
ENSG00000125449_rs9913538	0.0194804	0.863597
ENSG00000125629_rs11675576:118633541:C:T	0.0187472	0.888516
ENSG00000125733_rs1049230:6751281:C:T	0.0400608	0.440962
ENSG00000125991_rs12625762:34158587:G:A	0.00724811	5.55728e-06
ENSG00000126005_rs6060313:33810869:C:T	0.0270252	0.078488
ENSG00000126804_rs10139435:65378120:G:A	0.0132403	0.77984
ENSG00000126870_rs2527202:158738849:T:C	3.66729e-05	1.02937e-06
ENSG00000127328_rs497758:69963871:C:A	0.0197775	0.0699274
ENSG00000127399_rs2159236:150017214:A:G	1.31302e-07	5.4365e-08
ENSG00000127947_rs2190097:77038945:C:T	5.25026e-06	0.229246
ENSG00000128185_rs2241139:21103838:C:T	0.019979	0.908594
ENSG00000128203_rs2105952:26831624:C:T	0.00164303	0.0104735
ENSG00000128604_rs3807306	8.12972e-05	0.0033831
ENSG00000128891_rs661488:40721420:G:C	0.0164152	9.90589e-05
ENSG00000128928_rs17672016:40720904:G:A	0.00417055	0.0593525
ENSG00000129055_rs11299516:134203230:GA:G	2.14764e-06	3.31771e-08
ENSG00000129347_rs7252288:10703602:T:C	0.0217043	0.173685
ENSG00000129460_rs8014254:23938252:C:T	0.0280168	0.225979
ENSG00000129925_rs2071916:426476:T:C	1.69436e-10	8.04354e-11
ENSG00000130158_rs56965685:11373641:G:A	0.00344186	0.000879729
ENSG00000130177_rs7994573:115008388:T:C	2.44297e-05	0.068184
ENSG00000130312_rs6903:17417565:C:T	0.0377119	6.06159e-05
ENSG00000131013_rs56397000:150060483:C:T	0.00106897	0.775987
ENSG00000131236_rs56342108:40337580:A:T	0.0337813	0.665856
ENSG00000131238_rs5773687:40562501:A:ATGC	2.25861e-06	0.000377526
ENSG00000131435_rs7737937:131614981:G:A	0.013503	0.0292844
ENSG00000131470_rs2830:40704563:G:A	0.00236275	0.886191
ENSG00000131899_rs182226671:18128865:C:G	0.000812474	0.25506
ENSG00000131941_rs4377259:33981927:T:C	0.0327205	0.470914
ENSG00000132031_rs7560747:20263847:A:G	0.0490249	0.0304277
ENSG00000132141_rs2062101:33254856:G:A	0.0251352	0.000346257
ENSG00000132155_rs36057901:12607208:G:A	0.0468967	0.671204
ENSG00000132386_rs68098051:1690302:CAA:C	1.98819e-05	6.15631e-05
ENSG00000132470_rs3862481:73720727:G:A	0.0287219	0.39601
ENSG00000133065_rs823154	0.0204105	0.14515
ENSG00000133704_rs12370947:30786569:G:C	0.0167995	0.0445562
ENSG00000133710_rs6876628:147459872:T:C	0.000194013	0.00486206
ENSG00000133773_rs1980200	0.0415395	0.671159
ENSG00000134013_rs7013339:23204461:A:G	0.0076205	4.03363e-05
ENSG00000134146_15:35639798:A:ACTAAATATTTGGACTAAATATTTG	0.0161482	0.860631
ENSG00000134202_rs1332018:110282972:G:T	0.00196642	0.724593
ENSG00000134247_rs6657819:117526905:G:C	1.01043e-05	0.00425501
ENSG00000134265_rs653624:10553789:C:A	0.00183016	0.400523
ENSG00000134285_rs2453476:49272206:T:C	0.0107509	0.403488
ENSG00000134287_rs4760647:49278643:G:A	0.037475	0.116933
ENSG00000134308_rs6729452:9832809:A:G	0.0197984	0.00122269
ENSG00000134369_rs650720	1.09829e-06	0.0984014
ENSG00000134757_rs9964450:29029589:G:A	0.0240784	0.059348
ENSG00000134909_rs146118165:128930304:GAAGA:G	0.00139299	0.141097
ENSG00000135404_rs7132965:56930069:C:T	0.0373512	0.259715
ENSG00000135541_6:135989814:G:GTA	0.00456178	0.000202031
ENSG00000135587_rs9487068:109671845:G:C	0.0203871	0.204872
ENSG00000135617_rs3835072:73467676:GAA:G	0.0365516	0.00981901
ENSG00000135637_rs3732300:75099381:T:C	0.0361814	0.651053
ENSG00000135643_rs1707498:71478626:C:A	0.033064	0.367719
ENSG00000135913_rs987339:218711818:G:C	0.0359623	0.853279
ENSG00000136044_rs1107756:105629239:A:G	0.0382631	0.000814979
ENSG00000136098_rs2897977:52711429:G:T	0.000465988	0.144098
ENSG00000136238_rs1638202	0.0413151	0.751952
ENSG00000136273_rs6942767:47363815:G:A	0.0108385	0.572346
ENSG00000136718_rs4458251:131081765:T:C	0.00172065	0.0163894
ENSG00000136824_rs9942894:106914905:A:G	0.0198838	8.88387e-07
ENSG00000137106_rs7856656	0.0197101	0.0406259
ENSG00000137185_rs1339898:28395506:C:T	0.00474359	0.00307386
ENSG00000137409_rs5875563:36928418:AC:A	0.0120085	0.0868419
ENSG00000137411_rs2844651:30900664:T:C	5.17503e-06	0.0165504
ENSG00000137500_rs642373:82945697:G:A	0.00462236	0.156571
ENSG00000137806_rs6493000:41613100:G:C	0.0058679	0.00709756
ENSG00000137944_rs7517036:89443967:A:T	0.00344023	5.08341e-06
ENSG00000138095_rs35813524:44133774:C:G	0.000315627	0.000437546
ENSG00000138101_rs10865366:25873300:A:C	0.0253067	0.858788
ENSG00000138386_rs28501593:191310199:G:A	0.00211472	0.077794
ENSG00000138593_rs11070727:50131437:T:C	0.0191104	0.812467
ENSG00000138669_rs11722958:82083520:T:A	0.00445864	0.839531
ENSG00000138744_rs2242471:76878716:G:C	0.00579348	0.808909
ENSG00000138757_rs4422437:77514866:T:G	0.0104518	0.375798
ENSG00000138771_rs2035945	1.11776e-06	2.16641e-06
ENSG00000138829_rs78401029:127864436:A:C	0.000881152	0.988065
ENSG00000139131_rs2218650:33734783:A:G	0.033769	0.535567
ENSG00000139132_rs6488051:32532733:G:C	0.000365825	0.00621755
ENSG00000139194_rs7294478	0.0150248	0.727386
ENSG00000139620_rs1110432:49110248:G:A	0.00579077	0.00580188
ENSG00000139835_rs7317038:114012898:C:T	6.51556e-05	0.00152636
ENSG00000139899_rs2273629:24898751:G:A	0.000422254	0.0303439
ENSG00000140455_rs72748979:63743919:A:C	0.0145613	0.550943
ENSG00000140545_rs35864015:89516606:T:A	3.76969e-08	1.16999e-06
ENSG00000140612_rs4980353:85512767:G:C	0.0492381	0.460577
ENSG00000140718_rs11076029:54365347:G:T	0.0402363	0.821607
ENSG00000140750_rs8049531:24979232:G:A	0.0355424	0.710897
ENSG00000140943_rs244865:84314609:A:T	0.0123411	0.297085
ENSG00000141012_rs35588597:88917472:TC:T	8.50433e-05	0.00011193
ENSG00000141027_rs1476776	0.0114629	0.808101
ENSG00000141219_rs1972989:71187273:A:G	0.0135167	0.422652
ENSG00000141295_rs4794318:46028071:G:A	0.000273728	0.16223
ENSG00000141458_rs1788775:21290690:C:G	0.0111065	0.555183
ENSG00000141560_rs7210081:80620517:G:A	0.00885102	3.95856e-05
ENSG00000141644_rs8097750:48198611:G:A	0.0346912	0.790813
ENSG00000141698_rs1043002:39979062:T:A	6.54763e-12	5.61265e-08
ENSG00000141736_rs36041305:38166412:G:GT	0.0252447	0.666038
ENSG00000141759_rs10438902:77745640:A:G	7.2294e-05	0.000272705
ENSG00000142166_rs2834083	0.0366794	0.591466
ENSG00000142168_rs76801162:33568601:T:C	0.00759145	0.232067
ENSG00000142197_rs3951:37492920:C:G	0.033999	0.141772
ENSG00000142632_rs6690317:16516585:T:C	0.0341814	0.011764
ENSG00000142657_rs2027330:10275592:C:T	2.89106e-05	1.64306e-08
ENSG00000142794_rs200166141:21807880:CCTCTGTCT:C	0.0284928	0.144293
ENSG00000142867_rs1536120	0.0327922	0.207165
ENSG00000143067_rs12127605:120228184:C:T	3.30765e-05	9.13864e-05
ENSG00000143079_rs11102471:112939784:G:C	0.0173731	0.0333452
ENSG00000143198_rs4147596:165601365:T:C	0.0488505	2.39756e-05
ENSG00000143337_rs1300068:179858333:C:T	1.39054e-05	1.25877e-05
ENSG00000143369_rs698915	3.28872e-05	0.00252996
ENSG00000143382_rs698915	3.78754e-08	6.4976e-08
ENSG00000143393_rs2932582:151932186:G:C	0.0497246	0.7852
ENSG00000143631_rs6666097:152192825:C:T	0.00564223	0.459567
ENSG00000143727_rs300756:233416:G:A	0.0333778	0.714279
ENSG00000144228_rs10178579:139231958:G:A	0.042166	0.198087
ENSG00000144452_rs3048929:215821214:GTAT:G	0.0142416	0.41845
ENSG00000144827_rs1317295:112022024:C:T	0.000137978	0.121309
ENSG00000144935_rs9853974:142414888:G:A	0.0257655	0.813082
ENSG00000145214_rs1377586:961373:G:A	0.000805269	0.122529
ENSG00000145354_rs369092140:103731572:AT:A	0.000420833	0.415096
ENSG00000145414_rs2086240:164098317:T:G	0.014763	0.392759
ENSG00000146085_rs6909128:49420758:T:G	2.45757e-05	8.93504e-05
ENSG00000146409_rs12209781:133178712:G:T	0.0370114	0.608094
ENSG00000146530_rs13247878:12406186:G:A	0.00254126	0.738412
ENSG00000146535_rs208354:2780863:C:A	0.018806	0.534614
ENSG00000146707_rs3851929:76207290:A:C	0.0236869	0.653078
ENSG00000146833_rs2527901:99525112:A:T	0.00523954	0.00606432
ENSG00000147697_rs148846943:130725652:T:TG	0.000593329	0.00106044
ENSG00000147813_rs896955:144658370:C:T	0.000302399	0.00800776
ENSG00000148290_rs553877:136214955:A:G	5.22622e-05	0.0320224
ENSG00000148334_rs45585631:130942972:T:C	0.0371491	0.804061
ENSG00000148341_rs11537529:131790531:C:T	0.00241402	0.00442937
ENSG00000148680_rs7086484:92533729:G:A	0.000312846	1.23972e-06
ENSG00000148814_rs76805118:134144739:G:A	4.28398e-05	0.0122049
ENSG00000148925_rs10832031:13406306:C:T	0.0280185	0.755708
ENSG00000149054_rs12273062:6927344:C:T	0.0424244	0.00167786
ENSG00000149084_rs3736505:43876435:A:G	1.23279e-07	0.000986061
ENSG00000149089_rs12275911:34966492:T:C	0.0488696	0.000580367
ENSG00000149262_rs1790235:77607650:T:A	0.00305366	0.120914
ENSG00000149357_rs12271951:71101342:G:A	0.0480349	0.540856
ENSG00000151233_rs11610892:42516769:G:C	0.0380384	0.0236335
ENSG00000151470_rs337277	0.000452794	0.000495281
ENSG00000151498_rs486119:134143420:A:G	0.000958138	0.890205
ENSG00000151690_rs4853700:191264390:T:C	2.96872e-05	2.71195e-05
ENSG00000151725_rs3806796:185652147:G:A	0.00159773	8.42163e-07
ENSG00000151806_rs1439358:44609184:C:T	3.49848e-05	0.293741
ENSG00000151835_rs75189966:24651839:C:T	0.0193557	3.58662e-05
ENSG00000152219_rs79015183:30393699:T:TTACTC	0.000235112	0.463168
ENSG00000152240_rs58554122:43583543:A:T	0.0133492	0.423049
ENSG00000152291_rs6547612:85551184:C:T	1.95449e-10	5.8163e-10
ENSG00000152348_rs12516434:81428072:T:A	0.0222774	0.000299109
ENSG00000152669_rs231622:54528590:G:A	0.000190681	1.24293e-06
ENSG00000152944_rs10842850:27221182:C:T	0.0206601	0.228093
ENSG00000153406_rs6500620:4647810:A:G	0.000182689	0.494949
ENSG00000154059_rs618229:22018786:T:C	0.040235	0.754812
ENSG00000154065_rs1711456:21277354:G:C	0.0221352	0.778201
ENSG00000154229_rs12941339:64282381:G:A	7.80052e-06	0.222464
ENSG00000154358_rs10916277:228386374:C:T	3.56569e-06	0.287014
ENSG00000154380_rs7535106:225935369:G:A	0.0478464	0.0501313
ENSG00000154813_rs712874	0.000622275	1.84453e-06
ENSG00000155542_rs744023:56197078:C:T	0.00165912	0.0102069
ENSG00000155957_rs10400539:66544256:G:A	5.06565e-05	8.20147e-08
ENSG00000155974_rs4913315:67488532:C:T	0.0300023	0.896779
ENSG00000156239_rs2832137:30280016:A:T	0.0232217	0.000165188
ENSG00000156253_rs77765264:29378754:T:TC	0.0123216	0.0773251
ENSG00000156261_rs2776211:30268642:A:C	0.00126671	0.660142
ENSG00000156521_rs7094581:71922900:C:T	0.00673716	0.926533
ENSG00000156639_rs12664695:36934392:C:T	0.0447221	0.734974
ENSG00000156795_rs11343352:124464987:CA:C	2.02542e-05	0.00111153
ENSG00000157379_rs77780372:25186060:TTAAG:T	0.0431944	0.180158
ENSG00000157510_rs13156539:148606052:A:C	0.024186	1.05596e-05
ENSG00000157823_rs7183842:90400030:G:A	0.00200558	0.449959
ENSG00000157881_rs7531583:1706160:A:G	0.0389373	0.80944
ENSG00000158623_rs6467312:130348044:C:T	0.0107422	0.0106714
ENSG00000159063_rs9651744:77777402:C:T	0.00727168	0.350576
ENSG00000159111_rs72829845:46619691:T:C	0.044131	0.371424
ENSG00000159445_rs2338201:151845650:G:C	0.0036976	0.024146
ENSG00000159648_rs9924293:58017839:C:G	0.00171588	0.0149444
ENSG00000160209_rs2838354:45119857:T:C	0.00778675	0.00261725
ENSG00000160588_rs1715456:118123517:A:G	0.00162067	0.0629181
ENSG00000160695_rs1177562:118949331:C:T	0.0287345	0.067611
ENSG00000160714_rs6427183:153706699:T:G	0.031349	0.0823885
ENSG00000160766_rs2066981:155172379:G:A	0.00518033	0.00178743
ENSG00000160867_rs351855	0.00315384	0.967802
ENSG00000160886_rs2585175:143781289:G:C	0.00385493	0.0101467
ENSG00000161558_rs1062919	0.0155461	0.807521
ENSG00000161618_rs7259076:49956274:C:G	8.26664e-06	0.0217975
ENSG00000162222_rs516580:62492124:C:G	0.0458001	0.00128066
ENSG00000162552_rs71638833:22549094:G:A	0.0380646	0.0693222
ENSG00000162704_rs35108647:183579726:TG:T	0.000136569	0.000137932
ENSG00000163131_rs72704639:150798335:A:C	0.000421569	1.06234e-05
ENSG00000163138_rs28581620:20773418:T:A	0.0169884	0.00162582
ENSG00000163362_rs4915471	0.012701	0.892496
ENSG00000163539_rs11129559:33790487:T:C	0.0109995	0.000306754
ENSG00000163682_rs2687969:39452499:T:C	0.000528375	0.00530265
ENSG00000163689_rs28559994:59269300:G:A	0.0496072	0.591963
ENSG00000164070_rs11098937	2.48151e-05	0.201826
ENSG00000164096_rs372391031:120344141:G:C	0.0386489	0.39977
ENSG00000164244_rs2035471:125877635:A:G	0.00429079	0.621444
ENSG00000164307_rs27039:96114550:G:A	0.0414281	0.011532
ENSG00000164506_rs9497725:147524962:T:G	0.0128232	0.57188
ENSG00000164520_rs1334510:150201179:A:G	0.0276374	0.00160409
ENSG00000164542_rs11982459:36431570:C:T	3.64609e-06	2.61903e-08
ENSG00000164548_rs10230819:22897641:T:C	0.0308281	0.781533
ENSG00000164597_rs2712188:107192402:C:T	0.00171359	0.000135752
ENSG00000164713_rs12113294:97910637:C:G	0.000264279	0.0268496
ENSG00000164855_rs7781047:1591434:A:G	0.0185538	0.484576
ENSG00000164930_rs11329397:104335661:CT:C	0.000283066	0.780071
ENSG00000164944_rs12545488:96452143:T:G	0.0168835	0.79857
ENSG00000165055_rs10265601:128312704:G:A	0.0104262	0.00517877
ENSG00000165138_rs4743284:101583106:G:A	0.000361494	0.00996055
ENSG00000165449_rs1171600:61439422:C:A	0.0227102	0.783474
ENSG00000165487_rs9550736:22052896:C:T	0.0350235	0.294379
ENSG00000165502_rs12147470:50028672:T:C	0.019708	0.858028
ENSG00000165650_rs144031212:119055011:AACAC:A	6.0251e-05	5.21068e-08
ENSG00000165819_rs151156068:21933157:C:CA	0.00434131	0.7405
ENSG00000165879_rs11189127:99079023:G:A	0.0413917	0.685972
ENSG00000165948_rs56294923:94563064:T:C	0.0114335	0.118485
ENSG00000166105_rs12180	3.89656e-07	0.0020289
ENSG00000166128_rs8029871:63314763:G:T	0.0292726	0.698595
ENSG00000166165_rs2296487:103996205:T:C	0.0176325	0.0813478
ENSG00000166275_rs10786714:104598606:G:C	0.0274218	0.151205
ENSG00000166289_rs919400	0.000790473	2.56322e-09
ENSG00000166348_rs36107511:74830950:CAA:C	0.0496758	0.107474
ENSG00000166435_rs9787897:74659302:A:T	3.47954e-08	3.27814e-05
ENSG00000166436_rs7123653:8722621:A:C	0.000199179	1.12203e-06
ENSG00000166441_rs2073687	0.00910934	0.0346595
ENSG00000166548_rs112556957:66706146:CA:C	0.0264954	0.551752
ENSG00000166669_rs36196633:10474614:G:A	0.00647723	0.00728834
ENSG00000166750_rs34991817:33569308:G:A	0.0227606	0.14636
ENSG00000166762_rs2601014:43756013:G:C	0.0432548	0.577649
ENSG00000166847_rs62032983:23653343:C:T	1.24183e-08	2.04764e-07
ENSG00000167005_rs80072323:56892769:G:A	0.00626948	0.577604
ENSG00000167543_rs200199476:27895682:GC:G	0.0329175	0.772352
ENSG00000167608_rs641738	8.52727e-07	6.21233e-05
ENSG00000167969_rs3803695	0.000372187	0.00256469
ENSG00000168028_3:39466752:CTTTTTTTTTTTTTTTTT:C	0.000475637	0.000149321
ENSG00000168038_rs139635297:41845554:C:T	1.60568e-06	1.19506e-05
ENSG00000168066_rs140296418:64964937:A:AG	0.00364407	0.866961
ENSG00000168228_rs10007597:25311049:G:A	0.00243935	0.726543
ENSG00000168385_rs75590598:242185654:G:A	0.00187563	0.00103475
ENSG00000168386_rs5851184:99501781:C:CT	0.00791326	1.37272e-06
ENSG00000168389_rs72668795:40589065:T:C	0.0401994	0.746606
ENSG00000168397_rs6716290	0.0205199	0.662096
ENSG00000168411_rs8058133:74657485:A:T	1.41532e-07	4.0377e-05
ENSG00000168434_rs58582122:23450051:C:CA	0.00268652	1.49743e-05
ENSG00000168653_rs3768324:39492462:C:T	7.31301e-11	3.82783e-06
ENSG00000168724_rs12153787:34957827:A:G	0.037128	0.803938
ENSG00000168795_rs4242645:38178570:T:C	0.02702	0.52436
ENSG00000168803_rs60215083:43604430:AT:A	0.0289485	0.151864
ENSG00000169131_rs11742156:178147833:C:T	0.0215473	0.184613
ENSG00000169220_rs56235845:176798040:T:G	0.00998607	0.795292
ENSG00000169398_rs883596:141635648:G:C	0.0182446	0.717344
ENSG00000169435_rs34832471:74434741:G:A	0.00710796	0.000196949
ENSG00000169598_rs4654547:4555847:C:T	0.0310636	0.0403335
ENSG00000169902_rs432667:65514633:A:G	1.11757e-05	0.000282143
ENSG00000169991_rs9426713:19347951:C:T	0.0118544	0.845847
ENSG00000170089_rs374743389:177267839:T:C	0.0260422	0.151129
ENSG00000170291_rs402514:7158203:T:G	6.30754e-05	9.82111e-11
ENSG00000170310_rs12450827:9343689:T:C	0.0434428	0.509902
ENSG00000170430_rs11016853:131443990:A:G	0.00388577	0.0295451
ENSG00000170465_rs112825062:52868448:CT:C	0.0311531	0.968248
ENSG00000170633_rs34389860:121378513:G:A	0.0364468	0.545082
ENSG00000170745_rs12473301:18060442:G:A	0.0277899	0.00575257
ENSG00000170873_rs58108091:125863657:C:T	3.9648e-05	6.67621e-05
ENSG00000170906_rs254262	0.000814218	0.836195
ENSG00000171033_rs1062248:79516759:G:T	0.0149571	0.722574
ENSG00000171045_rs13248662:143490171:A:G	0.0418211	0.000270085
ENSG00000171055_rs908758:36016396:G:T	0.0363103	0.207451
ENSG00000171103_rs7567861:29035849:C:T	0.000383206	0.000716222
ENSG00000171298_rs12952612:78071052:T:C	0.00251647	0.000790484
ENSG00000171469_rs10405845:9765366:G:A	0.0182689	0.00352805
ENSG00000171700_rs6062343:62695931:G:A	0.0160654	0.302521
ENSG00000171766_rs143910737:45627003:T:TA	0.0263964	0.0182216
ENSG00000171928_rs9915565:18687228:A:G	0.0244647	0.00355791
ENSG00000171953_17:18279292:CA:C	0.00270461	0.420355
ENSG00000172006_rs1640271	0.000210282	0.0348052
ENSG00000172057_rs12936231:38029120:C:G	0.0328098	0.0173341
ENSG00000172262_rs6879107:44051305:C:A	0.0471904	0.719513
ENSG00000172296_rs76828749:13050236:C:T	0.00364711	0.749905
ENSG00000172478_rs4675792	0.0160495	0.62579
ENSG00000172500_rs583887:65644027:T:C	4.15384e-05	3.97569e-05
ENSG00000172548_rs6860540	1.97867e-07	1.82879e-08
ENSG00000172638_rs687672:65649984:T:C	0.000348405	0.000617642
ENSG00000172731_rs7921619:72142370:A:T	5.22271e-05	2.28505e-05
ENSG00000172992_rs7225329	0.024246	0.00350266
ENSG00000173210_rs11739374:148520184:C:T	0.00145015	0.0768484
ENSG00000173226_rs34143189:121483042:AAC:A	0.0399965	0.00803772
ENSG00000173273_rs1399054	0.0431702	0.541825
ENSG00000173295_rs574595:8593744:C:T	0.0264411	0.175586
ENSG00000173327_rs140296418:64964937:A:AG	0.0115049	0.928613
ENSG00000173480_rs8100221:58314677:T:C	0.0468107	0.565047
ENSG00000173950_rs9848201:195098843:A:T	0.0213656	0.369946
ENSG00000174106_rs10878362:66417493:C:A	0.0180927	0.762756
ENSG00000174574_rs12043492:39457006:C:T	0.018861	0.000116769
ENSG00000174652_rs28711703:9531425:C:G	1.04704e-06	9.41349e-16
ENSG00000175287_rs55868600:131686624:G:A	0.024787	0.00676241
ENSG00000175352_rs2742519:8933853:T:G	0.00147188	0.251631
ENSG00000175387_rs1787183:45346932:A:T	0.0375863	0.153331
ENSG00000175581_rs7125433:73500926:G:T	0.00942199	0.189258
ENSG00000175611_rs1369156:98556894:A:G	0.000787698	1.06866e-05
ENSG00000175634_rs7131041:67230184:A:T	0.0149656	0.00261895
ENSG00000175643_rs12149160:11439303:G:T	0.0148926	0.00279142
ENSG00000176390_rs75820649:29126420:C:T	0.0121195	0.695025
ENSG00000176826_rs4947486:55061705:G:C	0.0260229	0.916331
ENSG00000176974_rs2449955:18290940:G:A	0.00652035	9.49256e-05
ENSG00000177042_rs71278583:680002:A:AACCAGGATG	0.00108369	0.0142198
ENSG00000177570_rs2514611:119665997:G:A	2.54652e-05	0.580065
ENSG00000177627_rs2731096:48883020:G:T	0.0250863	0.00515752
ENSG00000177889_rs9971741:94164138:G:C	0.036678	0.260921
ENSG00000177951_rs519592:236811:G:A	0.000439396	0.13764
ENSG00000178202_rs74822968:108369173:G:A	0.000796527	2.40046e-06
ENSG00000178209_rs11777239	0.0144317	0.000185124
ENSG00000178252_rs6779394:49157771:G:A	0.00919466	0.0130055
ENSG00000178381_rs141256731:1202237:TTTTC:T	0.00261681	0.0415996
ENSG00000178718_rs56338926:75259335:C:A	2.59044e-05	0.0974657
ENSG00000179041_rs7014306:67365860:C:T	5.42124e-05	0.824892
ENSG00000179152_rs10587245:43650633:TGAA:T	0.00566288	0.575083
ENSG00000179532_rs979752	0.0222576	0.603635
ENSG00000179979_rs2101094:1235643:A:G	0.0241823	0.217851
ENSG00000180185_rs368169:1917494:T:C	9.15067e-06	0.0110595
ENSG00000180370_rs1806440	0.0369925	0.654276
ENSG00000180385_rs113940455:10014165:A:C	0.00348794	0.003215
ENSG00000180817_rs10999191:71975457:G:A	0.0248456	0.322023
ENSG00000180979_rs56143820:42343560:A:G	0.0187199	0.883927
ENSG00000181192_rs34170068:12180569:C:A	0.0219272	0.393308
ENSG00000182004_rs13303040:203507163:C:T	0.0264246	0.81206
ENSG00000182362_rs9984599:47781347:C:G	0.03886	0.134342
ENSG00000182446_rs9675127:79785516:T:G	0.0307545	0.244726
ENSG00000182534_rs35822056:74660847:GA:G	0.00359181	0.246146
ENSG00000182648_rs7800925:156438797:T:C	0.000713203	0.0504449
ENSG00000182670_rs35084296:38622111:A:G	0.0474379	0.694676
ENSG00000182919_rs35396784:93502487:CTT:C	0.000279771	1.74032e-06
ENSG00000183023_rs141682534:40645010:T:TAC	0.00382755	0.99584
ENSG00000183044_rs1730951:8774190:T:A	0.00405935	0.0283045
ENSG00000183087_rs9604480	0.0499176	0.907695
ENSG00000183291_rs146361645:87492531:G:GA	0.0294539	0.419723
ENSG00000183444_rs7784883:97593885:C:T	0.00016741	0.148793
ENSG00000183617_rs2302307:3761652:G:A	0.00434806	7.20749e-05
ENSG00000183826_rs9470806:38139938:G:A	0.0233887	0.00792904
ENSG00000183828_rs2072674:105623512:T:C	0.0381179	2.13981e-06
ENSG00000183891_rs10495701:20197851:A:T	3.42332e-05	3.73126e-05
ENSG00000183935_rs10845697:13184886:G:A	0.0247187	0.000269642
ENSG00000184220_rs140459590:99130917:TCCCACACACACACACA:T	0.0297818	0.499373
ENSG00000184517_rs9939124	0.00674006	0.00440277
ENSG00000184752_rs249171:95427711:C:A	0.0191837	0.314955
ENSG00000184857_rs8061848:9790691:C:T	0.0493781	0.784251
ENSG00000185163_rs11246933:132610314:G:A	0.0200976	6.19692e-05
ENSG00000185252_rs362215:20744111:A:G	0.00141069	0.813162
ENSG00000185414_rs13020339:99715664:G:A	0.0137694	0.20717
ENSG00000185658_rs7283959:40214670:C:T	0.0221805	0.210164
ENSG00000185808_rs4817848:38469723:T:G	0.000561838	0.0105182
ENSG00000185909_rs60482815:49490188:AT:A	1.88247e-05	0.823463
ENSG00000186088_rs2190097:77038945:C:T	0.000249887	0.0223474
ENSG00000186184_rs508999:28208712:A:G	0.00171667	0.00293486
ENSG00000186283_rs1128952	6.98664e-05	0.00464681
ENSG00000186470_rs35162296:26318262:C:T	0.00330242	0.00786949
ENSG00000187164_rs1419832:118670282:A:G	1.35456e-05	0.0894368
ENSG00000187210_rs693165:79128912:T:C	0.0107988	5.55288e-06
ENSG00000187231_rs340357:179948571:G:T	0.0116974	0.00916269
ENSG00000187555_rs7501391:9411028:G:A	0.0314946	0.226122
ENSG00000187741_rs8058179:89846987:A:G	0.0387766	0.126198
ENSG00000188352_rs10811394:20704320:T:C	0.00752421	0.742014
ENSG00000188493_rs1869710:41256375:C:T	0.0347271	0.259963
ENSG00000189298_rs213228:28331252:A:C	0.00368104	0.0388875
ENSG00000189362_rs4577309:191288833:A:G	0.004084	0.0617788
ENSG00000196151_rs9808221:160092023:G:A	0.0177883	0.225848
ENSG00000196152_rs10987645:130181223:C:G	0.00485206	0.546369
ENSG00000196177_rs4980242:124757500:T:A	0.00275511	0.604112
ENSG00000196204_rs9639898:5038559:G:C	8.70408e-08	4.06676e-05
ENSG00000196411_rs6973936:101011922:A:G	0.0372719	0.371149
ENSG00000196504_rs4146903:153485865:C:A	0.0389417	0.344887
ENSG00000196526_rs4383619:7863508:T:C	5.13321e-05	0.0038186
ENSG00000196655_rs11607569:118880668:T:C	4.90951e-06	2.16242e-10
ENSG00000196663_rs7142419:102881485:C:G	0.0413815	0.777469
ENSG00000196756_rs1739653:37049878:T:C	0.0115119	0.0164972
ENSG00000196810_rs4246687:1403479:T:C	0.00986546	0.335075
ENSG00000196950_rs11338551:196608524:AT:A	0.0407991	0.479223
ENSG00000197013_rs4808279	0.00474535	0.1691
ENSG00000197150_rs71712832:150744369:CCGT:C	0.0299198	0.196491
ENSG00000197345_rs583182:68678634:C:T	8.56077e-05	0.000128606
ENSG00000197563_rs9320004:59878048:G:A	3.66595e-05	1.20255e-05
ENSG00000197696_rs1727693:84939756:A:G	0.00319842	0.827055
ENSG00000197746_rs9415998	4.47214e-05	4.48773e-05
ENSG00000198015_rs11314464:93862083:TG:T	0.0072246	0.660989
ENSG00000198093_rs6509598:52441883:G:C	0.00161375	0.391492
ENSG00000198185_rs847086:45147261:T:A	5.8282e-12	0.000325047
ENSG00000198231_rs2854210:61946338:C:A	0.000437919	0.0186097
ENSG00000198373_rs71149000:69442007:GTTAT:G	0.00708405	0.864445
ENSG00000198431_rs2583226:104306305:T:C	0.0249198	0.820054
ENSG00000198496_rs35635387:41356559:A:G	0.000855946	0.0045266
ENSG00000198498_rs1044722	1.05311e-08	0.000345691
ENSG00000198677_rs12054916:94785401:T:C	0.0367495	0.158872
ENSG00000198874_rs10228812:66561114:C:T	0.0335916	0.761084
ENSG00000198917_rs71245393:131676676:G:GAGGCA	0.000852483	0.449417
ENSG00000198924_rs3862016:115322922:C:T	0.0305275	0.857044
ENSG00000198933_rs4794058:45597098:C:T	2.65934e-05	5.62787e-07
ENSG00000203666_rs140218267:245129294:CA:C	0.000668291	0.00428966
ENSG00000203875_rs1059307:86387888:G:T	0.0125949	0.00295748
ENSG00000204070_rs6032152:44010210:G:T	0.000698282	0.0641797
ENSG00000204130_rs6480326:70077449:A:G	0.0143973	0.00882873
ENSG00000204138_rs313154:28467612:A:C	0.0266917	0.858902
ENSG00000204228_rs991760:32823567:G:A	0.00539832	0.194525
ENSG00000204267_rs2856995:32783337:T:A	0.000615946	0.00149511
ENSG00000204351_rs537160:31916400:A:G	0.00282626	1.84366e-05
ENSG00000204392_rs35406540:32670368:A:G	0.028943	0.0476645
ENSG00000204439_rs140872668:32345007:AAAG:A	0.00415987	0.168136
ENSG00000204516_rs3130615:31475413:G:A	7.04385e-06	0.0045852
ENSG00000204520_rs3020583:31351512:G:A	0.0338762	0.000383115
ENSG00000204525_rs1050716:31238230:G:C	2.16991e-07	4.57673e-05
ENSG00000204536_rs1042127:31084170:A:C	0.0439059	0.0173317
ENSG00000204632_rs2735094:29917360:T:A	0.00315023	0.124025
ENSG00000204946_rs1053298:148951992:G:T	7.0678e-06	0.0759579
ENSG00000204959_rs1635077:144074629:A:G	0.0416661	0.000147841
ENSG00000205420_rs4597111:52900648:T:C	0.0279854	0.212004
ENSG00000205464_rs73138787:81568934:G:A	0.000535383	0.271255
ENSG00000205581_rs6517522	0.0272087	0.101006
ENSG00000206503_rs452850:29799481:G:A	0.0293522	2.60857e-11
ENSG00000213020_rs4803133:53974402:C:G	0.0314877	0.783186
ENSG00000213462_rs12530733:64547832:C:T	0.000342065	9.38423e-06
ENSG00000213676_rs9267803:32101762:C:T	0.0160584	0.0688688
ENSG00000213722_rs2530712:30936660:T:C	0.00430933	0.517248
ENSG00000214078_rs11699793:34271574:C:T	7.96833e-06	3.413e-07
ENSG00000214087_rs8071492:79682650:G:A	0.000433585	4.58922e-06
ENSG00000215114_rs16923452:59331593:A:G	0.00478218	0.35101
ENSG00000219891_rs34349668:28437763:AGAG:A	3.25732e-05	0.119474
ENSG00000221823_rs11679348:69387567:G:C	0.0393099	0.514271
ENSG00000221923_rs4802926:52880265:C:T	1.49054e-07	7.17284e-07
ENSG00000225484_rs61860459:81758307:C:T	0.033998	0.0019828
ENSG00000225733_rs62241810:14978154:C:T	0.022789	0.00166398
ENSG00000225855_rs6686750:154419843:A:G	0.0481055	0.0134902
ENSG00000229043_rs6962809:1208889:A:G	0.0170028	0.0548929
ENSG00000230439_rs4847253:94197311:G:A	2.37851e-07	0.0231687
ENSG00000231365_rs67391130:119743174:T:C	0.00192154	0.00028601
ENSG00000232445_rs7781222:100984285:A:T	1.32257e-05	0.00365382
ENSG00000232855_rs2831946:30021710:C:T	0.00788208	0.599272
ENSG00000233006_rs2631369:131705266:G:C	0.000790809	0.0383951
ENSG00000233016_rs11145844:139613998:C:T	0.00238866	0.0279137
ENSG00000233276_rs4855882:49715354:G:T	0.019204	0.763469
ENSG00000233901_rs17457362	0.00920792	0.76047
ENSG00000233927_rs145917648:8397700:AAAAAT:A	0.00710746	0.00561791
ENSG00000234072_rs12471703:27738854:C:T	0.00251565	0.69119
ENSG00000234171_rs12629:3609064:G:A	2.15952e-09	3.90851e-08
ENSG00000235109_rs34098432:28384241:T:TAA	0.00176162	0.702213
ENSG00000235884_rs7137488:30958302:C:T	0.00254213	0.626052
ENSG00000237765_rs16892232:15657636:C:G	0.0482473	0.000495521
ENSG00000237975_rs55879323:152168740:C:T	0.0103437	0.0514742
ENSG00000240344_rs10184098:202004190:G:C	2.19921e-05	7.27997e-05
ENSG00000240849_rs232734:48766851:T:C	0.011818	0.0756539
ENSG00000241837_rs78143111:35307148:G:A	0.00810249	0.150216
ENSG00000242110_rs919310:34041069:T:C	0.0011097	0.8461
ENSG00000242247_rs75606876:43220017:T:TA	0.00345894	7.69966e-05
ENSG00000242588_rs6467202:128308386:C:T	5.70819e-05	0.124921
ENSG00000243317_rs3110823:135357476:A:C	1.22627e-06	0.000344324
ENSG00000243660_rs11389503:43873993:G:GA	0.0342009	0.00339261
ENSG00000243753_rs2248162:29915061:T:C	0.0180454	0.900211
ENSG00000244038_rs10916794:20756658:A:G	0.0365395	0.694053
ENSG00000244879_rs504781:50648339:T:C	3.73818e-07	9.68779e-06
ENSG00000245532_rs2904975:65173754:C:T	0.000513376	0.0136929
ENSG00000245648_rs2617151	4.12667e-05	0.243286
ENSG00000245958_rs71612601:120332595:C:T	0.0129188	0.0621112
ENSG00000247556_15:41796901	0.0402307	0.194808
ENSG00000247572_rs56206535:80518799:C:A	0.0151183	0.864691
ENSG00000247708_rs62290302:4720962:C:T	0.00596784	0.5596
ENSG00000248275_rs4976831:180706652:T:C	8.30022e-06	0.00347997
ENSG00000250317_rs75660081:25917232:A:G	1.98783e-08	0.863487
ENSG00000250565_rs1456014:46899742:A:G	0.00480739	0.170209
ENSG00000250786_rs374218:9548443:A:G	0.0318763	0.022705
ENSG00000251022_rs11724740:83851693:C:G	2.24847e-05	0.0100181
ENSG00000251369_rs113555976:58105749:T:TAA	0.0125121	0.0489272
ENSG00000253276_rs342257:106349853:G:C	0.00370333	0.540722
ENSG00000254614_rs3953797:64948277:A:C	0.00140349	0.184594
ENSG00000254635_rs10675987:28842192:A:ATAAT	0.00140906	0.524086
ENSG00000254682_rs2040323:71172783:A:C	6.67107e-06	0.000233256
ENSG00000257497_rs3858535:75816507:C:T	2.75825e-06	4.71263e-05
ENSG00000258289_rs10133054:65404116:C:G	7.59738e-07	2.54139e-06
ENSG00000260708_rs5769138:47157221:G:C	0.00350663	0.000452015
ENSG00000261189_rs1322219	0.00439297	0.637068
ENSG00000261455_rs13231575:151252088:G:A	0.0126504	0.518042
ENSG00000262879_rs369578463:45097024:G:C	0.00392388	0.120197
ENSG00000263753_rs11877479:5245228:C:T	0.000979192	0.00138972
ENSG00000264247_rs12327049:72260234:T:C	1.55091e-05	0.000810016
ENSG00000269973_rs2245344:9985670:T:C	0.000149258	0.00420124
ENSG00000270696_rs6747017:75857547:G:A	3.55393e-05	0.000277017
ENSG00000272047_rs2018114:159219656:T:G	0.0420488	0.446044
ENSG00000273038_rs34351891:32969355:CT:C	0.000329435	7.44301e-06
ENSG00000273270_rs12673060:128215715:T:G	0.0247652	0.00094922
ENSG00000273311_rs2800970:19093033:T:C	0.00172641	2.00388e-08
ENSG00000001631_rs728486:91296669:G:A	0.864318	0.00507055
ENSG00000004777_rs809418:36266822:A:G	0.307478	0.0210676
ENSG00000005001_rs9933233:2936219:A:T	0.184712	0.0421606
ENSG00000005194_rs223858:57480654:C:A	0.839613	0.00861177
ENSG00000006607_rs77869830:242022736:G:T	0.756646	0.00625619
ENSG00000010626_rs3741921:7016449:C:T	0.674525	0.0101665
ENSG00000011143_rs57475423:55770184:T:C	0.586982	0.0372653
ENSG00000011405_rs664382:17206519:A:T	0.769753	0.0105156
ENSG00000011426_rs6462672:36414158:A:T	0.196215	5.56704e-08
ENSG00000012983_rs2356249:50928417:T:C	0.0709489	0.00226605
ENSG00000013275_rs11669599:41169294:C:A	0.568352	0.00735536
ENSG00000013364_rs3976455:29861447:G:A	0.280227	0.0163212
ENSG00000013374_rs45503095:150559577:C:T	0.222364	0.00149379
ENSG00000013441_rs13398626:202133374:G:A	0.838818	0.0427747
ENSG00000013573_rs4931345:30655661:A:G	0.802294	0.0402466
ENSG00000020922_rs544336:95107793:T:C	0.300908	0.0417283
ENSG00000022976_rs45443993:102680164:G:A	0.850334	0.0399683
ENSG00000023191_rs67092853:510980:A:G	0.20989	0.00655996
ENSG00000029639_rs1331212:155575431:C:T	0.190343	4.22055e-05
ENSG00000030110_rs210134	0.194258	0.0281469
ENSG00000044090_rs57701001:43032681:G:A	0.182091	0.0474946
ENSG00000044459_rs10963014:17295633:G:C	0.335783	0.0494064
ENSG00000047621_rs11062841:3922266:C:T	0.236404	0.0290163
ENSG00000054983_rs28533072:88470978:C:T	0.156195	0.00761268
ENSG00000055732_rs35369217:85443959:CA:C	0.147777	0.0125181
ENSG00000056586_rs10540015:125622684:CTT:C	0.609444	0.00729946
ENSG00000057608_rs1707228:5921537:G:T	0.56524	0.0174888
ENSG00000060642_rs71636775:27082971:A:C	0.615251	0.0492813
ENSG00000065328_rs1926822:14148767:C:T	0.935459	0.00379113
ENSG00000065600_rs11119884	0.0606162	0.00137745
ENSG00000065615_rs2324476:84521055:T:C	0.434338	5.73853e-05
ENSG00000065621_rs2282326:106020398:A:C	0.143666	0.00235461
ENSG00000066855_rs1514522:66286433:A:G	0.779872	0.030094
ENSG00000067208_rs11807271:92155615:T:C	0.466857	0.00747443
ENSG00000068305_rs12913223:100352463:T:C	0.188893	0.0165112
ENSG00000069974_rs1915203:55136335:C:T	0.741171	0.0392219
ENSG00000070061_rs12343289:110912793:T:C	0.495469	0.00668993
ENSG00000070770_rs11647124:58281305:T:G	0.635583	0.0262787
ENSG00000071054_rs62156093:101457506:A:G	0.841296	0.00259307
ENSG00000072803_rs6867969:172224810:A:G	0.703497	0.0203396
ENSG00000072864_rs56124315:15844975:GTAT:G	0.152146	0.0166775
ENSG00000073350_rs7502603:73538776:C:A	0.580362	0.0405033
ENSG00000073711_rs73227919:135129566:C:T	0.869892	0.0127381
ENSG00000073921_rs138171974:86379330:CTT:C	0.773822	0.0153604
ENSG00000075131_rs7166955:66427048:C:G	0.642751	0.00114532
ENSG00000075234_rs11090858:46677997:G:A	0.496728	3.84362e-05
ENSG00000075413_rs11850264:104578817:G:A	0.588082	0.0128484
ENSG00000077454_rs6966570:100695058:T:C	0.6403	0.00724424
ENSG00000078043_rs11663074:45023793:T:C	0.69445	0.00726417
ENSG00000078142_rs148362108:39693819:TTTGCATATCTGTTCAAGGCTTC:T	0.224024	0.0234792
ENSG00000078177_rs186088480:40127464:G:A	0.709853	0.0170285
ENSG00000078319_rs11760747:100732321:C:T	0.862336	0.0490941
ENSG00000081320_rs16841191:196316701:T:G	0.107175	0.0498911
ENSG00000083123_rs35256380:81756435:G:A	0.84702	0.00713619
ENSG00000083535_rs7983493:73313825:G:T	0.425757	0.0182229
ENSG00000085719_rs116990669:88380376:C:T	0.0537759	0.0402636
ENSG00000085832_rs35231913:50845469:GTTT:G	0.731953	0.0318686
ENSG00000085978_rs11891546:234232722:T:G	0.068608	0.0153251
ENSG00000091542_rs2746025:18151611:C:A	0.0723809	0.000596103
ENSG00000091622_rs34536093:6371780:T:A	0.675509	0.0208559
ENSG00000092036_rs7157511:22608305:C:A	0.505778	0.00887202
ENSG00000095485_rs11190234:101429593:G:A	0.719925	0.00223791
ENSG00000099940_rs5844433:21028319:CTCTT:C	0.595013	0.000634374
ENSG00000100023_rs12170039:22046787:G:A	0.244837	0.00195046
ENSG00000100056_rs397701:20032327:T:C	0.715404	0.0326117
ENSG00000100083_rs735562:37296946:C:G	0.0549161	0.0497035
ENSG00000100109_rs10713457:26066473:GA:G	0.791006	0.036601
ENSG00000100201_rs763121:38879940:A:G	0.288945	0.0158597
ENSG00000100243_rs11090113:43054490:A:G	0.0707488	0.0119418
ENSG00000100347_rs139245:44619335:T:G	0.696457	0.0339797
ENSG00000100376_rs714022:46175530:A:C	0.776905	0.0144294
ENSG00000100417_rs9611610:41949259:A:G	0.121071	0.00102499
ENSG00000100554_rs145780940:68144059:TTTTG:T	0.688637	0.00831624
ENSG00000100629_rs3783943:81471446:A:G	0.594325	0.0316459
ENSG00000100842_rs2231806:23828893:G:A	0.580025	0.000128568
ENSG00000100926_rs4982983:25143198:A:G	0.403411	0.0241444
ENSG00000100994_rs34348191:25210313:G:C	0.157584	4.25766e-05
ENSG00000101132_rs1877430	0.668778	0.0113527
ENSG00000101182_rs1557183	0.424068	0.0418372
ENSG00000101290_rs6053183:5165145:T:C	0.684268	0.00968147
ENSG00000103044_rs73612697:68162016:G:A	0.932998	0.0441973
ENSG00000103199_rs11864857:5792823:A:T	0.186218	0.00117577
ENSG00000103356_rs35947720:23522639:ATT:A	0.158098	5.74328e-05
ENSG00000103978_rs115718693:41783388:T:C	0.91537	0.0201369
ENSG00000104518_rs12541647:144647928:T:C	0.51232	0.00419358
ENSG00000104529_rs72695721:144319478:C:A	0.72757	0.0183681
ENSG00000104635_rs7834063:22184881:C:T	0.11214	0.0064135
ENSG00000104774_rs1133330	0.695827	0.00197511
ENSG00000104812_rs11083925	0.673987	0.0473123
ENSG00000104969_rs4807380	0.365357	0.0304525
ENSG00000105063_rs35682835:55011101:G:C	0.793328	0.000891155
ENSG00000105136_19:58036891:T:A	0.443984	0.00515743
ENSG00000105404_rs12973823:41641110:A:G	0.73776	0.0211715
ENSG00000105618_rs3810244	0.550102	0.00279046
ENSG00000105971_rs17308500	0.654904	0.0199844
ENSG00000106080_rs6944596	0.713234	0.0169504
ENSG00000106404_rs10215699:100862768:C:T	0.448144	0.000469486
ENSG00000106479_rs12530738:149049409:G:A	0.824191	0.0390331
ENSG00000106554_rs2278816	0.793649	0.0242667
ENSG00000106780_rs10985007:123491675:A:C	0.0601478	0.00101523
ENSG00000107625_rs10762294:71170381:T:C	0.129701	0.0026314
ENSG00000107669_rs1322323:123950227:G:A	0.410502	0.0413305
ENSG00000108406_rs4268817:57527470:A:C	0.876455	0.0341248
ENSG00000108443_rs8066241:58157149:T:C	0.887285	0.0271038
ENSG00000108561_rs112438463:4673552:C:CA	0.83749	0.00330577
ENSG00000108846_rs9898910	0.847862	0.0169754
ENSG00000108848_rs11657022:49549494:T:G	0.679114	0.0299546
ENSG00000108861_rs111911683:41858721:CT:C	0.546685	0.00691943
ENSG00000109790_rs2566114:39052210:A:G	0.0828835	0.00569752
ENSG00000110063_rs2226935:126630431:C:T	0.199405	0.0136817
ENSG00000110080_rs11220466:126258862:G:A	0.32157	0.0489668
ENSG00000110274_rs2305826:117241760:T:A	0.367079	0.035311
ENSG00000110651_rs16928079:2320558:C:T	0.434025	0.0365218
ENSG00000110696_rs12276879:15873509:A:G	0.80808	0.0249164
ENSG00000110906_rs6606729:109952925:A:C	0.215218	0.00264134
ENSG00000111328_rs12824685:123817569:G:T	0.0923658	0.0021464
ENSG00000111530_rs3052232:68279279:A:AAC	0.0968653	0.0181767
ENSG00000111554_12:69170840	0.894735	0.0323613
ENSG00000111596_rs7486501:70431900:A:G	0.439083	0.0456596
ENSG00000111670_rs10860776:102097078:G:C	0.344839	0.00142943
ENSG00000111707_rs7968371:118849509:C:T	0.197822	0.0017888
ENSG00000111725_rs5801294:119180824:CT:C	0.455227	0.0405025
ENSG00000111790_rs11049229:28089820:A:T	0.639608	0.00314457
ENSG00000112234_rs12189679:98333409:G:A	0.776835	0.0048798
ENSG00000112357_rs7759040:137517491:A:T	0.656065	0.0213354
ENSG00000112742_rs2629474:80162563:C:A	0.630167	0.0438127
ENSG00000113441_5:97234608:C:G	0.646081	0.0294636
ENSG00000113734_rs1982065:171863552:T:C	0.183466	0.0110997
ENSG00000114573_rs113977119:112884242:G:GT	0.582656	0.0328048
ENSG00000115590_rs7584650:101703771:A:G	0.774539	0.0284649
ENSG00000115902_rs7566124:65224470:G:T	0.728779	5.42214e-05
ENSG00000115944_rs13020622	0.0643117	0.00266458
ENSG00000116032_rs10403909:1008358:A:G	0.118878	0.0384506
ENSG00000116688_rs11577895:12056945:A:C	0.535816	0.0348136
ENSG00000117151_rs7552393:84254551:A:G	0.595489	0.000436715
ENSG00000117411_rs1766966:44382515:A:G	0.671355	0.0197836
ENSG00000118217_rs35375131:161813079:CT:C	0.502399	0.025222
ENSG00000118402_rs103195:80569987:T:A	0.148956	0.0243975
ENSG00000118579_rs59163650:18389100:C:T	0.766014	0.0043898
ENSG00000119718_rs4899552:75667921:C:A	0.0526864	0.000487673
ENSG00000119760_rs74450311:27754625:CAT:C	0.611239	0.0258573
ENSG00000120008_rs10788127:122664694:G:A	0.208139	0.00550958
ENSG00000120071_17:44259792:G:A	0.11251	0.0173407
ENSG00000120539_rs6482601:27464600:T:C	0.671203	0.0454626
ENSG00000120694_rs12429503:31726557:T:C	0.11783	0.0460526
ENSG00000120733_rs2240331:137780368:C:A	0.451578	0.0241723
ENSG00000120910_rs7828610:22307326:C:T	0.172359	0.000532502
ENSG00000121644_rs34304194:245129972:A:AT	0.8896	0.0071996
ENSG00000122042_rs3858734:29579059:A:G	0.275673	0.0447626
ENSG00000122550_rs76349338:23748757:C:T	0.564685	0.0332604
ENSG00000122741_rs111615516:37810460:C:T	0.327398	0.0208601
ENSG00000123191_rs747781	0.298032	0.0388558
ENSG00000123815_rs199591654:41160545:CAAA:C	0.681015	0.0290336
ENSG00000124006_rs72951802:220006130:G:A	0.69891	0.00687958
ENSG00000124299_rs60199045:33917811:G:A	0.284368	0.0129034
ENSG00000124508_6:26709590:T:TC	0.915728	0.000478811
ENSG00000124920_rs139937518:61513671:CAGAG:C	0.166736	0.0475582
ENSG00000125445_rs146993323:73041758:T:TTA	0.620904	0.0369187
ENSG00000125630_rs11689338:113312117:A:G	0.0529361	0.000268361
ENSG00000125818_rs139223274:1504846:T:TG	0.70572	0.0290964
ENSG00000125826_rs2145069:381191:T:C	0.726871	4.97247e-06
ENSG00000126775_rs4898848:55196586:T:G	0.421295	0.0151604
ENSG00000126790_rs74060153:60794488:T:A	0.903202	0.0108971
ENSG00000126822_rs112764916:64257745:G:A	0.895062	0.0182548
ENSG00000127463_rs10799710:19483209:A:G	0.300151	0.00384314
ENSG00000127616_rs12610607:11084994:A:G	0.403084	0.000346021
ENSG00000127663_rs12610785:5410105:G:A	0.830327	0.0482501
ENSG00000127946_rs4385415	0.396964	0.0420875
ENSG00000128274_rs17003680:43756864:A:G	0.276673	0.0263409
ENSG00000128563_rs112619356:101166865:C:T	0.745531	0.039328
ENSG00000128694_rs16830973:189849330:A:G	0.481796	0.0153509
ENSG00000128699_rs6741074:190597241:G:T	0.706258	0.0451307
ENSG00000128791_rs7229150	0.377952	0.0145025
ENSG00000129354_rs4804503:10567890:C:T	0.550291	0.0496717
ENSG00000129646_rs34291625:73439907:A:G	0.953423	0.00181516
ENSG00000130414_rs2369058:241038705:G:A	0.163729	0.029892
ENSG00000131165_rs9937322:89735923:G:C	0.563097	0.0077624
ENSG00000131196_rs8091180	0.372121	0.0323103
ENSG00000131558_rs2346453:133750833:A:G	0.51162	0.0256479
ENSG00000131845_rs10416949:57250100:A:C	0.854651	0.0413939
ENSG00000132017_rs12981251:14742587:G:A	0.855982	0.0404228
ENSG00000132199_rs12960515:684048:C:T	0.0711933	0.0139162
ENSG00000132305_rs35901635:86378043:ATT:A	0.258294	2.33466e-05
ENSG00000132359_rs7207487	0.804048	0.0417433
ENSG00000132388_rs4790255:5150342:C:T	0.376972	0.0302926
ENSG00000132670_rs8124504:3666685:A:T	0.685211	0.00495937
ENSG00000132694_rs6679793:157514097:A:G	0.594649	0.0364594
ENSG00000132842_rs6859202:77552890:T:A	0.462074	0.0177855
ENSG00000133028_rs73287629:10602967:G:A	0.223306	0.000893596
ENSG00000133103_rs76323716:39325788:G:A	0.733029	0.0288778
ENSG00000133195_rs10852744:71143527:T:G	0.831154	0.0481695
ENSG00000133612_rs76357939:151525420:C:T	0.320492	0.0101116
ENSG00000134779_rs4799429:34302276:C:T	0.612856	0.0243913
ENSG00000135063_rs7033121:71967943:T:C	0.102784	0.0136538
ENSG00000135387_11:34456188	0.168962	0.0498183
ENSG00000135390_rs11170566:53907067:C:T	0.457693	0.0101149
ENSG00000135775_rs10864739:230448072:G:T	0.236164	0.0427695
ENSG00000135912_rs67527046:219615878:CTCATGTTTGGCTCTG:C	0.254375	6.31674e-05
ENSG00000136156_rs1924802:48337637:G:C	0.06091	0.0467208
ENSG00000136261_rs10676857:17377898:C:CTT	0.601327	0.0345222
ENSG00000136270_rs1357111:45684544:G:A	0.803193	0.00160629
ENSG00000136485_rs2429427:61393816:G:A	0.366175	0.0311493
ENSG00000136758_rs2050443:26639471:T:C	0.450458	0.0323417
ENSG00000136856_rs3802364:130166957:T:C	0.10402	0.000202257
ENSG00000136935_rs10818999:127613206:C:T	0.583994	0.0444282
ENSG00000137094_rs1328536:34505481:C:T	0.80718	0.0450927
ENSG00000137145_rs76220615:19580964:T:G	0.438885	0.00330217
ENSG00000137760_rs10502076:106570055:A:C	0.653879	0.0217948
ENSG00000138078_rs698777:44740613:C:G	0.0529495	0.0181619
ENSG00000138175_rs3824778:105394452:C:T	0.66394	0.0188213
ENSG00000138311_rs2893898:64150773:C:T	0.144235	0.0163149
ENSG00000138660_rs4834221:113073699:G:A	0.601079	0.0342748
ENSG00000138698_rs145469468:99321312:T:TA	0.754386	0.000822721
ENSG00000138758_rs7690648:77455314:C:G	0.534512	0.000801799
ENSG00000139624_rs61928280:50650041:A:C	0.199611	0.0332976
ENSG00000139668_rs1885854:52313195:C:T	0.173949	0.0269535
ENSG00000139684_rs7998879:46360749:T:C	0.130705	0.00181495
ENSG00000140829_rs2133773:71812296:A:G	0.836304	0.0200063
ENSG00000140832_rs2432524:71584333:G:T	0.109082	0.0135223
ENSG00000141401_rs584373:11974971:T:C	0.946338	0.0170877
ENSG00000141556_rs1551627:80875626:C:G	0.255446	0.0274404
ENSG00000141562_rs114494328:80455243:T:G	0.642099	0.032626
ENSG00000141580_rs9912335	0.345327	0.0031577
ENSG00000141994_rs10811:5786815:G:A	0.0505044	0.000992153
ENSG00000142207_rs762174:33832942:C:T	0.0562607	0.000499314
ENSG00000142444_rs2304256	0.709097	0.000577624
ENSG00000143156_rs3917793:169567545:C:A	0.36742	0.000120273
ENSG00000143324_1:181238831:C:CT	0.378153	0.0420415
ENSG00000143344_rs6659603:183794528:G:A	0.340636	0.0165901
ENSG00000143740_rs1398859:227399797:T:G	0.180674	0.0301813
ENSG00000143801_rs3014267:227552917:G:A	0.868984	0.0281065
ENSG00000143951_rs113905588:63960525:A:G	0.944972	0.0082273
ENSG00000144043_rs79704315:70778590:T:G	0.829967	0.000561886
ENSG00000144224_rs1529396:137467995:C:A	0.205621	0.0131759
ENSG00000144455_rs2819560:4404087:A:G	0.087874	0.00139612
ENSG00000144580_rs832801:219488698:G:A	0.238119	0.027302
ENSG00000144647_rs4683355:43145671:C:T	0.301324	0.0449521
ENSG00000145348_rs140256119:107135163:T:C	0.156417	6.92867e-05
ENSG00000145740_rs145146764:68351952:GTT:G	0.614024	0.0344486
ENSG00000146223_rs4714572	0.793829	0.00484569
ENSG00000146918_rs7778091:158451907:A:G	0.436066	0.0148416
ENSG00000147535_rs10112856:38049439:G:A	0.843024	0.00111347
ENSG00000147642_rs150015279:110748691:T:TTC	0.0756424	0.0219661
ENSG00000147689_rs9987352:124187377:T:C	0.4999	0.0459298
ENSG00000148110_rs7045506:96414866:C:T	0.664437	0.0180095
ENSG00000148153_rs786963:115447935:T:C	0.327186	0.0211292
ENSG00000149196_rs116390962:86186449:T:G	0.360186	0.0420331
ENSG00000149269_rs3019249:77175444:T:C	0.0988628	0.037361
ENSG00000149328_rs12180	0.265043	0.00162395
ENSG00000149418_rs145626041:130065746:TCA:T	0.734937	0.00536612
ENSG00000149499_rs2509970:62188855:C:G	0.863661	0.000261541
ENSG00000149554_rs73616081:125559759:G:C	0.0580653	4.39916e-05
ENSG00000149679_rs2427316:60974208:A:G	0.142119	0.0426561
ENSG00000150630_rs6846419:177807846:A:G	0.475195	0.0115251
ENSG00000150753_rs1428945	0.300147	0.0145953
ENSG00000151135_rs7296460:107521770:T:G	0.670805	0.00447366
ENSG00000151229_rs11170975:39567945:C:T	0.753611	0.00063262
ENSG00000151376_rs10219378:86339724:C:T	0.680473	0.00346845
ENSG00000151502_rs1939728:134547554:A:C	0.662008	0.0257324
ENSG00000152082_rs78562006:130584817:T:A	0.644835	0.018481
ENSG00000152404_rs55982480:107137727:GAA:G	0.0535151	0.00139615
ENSG00000152684_rs11740124:52710955:C:T	0.747272	0.00332607
ENSG00000153037_rs149117562:112804201:A:T	0.588331	0.00128358
ENSG00000154001_rs1255955:64549024:A:G	0.883019	0.0416753
ENSG00000154124_rs148490437:15096715:T:C	0.790654	0.0376113
ENSG00000154719_rs1537087:26964828:G:A	0.376326	0.000111386
ENSG00000154832_rs1443624:47889877:C:T	0.709211	0.00872508
ENSG00000155561_rs4487699:135306504:A:G	0.453889	0.0254481
ENSG00000155893_rs73872725:141144431:G:A	0.926627	0.0251336
ENSG00000156603_rs624759:57642126:T:C	0.753121	0.0336127
ENSG00000156875_rs7364413:100417765:A:G	0.0807193	0.0312017
ENSG00000156931_rs72497187:185286494:T:G	0.771419	0.0339403
ENSG00000157181_rs10752991:186972935:A:C	0.678191	0.0484178
ENSG00000157450_rs7169509	0.891184	0.00772591
ENSG00000157827_rs10179385:153288972:T:C	0.214812	2.77032e-05
ENSG00000159267_rs35868871:38331089:CA:C	0.084075	1.31765e-06
ENSG00000159322_rs8023703:72504059:G:A	0.400455	0.0472381
ENSG00000159596_rs66462608:46674250:C:T	0.689912	0.0434061
ENSG00000160058_rs17495262:31837632:C:T	0.390973	0.0333602
ENSG00000160193_rs1547239:45138200:T:C	0.625757	0.00862571
ENSG00000160294_rs2839217:47766650:G:A	0.120323	0.0318342
ENSG00000160392_rs71171543:40646900:C:CA	0.885394	0.00468829
ENSG00000160563_rs7868108:134025283:G:C	0.843108	0.0126191
ENSG00000161204_rs34611203:183817972:A:G	0.368567	0.0380515
ENSG00000161265_rs138690089:36158379:C:T	0.432393	0.044546
ENSG00000161914_rs4804533:10901833:C:T	0.905127	0.0187267
ENSG00000162076_rs34076655:2920475:C:T	0.0709538	0.0131428
ENSG00000162384_rs12568646:53448431:A:G	0.257085	0.0490819
ENSG00000162688_rs35677289:100205774:GA:G	0.397859	0.00953028
ENSG00000162777_rs325923:111691513:G:A	0.423681	0.000963505
ENSG00000163002_rs1806531:184070364:A:G	0.353031	0.00426446
ENSG00000163251_rs796279:209027871:A:G	0.848015	0.0464725
ENSG00000163406_rs1344279:121615679:G:A	0.157638	0.00894588
ENSG00000163412_rs71298399:71767380:A:T	0.469335	0.0347065
ENSG00000163597_rs3744050	0.367375	0.040217
ENSG00000163803_rs17741386:28780282:C:T	0.692674	0.0375089
ENSG00000163913_rs4128193:129143091:G:T	0.423267	0.00510424
ENSG00000163956_rs10937930	0.392045	0.00012819
ENSG00000164048_rs34271472:48346866:AT:A	0.159912	0.00200833
ENSG00000164099_rs139877959:118345702:AG:A	0.96199	0.00249811
ENSG00000164308_rs2910686:96252589:T:C	0.991163	0.00840184
ENSG00000164346_rs574841:73266946:A:G	0.210311	0.00763752
ENSG00000164366_rs6554798:153188:T:C	0.544519	0.0018924
ENSG00000164466_rs10053715:174251072:T:C	0.306109	0.0480221
ENSG00000164576_rs148227624:153889699:C:CT	0.800896	0.00390892
ENSG00000164828_rs5881883:820559:A:AG	0.813314	0.0439349
ENSG00000164934_rs3134254:104420100:T:C	0.226575	0.0313755
ENSG00000164976_rs11422359:34263736:A:ATT	0.832173	0.0134541
ENSG00000165060_rs7870657	0.423904	0.0126298
ENSG00000165494_rs4595568:82302149:A:G	0.420871	0.0376812
ENSG00000165637_rs11001294:76867309:C:T	0.117495	0.000963062
ENSG00000165929_rs200263042:92115845:CT:C	0.308174	7.48025e-05
ENSG00000166024_rs2487896:100802380:G:A	0.311975	0.00453893
ENSG00000166037_rs519265:95872417:A:G	0.18181	0.0380734
ENSG00000166140_rs62002493:40147127:C:T	0.607665	0.0412801
ENSG00000166181_rs3781803:43439363:C:T	0.210223	0.0472979
ENSG00000166224_rs112580138:72557759:C:T	0.767456	0.00393899
ENSG00000166260_rs4573987:53001726:C:T	0.261137	0.0035479
ENSG00000166396_rs72935034:62176283:T:C	0.489313	3.42313e-05
ENSG00000166479_rs77202769:67108558:T:C	0.0868902	0.0108901
ENSG00000166582_rs3112526:16247100:T:C	0.722518	0.0155688
ENSG00000166821_rs2289487	0.588938	0.0156082
ENSG00000166860_rs775245:57974670:G:A	0.704771	0.0190646
ENSG00000167114_rs3765602:130287287:C:A	0.678075	0.0335005
ENSG00000167220_rs2684816	0.11972	0.0105325
ENSG00000167468_rs757229:1102114:G:C	0.175821	0.00429735
ENSG00000167491_rs75357755:19032224:G:T	0.676322	0.0445119
ENSG00000167555_rs4802984:53196202:C:T	0.6596	0.0308151
ENSG00000167562_rs28457732:53064536:A:G	0.313285	0.00534447
ENSG00000167644_rs8101488:38825094:A:G	0.152793	0.000486339
ENSG00000167645_rs75349505:38793073:C:G	0.31766	0.00147099
ENSG00000167653_rs2976391:143762724:C:A	0.819165	0.000170467
ENSG00000167720_rs1466389:2096384:C:T	0.111743	9.17565e-08
ENSG00000167792_rs2126719:67390240:C:T	0.304924	0.0433686
ENSG00000167842_rs73973808:5394090:G:T	0.275295	0.0410498
ENSG00000168143_rs980821:54854439:T:C	0.63646	0.00508647
ENSG00000168275_rs10429824:234512593:A:T	0.111422	0.00758425
ENSG00000168564_rs10029290	0.579462	0.0462722
ENSG00000168826_rs2172443:4819565:A:G	0.648425	0.0116536
ENSG00000168899_rs1446669:85762209:T:C	0.0613748	0.0314723
ENSG00000168961_rs2779248	0.998446	0.000958691
ENSG00000168994_rs408603:4656073:T:G	0.785536	0.0364596
ENSG00000169062_rs7332374:114995733:T:C	0.328099	0.000110744
ENSG00000169288_rs145815898:78811157:A:G	0.470716	0.00627393
ENSG00000169469_rs310124:153020275:C:T	0.245652	0.0436146
ENSG00000169474_rs6665575:152960506:G:A	0.206178	0.000860514
ENSG00000169567_rs57813127:130517090:T:TTA	0.758331	0.0258435
ENSG00000169689_rs111669968:80107134:TG:T	0.877914	0.00291675
ENSG00000170027_rs116701545:76049516:A:G	0.14601	0.0067411
ENSG00000170209_rs1554929:113278764:C:T	0.857303	0.0251659
ENSG00000170270_rs17129431:94497896:G:T	0.791109	0.0441874
ENSG00000170903_rs2513614:106301973:A:C	0.757981	0.000316059
ENSG00000171204_rs57969352:86122472:T:C	0.876973	0.0066174
ENSG00000171421_rs62338062:1824353:G:A	0.0932702	0.00192493
ENSG00000171503_rs6856561:159621185:A:T	0.381631	0.0105091
ENSG00000171763_rs12593371:45640084:G:A	0.15282	0.00153825
ENSG00000172301_rs56362439:30253140:T:A	0.871694	0.00931407
ENSG00000172613_rs10896281:67743966:T:C	0.665013	0.0244874
ENSG00000172728_rs11293355:33372452:TG:T	0.728906	3.60622e-06
ENSG00000172878_rs2258180:173686663:G:T	0.723296	0.0239867
ENSG00000173141_rs9550807:22607046:C:T	0.714246	0.0147199
ENSG00000173218_rs1286364	0.393919	0.0449283
ENSG00000174130_rs17429224	0.191062	0.00966593
ENSG00000174780_rs11396759:57311438:G:GT	0.26766	0.00014796
ENSG00000174989_rs12299065:117442304:G:A	0.604928	0.00621896
ENSG00000175567_rs74635683:73377955:C:T	0.987653	0.0371026
ENSG00000176024_rs11668015:53115233:C:T	0.756524	0.0237185
ENSG00000176593_rs1014767	0.75159	2.05995e-06
ENSG00000176658_rs4296307	0.427949	0.00854826
ENSG00000177030_rs2334551:1511404:C:A	0.722807	0.00103726
ENSG00000177425_rs143587076:80542471:G:C	0.846925	0.0258523
ENSG00000177963_rs1060819:295527:T:C	0.649965	0.0182826
ENSG00000178057_rs58582477:48249597:G:A	0.964801	0.00400163
ENSG00000178802_rs936226:75069282:C:T	0.0517968	0.00633527
ENSG00000178950_rs1680074:1279621:G:A	0.309243	0.00076721
ENSG00000180190_rs1448087:469429:A:C	0.100131	0.0274824
ENSG00000180263_rs371946021:95338049:GC:G	0.720201	0.0364337
ENSG00000180626_rs8064959:5277729:A:T	0.770536	0.0370332
ENSG00000180787_rs112362507:5020613:C:A	0.963059	0.00496183
ENSG00000180992_rs6883:44081718:G:A	0.344822	0.0120249
ENSG00000181085_rs4072459	0.296577	0.0416729
ENSG00000181126_rs1611139:29799116:G:T	0.345077	2.58516e-06
ENSG00000181894_rs13345233	0.74791	0.0299581
ENSG00000183723_rs8057020:65701838:T:A	0.888278	0.0320762
ENSG00000184743_rs59611719:63830103:AC:A	0.827861	0.0459394
ENSG00000185019_rs73075045:3152261:G:A	0.460421	0.0460366
ENSG00000185115_rs59913767:29286525:C:T	0.913504	0.0039114
ENSG00000185127_rs3012370:170455499:G:T	0.685548	0.0380155
ENSG00000185344_rs2333838:124220354:A:C	0.148719	2.04186e-10
ENSG00000185561_rs1056292:1204124:C:T	0.918828	0.0124298
ENSG00000186807_rs4342964:48318619:C:T	0.481786	0.0415598
ENSG00000187676_rs9546375:31951028:T:C	0.750006	0.00216647
ENSG00000187778_rs73305168:50865409:C:T	0.2172	0.0100882
ENSG00000188242_rs61079366:175142:C:T	0.950123	0.0394314
ENSG00000188707_rs60467296:150015471:G:A	0.115749	0.00151705
ENSG00000196214_rs656541:53039361:T:A	0.531932	0.0105727
ENSG00000196367_rs7803996:97888360:T:C	0.921161	0.0140701
ENSG00000196391_rs1452408:90891117:A:C	0.196598	0.00195611
ENSG00000196455_rs17749933:130493106:C:A	0.225803	0.00957126
ENSG00000196715_rs10807707:66314113:G:A	0.673356	0.0466783
ENSG00000197062_rs11965137:27624749:G:A	0.943381	0.00685378
ENSG00000197329_rs7850:65249922:C:A	0.371261	0.0430133
ENSG00000197713_rs3770688:211334073:C:T	0.32228	0.0325398
ENSG00000197774_rs2235649:1837406:C:T	0.684761	0.0152063
ENSG00000197863_rs35639012:37716859:C:CT	0.473574	0.0109338
ENSG00000197912_rs3114890:89449546:C:G	0.467607	0.000201962
ENSG00000197958_rs4837150:130168867:G:A	0.0623559	9.58783e-07
ENSG00000197969_rs72740386:79787117:G:A	0.0608	0.0115514
ENSG00000198146_rs3809514:35048352:A:G	0.730837	0.00683717
ENSG00000198356_rs8106749:12278564:G:C	0.129431	0.025472
ENSG00000198453_rs1667336:37465949:G:A	0.519248	0.000873035
ENSG00000198853_rs11541908:35705759:G:A	0.640212	0.0365042
ENSG00000198954_rs3998302:71413584:CGT:C	0.243501	4.61653e-05
ENSG00000203722_rs1334510:150201179:A:G	0.706886	1.00119e-05
ENSG00000204147_rs12359318:53323004:G:A	0.85647	0.0139425
ENSG00000204209_rs3021303:32575746:G:T	0.52432	0.00556658
ENSG00000204305_rs3130048:31613739:T:C	0.14323	0.000854203
ENSG00000204348_rs2071536:32821447:C:T	0.571805	0.0104761
ENSG00000204540_rs3909109:31096367:A:G	0.995911	0.00129271
ENSG00000205084_rs149973516:75585977:C:CAT	0.220862	0.0287729
ENSG00000205268_rs11775119:67203266:T:C	0.789545	0.040933
ENSG00000205885_rs7294478	0.602493	2.46424e-05
ENSG00000211450_rs2960562:56929872:G:T	0.982791	0.0062426
ENSG00000212978_rs6716729:60583518:C:A	0.587516	0.0455647
ENSG00000214049_rs138510193:15928869:TA:T	0.996882	4.25778e-05
ENSG00000214174_rs11656396:63046076:T:C	0.863501	0.00721088
ENSG00000214944_rs1981809	0.350535	0.00532307
ENSG00000215012_rs77701849:19828820:T:C	0.0817976	0.00635826
ENSG00000220205_rs62069344:9015046:G:T	0.878964	0.0111142
ENSG00000221990_rs58779816:428348:A:G	0.407661	0.0455532
ENSG00000225383_rs11256836:10835220:T:C	0.106799	0.0027935
ENSG00000226688_rs4918717:96652787:T:C	0.619348	0.0194429
ENSG00000226742_rs8083990:77722378:G:A	0.0546935	0.00589842
ENSG00000228300_rs12975875	0.139758	0.00415341
ENSG00000230513_rs4820722:21363240:C:T	0.563417	0.00154242
ENSG00000230551_rs4705375:149151448:A:T	0.977458	0.00859506
ENSG00000231074_rs28360035:30319538:C:T	0.0598322	0.0135392
ENSG00000232098_rs3764535:58929052:G:A	0.0783867	0.00616688
ENSG00000232559_rs709597:65825983:C:T	0.955258	0.00117778
ENSG00000232677_rs6510541:36857916:T:C	0.29997	0.0498546
ENSG00000234127_rs9261848:30382868:G:C	0.770847	0.0117355
ENSG00000234444_rs7796802:63784122:G:A	0.152612	0.0198716
ENSG00000234741_rs10670475:173217529:A:AGAAG	0.0764143	0.024317
ENSG00000241484_rs8137785:45257747:T:C	0.178509	0.00563955
ENSG00000241852_rs13250356:23359831:G:T	0.27224	0.00123695
ENSG00000242612_rs1204501:465843:A:G	0.480485	0.00990191
ENSG00000243554_rs7784883:97593885:C:T	0.0702029	0.00217323
ENSG00000243566_rs6956929:76002921:T:C	0.853508	0.0270658
ENSG00000247828_rs146611620:87719304:TTTATTATTA:T	0.834671	0.017854
ENSG00000247903_rs142785367:27124528:GATTT:G	0.324403	0.00049506
ENSG00000248049_rs147425774:68535664:TA:T	0.116066	6.17494e-05
ENSG00000248905_rs28576977:33397897:T:A	0.455999	5.5047e-05
ENSG00000253251_rs35226734:64930570:A:AG	0.78368	0.0060754
ENSG00000253982_rs13540:1711275:T:C	0.581631	0.00117758
ENSG00000255455_rs7110591	0.574193	0.0118366
ENSG00000256053_rs11312685:104438642:TA:T	0.87913	0.0459803
ENSG00000256967_rs7294478	0.402174	0.0483334
ENSG00000259153_rs71425385:71261652:C:T	0.0624042	0.000215248
ENSG00000259673_rs3098770:67802571:G:A	0.0982892	3.33618e-06
ENSG00000260404_rs12650532:118808031:C:T	0.919388	0.0292083
ENSG00000260917_rs61872784:114798893:T:A	0.944253	0.0075572
ENSG00000261116_rs4520003:55396500:G:A	0.777609	0.0248668
ENSG00000261801_rs4461027	0.291167	0.0124011
ENSG00000261824_rs12462212:28255137:C:A	0.190745	0.00259976
ENSG00000263072_rs2735537	0.420264	0.0339218
ENSG00000268006_rs74524245:50050261:G:T	0.887188	0.03492
ENSG00000268592_rs58500904:150645206:G:A	0.957477	0.0418565
ENSG00000271122_rs66746302:35670653:A:AT	0.246657	0.00605841
ENSG00000272512_rs2465140:943687:G:C	0.97871	0.00251469
ENSG00000272556_rs200613813:45830485:T:TAA	0.837386	0.0170219
ENSG00000273142_rs4996149:66375019:C:G	0.443001	0.000513755
