# Supplementary material for: Multi-omics colocalization with genome-wide association studies reveals a context-specific genetic mechanism at a childhood onset asthma risk locus
Source: Genome Med. 2021 Oct 10;13:157. doi: 10.1186/s13073-021-00967-y (PMC8504130; doi:10.1186/s13073-021-00967-y)
Supplement: Supplementary file 13 — Additional file 13:. meQTL mash results (lfsr< 0.05). [file 13073_2021_967_MOESM13_ESM.xlsx]

## Sheet: Legend for Additional File 13
Additional File 13 meQTL mash results (lfsr<0.05)

## Sheet: Additional File 13
meqtl	rv.meqtl.lfsr	veh.meqtl.lfsr
cg00000292_rs11645143:28893409:T:C	0.0234183	0.395406
cg00001997_rs11601596:107986691:T:C	0.000755082	0.00147933
cg00002080_rs7280043:30388553:G:A	0.0497674	0.0365928
cg00003965_rs74482639:108479165:G:A	0.0269648	0.000236842
cg00004786_rs13108377	0.000209398	3.56424e-08
cg00004905_rs577869:115999725:A:G	0.043248	0.0250227
cg00014260_rs4406360	0.00311241	0.554271
cg00014333_rs2132702:20134075:G:A	0.0175079	0.198038
cg00019553_rs60900046:95098793:C:T	3.65744e-06	0.078224
cg00022510_rs149278734:155760446:G:GT	0.00104148	0.515348
cg00022866_rs66493355:64108539:C:T	0.0143984	0.0187876
cg00024361_rs11630557:77820712:A:G	3.02481e-10	8.34651e-08
cg00024416_rs11330175:24250072:AG:A	6.51236e-05	0.00564455
cg00024812_rs72775266:9567444:T:C	0.0417369	0.284851
cg00025347_rs10958717:42351585:G:C	0.0194425	0.125547
cg00028507_rs17389607:2917565:C:T	0.0262909	0.0288878
cg00028929_rs17852231:52912870:A:G	0.000103281	0.000203618
cg00030290_rs74498254:8717368:C:CT	0.0120913	4.06455e-07
cg00032195_rs7216662:48937211:A:G	0.00637632	0.546667
cg00032716_rs9646193:41956469:C:T	0.0385137	0.691278
cg00032879_rs2279703	0.00149889	3.59394e-05
cg00034101_rs1180280	0.0398536	0.00774191
cg00034611_rs77942127:89231813:G:GC	0.0131228	0.0057225
cg00036352_rs12679598:144631986:A:G	2.23286e-07	9.48464e-05
cg00037671_rs6084609	0.00219483	0.199474
cg00037986_rs143828529:107020207:TCTC:T	1.92837e-05	0.00407315
cg00040575_rs4279020:18502256:G:T	0.00207799	2.52424e-07
cg00042467_rs9961388:47005371:A:C	0.00255562	0.783555
cg00043076_rs2688234:8447205:C:A	6.15007e-05	0.000620991
cg00043347_rs946673:24611688:A:G	0.0179737	0.0217854
cg00044050_rs918738:11439679:C:G	1.12756e-06	0.000880761
cg00044179_rs78340958:23486453:T:G	0.000565576	0.0102085
cg00047753_rs61482739:8246080:C:G	0.00628174	0.0550856
cg00048149_rs10842708:26474867:G:A	0.000666978	0.00392875
cg00050336_rs6449133:15380277:T:G	0.00628589	0.0388611
cg00050440_rs2806572:23571153:T:A	0.00128122	5.6338e-05
cg00052487_rs58150842:17506684:C:T	2.42509e-11	1.60026e-10
cg00054047_rs228097:43981941:C:T	1.45888e-07	3.19703e-10
cg00055555_rs1413787:29008010:T:C	0.0328453	0.0423597
cg00055603_rs7549671:48512119:C:T	0.000861675	0.354833
cg00056497_rs4462259:134785465:A:G	0.0218296	0.342258
cg00057550_rs7814615:66067608:A:G	7.75583e-05	0.000163124
cg00058288_rs12298990:68409661:T:C	5.50723e-06	0.00147404
cg00058436_rs59100142:76100415:T:TATGTATTC	0.0229509	0.0473941
cg00059225_rs6579913:151306055:G:A	0.0327276	0.728039
cg00060956_rs11581921:43215930:C:T	0.000174412	0.749425
cg00061811_rs3012405:170480687:G:A	0.00104069	1.02918e-07
cg00061907_rs4910157:8941215:A:G	0.000180182	0.0176335
cg00062151_rs7780253:126333583:A:T	0.00612145	0.452666
cg00063456_rs2808590:231523198:C:T	0.0122339	0.0437177
cg00064218_rs4074414:130930794:T:C	0.0350393	0.840181
cg00066151_rs7078407	9.88197e-05	4.46628e-05
cg00066239_rs9896944:78465037:C:T	0.0451189	2.69659e-06
cg00066535_rs58919897:186464883:A:T	0.0443058	0.232716
cg00068174_rs140332452:68152584:C:T	0.0350621	0.000603536
cg00070722_rs306525	0.0261269	0.116253
cg00072478_rs1862478:51029238:T:C	0.0419256	0.722178
cg00073694_rs10920576	0.00773737	0.000383983
cg00074145_rs2456525	0.0298869	0.899467
cg00075383_rs254458:180625254:G:A	0.00833657	0.694526
cg00075422_rs9964257:76662486:G:A	0.0493516	0.448423
cg00075507_rs7212510:26703682:T:A	0.0251232	0.612783
cg00075967_rs148745262:74495555:TTG:T	0.0135402	0.333934
cg00075986_rs78056650:130175774:A:C	0.0408889	0.0725932
cg00076072_rs2424939:31656895:C:T	0.0171562	0.0885716
cg00076543_rs2516697:30232514:G:A	0.000941262	0.0519016
cg00077044_rs11016408:130438264:A:G	0.0357039	0.156795
cg00077264_rs10198483:127934102:G:A	0.0124049	0.306045
cg00078025_rs10817604:117163630:G:A	0.0197201	0.0059132
cg00079477_rs10876980:57785501:C:T	3.59664e-06	0.00212841
cg00080105_rs2524195:30421775:A:G	0.000658047	0.0322131
cg00081602_rs2703634:72918397:A:G	0.000262219	0.748484
cg00082285_rs9442385	0.0377742	0.0169362
cg00084347_rs6488910	0.00047694	0.0314549
cg00085434_rs1553006:14922950:A:G	0.000522607	0.00980591
cg00086283_rs11763040:158416203:G:A	0.00177004	0.00122332
cg00087741_rs56827662:96967541:C:CTA	0.0274666	0.0107731
cg00088916_rs11861089:78019687:T:C	0.0294634	0.121319
cg00090027_rs884700:87894288:T:C	0.0314365	0.0807836
cg00090282_rs12106696:21756553:G:A	0.0466633	0.744865
cg00090431_rs4675790	0.041488	0.45132
cg00092427_rs4984980:968292:G:A	0.0337459	0.697657
cg00092931_rs8044082	0.0132386	0.0370278
cg00093522_rs12081179:2251119:A:G	0.0185561	0.588286
cg00094735_rs10066840:1950343:C:T	1.34163e-06	0.000959153
cg00097715_rs2267005:23461723:A:G	0.00542172	0.704699
cg00098029_rs34671451:187987532:G:A	0.0140453	0.00821949
cg00098286_rs2420319:118412449:G:A	0.0017643	0.282479
cg00098369_rs12700136:19997774:G:A	0.00381533	0.0132546
cg00098692_rs1757071:12879293:G:A	9.03972e-08	5.43554e-08
cg00099788_rs2283134	0.0347267	0.0627621
cg00100804_rs77934993:123844845:C:A	0.0456365	0.0242695
cg00101753_rs11775644:93042425:C:A	0.00326606	0.384331
cg00102023_rs2789:5289887:C:G	0.0495947	0.390379
cg00103134_rs2448967:99130688:C:A	8.61467e-05	0.000538706
cg00106564_rs9406914:277776:C:T	0.00288959	0.00333842
cg00106609_rs4838869:50713371:G:A	2.64802e-06	0.00014921
cg00107631_rs12598211:86737016:A:C	0.000406666	2.75674e-06
cg00108027_rs2981747:124321355:T:C	0.000498904	0.0724065
cg00108722_rs2377513:149934287:A:G	0.0371782	0.136532
cg00108992_rs3851011:12192472:C:A	0.0203856	0.257857
cg00109212_rs6425594:179768464:T:C	0.0417881	0.300041
cg00110081_rs13012155:151355944:C:T	0.0096828	0.0149907
cg00110832_rs3134952:32113571:A:T	0.0328071	0.0438273
cg00111006_rs9659811:232222662:A:G	0.0282724	0.106831
cg00111629_rs772654	1.34161e-08	9.24225e-05
cg00111778_rs199831696:3836379:C:T	0.000551047	0.0402565
cg00114966_rs10801633:197897496:T:C	0.00659802	0.0467513
cg00115747_rs10852779:74943402:T:C	0.0159014	0.00298577
cg00116699_rs35465535:240213519:T:C	0.00104334	0.871779
cg00117532_rs4886918:78104123:T:G	0.01145	0.167592
cg00118868_rs61991826:101711494:C:T	0.000276313	0.00161112
cg00119778_6:32461337:G:<CN0>:32468848	2.40167e-05	0.000140082
cg00119811_rs1565005:73095635:C:T	0.00101267	0.00028583
cg00120880_rs12478876:106288854:C:G	0.0364271	0.230883
cg00121444_rs17072339:4940339:C:T	0.00690103	0.791256
cg00121528_rs117158183:44005886:C:T	1.27147e-05	8.75646e-09
cg00122555_rs12623210:129165496:A:G	8.65816e-05	0.00728164
cg00122854_rs730233:218899633:G:C	0.0272627	0.173085
cg00123090_rs271766:234674802:A:C	0.0143448	0.15511
cg00123622_rs3808613	0.0129977	0.105724
cg00125275_rs2076388:36768309:C:T	0.0140236	0.0203769
cg00126498_rs56363137:150287154:G:C	0.00410491	0.000562577
cg00126638_rs1610679:29791256:C:T	0.020813	0.00015365
cg00126887_rs1960426:1274365:C:T	0.0221245	0.521478
cg00128530_rs12385965:55482759:G:A	0.0032873	0.666578
cg00130707_rs4436786:20293373:C:T	0.0222248	0.657292
cg00131261_rs11986305:142286881:G:A	2.62982e-09	1.62618e-06
cg00132991_rs7102439:12187260:C:T	0.0353945	0.0612738
cg00133283_rs6037895	0.0150033	0.0397356
cg00133811_rs73966656:149793612:A:T	0.0114792	0.336505
cg00133966_rs564749:220575039:C:T	0.00161308	0.550296
cg00133995_rs56119701:16452777:G:A	2.59368e-06	0.80412
cg00134032_rs6593222:55372932:A:C	0.00302472	0.000234581
cg00134415_rs140638004:38857624:CCCT:C	0.0160643	0.025405
cg00135371_rs2492770:134397502:C:G	0.0306594	0.325969
cg00135416_rs8065364	0.0425471	0.709905
cg00135675_rs2424993:33104592:G:C	0.0158307	0.708408
cg00139124_rs11204207:48366391:A:G	0.00601851	0.00514494
cg00139681_rs7797541:106124568:G:A	0.0178759	0.28262
cg00141366_rs2894148:73076098:T:C	7.36471e-07	8.838e-06
cg00141997_rs6726188:28654409:G:C	0.0156891	0.00317037
cg00142239_rs2956912:1512436:G:C	0.00547488	0.250399
cg00142280_rs1609450:91599511:G:A	0.0224387	0.35014
cg00143969_rs4759513:131232982:T:C	0.00170954	0.00221854
cg00145683_rs1110497:51915042:G:A	0.0190346	0.00212201
cg00146756_rs4420983	0.000295219	0.000729205
cg00148355_rs8060914:31546720:G:A	0.026587	0.0858684
cg00148423_rs75063000:86887802:C:CA	0.000640895	0.00443001
cg00150837_rs3836492:52722266:AT:A	0.0138258	9.36222e-05
cg00152047_rs56407270:166902106:G:A	0.0247276	0.151126
cg00152322_rs1684051:65198309:G:C	3.25076e-09	5.95768e-06
cg00154727_rs6963498:50855509:C:T	0.0361677	0.609973
cg00155667_rs8122298:57997049:T:C	0.032753	0.349535
cg00156336_rs72816750:75795727:C:T	0.0436332	0.803391
cg00156947_rs2132852:16517465:A:C	0.00383213	0.706268
cg00158770_rs6980861	0.011289	0.014718
cg00159214_rs7203645:505061:C:A	0.00545142	0.00181779
cg00159953_rs73161620:47549557:A:G	4.13848e-05	0.0498718
cg00166722_rs68067759:10150535:T:C	9.72271e-06	0.000317272
cg00167958_rs86669:42680800:C:T	0.0084417	0.468123
cg00168184_rs3783353:101303637:T:C	3.74672e-06	0.000821317
cg00168706_rs12753328:115685709:C:T	0.000941293	0.000143796
cg00169354_rs6099095:54923762:T:C	0.00409973	0.233714
cg00174447_rs12519587:60086900:C:T	0.0373802	0.216464
cg00174573_rs701089	0.0161941	0.605328
cg00174734_rs2145151:69129780:A:G	9.17684e-07	3.12306e-12
cg00175395_rs13204938	0.0240099	0.00876222
cg00176407_rs1485131:151902730:C:G	0.000265702	4.01039e-07
cg00177313_rs7233727:3414113:T:G	0.0275917	0.128376
cg00178119_rs2511559:105227485:A:C	0.000368904	0.000672229
cg00179576_rs3851730:74485722:G:A	0.0129601	0.33336
cg00181432_rs1773231:194392683:A:C	0.0380545	0.00333509
cg00181669_rs17076257:44006787:C:T	0.00179568	2.60404e-05
cg00182026_rs899321:73280792:C:T	0.0209009	0.844232
cg00182761_rs908830:139840859:T:C	0.00681324	0.929212
cg00183468_rs6781977:142925007:G:A	0.0058612	0.0420288
cg00184372_rs13393159:843487:A:G	0.0196729	0.150087
cg00184953_rs3131018:31143582:A:C	6.71558e-06	0.396319
cg00185413_rs11709544:125922932:C:T	8.0467e-05	0.00428869
cg00185430_rs554052:60956627:G:C	0.0259739	0.350185
cg00185653_rs2293335	0.0261266	0.104071
cg00186954_rs2742519:8933853:T:G	0.00124789	0.00473728
cg00187465_rs72899812:52829348:C:T	0.0493627	0.0149821
cg00192823_rs11791747:137106879:A:G	0.00745828	0.667152
cg00197273_rs4234094:241839423:A:T	0.0094931	0.149757
cg00197452_rs200119540:47781990:A:T	0.00105401	7.22927e-08
cg00200582_rs4742341	1.02693e-05	0.000899831
cg00200734_rs438293:979610:A:T	0.0280174	0.00344063
cg00203409_rs1927125:72782558:T:A	4.02536e-05	8.7055e-06
cg00204262_rs11668179:39316194:C:T	0.00342579	0.0434234
cg00205605_rs6701238:2520500:G:A	0.00276232	0.199867
cg00205913_rs6442409	0.00122612	0.607877
cg00206266_rs6103926:43555996:T:A	0.0127854	0.71784
cg00206277_rs3890294:231158644:A:G	0.0385947	0.371074
cg00206463_rs2517607:30173544:G:A	5.30113e-05	4.93803e-05
cg00207507_rs11206498:55437104:A:G	0.0125457	0.243896
cg00207965_rs9981874:34692388:G:A	0.0382918	2.30636e-06
cg00211069_rs2294321:135253048:T:G	0.0119417	0.0097608
cg00211631_rs17083333:54572066:G:T	0.0158572	0.641549
cg00211882_rs7789	1.80149e-05	0.779523
cg00213112_rs9403317:141859282:A:G	0.00150096	3.85356e-05
cg00215017_rs11146109:134820827:T:C	6.34053e-05	1.23337e-05
cg00216435_rs17101128:143259158:T:C	0.0435848	0.630597
cg00221658_rs79832076:43914226:C:T	0.0231804	0.35322
cg00225006_rs2379994:83472507:T:C	0.0038544	0.216794
cg00226093_rs4141975:61611400:G:C	0.00781028	0.00222356
cg00230138_rs4982626:22860059:T:A	0.00068879	0.0997175
cg00232107_rs11712543	0.0165366	0.449052
cg00232453_rs7887	0.00441576	0.540835
cg00232827_rs55928167:172095949:G:A	0.0472203	0.00511338
cg00234200_rs8033940:58724842:G:A	0.0101419	0.391339
cg00234655_rs7507083:78014614:G:A	0.00532042	0.0312284
cg00236141_rs7791299:1935598:T:C	0.0041316	0.0209328
cg00236919_rs224799:48021925:C:A	0.0298397	0.0049453
cg00237489_rs4621615:166521663:G:A	0.0254462	0.199011
cg00237494_rs687441:728052:A:T	0.0350288	0.592808
cg00240539_rs11188304:97139845:C:T	0.0175269	0.106566
cg00241558_rs7089361:60157339:C:T	0.00102898	0.227027
cg00242965_rs3802749:68664250:C:T	1.21489e-05	9.38688e-06
cg00244352_rs2237117:15495047:C:G	0.0252597	0.107386
cg00247870_rs4668631	0.000190845	0.00992623
cg00248115_rs6762175:65931806:G:T	0.00261159	0.814072
cg00249264_rs8053806:55549397:C:A	0.00880723	0.181186
cg00250761_rs10737357:31888836:T:C	0.000706764	0.0181972
cg00251377_rs6740395:173605080:G:A	0.030915	0.0940305
cg00251973_rs11272539:30955910:CTACTTTTCACCAAGCCTTCA:C	0.0194138	0.0173209
cg00252512_rs7675646:79530732:C:T	0.00760365	0.722098
cg00252594_rs1046651:102971016:T:C	0.0388775	0.00569384
cg00253023_rs10491176:66539435:T:C	6.15195e-05	0.137671
cg00254874_rs6107491	1.21381e-07	6.43856e-05
cg00255247_rs11790625:6445304:C:T	9.07766e-05	3.54347e-06
cg00255919_rs35829610:131823862:C:CTG	0.000225872	6.54501e-08
cg00256201_rs12464071:84795462:G:T	0.0379818	0.73814
cg00258198_rs1483185	0.00149303	0.0134866
cg00259945_rs143723028:38802699:C:T	0.0378484	0.00852102
cg00261650_rs7514102	0.0016012	1.36045e-05
cg00261668_rs2009594:16346924:G:A	0.0239146	0.000493281
cg00261770_rs2065525:3303938:C:G	0.0360874	0.406088
cg00262563_rs58984913:38006616:C:A	0.0157992	0.670415
cg00262757_rs7113640:47928715:G:A	0.000508961	0.228074
cg00263240_rs10755057	0.00137787	1.09362e-06
cg00263902_rs35393280:47543634:A:C	0.00629495	0.000350417
cg00264597_rs13018516	0.0439133	0.721159
cg00269033_rs12162062:4800009:T:C	0.0375984	0.677562
cg00271014_rs10794198:126005787:G:A	5.97965e-06	3.11288e-07
cg00271210_rs9347142:167060640:G:A	0.000699815	0.118696
cg00272123_rs11957970:148297564:G:A	0.00161591	0.0353876
cg00275686_rs7303000:750401:A:G	0.0178719	0.00475545
cg00275689_rs479229:27726071:A:G	0.000235441	0.000396097
cg00276164_rs5756708:37903578:A:G	0.015499	0.00151808
cg00276752_rs78984897:35711639:C:T	0.00519162	0.900682
cg00277769_rs11760930:97915789:G:A	0.0122066	0.106127
cg00280915_rs3213403	0.0194776	0.356547
cg00281100_rs1048956:90044789:C:T	0.0138038	0.767216
cg00282575_rs198552:48656088:G:A	0.00705854	0.00882245
cg00284516_rs10283129:117778673:G:A	0.0109818	1.73535e-05
cg00285317_rs35847523:238410068:G:A	0.000649728	0.00198854
cg00287974_rs884103	3.63985e-06	3.02341e-05
cg00288598_rs201787535:141563508:TTG:T	4.6471e-05	7.31928e-05
cg00288882_rs6788294:187596744:G:T	0.012278	1.14893e-06
cg00288957_rs1684051:65198309:G:C	0.0422695	0.00705083
cg00290483_rs4789240	5.34577e-06	3.75289e-06
cg00290994_rs60144015:41845246:C:A	0.000974401	0.00778316
cg00292312_rs58070259:7317773:G:GT	0.00128267	0.000502395
cg00294196_rs9672839	0.0116954	0.171002
cg00295764_rs6707124:43317554:A:G	0.00705403	0.0033865
cg00296011_rs75603502:39915982:A:G	0.00380192	0.248924
cg00296804_rs7979788:29217760:G:A	1.88151e-07	0.00987476
cg00299230_rs530688	0.0476208	0.297739
cg00299454_rs112205507:76389707:G:A	0.0310867	0.870805
cg00299943_rs7289286:41606264:A:G	1.09493e-07	2.33028e-07
cg00301762_rs6942630:1714075:G:C	0.0333997	0.00326445
cg00302575_rs35979727:75515037:C:A	0.00414914	0.0443895
cg00303252_9:80561271	0.00761345	0.908894
cg00303311_rs2853628:113880292:C:G	6.36165e-07	0.0011157
cg00303740_2:220052322:G:<CN0>:0	0.00161236	0.00544334
cg00306951_rs11888367:221831553:G:C	4.05947e-10	0.000374647
cg00307497_rs1263627:207977253:A:T	0.0184402	0.496727
cg00307584_rs146892314:1598026:C:T	4.34497e-05	0.602661
cg00308440_rs62448753:14875367:A:C	0.0175918	0.882889
cg00309135_rs9376002:134332468:A:C	6.67381e-05	4.13855e-07
cg00312809_rs3128332:2036597:G:T	0.00586878	0.311097
cg00313223_rs6124768:44780164:G:A	0.00190452	0.000198285
cg00314194_rs10778567	0.0233264	0.752608
cg00314404_rs2166631	0.0250859	0.0301939
cg00316800_rs2110638	0.0125482	0.345821
cg00316803_rs7174889:76479344:G:A	0.00268248	0.382921
cg00317325_rs844161:98479690:T:A	1.16745e-08	4.49247e-05
cg00318495_rs28362590:176731452:G:T	0.0128855	0.00901951
cg00319595_rs72804106:75301974:G:T	0.00282283	0.00708791
cg00320597_rs757887:1339104:T:C	0.000467279	0.000752217
cg00321478_rs1415210:197244096:A:T	0.00144302	0.00217762
cg00321603_rs10776594:49529420:T:C	6.42623e-05	0.000570656
cg00322927_rs7128493:132704916:A:G	0.0194535	0.772671
cg00323313_rs2869513	0.00661328	0.187008
cg00323915_rs34523907:150257076:G:GA	0.0161051	0.100966
cg00325661_rs111891444:49890017:G:GGTTCCTCCCA	0.0131053	0.0020121
cg00328217_rs11589881:201861481:C:T	3.79749e-06	5.09173e-07
cg00329080_rs4814454	4.47805e-05	2.80021e-05
cg00330035_rs2627693:88524940:A:G	0.00443254	0.367802
cg00330346_rs35244094:29182781:C:T	0.00335409	0.700195
cg00331518_17:1697331:GTA:G	0.00728065	0.0426065
cg00331541_rs6090469:62228192:A:G	6.44947e-06	0.48452
cg00332659_rs4887935	0.00597409	3.8002e-05
cg00334056_rs4713681:33754817:T:C	0.0073348	2.28068e-05
cg00335310_rs8050682	0.0474499	0.838143
cg00335600_rs3797596:178575948:G:T	0.0497848	0.683078
cg00335607_rs58196636:228465820:T:TAAA	1.77623e-05	0.00526074
cg00336946_rs9557452:101195485:G:A	0.00379411	0.00118609
cg00339217_rs139021874:16441721:TAAAAGG:T	0.030912	0.00180829
cg00339769_rs16889391:24489157:C:T	0.00975021	0.120638
cg00339939_rs10888783:53824168:C:A	0.0422951	0.0986183
cg00345230_rs67287475:151941734:G:A	0.0499509	0.486373
cg00346446_rs12125515:156709602:T:G	0.0481549	0.482603
cg00347893_rs3782681:8190351:A:C	0.0399193	0.551072
cg00347921_rs7979561:124088064:A:C	0.044455	0.478394
cg00348467_rs139903667:43229651:T:A	0.00777472	0.646342
cg00349687_rs217072:88067754:C:G	0.00741631	0.636126
cg00350199_rs141035289:67421375:AAAAAAAC:A	0.0208372	0.115895
cg00351980_rs7614366:99496351:G:T	0.0439571	0.126012
cg00354269_rs3795156	0.00124587	0.00128803
cg00355360_rs4782445:89182295:G:A	6.38613e-07	6.29828e-08
cg00355656_rs767303:229698931:A:C	0.000108703	0.038939
cg00358161_rs7403817:89406943:A:C	1.54411e-06	9.46848e-11
cg00360414_rs6479764:63212097:T:C	0.000578826	0.000275048
cg00363045_rs2491235	0.0254579	0.303159
cg00365336_rs5756444:37378451:T:C	4.35655e-07	0.0195379
cg00369194_rs7806286:157946906:C:T	0.0453364	0.302354
cg00371383_rs7545302	0.00322362	6.04588e-05
cg00372589_rs12192981:33805290:G:C	0.0237287	0.000105113
cg00372865_rs7043926:16257470:A:G	0.0488006	0.635654
cg00372886_rs2523735:30122657:C:G	0.0327297	0.487199
cg00372890_rs11936149	0.00369995	0.00417569
cg00372928_rs7755271:7619047:T:A	0.0473913	0.556558
cg00373245_rs67714660:145066004:C:G	1.65155e-07	0.000511572
cg00373371_rs11257470	0.0293923	0.504476
cg00374191_rs10074490:131340032:C:T	0.0191361	0.23844
cg00378228_rs12502556:10130505:C:G	0.046911	0.258494
cg00379225_rs9617144:50512116:T:G	0.0312178	0.340533
cg00379713_rs12289616:124941309:A:G	0.0494929	0.720052
cg00380574_rs2341354	0.0397161	0.0962683
cg00381511_rs3753161:92350001:C:A	0.00084017	0.163433
cg00383081_rs12756106:182365143:C:T	7.32222e-08	0.00130159
cg00383220_rs2509851:118966780:A:C	0.0110851	0.219264
cg00384018_rs1125412:75701632:C:T	0.00436402	0.301249
cg00385839_rs11469040:18811327:CTGAT:C	0.000447792	0.000338199
cg00388556_rs7148372:37136110:A:G	0.00122551	0.000268388
cg00388861_rs1831159:17791042:G:A	0.029188	0.422821
cg00390058_rs10041182:132667971:T:C	0.00612322	0.14504
cg00391247_rs68179012:31372079:C:A	0.00512746	4.60089e-08
cg00393533_rs6005042	0.0036721	0.0412708
cg00393839_rs12987998	0.0276793	0.0202236
cg00395036_rs255768:53373524:T:C	0.0233778	0.416422
cg00395210_rs10875765:48583632:T:C	0.00444867	0.0033662
cg00395705_17:43667635:A:G	0.000101491	0.000421733
cg00396101_rs1145714:88024518:T:C	1.07935e-08	3.65292e-06
cg00396899_rs4688380	0.0010043	0.0121629
cg00397190_rs10794092	0.0344133	0.363648
cg00397274_rs144391864:240230364:CG:C	0.0158258	0.534737
cg00398048_rs142721019:178373785:CAG:C	0.00689319	0.114472
cg00398510_rs1075879:10484877:C:T	0.0428138	0.205407
cg00402668_rs9276760:32773102:G:T	0.014387	0.000603582
cg00402830_rs3936503	0.00224533	0.713342
cg00404178_rs139464:41614020:C:G	0.029153	0.0275976
cg00404280_rs370933715:144625634:CT:C	0.000758966	0.000118334
cg00405699_rs373017678:100238917:TTTC:T	9.14702e-05	1.06625e-05
cg00406719_rs1972216	0.0455105	0.377844
cg00407150_rs339697:42735274:A:G	0.0280536	0.341657
cg00410034_rs9606960:32869011:C:T	2.00278e-05	1.15566e-05
cg00410206_rs61409312:96116048:C:T	0.0038958	0.00497025
cg00410459_rs62134416:69389757:T:A	0.00246088	0.0107111
cg00410585_rs2709865:158539572:T:C	0.0371041	0.729663
cg00413030_rs741060:158942937:G:A	2.07239e-05	1.63201e-06
cg00413510_rs9319930:56123799:C:T	1.5649e-06	2.63146e-05
cg00415242_rs2131655:2391836:C:T	0.00197534	0.00227539
cg00416386_rs11884580	0.00941758	0.635494
cg00418150_rs4755809	0.0291702	0.0766363
cg00419186_rs79963079:48825298:A:C	0.0266526	0.000277023
cg00419474_rs10815596	0.0419175	0.239632
cg00419680_rs855608:38527121:A:G	0.0226011	0.0388747
cg00419897_rs2237098:34305897:C:T	0.00888046	0.946257
cg00419999_rs2236349:102963640:G:A	0.0446607	0.019088
cg00420217_rs7560344:216617035:T:A	0.0479773	0.393772
cg00420450_rs34010761:22132864:CCT:C	0.000633108	0.0548854
cg00423195_rs4881112:3190298:C:T	0.0201048	0.0039303
cg00423771_rs6925151:150210723:C:T	0.0371209	0.00015796
cg00425017_rs2154628:58928681:T:C	0.0363731	0.0231196
cg00425431_rs34255732:90792940:C:A	1.10708e-05	6.51182e-06
cg00428511_rs762571:73594499:G:A	3.05478e-06	6.5455e-08
cg00428638_rs10626946:7222039:C:CAA	0.00027672	2.46347e-06
cg00429044_rs34170068:12180569:C:A	0.00587088	0.846878
cg00429105_rs224204:3296429:G:A	0.0116022	0.412669
cg00431813_rs62433143:1052524:T:G	1.39964e-06	0.00121171
cg00434743_rs7843017:124895809:A:G	0.042621	0.680431
cg00435063_rs11764539	0.00768817	0.751894
cg00435616_rs117800627:1081075:G:C	3.19476e-05	0.000420129
cg00435723_rs77890664:89252525:T:C	0.0159472	0.00378995
cg00439087_rs55713364:51450914:G:A	0.0269222	1.41243e-05
cg00439261_rs3784938:75274235:A:G	0.035688	0.171556
cg00440195_rs1169579:86647471:A:T	2.06203e-05	0.000588764
cg00440252_rs7539612:18723444:C:T	0.0259155	0.28517
cg00440671_rs12940852:1243023:T:C	0.0327319	0.0124083
cg00441262_rs4724607:47691102:A:G	0.00108353	5.78323e-05
cg00441403_rs61747755:71062308:C:A	5.46923e-07	0.000257126
cg00443188_rs7910345:97271012:A:G	2.54265e-05	2.3177e-08
cg00443946_rs34260476:86373899:G:A	0.0249087	0.108352
cg00444341_rs9419199:133919193:G:A	0.0175553	0.173511
cg00447543_rs4986109	0.000111705	2.62907e-08
cg00447672_rs551640:104191425:T:C	0.000755382	0.0364752
cg00448770_rs4533001:108432472:A:G	0.000102129	0.000550048
cg00449930_rs7187653:69562838:G:C	0.0179756	0.593616
cg00450029_rs4735900:607161:T:C	6.62785e-07	2.43997e-09
cg00450617_rs56131450:1246659:C:T	0.000256776	0.000943326
cg00451011_rs1670131:6315744:G:T	3.65555e-06	0.00256905
cg00453007_rs74845115:67356968:G:A	0.0137545	8.83086e-06
cg00455904_rs200735901:29226943:GCATGCACCAC:G	0.0139233	0.526026
cg00456672_rs8029942:62353458:G:A	0.0128177	2.15946e-05
cg00456774_rs62107630:40851371:C:T	0.0235018	0.173385
cg00457115_rs112726460:102358379:T:C	0.00721096	0.00771023
cg00458322_rs4755404:35425650:G:C	0.0147802	0.000135526
cg00458337_rs34064155:45969849:G:A	0.0332174	0.571005
cg00458932_rs59408366:208189865:C:T	0.0256349	0.83221
cg00460772_rs201909806:141470449:A:G	0.0497764	0.708848
cg00461022_rs185384:16625354:C:T	0.000617271	1.15423e-05
cg00461685_rs11355251:74198451:AT:A	0.000229385	0.0248374
cg00462334_rs6764848:10419325:A:G	0.0209263	0.869618
cg00462700_rs1046577:134021149:T:C	0.00104221	0.00186236
cg00462971_rs55958301:194788213:T:C	0.0375373	0.00241462
cg00463982_rs4786275:1580025:A:G	6.96906e-09	0.000116835
cg00467553_rs10738997	0.0416431	0.14819
cg00471673_rs71471665:1649632:G:A	0.0148475	0.298704
cg00472373_rs6809452:9824308:G:A	3.66467e-07	0.0281675
cg00473386_rs7837521:22264151:G:T	1.39027e-06	0.0348091
cg00476790_rs72983683:232100970:G:T	0.0438404	0.6635
cg00478401_rs13260306:6515293:A:G	0.00483873	0.0011989
cg00479501_rs1028397:1929662:G:A	0.000619851	6.9973e-05
cg00481080_rs74339239:151166543:G:A	0.009358	0.28317
cg00481159_rs10745741:96353296:T:C	0.00105039	0.0918359
cg00481216_rs6706397:181971800:T:G	2.58314e-06	0.156217
cg00482919_rs7827190:22263719:T:C	0.000127603	0.00406404
cg00483217_rs35290435:25321768:A:AT	1.86653e-06	0.00211942
cg00485301_rs231214	4.23712e-07	0.00654958
cg00486011_rs11723760:183855846:C:T	0.00456488	0.223329
cg00487324_rs560310:10902453:C:G	0.0331309	0.0262177
cg00488012_rs12691204:231905:C:T	0.00665307	0.781542
cg00488846_rs817837:110098368:A:G	1.00826e-06	0.0075968
cg00490687_rs6002625:42517689:A:G	0.0238773	0.00221517
cg00490688_rs72819225:93300313:T:C	5.76022e-06	1.64585e-06
cg00491428_rs6962881:151556015:G:A	0.00672212	0.308209
cg00491469_rs6972072:150240268:C:T	0.0449196	0.483995
cg00492362_rs140471295:95788697:ATCCAAAGTGTCTATTCTAGTGAGAACAATTGCTGCCCCTTCCATGG:A	0.000927372	0.630762
cg00494446_rs34188608:53051194:GA:G	0.000301991	0.0254578
cg00495035_rs10209343:240264220:C:T	0.0128871	0.612927
cg00496228_rs2375794:187359658:C:G	0.000356109	0.109057
cg00498772_rs12599090:12187341:C:G	0.00300211	0.0275322
cg00499201_rs1533941:152601097:A:G	0.000800413	0.699832
cg00499248_rs1435453	0.00095952	0.0647955
cg00500770_rs2281743:47013557:C:A	0.0293119	0.363659
cg00501952_rs676749:3026069:T:A	0.000168355	0.116745
cg00504274_rs9578767:25204741:T:C	0.0396728	3.33767e-06
cg00507227_rs2269136:44093942:G:A	0.0131869	0.599935
cg00507899_rs10933401:233506702:C:T	0.00554157	0.0487738
cg00508131_rs113851505:341988:C:T	0.0431781	0.399374
cg00509187_rs77354137:44361838:C:G	0.0392481	0.865163
cg00509485_rs10899178:69862510:A:G	0.0403784	0.236978
cg00511712_rs10230990:131716021:C:T	0.0226794	0.0222763
cg00512017_rs1005776:102896673:A:G	0.0028765	4.85503e-05
cg00512563_rs11447584:87397247:G:GC	0.000957417	0.0290025
cg00513022_rs72384637:123424069:GTACT:G	0.00165732	0.369838
cg00515575_rs9973504:47171955:C:T	0.0267143	0.782816
cg00515755_rs9989716:1007109:A:G	0.00512766	0.000292085
cg00518414_rs8068594:78683803:G:T	0.0439271	0.173553
cg00519659_rs8071497	5.24574e-07	0.416355
cg00520378_rs1058158:88781614:G:C	0.029597	0.395498
cg00520842_rs635530:226766581:C:T	0.000674809	0.0017938
cg00521620_6:29434414	0.0429139	0.0165909
cg00522213_rs10846748:125318309:C:T	0.00107294	0.000408606
cg00523633_rs67769254:70474908:G:A	0.0174295	0.424654
cg00523742_rs4789763	0.0451295	0.259407
cg00524728_rs2156568	0.0203879	0.0392965
cg00524900_rs73247096:118609941:A:G	1.19227e-05	0.000517073
cg00526275_rs59594854:118811805:C:T	0.00669285	0.233973
cg00530579_rs37671:111026101:T:A	0.00822393	0.732696
cg00531508_rs59226498:97630370:A:ACTCT	0.000102044	0.00049227
cg00531525_rs4459311:89371169:A:C	0.0187156	0.844571
cg00532797_rs1627565:150621346:C:T	7.89017e-08	5.24531e-08
cg00534837_rs12156402:62745921:G:A	0.0457446	0.815285
cg00535218_rs10205484:85468002:G:A	0.00370616	0.429439
cg00535683_rs492296:153109395:A:C	0.000653834	3.46074e-06
cg00539049_rs12470087:149932843:C:T	0.0340465	0.000209188
cg00539154_rs7532024	0.0378193	0.00166921
cg00539368_rs11483483:74515281:A:AT	0.0382586	0.0356228
cg00539955_rs1007863:44395451:T:C	0.00605629	0.667752
cg00541544_rs2072794:39150543:G:T	0.00400547	0.710197
cg00541994_rs1264:216225352:G:T	0.0188384	0.000269373
cg00542147_rs4951541:211813010:C:A	0.0116476	0.00371043
cg00542775_rs12083774:4187494:G:A	0.0387748	0.840866
cg00543944_rs72671003:123522497:G:A	0.00427778	0.0589137
cg00543991_rs190013764:32372285:A:T	6.71222e-06	4.68544e-07
cg00545580_rs9913181:78573872:T:G	0.00835111	0.493418
cg00545801_rs3844105	0.00534354	0.0435389
cg00546248_rs10797428:2411451:A:G	2.97e-05	2.76802e-05
cg00546915_rs43993:89931955:G:A	0.000523693	0.000294397
cg00546971_rs12062122:4214031:C:T	3.81157e-05	8.98401e-05
cg00547365_rs111465153:6609014:C:T	0.0198625	0.000973897
cg00547970_rs12472001	0.00772449	0.00758609
cg00548822_rs3741367	8.84141e-05	0.0150361
cg00548824_rs4482520	0.0315971	0.324628
cg00552911_rs207150:55806465:T:C	6.11639e-05	0.605687
cg00555081_rs10444086	0.0154585	0.479715
cg00555438_rs112058931:195576719:G:A	0.00546998	0.0156325
cg00563566_rs4078403:230883948:G:A	0.0382922	0.194542
cg00566187_rs61524247:230253378:C:A	0.0495484	0.714611
cg00566209_rs28371396:721161:G:A	0.017948	0.00940213
cg00568177_rs3108206:37173603:A:G	0.0162021	0.0285182
cg00570269_rs78587212:31485323:A:C	0.00563791	0.641796
cg00570438_rs2851392:44489977:G:T	0.0021312	0.619221
cg00573159_rs12972186:2452911:A:C	0.0211246	0.00049904
cg00573235_rs3214653:56875272:A:AT	0.000293194	0.0113633
cg00573428_rs2880159:3937720:C:T	4.55144e-07	2.72403e-05
cg00574251_rs7594255:164964820:T:C	0.0416275	0.483079
cg00574379_rs2249291:38344974:A:G	0.000566783	0.0462974
cg00574412_rs28497167:27897490:C:T	0.00121019	0.00214451
cg00576157_rs6084483:3795984:G:T	0.0455895	0.00744313
cg00576904_rs10846151:15300542:T:C	0.000111723	0.0103547
cg00577274_rs73079177:26531948:G:T	0.0197414	0.831524
cg00580978_rs7979378:72669533:A:G	0.0273883	0.81555
cg00581818_rs7942400:70785594:G:A	0.0410166	0.139426
cg00583046_rs2517527:31021547:A:G	0.0101823	0.538524
cg00583149_rs6485622:45397885:A:G	0.00388742	1.0848e-05
cg00584026_rs2290404:945225:A:G	0.0102044	0.0441527
cg00584323_rs61800915:33470241:G:A	0.0277728	0.360633
cg00585698_rs185878457:123756001:G:A	0.00543658	0.0421371
cg00587628_rs11400802:111585630:C:CT	0.0044191	0.408826
cg00588090_rs9481:132407089:A:G	0.000105476	1.4613e-05
cg00588198_rs416571:29648941:A:G	0.00657357	0.0277941
cg00591333_rs4969397:79108141:A:G	0.0110962	0.0116705
cg00591384_rs6943964:128145279:A:G	0.00531682	0.0328666
cg00591660_rs57972250:2485597:GAT:G	0.0403527	0.0707967
cg00591781_rs2569243:171885845:A:G	0.00197844	0.984086
cg00592571_rs3782410	0.0352539	0.550465
cg00593008_rs10038253:75472207:G:A	0.00288027	0.637283
cg00594880_rs70943871:17154780:ACT:A	3.71819e-06	0.000183057
cg00596184_rs4071564:69351151:A:ACAG	0.00356028	0.00225774
cg00597107_rs79788515:1101079:C:T	0.0238111	0.788336
cg00597931_rs2241734:142186963:G:A	0.0395698	0.000612251
cg00598693_rs72544298:10265144:A:G	0.00038415	0.0176719
cg00599151_rs72247377:58291591:ACCCGGC:A	0.0107245	0.0152802
cg00601448_rs2837002:40763986:T:G	1.62494e-05	0.0110854
cg00603172_rs6733504:242495953:A:G	0.0214522	0.0080023
cg00603225_rs9540363:65718848:G:A	0.0271169	0.888815
cg00604900_rs4912832:141652091:G:A	0.0015236	0.00448756
cg00605306_rs178030:21129295:T:C	0.000375052	0.0233572
cg00605373_rs236419	0.0255993	0.0517211
cg00606578_rs2844775:30179422:G:A	0.0342485	0.606003
cg00606880_rs7911345:63213841:G:C	0.00146007	0.637366
cg00609333_rs1913262:16505238:A:T	9.75769e-05	2.76619e-06
cg00611227_rs36120778:116125445:G:GA	0.0257543	0.000242706
cg00613587_rs787829:120983076:T:C	0.0129463	0.859137
cg00613827_rs12729557:207846068:G:A	0.0415218	0.0155412
cg00615188_rs598764:105355768:C:T	0.0105032	0.0187668
cg00615746_rs16968477	0.00783624	0.0598105
cg00617064_rs1866654:27263122:T:C	0.00131447	0.154375
cg00617876_rs7317489:42848049:T:G	0.0491923	0.244525
cg00617979_rs608367:126080757:T:C	0.0328616	0.490683
cg00618323_rs31777:176523562:C:A	0.00524822	0.0335971
cg00619061_rs13049363:43380231:A:T	0.00388501	0.331327
cg00620234_rs12326595:25492678:C:T	0.0137348	0.868743
cg00621247_rs10066840:1950343:C:T	5.70906e-06	0.000158884
cg00621826_rs935822:1111472:C:T	0.00714936	0.00532796
cg00622170_rs1063745:2952506:A:G	4.04497e-07	4.6507e-06
cg00624885_rs10902925:125090265:A:G	0.000567117	0.773942
cg00625610_rs7209810:78783805:G:C	0.0422187	0.874562
cg00626119_rs1800601	0.00667603	0.0379974
cg00626853_rs871074:62628438:T:G	2.86806e-05	0.759365
cg00626957_rs34878269:37585243:GT:G	0.00958958	0.589276
cg00628299_rs11861339:78094390:C:T	0.00439781	0.00158193
cg00628721_rs9856584:141148698:C:A	0.0400622	0.762105
cg00629513_rs759879:205127988:G:A	0.00920858	0.838537
cg00630028_rs61543167:118665723:CG:C	0.0267876	0.582092
cg00630761_rs4236816:94906254:A:G	1.98787e-05	5.15984e-07
cg00631329_rs7450556:26299900:C:T	0.000996633	2.36757e-06
cg00631940_rs10920099	0.000710819	0.0146392
cg00633520_rs2276906:818440:G:A	2.26691e-05	0.0135326
cg00634318_rs148587892:83227962:T:TG	0.000452182	0.000433501
cg00636119_rs12794995:67372946:G:A	6.96373e-05	0.00353236
cg00636930_rs34885064:104041510:TTC:T	0.041086	0.624639
cg00638631_rs11700489:39043003:G:A	0.0407686	0.108416
cg00638945_rs28485705:98276105:C:G	0.000307705	0.0371037
cg00639925_rs219787:37829508:C:T	0.0288309	1.0559e-06
cg00639946_rs7254597:28322345:T:C	0.0446834	0.00367119
cg00641052_rs751271:50751175:T:G	2.7793e-06	1.05186e-07
cg00643145_rs4595818:11483475:A:G	0.0192152	0.0154785
cg00643235_rs2235676:24645697:G:T	0.00376641	0.891976
cg00645075_rs11223729:134091813:A:G	0.0311553	0.256576
cg00646555_rs12467079:71140763:G:A	0.00934149	0.689421
cg00648184_rs8064732:60838043:C:G	0.0199387	0.0292359
cg00650809_rs11667523:17438918:T:C	0.0145998	0.000206714
cg00651363_rs2613778:5080194:A:T	0.00740288	0.453724
cg00653281_rs75227206:1997187:A:G	0.000500477	0.68933
cg00655782_rs11063613:5419035:A:C	0.0314863	0.0241559
cg00655923_rs113207626:64885795:T:TA	0.0087422	0.106848
cg00657389_rs269528	0.00791335	0.000396001
cg00658161_rs56330356:27278847:A:G	0.0436464	0.651363
cg00658778_rs9999285:155410407:C:G	0.0389178	0.233403
cg00659077_rs62101233:77724288:C:T	0.023108	0.480483
cg00660661_rs12202351:114016321:T:C	0.0266408	0.00147327
cg00662863_rs6838432:185778265:C:A	0.0170863	0.188193
cg00663184_rs7869808:90232304:A:G	0.0319665	0.431268
cg00663750_rs7535106:225935369:G:A	0.0238748	2.81106e-05
cg00664454_rs66736014:57149174:C:T	0.0128754	0.537738
cg00669593_rs6414508:184177368:A:G	0.0262322	0.65998
cg00669876_rs1497233:59195969:A:G	0.000128884	9.98864e-05
cg00669892_rs2269854:30789799:C:T	0.00403366	0.136386
cg00670212_rs7625376:101721602:G:A	0.0292881	0.158177
cg00670958_rs7654502:109099712:T:C	0.0185614	0.490675
cg00673059_rs6011066:62364180:G:A	0.00266442	0.308563
cg00674807_rs4889285:81252258:C:T	0.00132254	0.00214296
cg00675009_rs12621121	0.000287906	0.00711904
cg00675336_rs6854641:189324617:G:A	0.0207109	9.23617e-07
cg00675878_rs5759629:23517976:T:C	1.07768e-05	1.37354e-07
cg00676373_rs4960203:6472037:A:C	0.00166732	0.0848663
cg00676602_rs3911110:11318477:C:T	0.0394866	0.238134
cg00676988_rs35698402:186500439:T:C	5.33862e-06	4.64247e-07
cg00677809_rs1946389:70021686:G:A	0.0272832	0.905027
cg00678208_rs6067091	0.0123638	0.0268165
cg00678472_rs1995641	8.5889e-06	1.20208e-07
cg00679794_rs266750:186512835:T:C	0.0243958	5.77189e-11
cg00684116_rs57978975:101094476:G:A	0.0013689	0.855232
cg00685319_rs9911968	1.45893e-10	2.53005e-10
cg00685480_rs173391:127943982:C:T	8.2151e-06	0.00169207
cg00687962_rs62303904:40265010:C:A	4.34458e-05	5.95592e-06
cg00688253_rs10457181:109032772:A:G	1.69977e-05	1.67398e-05
cg00688269_rs10992769:96276910:C:G	0.0267893	0.693902
cg00688321_rs12066542:208130219:T:C	0.00020619	0.319562
cg00688946_rs7741722	0.00351543	0.658353
cg00689471_rs7222860	1.75572e-07	1.98623e-05
cg00690270_rs9844183:52315192:A:G	0.00596081	0.0152359
cg00690402_rs1529334:46671792:T:C	7.85277e-05	0.00286164
cg00691874_rs8066678	4.19675e-05	1.13642e-07
cg00692355_rs17075352:31660123:G:C	0.0186299	0.134276
cg00692780_rs73091503:222441525:C:T	0.000716422	0.492681
cg00693696_rs2280146	0.0370037	0.313241
cg00696567_rs28591601:25042983:A:G	0.0421872	0.725199
cg00697057_rs6596473:138710576:G:C	0.011447	0.0592038
cg00697486_rs72763910:233226357:G:A	0.0410908	0.129348
cg00699569_rs12049389:157537967:C:A	0.0251337	0.895308
cg00700214_rs12752688:171151638:C:T	0.00733869	0.155205
cg00701772_rs59096890:233189070:T:C	2.3112e-06	3.33769e-05
cg00704421_rs1576900:18629792:G:A	0.0226509	0.00902078
cg00704909_rs112300413:14513216:A:G	0.0369678	0.309555
cg00705600_rs61005773:185820950:A:G	1.37668e-05	0.845544
cg00706030_rs10963995:19144342:T:C	0.00281815	0.000462181
cg00706994_rs7120797:59193411:C:T	0.00923289	0.251264
cg00707134_rs152174:66910573:T:C	0.0214956	0.00226592
cg00711072_rs1529334:46671792:T:C	0.000493142	0.000454751
cg00712311_rs5848615:42040170:CA:C	0.00997334	0.905861
cg00712405_rs143390483:93677891:C:T	1.21643e-06	1.03353e-05
cg00713670_rs4727455:100070680:G:A	0.0227524	0.223509
cg00713939_rs2290417:144657269:G:C	0.000988652	0.30391
cg00713942_rs11994361:39717653:A:G	0.00554898	0.77975
cg00715698_rs7146783	0.0317188	0.182092
cg00716991_rs4455947:36174423:A:C	0.039996	0.382222
cg00717859_rs6544945:47208699:G:C	0.0299846	0.588505
cg00719767_rs11771181:64029014:A:G	0.00831274	0.856175
cg00720845_rs13131168:784096:G:C	0.0211477	0.129871
cg00721416_rs7537713:23155721:G:T	0.000164211	0.809804
cg00722323_rs2645162	0.0286221	0.793681
cg00723307_rs3735885	0.013514	0.797574
cg00723395_rs10815342:611838:C:G	0.000727787	0.0270539
cg00724095_rs217194:116463080:T:C	0.00930496	6.03812e-07
cg00728507_rs966102:25402705:G:A	0.000150852	0.817305
cg00730182_rs71408231:12161863:CT:C	0.00716982	0.678334
cg00730413_rs4611010:115606259:A:C	4.40773e-07	5.33569e-05
cg00730670_rs2067560:105510744:A:G	1.22878e-06	6.97981e-06
cg00730780_rs2478839	0.0175322	0.00754196
cg00731487_rs73093392:11492269:A:G	0.00105126	0.000365378
cg00731608_rs749206	0.0454132	0.118154
cg00733150_rs226499:45703075:A:G	0.00956563	0.0188485
cg00733660_rs4237769	0.000385027	0.020625
cg00733749_rs12711473:87224293:A:G	0.00254745	3.85038e-05
cg00735398_rs5820689:46261361:T:TAC	0.0476423	0.06579
cg00737264_rs12192156:169059013:C:A	0.000245992	0.00639098
cg00737506_rs633695	0.0382563	0.00938332
cg00738919_rs79788515:1101079:C:T	0.000132943	0.00274303
cg00739278_rs2893554:38350808:T:C	0.00322755	0.23231
cg00740462_rs10975726:6665851:G:C	0.00937018	0.538539
cg00741954_rs3800037:1760664:T:C	0.0143094	0.00123535
cg00743641_rs11158954	0.0167806	0.7527
cg00744739_rs1004897	3.01029e-05	5.56147e-07
cg00749291_rs6485448:12111534:G:T	0.0134058	0.113691
cg00750606_rs34942289:20897623:C:CGTG	2.64014e-05	0.000990009
cg00750934_rs8015814:74270237:C:T	2.92035e-06	0.00289333
cg00753039_rs4284331:134972183:G:A	0.000131357	1.55938e-07
cg00757033_rs138463178:89923929:C:CAT	0.00842658	0.287654
cg00758961_rs10939614:9926613:T:C	0.0391495	1.83556e-05
cg00760950_rs7991096:38071856:C:A	0.00219111	0.420266
cg00763183_rs143847336:4053092:C:CA	0.000138313	0.00814965
cg00763223_rs927613:58254245:T:C	0.00468585	9.01792e-05
cg00768023_rs139857:38292974:T:C	0.0284041	0.00239071
cg00770181_rs11632955	0.0445453	0.384991
cg00771376_rs2182249	0.0343174	0.0513097
cg00773142_rs74029289:81908322:C:T	0.000390019	0.00319988
cg00774579_rs6565516:78965146:A:G	0.0012006	1.82803e-05
cg00774777_rs1149602:76479810:G:A	0.00166976	0.000237426
cg00775816_rs729712	0.048875	0.421077
cg00775945_rs77322607:104496217:T:C	0.0230918	0.746059
cg00776960_rs12592280:65697050:T:A	0.0268419	0.142702
cg00777198_rs3759193:52828439:A:G	0.00626973	0.0152739
cg00779351_rs112101194:127575339:GT:G	0.0335269	0.336126
cg00781795_rs576416	0.00232605	0.0442957
cg00782718_rs10840500:2196910:G:A	3.4519e-06	2.92344e-06
cg00782844_rs910765:36569009:A:G	0.0401135	0.360802
cg00784718_rs66522549:221910411:T:C	0.046398	0.0874691
cg00785652_rs4662401:142882195:A:G	0.0169737	0.355367
cg00786977_rs72925996:90930513:T:C	0.00309147	0.00977089
cg00788012_rs220119:43529228:C:A	1.60262e-08	2.44814e-08
cg00792420_rs7320470:28427292:C:T	0.0411006	0.425064
cg00794549_rs1952590:103656104:G:A	0.00752289	0.386124
cg00794956_rs111321288:201697204:C:T	3.42717e-06	0.00446436
cg00796552_rs6431547	0.0010743	0.267746
cg00797110_rs7331418:20880993:C:T	0.00652355	0.0233141
cg00801339_rs11128707:14591670:G:A	0.000887735	9.76728e-06
cg00802855_rs10857781:134916526:T:C	0.0382829	0.672493
cg00802903_rs2239966	0.0049902	0.017614
cg00804324_rs2849727:44483453:C:T	0.000374775	0.00515696
cg00805193_rs817336:62603060:C:G	0.000304065	3.05933e-06
cg00806245_rs3017651:76668622:T:C	0.00198863	0.509016
cg00806364_rs4756346:36772678:C:T	0.0304347	0.395764
cg00807063_rs1558261:14678561:T:C	0.0235656	0.00580583
cg00809164_rs72818417:56660816:G:A	0.000128516	4.24848e-06
cg00809377_rs454267:34152653:C:G	2.712e-06	7.51697e-05
cg00809820_rs7217361:80710615:C:T	0.000478717	1.50416e-05
cg00810807_rs6805720:189888729:G:A	0.00363149	0.770457
cg00811358_rs136224:31219193:G:C	0.00800773	0.0124676
cg00812529_rs17233602:89812851:CTG:C	0.0132757	0.0707485
cg00812557_rs5857594:38081349:C:CA	2.45009e-05	0.150203
cg00812689_rs35461543:855107:C:T	2.3056e-05	0.0105442
cg00813993_rs11247908:26638222:G:A	0.000109713	0.000482365
cg00814721_rs13411629:43566990:T:C	0.0482007	0.00781426
cg00815214_rs4818835:47724702:T:C	0.0289006	0.518356
cg00817464_rs1815249:111655790:C:T	0.00124889	4.28391e-05
cg00819880_rs4752967:47169376:T:C	0.0105665	0.0448307
cg00820530_rs489106:57952870:A:G	0.00958861	0.562703
cg00821396_rs12551269:5329029:T:C	0.0103308	0.809249
cg00822735_rs1361754:205801872:A:G	0.00251015	0.605894
cg00823608_rs380229:4944252:A:G	0.00101116	0.00401539
cg00823688_rs11038371:45282531:A:G	0.0151643	0.0116433
cg00826632_rs8107747:46975520:C:T	0.00622861	0.139362
cg00827939_rs1557543:39852648:C:T	0.0026121	0.00078807
cg00829944_rs7952435:64046872:A:T	0.0239961	0.236044
cg00833703_rs2967160:57811571:C:T	0.00548736	0.10818
cg00834537_rs34026011:104050883:G:A	0.000780563	9.66487e-05
cg00835664_rs3897580:125832714:C:T	0.032522	1.96397e-05
cg00838259_rs9398240	0.0110395	0.0520832
cg00839272_rs12989031:175583616:T:C	0.00139956	0.289318
cg00840694_rs13261654:2002431:G:A	1.9274e-06	1.78279e-05
cg00843506_rs9879730:128362258:G:A	0.00952888	0.728457
cg00846297_rs2569216:171859681:C:G	0.0109795	0.265009
cg00847453_rs9400380:110718528:T:A	0.0220538	0.0227949
cg00849267_rs4984985:978210:C:T	3.11429e-06	0.0070592
cg00850068_rs10410586:8435019:A:G	0.00156767	0.30728
cg00850391_rs11691753:10551889:A:G	0.000853826	0.046101
cg00854024_rs1800708:26093303:T:C	0.0274402	0.371806
cg00854799_rs1129332:2336210:C:T	0.0425647	0.8305
cg00854933_rs7523029	0.0488949	0.00639097
cg00856825_rs171407	0.0103861	0.707769
cg00857536_rs4508127:50294263:A:G	0.0373396	0.427372
cg00858400_rs9673280	0.0248982	0.00218424
cg00859178_rs12749530:162463748:A:G	0.0444134	0.365572
cg00860726_rs6740664:129501193:C:T	0.00470529	0.581943
cg00862443_rs2140772:233471239:T:C	0.0426908	0.672809
cg00863409_rs7604511	0.024364	0.00874308
cg00864860_rs79477792:7898122:C:CGT	0.00036859	0.0777435
cg00865549_rs10869400	0.00386251	0.525434
cg00866264_rs212989	0.000742019	0.0118399
cg00870849_rs11186867:93993811:C:T	0.035789	0.425681
cg00871273_rs8070470:64508038:T:A	6.41548e-08	2.85694e-08
cg00871371_rs4789454:75375199:C:T	0.00310733	0.44078
cg00872701_rs7973196:27730257:A:C	0.0177164	0.355379
cg00878188_rs59794430:106903344:AG:A	0.045487	0.357739
cg00886182_rs183638744:23661789:T:C	0.00184963	0.0060243
cg00887018_rs3753997:201337768:C:T	0.000140387	0.00126009
cg00887175_rs12671079:134292894:A:G	0.0424468	0.865822
cg00887848_rs736993:3485760:T:C	0.0470833	0.00617796
cg00888108_rs9954562	0.0335789	0.58114
cg00888789_rs3774209	0.0275759	0.000165542
cg00891649_rs62055544:43964539:A:G	0.0128881	0.00230673
cg00891684_rs4950836:202192624:A:G	0.0274936	0.586014
cg00892096_rs2807845:220996287:G:T	0.0133032	0.590425
cg00892417_rs747944:149294473:A:T	0.0467252	0.136974
cg00893603_rs4770894:26577514:G:A	0.00539927	0.000358502
cg00894547_rs2181738:55981948:C:G	0.00591908	0.0090438
cg00895324_rs8131854:41236964:C:T	0.0297121	0.0956182
cg00897087_rs62011512:78337835:T:C	0.00252048	0.698524
cg00897343_rs6957511	0.0326961	0.631589
cg00897404_rs8058619:75182354:G:C	0.0120485	5.88932e-07
cg00899160_rs11191980:106032213:T:C	0.00573541	0.096073
cg00901687_rs11649849	1.86756e-05	0.00751214
cg00904576_rs6684309:181208204:G:C	1.00764e-12	1.7252e-10
cg00906528_rs7534336:192760884:T:A	3.00326e-07	0.000307623
cg00907043_rs71391984:5030618:AT:A	0.00127418	0.0001131
cg00907200_rs876570:239032650:A:G	0.0328524	0.620701
cg00908271_rs10871409	0.000500345	1.42029e-05
cg00908828_rs7185352:75300248:G:C	0.0216153	0.0419155
cg00909579_rs13263296:120886545:C:T	0.0213083	0.343022
cg00909806_rs77869559:212682651:T:C	0.00461255	0.00249829
cg00910586_rs151210012:54521931:G:GC	5.13321e-07	6.56088e-05
cg00913912_rs13000076:153274349:T:A	0.0136004	0.828971
cg00914028_rs322777:127759126:G:C	0.00304258	0.0036575
cg00915473_rs8084522:3692865:C:T	0.00624665	0.000247311
cg00919014_rs4853963:241081598:T:C	2.13927e-10	9.68937e-09
cg00921237_rs6009463:49506454:C:T	0.00153173	9.12662e-06
cg00922157_rs146507345:1118333:A:T	0.000170156	0.00691724
cg00922841_rs4240865:152954839:A:C	0.000413755	0.00857349
cg00924278_rs67120114:3507075:CACTG:C	0.00189498	0.122073
cg00925516_rs59407364:39236235:C:A	0.0347454	0.202309
cg00929254_rs7900742:134043537:C:T	0.0441258	0.105162
cg00931336_rs588569:30887835:G:A	0.0128996	0.000227682
cg00931710_rs1610281:112741237:C:T	7.86532e-05	0.000739757
cg00934597_rs7785252:902394:A:G	0.0262087	0.643457
cg00935108_rs2541622	0.0368231	0.728638
cg00936309_rs2076311	0.0436262	0.681673
cg00937012_rs1259180:83244680:T:C	0.0312914	0.674505
cg00937982_rs2070649	0.000147002	0.000337595
cg00939682_rs703065:16928435:C:T	0.0304317	0.180781
cg00939970_rs4542420:66277610:G:C	0.00566078	0.405102
cg00943312_rs1105917:73873656:C:T	0.00815982	0.512936
cg00943359_rs112091182:13216535:C:T	2.36844e-05	0.000177563
cg00944626_rs10817609:117184926:T:C	3.5428e-06	5.81518e-11
cg00944649_rs1763613:16331909:G:T	0.0233244	0.0147302
cg00944873_rs2206525:24636903:A:G	7.65525e-05	1.33155e-07
cg00950627_rs11789215:111608881:C:T	0.00068209	0.539634
cg00952162_rs13227243:64707243:G:A	0.000119055	0.00486764
cg00952573_rs214595:18208580:T:C	0.00095191	0.694895
cg00953481_rs387332	0.000797329	5.26202e-05
cg00955808_rs34477158:21763876:G:C	0.000447541	0.00585252
cg00958293_rs11603014:130730825:G:A	0.00038115	0.865287
cg00958927_rs2205604:175155207:T:G	0.00111541	0.422012
cg00959864_rs12365424:33042257:C:T	1.50949e-08	3.62945e-09
cg00960888_rs8845:105461832:C:T	0.000936136	0.866772
cg00963171_rs2398706:2156338:A:T	0.0490486	0.302838
cg00964400_rs6691421:21643614:A:G	0.0417512	0.00566739
cg00964848_rs140889734:73982097:GCCCA:G	3.41352e-05	0.00491968
cg00965133_rs6019159:36157490:A:C	0.00351526	0.000880668
cg00965309_rs11864916:84228305:C:G	1.98722e-05	5.10024e-07
cg00965733_rs2104734:25526668:A:G	0.0154803	0.0377849
cg00967854_rs35988140:17754916:CCT:C	0.00866146	0.661384
cg00970275_rs17007055:124448120:T:A	0.00382062	0.215867
cg00970752_rs2496337:15711363:A:G	0.00436733	0.213812
cg00971309_rs3763349:32808232:A:G	0.0259942	0.0343391
cg00971332_rs10790223:117800700:C:T	2.50565e-07	8.27196e-06
cg00972052_rs56369736:71638429:C:T	0.0321011	0.211167
cg00972288_rs7896005:69651125:A:G	0.0341213	0.518717
cg00973942_rs7219102:7977368:C:T	0.000749961	8.08956e-06
cg00976081_rs12132114:92293721:G:A	0.0321316	0.0010631
cg00976381_rs6596473:138710576:G:C	0.00189302	0.0265842
cg00977403_rs4786275:1580025:A:G	0.0357139	0.134905
cg00979572_rs72878029:205889:T:C	0.00565854	0.000130235
cg00981200_rs58264610:127418576:G:A	0.0202467	0.171882
cg00981330_rs13220718:114554866:A:G	0.000220351	0.919781
cg00983440_rs57420220:79428886:C:T	0.00420897	0.675339
cg00984392_rs4484630:131991657:A:G	0.0203538	0.583705
cg00984468_rs3748606:151552372:T:A	0.00262373	0.564037
cg00985115_rs10875765:48583632:T:C	1.41015e-05	1.77726e-05
cg00985564_rs570945:29103272:G:C	0.031794	0.580776
cg00986987_rs3216299:28604205:C:CT	0.0126947	0.169456
cg00988691_rs3767900:25984511:T:G	0.0287364	0.281286
cg00990409_rs116074763:25360196:G:A	0.0408884	0.170175
cg00990769_rs2244554:98963242:G:A	0.0373687	0.437753
cg00991179_rs10521332:55998694:G:C	0.00972905	0.00304151
cg00992159_rs34582641:100616281:C:T	0.00882483	0.806478
cg00995368_rs17612852:32620572:G:A	1.34968e-10	7.99286e-10
cg00996050_rs13040032:47096149:T:A	0.00880621	0.58697
cg00996827_rs897635:2846274:A:T	0.000179084	0.0175643
cg00997713_rs1566965:31881971:C:T	0.00902354	0.00497375
cg00997798_rs67810121:240612116:GT:G	0.0330969	0.776417
cg01001246_rs11865080:85390388:G:A	0.0169562	0.031885
cg01002857_rs12338:11710888:G:C	0.000598374	0.0018306
cg01003399_rs62018159:40397421:G:A	0.011402	0.231719
cg01003928_rs12260905:93314712:T:C	8.02253e-06	0.001507
cg01004173_rs3810368:4342730:G:A	0.0104136	0.143833
cg01005371_rs7267937:46423399:C:T	0.00228869	0.805777
cg01005565_rs6479249:99086126:C:T	0.030059	0.000831732
cg01005937_rs881583:84698394:C:G	0.00253057	0.031993
cg01007345_rs61010385:48266135:G:C	0.00984927	9.76719e-06
cg01009414_rs2396361:1915372:G:T	0.0431668	0.358857
cg01011619_rs6696299:111505594:A:T	0.0137374	0.502588
cg01012572_rs6877321:16785599:C:A	0.00126666	0.000122289
cg01016533_rs56314408:31117389:T:C	0.00991305	0.463691
cg01017773_rs73065298:57983081:C:A	0.030543	0.364564
cg01019301_rs4775518:62901152:A:G	0.0351662	0.093794
cg01020356_rs2365286:156258179:G:A	0.0279398	0.00291011
cg01021283_rs2104419:81039475:T:C	0.0191259	0.108843
cg01022117_rs832175:201259645:G:A	9.719e-05	0.00284282
cg01023759_rs3212349:89983537:C:T	6.13266e-06	0.00014254
cg01028458_rs78414512:20668277:C:A	0.00347301	0.0080682
cg01028469_rs2685508:55964018:G:C	0.00446451	0.00142533
cg01031670_rs137121:43013554:C:T	0.0240108	0.545796
cg01033844_rs932529	0.0276391	0.130009
cg01036849_rs9875341:196297715:T:C	0.0154195	0.800052
cg01037823_rs9925556:2880105:C:T	5.48072e-06	1.88359e-05
cg01040850_rs6678384:181011529:G:T	9.25865e-05	0.674848
cg01047613_rs3746386:31446742:G:C	0.0433678	0.0847207
cg01049138_rs142577248:95529019:C:T	0.00386223	0.0199237
cg01051240_rs7563556:41968573:A:G	0.000694154	7.02642e-05
cg01052636_rs71602492:645568:C:G	0.0356564	0.000155169
cg01052776_rs36138878:497647:G:GCTCA	4.38529e-05	6.73152e-06
cg01052993_rs1285914:141615875:G:A	0.003228	0.0273063
cg01053213_rs2294532:6694927:C:T	0.0101278	2.88385e-06
cg01054454_rs2572925:143867905:C:T	0.0317143	0.000105285
cg01055967_rs350250:12202524:C:G	0.0393077	0.397951
cg01056242_rs7136157:131624680:G:C	0.000316184	1.44685e-05
cg01057552_rs12066906:228410175:A:C	1.14935e-05	0.0110078
cg01060855_rs114863511:182031965:T:C	0.000291169	0.0162556
cg01061047_rs639756:68633551:T:C	0.00265562	5.13157e-06
cg01062564_rs6431292:235669314:G:T	5.04539e-06	0.00241047
cg01063146_rs6091173:49134099:C:T	0.0376241	0.0176096
cg01064363_rs4665831:26399745:C:T	0.0308458	0.66868
cg01064373_rs2853944:31247758:T:C	4.28896e-08	8.40303e-05
cg01064897_rs33985588:133244668:CA:C	0.032818	0.190357
cg01065210_rs1129332:2336210:C:T	0.000484354	6.77548e-05
cg01065679_rs7548749	0.00788872	0.745506
cg01067782_rs62037665:12051223:C:T	0.0131698	0.304573
cg01073479_rs1690446:3519009:T:C	0.00382892	0.0339391
cg01074613_rs228784:42097906:T:C	0.0332609	0.21361
cg01074928_rs1061808	0.0491458	0.695943
cg01077185_rs2074702:149559839:G:A	0.0018426	4.56614e-07
cg01077274_rs2639706:225874059:G:C	0.000455246	4.22903e-06
cg01077713_rs2018326:18977235:C:T	0.0202604	0.612809
cg01077779_rs12622174:242199532:C:T	0.00111777	0.955814
cg01081584_rs16970112:40271935:A:G	0.00411168	0.00046222
cg01082878_rs3740104:18937722:T:G	0.0438975	0.00138545
cg01083725_rs3018936:107871061:A:G	1.98724e-06	0.00125817
cg01087239_rs12983444:18386367:A:G	0.0417636	0.509695
cg01087662_rs76945126:114364906:G:A	0.0497114	0.8537
cg01089319_rs3749034:171673475:G:A	0.0366306	0.543499
cg01089331_rs10643911:18024805:C:CTTCT	0.0438157	0.497358
cg01091713_rs7164529	1.80258e-05	0.000393012
cg01094192_rs1546877:33161262:C:T	0.0453998	0.241368
cg01094334_rs61979724:35094293:C:T	0.00586566	0.00160477
cg01095395_rs473702:101045977:A:G	0.0439532	0.940875
cg01097768_rs2671888:370782:T:C	0.00194776	0.339311
cg01098711_rs11061352:131647719:A:G	0.0114001	0.0169007
cg01100690_rs35742261:4963726:CT:C	0.00515329	0.485849
cg01103827_rs428602:40547004:A:G	0.00455725	0.3412
cg01105819_rs9929530:8627136:C:A	0.0192445	0.583746
cg01105833_rs140862292:27675844:T:C	0.0304357	0.112538
cg01106366_rs2075079:150498836:C:G	0.0263742	0.0547063
cg01106572_rs71712832:150744369:CCGT:C	2.06449e-06	1.73705e-08
cg01106792_rs4451128	0.00776563	0.610199
cg01110668_rs10998801:71227587:T:A	0.0127543	0.17668
cg01112036_rs2175649:5652365:C:G	0.0110434	0.0538179
cg01112801_rs1543652:30448000:G:C	0.0331532	0.0101638
cg01114368_rs7277232:43095763:G:A	0.0173383	0.0113236
cg01114746_rs1681631:47969179:T:C	0.0113921	0.0578345
cg01115209_rs2924570:48257553:A:C	0.000940571	0.194161
cg01117492_rs12113381:1143127:C:T	0.00693196	0.249264
cg01118207_rs4900560:103621369:T:A	0.0326042	0.466705
cg01119278_rs116854289:110719770:C:T	0.00527251	0.128124
cg01119875_rs75976677:159734997:C:A	0.0168813	0.679296
cg01119957_rs10831148:93662613:G:A	0.0456499	0.000794291
cg01124539_rs7034009:132315467:T:G	1.86821e-08	3.62716e-07
cg01125617_rs533107:894236:T:G	0.000158605	1.31898e-05
cg01125659_rs4403278:123385123:G:C	0.000780646	0.00461838
cg01126407_rs3729639:67225501:C:T	0.0128135	0.867298
cg01128039_20:1589901:C:<CN0>:0	0.0119131	0.0224414
cg01128127_rs4845878:11824346:G:A	0.00649873	0.308678
cg01128504_rs6950868:45960323:C:A	0.0292496	0.379053
cg01128728_rs4076467:76570861:T:C	0.0060274	0.105557
cg01129004_rs884103	8.88483e-06	4.49374e-06
cg01129115_rs4980859:274647:T:C	2.40093e-05	0.0141747
cg01131038_rs6601514	0.0432578	0.0132278
cg01131395_rs77867837:47207782:C:A	5.24932e-08	7.62167e-06
cg01132048_rs570436:45142673:C:T	8.85388e-05	1.068e-10
cg01132949_rs4346385:85504989:A:G	1.554e-05	0.00447847
cg01135259_rs12419605:1665291:T:C	0.0111585	0.659318
cg01136850_rs7687178:108297976:G:T	0.0288109	0.422959
cg01137366_rs11860145	0.000111555	0.622702
cg01139699_rs4775791:49278326:A:G	0.0255008	0.0673148
cg01140877_rs1571586	0.000129101	0.00198622
cg01142117_rs10108150:145687475:G:A	0.0414836	0.543866
cg01142212_rs361522:13289996:AT:A	0.00207616	0.00404656
cg01144538_rs11642667:12250341:T:C	0.00218147	0.314538
cg01144609_rs74019800:58159888:A:G	0.000389601	1.65587e-05
cg01145442_rs7927643:6785819:T:G	0.0304945	0.570764
cg01147467_rs13387589:30136619:T:C	0.0344712	0.251095
cg01147727_rs2841244:105360746:T:C	0.000285716	1.48416e-06
cg01151029_rs9939043	0.0455098	0.688101
cg01152025_rs10121612:15296852:A:C	0.0361994	0.305439
cg01152688_rs28742266:651369:T:A	0.0143582	0.0597674
cg01153737_rs4838869:50713371:G:A	0.0257433	0.489628
cg01155411_rs7089455:20885285:A:G	0.0461768	0.668539
cg01157143_rs11025139:19480830:C:T	0.00931932	0.26072
cg01157280_rs2292875:238499318:A:G	0.0401443	0.197978
cg01158657_rs2782605:52114659:A:G	0.0428034	0.827158
cg01159980_rs41117:16509183:A:G	4.50292e-08	0.0018161
cg01161811_rs827018	0.0386646	0.735726
cg01162358_rs62239284:17906707:G:A	0.00816761	0.788978
cg01165022_rs12806128:93634972:C:T	0.000474321	0.000143533
cg01165816_rs1720068:122363695:C:T	0.0410602	0.339608
cg01166526_rs11951049:10644131:A:G	0.0388107	3.61623e-05
cg01166932_rs11631792:57692950:G:A	5.66294e-06	0.491838
cg01168223_rs2735970:2021815:T:C	0.0258595	0.163114
cg01170214_rs8011450:95505605:C:G	0.015931	0.66671
cg01170694_rs17632159:72431482:G:C	1.77941e-08	1.60052e-08
cg01176728_rs3862772:82671930:C:G	0.0205456	0.00340307
cg01179771_rs2851110:74875547:C:G	0.0184308	0.0417755
cg01182332_rs12731245:45487251:C:G	0.0166655	0.21492
cg01183669_rs6537745:113154080:T:C	0.0292086	0.559233
cg01184930_rs498933	0.00556567	0.000403882
cg01188023_rs4801464:57834720:C:T	0.0397573	0.851478
cg01189168_rs1953654:208070406:G:A	0.00145213	0.101389
cg01190171_rs145024548:31135167:T:TAA	0.00807793	0.496116
cg01191920_rs62479982:158227546:A:G	0.0129701	0.00106923
cg01195881_2:19770560:A:T	0.0433661	0.853035
cg01198434_rs117251231:38401809:A:G	0.0223202	0.346512
cg01200344_rs2223995:134935764:G:T	0.0268	0.36871
cg01200493_rs11350787:82781311:TC:T	0.000507706	0.000163364
cg01200805_rs1278022:113018371:T:C	0.0493467	0.57763
cg01203858_6:2014172:A:G	6.70173e-05	0.000103389
cg01204684_rs148709038:150495343:G:A	0.00472995	0.710342
cg01204772_rs62183231:240739102:G:A	0.00423871	0.000364622
cg01204915_rs10020861:87777245:T:C	0.00471988	0.00107687
cg01212326_rs6589225:111246861:T:C	0.0312885	0.205118
cg01212329_rs7976087:104972844:G:C	0.00491187	0.000169716
cg01212975_rs12121617:156685732:C:A	0.0199496	0.604751
cg01215169_rs9590430:114854898:C:T	0.000138523	2.66668e-07
cg01218619_rs34161465:25083076:AAAAC:A	0.000933036	1.27412e-05
cg01220345_rs115181170:25149034:A:G	7.57131e-06	6.20759e-07
cg01221157_rs3095511:8798537:A:G	0.00703616	2.71254e-06
cg01221209_rs72704802:554211:C:T	0.00653101	0.00832525
cg01225037_rs664715:130099496:A:G	0.0016253	5.81219e-05
cg01225452_rs13141488:48981658:G:C	0.00018896	0.00580516
cg01227558_rs12658750:166710986:A:G	0.000161557	2.51245e-08
cg01228410_rs6868535	0.00134959	0.288636
cg01228854_rs7895884:17046804:G:T	0.0387101	0.0080496
cg01229868_rs1494645	0.0100751	0.00617089
cg01231183_rs74002707:79915907:G:A	0.00104163	0.000862393
cg01233397_rs218623:37751256:G:A	3.36915e-05	0.184722
cg01234757_rs68176788:65140675:A:G	0.00513792	0.0624143
cg01234950_rs151112443:122796829:GC:G	0.000539531	0.147161
cg01235583_rs28690281:995840:A:C	0.00763181	0.0586273
cg01236205_rs10173715:9817255:T:C	0.0278749	0.719352
cg01236616_rs7174:121017171:A:G	0.000387505	0.42999
cg01238395_rs557536:72590731:G:A	1.43465e-07	0.00112265
cg01239044_rs4815408:25346678:C:T	0.000335794	0.120484
cg01239922_rs34493940:197748:G:T	0.0125488	0.252804
cg01240599_rs3888976:67417510:C:T	7.72963e-10	1.05381e-09
cg01242456_rs2289855:53545424:A:G	0.0396701	0.00884065
cg01242976_rs74587064:101835375:G:A	0.0193764	0.00193946
cg01244946_rs61968460:99242645:T:A	0.0246105	0.147453
cg01246665_rs8039403:93255929:A:C	0.0262023	0.511538
cg01246881_rs28544423:20359633:C:T	0.0387942	0.212698
cg01246982_rs9277732:33092196:C:T	5.20535e-05	0.000313719
cg01247948_rs1382840:5296526:C:A	3.09621e-07	1.90461e-07
cg01248801_rs889688	0.0374921	8.54705e-06
cg01248928_rs2530740:156400421:G:A	0.00446327	0.0017572
cg01251548_rs7484027:17368381:T:A	0.0206115	0.00145832
cg01252219_rs7966820:110302270:C:T	8.48155e-06	8.94671e-07
cg01252726_rs2548611:53818895:T:C	0.0259566	0.383385
cg01254707_rs13408661:102955082:G:A	0.0421981	0.65496
cg01256391_rs1494932:19024276:C:T	0.0295479	5.40802e-05
cg01256665_rs2312549:69958944:G:C	0.0122427	0.055744
cg01256987_rs7298106:42534491:C:T	1.82151e-05	0.0124479
cg01258949_rs7931260:47088303:T:C	0.0323364	0.437259
cg01259521_rs7199342:1715454:T:C	0.00218808	0.811486
cg01262865_rs3784938:75274235:A:G	0.0191642	8.97584e-05
cg01262913_rs9976360:38587860:C:T	2.3954e-05	0.000381277
cg01267899_rs58539375:25164794:CTCCCAA:C	0.00986018	0.436079
cg01269546_rs6789402	0.00516439	0.842579
cg01272851_rs10774824:110087016:A:G	0.00341656	0.00112425
cg01276562_rs35124791:69400207:T:G	0.00050568	0.000188648
cg01277410_rs4722771	0.0041528	0.314432
cg01278093_rs7923781:5904760:T:C	0.000926369	0.00252479
cg01278769_rs914272:232318115:T:C	0.0221686	0.185533
cg01281435_rs4810083:56120271:T:C	3.74943e-06	3.17234e-06
cg01281539_rs533063:45147316:C:A	0.00195268	0.00223136
cg01282852_rs10833196:19953458:T:C	1.13649e-05	0.0121343
cg01284854_rs297817	9.77477e-06	4.442e-10
cg01287936_rs1684051:65198309:G:C	2.14769e-06	0.000128324
cg01289953_rs4922198:20301081:G:A	0.0143759	0.111005
cg01292999_3:69842644:G:GATGCTCATAGCATGCACCCTCTCCCA	0.000229432	1.6865e-05
cg01293189_rs773998:34768332:G:A	0.00866126	0.00183394
cg01293200_rs17668734:120914692:G:A	0.000263446	4.18671e-05
cg01293724_rs481736:104906710:C:T	0.00602245	0.0121973
cg01295188_rs2230437:476353:C:T	6.77936e-06	0.00234244
cg01296215_rs276711	0.00873152	0.392451
cg01297210_rs67464137:66596150:C:T	0.00462245	0.0520272
cg01300105_rs16937783:72598621:G:A	0.0453545	0.649689
cg01301282_rs10909847:2883041:C:T	0.0105126	0.823509
cg01301538_rs2287314:49557482:C:T	1.11884e-05	0.000555787
cg01303246_rs1706812:45454773:G:A	0.0121528	0.000769647
cg01305200_rs7033437:116123302:A:C	0.00277277	0.0400769
cg01307606_rs11706197:196270230:G:A	0.0280175	0.0604724
cg01308806_rs4807564:4268402:C:T	0.00602713	0.00983258
cg01309395_rs3116998:33097231:C:T	7.56843e-05	1.25337e-07
cg01311181_rs9614208:44568078:G:A	0.0417458	0.435459
cg01311841_rs34433967:2223052:CCT:C	0.00574965	0.398114
cg01313176_rs11009924:35051336:C:T	2.13666e-06	8.72119e-08
cg01314568_rs2315988:57825058:A:G	0.0459107	0.895107
cg01317388_rs3848542	0.000588277	0.143873
cg01317456_rs16931759:54383889:C:T	0.00757929	0.15039
cg01320298_rs34017774:15164562:C:T	0.0301245	0.00979904
cg01320322_rs9974787:27205751:A:G	2.07448e-06	0.000218197
cg01323862_rs1406431:71193821:A:G	0.0360912	0.413563
cg01325448_rs7088062	3.55144e-05	1.05431e-05
cg01331062_rs10085287:2444953:C:T	0.0359281	0.0624466
cg01332054_rs148745262:74495555:TTG:T	0.028104	0.00197369
cg01332959_rs11950646:138714474:G:A	0.0048896	0.329264
cg01334159_rs1291090:35468266:A:T	0.0357331	0.366941
cg01335557_rs1766059	0.0373212	0.00173147
cg01336696_rs2543501:9210959:T:C	0.0143942	0.443586
cg01338139_rs7497062:38987152:A:G	2.26788e-09	0.000205859
cg01338430_rs11645818:2958209:G:C	0.000803493	0.585263
cg01339111_rs1984541:6292072:G:C	1.45872e-06	0.000771456
cg01339558_rs56733656:168142238:A:C	0.0258812	0.860649
cg01342115_rs5002435:134039090:A:G	0.0122745	0.331069
cg01343770_rs9906415	5.81496e-06	0.000690827
cg01345055_rs2242236:779610:T:C	0.00396763	0.0144799
cg01345157_rs35665639:85112773:A:C	3.04354e-08	2.90908e-07
cg01346636_rs7322391:96138012:G:A	0.000108004	0.00549761
cg01350293_rs55688542:128297959:C:T	8.81596e-05	0.000118394
cg01355046_rs3771036:206587671:G:A	0.000727172	0.0550517
cg01355876_rs34365565:131283541:GA:G	0.040346	0.647376
cg01356866_rs9405853:5594080:A:G	7.71241e-08	5.99207e-08
cg01358522_rs2281774:46911290:C:T	9.36486e-07	0.000360234
cg01362149_rs4983579	0.0240896	0.206094
cg01362241_rs12422409:117925801:G:C	0.000403645	0.00859684
cg01362696_rs1933444:63339044:G:A	0.00911462	0.0461833
cg01363198_rs12636613:134879121:A:G	0.0378442	0.27433
cg01363603_rs557759:34932163:C:A	0.000175991	0.00236777
cg01364851_rs13116464:17803618:C:T	0.0180258	0.432762
cg01365668_rs1342544:33168689:A:G	0.000457508	0.110767
cg01366882_rs145818012:59925769:GCC:G	1.23186e-06	0.000348747
cg01367324_rs2278004	0.0348814	0.176138
cg01369479_rs9917168:134531553:A:G	0.0189196	0.526748
cg01369914_rs28650790:55861464:C:T	0.00643661	0.00059264
cg01370334_rs12992556:3506519:C:T	0.0033359	0.0176352
cg01370440_rs34595884:8796572:T:TG	0.000848517	0.00166505
cg01371842_rs221247:157327528:C:T	2.87553e-08	8.04385e-09
cg01376180_rs6550456:37181995:A:G	0.0355704	0.00326981
cg01376451_rs2480491:92157710:T:G	7.78853e-07	6.03815e-06
cg01381765_rs1250563:81047383:G:C	0.0252066	0.69148
cg01382406_rs36016219:65869443:G:C	0.000937117	0.276989
cg01384254_rs6925188:169563337:T:C	0.00520709	0.0212515
cg01386782_rs78877137:41059147:A:G	0.00132437	0.00167214
cg01388757_rs6707517:102089878:C:T	0.0120199	2.3504e-06
cg01389428_rs7200372:11592577:T:C	0.00013513	5.78499e-05
cg01391022_rs10743186:122356436:C:T	0.00516019	0.0424427
cg01391193_rs1168703:54897346:A:G	4.46728e-07	5.31157e-05
cg01391631_rs10038253:75472207:G:A	0.00150763	0.206418
cg01392867_rs8060853:30403858:A:G	0.0434386	0.000570163
cg01393736_rs78558427:48273995:C:A	0.000486999	1.62637e-10
cg01394884_rs11725282:186957112:T:C	0.00523152	0.00279772
cg01395261_rs10854162:18257988:A:C	0.0110256	0.186346
cg01396387_rs4597315:82652931:T:C	0.0277552	0.573005
cg01397395_rs12914098:77823013:C:T	1.182e-08	7.81771e-11
cg01399826_rs115396366:52016409:G:A	0.00522922	1.10913e-05
cg01401370_rs565070:35054586:G:A	1.95001e-05	0.000552649
cg01401694_rs10749692:54348138:T:C	0.0414105	0.0645697
cg01403005_rs2601203:90958129:T:G	2.58505e-08	9.61421e-05
cg01403660_rs1551306	0.0115559	0.0626428
cg01404063_rs1194512:54009538:T:G	0.0109203	0.0631081
cg01405242_rs72728277:131699407:T:C	0.0209905	0.804174
cg01405910_rs17385236:27587944:G:C	9.39057e-05	0.0163936
cg01406080_rs34164558:42876434:T:G	0.0286134	0.595493
cg01408926_rs8113231:49907462:G:A	1.76602e-05	8.17332e-05
cg01409448_rs17000211	0.0147373	0.726983
cg01409498_rs2161245:41421517:G:A	0.000367427	1.87247e-05
cg01410953_rs36000343:70419905:CG:C	0.0123686	0.10183
cg01412400_rs2280146	0.0499496	0.0390994
cg01412654_rs4362702:12337163:C:G	0.000878621	0.655173
cg01412907_rs111508230:155153537:C:T	0.0318196	0.585623
cg01413289_rs6966715:76062644:C:G	0.000254294	0.000265093
cg01413481_rs2853916:31275246:G:A	0.000239713	8.17812e-05
cg01413698_rs59601286:7237106:A:G	0.0240892	0.200227
cg01414572_rs1479482:5241385:A:G	0.0131	0.00274992
cg01414857_rs2363279:1096143:A:G	0.000364281	0.0151197
cg01415857_rs12670893:158045556:T:C	0.018954	0.25957
cg01417401_rs11170170:52936453:A:G	9.24003e-05	0.000115592
cg01417625_rs10911282:183184068:T:G	0.0074574	0.000849996
cg01418086_rs2993987:28800170:C:T	0.00177495	0.000799822
cg01418188_rs1466045	0.000273173	0.224954
cg01418322_rs16942051:86786074:T:C	0.0233323	0.0619476
cg01422293_rs8050957	0.000147686	0.00374913
cg01423110_rs4244578:40702256:T:C	0.0110898	0.638875
cg01423251_rs9276760:32773102:G:T	4.1711e-11	5.9376e-06
cg01425348_rs17590070:30950986:G:A	0.0162814	0.773885
cg01425763_rs6005588:28115051:T:C	0.00567748	0.0170954
cg01426475_rs73073209:22392439:G:A	0.000181401	0.000217879
cg01427815_rs6702462	2.26154e-06	8.05158e-10
cg01430863_rs6561169:44844238:C:T	0.0160395	0.588027
cg01434302_rs10087009:3265166:G:C	0.00894598	0.735302
cg01434465_rs58669315:167305038:C:G	0.0459519	0.728263
cg01434559_rs7128041:8294488:T:G	0.0316612	0.865652
cg01435315_rs79308344:72344095:T:TG	0.00599291	0.486723
cg01435493_rs148738236:73593429:T:A	0.0218801	0.67067
cg01435643_rs72663505:113691416:G:A	0.000742089	0.0329559
cg01436746_rs62386114:136104597:T:C	0.00944965	0.15133
cg01438056_rs35147120:90765104:A:G	0.0016404	0.0144393
cg01439409_rs4867585:169581006:T:C	0.00214048	0.211524
cg01442212_rs760067:53044703:C:A	0.0119637	0.594353
cg01443755_rs10748171:41220992:C:T	0.0459989	0.68285
cg01443852_rs633816	0.0208901	0.0228614
cg01444720_rs1242778	0.00159111	0.00066385
cg01444797_rs4648657:2560735:A:G	0.0357316	0.424395
cg01446044_rs7546219:13952814:T:C	0.0477346	0.495475
cg01446958_rs1527555:39792876:G:T	0.000395406	0.0136765
cg01447344_rs11577096	0.0019091	0.0102968
cg01447860_rs12155110:141950781:A:G	0.00019112	0.000579404
cg01449432_rs2061235:132268241:G:A	0.000319747	0.421482
cg01457015_rs557994:4351746:C:T	0.00170589	0.000169271
cg01460430_rs7812820	0.0376186	0.715412
cg01460957_rs6672407:209331470:G:T	0.0235342	0.856086
cg01462727_rs2296241	0.0486581	0.108394
cg01464186_rs1203426:52190325:A:T	0.000211905	0.0226507
cg01467481_rs13415738:122042750:A:T	0.0384411	0.000124431
cg01469040_rs11134653	0.0188034	0.722296
cg01471232_rs7106690:423699:C:T	0.0424449	0.849315
cg01473942_rs13108602:41209164:C:T	0.0171354	0.572767
cg01475684_rs4750532:14619959:A:C	0.0086993	0.411233
cg01477379_rs228887:64442174:C:T	0.030714	0.0580252
cg01477838_rs8125868:25324410:A:G	0.0142436	0.361986
cg01478482_rs11074485:21161439:A:G	0.0205922	0.611748
cg01479105_rs56953688:241209072:C:T	0.0416835	0.0613079
cg01480180_rs34899057:90904993:G:C	0.0396522	0.866762
cg01481224_rs73093043:47763192:C:T	0.048217	0.00152352
cg01481699_rs59998884:45618114:T:C	0.00266983	0.00427095
cg01481900_rs2189712:48455985:A:T	0.00267282	7.06453e-08
cg01482676_rs13255609:121352146:A:G	0.017934	0.00857939
cg01483184_rs1874520	0.000107969	4.02958e-05
cg01484296_rs187693358:6789318:G:A	0.00140472	0.00737914
cg01484574_rs1813000:28251301:C:A	0.00877995	0.0263684
cg01488679_rs75146457:95320483:C:A	0.011695	0.0225067
cg01492523_rs35400571:155417059:T:G	0.0183162	0.606672
cg01493727_rs685127:6001014:G:A	0.0376029	0.197853
cg01493956_rs859229:15795350:C:T	0.013836	0.637722
cg01494082_rs11088470:40689162:A:G	0.000196537	2.15137e-10
cg01496891_rs2155151:92068437:C:T	0.0465787	0.837806
cg01497589_rs6084432	0.0358353	0.555231
cg01497747_rs688874:130084507:G:A	0.0159592	0.00415883
cg01498219_rs35957220:2812632:C:G	3.09683e-07	0.0095437
cg01502367_rs111715984:135094287:G:A	0.0489761	0.827805
cg01503218_rs7983905:50266544:A:G	0.048261	0.7637
cg01504030_rs4336442:38146446:A:T	0.000169487	1.31318e-06
cg01505556_rs2844776:30171827:T:C	0.0187654	1.61542e-05
cg01510278_rs12928454:11446647:A:G	0.0437181	0.0160062
cg01513978_rs2236317	0.00280662	0.00655487
cg01516841_rs34899775:79402765:A:G	8.42352e-05	2.03382e-05
cg01517571_rs12136592:55098366:T:C	1.5514e-05	4.39212e-06
cg01517750_rs13251510:10916974:A:G	0.0468228	0.0453352
cg01518970_rs7216106	3.84876e-08	5.71966e-05
cg01520402_rs4683724:142792341:A:G	3.58739e-06	4.49915e-05
cg01520554_rs67827256:202140799:TGTGCCACCTG:T	0.0341136	0.539924
cg01520578_rs35457902:41529861:G:A	0.0228223	0.051708
cg01521015_rs2128162:14298264:T:C	0.00179179	0.128631
cg01522006_rs11929498:129329292:C:T	0.00362777	2.14001e-05
cg01524754_rs5067:11905981:A:G	0.0067181	0.00515132
cg01527115_rs11781239:11271200:G:A	0.0192358	0.338321
cg01529201_rs4819867:20136379:C:A	0.00160753	0.224416
cg01530082_rs2071469:32784783:C:T	0.00602587	0.00286455
cg01532746_rs4815830:5504777:C:T	0.000502102	0.0235345
cg01533425_rs34241327:8159910:C:T	0.0402285	0.150975
cg01534271_rs2235409	0.00697504	0.00010944
cg01536599_rs2064733:1018350:T:C	0.0400832	0.599572
cg01536803_rs4909119	0.0258208	0.0606129
cg01541378_rs709093:191462300:T:C	3.5215e-05	0.00389754
cg01542899_rs4422754:56430582:G:T	0.0314235	0.898876
cg01543893_rs34581209:26441219:G:A	0.00151707	0.262901
cg01544270_rs9414737:140303450:T:C	0.00576395	0.810049
cg01544890_rs12748062:183962308:C:T	0.00564891	0.036834
cg01546752_rs6967018:3133584:G:C	0.0479678	0.351853
cg01549141_rs56190856:5297149:T:C	0.00600452	0.329937
cg01550148_rs2617258:134738412:G:A	0.0409399	0.885478
cg01551441_rs3922246:158472899:A:G	0.0387308	0.0906473
cg01553653_rs5756487:37416800:A:T	0.0185574	0.631432
cg01556294_rs9822292:4464248:G:A	0.00068302	0.126307
cg01556466_rs1159040:31152578:T:C	0.0025938	0.289858
cg01557694_rs4767546:117894929:C:T	1.36204e-06	0.760116
cg01559259_rs66798082:45692479:G:A	0.0025331	3.08188e-05
cg01560476_rs12925982:24752877:G:A	0.000411874	0.0567393
cg01560773_rs75076539:47431627:TGTGTGTGC:T	0.0182869	0.663457
cg01561092_rs4785204:50103734:C:T	0.000782475	0.00113733
cg01562293_rs145496390:29216517:ATTTTATTTTTAT:A	0.0494872	0.146589
cg01562603_rs67503764:31656305:CTG:C	0.0252773	0.0924432
cg01564640_rs7259067:41124931:C:T	0.00119949	0.0646361
cg01565145_rs7303000:750401:A:G	0.00493756	0.405296
cg01565905_rs1045002:55818517:T:A	6.60829e-06	0.0447322
cg01566830_rs8015909:35810971:G:A	0.0224835	0.528724
cg01566965_rs6857275:174454242:A:G	3.2282e-06	0.36173
cg01571842_rs1675380:57944507:C:G	0.00467594	0.186844
cg01572891_rs677348:4184934:G:C	8.98758e-08	0.00303317
cg01572942_rs13204417:169575355:G:A	0.00466637	0.0573483
cg01573661_rs146857244:21815668:AC:A	0.00624243	0.0910093
cg01574788_rs374907884:12181164:AGAATCGCTTGGAGGCAGGC:A	8.81268e-07	7.36863e-06
cg01576078_rs3846875:37623885:T:C	0.0198662	0.6152
cg01577414_rs10734123	0.00694295	0.389792
cg01578764_rs34743661:1023995:A:AG	0.0456887	8.52612e-06
cg01578839_rs1054713:51323501:A:G	0.000248301	0.718025
cg01579024_rs7737600:170286530:T:C	0.00443896	0.0132523
cg01580164_rs12617997:747060:A:G	1.81679e-07	1.26971e-05
cg01580578_rs6956853:156889975:T:G	0.0257807	0.00253917
cg01582587_rs62063276:44036408:T:G	0.0032611	0.0534595
cg01585743_rs12293222:116565309:G:A	0.0324656	0.696697
cg01585852_rs738807:24234245:C:T	0.0487437	0.092471
cg01588581_rs10177736:241824529:C:T	1.73806e-05	0.0169943
cg01589543_rs11769827	0.0134398	0.651549
cg01589996_rs79905107:81738439:A:T	0.00463554	0.0954937
cg01589998_rs12370035:109727036:T:C	0.0482026	0.271011
cg01595237_rs6020772	0.00651587	0.0210125
cg01596325_rs413110:113413755:C:T	0.000200549	0.000588257
cg01596554_rs383068	3.26883e-06	4.21674e-06
cg01598377_rs13138275	0.00484276	0.399982
cg01598651_rs76868008:126204271:G:A	0.0409135	0.821262
cg01599099_rs200347874:66657369:A:AATCATTT	0.000478078	0.0219387
cg01600968_rs4584472:7632212:T:C	0.037073	0.000667754
cg01601105_rs10927866:16175317:C:T	0.0175493	0.523435
cg01601279_rs7857021:129237614:G:A	0.00641055	0.0141507
cg01602139_rs10947623	0.00615625	0.000103686
cg01602960_rs7110194:44021038:C:G	0.0293407	0.523513
cg01604404_rs10177796:237464585:G:A	0.0462302	0.00570715
cg01607625_rs9276842:32839628:G:A	0.0389048	0.347099
cg01609247_rs11057532	1.03727e-07	0.00581447
cg01612182_rs6688660:156597892:C:T	0.00376835	0.00192123
cg01612681_rs11022157	0.00829273	0.453879
cg01613557_rs4851520:102610275:G:C	0.0196488	0.000314736
cg01615050_rs1165170:25884664:A:C	1.67159e-08	2.84368e-09
cg01616906_rs71531825:134061764:C:CTCTA	0.0196775	0.318382
cg01617876_rs2824538:19276031:A:G	0.0169352	0.227469
cg01620868_rs72641820:41044219:G:A	0.0338679	0.281383
cg01623747_rs10927764	0.00898036	0.472096
cg01624173_rs175706:75976200:G:A	0.0156675	0.000460559
cg01625202_rs1034297:85302983:C:T	0.00902892	0.00160102
cg01625851_rs7253204:33941504:C:G	0.0170529	0.483075
cg01626341_rs4947340:32435338:C:T	0.000904898	0.000577975
cg01627594_rs56397742:159232962:T:TAAAAGAG	3.27846e-05	0.00466372
cg01628961_rs5992962	0.0450737	0.411644
cg01629329_rs6050906:2632673:A:G	0.0201425	4.81189e-08
cg01632425_rs8036260	0.001571	0.20574
cg01633216_rs13119521:154005431:C:G	0.0438062	0.0308609
cg01633359_rs3756663	0.000475889	1.82407e-06
cg01636354_rs1498730:134068750:T:C	0.00408713	0.520827
cg01637563_rs3917572:94929190:A:G	0.0266011	0.00111028
cg01640287_rs9318074:24419999:A:G	0.00800845	0.00520106
cg01640727_rs62063276:44036408:T:G	0.00211919	0.000102746
cg01641514_rs2285935	0.0483316	0.566513
cg01642733_rs3850746:17787536:A:G	2.98155e-06	8.64764e-05
cg01643325_rs35008079:39036654:A:G	0.0418357	0.81931
cg01644791_rs7997785:99127985:T:A	0.00371193	0.18471
cg01645676_rs75280240:1058511:C:T	0.0378719	0.790576
cg01647560_rs67463881:83410061:G:A	0.00850592	0.0168658
cg01647834_rs4676856:72146320:T:A	2.60882e-05	0.000290466
cg01648578_rs9831081:45230885:A:G	0.0162684	0.000189075
cg01656750_rs2896941:57772492:A:T	0.0492928	0.00015803
cg01657179_rs5875500:34197219:G:GT	0.00701962	0.051714
cg01658782_rs56251934:28098763:G:A	0.0191953	0.108882
cg01660114_rs1039666:83625827:C:T	0.00743029	0.00485282
cg01661732_rs11306634:96694952:GA:G	0.025063	0.648858
cg01663563_rs9745131:90776154:G:T	0.0109867	0.103781
cg01663953_rs1056194:86133784:C:T	6.76962e-05	0.0139501
cg01666490_rs6982001	0.000396892	0.0548177
cg01667575_rs2342505:4175710:G:A	0.00507706	0.0152543
cg01668054_rs2068856:111297299:C:T	0.00632426	0.177352
cg01669948_rs6458110	0.0425884	0.322596
cg01671590_rs11172222:57841863:G:A	0.000331827	0.0292691
cg01676766_rs1075689:31298045:C:T	0.0226111	0.15719
cg01678468_rs7112834:3400820:A:G	0.0161239	0.21165
cg01680288_rs11871473	0.00185935	0.161836
cg01680418_rs11086592:55696307:G:GC	0.00184123	0.00295747
cg01683270_rs35705922:8142503:G:A	0.0270314	0.00395961
cg01683605_rs34968499:86627604:A:G	0.0253265	0.00474947
cg01684810_rs58964:46143437:A:G	0.0267695	0.433892
cg01685353_rs7164321:40675329:A:G	7.11236e-05	2.30046e-05
cg01685636_rs564499	0.0288085	0.000133556
cg01688263_rs419524:56537774:A:G	0.0113059	0.00575365
cg01689239_rs10875765:48583632:T:C	7.25571e-06	0.000192418
cg01689583_rs13317855:122104234:T:A	0.0489583	0.499192
cg01689653_rs8068249:1067920:T:A	6.12599e-10	2.5625e-05
cg01691710_rs142134560:49292155:CTT:C	0.000231799	0.326703
cg01695620_rs903703:58128302:C:A	0.000525861	0.00193552
cg01698457_rs1005542:104358152:G:A	0.0158509	0.549027
cg01698579_rs113308482:112823453:T:C	3.71347e-08	1.6242e-05
cg01698714_rs7741565	0.0435229	0.295332
cg01698763_rs4444347:71745491:A:T	0.0123665	0.0502219
cg01698854_rs2550302:56392932:C:T	0.00800158	0.450226
cg01698880_rs149616205:68834362:T:TG	0.0127351	0.266463
cg01699148_rs9532433:40352671:C:A	0.000171489	0.00319354
cg01699998_rs702874	0.0213119	0.508147
cg01700582_rs542930:30248822:T:A	4.75749e-05	0.000504401
cg01702330_rs5875458:33688501:CT:C	0.00013082	0.00047393
cg01708407_rs2206161:10334969:C:T	0.0138653	0.802507
cg01712233_rs9323283:55840785:C:T	0.0324105	0.589661
cg01713201_rs1830642	8.12887e-06	2.6696e-07
cg01715299_rs947633:111528779:G:A	0.0424924	0.000121562
cg01716288_rs1322126:35538626:G:C	0.000224016	1.95283e-05
cg01716418_rs140107:30130516:C:A	0.0040535	0.101595
cg01718646_rs6010641:62392553:T:C	0.0215177	0.15043
cg01719995_rs62330278:144106009:A:G	0.000259186	0.163577
cg01722566_rs141201508:84972299:G:C	9.7976e-07	1.5105e-10
cg01722936_rs144421398:50252571:GA:G	0.0213757	0.544233
cg01723761_rs9557452:101195485:G:A	0.00127828	0.223789
cg01724683_rs12051886:75180827:C:A	9.90182e-05	0.000276194
cg01726265_rs7221186:4813685:C:G	0.000161314	0.000191575
cg01726295_rs13221729:135945871:G:A	0.0143847	0.0112349
cg01726448_rs10274145:1614261:T:C	0.00342616	0.00135139
cg01727105_rs200483151:85593365:AT:A	0.00164295	0.000564432
cg01729180_rs16970112:40271935:A:G	0.021181	0.00350078
cg01730433_rs2816029:18856937:T:C	0.000829971	4.90726e-07
cg01731562_rs1705773:34169875:C:A	0.0260542	0.657995
cg01731630_rs1428949:9947612:C:T	0.00299766	0.00231795
cg01731804_rs2641901:18787646:T:C	0.00961888	0.00585004
cg01733572_rs4782587:84202130:C:T	8.35889e-06	8.8321e-06
cg01735293_rs4977023:143653442:G:A	0.0485878	0.154551
cg01736243_rs227980:3289376:C:T	0.0323801	0.0222335
cg01736680_rs56885987:50652946:TG:T	2.88804e-06	0.00684617
cg01738128_rs7077054:122271479:G:A	0.00319793	0.106579
cg01739552_rs10819457:131776041:T:C	0.00648742	0.767439
cg01742263_rs11242462:138720108:C:T	0.00121591	0.00538803
cg01743873_rs28681202:834098:C:T	0.0309604	0.0929269
cg01744005_rs12697226:29803189:G:A	0.00277791	0.68088
cg01745119_rs2253193:52936706:A:G	0.0151469	0.140673
cg01745370_rs59698498:109057701:A:ATT	0.0345695	0.365859
cg01747364_rs1791687:66227184:G:C	0.0208947	0.0263657
cg01750172_rs2801500:12395832:G:C	0.0330432	0.810613
cg01750233_rs4737654:64500933:T:C	0.0010614	0.724595
cg01751168_rs5841761:48255483:T:TATA	0.0225216	0.121339
cg01751802_rs7246614:11310538:C:T	0.0304645	0.66706
cg01753188_rs12599030:77229776:C:T	0.0296207	0.853322
cg01753252_rs11648894	0.0376164	0.667949
cg01753382_rs2236847:21589666:G:A	9.67315e-05	0.000802067
cg01754534_rs28532847	0.000138803	0.00752495
cg01756827_rs2134618:47932047:C:T	3.1004e-05	0.000681468
cg01757068_rs9343336:76646085:T:C	0.0335341	0.728505
cg01758314_rs187693358:6789318:G:A	0.0010554	0.00816936
cg01759218_rs8015426:76815455:G:C	0.0410223	0.0697779
cg01759575_rs7393	0.0477061	0.667573
cg01761668_rs11868774:16385206:T:C	0.0475369	0.0127159
cg01764438_rs12446706:9165789:G:C	2.55989e-05	2.7104e-05
cg01764822_rs67701708:140916796:T:C	0.00445453	0.711095
cg01765152_rs10956403	5.55496e-05	7.63989e-05
cg01766301_rs146093423:27933176:CT:C	0.026901	0.728586
cg01767910_rs72457759:99256979:TTTTC:T	0.0406051	0.0505298
cg01768697_rs941900	0.0203175	0.0940963
cg01770044_rs9549053:40660954:G:A	2.09448e-11	4.20132e-08
cg01772980_rs10897230:61954602:G:A	0.0397658	0.376877
cg01774131_rs7825636:8578229:A:G	7.75576e-05	5.22094e-05
cg01774335_rs76828367:5288769:CA:C	0.00046234	2.81922e-07
cg01777121_rs472631	0.00132814	0.000739558
cg01777812_rs62304702:90118148:T:A	0.0101047	0.00148452
cg01777861_rs6837695:56015840:C:T	2.1682e-05	0.466416
cg01778465_rs3781370:105335156:T:C	3.10793e-08	7.23423e-07
cg01782276_rs1571292:41352545:G:A	0.0421055	0.209942
cg01784220_rs1077951	0.0416362	0.301146
cg01784408_rs373013140:101919447:CTGTCAGGAGACAGTTT:C	0.0333401	0.303602
cg01785605_rs1743287:900968:A:C	0.00433563	0.0169532
cg01787545_rs2297207	0.0223316	0.0101543
cg01788910_rs11700748	0.0230138	0.00563702
cg01790032_rs35154621:190280274:C:CA	0.000165233	0.000165701
cg01791544_rs13338700:781292:C:T	0.00667682	0.00669711
cg01794103_rs62011510:78332518:T:C	0.00307106	0.000397072
cg01794799_rs8013221:69923702:T:C	0.000252074	6.17424e-05
cg01795298_rs2241523:42127443:G:C	8.22767e-07	2.0005e-08
cg01795421_rs368048655:14425249:ACT:A	0.0032278	0.208308
cg01797371_rs112058931:195576719:G:A	0.00819116	0.0100959
cg01798266_rs2771122:153312644:A:G	0.0190385	0.0260111
cg01802295_rs3766177:1481348:T:C	0.0294131	0.735207
cg01802506_rs10781645:133342927:A:G	0.00107004	3.7787e-05
cg01803284_rs73121277:50577968:T:C	0.000379283	0.780252
cg01804934_rs73739674:33037865:C:T	0.0413089	0.253848
cg01805404_rs3856595:66492604:G:T	0.0188055	0.61895
cg01806427_rs469053	0.00372556	0.684937
cg01806921_rs5762273:28011484:G:T	0.0398309	0.472404
cg01807303_rs4471449:73501356:C:T	0.00675049	0.275801
cg01807702_rs4239070	0.000705655	4.94997e-06
cg01809281_rs10182357:24153132:T:A	0.027927	0.282354
cg01810329_rs11644528:89227806:G:A	0.000439992	3.20835e-05
cg01810471_rs6577046	0.0463311	0.772646
cg01812571_rs28568812	0.00219251	6.83166e-06
cg01812822_rs2396105:8571530:A:G	0.0397915	0.548963
cg01814130_rs186279414:118888208:G:C	1.97012e-06	0.00820367
cg01815626_rs830376:52888316:T:C	0.000376902	0.0105083
cg01816186_rs11890160:15310464:G:A	0.00602117	0.305097
cg01818063_rs10774911:110262660:G:C	0.000573921	0.0132015
cg01818215_rs56382559:59993237:A:G	0.00515868	0.000572776
cg01822938_rs113583666:88449459:G:A	0.00197337	0.00433778
cg01822942_rs4986118:80809565:G:C	0.00926481	0.457577
cg01823718_rs4145287:24014855:A:G	0.0219061	0.101748
cg01825664_rs2691272	0.000165161	0.00426965
cg01827426_rs11133905:1761214:C:G	0.00620131	0.761412
cg01827803_rs9375797:131345517:G:C	0.0280297	1.98167e-05
cg01828813_rs9277928:33128460:G:T	0.0177092	0.345982
cg01829399_rs6022347:51847746:G:C	4.27323e-10	1.00677e-06
cg01829436_rs9480643:106578164:G:C	0.0476513	0.755571
cg01832371_rs62354611:36601369:G:C	0.00159959	0.0019535
cg01832549_rs11590840:19779673:T:C	0.0030262	4.54905e-05
cg01832926_rs11853224:66836740:C:G	0.0139963	0.833173
cg01833436_rs12125812:243645076:A:G	0.0405095	0.714787
cg01833923_rs16947151:47290638:A:G	0.0166849	0.0141168
cg01837375_rs7508226:13032867:A:G	1.00882e-06	0.000531055
cg01839934_rs749045	0.000171631	0.522544
cg01840345_rs73557843:133771499:C:T	0.00177816	0.421732
cg01842321_rs9262616:31022195:C:T	0.0444589	0.138391
cg01842856_rs3743041:81270240:T:C	0.0280522	0.0305106
cg01844936_rs1719465:72576391:T:C	0.0372753	0.039772
cg01847122_rs35930524:25094332:C:CT	0.000110061	0.0363524
cg01847274_rs2084920	0.000955043	0.0855958
cg01850179_rs2033493:10340854:A:C	0.0251028	0.00195277
cg01851573_rs11774860:8651879:C:T	0.000141397	1.98117e-05
cg01854591_rs149871778:9098995:G:GAAC	0.0327571	0.856198
cg01857171_rs11151954:72134768:A:G	0.0125312	0.0375838
cg01861096_rs13057255:19281759:T:C	0.0348208	0.51433
cg01861647_rs61162921:51129238:GTTTTTTT:G	0.000556925	0.0307139
cg01867930_rs211300:32345138:A:G	0.0489788	0.604142
cg01868499_rs1555434:89419143:G:C	0.000556437	0.000152588
cg01869093_rs138349174:95520300:C:CA	0.000833634	0.00188492
cg01869605_rs5900656:128142369:GT:G	0.00806554	0.122616
cg01870580_rs32059:156069282:G:T	0.0283717	0.841354
cg01870657_rs77733744:52344004:G:A	0.0346704	0.283659
cg01872224_rs2077055	0.000132283	3.75791e-06
cg01874407_rs62224976:49063608:A:G	0.00441041	0.171012
cg01874478_rs4890812	0.0370576	0.0642412
cg01876490_rs7244243:63429906:C:A	1.62018e-06	0.014165
cg01877450_rs192143197:97911020:C:T	0.0044161	0.000984541
cg01878722_rs2243523	2.64092e-06	6.90499e-05
cg01878963_rs10562732:112154317:TTACA:T	0.00300926	0.0185162
cg01879192_rs11832287:6291307:A:G	0.00901828	0.00260371
cg01879420_rs1279593:111204367:C:G	6.94384e-08	1.74755e-06
cg01881308_rs2235632:1393020:G:A	0.0142643	0.00560961
cg01887506_rs1897120:222313856:C:A	0.00579705	0.0824476
cg01888996_rs7672249:68871586:C:T	0.0201212	0.88969
cg01889025_rs12600361:75087721:C:T	0.0140588	0.000204158
cg01892689_rs2164548:97648543:A:G	0.00955933	0.176248
cg01892994_rs7694312:185916817:T:C	0.0184755	0.00316604
cg01894877_rs12296335:56991383:T:C	0.0271071	0.559815
cg01895805_rs61630703:141273359:A:T	1.1555e-05	8.21125e-05
cg01898748_rs11173133:60152867:C:T	0.00274093	0.0110607
cg01904194_rs10169870:241835786:G:A	0.000139493	0.0125496
cg01905229_rs10554939:153281477:CAT:C	0.0492902	0.58239
cg01905478_rs11249169:25043293:C:T	9.12509e-06	0.00355517
cg01906119_rs66472415:44206455:G:GA	0.010722	4.80173e-06
cg01906237_rs2812497:71419527:G:A	4.12391e-06	2.44081e-06
cg01907042_rs12141708:224705368:T:C	0.0421428	0.700633
cg01907156_rs35038457:97853006:G:A	0.0280155	0.462465
cg01911494_rs7196136:935567:C:T	0.00972272	0.563438
cg01912578_rs3790117:56397567:G:C	0.00173203	0.0621253
cg01914162_rs2072133	1.08007e-10	5.99295e-09
cg01915433_rs1876736	0.000123782	0.000617954
cg01915885_rs60252474:30004548:C:T	0.0265778	0.513641
cg01916088_rs4714479:41518807:A:G	0.0339767	0.806354
cg01916846_rs8063669:12697236:T:C	0.0417586	0.134622
cg01917321_rs57872363:20292623:G:A	0.000334347	0.000151347
cg01918001_rs12230975	0.0005161	1.09869e-05
cg01919309_rs11952919:178219042:C:T	5.39818e-06	0.00134176
cg01919618_rs2062893:10619317:T:C	3.03276e-06	0.137074
cg01922580_rs12914198	0.0018219	0.000935627
cg01923482_rs79924446:156471856:A:AG	4.99513e-05	6.90434e-05
cg01927072_rs268580:71477850:C:T	0.00013848	0.0382692
cg01927472_rs11885671:16205386:A:G	0.0413504	0.00418615
cg01928545_rs13124375:48982015:T:G	0.000945735	0.1102
cg01930074_rs6478871	0.0371181	0.775132
cg01930459_rs2013198:236571735:G:A	2.92824e-08	0.000128112
cg01932198_rs520129:72595554:G:A	4.40633e-05	0.000129074
cg01934149_rs16854783:231827371:G:A	0.00226509	0.0160238
cg01936671_rs62099085:12209502:G:T	0.00536015	0.00409417
cg01939668_rs5993838:19797211:A:G	0.0103501	0.0853515
cg01941243_rs12138074:227970556:G:A	0.000928576	4.91573e-06
cg01942825_rs621324:77772619:G:A	0.000835644	0.000168233
cg01943216_rs1447342:181060316:C:G	0.0205323	0.0272814
cg01944380_rs364530:75389267:C:T	0.00024278	3.71855e-07
cg01944987_rs4316702:62909751:A:T	0.0057044	0.00526713
cg01945427_rs10633382:90722259:G:GAAA	0.0356188	0.417529
cg01946850_rs7967301:94988787:G:A	0.000451656	0.00128766
cg01947066_rs8039276:74297332:C:T	0.0254865	0.64791
cg01947239_rs735955:1943120:G:A	0.000428504	0.000280119
cg01948566_rs35942003:29832909:G:A	0.00580544	0.0912747
cg01949520_rs2974246:48148054:G:A	0.017286	1.26863e-05
cg01950058_rs2190097:77038945:C:T	0.000207506	8.32459e-05
cg01950129_rs2238576:948358:T:C	0.0490479	0.0354164
cg01951128_rs3737036	0.000104281	3.85451e-05
cg01953456_rs6443950:183817727:A:T	0.0218521	0.0103961
cg01958405_rs6751847:71693189:G:T	0.00363701	0.110856
cg01959071_rs4838869:50713371:G:A	0.000634883	0.245852
cg01959123_rs1684051:65198309:G:C	5.84273e-08	1.24163e-05
cg01963933_rs34435810:10717490:A:G	0.00834629	0.300754
cg01964856_rs2072042	0.045463	0.0142929
cg01965463_rs34548365:151478897:T:A	7.70201e-05	3.94912e-05
cg01965984_rs13126086:7983837:T:C	0.000134291	5.30879e-06
cg01968256_rs2647166:17342735:T:A	0.013532	0.480998
cg01968605_rs6703180	0.0383987	0.732477
cg01968986_rs9874403:151157273:A:G	0.04855	0.0218929
cg01970383_rs56007209:177733328:G:A	0.000220828	0.00696355
cg01971258_rs201646027:22728026:GTGTGTT:G	0.0371645	0.734997
cg01972576_rs4736337	0.00248857	0.00013606
cg01973014_rs7259883:40911799:T:C	0.0465677	0.334878
cg01974249_rs76036945:106759830:GAATC:G	0.0129673	0.170311
cg01975684_rs7842882:125284385:A:G	0.0042984	1.06704e-07
cg01981158_rs35431262:104493269:AG:A	0.0334012	0.3412
cg01984298_rs7572912:231484085:C:T	0.00209102	0.000435807
cg01984323_rs2807587:126903936:G:A	0.0390161	0.2797
cg01984445_rs6572540:23029279:A:C	0.000572856	0.0398682
cg01984854_rs4843849:85879543:G:A	0.000180376	0.000179176
cg01985343_rs12985247	0.000787717	3.91527e-06
cg01987224_rs7516023:201085521:C:T	0.0116146	0.212057
cg01987637_rs2099945:18438642:G:C	0.0191347	0.562997
cg01988233_rs1141390	0.000328287	7.88431e-05
cg01988523_rs10849876:121836105:A:G	0.00958276	9.46561e-08
cg01988887_rs398701:90806732:G:A	4.83474e-06	0.0505821
cg01989133_rs6881245:130971781:C:A	0.0194286	0.908311
cg01990482_rs11160510:99793689:A:G	0.000657971	0.782298
cg01990695_rs9295035:168418806:T:C	0.0273634	0.151777
cg01991752_rs4072539:101005895:C:T	0.00526434	0.0753266
cg01992430_rs62049016:88614351:G:A	0.0028515	0.0301539
cg01994208_rs1220392:9906803:G:A	0.00148341	0.00136273
cg01994243_rs2570076:59081436:T:A	0.0348427	0.65557
cg01998806_rs79737432:64115983:C:A	0.0188504	0.471988
cg02000541_rs12077115:225924711:A:G	0.00129573	0.00950129
cg02003199_rs7838766:145586771:A:G	0.0121346	0.000395707
cg02005490_rs62337105:1955902:T:C	5.42519e-07	0.101857
cg02005870_rs10509329:72845874:A:G	0.00437321	0.0578993
cg02007021_rs1706937:64883864:A:G	0.0280119	0.00880241
cg02007745_rs36006565:41488828:G:C	0.000154952	2.6685e-07
cg02012338_rs4997690:187125426:C:G	0.00529313	0.000301239
cg02012594_rs9551715:20141198:C:T	0.0276085	0.686006
cg02013018_rs508395:122352637:G:A	6.24489e-05	0.000643558
cg02014797_rs9892365:59491384:A:G	0.028199	0.55778
cg02016407_rs2393042	8.27423e-06	4.53484e-07
cg02016764_rs3924113:38796255:G:T	0.0309657	0.537267
cg02018176_rs11941200:1369093:C:G	0.0175748	0.0188893
cg02018291_rs1808693	0.00463621	0.0271471
cg02019333_rs141789843:118884892:G:A	0.00215426	0.130534
cg02021288_rs36090551:11443873:G:T	0.000881017	0.00984605
cg02022224_17:39961555:A:AAACAAACAAACAAAC	0.0134507	0.0904636
cg02022289_rs7527518:23444276:A:T	0.00992962	0.361086
cg02022344_rs1438842:119628722:G:T	9.51667e-06	0.000540241
cg02023548_rs61887894:68756663:G:A	0.0284021	0.731212
cg02025573_rs56971516:26981813:C:CA	0.037568	0.764063
cg02025583_rs202309:10635724:G:A	0.021714	0.000238496
cg02027429_rs17169210:135169908:G:C	1.51659e-05	1.39528e-07
cg02027969_rs2483563:116330557:G:A	1.43577e-06	0.263295
cg02028568_rs6004268:25161574:T:C	0.0435237	0.123137
cg02030225_rs17500406:98905554:C:T	0.0117339	0.759118
cg02031121_rs11070875:52332868:C:G	0.0496537	0.0526997
cg02031597_rs7364173:50681029:T:C	0.033241	0.241324
cg02032970_rs3826528	0.000306245	0.0336964
cg02033182_rs4785649:89332421:G:C	0.0388571	0.708001
cg02038218_rs2884743	0.0477158	0.476814
cg02038690_rs4670038:15042747:G:T	2.88948e-06	1.63129e-10
cg02039634_rs12423631:132606886:C:T	0.0016668	0.199771
cg02039867_rs10882659:97510704:T:C	9.21213e-07	0.00356026
cg02041587_rs9364850:166882605:T:C	0.0123904	0.010635
cg02041641_rs131046:32980066:G:A	0.0177321	0.472646
cg02043622_rs7075277:134722022:A:G	0.034247	0.716872
cg02044966_rs28544970:63911073:A:G	8.9868e-06	0.149686
cg02045164_rs3829131:134564627:A:G	0.00108563	0.000222708
cg02045804_rs4789145:73135344:C:T	1.47052e-05	0.00934264
cg02049672_rs960230:42622479:A:G	0.0233686	0.00412692
cg02050512_rs34057414:38496256:G:A	3.98674e-05	0.000886312
cg02052154_rs12695504:127791388:G:C	0.0273053	0.420723
cg02053818_rs2432676:38401299:C:A	0.0373519	0.122545
cg02053920_rs3094196:31093947:A:G	0.000457647	0.0169095
cg02054252_rs12309940:50080339:C:T	0.00920984	0.67714
cg02054672_rs7963316:102327751:C:T	0.0175349	0.000939822
cg02056132_rs55832996:86428749:C:T	0.00670773	0.00420049
cg02058787_rs2281202:35862708:T:C	0.00576141	4.11146e-07
cg02061368_rs13405615:235980623:A:G	0.00313206	0.643429
cg02062816_rs2662774:163161020:G:A	0.00284106	0.214464
cg02063076_rs1046909	0.000266594	0.00033274
cg02063697_rs1626847:71110248:A:G	0.029524	0.301445
cg02064838_rs2347549:31908308:T:C	0.00204779	0.000428423
cg02065027_rs10892569:120270249:A:G	0.00280441	0.00856293
cg02066178_rs2813627:94109968:C:G	2.74721e-06	2.59476e-05
cg02068164_rs3756663	3.99172e-05	5.23172e-08
cg02068259_rs3804107:25608359:T:C	0.0147383	0.648015
cg02071172_rs750864:64427284:G:A	0.0466603	0.294014
cg02071546_rs8067800:17573539:A:G	0.048222	0.1911
cg02072170_rs813153:194407204:T:C	2.42343e-07	4.06467e-08
cg02072300_rs11247588:25990149:A:G	0.000645621	0.0386421
cg02073224_rs12119711	0.0308178	0.419568
cg02073796_rs7142572:89813903:G:A	0.00727074	0.0172067
cg02077265_rs2945506:47339798:G:A	0.0152941	0.000256789
cg02079584_rs351174:74528508:G:A	0.037578	0.13783
cg02084645_rs11041430:7557650:A:G	3.49424e-09	0.000355954
cg02084814_rs186314639:141731393:A:G	0.0259432	0.114416
cg02085119_rs16892237:120218914:G:A	0.0313034	0.18577
cg02086690_rs9436998:56765176:T:G	5.61112e-05	0.686909
cg02086790_rs3900804:374433:G:A	4.26649e-05	0.0030229
cg02086964_rs56091459:54955684:C:CCTGT	0.000178983	0.161499
cg02087289_rs6518351:45621939:T:G	0.0208292	0.689683
cg02088962_rs8030131:75979782:G:T	0.0448122	0.336144
cg02089367_rs200944:38150036:T:C	0.00827981	0.00303829
cg02090877_rs1932280:8473654:G:A	0.00015028	0.000309541
cg02094681_rs13184870:113663831:T:G	4.862e-10	2.64391e-06
cg02099420_rs144229407:410987:C:CAA	0.00154292	0.00205049
cg02099709_rs2839490	0.000317911	0.487418
cg02103696_rs8059973:90079534:A:G	0.0195887	0.121663
cg02112154_rs7094994:44199230:C:T	0.0141537	0.00155827
cg02114747_rs7150580:22899316:C:T	0.0287879	0.00018265
cg02116757_rs78625831:71854933:CT:C	0.00770024	0.179393
cg02118194_rs6509238	0.0323409	0.00598351
cg02118245_rs12297035:110578192:C:T	0.0414657	0.758394
cg02120831_rs56354005:154057030:A:G	0.0477007	0.619256
cg02126235_rs12884390	0.0328319	0.0189042
cg02126477_rs35951416:12970537:A:G	0.00772521	0.609781
cg02127209_rs11667965:35788385:A:G	0.00798539	0.593747
cg02127387_rs4134888:99714050:G:T	0.0474902	0.175117
cg02127689_rs9504549	0.0398147	0.22407
cg02128979_rs8075298:74682072:A:G	0.00203036	0.110519
cg02129127_rs6142938:60627723:A:C	0.00795427	0.126154
cg02129597_rs16965356:36615582:T:C	0.000460003	0.0368209
cg02131155_rs13110548:148981794:T:A	6.5839e-05	0.00789541
cg02131230_rs67173113:10289235:G:A	0.0479328	0.347259
cg02131349_rs792691	0.0381707	0.617312
cg02131995_rs35497966:35764965:A:C	3.80881e-05	0.00450983
cg02133383_rs6813110:942660:C:T	0.00576884	0.00109351
cg02133715_rs1237521:71295117:G:A	0.000926726	0.0129324
cg02134515_rs55897024:2556247:A:G	0.00917546	2.48179e-05
cg02134798_rs11157685:49949381:G:A	0.0345363	0.00069545
cg02136201_rs11246854:132061000:C:A	0.017981	0.102969
cg02139554_rs2576367:100689075:C:T	0.00288937	0.269253
cg02139846_rs12219271:81788033:G:A	1.41223e-09	0.0402754
cg02141393_rs13011075:68639313:A:C	0.0480945	0.0113848
cg02142792_rs1081618:101721475:A:C	0.00432403	0.00230065
cg02144793_rs11671151:41481829:G:A	0.0149955	0.696321
cg02145259_rs10890192:42871290:T:C	0.00105271	0.451594
cg02147617_rs6807133:45063765:G:C	0.000354176	5.67114e-07
cg02148091_rs967011:111585703:C:T	0.0323231	0.796176
cg02148353_rs4134809	0.0482547	0.0032639
cg02149227_rs10987461:129513010:C:T	0.0296926	0.565165
cg02149965_rs2249464:30888161:T:C	0.03091	0.122391
cg02156070_rs3820518:25985451:A:G	0.000516946	0.0172749
cg02157403_rs3824400:133734075:C:T	0.00901207	0.0990369
cg02157626_rs416571:29648941:A:G	0.0181502	0.000324044
cg02158486_rs139944565:48078583:TAAGTC:T	0.000161551	0.000180818
cg02159157_rs2057178:32364187:G:A	0.0214471	0.257729
cg02160083_rs12713018:49094244:C:A	0.0263549	0.0450129
cg02161900_rs2492903:28043143:T:C	0.0201241	0.803545
cg02161940_rs73816433:16463703:G:A	0.0489147	0.0150115
cg02163885_rs373730457:27729670:CTTTCT:C	0.00530494	0.089614
cg02164140_rs2093619:28295181:C:T	0.00200147	0.127814
cg02164266_rs9953794	0.000163839	0.000720001
cg02164627_rs6702254:206964952:T:G	0.0267713	0.685538
cg02165747_rs74703319:39161080:C:T	0.00565908	0.0175546
cg02166851_rs2844664:30815945:C:T	4.41663e-05	0.374278
cg02166981_rs1597847:215186612:A:G	0.00191527	0.0138343
cg02167713_rs12938981:79624866:G:A	0.0108773	9.73925e-05
cg02168442_rs7845479:102244261:T:C	0.000136144	7.40951e-05
cg02169705_rs34171425:107607160:TG:T	0.0404155	0.33945
cg02170784_rs1065368:1036860:T:C	0.0430788	0.0635858
cg02171725_rs3133659	0.00975387	0.0277143
cg02172531_rs11807462:78633616:A:G	0.0299706	0.600444
cg02173923_rs4813006:44769385:C:T	0.0200702	0.308793
cg02174251_rs1095999:51367350:A:T	0.00676034	0.88759
cg02175511_rs11282370:98377521:C:CCCCCTG	0.000408997	0.0748884
cg02177096_rs2609357:223173312:C:T	0.00762163	0.113407
cg02179492_rs2155449:69987170:C:A	0.00132677	0.209083
cg02179795_rs2956097:34910835:T:C	0.00649646	0.345892
cg02184280_rs4277437:49963679:T:G	0.0488459	0.287176
cg02184341_rs10741556:2272989:C:T	0.0201269	0.131286
cg02184744_rs3111349:89476302:T:C	0.00234462	0.296117
cg02186444_rs4788867:73127683:T:C	0.00040416	1.77781e-05
cg02193187_rs4786275:1580025:A:G	1.99321e-05	0.000154063
cg02196334_rs11002020:78873760:T:G	0.0178156	0.647523
cg02196730_rs55664603:80184171:G:A	0.0494382	0.0204346
cg02198932_rs35978632:132519783:A:G	0.0109632	0.810427
cg02199344_rs4485322:87830572:C:G	8.04059e-08	0.00142587
cg02199799_rs61839380:246129204:A:G	0.00116574	0.00769596
cg02200032_rs12046557:245280064:T:A	0.00233548	0.00179058
cg02200722_rs1230100:43480848:G:C	0.0201779	0.00819381
cg02201490_rs9933765:87586557:A:C	0.0141681	0.000426795
cg02201969_rs57454756:6958582:C:T	7.52623e-07	0.000156999
cg02202923_rs3008366:135040148:G:A	2.95225e-06	3.38225e-08
cg02203635_rs35394843:2593157:A:AT	0.00980079	0.630208
cg02204768_rs2029737	0.0414857	0.801165
cg02206980_rs2804916:13581844:T:C	0.0112595	0.117349
cg02208236_rs67194495:42566518:G:A	0.00108392	0.0356569
cg02209802_rs59961481:11321354:C:T	0.01459	0.254468
cg02210783_rs7746038:89743555:G:A	0.00872538	0.131437
cg02210934_rs4983574:105511929:G:C	0.000957144	0.000847285
cg02213365_rs10768059:34366667:A:G	2.94803e-06	1.04924e-06
cg02216946_rs10470675:38883140:T:A	0.000448503	0.0109231
cg02220008_rs10948523:13188121:G:A	8.7562e-08	4.60964e-06
cg02220965_rs4889619:31128615:C:T	0.0332395	0.133546
cg02221750_rs67472219:17385677:CT:C	0.031871	0.00358462
cg02222252_rs6946915:97711340:C:G	0.00527212	3.40182e-08
cg02222670_rs74380481:157753229:G:A	0.0444245	0.0123804
cg02223905_rs62246183:46720260:G:C	0.0402936	9.59683e-06
cg02225649_rs4602206:38995964:G:C	0.00616551	0.361269
cg02226672_rs4783558:68403966:A:G	7.53317e-05	2.11248e-06
cg02229288_rs4880766:1154019:C:T	0.000272842	0.0841419
cg02230426_rs73996914:69984092:G:A	0.00682387	0.000104813
cg02234032_rs11965794:6495031:G:A	0.0394851	0.445297
cg02237368_rs6970419:44094819:G:C	0.00982937	0.0219527
cg02238550_rs9889546:75735417:G:C	0.0430472	0.090446
cg02238834_rs904478:129522867:C:T	0.00244143	0.00177566
cg02239586_rs816941:62674593:G:A	0.0434523	0.318155
cg02239747_rs4876013:2483083:G:A	0.0214604	0.0088409
cg02243535_rs4458034:1916034:C:T	1.09995e-05	0.000446337
cg02248514_rs17484812:32838965:T:C	0.0199302	0.0380393
cg02249375_rs35202507:18934512:CAGTG:C	0.000259881	0.00213326
cg02250002_rs535787:84232697:A:G	0.0031612	0.00152728
cg02251754_rs59375744:28564765:CACAG:C	1.25477e-07	0.000788565
cg02252421_rs34139509:127906390:T:C	1.88475e-06	0.000412519
cg02254407_rs2008722:73366546:A:T	0.0269451	0.716188
cg02254812_rs35737316:204161534:C:T	0.000726174	0.303318
cg02256570_rs821168:68575160:C:T	0.0182333	0.257363
cg02258751_rs28396876:144487090:A:G	2.81074e-08	5.81345e-13
cg02258852_rs6546058:64421702:A:G	2.41292e-07	3.30409e-09
cg02259723_rs2304597:73052431:A:G	0.000515734	0.139894
cg02260576_rs57221013:2264251:C:A	0.0017141	0.047836
cg02262703_rs115670040:7682684:T:C	0.000690396	1.52779e-05
cg02267433_rs4959422:7002414:C:G	0.016114	0.602758
cg02269223_rs6008817	0.00199088	0.00161235
cg02271863_rs10510025:118650996:C:T	0.0484199	0.706938
cg02274103_rs12600845:78077714:C:T	0.0134936	0.105431
cg02276807_rs11146981:133024675:C:G	0.0319133	0.00261911
cg02279759_rs9506507:21096359:C:T	0.038189	0.590765
cg02279794_rs5809836:77949267:TG:T	1.65326e-07	3.76063e-07
cg02279987_rs6697886:1173611:G:A	0.0227161	0.61036
cg02280483_rs60600938:45836109:C:A	0.00157178	0.240522
cg02280486_rs10213357:173650845:A:G	1.89483e-05	1.88083e-08
cg02281400_rs551269:76720564:G:A	0.000918681	0.156447
cg02283796_rs66570840:57741835:T:A	7.0418e-07	0.0184974
cg02284625_rs6433596	0.00900619	0.00981482
cg02285907_rs4984975:959503:A:G	0.0258589	0.517192
cg02287146_rs36956:113666806:T:C	5.89811e-08	7.51247e-06
cg02287600_rs4944604:86321810:T:C	0.00216269	0.000478554
cg02288684_rs561553	0.0402579	0.290993
cg02289285_rs10927076:243958293:A:G	0.0052875	0.340712
cg02291224_rs11072077:69589762:G:T	0.017337	0.845595
cg02291357_rs17272796:17077268:C:T	0.0352589	0.300308
cg02292899_rs12618842:35645659:G:A	0.0246926	0.0653717
cg02293354_rs5016067:32719068:G:C	0.0292564	0.0010765
cg02293358_rs17805191:92359316:T:C	0.0117784	7.03971e-05
cg02293935_rs2084739:32214028:A:G	0.0132509	0.00539118
cg02295216_rs2232725:66586759:G:A	0.0194569	0.396996
cg02295831_rs9850367:16416405:C:T	0.00902457	0.00176986
cg02296617_rs6004052:24463748:C:T	0.00967957	0.0463297
cg02297879_rs12570944:134139057:A:G	0.00895191	9.88376e-05
cg02299500_rs7470467:129809899:T:A	0.0181479	0.837497
cg02300890_rs71934259:31567071:ATTTATTTC:A	0.0104665	0.00507473
cg02301128_rs6965344:127793761:T:G	1.10183e-08	9.81285e-08
cg02301378_rs10718313:78225499:TC:T	0.0468321	0.130783
cg02302587_rs13019891:113829869:G:T	6.9206e-06	0.460274
cg02304623_rs11742098:176151339:A:T	0.000186599	0.000186356
cg02308712_rs1870217:52596710:A:G	0.0256467	0.00252351
cg02308793_rs5769803:49411446:A:G	4.21453e-06	6.23124e-06
cg02310191_rs10929682:10732189:C:A	0.000532005	0.000405817
cg02311794_rs8040517:86302765:C:T	0.00865785	0.340412
cg02311960_rs13408738:142882822:G:T	0.0182369	0.424917
cg02313013_rs12811432:95013730:G:A	0.0065199	0.114859
cg02314692_rs12980113	0.000227475	0.409534
cg02315863_rs9918599:108242963:C:T	0.00595767	0.107377
cg02316713_rs7281551:43616325:C:T	0.0387331	0.00154675
cg02318139_rs373017678:100238917:TTTC:T	0.00016802	8.02058e-09
cg02319733_rs67173113:10289235:G:A	0.0288776	0.0533622
cg02319782_rs502783:294798:G:A	0.00467678	0.261647
cg02320813_rs12453661:5536298:T:C	0.0192678	0.00399881
cg02324920_rs3736916:105261118:C:T	0.0135843	0.536292
cg02327530_rs6953107:100095664:C:T	0.00328848	0.000264191
cg02327604_rs34968836:816188:T:TG	0.000943269	1.2703e-05
cg02328313_rs17090706:19544135:G:T	0.0190783	0.492891
cg02330683_rs1757463	0.00474579	0.321124
cg02332528_rs34811355:68285992:C:A	0.0316782	0.69517
cg02333524_rs3898882:111947467:G:A	0.0390719	0.302601
cg02333758_rs2176621	0.00720088	0.274502
cg02337193_rs33984645:54835068:CA:C	0.0172004	0.000459286
cg02340172_rs12717855:151575471:C:T	0.0287428	0.824485
cg02340312_rs9469395:33247983:G:A	0.0110808	0.0399124
cg02341114_rs2287327	0.00210697	0.796343
cg02341898_rs2278995:35530737:T:C	0.000405534	7.35901e-06
cg02342887_rs4050786:22528191:T:G	0.0281004	0.923076
cg02343103_rs1864671:197233176:G:A	0.014036	0.00227966
cg02343652_rs4643617:30485278:T:C	0.000661949	0.000494847
cg02344361_rs11146101:134815798:A:T	0.0205702	0.123807
cg02344735_rs6914786:71671192:A:C	7.43941e-05	0.0100096
cg02344784_rs35677122:104181667:AC:A	1.5567e-05	0.00172515
cg02345285_rs72205254:34393406:TTGTC:T	0.0423664	0.818561
cg02346790_rs2332241:122296912:T:C	0.00309887	0.204766
cg02347763_rs377464899:133483167:ATTTTCTTGGCATAT:A	8.67201e-05	0.850849
cg02349672_rs6004487:25607973:A:T	0.00305539	0.317572
cg02349785_rs1786171:65769809:G:C	0.00274455	0.441176
cg02350785_rs3747094:22053880:A:G	0.00047102	0.303826
cg02351231_rs2071544:32806121:T:C	0.0412369	0.753418
cg02351381_rs7973101:110176261:G:A	0.00987029	0.00124373
cg02351406_rs12884449:101444148:C:T	0.000994684	0.0144369
cg02352328_rs12933800:89121910:G:A	0.0111364	0.0384682
cg02353048_rs73223524:124719087:T:C	6.5533e-06	0.4793
cg02354225_rs7608904:151158092:G:A	4.18594e-08	5.27136e-10
cg02363750_rs11673340:35864918:C:G	1.42226e-10	2.23465e-07
cg02364654_rs72479949:47221540:CTTG:C	0.0392203	0.585971
cg02364831_rs1420528:52417241:C:G	0.00299641	0.490756
cg02365900_rs4986080:81049741:G:A	0.000984743	2.86512e-06
cg02367558_rs59613996:479729:G:GA	0.000116556	0.000938574
cg02368812_rs6919219:3020765:G:A	0.000190637	0.485762
cg02369100_rs1862112	2.37087e-05	0.0496795
cg02370923_rs10496400:106228390:A:G	0.000185513	3.80309e-05
cg02372199_rs7314490:47945956:A:G	0.0151411	0.189951
cg02372334_rs10742177:3853146:C:G	0.00398047	0.243132
cg02374401_rs58075088:15703361:T:C	0.0131206	0.0312657
cg02375585_rs3129267:33098896:C:G	0.0291124	0.00688701
cg02375832_rs597259:62430659:T:A	1.98222e-09	0.000152537
cg02376097_rs2014576:46269076:G:A	0.000207692	0.789302
cg02376745_rs35511975:12185615:C:CAG	0.000180226	0.000168404
cg02377053_rs579543:113889631:G:A	0.0321491	0.634341
cg02377101_rs4551283	0.000501638	6.70779e-05
cg02379352_rs10210026:100289352:G:A	6.95239e-05	0.949184
cg02379540_rs947403:1016601:G:A	4.74749e-09	3.91734e-09
cg02383228_rs66512417:160681058:CTGAA:C	0.0159131	0.0483034
cg02387368_rs11576668:45770167:G:C	0.00276447	0.646801
cg02389040_rs9267533:31645922:C:T	0.00792544	0.523753
cg02389590_rs35642643:110648306:T:C	0.0387777	0.318352
cg02390801_rs351174:74528508:G:A	4.8685e-06	0.000110196
cg02394506_rs56246137:102161988:T:C	0.015412	0.00449378
cg02395127_rs12441505:75107311:A:C	0.00733117	0.0551923
cg02396192_rs1440460:154849668:G:A	0.00038562	0.0134997
cg02396987_rs41445947:237194728:G:T	0.0418813	0.376973
cg02398342_rs2264578	0.000360822	8.84514e-11
cg02400001_rs11029617:26585904:T:A	0.0341807	0.675615
cg02402217_rs8031540:69328606:G:A	0.0448974	0.891419
cg02402740_rs34397660:178217508:C:G	1.16459e-10	0.000123198
cg02403198_rs888352	6.34879e-06	4.05745e-06
cg02405213_rs111238454:5042599:A:AGGCCCAGCCCC	1.79304e-06	0.000447442
cg02406165_rs1870213:52610238:T:C	0.046332	1.56419e-08
cg02407342_rs8067029:42988924:T:G	0.0455908	0.816996
cg02410801_rs300268:55046446:A:G	0.0360271	0.348156
cg02412072_rs4584370:166322024:G:A	0.00228579	0.00587954
cg02413938_rs112108926:238999088:G:A	0.0325724	0.328278
cg02414922_rs3812550:139252879:A:G	0.000988779	0.0151357
cg02414980_rs11089447:30794719:C:T	2.30509e-05	0.19748
cg02415014_rs61054943:143849203:C:T	0.0163431	0.0886048
cg02416333_rs3117946:22524584:A:G	6.86118e-14	3.05311e-14
cg02419362_rs668622:121198299:G:A	0.000265855	0.00547785
cg02421935_rs7155008:72073452:C:A	0.0112888	0.322836
cg02425595_rs9557452:101195485:G:A	0.00247566	0.0487166
cg02425746_rs34403285:86075967:T:C	0.000433173	4.05442e-07
cg02427678_rs1837984:146628742:T:G	0.000679866	0.00658752
cg02427933_rs11086935:43309293:GT:G	0.0362388	2.89625e-05
cg02428792_rs6148351:25085819:C:CAACCTTACAGTAAGTAGAGT	0.00185998	0.0133239
cg02430758_rs7396705:9161521:C:T	0.00415962	0.0255371
cg02435862_rs7219860	0.0131171	0.152423
cg02436083_rs223388:103749444:G:A	0.00981613	0.648727
cg02436969_rs10053489:171817909:G:A	0.00725629	0.377462
cg02439077_rs17512976:72210686:G:A	0.00107022	0.0362789
cg02442900_rs838718:234296650:G:A	0.0401129	0.013395
cg02443589_rs7835049:100036529:T:C	2.47325e-05	0.00304379
cg02446073_rs6888586:170740600:G:C	0.000532282	0.0388119
cg02447542_rs60179307:125712049:A:G	1.2839e-05	5.79747e-05
cg02449762_rs7924096:5652237:G:C	0.000544577	0.0124715
cg02450267_rs73406513:29637365:G:A	0.00295198	0.0079566
cg02452495_rs4838104:126832878:A:C	0.043261	0.00252608
cg02452500_rs10831983:13162449:T:G	0.00848688	0.0273169
cg02453013_rs2003630:1306040:C:G	0.000313558	0.00824743
cg02453726_rs164076	0.0241568	0.467253
cg02456451_rs7799010	0.020276	0.558027
cg02457541_rs404919:151048012:A:G	0.00238027	0.000988162
cg02461235_rs28525640:1951881:G:C	0.010275	0.298711
cg02463049_rs2373199:78142982:G:A	0.0319481	0.751065
cg02463440_rs34010761:22132864:CCT:C	0.00249487	0.0115675
cg02463727_rs533584:79001299:G:T	0.00785199	1.40195e-06
cg02464608_rs11923426:122640406:A:C	0.0188512	0.0135687
cg02465761_rs11362:6735399:C:T	0.0149141	0.774192
cg02465993_rs73167200:42566417:G:A	2.31891e-08	7.60725e-13
cg02466788_rs33991840:44745134:CATAT:C	0.000641736	3.53561e-08
cg02467005_rs10228941:16467073:C:G	0.0360914	0.0812845
cg02467073_rs58359867:1722912:T:C	0.00598012	0.79509
cg02467425_rs8136015:24566894:G:T	0.0315029	0.594947
cg02471243_rs6675163:16729608:A:G	0.0295224	0.0492292
cg02471378_6:32943979:C:CT	0.000543809	0.488866
cg02476270_rs942964:156481701:G:A	1.19143e-05	8.47677e-05
cg02479656_rs56354362:65172801:G:A	7.59987e-05	2.91263e-05
cg02481669_rs9281518:31487235:C:CA	0.0182417	0.243409
cg02481789_rs4792930	0.0250996	0.381849
cg02482240_rs807743:19103598:C:G	1.1989e-06	2.99155e-07
cg02483449_rs6700983:84326438:C:A	0.00529251	0.0837191
cg02483943_rs2579505	0.0440889	0.427141
cg02484732_rs9296832:56100909:C:G	0.000195331	0.004173
cg02484746_rs435725:43997911:A:G	0.0308578	0.127429
cg02486796_rs1979598:18420056:G:A	2.39383e-07	1.24443e-07
cg02489968_rs150243169:45666950:TGGA:T	0.0384732	0.394745
cg02490460_rs7828600:1360113:G:A	0.0153672	0.0466999
cg02492165_rs7508557:7439932:C:T	0.0117525	0.158185
cg02493364_rs107068	0.0242366	0.0409059
cg02495387_rs10459044:82552580:G:A	0.00251524	0.391512
cg02495620_rs772654	0.0240591	0.0286682
cg02498544_rs675392:102829805:G:C	0.000546917	5.92267e-07
cg02504353_rs12141801:227961403:C:T	0.0431492	0.390518
cg02506227_rs62377764:122754426:G:T	0.00764845	0.807822
cg02508664_rs1884739:87643787:A:C	0.0237294	0.0199436
cg02508830_rs6964296:102572942:C:T	0.00275373	0.0171923
cg02511539_rs4965499	0.0038318	0.665925
cg02511570_rs9912450:45402208:C:T	2.87979e-06	3.43044e-09
cg02513547_rs35373757:26030361:T:C	0.0296112	0.000438398
cg02513768_rs10810072:13992268:C:T	1.67355e-07	0.147438
cg02517201_rs4658244	0.000368283	5.18547e-05
cg02517763_rs9429826:210052146:G:A	0.0119486	9.17808e-05
cg02518068_rs665163	0.00242169	0.00011341
cg02521229_rs636317:60019150:C:T	0.0274067	0.0111574
[truncated: 29,049 more rows]
